# Supplementary material for: Nickel-catalyzed coupling reaction of alkyl halides with aryl Grignard reagents in the presence of 1,3-butadiene: mechanistic studies of four-component coupling and competing cross-coupling reactions
Source: PubMed Central journal article supplement (PMC5903371; doi:10.1039/c7sc04675h), 2018-01-05

## Electronic Supplementary Information (ESI)

### **Nickel-catalyzed coupling reaction of alkyl halides with aryl Grignard reagents in the presence of 1,3-butadiene: Mechanistic studies of four-component coupling and competing cross-coupling reactions**

Takanori Iwasaki,\*<sup>a</sup> Asuka Fukuoka,<sup>a</sup> Wataru Yokoyama,<sup>a</sup> Xin Min,<sup>a</sup> Ichiro Hisaki,<sup>b</sup> Tao Yang,\*<sup>cde</sup> Masahiro Ehara,\*<sup>cd</sup> Hitoshi Kuniyasu,<sup>a</sup> and Nobuaki Kambe\*<sup>a</sup>

<sup>a</sup> Department of Applied Chemistry, Graduate School of Engineering, Osaka University, Suita, Osaka 565-0871, Japan. <sup>b</sup> Department of Material and Life Science, Graduate School of Engineering, Osaka University, Suita, Osaka 565-0871, Japan. <sup>c</sup> Department of Theoretical and Computational Molecular Science, Institute for Molecular Science, 38 Nishigo-Naka, Myodaiji, Okazaki, Aichi 444-8585, Japan. <sup>d</sup> Elements Strategy Initiative for Catalysts and Batteries (ESICB), Kyoto University, Katsura, Kyoto 615-8510, Japan. <sup>e</sup> Fachbereich Chemie, Philipps-Universität Marburg, Hans-Meerwein-Strasse, Marburg 35032, Germany.

#### **Table of Contents**

|                                                                 |           |
|-----------------------------------------------------------------|-----------|
| <b>Additional Results</b>                                       | S2–S30    |
| <b>Materials and Methods</b>                                    | S31       |
| <b>Synthesis of Substrates</b>                                  | S32–S37   |
| <b>General Procedures</b>                                       | S38–S39   |
| <b>Characterization Data of the Isolated Compounds</b>          | S40–S64   |
| <b>Cartesian Coordinates of Optimized Structures</b>            | S65–S161  |
| <b>References</b>                                               | S162      |
| <b><sup>1</sup>H and <sup>13</sup>C NMR Spectra of Products</b> | S163–S228 |

## Additional Results

### 1. Reaction condition screening (Table 1)

Using the optimized conditions for *ortho*-unsubstituted aryl Grignard reagents (entry 4 in Table 1), we examined various parameters to improve the selectivity for the four-component coupling product **3aa**. Selected examples are summarized in Table S1. The use of 20 mol% of Ni catalyst and PPh<sub>3</sub> did not change the selectivity, but slightly affected the reaction efficiency (entry 1 vs. 2). 1,1'-Bis(diphenylphosphino)ferrocene (dppf) depressed the selectivity to 0.9 (entry 3). Tetramethylethylenediamine (TMEDA) improved neither the total yield nor the selectivity (entry 4). The addition of LiI largely affected the selectivity, yielding **4aa** as the major product (entry 5). The addition of MgBr<sub>2</sub> afforded a 1:1 mixture of **3aa** and **4aa** in 61% total yield (entry 6). When the reaction was conducted in a mixed solvent of toluene and THF in 1:1 ratio, the yields of both **3aa** and **4aa** decreased to 24% and 31%, respectively, whereas the selectivity (**3aa/4aa**) dropped to 0.8 (entry 8). A similar tendency was observed in the mixed solvent system of hexane and THF (entry 9). On the other hand, the use of polar solvents such as dioxane and HMPA as co-solvents affected both four-component and cross-coupling reactions, resulting in a low yield (25% total yield) and no reaction, respectively.

**Table S1 Additional Results of Screening of Reaction Conditions**

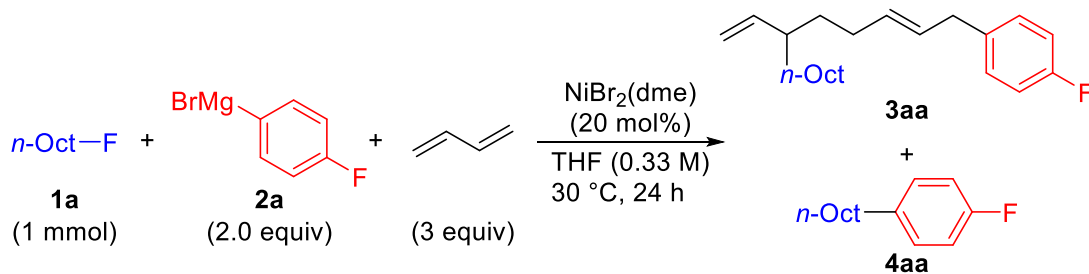

| entry | variation from above conditions        | <b>3aa</b> (%) <sup>a</sup> | <b>4aa</b> (%) <sup>a</sup> | <b>3aa/4aa</b> |
|-------|----------------------------------------|-----------------------------|-----------------------------|----------------|
| 1     | none                                   | 57                          | 42                          | 1.4            |
| 2     | PPh <sub>3</sub> (20 mol%) was added.  | 46                          | 34                          | 1.4            |
| 3     | dppf (20 mol%) was added.              | 30                          | 35                          | 0.9            |
| 4     | TMEDA (20 mol%) was added.             | 40                          | 35                          | 1.1            |
| 5     | LiI (20 mol%) was added.               | 29                          | 48                          | 0.6            |
| 6     | MgBr <sub>2</sub> (20 mol%) was added. | 30                          | 31                          | 1.0            |
| 7     | 10 mol% of Ni cat.                     | 63                          | 37                          | 1.7            |
| 8     | 10 mol% of Ni cat in toluene/THF (1:1) | 24                          | 31                          | 0.8            |
| 9     | 10 mol% of Ni cat in hexane/THF (1:1)  | 26                          | 32                          | 0.8            |

<sup>a</sup>Determined by GC.

## 2. NMR studies of the stoichiometric reaction (eqn 3)<sup>S1</sup>

NMR samples were prepared as follows, and the <sup>1</sup>H NMR spectra at 20 °C are shown in Fig. 1.

**Sample A (Fig. 1a):** In a glove box, a 5-mm NMR tube was charged with Ni(cod)<sub>2</sub> (5.5 mg, 0.02 mmol) and THF-*d*<sub>8</sub> (0.6 mL) and sealed with a screw cap. The NMR tube was taken out of the glove box and sonicated for a few minutes.

**Sample B (Fig. 1b):** In a glove box, a 5-mm NMR tube was charged with Ni(cod)<sub>2</sub> (5.5 mg, 0.02 mmol) and a solution of 1,3-butadiene in THF-*d*<sub>8</sub> (0.17 M, 0.6 mL) and sealed with a screw cap. The NMR tube was taken out of the glove box and sonicated for a few minutes.

**Sample C (Fig. 1c):** To a 5-mm NMR tube was added 2,6-dimethylphenylmagnesium bromide solution in THF (0.83 M, 48 μL, 0.04 mmol) under nitrogen atmosphere, and the tube was sealed with a screw cap. Most of the THF was then removed by evaporation under reduced pressure through the screw cap. Ni(cod)<sub>2</sub> (5.5 mg, 0.02 mmol) and a solution of 1,3-butadiene in THF-*d*<sub>8</sub> (0.17 M, 0.6 mL) were added into the NMR tube in a glove box. After sealing with a screw cap, the NMR tube was taken out of the glove box and sonicated for a few minutes.

As shown in Fig. 1b, a set of broad signals and signals of free COD appeared upon the addition of 1,3-butadiene to Ni(cod)<sub>2</sub>, in conjunction with the disappearance of signals of free 1,3-butadiene (in THF-*d*<sub>8</sub> at rt: δ 6.28 (m, 2H), 5.13 (dd, *J* = 16.0, 1.6 Hz, 2H), 5.01 (dd, *J* = 8.8, 1.6 Hz, 2H)). This is probably due to the fast equilibrium among π-complexes of Ni(0) and 1,3-butadiene (Ni(C<sub>4</sub>H<sub>6</sub>)<sub>n</sub>) including ligand exchange with free 1,3-butadiene. The π-complexes would also be in equilibrium with Ni(cod)<sub>2</sub>, but this step should be slow because the shift of the Ni(cod)<sub>2</sub> peaks is negligible. No peaks assignable to bis(π-allyl)nickel complex **A** were observed in Fig. 1b, implying that this complex is not relatively stable thermodynamically in the presence of butadiene or that the complex **A** is in fast equilibrium with a variety of possible π-complexes. The addition of an aryl Grignard reagent to the mixture of Ni(cod)<sub>2</sub> and 1,3-butadiene resulted in sharp signals (Fig. 1c). Although some signals were overlapped with the solvent, the signals at δ 6.36 (d, *J* = 7.2 Hz, 1H, *Ar*), 5.69 (q, *J* = 8.8 Hz, 1H, β-H of σ-allyl), 3.92 (q, *J* = 7.2 Hz, 1H, γ-H of σ-allyl), 2.52 (s, 3H, *Me*), 2.21 (s, 3H, *Me*), 2.03 (dd, *J* = 11.2, 4.0 Hz, 1H, α-H of σ-allyl), 1.24 (d, *J* = 8.4 Hz, 1H, π-allyl), 0.84 (dd, *J* = 7.2, 4.4 Hz, 1H, α-H of σ-allyl) could be assigned to the corresponding ate complex **B** (*vide infra*). The NMR spectra did not change at temperatures between 25 °C and -40 °C. In addition, the NMR spectrum after 24 h at rt remained the same, suggesting that the ate complex is thermally stable in THF.

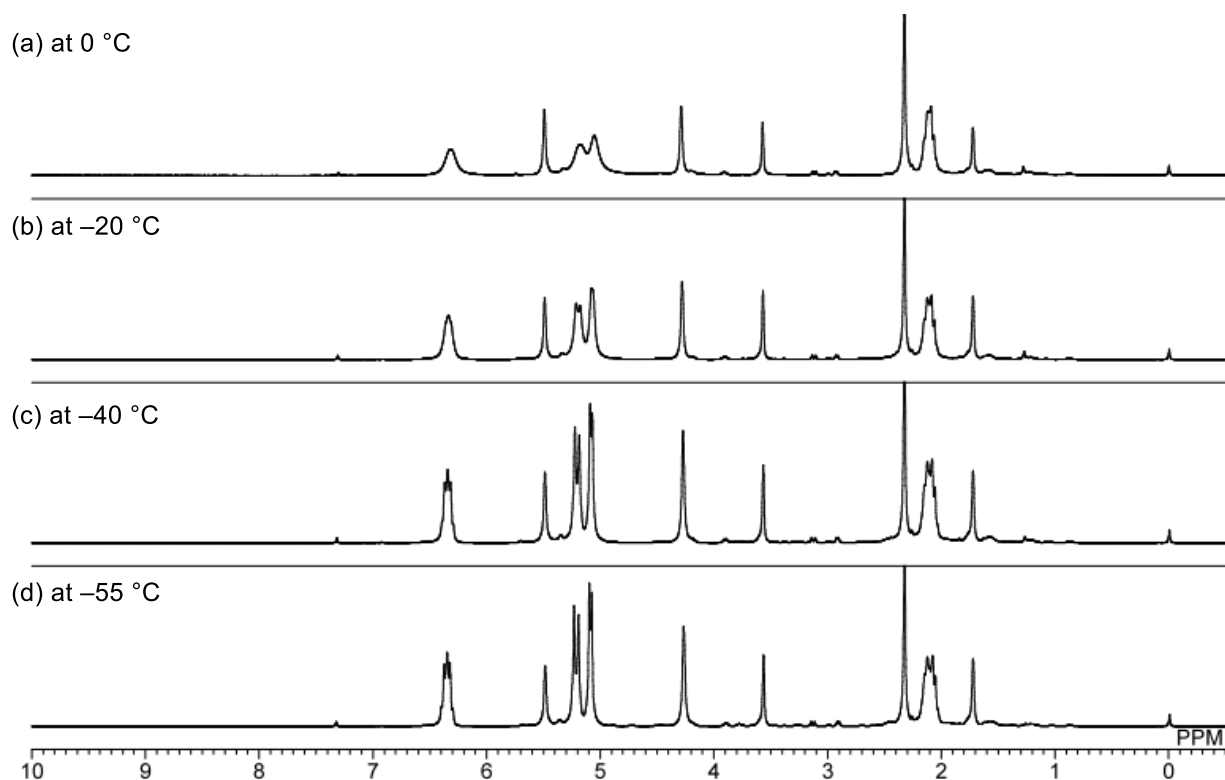

Fig. S1 VT NMR spectra of THF- $d_8$  solution of Ni(cod) $_2$  (0.02 mmol) and 1,3-butadiene (0.10 mmol).

In the variable temperature (VT) NMR study of the mixture of Ni(cod) $_2$  and 1,3-butadiene (Sample B), peaks assignable to free 1,3-butadiene became sharp upon cooling. The equilibrium mentioned above between Ni(cod) $_2$  and  $\pi$ -complexes of Ni(0) with 1,3-butadiene became slower at  $-55$  °C in THF (Fig. S1). When ArMgBr was added to this mixture, anionic complexes were yielded, exclusively. This is in accord with the report that Ni(cod) $_2$  reacts with two molecules of 1,3-butadiene in the presence of phosphine ligands to form Ni(PR $_3$ )( $\eta^1, \eta^3$ -C $_3$ H $_2$ ) which is isoelectronic to the ate complex **B**.<sup>S2</sup>

Possible intermediates and pathways leading to the anionic intermediate **B** from Ni(cod) $_2$  are depicted in Scheme S1. Many possible  $\pi$ -complexes (**I** to **VI**) may be present in rapid equilibria with each other and free 1,3-butadiene. Thus, the above-mentioned broadening of the 1,3-butadiene peaks was observed. After cooling to  $-55$  °C, ligand exchange became slower, and peaks of free 1,3-butadiene became sharp. However, coordinated 1,3-butadiene was not observed due to the rapid equilibria among  $\pi$ -complexes **I** to **VI**. It is reported that Ni(0) species undergo complexation with two molecules of 1,3-butadiene to give bis( $\eta^4$ -butadiene) complex **IV**, which is in equilibrium with the 16-electron complex **V** and can accept further coordination of 1,3-butadiene to form the tris( $\eta^2$ -butadiene) complex **VI**.<sup>S3</sup> The activation free energies of oxidative dimerization of 1,3-butadiene on Ni complexes **IV** and **VI** were calculated as 16.2 and 12.6 kcal/mol, respectively.<sup>S3</sup> Therefore, the oxidative dimerization would proceed from complex **VI** rather than **IV**. Thus, the formed complex **VIII** reacts directly with Grignard

reagents or via dissociation of 1,3-butadiene through complex A (Scheme S1).

**Scheme S1 Equilibrium Between Ni(0) and Anionic Ni Complexes**

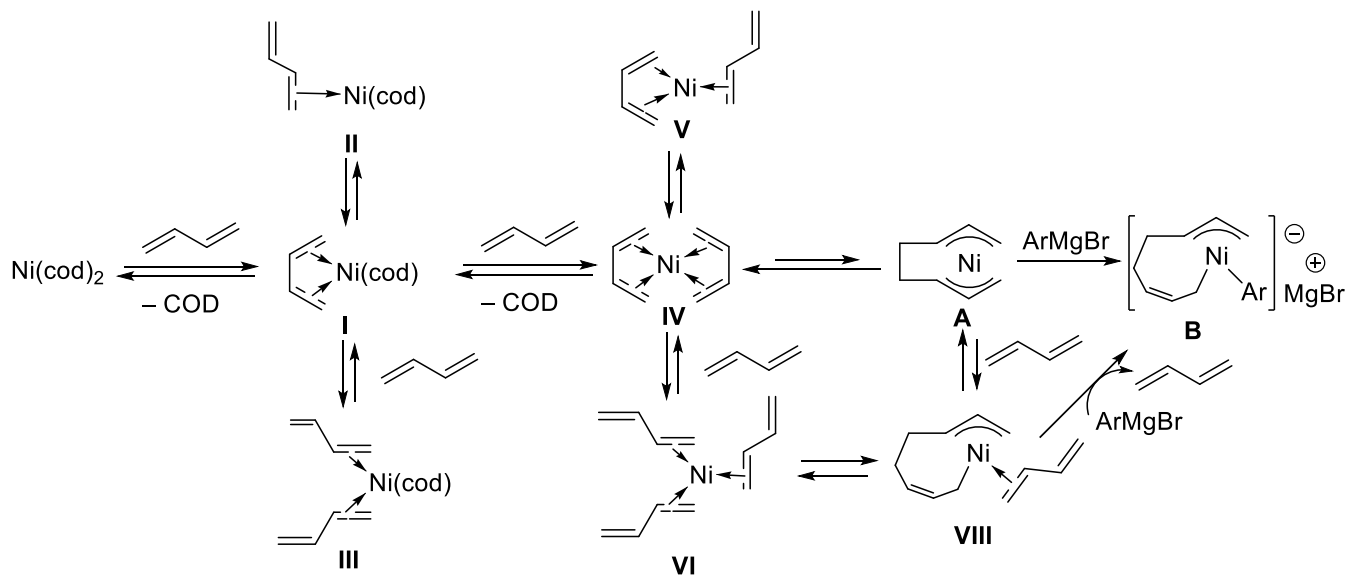

### 3. Isolation and reactivity of an anionic Ni complex (Scheme 5)

#### 3-1. Synthesis of nickelate complex (7)<sup>S1</sup>

Into a suspension of Ni(cod)<sub>2</sub> (277 mg, 1.01 mmol) in Et<sub>2</sub>O (5 mL) was added 2,6-dimethylphenyllithium (in Et<sub>2</sub>O, 0.54 M, 2.8 mL, 1.51 mmol) and 1,3-butadiene (135 mL as gas, 6.0 mmol) at -78 °C. Then, the mixture was allowed to warm to rt and stirred for 1 h. The resulting orange solution was again cooled to -78 °C, slightly depressurized, and the Schlenk tube was brought into a glove box. Orange oily precipitates were formed upon adding DME (1 mL) followed by pentane (10 mL). The supernatant was removed by decantation, and the orange precipitates were washed with pentane for three times. The precipitates were dissolved in toluene (10 mL) and filtrated to remove insoluble solids. The obtained organic solution was concentrated to give an orange semisolid which was again dissolved in Et<sub>2</sub>O. The resulting orange suspension was filtrated and concentrated in vacuo to give an orange semisolid (522 mg, 94%): <sup>1</sup>H NMR (400 MHz, THF-*d*<sub>8</sub>): δ 6.35 (d, *J* = 6.0 Hz, 1H, H<sub>k</sub>), 6.21 (d, *J* = 6.0 Hz, 1H, H<sub>k'</sub>), 6.18 (t, *J* = 6.0, Hz, 1H, H<sub>l</sub>), 5.70 (q like, *J* = 8.0 Hz, 1H, H<sub>g</sub>), 3.90 (q, *J* = 7.2 Hz, 1H, H<sub>f</sub>), 3.60 (td, *J* = 12.0, 7.2 Hz, 1H, H<sub>b</sub>), 3.37 (s, 12H, H<sub>o</sub>), 3.21 (s, 18H, H<sub>n</sub>), 2.51 (s, 3H, H<sub>m</sub>), 2.23 (s, 3H, H<sub>m'</sub>), 2.02 (dd, *J* = 10.8, 3.2 Hz, 1H, H<sub>h</sub>), 1.91–1.81 (m, 2H, H<sub>d</sub> & H<sub>e</sub>), 1.55 (dd, *J* = 7.2, 1.6 Hz, 1H, H<sub>c</sub>), 1.54–1.46 (m, 2H, H<sub>a</sub> & H<sub>e</sub>), 1.23 (d, *J* = 12.8 Hz,

1H, H<sub>a</sub>), 0.88 (dd, *J* = 7.6, 4.8 Hz, 1H, H<sub>h</sub>), 0.70–0.60 (m, 1H, H<sub>d</sub>): <sup>13</sup>C NMR (100 MHz, THF-*d*<sub>8</sub>): δ 186.3 (s, C<sub>i</sub>), 143.1 (s, C<sub>j</sub>), 142.9 (s, C<sub>j'</sub>), 137.3 (d, C<sub>g</sub>), 121.0 (d, C<sub>k</sub>), 120.0 (d, C<sub>k'</sub>), 117.2 (d, C<sub>l</sub>), 101.2 (d, C<sub>b</sub>), 99.6 (d, C<sub>f</sub>), 71.7 (t, C<sub>o</sub>), 58.7 (d, C<sub>c</sub>), 57.9

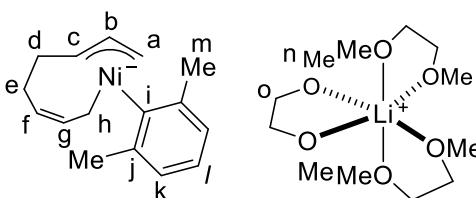

(q, C<sub>n</sub>), 39.2 (t, C<sub>a</sub>), 28.9 (t, C<sub>d</sub>), 27.0 (q, C<sub>m</sub>), 26.1 (q, C<sub>m'</sub>), 25.2 (t, C<sub>e</sub>), 12.3 (t, C<sub>h</sub>). <sup>1</sup>H and <sup>13</sup>C NMR as well as COSY and HMQC spectra of complex **7** are shown in Figs. S2-S4. These data are in accord with those of similar compounds Ni(PR<sub>3</sub>)(η<sup>1</sup>,η<sup>3</sup>-C<sub>8</sub>H<sub>12</sub>)<sup>S2</sup>, [Ni(η<sup>3</sup>-C<sub>3</sub>H<sub>5</sub>)(C<sub>4</sub>H<sub>8</sub>)]<sup>-</sup>[Li(tmeda)<sub>2</sub>]<sup>+</sup>,<sup>S4</sup> and Pd(PMe<sub>3</sub>)(η<sup>1</sup>,η<sup>3</sup>-C<sub>8</sub>H<sub>12</sub>).<sup>S5</sup> However, after drying under vacuo at rt for several hours, the orange semisolid turned to black semisolid probably due to decomposition. Therefore, elemental analysis did not give a satisfactory result: Anal. Calcd for C<sub>28</sub>H<sub>51</sub>O<sub>6</sub>NiLi: C, 61.22; H, 9.36. Found: C, 60.21; H, 8.47.

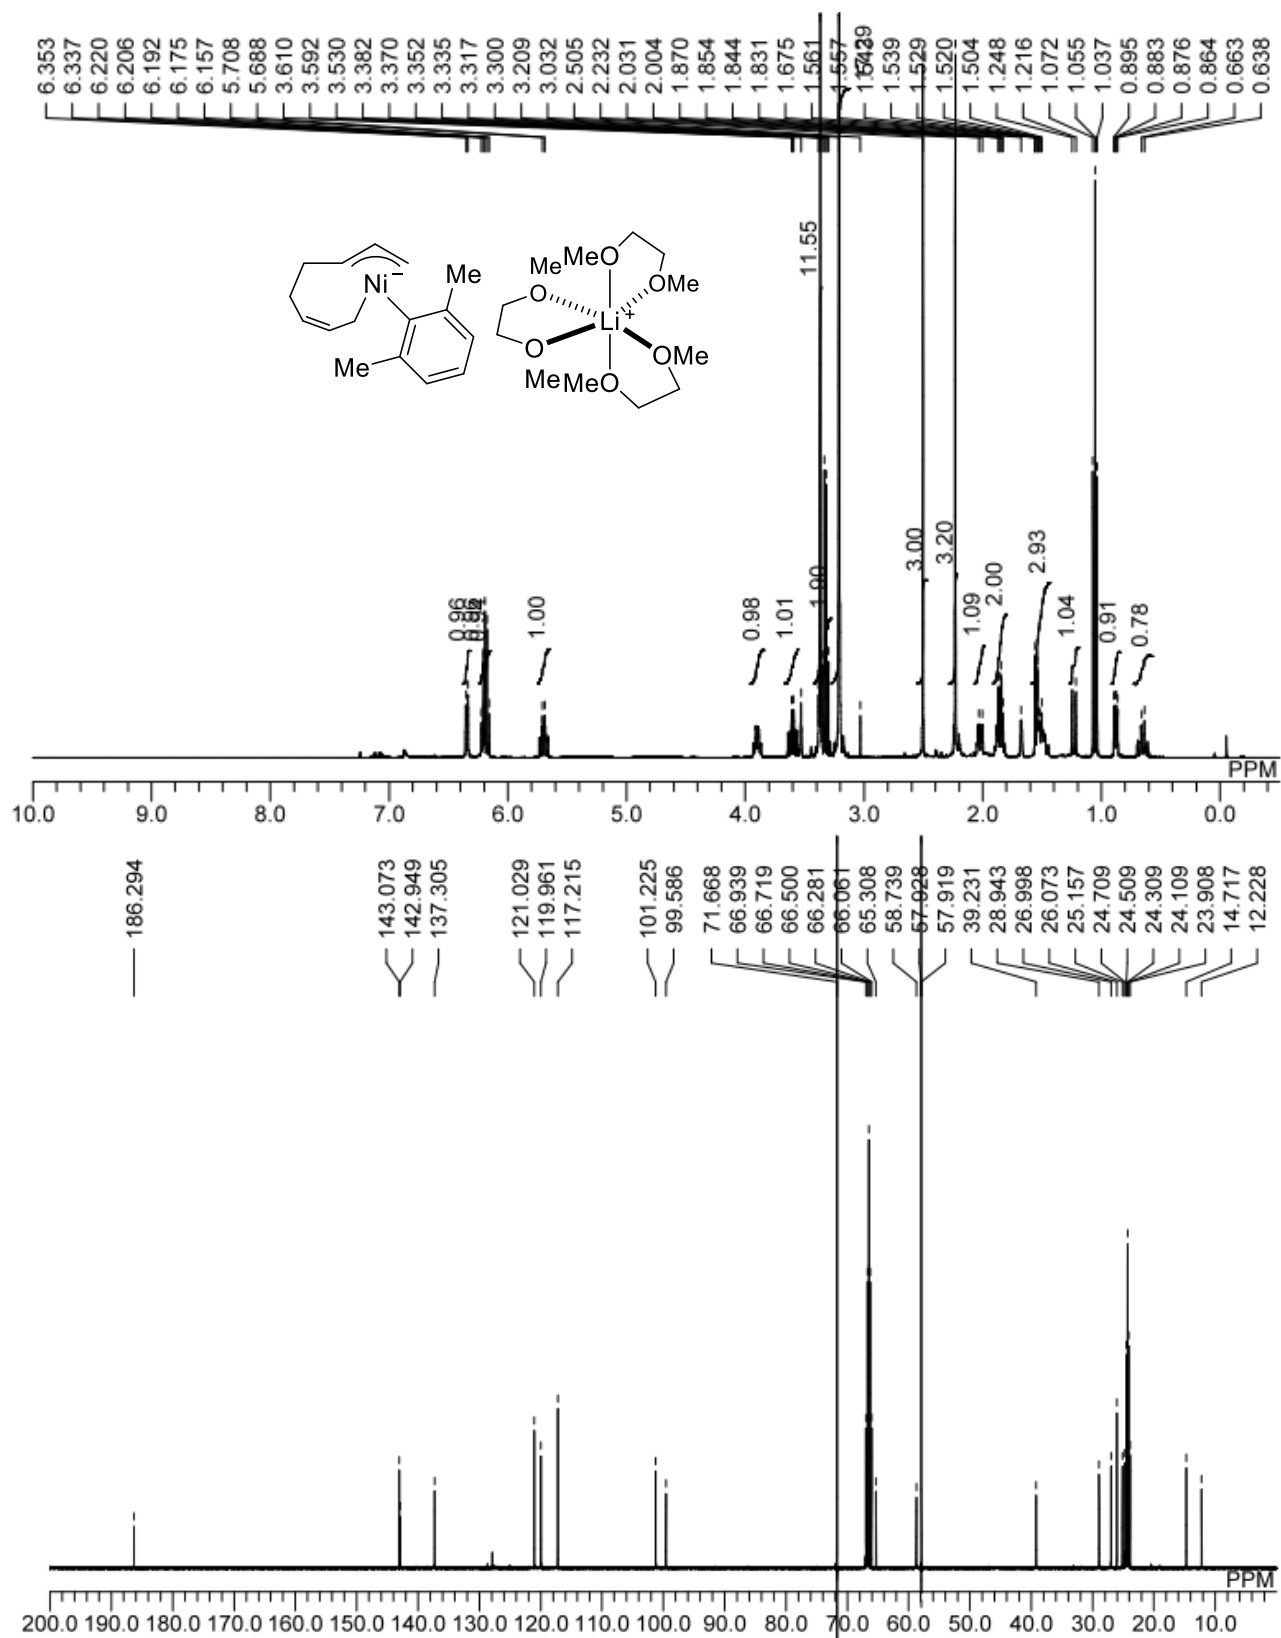

Fig. S2  $^1\text{H}$  and  $^{13}\text{C}$  NMR spectra of Ni complex **7** in  $\text{THF-}d_8$ .

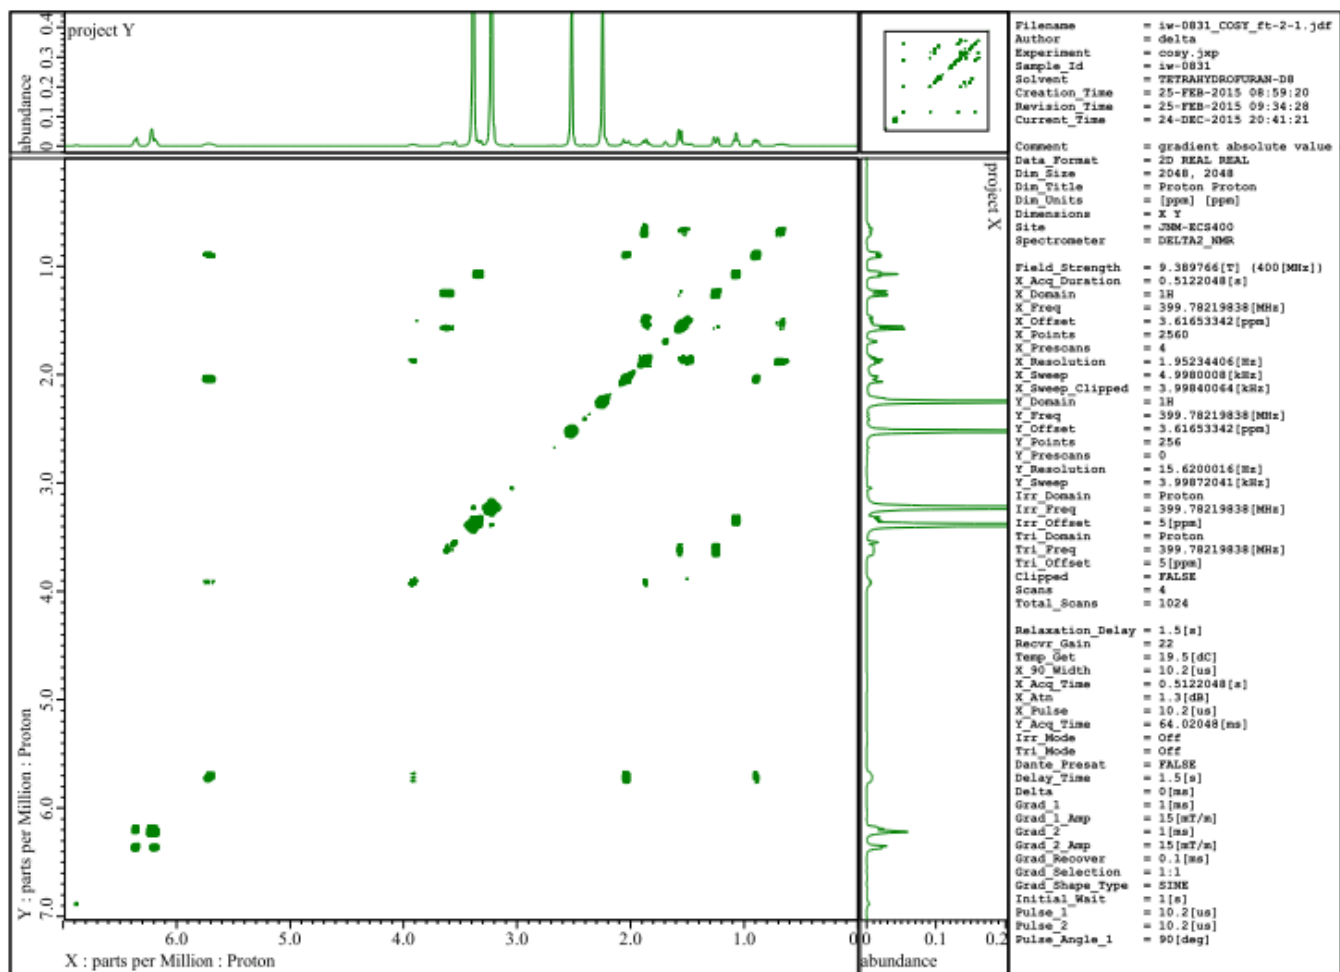

Fig. S3 COSY spectrum of Ni complex **7** in THF-*d*<sub>8</sub>.



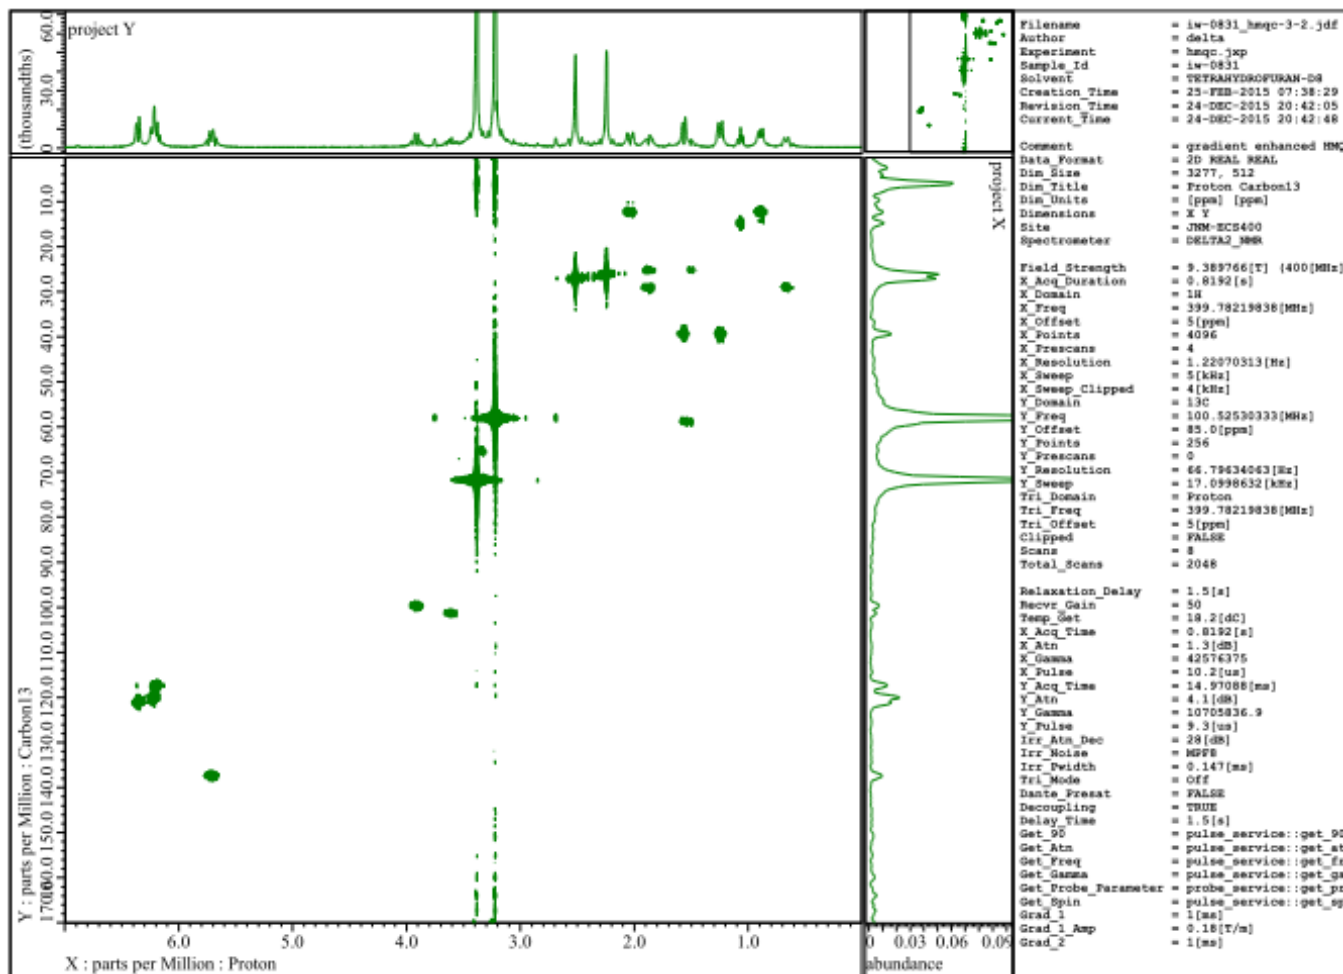

Fig. S4 HMQC spectrum of Ni complex **7** in THF-*d*<sub>8</sub>.

### 3-2. Four-component coupling reaction using the nickelate complex **7** (eqn 4)<sup>S1</sup>

An oven-dried test tube was charged with the formed nickelate complex **7** (14.1 mg, 5 mol%) and a stirring bar and closed with a septum cap in a glove box. The test tube was brought out of the glove box and into it were added 1-fluorooctane (66.6 mg, 0.5 mmol), THF (0.6 mL), 2,6-dimethylphenylmagnesium bromide (in THF, 0.83 M, 0.9 mL, 0.75 mmol), and 1,3-butadiene (34 mL as gas, 1.5 mmol) by syringe at  $-78$  °C. The mixture was then stirred at 40 °C. After 10 h, the reaction mixture was diluted with Et<sub>2</sub>O, carefully quenched by 1N HCl aq., and analyzed by GC using dodecane as an internal standard to determine the yield of the desired product **3am** (88%).

### 3-3. The reaction of complex **11** with alkyl bromides

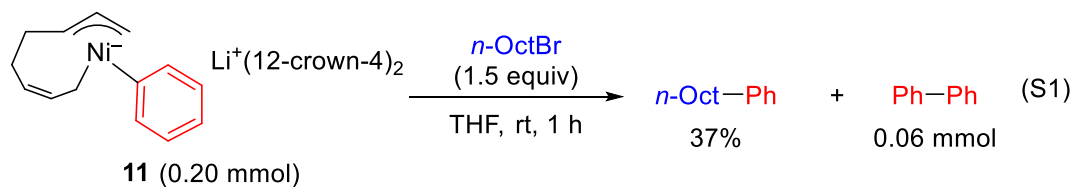

When complex **11** (119 mg, 0.20 mmol) was treated with *n*-OctBr (52  $\mu\text{L}$ , 0.30 mmol) in THF at rt for 1 h, 0.23 mmol of *n*-OctBr was consumed to give the cross-coupling product, *n*-Oct-Ph, in 37% yield along with biphenyl (0.06 mmol) (eqn S1). This result shows that alkyl bromides could react with anionic Ni complex having Li as the cation in sharp contrast with the case of alkyl fluorides (Schemes 6 and 7).

#### 4. X-ray crystallographic analysis (Fig. 2)

Single crystals of  $[\text{Ni}(\text{C}_8\text{H}_9)(\text{C}_8\text{H}_{12})\cdot\text{Li}(12\text{-crown-4})_2]_4(\text{thf})(\text{C}_5\text{H}_{12})_2$  (**8**) suitable for X-ray crystallography were obtained by recrystallization of  $\text{Ni}(\text{C}_8\text{H}_9)(\text{C}_8\text{H}_{12})\cdot\text{Li}(\text{dme})_3$  (**7**) from THF containing 12-crown-4 and pentane at  $-25\text{ }^\circ\text{C}$  under  $\text{N}_2$  atmosphere. The crystal was mounted on a CryoLoop (Hampton Research Corp.) with a layer of light mineral oil (dried over metallic Na at  $100\text{ }^\circ\text{C}$  for overnight) and placed in a nitrogen stream at  $123(2)\text{ K}$ . Measurements were made on a Rigaku RAXIS-RAPID diffractometer with a 2-D area detector using graphite-monochromated Cu-K $\alpha$  radiation ( $\lambda = 1.54187\text{ \AA}$ ). The structure of the complex **8** was solved by direct methods (SHELXS97<sup>S6</sup>). The structure was refined on  $F^2$  by the full-matrix least-squares method using SHELXL Version 2014/7.<sup>S6</sup> The non-hydrogen atoms were anisotropically refined, while the hydrogen atoms were refined using the riding model. The function being minimized was  $[\sum w(F_o^2 - F_c^2)^2]$  ( $w = 1 / [\sigma^2(F_o^2) + (0.1940\text{P})^2 + 0.0000\text{P}]$ ), where  $\text{P} = (\text{Max}(F_o^2, 0) + 2F_c^2) / 3$  for counting statistics. The functions  $R1$  and  $wR2$  were  $(\sum||F_o| - |F_c|| / \sum|F_o|)$  and  $[\sum(w(F_o^2 - F_c^2)^2) / \sum w(F_o^2)^2]^{1/2}$ , respectively. The Mercury program was used to draw the molecular structure. One of the pentane molecules was disordered in two conformations with a  $0.510(17):0.490(17)$  ratio.

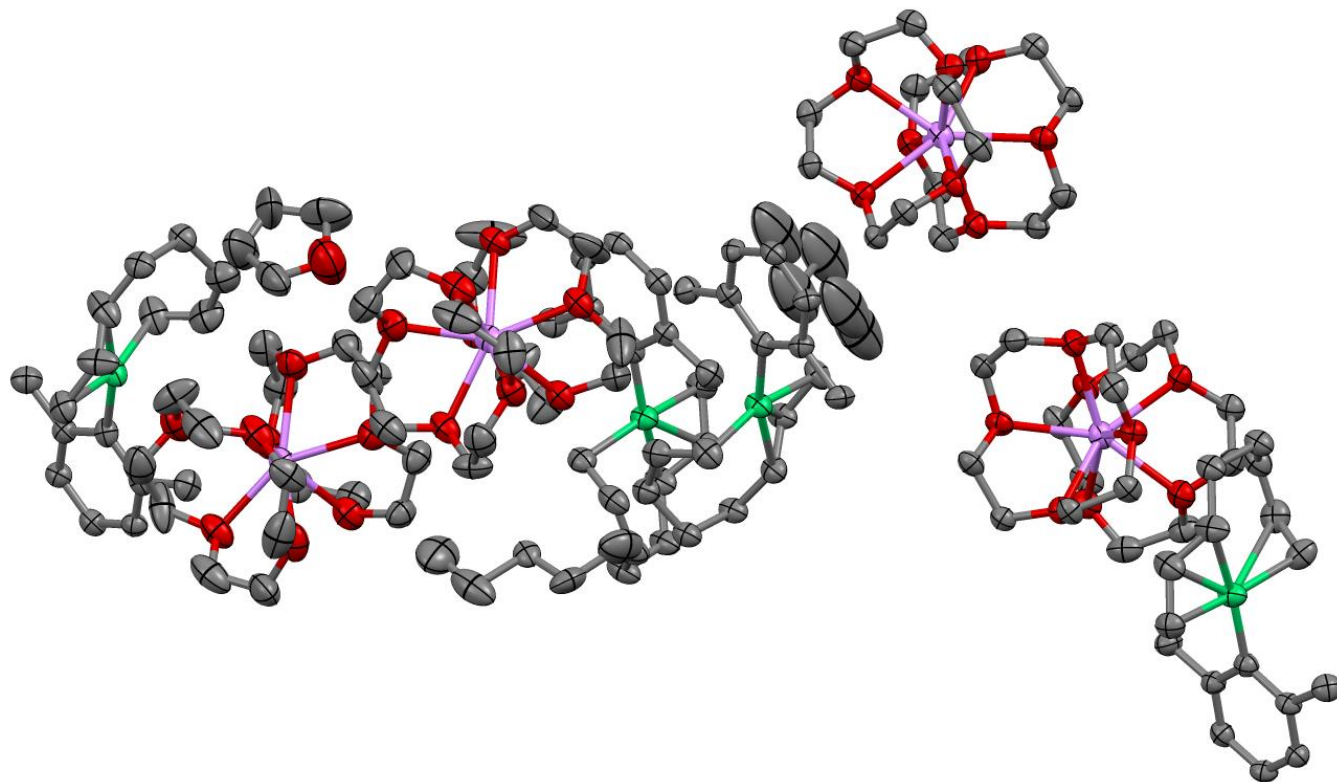

Fig. S5 ORTEP drawing of complex **8** with thermal ellipsoids at the 30% probability level. All hydrogen atoms and disordered carbons of pentane are omitted for clarity.

**Table S2 Crystal Data and Data Collection Parameters of [Ni(C<sub>8</sub>H<sub>9</sub>)(C<sub>8</sub>H<sub>12</sub>)·Li(12-crown-4)<sub>2</sub>]<sub>4</sub>(thf)(C<sub>5</sub>H<sub>12</sub>)<sub>2</sub> (8)**

|                                                      |                                                                                   |
|------------------------------------------------------|-----------------------------------------------------------------------------------|
| empirical formula                                    | C <sub>142</sub> H <sub>244</sub> Li <sub>4</sub> Ni <sub>4</sub> O <sub>33</sub> |
| formula weight                                       | 2742.03                                                                           |
| color, description                                   | yellow, block                                                                     |
| temperature, K                                       | 123(2)                                                                            |
| crystal system                                       | Triclinic                                                                         |
| space group                                          | P-1 (#2)                                                                          |
| <i>a</i> , Å                                         | 11.4664(2)                                                                        |
| <i>b</i> , Å                                         | 24.2697(4)                                                                        |
| <i>c</i> , Å                                         | 28.3765(5)                                                                        |
| $\alpha$ , °                                         | 67.4550(7)                                                                        |
| $\beta$ , °                                          | 88.5760(7)                                                                        |
| $\gamma$ , °                                         | 85.7540(7)                                                                        |
| <i>V</i> , Å <sup>3</sup>                            | 7273.2(2)                                                                         |
| <i>Z</i>                                             | 2                                                                                 |
| <i>D</i> <sub>calcd</sub> , g/cm <sup>-3</sup>       | 1.252                                                                             |
| $2\theta_{max}$ , deg                                | 143.7                                                                             |
| limiting indices                                     | -14 ≤ <i>h</i> ≤ 14, -29 ≤ <i>k</i> ≤ 29, -34 ≤ <i>l</i> ≤ 34                     |
| absorption coefficient,<br>max. and min.             | 1.157<br>0.891 (max)/0.664 (min)                                                  |
| F(000)                                               | 3968.00                                                                           |
| crystal size, mm                                     | 0.30 × 0.15 × 0.10                                                                |
| goodness-of-fit on <i>F</i> <sup>2</sup>             | 1.052                                                                             |
| no. of reflections measured                          | 177793                                                                            |
| unique data ( <i>R</i> <sub>int</sub> )              | 27611 (0.0795)                                                                    |
| <i>R</i> 1, <i>wR</i> 2 [ <i>I</i> > 2σ( <i>I</i> )] | 0.1017, 0.2986                                                                    |
| <i>R</i> 1, <i>wR</i> 2 (all data)                   | 0.1745, 0.3607                                                                    |
| residual electron density, e Å <sup>-3</sup>         | 0.99 (max), -0.68 (min)                                                           |

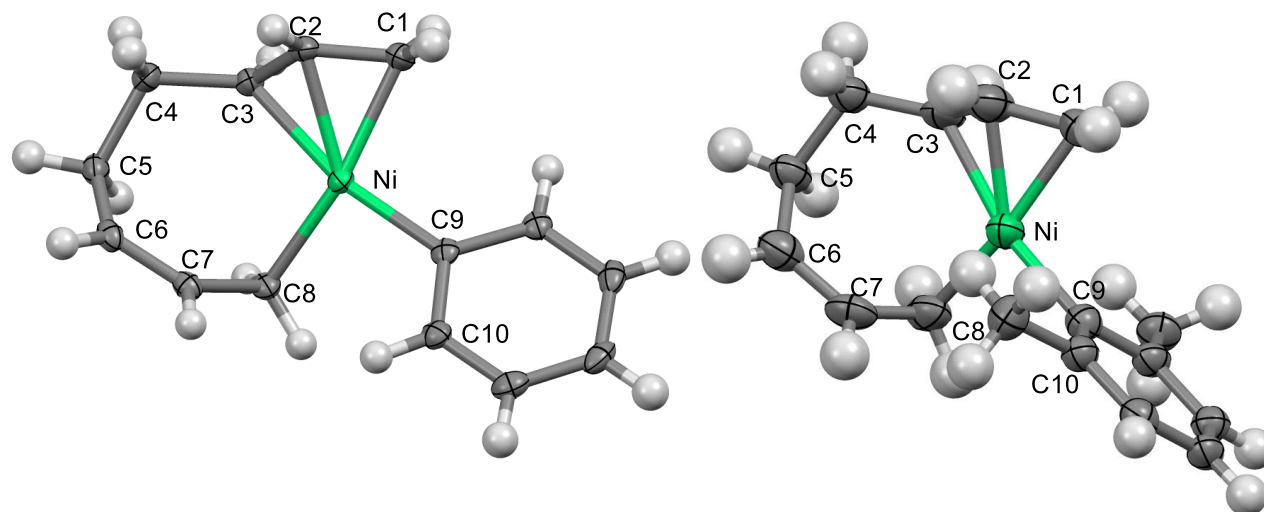

Fig. S6 ORTEP drawing of the anionic parts of complexes **11** (left)<sup>S7</sup> and **8** (right, one of the four asymmetric units).

**Table S3 Selected Bond Lengths and Angles of Complex 11 and Four Asymmetric Units of Complex 8**

| bond length (Å)<br>/angle (°)    | <b>11</b>  | <b>8</b>  |          |           |           |
|----------------------------------|------------|-----------|----------|-----------|-----------|
|                                  |            | Unit 1    | Unit2    | Unit 3    | Unit 4    |
| Ni–C1                            | 2.012(2)   | 2.016(7)  | 2.011(7) | 2.006(7)  | 2.017(7)  |
| Ni–C2                            | 2.0032(19) | 1.964(9)  | 1.982(6) | 1.979(8)  | 1.941(6)  |
| Ni–C3                            | 2.123(2)   | 2.121(7)  | 2.127(6) | 2.110(6)  | 2.115(8)  |
| Ni–C8                            | 1.979(2)   | 2.020(7)  | 2.007(7) | 1.982(8)  | 2.055(7)  |
| Ni–C9                            | 1.928(2)   | 1.912(6)  | 1.917(5) | 1.889(6)  | 1.920(6)  |
| C6–C7                            | 1.346(3)   | 1.406(10) | 1.365(9) | 1.371(10) | 1.410(12) |
| C1–Ni–C3                         | 73.02(9)   | 74.1(3)   | 73.7(3)  | 73.4(3)   | 74.3(3)   |
| C3–Ni–C8                         | 93.64(9)   | 93.2(3)   | 94.3(3)  | 94.8(3)   | 91.4(3)   |
| C8–Ni–C9                         | 95.76(9)   | 95.9(3)   | 95.2(2)  | 95.2(3)   | 96.9(3)   |
| C9–Ni–C1                         | 96.48(9)   | 95.7(3)   | 95.9(3)  | 95.6(3)   | 96.1(3)   |
| SUM <sup>a</sup>                 | 358.9      | 358.9     | 359.1    | 359.0     | 358.7     |
| Torsion angle of<br>C8–Ni–C9–C10 | 42.51(13)  | 106.7(4)  | 97.7(5)  | 99.9(4)   | 104.8(5)  |

<sup>a</sup>Sum of angles around Ni atom.

## 5. Kinetic studies

### 5-1. Determination of rate law (Fig. 3)

Plots of concentration of product **3aj** against reaction time under the various initial concentrations of catalyst and substrates (Standard conditions: *n*-OctF = 0.33 M, *o*-TolMgBr = 0.50 M, NiBr<sub>2</sub>(dme) = 0.017 M, and 1,3-butadiene = 1.0 M (eqn S2)) are shown in Figs. S7-10, where a short induction period was observed. This is probably due to the reduction of Ni salt by Grignard reagent. Therefore, the fitting lines do not cross the origin. Reaction rates were estimated from the slope of the plots at 300 to 1800 seconds. The obtained reaction rates are summarized in Tables S4-7. The double logarithm plots of obtained data are shown in Fig. 3.

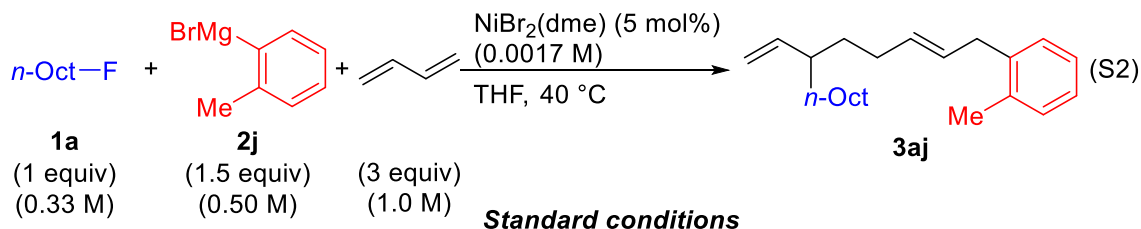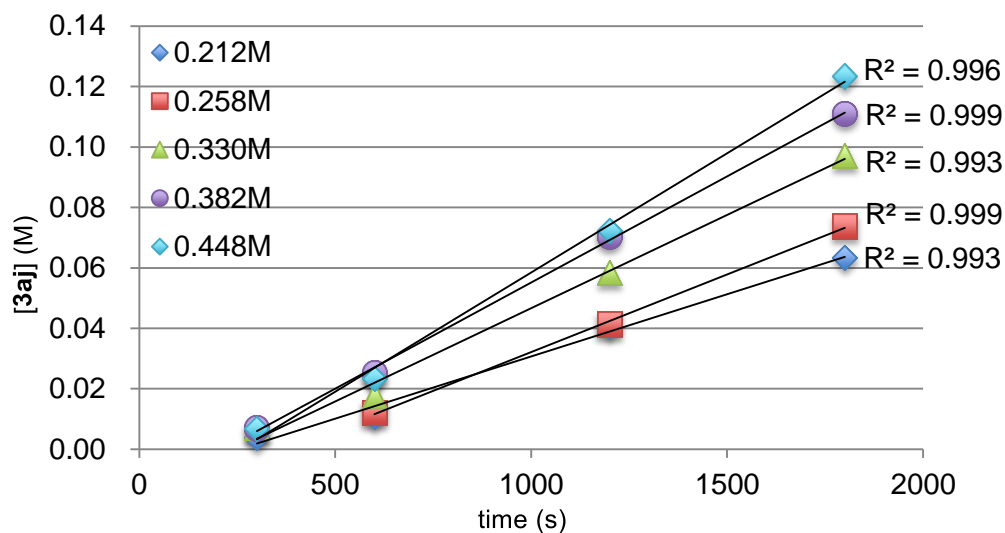

Fig. S7 Plot of product concentration against reaction time using *n*-OctF at 0.212 to 0.448 M.

**Table S4 Kinetics on *n*-OctF (1a)**

| entry | initial concentration of <i>n</i> -OctF [M] | reaction rate [ $10^{-5}$ M/s] |
|-------|---------------------------------------------|--------------------------------|
| 1     | 0.212                                       | $4.12 \pm 0.25$                |
| 2     | 0.258                                       | $5.13 \pm 0.15$                |
| 3     | 0.330                                       | $6.17 \pm 0.37$                |
| 4     | 0.382                                       | $7.03 \pm 0.15$                |
| 5     | 0.448                                       | $7.89 \pm 0.35$                |

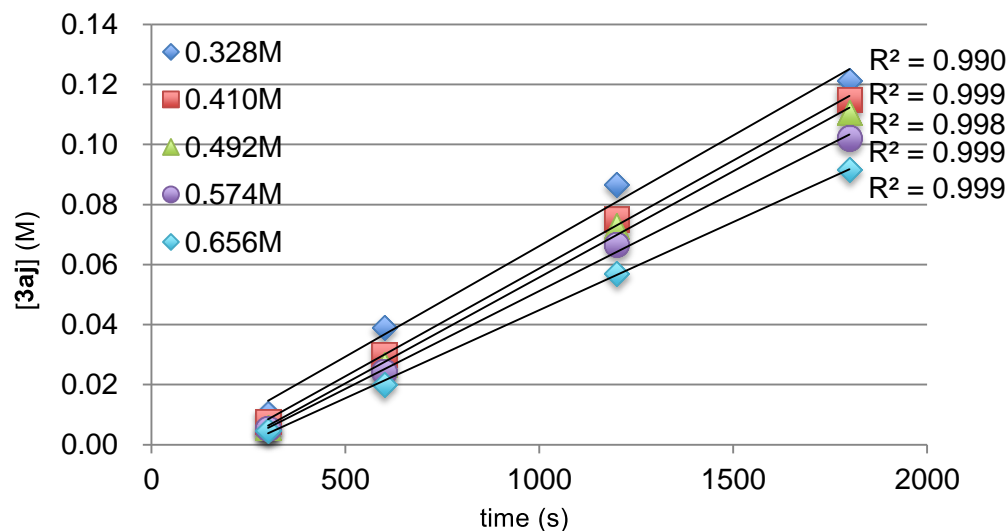

Fig. S8 Plot of product concentration against reaction time using *o*-TolMgBr at 0.328 to 0.656 M.

**Table S5 Kinetics on *o*-TolMgBr (2j)**

| entry | initial concentration of <i>o</i> -TolMgBr [M] | reaction rate [ $10^{-5}$ M/s] |
|-------|------------------------------------------------|--------------------------------|
| 1     | 0.328                                          | $7.37 \pm 0.52$                |
| 2     | 0.410                                          | $7.18 \pm 0.16$                |
| 3     | 0.492                                          | $7.06 \pm 0.21$                |
| 4     | 0.574                                          | $6.51 \pm 0.17$                |
| 5     | 0.656                                          | $5.86 \pm 0.09$                |

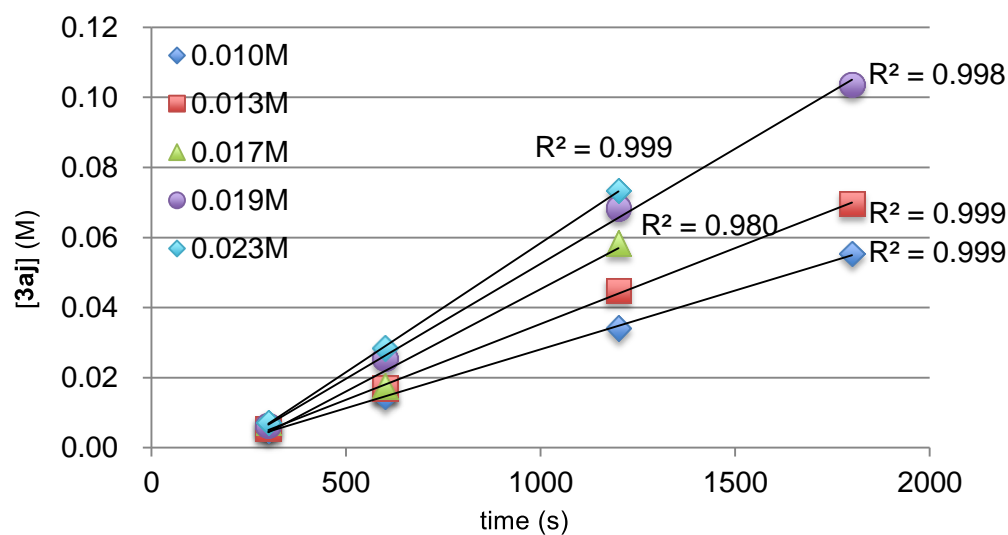

Fig. S9 Plot of product concentration against reaction time using NiBr<sub>2</sub>(dme) at 0.010 to 0.023 M.

**Table S6 Kinetics on NiBr<sub>2</sub>(dme)**

| entry | initial concentration of NiBr <sub>2</sub> (dme) [M] | reaction rate [ $10^{-5}$ M/s] |
|-------|------------------------------------------------------|--------------------------------|
| 1     | 0.010                                                | $3.36 \pm 0.05$                |
| 2     | 0.013                                                | $4.33 \pm 0.08$                |
| 3     | 0.017                                                | $5.84 \pm 0.37$                |
| 4     | 0.019                                                | $6.56 \pm 0.19$                |
| 5     | 0.023                                                | $6.98 \pm 0.19$                |

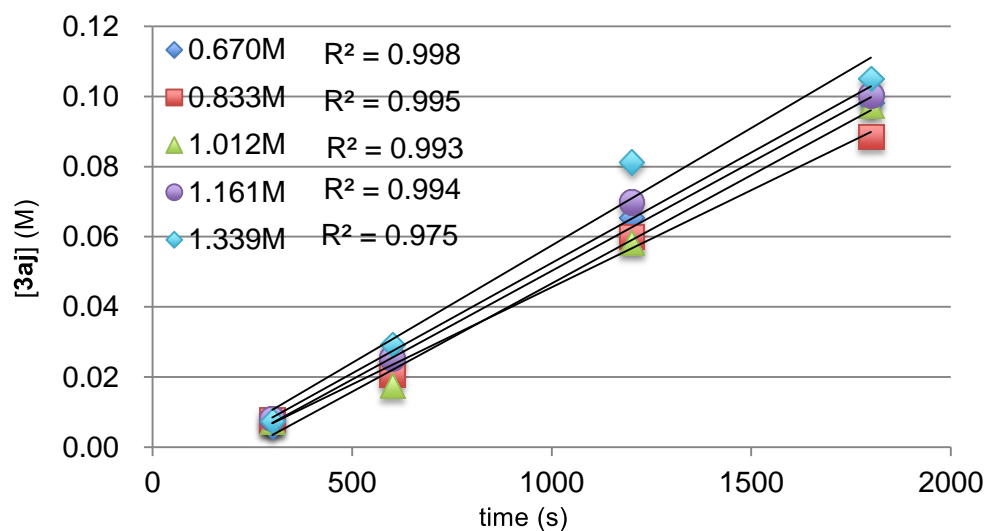

Fig. S10. Plot of product concentration against reaction time using 1,3-butadiene at 0.670 to 1.339 M.

**Table S7 Kinetics on 1,3-Butadiene**

| entry | initial concentration of 1,3-butadiene [M] | reaction rate [ $10^{-5}$ M/s] |
|-------|--------------------------------------------|--------------------------------|
| 1     | 0.670                                      | $6.19 \pm 0.21$                |
| 2     | 0.833                                      | $5.54 \pm 0.28$                |
| 3     | 1.012                                      | $6.17 \pm 0.37$                |
| 4     | 1.161                                      | $6.29 \pm 0.35$                |
| 5     | 1.339                                      | $6.69 \pm 0.77$                |



## 5-2. Activation parameters (Fig. 4)

The reactions using **2j** and **2m** were conducted between 30 °C and 50 °C, and time-course of the reactions was traced as shown in Figs. 4a and 4b. Under the conditions with a constant amount of Ni catalyst, the reaction rate obeys pseudo-first-order kinetics for **1a** with  $v = k[\mathbf{1a}][\text{NiBr}_2(\text{dme})] = k_{\text{obs}}[\mathbf{1a}]$ . The rate constants  $k_{\text{obs}}$  for Grignard reagents **2j** and **2m** were estimated by plotting  $\ln([\mathbf{1a}]/[\mathbf{1a}]_0)$  against reaction time as shown in Figs. S11 and S12.

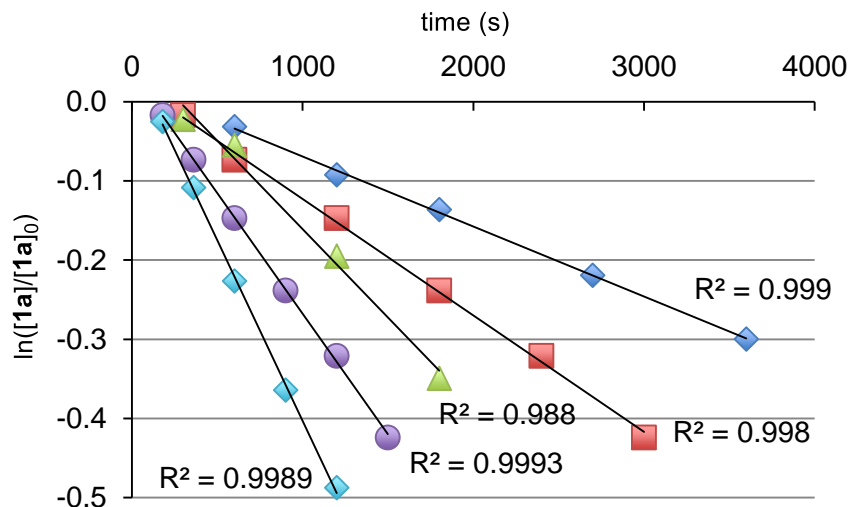

Fig. S11 (a) Time-course of the reaction of **1a** with **2j** at 30 °C (◆), 35 °C (■), 40 °C (▲), 45 °C (●), and 50 °C (◆).

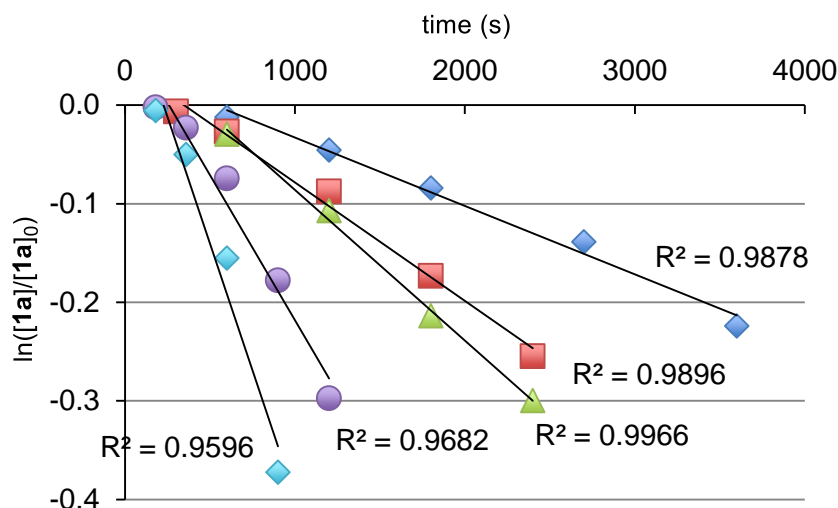

Fig. S12 Time-course of the reaction of **1a** with **2m** at 30 °C (◆), 35 °C (■), 40 °C (▲), 45 °C (●), and 50 °C (◆).

From the slope of these plots,  $k_{\text{obs}}$  at each reaction temperatures were determined, and the  $k$  ( $= k_{\text{obs}}[\text{NiBr}_2(\text{dme})]$ ) are summarized in Table S8. Eyring plot of these data are shown in Fig. 4c.

**Table S8 Kinetic Parameters of the Four-component Coupling Reaction using Grignard Reagents 2j and 2m at Different Temperatures**

| temp (°C) | $k_{\text{obs}} (10^{-4} \text{ s}^{-1})$ |               | $k (10^{-3} \text{ s}^{-1})$ |             |
|-----------|-------------------------------------------|---------------|------------------------------|-------------|
|           | <b>2j</b>                                 | <b>2m</b>     | <b>2j</b>                    | <b>2m</b>   |
| 30        | 0.885 ± 0.016                             | 0.695 ± 0.010 | 5.28 ± 0.10                  | 3.99 ± 0.06 |
| 35        | 1.47 ± 0.03                               | 1.20 ± 0.10   | 8.90 ± 0.20                  | 7.08 ± 0.60 |
| 40        | 2.23 ± 0.17                               | 1.53 ± 0.06   | 13.5 ± 1.1                   | 9.37 ± 0.39 |
| 45        | 3.25 ± 0.06                               | 2.94 ± 0.36   | 19.3 ± 0.4                   | 17.5 ± 2.1  |
| 50        | 4.56 ± 0.04                               | 5.14 ± 0.75   | 27.3 ± 0.3                   | 31.1 ± 4.5  |

### 5-3. Hammett plot regarding RDS (Section 3.6)

The reaction of *n*-OctF (**1a**) with aryl Grignard reagents having a methyl group at the *ortho*-position and various substituents at the *para*-position was conducted, and the obtained results are shown in Table S9.

**Table S9 Time-course of the Four-component Coupling Reaction using Various Aryl Grignard Reagents**

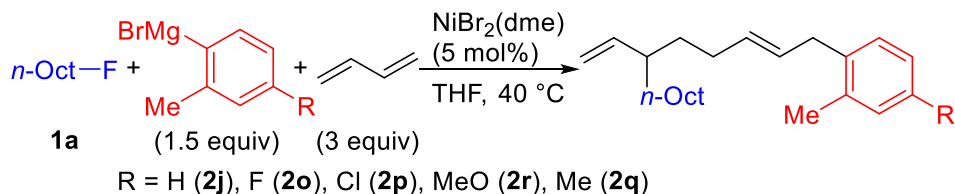

| R/time (s) | concentration of product <b>3</b> (M) |        |        |        |        |
|------------|---------------------------------------|--------|--------|--------|--------|
|            | 300                                   | 600    | 1200   | 1800   | 2400   |
| H          | 0.0073                                | 0.0176 | 0.0584 | 0.0973 | 0.1197 |
| Cl         | 0.0018                                | 0.0067 | 0.0221 | 0.0368 | 0.0533 |
| F          | 0.0030                                | 0.0122 | 0.0386 | 0.0594 | 0.0774 |
| OMe        | 0.0113                                | 0.0355 | 0.0765 | 0.1018 | 0.1281 |
| Me         | 0.0130                                | 0.0507 | 0.1019 | 0.1374 | 0.1617 |

$[\mathbf{1a}]_0$  and  $[\text{NiBr}_2(\text{dme})]_0 = 0.335 \text{ M}$  and  $1.65 \times 10^{-2} \text{ M}$  ( $\text{R} = \text{H}$ ),  $0.335 \text{ M}$  and  $1.65 \times 10^{-2} \text{ M}$  ( $\text{R} = \text{F}$ ),  $0.338 \text{ M}$  and  $1.69 \times 10^{-2} \text{ M}$  ( $\text{R} = \text{Cl}$ ),  $0.335 \text{ M}$  and  $1.65 \times 10^{-2} \text{ M}$  ( $\text{R} = \text{OMe}$ ), and  $0.335 \text{ M}$  and  $1.65 \times 10^{-2} \text{ M}$  ( $\text{R} = \text{Me}$ ).

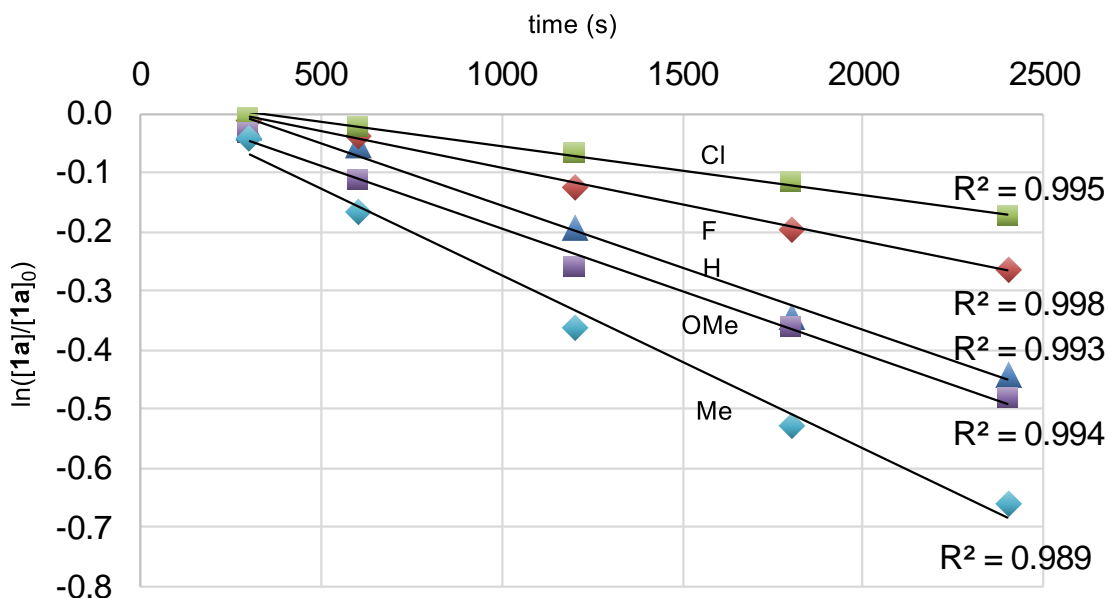

Fig. S13 Fitting the results to the pseudo-first-order line.

Under conditions using excess amounts of Grignard reagents and a constant amount of Ni catalyst, the reaction rate obeys pseudo-first-order kinetics for **1a** with  $v = k[\mathbf{1a}][\text{NiBr}_2(\text{dme})] = k_{\text{obs}}[\mathbf{1a}]$ . Fig. S13 shows plots of  $\ln([\mathbf{1a}]/[\mathbf{1a}]_0)$  against reaction time. From the slope of the plots,  $k_{\text{obs}}$  was obtained. The rate parameters and Yukawa-Tsuno's  $\sigma^0$  are summarized in Table S10. Hammett plot of these data is shown in Fig. 5.

**Table S10 Rate Constants and Hammett Constant  $\sigma^0$**

| R                                 | H               | Cl                | F               | OMe             | Me              |
|-----------------------------------|-----------------|-------------------|-----------------|-----------------|-----------------|
| $k_{\text{obs}}$ ( $10^{-4}$ M/s) | $2.10 \pm 0.10$ | $0.809 \pm 0.033$ | $1.23 \pm 0.03$ | $2.11 \pm 0.09$ | $2.94 \pm 0.18$ |
| $k$ ( $10^{-3}$ s $^{-1}$ )       | $12.7 \pm 0.6$  | $4.80 \pm 0.20$   | $7.47 \pm 0.19$ | $12.8 \pm 0.5$  | $17.8 \pm 1.1$  |
| $\log(k_X/k_H)$                   | 0               | -0.423            | -0.232          | +0.001          | +0.146          |
| $\sigma^0$                        | 0               | +0.281            | +0.212          | -0.100          | -0.124          |

#### 5-4. Competitive reactions (Section 3.8)

The competitive reactions shown in Table 7 were conducted, and the amounts of the product formed are plotted against reaction time as shown in Fig. S14, where the competitive reaction of *o*-TolMgBr (**2j**) and 4-fluoro-2-methylphenylmagnesium bromide (**2o**) was difficult to analyze by GC. Therefore, the relative reactivity of **2o** against **2j** was estimated by the competitive reaction with **2q** (Fig. S14b). The ratio of reaction constants,  $k_X/k_H$ , was directly calculated from the slope of the plots, and the obtained data are summarized in Table 7. Among substrate constants tested,  $\sigma_p^+$  showed the best linearity. Hammett plot of the data against  $\sigma_p^+$  is shown in Fig. 9.

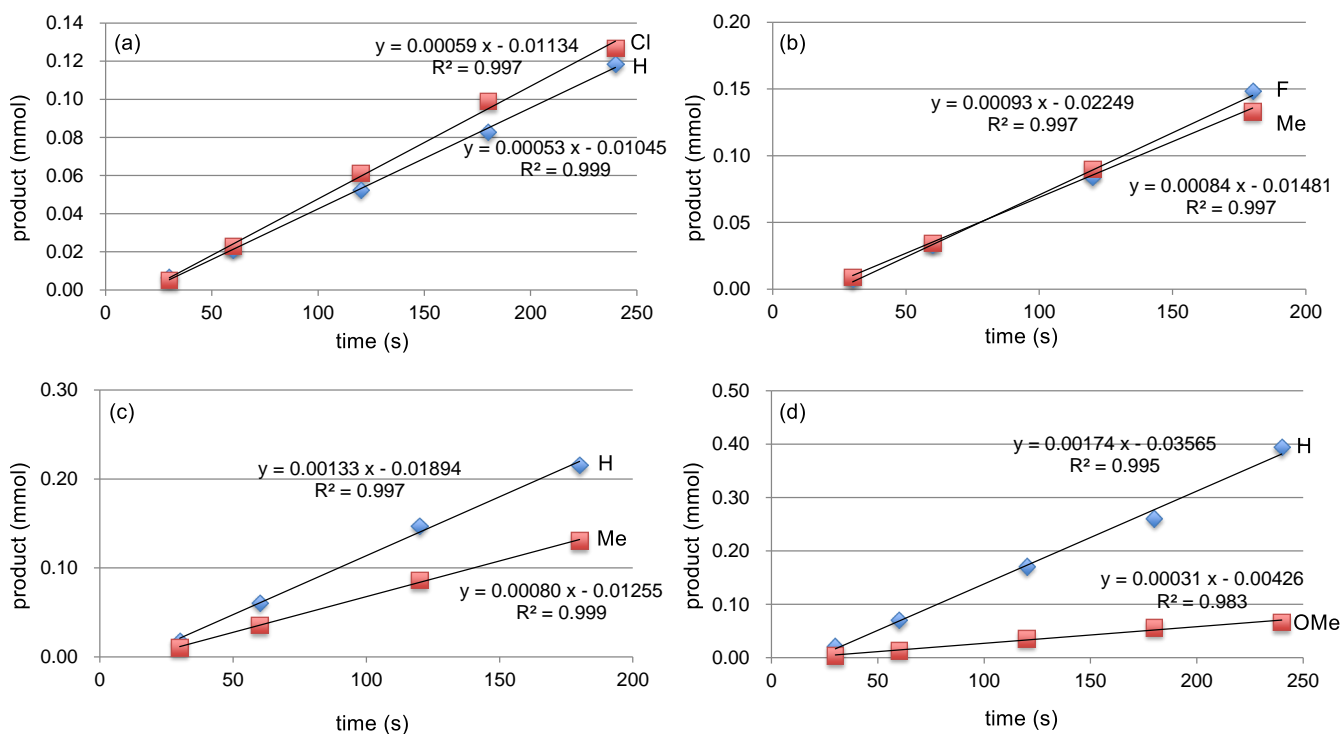

Fig. S14 Competitive reactions using two Grignard reagents. Time-course of the competitive reactions of **2j** and **2p** (a), **2o** and **2q** (b), **2j** and **2q** (c), and **2j** and **2r** (d).

## 6. Computational studies

### 6-1. Optimized structures

The optimized structures of the intermediates, transition states, and products in Fig. 10 are summarized in Fig. S15. For those of **TS3** and **TS10**, see Fig. 11.

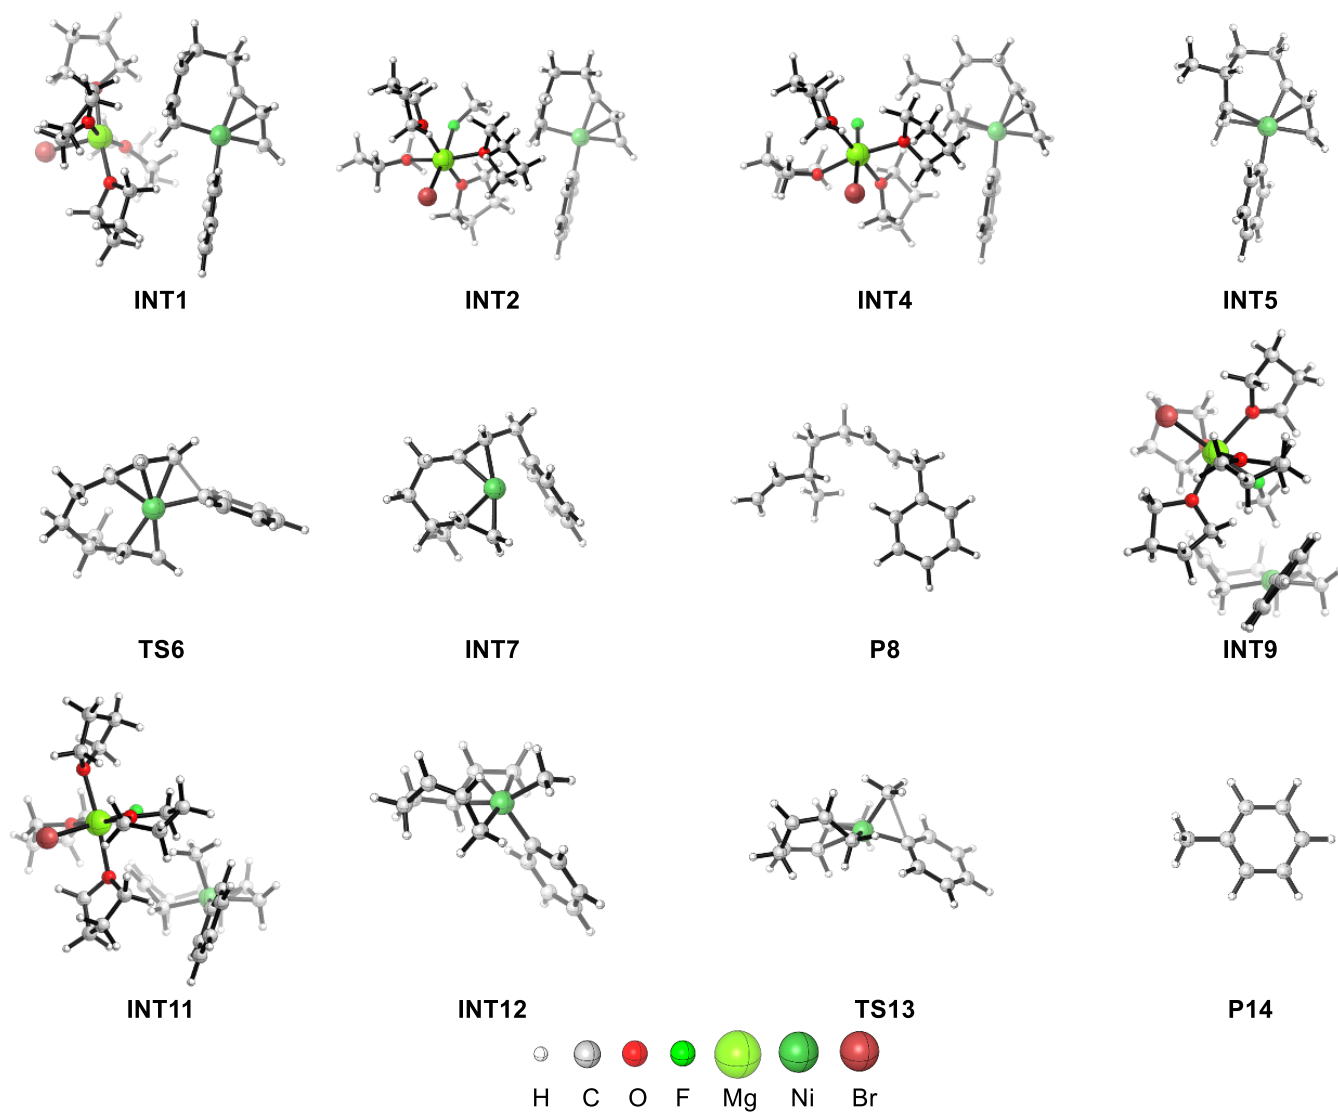

Fig. S15 Optimized structures of the intermediates, transition states, and products in Fig. 10.

## 6-2. Optimized structure and dihedral angle of INT1 with different aryl groups

The structures of the anionic part of **INT1** and their dihedral angles between the aryl and the coordination plane of the Ni are shown in Fig. S16. In the case of **INT1-2,6-dimethylphenyl**, the 2,6-dimethylphenyl group is orthogonally bound to Ni, in good agreement with the X-ray structure. In the case of **INT1-Ph**, the dihedral angle of the optimized structure is  $118.2^\circ$ , in sharp contrast to the crystal structure.<sup>S7</sup> NMR studies of the nickelate complexes bearing Ph and 2,6-dimethylphenyl groups at  $-20^\circ\text{C}$  show symmetric Ph group and unsymmetric 2,6-dimethylphenyl group (*vide supra*). These results indicate that the phenyl group easily rotates even at low temperatures. However, when methyl groups are introduced into the *ortho*-positions, the rotation becomes slow or restrained due to the steric interaction.

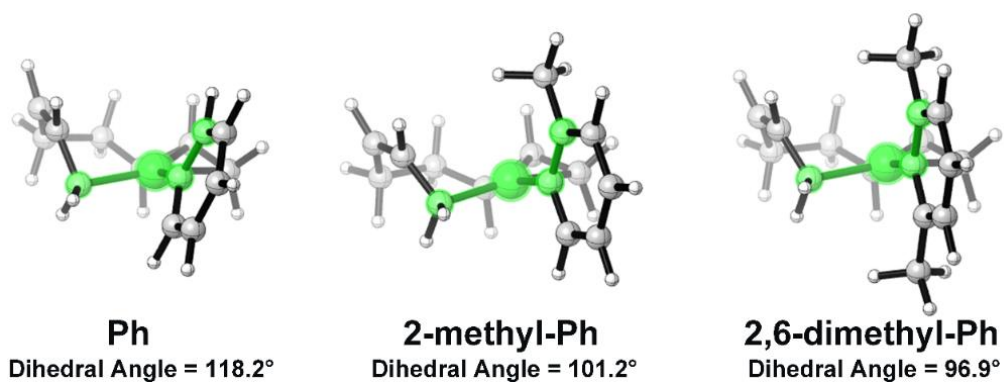

Fig. S16 Geometry of nickelate complexes having Ph (left), 2-methylphenyl (middle), and 2,6-dimethylphenyl (right) groups.

### 6-3. Rotation of aryl group in anionic Ni complexes

As mentioned above,  $^1\text{H}$  NMR of isolated anionic Ni complexes **11** (Ph) and **8** (2,6-dimethylphenyl) showed symmetric Ph and unsymmetric 2,6-dimethylphenyl groups at  $-20\text{ }^\circ\text{C}$ , respectively. These observations clearly indicate that the rotation of aryl ring is restrained by *ortho*-substituent(s). To evaluate rotation barrier of the anionic Ni complex having 2-methylphenyl group, we conducted theoretical calculation with the dihedral angle restriction. The initial structure with the dihedral angle of  $98.6^\circ$  is obtained directly from **INT1** structure by removing MgBr·4THF. Plot of relative energy against dihedral angle is shown in Fig. S17, revealing rotation barrier to be ca. 55 kJ/mol.

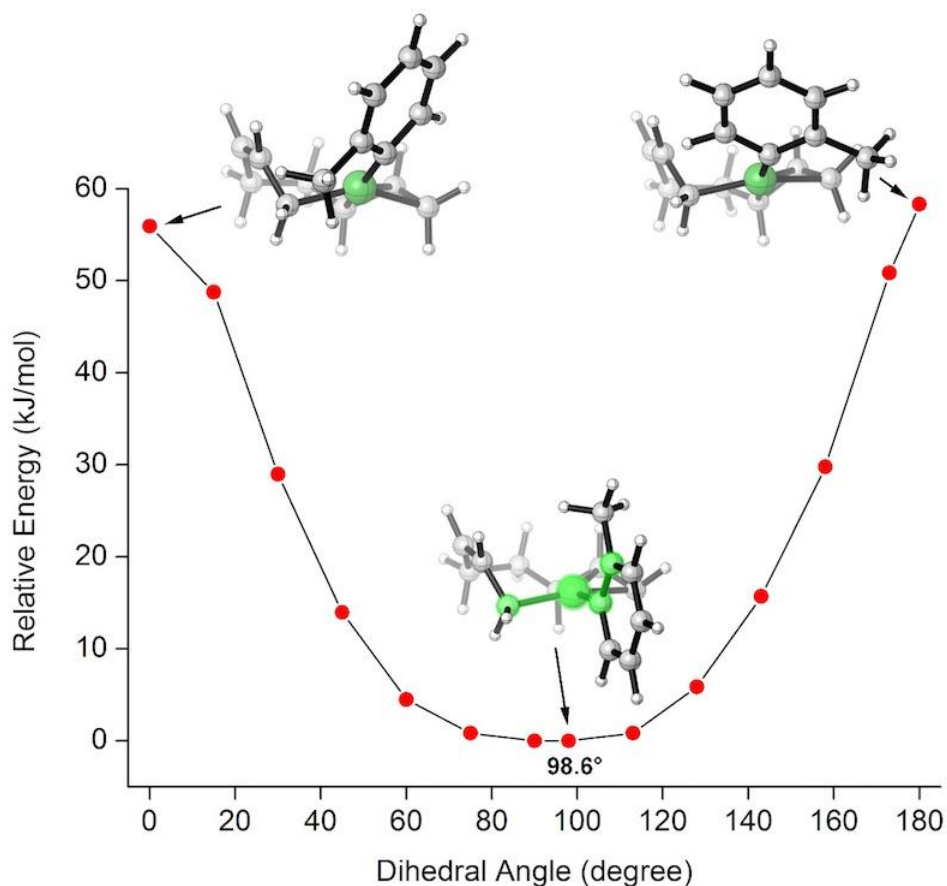

Fig. S17 Rotation barrier of anionic Ni complex having 2-methylphenyl moiety.

To confirm the rotation barrier, we further investigated by VT NMR. The anionic Ni complex having 2-methylphenyl group was synthesized by the reaction of  $\text{Ni}(\text{cod})_2$  with 2-methylphenyllithium reagent in the same way as the case of complexes **7** and **11**.  $^1\text{H}$  NMR spectrum of the isolated complex showed two signals arising from *ortho*-methyl group at 4.99 and 4.47 ppm at  $-20\text{ }^\circ\text{C}$  in  $\text{THF-}d_8$ .

Rotation rate was estimated by line-shape analysis of the  $^1\text{H}$  NMR spectra recorded at  $-60$  to  $-20\text{ }^\circ\text{C}$  using gNMR simulation software<sup>S8</sup>. The obtained rate constants are summarized in Table S11. Eyring



plot of the obtained data is shown in Fig. S18. From the slope and intercept,  $\Delta H^\ddagger$  and  $\Delta S^\ddagger$  are determined to be  $24.2 \pm 2.8$  kJ/mol and  $-104 \pm 12$  J/Kmol, respectively. Therefore, the rotation barrier  $\Delta G^\ddagger_{273}$  is  $52.7 \pm 6.0$  kJ/mol, the value which is consistent with the calculated value of 55 kJ/mol.

**Table S11 Rate Constants of the Rotation**

| Temp. (K)              | 213   | 223   | 233   | 243   | 253   |
|------------------------|-------|-------|-------|-------|-------|
| $k$ (s <sup>-1</sup> ) | 16.66 | 34.88 | 86.12 | 118.3 | 162.6 |

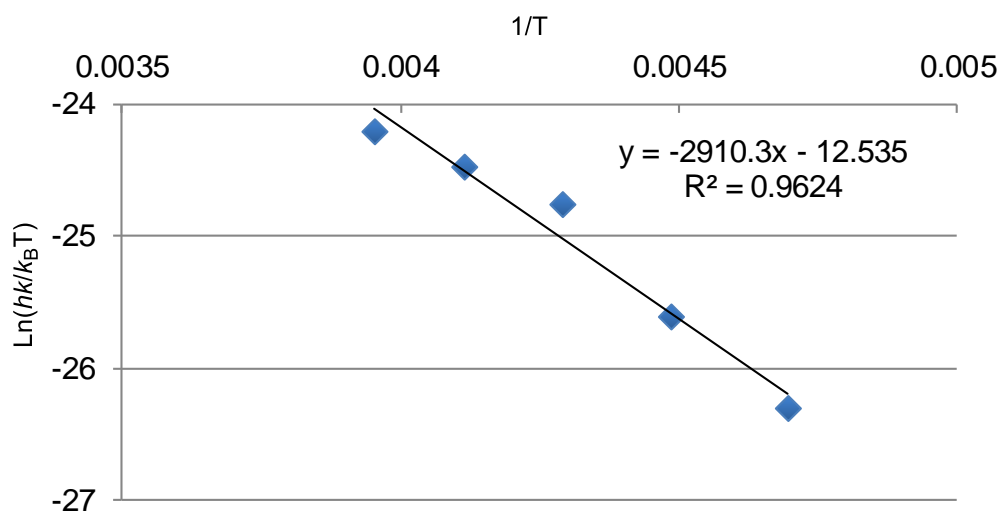

Fig. S18 Eyring plot of the rotation.

#### 6-4. Geometry of Ni complexes bearing 2-methylphenyl group

Because of the orthogonal orientation of the aryl group, Ni complex bearing 2-methylphenyl group has two possible geometries, in which the  $\sigma$ -allyl group and methyl group on the 2-methylphenyl group point in either the same (up) or opposite (down) directions. We thus calculated **TS3** and **TS10** with *n*-Pr-F for both geometries at M06/6-31G(d,p) level of theory, and the results are summarized in Fig. S19. In **TS3**, **TS3-2-methyl-up** is more favorable compared to **TS3-2-methyl-down**. In contrast, in **TS10**, **TS10-2-methyl-down** is favored rather than **TS10-2-methyl-up** due to the steric repulsion between *ortho*-methyl group and *n*-Pr moiety. It should be noted that **TS10-2-methyl-down** is the most favorable in energy, being inconsistent with the experimental results. In both **TS10-2-methyl-up** and **TS10-2-methyl-down**, a short C-H- $\pi$  interaction (ca. 2.5 Å) is found between THF and aryl ring, presumably contributing stabilization of these TSs. To avoid the C-H- $\pi$  interaction, we chosen a model containing the additional THF molecule between cationic moiety and the 2-methylphenyl ring as shown in Fig. S20. The addition of the THF molecule suppresses the short C-H- $\pi$  interaction and gives reasonable structure of TSs, where **TS3-2-methyl-up·THF** is the most energetically favorable in four

possible TSs.

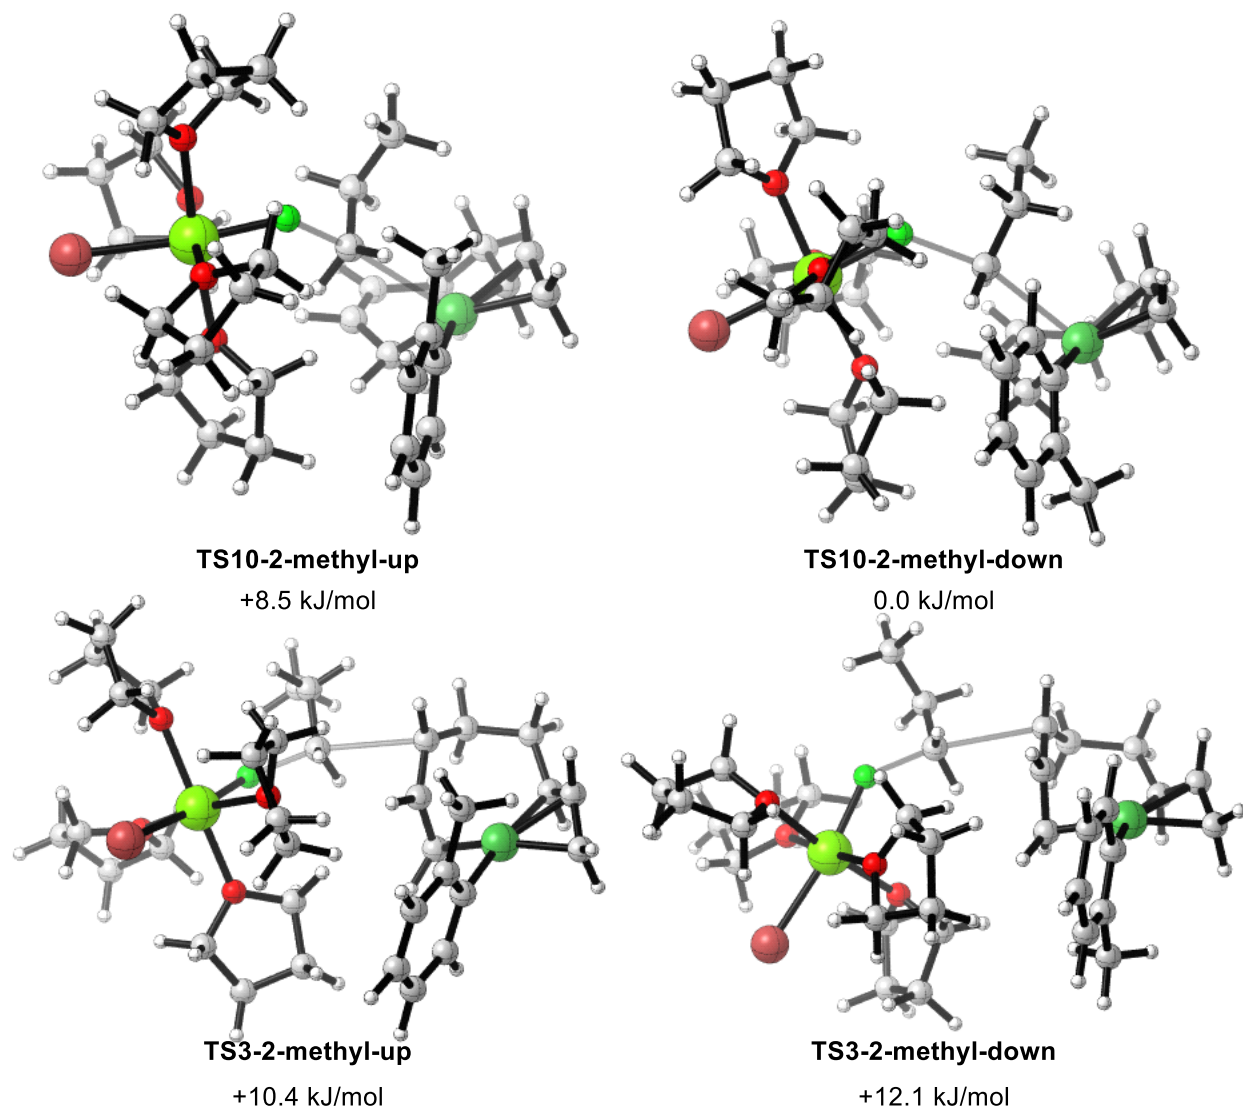

Fig. S19 Optimized geometries and corresponding relative energies of TSS and TS10 with up- and down-configurations at M06/6-31G(d,p) level of theory.

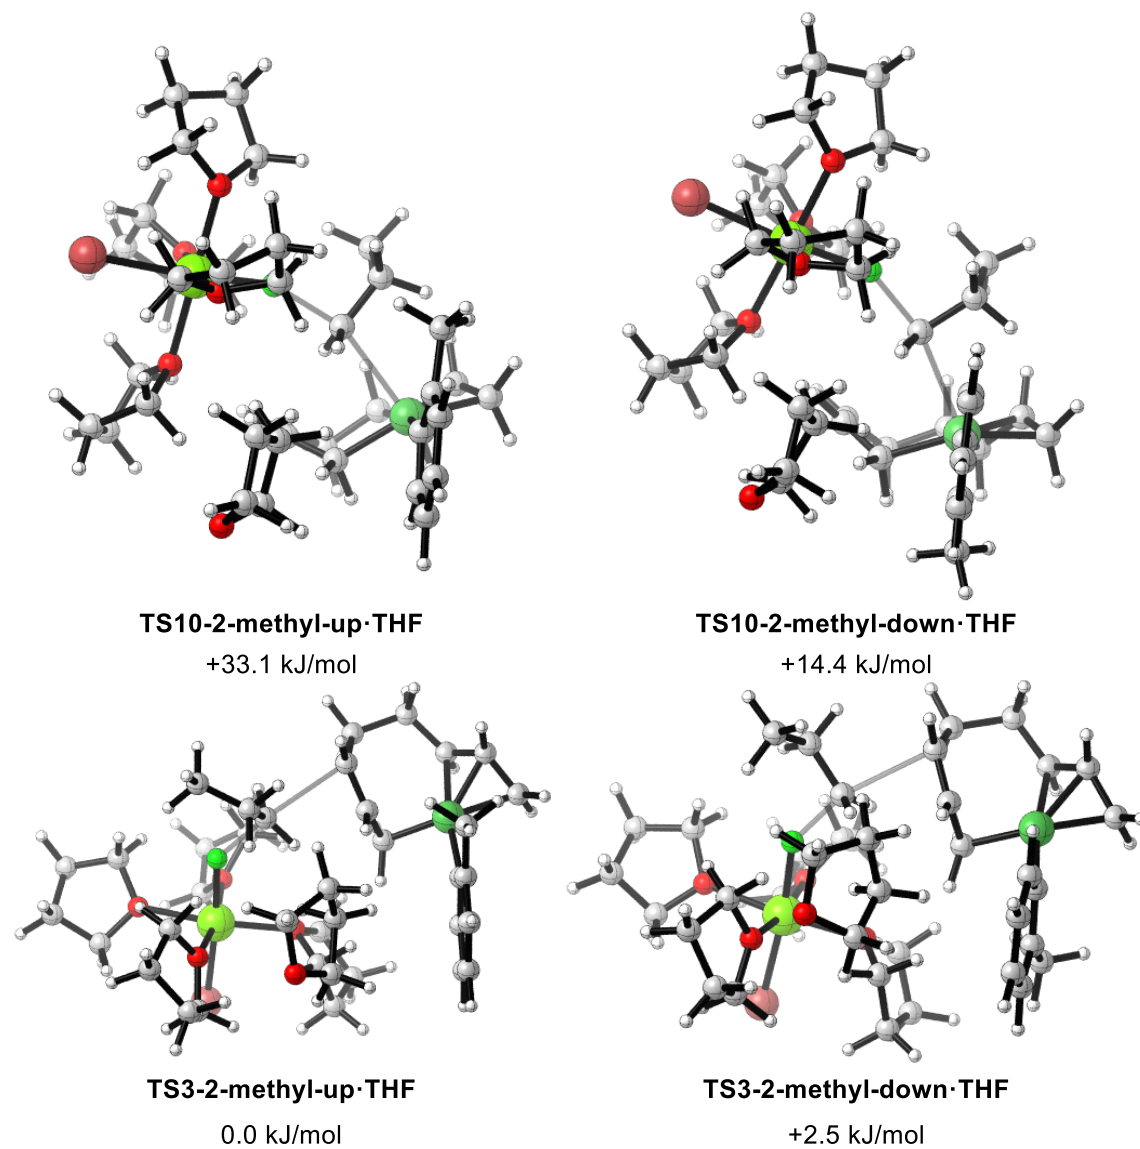

Fig. S20 Optimized geometries and corresponding relative energies of **TS3** and **TS10** containing the additional THF molecule between *o*-Tol group and the cation with up- and down-configurations at M06/6-31G(d,p) level of theory.

## 6-5. Structure differences in TS10

Table S12 summarizes important bond distances in **TS10** with various Grignard reagents and alkyl fluorides, e.g. in **TS10** with Ph and MeF, the C–F bond is 1.28 times longer than MeF (C–F = 1.379 Å), and the C–Ni bond is 1.28 times longer than **INT11** (C–Ni = 1.914 Å). The C–F and C–Ni distances in **TS10** with Ph and *n*-OctF are longer than those in **TS10** with MeF, where both bonds are 1.36 times and 1.35 times elongated, respectively. Although this step is the nucleophilic substitution of alkyl fluorides with anionic Ni center by the aid of the Mg cation, the details of the reaction mechanism of this step differs according to alkyl fluorides. In the case of MeF, the reaction proceeds through pure S<sub>N</sub>2 mechanism. On the other hand, the process of *n*-OctF proceeds through S<sub>N</sub>2 mechanism with a somewhat S<sub>N</sub>1 character. This difference may arise from the stability of the carbocation, where methyl cation is unfavorable than *n*-Oct cation. Therefore, the C–F and C–Ni distances of **TS10** with MeF are shorter than that of **TS10** with *n*-OctF.

When methyl group(s) was introduced into the *ortho*-positions, both C–F and C–Ni bonds are elongated probably due to the steric repulsion, and the elongation of these bond distances is more significant in the case of *n*-OctF. For instance, the change of the sum of C–F and C–Ni bonds is 0.112 Å for *n*-Oct but only 0.051 Å for MeF by changing Ph to 2,6-dimethylphenyl. This result could be explained by the stability of the carbocation as mentioned above. In the case of MeF, the corresponding Me cation is relatively unstable and therefore elongation of C–F and C–Ni bond in **TS10** is impermissible, resulting in the increase of the energy barrier by steric repulsions. On the other hand, the steric repulsion is loosened by elongation of these bonds in the case of **TS10** with *n*-OctF. Therefore, these TSs with *n*-OctF are not sensitive to steric hindrances compared to TSs with MeF.

**Table S12 Important distances (in Å) and energy barrier (in kJ/mol) in TS10 with three different Grignard reagents and two alkyl fluorides**

| alkyl fluoride<br>Grignard reagent | MeF   |       |                         |                     | <i>n</i> -OctF |       |                         |                     |
|------------------------------------|-------|-------|-------------------------|---------------------|----------------|-------|-------------------------|---------------------|
|                                    | C–F   | C–Ni  | <i>sum</i> <sup>a</sup> | $\Delta G^\ddagger$ | C–F            | C–Ni  | <i>sum</i> <sup>a</sup> | $\Delta G^\ddagger$ |
| Ph                                 | 1.763 | 2.457 | 4.220                   | 65.8                | 1.882          | 2.590 | 4.472                   | 80.2                |
| 2-methylphenyl                     | 1.771 | 2.461 | 4.232                   | 116.3               | 1.920          | 2.602 | 4.522                   | 106.9               |
| 2,6-dimethylphenyl                 | 1.785 | 2.486 | 4.271                   | 134.2               | 1.936          | 2.648 | 4.584                   | 117.5               |

<sup>a</sup>Sum of C–F and C–Ni bonds

NBO analysis of **TS10** with PhMgBr and MeF or *n*-OctF is shown in Table S13. Among key atoms in the bond cleavage and formation, the NBO charge of the reacting carbon is drastically altered by changing MeF to *n*-OctF (from –0.137 to +0.101). This large difference in NBO charge clearly supports the above mentioned difference in mechanism and the S<sub>N</sub>1 character of **TS10** with *n*-OctF. The relatively

small difference of Ni in NBO charge is due to the  $\pi$ -allyl group in *trans*-position (*vide infra*).

**Table 13 NBO atomic charges (|e|) of TS10-Ph with Me-F and *n*-Oct-F**

| Alkyl fluoride | Mg     | F      | C             | Ni     |
|----------------|--------|--------|---------------|--------|
| MeF            | +1.791 | -0.679 | <b>-0.137</b> | +0.219 |
| <i>n</i> -OctF | +1.799 | -0.747 | <b>+0.101</b> | +0.231 |

### 6-6. NBO charge of nickelate complexes

NBO charges of nickelate complexes having Me on the *ortho*-position and various substituents on the *para*-position of Ar are summarized in Table S14. It should be noted that electronic effects of the substituents affect the NBO charge of the  $\gamma$ -carbon in the  $\sigma$ -allyl group. However, that of Ni atom is constant in all cases. This is probably due to the electronic transfer between Ni and the  $\pi$ -allyl moiety at the *trans*-position. Indeed, the total NBO charge of Ni and the  $\pi$ -allyl depends on the substituents.

**Table S14. Corresponding Charges ( $|e|$ ) of  $\gamma$ -Carbon of  $\sigma$ -Allyl,  $\pi$ -Allyl, and Ni Center, and the Sum of Charges on Allyl Carbons C1, C2, and C3 coordinated to Ni center**

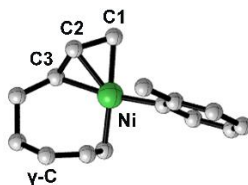

| R                          | H      | F      | Cl     | Me     | OMe    | NMe <sub>2</sub> |
|----------------------------|--------|--------|--------|--------|--------|------------------|
| $\gamma$ -C                | -0.388 | -0.387 | -0.376 | -0.390 | -0.388 | -0.390           |
| Ni                         | 0.233  | 0.232  | 0.233  | 0.233  | 0.233  | 0.232            |
| $\pi$ -allyl <sup>a</sup>  | -1.051 | -1.047 | -1.048 | -1.053 | -1.052 | -1.053           |
| sum of Ni and $\pi$ -allyl | -0.818 | -0.815 | -0.815 | -0.820 | -0.819 | -0.820           |

<sup>a</sup>Sum of NBO charges on C1, C2, and C3.

## Materials and Methods

Nuclear magnetic resonance ( $^1\text{H}$  NMR,  $^{13}\text{C}$  NMR, and  $^{19}\text{F}$  NMR) spectra were recorded on a JEOL JNM-Alice 400 spectrometer operating at 400 MHz ( $^1\text{H}$  NMR), 100 MHz ( $^{13}\text{C}$  NMR) and 376 MHz ( $^{19}\text{F}$  NMR) in 5-mm NMR tubes. All  $^1\text{H}$  NMR chemical shifts were reported in ppm relative to an internal reference tetramethylsilane at  $\delta$  0.00 or residual protonated solvent (THF- $d_7$  at  $\delta$  3.53). All  $^{13}\text{C}$  NMR chemical shifts were reported in ppm relative to the carbon of chloroform- $d_1$  as  $\delta$  77.00 and THF- $d_8$  as  $\delta$  66.50. The  $^{19}\text{F}$  NMR chemical shifts were reported in ppm relative to external references of  $\alpha,\alpha,\alpha$ -trifluorotoluene as  $\delta$  -63.90. HPLC separations were performed on a recycling preparative HPLC (Shimadzu Prominence) equipped with Shodex K2001 and 2002 columns (GPC) using  $\text{CHCl}_3$  as an eluent. GC analyses were performed on a Shimadzu GC-2014 instrument equipped with a GL Sciences InertCap 5 capillary column (I.D. 0.25 mm, Length 30 m,  $d_f$  0.25  $\mu\text{m}$ ) using dodecane as an internal standard. Conventional and high resolution mass spectra were recorded with a JEOL JMS-DX303HF spectrometer (EI and CI) with a double-focusing magnetic sector mass instrument or JEOL JMS-T100TD (DART and ESI) with a time-of-flight mass instrument. Melting points were measured using Stanford Research Systems OptiMelt MPA 100 with a glass capillary. Elemental analyses were performed on JM10 (J-Science Lab Co. Ltd.).

All manipulations involving air- and moisture-sensitive compounds were carried out by the standard Schlenk techniques under a nitrogen atmosphere unless otherwise noted. Dehydrated THF and  $\text{Et}_2\text{O}$  were purchased from Kanto Chemical Company and purified by SPS<sup>S9</sup> prior to use. Dehydrated toluene and pentane were purchased from Wako Pure Chemical Industries and used as received. THF- $d_8$  and 1,2-dimethoxyethane (DME) were distilled from sodium benzophenone ketyl. 12-Crown-4 was distilled from sodium metal. Grignard reagents **2f**, **2k**, **2l**, and **2m** were prepared by a standard procedure. Other THF solutions of Grignard reagents were purchased from Aldrich or TCI. A cyclohexane/ether solution of phenyllithium was purchased from Kanto. Ether solutions of 2,6-dimethylphenyllithium and 2-methylphenyllithium were prepared by the reaction of the corresponding bromide with lithium under an Ar atmosphere. These organomagnesium and lithium reagents were used after titration using  $\text{I}_2$ .  $\text{NiBr}_2(\text{dme})$  (Aldrich),  $\text{Ni}(\text{cod})_2$  (Kanto), 1,3-butadiene (TCI), and all other commercially available reagents were used as received.

## Synthesis of Substrates

### 2-(6-Fluorohexan-1-yloxy)tetrahydropyran (1b)<sup>S10</sup>

A mixture of 6-chloro-1-hexanol (5.43 g, 39.7 mmol) and *n*-Bu<sub>4</sub>N•F(H<sub>2</sub>O)<sub>5</sub> (27.10 g, 77.1 mmol) was stirred at 80 °C for 7 h. After addition of H<sub>2</sub>O (20 mL), products were extracted by EtOAc for three times. The combined organic layer was dried over Na<sub>2</sub>SO<sub>4</sub>, through a short pad of silica gel, and concentrated to give an orange oil. The fluorinated product was purified by distillation (bp = 82–85 °C, 1.1 kPa) to give 6-fluoro-1-hexanol as a colorless oil (2.97 g, 24.7 mmol, 62%): <sup>1</sup>H NMR (400 MHz, CDCl<sub>3</sub>): δ 4.45 (dt, *J* = 47.2, 6.0 Hz, 2H, FCH<sub>2</sub>), 3.63 (t, *J* = 7.2 Hz, 2H, CH<sub>2</sub>OH), 2.15 (br s, 1H, OH), 1.75–1.66 (m, 2H, methylene), 1.58 (quin, *J* = 6.8 Hz, 2H, methylene), 1.46–1.39 (m, 4H, methylene); <sup>13</sup>C NMR (100 MHz, CDCl<sub>3</sub>): δ 84.0 (d, *J* = 163.0 Hz), 62.5, 32.4 (d, *J* = 5.4 Hz), 30.2 (d, *J* = 19.1 Hz), 25.3, 24.9 (d, *J* = 5.7 Hz); <sup>19</sup>F NMR (376 MHz, CDCl<sub>3</sub>): δ –218.1 (sept, *J* = 23.3 Hz); MS (CI): *m/z* (relative intensity, %): 121 ([M+H]<sup>+</sup>, 100), 103 (70), 83 (17); HRMS (CI) *m/z* [M+H]<sup>+</sup> Calcd for C<sub>6</sub>H<sub>14</sub>FO 121.1029; Found 121.1028.

To a solution of 6-fluoro-1-hexanol (1.20 g, 10.0 mmol), pyridinium *p*-toluenesulfonate (53.4 mg, 2 mol%), and CH<sub>2</sub>Cl<sub>2</sub> (10 mL) was added dihydropyran (1.08 g, 12.8 mmol) at rt. After stirring at rt for 16 h, the reaction mixture was diluted with EtOAc (200 mL) and washed with H<sub>2</sub>O (50 mL x 2), 1N HCl aq. (50 mL), sat. NaHCO<sub>3</sub> aq. (50 mL), and brine (50 mL). The organic layer was dried over Na<sub>2</sub>SO<sub>4</sub> and concentrated. The fluorinated product was purified by silica gel column chromatography (hexane/EtOAc = 90/10) to give the title compound as a pale yellow colorless oil (2.03 g, 9.95 mmol, 92%): <sup>1</sup>H NMR (400 MHz, CDCl<sub>3</sub>): δ 4.50 (q, *J* = 2.4 Hz, 1H, OCHO), 4.36 (dt, *J* = 47.6, 6.4 Hz, 2H, FCH<sub>2</sub>), 3.82–3.77 (m, 1H, OCH<sub>2</sub>), 3.67 (dt, *J* = 9.6, 6.8 Hz, 1H, OCH<sub>2</sub>), 3.46–3.40 (m, 1H, OCH<sub>2</sub>), 3.33 (dt, *J* = 9.6, 6.8 Hz, 1H, OCH<sub>2</sub>), 1.88–1.70 (m, 1H, methylene), 1.68–1.43 (m, 9H, methylene), 1.37–1.33 (m, 4H, methylene); <sup>13</sup>C NMR (100 MHz, CDCl<sub>3</sub>): δ 98.8, 83.9 (d, *J* = 163.0 Hz), 67.3, 62.2, 30.7, 30.3, 30.1, 29.5, 25.8, 25.4, 25.0, 24.9, 19.6; <sup>19</sup>F NMR (376 MHz, CDCl<sub>3</sub>): δ –218.2 (sept, *J* = 23.3 Hz); MS (DART) *m/z* (relative intensity, %): 205 ([M]<sup>+</sup>, 15), 203 (75), 195 (100), 187 (28); HRMS (DART) *m/z* [M+H]<sup>+</sup> Calcd for C<sub>11</sub>H<sub>22</sub>FO<sub>2</sub> 205.1604; Found 205.1606.

### 1-*tert*-Butyldimethylsiloxy-6-fluorohexane (1c)<sup>S1</sup>

To a solution of 6-fluoro-1-hexanol (1.21 g, 10.1 mmol), triethylamine (1 mL), and DMF (5 mL) was added *tert*-butyldimethylsilyl chloride (TBDMSCl, 1.81 g, 12.0 mmol) at 0 °C. After stirring at rt for 12 h, the reaction mixture was diluted with hexane (200 mL) and washed with H<sub>2</sub>O (50 mL x 3) and brine (50 mL). The organic layer was dried over Na<sub>2</sub>SO<sub>4</sub> and concentrated. The fluorinated product was purified by silica gel column chromatography (hexane/EtOAc = 100/0 to 80/20) to give the title compound as a colorless oil (1.76 g, 7.52 mmol, 75%): <sup>1</sup>H NMR (400 MHz, CDCl<sub>3</sub>): δ 4.37 (dt, *J* = 47.2, 6.0 Hz, 2H, FCH<sub>2</sub>), 3.54 (t, *J* = 6.8 Hz, 2H, CH<sub>2</sub>CO), 1.69–1.58 (m, 2H, methylene), 1.46 (quin, *J* = 6.8 Hz, 2H, methylene), 1.36–1.30 (m, 4H, methylene), 0.83 (s, 9H, *t*-Bu), –0.02 (s, 6H, Me); <sup>13</sup>C NMR (100



MHz, CDCl<sub>3</sub>):  $\delta$  84.1 (d,  $J = 163.1$  Hz), 63.1, 32.7, 30.4 (d,  $J = 19.1$  Hz), 25.9, 25.5, 25.0 (d,  $J = 4.8$  Hz), 18.3,  $-5.3$ : <sup>19</sup>F NMR (376 MHz, CDCl<sub>3</sub>):  $\delta$   $-218.0$  (sept,  $J = 23.3$  Hz): MS (CI)  $m/z$  (relative intensity, %): 235 ([M+H]<sup>+</sup>, 100): HRMS (CI)  $m/z$  [M+H]<sup>+</sup> Calcd for C<sub>12</sub>H<sub>28</sub>FOSi 235.1893; Found 235.1896.

### 2-(3-Fluoropropyl)thiophene (1d)<sup>S10</sup>

To a solution of thiophene (3.31, 39.4 mmol) in THF (20 mL) was added *n*-BuLi (1.6 M in hexane, 27.5 mL, 44.0 mmol) at 0 °C and the mixture was stirred at the same temperature for 1 h. To the resulting mixture was added 1,3-dibromopropane (8.2 mL, 80.4 mmol) at  $-18$  °C and the mixture was allowed to warm to rt. After stirring for 7 h at rt, the reaction mixture was concentrated and quenched by addition of H<sub>2</sub>O. The product was extracted with Et<sub>2</sub>O for three times. The combined organic layer was dried over Na<sub>2</sub>SO<sub>4</sub> and concentrated and the product was purified by distillation (bp = 92-94 °C, 0.4 kPa) to give 2-(3-bromopropyl)thiophene as a colorless oil (4.63 g, 22.6 mmol, 57%).

A mixture of 2-(3-bromopropyl)thiophene (2.05 g, 10.0 mmol) and *n*-Bu<sub>4</sub>N<sup>+</sup>•F(H<sub>2</sub>O)<sub>5</sub> (6.91 g, 19.4 mmol) was stirred at 80 °C for 8 h. After addition of H<sub>2</sub>O (10 mL), products were extracted by EtOAc for three times. The combined organic layer was dried over Na<sub>2</sub>SO<sub>4</sub>, through a short pad of silica gel, and concentrated to give an orange oil. The fluorinated product was purified by silica gel column chromatography (hexane/EtOAc = 100/0 to 80/20) to give the title compound as a colorless oil (0.87 g, 6.03 mmol, 60%): <sup>1</sup>H NMR (400 MHz, CDCl<sub>3</sub>):  $\delta$  7.13 (dd,  $J = 5.2, 1.2$  Hz, 1H, *thiophene*), 6.93 (dd,  $J = 5.2, 3.2$  Hz, 1H, *thiophene*), 6.82 (dd,  $J = 3.2, 1.2$  Hz, 1H, *thiophene*), 4.48 (dt,  $J = 47.2, 6.0$  Hz, 2H, FCH<sub>2</sub>), 2.98 (t,  $J = 7.6$  Hz, 2H, FCH<sub>2</sub>CH<sub>2</sub>CH<sub>2</sub>), 2.13–1.99 (m, 2H, *methylene*); <sup>13</sup>C NMR (100 MHz, CDCl<sub>3</sub>):  $\delta$  143.7, 126.8, 124.6, 123.3, 82.8 (d,  $J = 164.0$  Hz), 32.3 (d,  $J = 19.1$  Hz), 25.4 (d,  $J = 5.7$  Hz); <sup>19</sup>F NMR (376 MHz, CDCl<sub>3</sub>):  $\delta$   $-220.6$  (sept,  $J = 23.3$  Hz); MS (EI)  $m/z$  (relative intensity, %): 144 ([M]<sup>+</sup>, 63), 111 (4), 97 (100); HRMS (EI)  $m/z$  [M]<sup>+</sup> Calcd for C<sub>7</sub>H<sub>9</sub>FS 144.0409; Found 144.0411.

### 4-Fluorophenyl 3-fluoropropyl ether (1e)<sup>S10</sup>

To a solution of *p*-fluorophenol (2.28 g, 20.4 mmol) in THF (20 mL) was added NaH (60% in mineral oil, 1.0 g, 25 mmol) at 0 °C followed by addition of 1,3-dichloropropane (4.52 g, 40.0 mmol). The resulting mixture was refluxed for 2 days. However, reaction was not completed, therefore solvent was changed to DMF (5 mL) and reaction was continued at 100 °C for 40 h. The reaction mixture was cooled to ambient temperature, diluted with Et<sub>2</sub>O and washed with water for three times and brine. The organic layer was dried over Na<sub>2</sub>SO<sub>4</sub> and concentrated. Purification by silica gel column chromatography (hexane/EtOAc = 100/0 to 95/5) gave 3-chloropropyl 4-fluorophenyl ether as a colorless oil (2.35 g, 13.6 mmol, 67%): <sup>1</sup>H NMR (400 MHz, CDCl<sub>3</sub>):  $\delta$  6.90 (dd,  $J = 9.6, 7.6$  Hz, 2H, Ar), 6.78–6.75 (m, 2H, Ar), 3.99 (t,  $J = 6.0$  Hz, 2H, OCH<sub>2</sub>), 3.67 (t,  $J = 6.4$  Hz, 2H, ClCH<sub>2</sub>), 2.14 (quin,  $J = 6.0$  Hz, 2H, *methylene*); <sup>13</sup>C NMR (100 MHz, CDCl<sub>3</sub>):  $\delta$  158.5, 156.1, 154.8, 115.9, 115.7, 115.5, 115.4,

64.8, 41.4, 32.2;  $^{19}\text{F}$  NMR (376 MHz,  $\text{CDCl}_3$ ):  $\delta$  -123.7 (s); MS (DART):  $m/z$  188 ( $[\text{M}]^+$ ).

A mixture of the chloride (1.88 g, 10.0 mmol) and  $n\text{-Bu}_4\text{N}\cdot\text{F}(\text{H}_2\text{O})_5$  (6.90 g, 19.6 mmol) was stirred at 80 °C for 8 h. After addition of  $\text{H}_2\text{O}$  (10 mL), products were extracted by EtOAc for three times. The combined organic layer was dried over  $\text{Na}_2\text{SO}_4$ , filtrated through a short pad of silica gel, and concentrated to give an orange oil. The fluorinated product was purified silica gel column chromatography (hexane/EtOAc = 100/0 to 90/10) to give the title compound as a colorless oil (1.317 g, 7.65 mmol, 77%):  $^1\text{H}$  NMR (400 MHz,  $\text{CDCl}_3$ ):  $\delta$  6.90 (dd,  $J = 9.6, 7.6$  Hz, 2H, *Ar*), 6.78–6.75 (m, 2H, *Ar*), 3.99 (t,  $J = 6.0$  Hz, 2H,  $\text{OCH}_2$ ), 3.67 (t,  $J = 6.4$  Hz, 2H,  $\text{ClCH}_2$ ), 2.14 (quin,  $J = 6.0$  Hz, 2H, *methylene*);  $^{13}\text{C}$  NMR (100 MHz,  $\text{CDCl}_3$ ):  $\delta$  158.4, 156.1, 154.9, 115.9, 115.7, 115.43, 115.36, 80.6 (d,  $J = 163.1$  Hz), 64.1 (d,  $J = 4.7$  Hz), 30.4 (d,  $J = 20.0$  Hz);  $^{19}\text{F}$  NMR (376 MHz,  $\text{CDCl}_3$ ):  $\delta$  -123.9 (s, 1F), -222.2 (sept,  $J = 22.9$  Hz, 1F); MS (EI)  $m/z$  (relative intensity, %): 172 ( $[\text{M}]^+$ , 38), 112 (100); HRMS (EI)  $m/z$   $[\text{M}]^+$  Calcd for  $\text{C}_9\text{H}_{10}\text{F}_2\text{O}$  172.0700; Found 172.0699.

#### 4-Chlorophenyl 3-fluoropropyl ether (1f)<sup>S10</sup>

To a solution of *p*-chlorophenol (2.59 g, 20.2 mmol) in THF (20 mL) was added NaH (60% in mineral oil, 1.0 g, 25 mmol) at 0 °C followed by addition of 1,3-dichloropropane (4.52 g, 40.0 mmol). The resulting mixture was refluxed for 2 days. Since reaction was not completed, solvent was changed to DMF (5 mL) and reaction was continued at 100 °C for 40 h. The reaction mixture was cooled to ambient temperature, diluted with  $\text{Et}_2\text{O}$  and washed with water for three times and brine. The organic layer was dried over  $\text{Na}_2\text{SO}_4$  and concentrated. Purification by silica gel column chromatography (hexane/EtOAc = 100/0 to 95/5) gave 4-chlorophenyl 3-chloropropyl ether as a white solid (2.27 g, 12.0 mmol, 60%):  $^1\text{H}$  NMR (400 MHz,  $\text{CDCl}_3$ ):  $\delta$  7.15 (d,  $J = 9.2$  Hz, 2H, *Ar*), 6.75 (d,  $J = 9.2$  Hz, 2H, *Ar*), 4.00 (t,  $J = 6.0$  Hz, 2H,  $\text{OCH}_2$ ), 3.66 (t,  $J = 6.4$  Hz, 2H,  $\text{ClCH}_2$ ), 2.14 (quin,  $J = 6.4$  Hz, 2H, *methylene*);  $^{13}\text{C}$  NMR (100 MHz,  $\text{CDCl}_3$ ):  $\delta$  157.3, 129.3, 125.7, 115.7, 64.5, 41.4, 32.1; MS (DART):  $m/z$  205 ( $[\text{M}]^+$ ).

A mixture of the chloride (2.022 g, 9.86 mmol) and  $n\text{-Bu}_4\text{N}\cdot\text{F}(\text{H}_2\text{O})_5$  (6.94 g, 19.7 mmol) was stirred at 80 °C for 8 h. After addition of  $\text{H}_2\text{O}$  (10 mL), products were extracted by EtOAc for three times. The combined organic layer was dried over  $\text{Na}_2\text{SO}_4$ , through a short pad of silica gel, and concentrated to give an orange oil. The fluorinated product was purified silica gel column chromatography (hexane/EtOAc = 100/0 to 90/10) to give the title compound as a colorless oil (1.138 g, 6.03 mmol, 61%):  $^1\text{H}$  NMR (400 MHz,  $\text{CDCl}_3$ ):  $\delta$  7.15 (d,  $J = 8.8$  Hz, 2H, *Ar*), 6.74 (d,  $J = 8.8$  Hz, 2H, *Ar*), 4.55 (dt,  $J = 46.8, 6.0$  Hz, 2H,  $\text{FCH}_2$ ), 3.97 (t,  $J = 6.0$  Hz, 2H,  $\text{OCH}_2$ ), 2.07 (d,quin,  $J = 26.0, 6.0$  Hz, 2H, *methylene*);  $^{13}\text{C}$  NMR (100 MHz,  $\text{CDCl}_3$ ):  $\delta$  157.3, 129.3, 125.6, 115.7, 80.5 (d,  $J = 164.0$  Hz), 63.7 (d,  $J = 5.7$  Hz), 30.3 (d,  $J = 20.1$  Hz);  $^{19}\text{F}$  NMR (376 MHz,  $\text{CDCl}_3$ ):  $\delta$  -222.2 (sept,  $J = 22.9$  Hz); MS (EI)  $m/z$  (relative intensity, %): 188 ( $[\text{M}]^+$ , 33), 130 (32), 128 (100); HRMS (EI)  $m/z$   $[\text{M}]^+$  Calcd for  $\text{C}_9\text{H}_{10}\text{ClFO}$  188.0404; Found 188.0404.

#### 4-(2-Fluoroethyl)-1-tosylpiperidine (1g)<sup>S10</sup>

To a solution of piperidineethanol (2.550 g, 19.74 mmol) and Et<sub>3</sub>N (4.0 mL) in CH<sub>2</sub>Cl<sub>2</sub> (20 mL) was added TsCl (4.261 g, 22.35 mmol) at 0 °C and then stirred at rt for 2 h. The resulting mixture was diluted with CH<sub>2</sub>Cl<sub>2</sub> and washed with water, 1N HCl, sat. NaHCO<sub>3</sub> aq., and brine. The organic layer was dried over Na<sub>2</sub>SO<sub>4</sub> and concentrated. The crude mixture was used in the next step without further purifications. To the crude mixture dissolved in THF (30 mL) were added PPh<sub>3</sub> (5.788 g, 22.07 mmol) and CCl<sub>4</sub> (3 mL) and the mixture was stirred at 50 °C for 24 h. The resulting mixture was concentrated and purified by silica gel column chromatograph (hexane/EtOAc = 5/1) to give 4-(2-chloroethyl)-1-tosylpiperidine as a white solid (5.256 g, 17.41 mmol, 88%).

A mixture of the chloride (5.256 g, 17.41 mmol) and *n*-Bu<sub>4</sub>N•F(H<sub>2</sub>O)<sub>5</sub> (14.16 g, 40.22 mmol) was stirred at 80 °C for 12 h. After addition of H<sub>2</sub>O (10 mL), products were extracted by EtOAc for three times. The combined organic layer was dried over Na<sub>2</sub>SO<sub>4</sub>, through a short pad of silica gel, and concentrated to give an orange oil. The fluorinated product was purified silica gel column chromatography (hexane/EtOAc = 100/0 to 70/30) to give the title compound as a white solid (2.576 g, 9.027 mmol, 52%): mp = 112 °C; <sup>1</sup>H NMR (400 MHz, CDCl<sub>3</sub>): δ 7.64 (d, *J* = 8.0 Hz, 2H, *Ar*), 7.32 (d, *J* = 8.0 Hz, 2H, *Ar*), 4.46 (dt, *J* = 47.2, 6.0 Hz, 2H, CH<sub>2</sub>F), 3.77 (d, *J* = 12.0 Hz, 2H, *piperidine*), 2.43 (s, 3H, *Me*), 2.23 (t, *J* = 10.8 Hz, 2H, *piperidine*), 1.77 (d, *J* = 12.0 Hz, 2H, *piperidine*), 1.69–1.55 (m, 2H, methylene), 1.50–1.30 (m, 3H, *piperidine*); <sup>13</sup>C NMR (100 MHz, CDCl<sub>3</sub>): δ 143.4, 132.9, 129.5, 127.7, 82.4, 80.8, 46.3, 36.5, 36.3, 31.61, 31.57, 31.2, 21.5; <sup>19</sup>F NMR (376 MHz, CDCl<sub>3</sub>): δ -117.6 (sept, *J* = 22.9 Hz); MS (EI) *m/z* (relative intensity, %): 285 ([M]<sup>+</sup>, 43), 284 (35), 155 (31), 130 (100); HRMS (EI) *m/z* [M]<sup>+</sup> Calcd for C<sub>14</sub>H<sub>20</sub>FNO<sub>2</sub>S 285.1199; Found 285.1197.

#### 11-Fluoro-1-undecene (1j)<sup>S10</sup>

A mixture of 11-chloro-1-undecene (2.39 g, 10.3 mmol) and *n*-Bu<sub>4</sub>N•F(H<sub>2</sub>O)<sub>5</sub> (7.13 g, 20.3 mmol) was stirred at 80 °C for 8 h. After addition of H<sub>2</sub>O (10 mL), products were extracted by EtOAc for three times. The combined organic layer was dried over Na<sub>2</sub>SO<sub>4</sub>, through a short pad of silica gel, and concentrated to give an orange oil. The fluorinated product was purified by distillation (bp = 84 °C, 0.9 kPa) to give a colorless oil. Further purification by GPC (CHCl<sub>3</sub> as an eluent) gave the title compound as a colorless oil (0.535 g, 3.11 mmol, 30%): <sup>1</sup>H NMR (400 MHz, CDCl<sub>3</sub>): δ 5.87–5.74 (m, 1H, CH=CH<sub>2</sub>), 5.02–4.91 (m, 2H, CH=CH<sub>2</sub>), 4.43 (dt, *J* = 48.0, 6.8 Hz, 2H, FCH<sub>2</sub>), 2.07–2.01 (m, 2H, methylene), 1.75–1.62 (m, 2H, FCH<sub>2</sub>CH<sub>2</sub>), 1.39–1.29 (m, 12H, methylene); <sup>13</sup>C NMR (100 MHz, CDCl<sub>3</sub>): δ 139.2, 114.1, 84.2 (d, *J* = 163.1 Hz), 33.8, 30.4 (d, *J* = 19.1 Hz), 29.44, 29.37, 29.2, 29.1, 28.9, 25.1 (d, *J* = 4.7 Hz); <sup>19</sup>F NMR (376 MHz, CDCl<sub>3</sub>): δ -217.9 (t, *J* = 52.3 Hz); MS (DART) *m/z* (relative intensity, %): 173 ([M+H]<sup>+</sup>, 2), 151 (7), 102 (100); HRMS (DART) *m/z* [M+H]<sup>+</sup> Calcd for C<sub>11</sub>H<sub>22</sub>F 173.1706; Found 173.1724.

### 1-*tert*-Butoxycarbonyl-4-(2-fluoroethyl)piperidine (1k)<sup>S1</sup>

The title compound was synthesized from 1-*tert*-butoxycarbonyl-4-(2-fluoroethyl)piperidine by a similar procedure employed for the synthesis of 4-(2-fluoroethyl)-1-tosylpiperidine. White solid: mp 36 °C; <sup>1</sup>H NMR (400 MHz, CDCl<sub>3</sub>): δ 4.52 (dt, *J* = 47.2, 6.0 Hz, 2H, CH<sub>2</sub>F), 4.10 (br, 2H), 2.70 (br, 2H), 1.71–1.60 (m, 5H), 1.46 (s, 9H, *t*-Bu), 1.18–1.10 (m, 2H); <sup>13</sup>C NMR (100 MHz, CDCl<sub>3</sub>): δ 154.8, 81.9 (d, *J* = 163.0 Hz), 79.3, 44.0 (br), 36.9 (d, *J* = 19.0 Hz), 32.4 (d, *J* = 3.8 Hz), 31.9, 28.4; <sup>19</sup>F NMR (376 MHz, CDCl<sub>3</sub>): δ –218.4–218.8 (m); MS (DART) *m/z* (relative intensity, %): 232 ([M+H]<sup>+</sup>, 89), 195 (12), 176 (100), 132 (35); HRMS (DART) *m/z* [M+H]<sup>+</sup> Calcd for C<sub>12</sub>H<sub>23</sub>NO<sub>2</sub>F 232.1713; Found 232.1699.

### 3-Fluoropropyl phenyl ether (1l)<sup>S10</sup>

A mixture of 3-bromopropyl phenyl ether (2.23 g, 10.37 mmol) and *n*-Bu<sub>4</sub>N•F(H<sub>2</sub>O)<sub>5</sub> (7.00 g, 19.9 mmol) was stirred at 80 °C for 8 h. After addition of H<sub>2</sub>O (10 mL), products were extracted by EtOAc for three times. The combined organic layer was dried over Na<sub>2</sub>SO<sub>4</sub>, filtrated through a short pad of silica gel, and concentrated to give an orange oil. The fluorinated product was purified silica gel column chromatography (hexane/EtOAc = 100/0 to 90/10) to give the title compound as a colorless oil (0.628 g, 6.49 mmol, 63%): <sup>1</sup>H NMR (400 MHz, CDCl<sub>3</sub>): δ 7.32–7.27 (m, 12, *Ph*), 6.97–6.90 (m, 3H, *Ph*), 4.65 (dd, *J* = 46.8, 5.6 Hz, 2H, FCH<sub>2</sub>), 4.09 (t, *J* = 5.6 Hz, 2H, OCH<sub>2</sub>), 2.17 (dt, *J* = 26.0, 5.6 Hz, 2H, *methylene*); <sup>13</sup>C NMR (100 MHz, CDCl<sub>3</sub>): δ 158.7, 129.5, 120.8, 114.4, 80.8 (d, *J* = 163.0 Hz), 63.3 (d, *J* = 4.7 Hz), 30.4 (d, *J* = 20.0 Hz); <sup>19</sup>F NMR (376 MHz, CDCl<sub>3</sub>): δ –222.2 (q, *J* = 51.9 Hz); MS (EI) *m/z* (relative intensity, %): 154 ([M]<sup>+</sup>, 44), 94 (100); HRMS (EI) *m/z* [M]<sup>+</sup> Calcd for C<sub>9</sub>H<sub>11</sub>FO 154.0794; Found 154.0796.

### 1-Chloro-6-fluorohexane (1m)<sup>S1</sup>

To a solution of 6-fluoro-1-hexanol (1.21 g, 10.1 mmol) and PPh<sub>3</sub> (2.90 g, 11.1 mmol) in CH<sub>2</sub>Cl<sub>2</sub> (10 mL) was added CCl<sub>4</sub> (1.2 mL, 12.4 mmol) at rt and then refluxed for 3 h. After cooling to ambient temperature, pentane (50 mL) was added to give a white suspension. The mixture was filtrated through a short pad of silica gel and concentrated. The fluorinated product was purified by distillation (bp = 73-76 °C, 4.1 kPa) to give the title compound as a colorless oil (0.751 g, 5.42 mmol, 54%): <sup>1</sup>H NMR (400 MHz, CDCl<sub>3</sub>): δ 4.45 (dt, *J* = 47.26, 6.0 Hz, 2H, FCH<sub>2</sub>), 3.55 (t, *J* = 6.4 Hz, 2H, ClCH<sub>2</sub>), 1.83–1.65 (m, 4H, *methylene*), 1.53–1.43 (m, 4H, *methylene*); <sup>13</sup>C NMR (100 MHz, CDCl<sub>3</sub>): δ 83.9 (d, *J* = 163.1 Hz), 44.9, 32.4, 30.2 (d, *J* = 20.0 Hz), 26.5, 24.5 (d, *J* = 5.7 Hz); <sup>19</sup>F NMR (376 MHz, CDCl<sub>3</sub>): δ –218.4 (t, *J* = 69.2 Hz); MS (CI) *m/z* (relative intensity, %): 119 ([M-F]<sup>+</sup>, 55), 103 ([M-F]<sup>+</sup>, 100), 83 (99).

### 1,1-Diphenyl-6-fluorohex-1-ene (1n)<sup>S10</sup>

To a solution of 6,6-diphenylhex-5-en-1-ol (1.54 g, 6.09 mmol) in CH<sub>2</sub>Cl<sub>2</sub> (2 mL) was added DAST (1.30 mL, 9.84 mmol) at 0 °C. After stirring for 18 h, the reaction mixture was diluted with CH<sub>2</sub>Cl<sub>2</sub> and washed with H<sub>2</sub>O (50 mL x 3). The organic layer was dried over Na<sub>2</sub>SO<sub>4</sub> and concentrated. The fluorinated product was purified by silica gel column chromatography (hexane/EtOAc = 100/0 to 98/2) to give the title compound as a colorless oil (0.887 g, 3.49 mmol, 57%). <sup>1</sup>H NMR (400 MHz, CDCl<sub>3</sub>): δ 7.39–7.12 (m, 10H, *Ph*), 6.07 (t, *J* = 7.6 Hz, 1H, =CH), 4.39 (dt, *J* = 47.2, 6.0 Hz, 2H, FCH<sub>2</sub>), 2.16 (q, *J* = 7.6 Hz, 2H, CH<sub>2</sub>CH=), 1.76–1.52 (m, 4H, *methylene*): <sup>13</sup>C NMR (100 MHz, CDCl<sub>3</sub>): δ 142.6, 142.1, 140.1, 129.8, 129.2, 128.2, 128.1, 127.2, 126.90, 126.87, 83.9 (d, *J* = 164.0 Hz), 29.9 (d, *J* = 19.1 Hz), 29.2, 25.4 (d, *J* = 5.7 Hz): <sup>19</sup>F NMR (376 MHz, CDCl<sub>3</sub>): δ -218.2 (sept, *J* = 25.9 Hz): MS (EI) *m/z* (relative intensity, %): 254 ([M]<sup>+</sup>, 51), 193 (100): HRMS (EI) *m/z* [M]<sup>+</sup> Calcd for C<sub>18</sub>H<sub>19</sub>F 254.1471; Found 254.1468.

**General procedure for optimization of the four-component coupling of *n*-OctF, 4-fluorophenyl Grignard reagent, and 1,3-butadiene (Table 1)**

An oven-dried test tube was charged with catalyst and a stirring bar and closed with a septum cap. The test tube was evacuated and back-filled with nitrogen three times. 1-Fluorooctane (**1a**) (132 mg, 1.0 mmol) and THF (0.50 mL) were added via syringe at ambient temperature. 4-Fluorophenylmagnesium bromide (**2a**) (in THF, 0.80 M, 2.50 mL, 2.0 mmol) and 1,3-butadiene (67 mL as gas, 3.0 mmol) were added at  $-78\text{ }^{\circ}\text{C}$  and then stirred in an oil bath. After 24 h, the reaction mixture was diluted with Et<sub>2</sub>O and carefully quenched by 1N HCl aq. After addition of dodecane (30  $\mu\text{L}$ ) as an internal standard, organic layer was analyzed by GC to determine the yield of the products **3aa** and **4aa**.

**General procedure for Ni-catalyzed four-component coupling of alkyl fluorides, Grignard reagents and 1,3-butadiene (Scheme 2, eqn 1, and eqn 5)**

In a glove box, NiBr<sub>2</sub>(dme) (30.9 mg, 10 mol%) was charged to a test tube and capped with a septum. The test tube was brought out and added alkyl fluoride (1 mmol) and THF (total 3.0 mL) via syringe at ambient temperature. Grignard reagent (in THF, 2.0 mmol) and 1,3-butadiene (67 mL as gas, 3.0 mmol) were added at  $-78\text{ }^{\circ}\text{C}$  and then stirred at  $30\text{ }^{\circ}\text{C}$ . After 24 h, the reaction mixture was carefully quenched by 1N HCl aq. and the products were extracted by Et<sub>2</sub>O for three times, dried over Na<sub>2</sub>SO<sub>4</sub>, concentrated, filtered through a short pad of silica gel (hexane or Et<sub>2</sub>O as eluent), and purified by GPC (CHCl<sub>3</sub> as eluent) to give the desired product.

**General procedure for optimization of the four-component coupling of *n*-OctF, 2-methylphenyl Grignard reagent, and 1,3-butadiene (Table 2)**

An oven-dried test tube was charged with catalyst and a stirring bar and closed with a septum cap. The test tube was evacuated and back-filled with nitrogen three times. 1-Fluorooctane (**1a**) (132 mg, 1.0 mmol) and THF (1.17 mL) were added via syringe at ambient temperature. 2-Methylphenylmagnesium bromide (**2a**) (in THF, 0.82 M, 1.83 mL, 1.5 mmol) and 1,3-butadiene (67 mL as gas, 3.0 mmol) were added at  $-78\text{ }^{\circ}\text{C}$  and then stirred in an oil bath. After 10 h, the reaction mixture was diluted with Et<sub>2</sub>O and carefully quenched by 1N HCl aq. After addition of dodecane (30  $\mu\text{L}$ ) as an internal standard, organic layer was analyzed by GC to determine the yield of the product **3aj**.

**General procedure for Ni-catalyzed four-component coupling of alkyl fluorides, *ortho*-substituted Grignard reagents, and 1,3-butadiene (Scheme 3, and eqn 6)**

An oven-dried test tube was charged with NiBr<sub>2</sub>(dme) (7.7 mg, 5 mol%) and a stirring bar and closed with a septum cap. The test tube was evacuated and back-filled with nitrogen three times. Alkyl fluoride (0.5 mmol) and THF were added via syringe at ambient temperature. Grignard reagent (in THF, 0.75 mmol), and 1,3-butadiene (34 mL as gas, 1.5 mmol) were added at  $-78\text{ }^{\circ}\text{C}$  and then stirred at  $40\text{ }^{\circ}\text{C}$ .

After 10 h, the reaction mixture was diluted with Et<sub>2</sub>O and carefully quenched by 1N HCl aq. The products were extracted by Et<sub>2</sub>O for three times, dried over Na<sub>2</sub>SO<sub>4</sub>, concentrated, filtered through a short pad of silica gel (hexane or Et<sub>2</sub>O as eluent), and purified by GPC (CHCl<sub>3</sub> as eluent) to give the desired product.

## Characterization Data for the Isolated Compounds

### The reaction of 1-fluorooctane (1a) with 4-fluorophenylmagnesium bromide (2a)

The representative general procedure was followed using 1-fluorooctane (141.0 mg, 1.07 mmol), 4-fluorophenylmagnesium bromide (in THF, 0.80 M, 2.5 mL, 2.0 mmol), and 1,3-butadiene (68 mL as gas, 3 mmol) in THF (total 3 mL) at 30 °C for 24 h. Purification by GPC gave the desired product **3aa** as a colorless oil (163.2 mg, 48%) accompanied by the cross-coupling product **4aa** as a colorless oil (82.8 mg, 37%).

#### (E)-1-(4-Fluorophenyl)-6-vinyltetradec-2-ene (3aa):<sup>S1</sup>

<sup>1</sup>H NMR (400 MHz, CDCl<sub>3</sub>): δ 7.12 (dd, *J* = 8.4, 5.6 Hz, 2H), 6.96 (t, *J* = 8.4 Hz, 2H), 5.54–5.44 (m, 3H), 4.97–4.89 (m, 2H), 3.28 (d, *J* = 5.2 Hz, 2H), 2.10–1.89 (m, 3H), 1.48–1.38 (m, 1H), 1.36–1.17 (m, 15H), 0.88 (t, *J* = 6.8 Hz, 3H); <sup>13</sup>C NMR (100 MHz, CDCl<sub>3</sub>): δ 162.5, 160.1, 143.2, 136.7, 136.6, 132.2, 129.8, 129.7, 128.6, 115.1, 114.9, 114.2, 43.6, 38.2, 35.0, 34.7, 31.9, 30.1, 29.8, 29.6, 29.3, 27.1, 22.7, 14.1; <sup>19</sup>F NMR (376 MHz, CDCl<sub>3</sub>): δ –117.8 (s); MS (EI) *m/z* (relative intensity, %): 316 ([M]<sup>+</sup>, 2), 287 (1), 162 (22), 147 (28), 122 (37), 109 (100); HRMS (EI) *m/z* [M]<sup>+</sup> Calcd for C<sub>22</sub>H<sub>33</sub>F 316.2566; Found 316.2573.

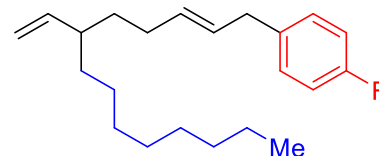

#### 1-Fluoro-4-octylbenzene (4aa):<sup>S1</sup>

<sup>1</sup>H NMR (400 MHz, CDCl<sub>3</sub>): δ 7.11 (dd, *J* = 8.8, 5.6 Hz, 2H), 6.95 (t, *J* = 8.8 Hz, 2H), 2.56 (t, *J* = 7.6 Hz, 2H), 1.59–1.56 (m, 2H), 1.30–1.26 (m, 10H), 0.88 (t, *J* = 6.8 Hz, 3H); <sup>13</sup>C NMR (100 MHz, CDCl<sub>3</sub>): δ 162.3, 159.9, 138.49, 138.46, 129.7, 129.6, 115.0, 114.8, 35.1, 31.9, 31.6, 29.4, 29.24, 29.20, 22.7, 14.1; <sup>19</sup>F NMR (376 MHz, CDCl<sub>3</sub>): δ –118.2 (s); MS (EI) *m/z* (relative intensity, %): 208 ([M]<sup>+</sup>, 15), 109 (100); HRMS (EI) *m/z* [M]<sup>+</sup> Calcd for C<sub>14</sub>H<sub>21</sub>F 208.1627; Found 208.1625.

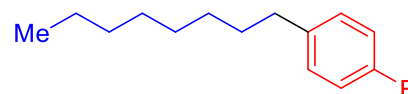

### The reaction of 2-(6-fluorohexan-1-yloxy)tetrahydropyran (1b) with 4-fluorophenylmagnesium bromide (2a)

The representative general procedure was followed using 2-(6-fluorohexan-1-yloxy)tetrahydropyran (204.4 mg, 1.00 mmol), 4-fluorophenylmagnesium bromide (in THF, 0.80 M, 2.5 mL, 2.0 mmol), and 1,3-butadiene (68 mL as gas, 3 mmol) in THF (total 3 mL) at 30 °C for 24 h. Purification by GPC gave the desired product **3ba** as a colorless oil (188.3 mg, 48%) accompanied by the cross-coupling product **4ba** as a colorless oil (97.3 mg, 35%).

#### (E)-2-[12-(4-Fluorophenyl)-7-vinyl-10-dodecen-1-yloxy]tetrahydropyran (3ba):

<sup>1</sup>H NMR (400 MHz, CDCl<sub>3</sub>): δ 7.12 (dd, *J* = 8.4, 5.6 Hz, 2H), 6.96 (t, *J* = 8.4 Hz, 2H), 5.54–5.44 (m, 3H), 4.97–4.89 (m, 2H), 4.57 (q, *J* = 2.4 Hz, 1H), 3.89–3.84 (m, 1H), 3.75–3.70 (m, 1H), 3.51–3.47 (m, 1H), 3.40–3.35 (m, 1H), 3.28 (d, *J* = 5.6 Hz, 2H), 2.09–1.22 (m, 21H); <sup>13</sup>C NMR (100 MHz, CDCl<sub>3</sub>): δ 162.5,

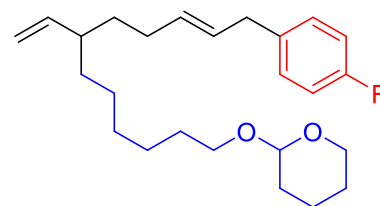



160.1, 143.1, 136.63, 136.60, 132.1, 129.8, 129.7, 128.6, 115.1, 114.9, 114.3 67.7, 62.3, 43.6, 38.2, 34.9, 34.7, 30.8, 30.1, 29.7, 29.5, 27.0, 26.2, 25.5, 18.7;  $^{19}\text{F}$  NMR (376 MHz,  $\text{CDCl}_3$ ):  $\delta$  -117.8 (s); MS (EI)  $m/z$  (relative intensity, %): 388 ( $[\text{M}]^+$ , 1), 161 (11), 149 (12), 148 (16), 109 (34), 85 (100); HRMS (EI)  $m/z$   $[\text{M}]^+$  Calcd for  $\text{C}_{25}\text{H}_{37}\text{FO}_2$  388.2778; Found 388.2775.

**2-[6-(4-Fluorophenyl)-hexan-1-yloxy]tetrahydropyran (4ba):**

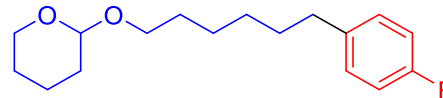

$^1\text{H}$  NMR (400 MHz,  $\text{CDCl}_3$ ):  $\delta$  7.11 (dd,  $J = 8.4, 5.6$  Hz, 2H), 6.95 (t,  $J = 8.4$  Hz, 2H), 4.57 (q,  $J = 2.8$  Hz, 1H), 3.89–3.83 (m, 1H), 3.76–3.70 (m, 1H), 3.52–3.47 (m, 1H), 3.40–3.35 (m, 1H), 2.57 (t,  $J = 7.6$  Hz, 2H), 1.84–1.79 (m, 1H), 1.74–1.68 (m, 1H), 1.63–1.50 (m, 8H), 1.41–1.32 (m, 4H);  $^{13}\text{C}$  NMR (100 MHz,  $\text{CDCl}_3$ ):  $\delta$  162.3, 159.9, 138.33, 138.29, 129.64, 129.62, 129.57, 129.55, 115.0, 114.8, 98.8, 67.6, 62.3, 35.0, 31.5, 30.75, 30.73, 29.6, 29.0, 26.1, 25.5, 19.7;  $^{19}\text{F}$  NMR (376 MHz,  $\text{CDCl}_3$ ):  $\delta$  -118.2 (s); MS (CI)  $m/z$  (relative intensity, %): 281 ( $[\text{M}+\text{H}]^+$ , 63), 179 (33), 109 (11), 85 (100); HRMS (CI)  $m/z$   $[\text{M}+\text{H}]^+$  Calcd for  $\text{C}_{17}\text{H}_{26}\text{O}_2$  281.1917; Found 281.1916.

**The reaction of 6-tert-butyldimethylsiloxy-1-fluorohexane (1c) with 4-fluorophenylmagnesium bromide (2a)**

The representative general procedure was followed using 6-tert-butyldimethylsiloxy-1-fluorohexane (232.4 mg, 0.99 mmol), 4-fluorophenylmagnesium bromide (in THF, 0.80 M, 2.5 mL, 2.0 mmol), and 1,3-butadiene (68 mL as gas, 3 mmol) in THF (total 3 mL) at 30 °C for 24 h. Purification by GPC gave the desired product **3ca** as a colorless oil (192.0 mg, 46%) accompanied by the cross-coupling product **4ca** as a colorless oil (94.8 mg, 31%).

**(E)-12-tert-Butyldimethylsiloxy-1-(4-fluorophenyl)-6-vinyldodec-2-ene (3ca):**

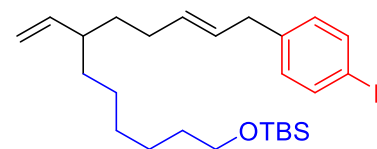

$^1\text{H}$  NMR (400 MHz,  $\text{CDCl}_3$ ):  $\delta$  7.12 (dd,  $J = 8.4, 5.6$  Hz, 2H), 6.96 (t,  $J = 8.4$  Hz, 2H), 5.54–5.45 (m, 3H), 4.97–4.89 (m, 2H), 3.59 (t,  $J = 6.8$  Hz, 2H), 3.28 (d,  $J = 5.6$  Hz, 2H), 2.09–1.92 (m, 3H), 1.61–1.23 (m, 12H), 0.89 (s, 9H), 0.05 (s, 6H);  $^{13}\text{C}$  NMR (100 MHz,  $\text{CDCl}_3$ ):  $\delta$  162.5, 160.1, 143.2, 136.65, 136.62, 132.2, 129.8, 129.7, 128.6, 115.1, 114.9, 114.3 63.3, 43.6, 38.2, 34.9, 34.7, 32.8, 30.1, 29.5, 27.1, 26.0, 25.8, 18.4. -5.3;  $^{19}\text{F}$  NMR (376 MHz,  $\text{CDCl}_3$ ):  $\delta$  -117.8 (s); MS (CI)  $m/z$  (relative intensity, %): 419 ( $[\text{M}+\text{H}]^+$ , 100), 361 (80), 287 (34), 183 (67); HRMS (CI)  $m/z$   $[\text{M}+\text{H}]^+$  Calcd for  $\text{C}_{26}\text{H}_{44}\text{FOSi}$  419.3145; Found 419.3146.

**1-tert-Butyldimethylsiloxy-6-(4-Fluorophenyl)hexane (4ca):**

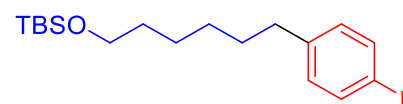

$^1\text{H}$  NMR (400 MHz,  $\text{CDCl}_3$ ):  $\delta$  7.11 (dd,  $J = 8.8, 5.6$  Hz, 2H), 6.95 (t,  $J = 8.8$  Hz, 2H), 3.59 (t,  $J = 6.4$  Hz, 2H), 2.57 (t,  $J = 7.6$  Hz, 2H), 1.61–1.57 (m, 2H), 1.52–1.49 (m, 2H), 1.35–1.32 (m, 4H), 0.89 (s, 9H), 0.04 (s, 6H);  $^{13}\text{C}$  NMR (100 MHz,  $\text{CDCl}_3$ ):  $\delta$  162.3, 159.9, 138.4, 138.3, 129.7, 129.6, 115.0, 114.8, 63.2, 35.0, 32.8, 31.6, 28.9, 26.0, 25.6, 18.4. -5.3;  $^{19}\text{F}$  NMR (376 MHz,  $\text{CDCl}_3$ ):  $\delta$  -118.1 (s); MS (CI)  $m/z$  (relative intensity, %): 311

([M+H]<sup>+</sup>, 100), 253 (20), 183 (9), 179 (9); HRMS (CI) *m/z* [M+H]<sup>+</sup> Calcd for C<sub>18</sub>H<sub>32</sub>FOSi 311.2206; Found 311.2207.

### The reaction of 2-(3-fluoropropyl)thiophene (1d) with 4-fluorophenylmagnesium bromide (2a)

The representative general procedure was followed using 2-(3-fluoropropyl)thiophene (141.1 mg, 0.98 mmol), 4-fluorophenylmagnesium bromide (in THF, 0.80 M, 2.5 mL, 2.0 mmol), and 1,3-butadiene (68 mL as gas, 3 mmol) in THF (total 3 mL) at 30 °C for 24 h. Purification by GPC gave the desired product **3da** as a colorless oil (127.9 mg, 40%) accompanied by the cross-coupling product **4da** as a white semi-solid (71.7 mg, 33%).

#### (E)-2-[9-(4-Fluorophenyl)-4-vinylnon-7-en-1-yl]thiophene (3da):

<sup>1</sup>H NMR (400 MHz, CDCl<sub>3</sub>): δ 7.13–7.09 (m, 3H), 6.95 (t, *J* = 8.4 Hz, 2H), 6.90 (dd, *J* = 5.6, 3.6 Hz, 1H), 6.76 (d, *J* = 3.2 Hz, 1H), 5.51–5.47 (m, 3H), 4.98 (dd, *J* = 10.4, 2.0 Hz, 1H), 4.94 (d, *J* = 18.0 Hz, 1H), 3.28 (d, *J* = 5.6 Hz, 2H), 2.81–2.78 (m, 2H), 2.10–1.90 (m, 3H), 1.74–1.56 (m, 2H), 1.47–1.39 (m, 2H), 1.35–1.25 (m, 2H); <sup>13</sup>C NMR (100 MHz, CDCl<sub>3</sub>): δ 162.5, 160.1, 145.6, 142.7, 136.61, 136.57, 132.0, 129.8, 129.7, 128.8, 126.6, 123.9, 122.8, 115.1, 114.9, 114.7, 43.4, 38.2, 34.6, 34.3, 30.0, 29.9, 29.4; <sup>19</sup>F NMR (376 MHz, CDCl<sub>3</sub>): δ –117.7 (s); MS (EI) *m/z* (relative intensity, %): 328 ([M]<sup>+</sup>, 23), 219 (12), 163 (12), 149 (13), 148 (16), 147 (11), 135 (13), 123 (17), 111 (25), 110 (100); HRMS (EI) *m/z* [M]<sup>+</sup> Calcd for C<sub>21</sub>H<sub>25</sub>FS 328.1661; Found 328.1663.

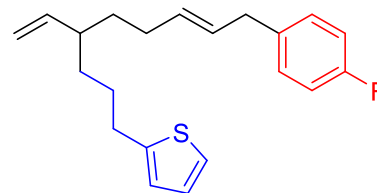

#### 2-[3-(4-Fluorophenyl)propyl]thiophene (4da):

<sup>1</sup>H NMR (400 MHz, CDCl<sub>3</sub>): δ 7.13 (d, *J* = 5.6 Hz, 1H), 7.11 (dd, *J* = 5.6, 1.2 Hz, 2H), 6.98–6.78 (m, 3H), 6.77 (dd, *J* = 2.4, 0.8 Hz, 1H), 2.83 (t, *J* = 7.6 Hz, 2H), 2.64 (t, *J* = 7.6 Hz, 2H), 1.97 (quin, *J* = 7.6 Hz, 2H); <sup>13</sup>C NMR (100 MHz, CDCl<sub>3</sub>): δ 162.4, 160.0, 144.9, 137.44, 137.40, 129.8, 129.7, 126.7, 124.20, 124.18, 123.0, 115.1, 114.9, 34.2, 33.3, 29.2; <sup>19</sup>F NMR (376 MHz, CDCl<sub>3</sub>): δ –117.5 (s); MS (EI) *m/z* (relative intensity, %): 220 ([M]<sup>+</sup>, 44), 123 (11), 111 (14), 110 (15), 109 (24), 98 (100); HRMS (EI) *m/z* [M]<sup>+</sup> Calcd for C<sub>13</sub>H<sub>13</sub>FS 220.0722; Found 220.0721.

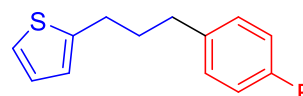

### The reaction of 1-fluoro-3-(4-fluorophenoxy)propane (1e) with 4-fluorophenylmagnesium bromide (2a)

The representative general procedure was followed using 1-fluoro-3-(4-fluorophenoxy)propane (182.4 mg, 1.06 mmol), 4-fluorophenylmagnesium bromide (in THF, 0.80 M, 2.5 mL, 2.0 mmol), and 1,3-butadiene (68 mL as gas, 3 mmol) in THF (total 3 mL) at 30 °C for 24 h. Purification by GPC gave the desired product **3ea** as a colorless oil (165.2 mg, 44%) accompanied by the cross-coupling product **4ea** as a white solid (127.1 mg, 47%).

#### (E)-9-(4-Fluorophenoxy)-1-(4-fluorophenyl)-6-vinylnon-2-ene (3ea):

<sup>1</sup>H NMR (400 MHz, CDCl<sub>3</sub>): δ 7.11 (td, *J* = 5.6, 2.4 Hz, 2H), 6.95 (td, *J*

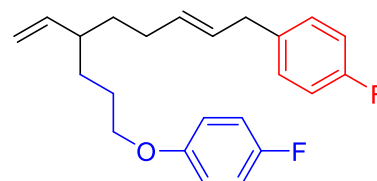

= 8.4, 1.6 Hz, 4H), 6.82–6.79 (m, 2H), 5.52–5.47 (m, 3H), 5.02 (m, 2H), 3.88 (t,  $J = 6.4$  Hz, 2H), 3.28 (d,  $J = 5.6$  Hz, 2H), 2.10–1.96 (m, 3H), 1.81–1.65 (m, 2H), 1.57–1.42 (m, 2H), 1.41–1.29 (m, 2H);  $^{13}\text{C}$  NMR (100 MHz,  $\text{CDCl}_3$ ):  $\delta$  162.5, 160.1, 158.3, 155.9, 155.2, 142.5, 136.60, 136.57, 131.9, 129.8, 129.7, 128.9, 115.8, 115.6, 115.4, 115.3, 115.1, 115.0, 114.9, 68.6, 43.4, 38.2, 34.7, 31.2, 30.1, 27.0;  $^{19}\text{F}$  NMR (376 MHz,  $\text{CDCl}_3$ ):  $\delta$  -117.7 (s, 1F), -124.3 (s, 1F); MS (EI)  $m/z$  (relative intensity, %): 356 ( $[\text{M}]^+$ , 9), 149 (39), 148 (21), (147 (14), 138 (14), 135 (25), 112 (22), 109 (100); HRMS (EI)  $m/z$   $[\text{M}]^+$  Calcd for  $\text{C}_{23}\text{H}_{26}\text{F}_2\text{O}$  356.1952; Found 356.1951.

**1-(4-Fluorophenoxy)-3-(4-fluorophenyl)propane (4ea):**

mp = 56–58 °C;  $^1\text{H}$  NMR (400 MHz,  $\text{CDCl}_3$ ):  $\delta$  7.16–7.10 (m, 2H), 6.96 (td,  $J = 8.8, 2.4$  Hz, 4H), 6.82–6.79 (m, 2H), 3.89 (t,  $J = 6.4$  Hz, 2H), 2.77 (t,  $J = 7.6$  Hz, 2H), 2.05 (tt,  $J = 7.6, 6.4$  Hz, 2H);  $^{13}\text{C}$  NMR

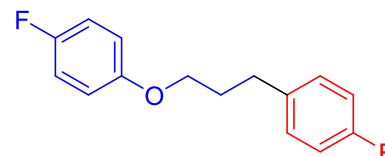

(100 MHz,  $\text{CDCl}_3$ ):  $\delta$  162.5, 160.1, 158.4, 156.0, 155.1, 138.8, 138.7, 137.04, 137.00, 131.8, 130.7, 129.9, 129.8, 129.79, 115.9, 115.7, 115.5, 115.4, 115.3, 115.1, 67.3, 31.3, 30.9;  $^{19}\text{F}$  NMR (376 MHz,  $\text{CDCl}_3$ ):  $\delta$  -117.4 (s, 1F), -124.1 (s, 1F); MS (EI)  $m/z$  (relative intensity, %): 248 ( $[\text{M}]^+$ , 44), 137 (15), 136 (18), 135 (13), 112 (17), 109 (100); HRMS (EI)  $m/z$   $[\text{M}]^+$  Calcd for  $\text{C}_{15}\text{H}_{14}\text{F}_2\text{O}$  248.1013; Found 248.1012.

**The reaction of 3-(4-chlorophenoxy)-1-fluoropropane (1f) with 4-fluorophenylmagnesium bromide (2a)**

The representative general procedure was followed using 3-(4-chlorophenoxy)-1-fluoropropane (192.0 mg, 1.02 mmol), 4-fluorophenylmagnesium bromide (in THF, 0.80 M, 2.5 mL, 2.0 mmol), and 1,3-butadiene (68 mL as gas, 3 mmol) in THF (total 3 mL) at 30 °C for 24 h. Purification by GPC gave the desired product **3fa** as a colorless oil (171.7 mg, 45%) accompanied by the cross-coupling product **4fa** as a colorless oil (115.9 mg, 43%).

**(E)-9-(4-Chlorophenoxy)-1-(4-fluorophenyl)-6-vinylnon-2-ene (3fa):**

$^1\text{H}$  NMR (400 MHz,  $\text{CDCl}_3$ ):  $\delta$  7.21 (d,  $J = 8.8$  Hz, 2H), 7.11 (dd,  $J = 8.8, 5.6$  Hz, 2H), 6.95 (t,  $J = 8.8$  Hz, 2H), 6.80 (d,  $J = 8.8$  Hz, 2H), 5.56–5.47 (m, 3H), 5.01 (dd,  $J = 10.0, 2.4$  Hz, 1H), 4.96 (d,  $J = 17.2$  Hz, 1H), 3.88 (t,  $J = 6.4$  Hz, 2H), 3.28 (d,  $J = 5.6$  Hz, 2H), 2.11–1.92 (m,

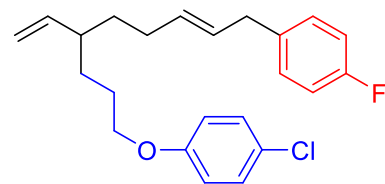

3H), 1.83–1.68 (m, 2H), 1.63–1.46 (m, 2H), 1.42–1.29 (m, 2H);  $^{13}\text{C}$  NMR (100 MHz,  $\text{CDCl}_3$ ):  $\delta$  162.5, 160.1, 157.7, 142.5, 136.6, 131.9, 129.8, 129.7, 128.9, 125.3, 115.7, 115.13, 115.08, 114.9, 68.3, 43.4, 38.2, 34.7, 31.1, 30.0, 26.9;  $^{19}\text{F}$  NMR (376 MHz,  $\text{CDCl}_3$ ):  $\delta$  -117.7 (s); MS (EI)  $m/z$  (relative intensity, %): 372 ( $[\text{M}]^+$ , 9), 154 (11), 149 (39), 148 (22), 147 (13), 135 (27), 128 (23), 109 (100); HRMS (EI)  $m/z$   $[\text{M}]^+$  Calcd for  $\text{C}_{23}\text{H}_{26}\text{ClFO}$  372.1659; Found 372.1659.

**1-(4-Chlorophenoxy)-3-(4-fluorophenyl)propane (4fa):**

$^1\text{H}$  NMR (400 MHz,  $\text{CDCl}_3$ ):  $\delta$  7.21 (d,  $J = 9.2$  Hz, 2H), 7.13 (dd,  $J =$

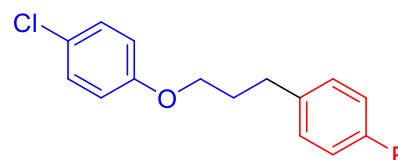

8.4, 5.6 Hz, 2H), 6.96 (t,  $J = 8.4$ , 2H), 6.79 (d,  $J = 8.4$  Hz, 2H), 3.89 (t,  $J = 6.4$  Hz, 2H), 2.76 (t,  $J = 7.6$  Hz, 2H), 2.05 (quin,  $J = 7.6$  Hz, 2H);  $^{13}\text{C}$  NMR (100 MHz,  $\text{CDCl}_3$ ):  $\delta$  162.5, 160.1, 157.6, 136.95, 136.91, 129.9, 129.8, 129.3, 125.5, 115.7, 115.3, 115.1, 66.9, 31.3, 30.8;  $^{19}\text{F}$  NMR (376 MHz,  $\text{CDCl}_3$ ):  $\delta$  -117.3; MS (EI)  $m/z$  (relative intensity, %): 264 ( $[\text{M}]^+$ , 37), 137 (19), 136 (19), 135 (13), 128 (19), 109 (100); HRMS (EI)  $m/z$   $[\text{M}]^+$  Calcd for  $\text{C}_{15}\text{H}_{14}\text{ClFO}$  264.0717; Found 264.0719.

### The reaction of 4-(2-fluoroethyl)-1-tosylpiperidine (**1g**) with 4-fluorophenylmagnesium bromide (**2a**)

The representative general procedure was followed using 4-(2-fluoroethyl)-1-tosylpiperidine (285.7 mg, 1.00 mmol), 4-fluorophenylmagnesium bromide (in THF, 0.80 M, 2.5 mL, 2.0 mmol), and 1,3-butadiene (68 mL as gas, 3 mmol) in THF (total 3 mL) at 30 °C for 24 h. Purification by GPC gave the desired product **3ga** as a colorless oil (292.9 mg, 62%) accompanied by the cross-coupling product **4ga** as a white solid (50.3 mg, 14%).

#### (*E*)-4-[8-(4-Fluorophenyl)-3-vinyloct-6-en-1-yl]-1-tosylpiperidine

##### (**3ga**):

$^1\text{H}$  NMR (400 MHz,  $\text{CDCl}_3$ ):  $\delta$  7.64 (d,  $J = 8.0$  Hz, 2H), 7.31 (d,  $J = 8.0$  Hz, 2H), 7.10 (dd,  $J = 8.4$ , 5.2 Hz, 2H), 6.95 (t,  $J = 8.4$  Hz, 2H), 5.54–5.40 (m, 3H), 4.97–4.86 (m, 2H), 3.75 (d,  $J = 11.2$  Hz, 2H), 3.27 (d,  $J = 6.0$  Hz, 2H), 2.43 (s, 3H), 2.18 (t,  $J = 12.0$  Hz, 2H), 2.10–1.83 (m, 3H), 1.68 (d,  $J = 12.0$  Hz, 2H), 1.45–1.05 (m, 9H);  $^{13}\text{C}$  NMR (100 MHz,  $\text{CDCl}_3$ ):  $\delta$  162.5, 160.0, 143.3, 142.7, 136.6, 136.5, 133.1, 131.9, 129.8, 129.7, 129.5, 128.7, 127.7, 115.1, 114.9, 114.7, 46.5, 43.7, 38.2, 35.2, 34.6, 33.5, 31.8, 31.6, 31.4, 30.0, 21.5;  $^{19}\text{F}$  NMR (376 MHz,  $\text{CDCl}_3$ ):  $\delta$  -117.6 (s); MS (EI)  $m/z$  (relative intensity, %): 469 ( $[\text{M}]^+$ , 12), 315 (17), 314 (69), 262 (15), 249 (27), 236 (100); HRMS (EI)  $m/z$   $[\text{M}]^+$  Calcd for  $\text{C}_{28}\text{H}_{36}\text{FNO}_2\text{S}$  469.2451; Found 469.2449.

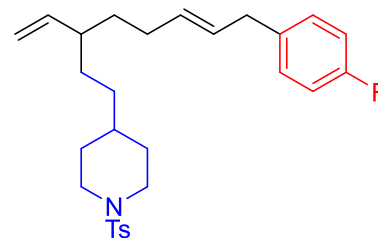

#### 4-[2-(4-Fluorophenyl)ethyl]-1-tosylpiperidine (**4ga**):

mp = 137–139 °C;  $^1\text{H}$  NMR (400 MHz,  $\text{CDCl}_3$ ):  $\delta$  7.63 (d,  $J = 8.0$  Hz, 2H), 7.31 (d,  $J = 8.0$  Hz, 2H), 7.07 (dd,  $J = 8.4$ , 6.8 Hz, 2H), 6.93 (t,  $J = 8.4$  Hz, 2H), 3.76 (d,  $J = 12.0$  Hz, 2H), 2.55 (t,  $J = 8.0$  Hz, 2H), 2.42 (s, 3H), 2.18 (td,  $J = 12.0$ , 2.4 Hz, 2H), 1.75 (d,  $J = 12.4$  Hz, 2H), 1.51 (dd,  $J = 15.6$ , 6.8 Hz, 2H), 1.33 (qd,  $J = 12.4$ , 3.6 Hz, 2H), 1.19–1.14 (m, 1H);  $^{13}\text{C}$  NMR (100 MHz,  $\text{CDCl}_3$ ):  $\delta$  162.3, 159.9, 143.3, 137.60, 137.57, 133.0, 129.5, 129.4, 127.7, 115.1, 114.9, 46.3, 37.7, 34.3, 31.9, 31.3, 21.5;  $^{19}\text{F}$  NMR (376 MHz,  $\text{CDCl}_3$ ):  $\delta$  -117.6 (s); MS (EI)  $m/z$  (relative intensity, %): 361 ( $[\text{M}]^+$ , 30), 236 (13), 207 (15), 206 (100); HRMS (EI)  $m/z$   $[\text{M}]^+$  Calcd for  $\text{C}_{20}\text{H}_{24}\text{FNO}_2\text{S}$  361.1512; Found 361.1514.

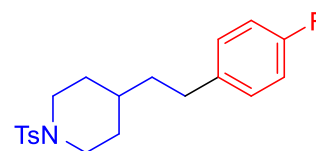

### The reaction of fluoromethylcyclohexane (**1h**) with 4-fluorophenylmagnesium bromide (**2a**)

The representative general procedure was followed in a 0.4 mmol scale using fluoromethylcyclohexane

(48.2 mg, 0.42 mmol), 4-fluorophenylmagnesium bromide (in THF, 0.80 M, 1.0 mL, 0.84 mmol), and 1,3-butadiene (28 mL as gas, 1.3 mmol) in THF (total 1.2 mL) at 30 °C for 24 h. Purification by GPC gave the desired product **3ha** as a colorless oil (39.1 mg, 31%) accompanied by the cross-coupling product **4ha** as a colorless oil (15.2 mg, 19%).

**(E)-6-(Cyclohexylmethyl)-8-(4-fluorophenyl)octa-1,6-diene (3ha):**

<sup>1</sup>H NMR (400 MHz, CDCl<sub>3</sub>): δ 7.11 (dd, *J* = 8.8, 5.6 Hz, 2H), 6.95 (t, *J* = 8.8 Hz, 2H), 5.51–5.42 (m, 3H), 4.96–4.88 (m, 2H), 3.28 (d, *J* = 6.0 Hz, 2H), 2.15–1.90 (m, 3H), 1.78–1.55 (m, 5H), 1.45–1.32 (m, 1H), 1.32–1.08 (m, 7H), 0.92–0.72 (m, 2H); <sup>13</sup>C NMR (100 MHz, CDCl<sub>3</sub>): δ 162.5, 160.1, 143.4, 136.7, 136.6, 132.2, 131.4, 129.8, 129.7, 129.2, 128.7, 115.14, 115.11, 115.09, 114.94, 114.91, 114.88, 114.1, 43.0, 40.5, 38.1, 35.0, 34.7, 34.2, 32.7, 30.0, 26.7, 26.4, 26.3; <sup>19</sup>F NMR (376 MHz, CDCl<sub>3</sub>): δ –117.7 (s); MS (EI) *m/z* (relative intensity, %): 300 ([M]<sup>+</sup>, 4), 191 (10), 162 (31), 161 (13), 149 (44), 148 (42), 147 (34), 135 (27), 122 (42), 109 (100); HRMS (EI) *m/z* [M]<sup>+</sup> Calcd for C<sub>21</sub>H<sub>29</sub>F 300.2253; Found 300.2254.

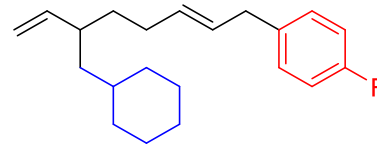

**1-Fluoro-4-(cyclohexylmethyl)benzene (4ha):**

<sup>1</sup>H NMR (400 MHz, CDCl<sub>3</sub>): δ 7.07 (dd, *J* = 8.8, 6.0 Hz, 2H), 6.94 (t, *J* = 8.8 Hz, 2H), 2.44 (d, *J* = 7.2 Hz, 2H), 1.69–1.63 (m, 5H), 1.49–1.44 (m, 1H), 1.20–1.12 (m, 3H), 0.95–0.87 (m, 2H); <sup>13</sup>C NMR (100 MHz, CDCl<sub>3</sub>): δ 162.3, 159.9, 136.9, 136.8, 130.4, 130.3, 128.6, 128.5, 127.4, 115.8, 115.6, 114.8, 114.6, 43.2, 39.8, 33.0, 26.5, 26.2; <sup>19</sup>F NMR (376 MHz, CDCl<sub>3</sub>): δ –118.2 (s); MS (EI) *m/z* (relative intensity, %): 192 ([M]<sup>+</sup>, 54), 111 (8), 110 (100), 109 (56); HRMS (EI) *m/z* [M]<sup>+</sup> Calcd for C<sub>13</sub>H<sub>17</sub>F 192.1314; Found 192.1313.

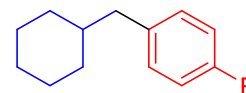

**The reaction of 1-fluorooctane (1a) with phenylmagnesium bromide (2b)**

The representative general procedure was followed using 1-fluorooctane (125.5 mg, 0.95 mmol), phenylmagnesium bromide (in THF, 0.82 M, 2.4 mL, 2.0 mmol), and 1,3-butadiene (68 mL as gas, 3 mmol) in THF (total 3 mL) at 30 °C for 24 h. Purification by GPC gave the desired product **3ab** as a colorless oil (113.6 mg, 40%) accompanied by the cross-coupling product **4ab** as a colorless oil (99.7 mg, 55%).

**(E)-1-Phenyl-6-vinyltetradec-2-ene (3ab):**

<sup>1</sup>H NMR (400 MHz, CDCl<sub>3</sub>): δ 7.30–7.25 (m, 2H), 7.20–7.17 (m, 3H), 5.56–5.46 (m, 3H), 4.97–4.89 (m, 2H), 3.32 (d, *J* = 6.0 Hz, 2H), 2.10–1.90 (m, 3H), 1.48–1.38 (m, 1H), 1.35–1.17 (m, 15H), 0.88 (t, *J* = 6.8 Hz, 3H); <sup>13</sup>C NMR (100 MHz, CDCl<sub>3</sub>): δ 143.3, 141.1, 132.0, 128.7, 128.4, 128.3, 125.8, 114.2, 43.6, 39.1, 35.0, 34.7, 31.9, 30.1, 29.7, 29.6, 29.3, 27.1, 22.7, 14.1; MS (DART) *m/z* (relative intensity, %): 299 ([M+H]<sup>+</sup>, 92), 239 (31), 195 (30), 131 (36); HRMS (DART) *m/z* [M+H]<sup>+</sup> Calcd for C<sub>22</sub>H<sub>35</sub> 299.2739; Found 299.2716.

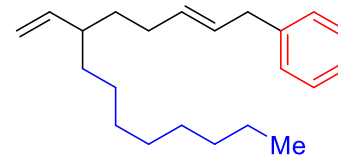

**Octylbenzene (4ab):**<sup>S11</sup>

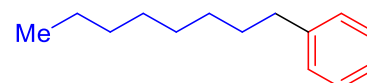

<sup>1</sup>H NMR (400 MHz, CDCl<sub>3</sub>): δ 7.29–7.25 (m, 2H), 7.18–7.17 (m, 3H), 2.60 (t, *J* = 7.6 Hz, 2H), 1.61 (quin, *J* = 7.6 Hz, 2H), 1.35–1.20 (m, 10H), 0.88 (t, *J* = 6.8 Hz, 3H); <sup>13</sup>C NMR (100 MHz, CDCl<sub>3</sub>): δ 143.0, 128.4, 128.2, 125.5, 36.0, 31.9, 31.5, 29.5, 29.4, 29.3, 22.7, 14.1; MS (DART) *m/z* (relative intensity, %): 191 ([M+H]<sup>+</sup>, 15), 187 (90), 185 (100), 131 (42), 117 (38), 105 (75); HRMS (DART) *m/z* [M+H]<sup>+</sup> Calcd for C<sub>14</sub>H<sub>23</sub> 191.1800; Found 191.1782.

### The reaction of 1-fluorooctane (1a) with 4-methylphenylmagnesium bromide (2c)

The representative general procedure was followed using 1-fluorooctane (133.0 mg, 1.01 mmol), 4-methylphenylmagnesium bromide (in THF, 0.73 M, 2.7 mL, 2.0 mmol), and 1,3-butadiene (68 mL as gas, 3 mmol) in THF (total 3 mL) at 30 °C for 24 h. Purification by GPC gave the desired product **3ac** as a pale yellow oil (109.0 mg, 34%) accompanied by the cross-coupling product **4ac** as a colorless oil (136.9 mg, 66%).

#### (*E*)-1-(4-Methylphenyl)-6-vinyltetradec-2-ene (3ac):

<sup>1</sup>H NMR (400 MHz, CDCl<sub>3</sub>): δ 7.09 (d, *J* = 8.0 Hz, 2H), 7.06 (d, *J* = 8.0 Hz, 2H), 5.56–5.45 (m, 3H), 4.96–4.90 (m, 2H), 3.28 (d, *J* = 6.0 Hz, 2H), 2.32 (s, 3H), 2.10–1.89 (m, 3H), 1.48–1.38 (m, 1H), 1.35–1.17 (m, 15H), 0.88 (t, *J* = 6.8 Hz, 3H); <sup>13</sup>C NMR (100 MHz, CDCl<sub>3</sub>): δ 143.3, 138.0, 135.3, 131.7, 129.02, 128.99, 128.3, 114.2, 43.6, 38.6, 35.0, 34.7, 31.9, 30.1, 29.7, 29.6, 29.3, 27.1, 22.7, 21.0, 14.1; MS (DART) *m/z* (relative intensity, %): 313 ([M+H]<sup>+</sup>, 100), 311 (70), 195 (33), 147 (77); HRMS (DART) *m/z* [M+H]<sup>+</sup> Calcd for C<sub>23</sub>H<sub>37</sub> 313.2895; Found 313.2874.

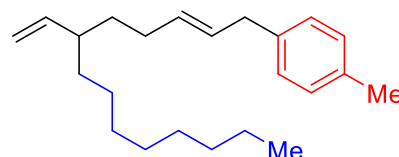

#### 4-Methyl-1-octylbenzene (4ac):<sup>S11</sup>

<sup>1</sup>H NMR (400 MHz, CDCl<sub>3</sub>): δ 7.07 (t, *J* = 8.8 Hz, 4H), 2.55 (t, *J* = 8.0 Hz, 2H), 2.31 (s, 3H), 1.58 (quin, *J* = 7.6 Hz, 2H), 1.35–1.20 (m, 10H), 0.88 (t, *J* = 6.8 Hz, 3H); <sup>13</sup>C NMR (100 MHz, CDCl<sub>3</sub>): δ 139.9, 134.9, 128.9, 128.3, 35.5, 31.9, 31.7, 29.5, 29.4, 29.3, 22.7, 21.0, 14.1; MS (DART) *m/z* (relative intensity, %): 195 ([M+H]<sup>+</sup>, 100), 151 (46), 133 (22); HRMS (DART) *m/z* [M+H]<sup>+</sup> Calcd for C<sub>15</sub>H<sub>25</sub> 205.1956; Found 205.1979.

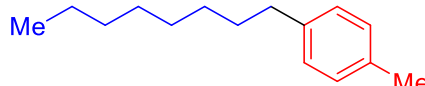

### The reaction of 1-fluorooctane (1a) with 4-methoxyphenylmagnesium bromide (2d):

The representative general procedure was followed using 1-fluorooctane (126.0 mg, 0.95 mmol), 4-methoxyphenylmagnesium bromide (in THF, 0.67 M, 3.0 mL, 2.0 mmol), and 1,3-butadiene (68 mL as gas, 3 mmol) in THF (total 3 mL) at 30 °C for 24 h. Purification by GPC gave the desired product **3ad** as a colorless oil (88.3 mg, 28%) accompanied by the cross-coupling product **4ad** as a colorless oil (134.9 mg, 64%).

#### (*E*)-1-(4-Methoxyphenyl)-6-vinyltetradec-2-ene (3ad):

<sup>1</sup>H NMR (400 MHz, CDCl<sub>3</sub>): δ 7.09 (d, *J* = 8.8 Hz, 2H), 6.83 (d, *J* = 8.8 Hz, 2H), 5.55–5.44 (m, 3H), 4.97–4.90 (m, 2H), 3.78 (s, 3H), 3.26

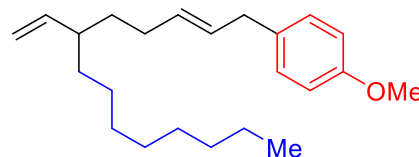

(d,  $J = 6.4$  Hz, 2H), 2.10–1.89 (m, 3H), 1.48–1.38 (m, 1H), 1.35–1.17 (m, 15H), 0.88 (t,  $J = 6.8$  Hz, 3H);  $^{13}\text{C}$  NMR (100 MHz,  $\text{CDCl}_3$ ):  $\delta$  157.8, 143.3, 133.1, 131.6, 129.3, 129.2, 114.2, 113.7, 55.2, 43.6, 38.1, 35.0, 34.7, 31.2, 30.1, 29.7, 29.6, 29.3, 27.1, 22.7, 14.1; MS (DART)  $m/z$  (relative intensity, %): 329 ( $[\text{M}+\text{H}]^+$ , 100), 227 (10), 121 (63); HRMS (DART)  $m/z$   $[\text{M}+\text{H}]^+$  Calcd for  $\text{C}_{23}\text{H}_{37}\text{O}$  329.2844; Found 329.2821.

**1-Methoxy-4-octylbenzene (4ad):**<sup>S12</sup>

$^1\text{H}$  NMR (400 MHz,  $\text{CDCl}_3$ ):  $\delta$  7.09 (d,  $J = 8.4$  Hz, 2H), 6.82 (d,  $J = 8.4$  Hz, 2H), 3.78 (s, 3H), 2.54 (t,  $J = 8.0$  Hz, 2H), 1.60–1.53 (m, 2H), 1.35–1.20 (m, 10H), 0.88 (t,  $J = 6.8$  Hz, 3H);  $^{13}\text{C}$  NMR (100 MHz,  $\text{CDCl}_3$ ):  $\delta$  157.5, 135.0, 129.2, 113.6, 55.2, 35.0, 31.9, 31.8, 29.5, 29.3 (2C), 22.7, 14.1; MS (DART)  $m/z$  (relative intensity, %): 221 ( $[\text{M}+\text{H}]^+$ , 100), 195 (29), 121 (31); HRMS (DART)  $m/z$   $[\text{M}+\text{H}]^+$  Calcd for  $\text{C}_{15}\text{H}_{25}\text{O}$  221.1905; Found 221.1906.

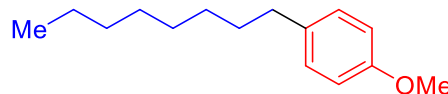

**The reaction of 1-fluorooctane (1a) with 4-chlorophenylmagnesium bromide (2e)**

The representative general procedure was followed using 1-fluorooctane (128.3 mg, 0.97 mmol), 4-chlorophenylmagnesium bromide (in THF, 0.65 M, 3.1 mL, 2.0 mmol), and 1,3-butadiene (68 mL as gas, 3 mmol) in THF (total 3 mL) at 30 °C for 24 h. Purification by GPC gave the desired product **3ae** as a colorless oil (69.5 mg, 22%) accompanied by the cross-coupling product **4ae** as a colorless oil (47.8 mg, 22%).

**(E)-1-(4-Chlorophenyl)-6-vinyltetradec-2-ene (3ae):**

$^1\text{H}$  NMR (400 MHz,  $\text{CDCl}_3$ ):  $\delta$  7.23 (d,  $J = 8.0$  Hz, 2H), 7.09 (d,  $J = 8.0$  Hz, 2H), 5.54–5.45 (m, 3H), 4.97–4.89 (m, 2H), 3.27 (d,  $J = 4.8$  Hz, 2H), 2.10–1.90 (m, 3H), 1.48–1.38 (m, 1H), 1.35–1.17 (m, 15H), 0.88 (t,  $J = 6.8$  Hz, 3H);  $^{13}\text{C}$  NMR (100 MHz,  $\text{CDCl}_3$ ):  $\delta$  143.2, 139.5, 132.5, 131.6, 129.8, 128.4, 128.2, 114.3, 43.6, 38.3, 35.0, 34.6, 31.9, 30.1, 29.7, 29.6, 29.3, 27.1, 22.7, 14.1; MS (DART)  $m/z$  (relative intensity, %): 333 ( $[\text{M}+\text{H}]^+$ , 70), 297 (69), 167 (100); HRMS (DART)  $m/z$   $[\text{M}+\text{H}]^+$  Calcd for  $\text{C}_{22}\text{H}_{34}\text{Cl}$  333.2349; Found 333.2362.

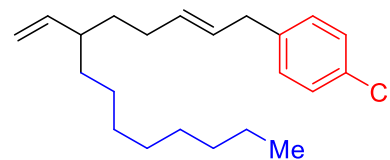

**1-Chloro-4-octylbenzene (4ae):**<sup>S11</sup>

$^1\text{H}$  NMR (400 MHz,  $\text{CDCl}_3$ ):  $\delta$  7.23 (d,  $J = 8.0$  Hz, 2H), 7.09 (d,  $J = 8.0$  Hz, 2H), 2.56 (t,  $J = 8.0$  Hz, 2H), 1.60–1.53 (m, 2H), 1.35–1.20 (m, 10H), 0.88 (t,  $J = 6.8$  Hz, 3H);  $^{13}\text{C}$  NMR (100 MHz,  $\text{CDCl}_3$ ):  $\delta$  141.3, 131.2, 129.7, 128.3, 35.3, 31.9, 31.4, 29.4, 29.23, 29.18, 22.7, 14.1; MS (DART)  $m/z$  (relative intensity, %): 225 ( $[\text{M}+\text{H}]^+$ , 1), 221 (100); HRMS (DART)  $m/z$   $[\text{M}+\text{H}]^+$  Calcd for  $\text{C}_{14}\text{H}_{22}\text{Cl}$  225.1410; Found 225.1401.

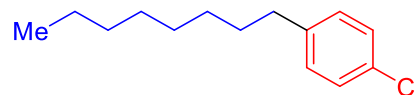

**The reaction of 1-fluorooctane (1a) with 4-dimethylaminophenylmagnesium bromide (2f)**

The representative general procedure was followed using 1-fluorooctane (132.0 mg, 1.00 mmol),

4-dimethylaminophenylmagnesium bromide (in THF, 0.52 M, 3.8 mL, 2.0 mmol), and 1,3-butadiene (68 mL as gas, 3 mmol) in THF (total 3 mL) at 30 °C for 24 h. Purification by GPC gave the desired product **3af** as a yellow oil (79.7 mg, 23%) accompanied by the cross-coupling product **4af** as a pale yellow oil (180.5 mg, 77%).

**(E)-1-(4-Dimethylaminophenyl)-6-vinyltetradec-2-ene (3af):**

<sup>1</sup>H NMR (400 MHz, CDCl<sub>3</sub>): δ 7.05 (d, *J* = 8.4 Hz, 2H), 6.70 (d, *J* = 8.4 Hz, 2H), 5.55–5.43 (m, 3H), 4.97–4.90 (m, 2H), 3.22 (d, *J* = 6.0 Hz, 2H), 2.90 (s, 6H), 2.10–1.90 (m, 3H), 1.48–1.38 (m, 1H), 1.35–1.17 (m, 15H), 0.88 (t, *J* = 6.8 Hz, 3H); <sup>13</sup>C NMR (100 MHz, CDCl<sub>3</sub>): δ 149.1, 143.3, 131.2, 129.6, 129.3, 129.0, 114.1, 113.1, 43.6, 40.9, 38.0, 35.0, 34.8, 31.9, 30.1, 29.8, 29.6, 29.3, 27.1, 22.7, 14.1; MS (DART) *m/z* (relative intensity, %): 342 ([M+H]<sup>+</sup>, 100), 332 (14), 176 (16); HRMS (DART) *m/z* [M+H]<sup>+</sup> Calcd for C<sub>24</sub>H<sub>40</sub>N 342.3161; Found 342.3152.

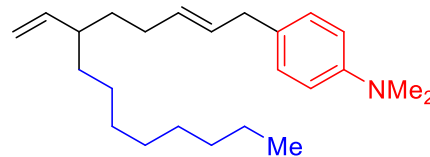

**1-Dimethylamino-4-octylbenzene (4af):**<sup>S13</sup>

<sup>1</sup>H NMR (400 MHz, CDCl<sub>3</sub>): δ 7.05 (d, *J* = 8.4 Hz, 2H), 6.70 (d, *J* = 8.4 Hz, 2H), 2.90 (s, 6H), 2.50 (t, *J* = 7.6 Hz, 2H), 1.56 (quint, *J* = 7.6 Hz, 2H), 1.35–1.22 (m, 10H), 0.88 (t, *J* = 6.8 Hz, 3H); <sup>13</sup>C NMR (100 MHz, CDCl<sub>3</sub>): δ 148.9, 131.3, 128.9, 113.0, 41.0, 34.9, 31.9, 31.8, 29.5, 29.4, 29.3, 22.7, 14.1; MS (DART) *m/z* (relative intensity, %): 234 ([M+H]<sup>+</sup>, 100), 230 (25); HRMS (DART) *m/z* [M+H]<sup>+</sup> Calcd for C<sub>16</sub>H<sub>28</sub>N 234.2222; Found 234.2227.

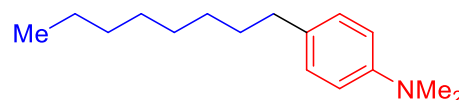

**The reaction of 1-fluorooctane (1a) with 3-methylphenylmagnesium bromide (2g)**

The representative general procedure was followed using 1-fluorooctane (129.7 mg, 0.98 mmol), 3-methylphenylmagnesium bromide (in THF, 0.83 M, 2.4 mL, 2.0 mmol), and 1,3-butadiene (68 mL as gas, 3 mmol) in THF (total 3 mL) at 30 °C for 24 h. Purification by GPC gave the desired product **3ag** as a colorless oil (105.7 mg, 35%) accompanied by the cross-coupling product **4ag** as a colorless oil (122.6 mg, 61%).

**(E)-1-(3-Methylphenyl)-6-vinyltetradec-2-ene (3ag):**

<sup>1</sup>H NMR (400 MHz, CDCl<sub>3</sub>): δ 7.17 (t, *J* = 7.6 Hz, 1H), 7.00–6.97 (m, 3H), 5.56–5.46 (m, 3H), 4.97–4.89 (m, 2H), 3.28 (d, *J* = 6.0 Hz, 2H), 2.32 (s, 3H), 2.10–1.90 (m, 3H), 1.48–1.38 (m, 1H), 1.35–1.17 (m, 15H), 0.88 (t, *J* = 6.8 Hz, 3H); <sup>13</sup>C NMR (100 MHz, CDCl<sub>3</sub>): δ 143.3, 141.0, 137.9, 131.8, 129.2, 128.9, 128.2, 126.6, 125.4, 114.2, 43.6, 39.0, 35.0, 34.7, 31.9, 30.1, 29.8, 29.6, 29.3, 27.1, 22.7, 21.4, 14.1; MS (DART) *m/z* (relative intensity, %): 313 ([M+H]<sup>+</sup>, 100), 195 (19), 156 (35), 105 (27); HRMS (DART) *m/z* [M+H]<sup>+</sup> Calcd for C<sub>23</sub>H<sub>37</sub> 313.2895; Found 313.2880.

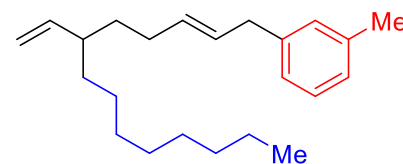

**3-Methyl-1-octylbenzene (4ag):**<sup>S11</sup>

<sup>1</sup>H NMR (400 MHz, CDCl<sub>3</sub>): δ 7.16 (t, *J* = 7.6 Hz, 1H), 6.99–6.97

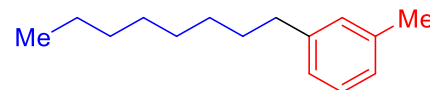



(m, 3H), 2.55 (t,  $J = 7.6$  Hz, 2H), 2.32 (s, 3H), 1.59 (quin,  $J = 7.6$  Hz, 2H), 1.35–1.22 (m, 10H), 0.88 (t,  $J = 6.8$  Hz, 3H);  $^{13}\text{C}$  NMR (100 MHz,  $\text{CDCl}_3$ ):  $\delta$  142.9, 137.7, 129.2, 128.1, 126.3, 125.4, 35.9, 31.9, 31.6, 29.5, 29.4, 29.3, 22.7, 21.4, 14.1; MS (DART)  $m/z$  (relative intensity, %): 195 ( $[\text{M}+\text{H}]^+$ , 11), 145 (20), 131 (17), 119 (19), 105 (42); HRMS (DART)  $m/z$   $[\text{M}+\text{H}]^+$  Calcd for  $\text{C}_{15}\text{H}_{25}$  205.1956; Found 205.1975.

### The reaction of 1-fluorooctane (1a) with 3-methoxyphenylmagnesium bromide (2h)

The representative general procedure was followed using 1-fluorooctane (130.5 mg, 0.99 mmol), 3-methoxyphenylmagnesium bromide (in THF, 0.97 M, 2.1 mL, 2.0 mmol), and 1,3-butadiene (68 mL as gas, 3 mmol) in THF (total 3 mL) at 30 °C for 24 h. Purification by GPC gave the desired product **3ah** as a colorless oil (131.6 mg, 40%) accompanied by the cross-coupling product **4ah** as a colorless oil (131.3 mg, 60%).

#### (E)-1-(3-Methoxyphenyl)-6-vinyltetradec-2-ene (3ah):

$^1\text{H}$  NMR (400 MHz,  $\text{CDCl}_3$ ):  $\delta$  7.22–7.18 (m, 1H), 6.77 (d,  $J = 8.0$  Hz, 1H), 6.74–6.73 (m, 2H), 5.57–5.46 (m, 3H), 4.97–4.89 (m, 2H), 3.79 (s, 3H), 3.30 (d,  $J = 5.6$  Hz, 2H), 2.11–1.90 (m, 3H), 1.48–1.38

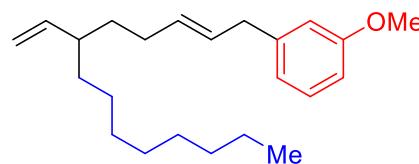

(m, 1H), 1.35–1.17 (m, 15H), 0.88 (t,  $J = 6.8$  Hz, 3H);  $^{13}\text{C}$  NMR (100 MHz,  $\text{CDCl}_3$ ):  $\delta$  159.6, 143.2, 142.8, 132.1, 129.2, 128.5, 120.9, 114.21, 114.16, 111.1, 55.1, 43.6, 39.1, 35.0, 34.7, 31.9, 30.1, 29.8, 29.6, 29.3, 27.1, 22.7, 14.1; MS (DART)  $m/z$  (relative intensity, %): 329 ( $[\text{M}+\text{H}]^+$ , 100), 206 (15), 147 (12), 121 (41); HRMS (DART)  $m/z$   $[\text{M}+\text{H}]^+$  Calcd for  $\text{C}_{23}\text{H}_{37}\text{O}$  329.2844; Found 329.2820.

#### 1-Methoxy-3-octylbenzene (4ah):<sup>S14</sup>

$^1\text{H}$  NMR (400 MHz,  $\text{CDCl}_3$ ):  $\delta$  7.19 (t,  $J = 8.0$  Hz, 1H), 6.77 (d,  $J = 8.0$  Hz, 1H), 6.73–6.71 (m, 2H), 3.79 (s, 3H), 2.57 (t,  $J = 8.0$  Hz, 2H), 1.62–1.58 (m, 2H), 1.35–1.22 (m, 10H), 0.88 (t,  $J = 6.8$  Hz, 3H);  $^{13}\text{C}$  NMR (100 MHz,  $\text{CDCl}_3$ ):  $\delta$  159.5, 144.6, 129.1, 120.8, 114.1, 110.8, 55.1, 36.0, 31.9, 31.4, 29.5, 29.34, 29.25, 22.7, 14.1; MS (DART)  $m/z$  (relative intensity, %): 221 ( $[\text{M}+\text{H}]^+$ , 100), 217 (17), 121 (11); HRMS (DART)  $m/z$   $[\text{M}+\text{H}]^+$  Calcd for  $\text{C}_{15}\text{H}_{25}\text{O}$  221.1905; Found 221.1908.

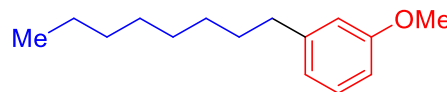

### The reaction of 4-(2-fluoroethyl)-1-tosylpiperidine (1g) with phenylmagnesium bromide (2b)

The representative general procedure was followed in 0.5 mmol scale using 4-(2-fluoroethyl)-1-tosylpiperidine (142.5 mg, 0.50 mmol), phenylmagnesium bromide (in THF, 0.82 M, 1.2 mL, 1.0 mmol), and 1,3-butadiene (34 mL as gas, 1.5 mmol) in THF (total 1.5 mL) at 30 °C for 42 h. Purification by GPC gave the desired product **3gb** as a colorless oil (107.8 mg, 48%) accompanied by the cross-coupling product **4gb** as a white solid (40.2 mg, 23%).

#### (E)-4-(8-Phenyl-3-vinyloct-6-en-1-yl)-1-tosylpiperidine (3gb):

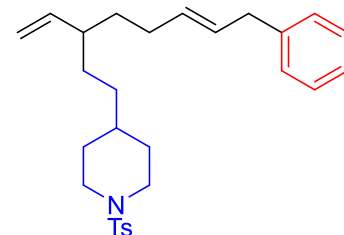

$^1\text{H}$  NMR (400 MHz,  $\text{CDCl}_3$ ):  $\delta$  7.63 (d,  $J$  = 8.4 Hz, 2H), 7.31 (d,  $J$  = 8.4 Hz, 2H), 7.28 (d,  $J$  = 7.6 Hz, 2H), 7.25–7.15 (m, 3H), 5.52–5.42 (m, 3H), 4.96–4.86 (m, 2H), 3.75 (d,  $J$  = 11.6 Hz, 2H), 3.30 (d,  $J$  = 6.0 Hz, 2H), 2.43 (s, 3H), 2.18 (t,  $J$  = 11.6 Hz, 2H), 2.10–1.83 (m, 3H), 1.68 (d,  $J$  = 12.8 Hz, 2H), 1.45–1.03 (m, 9H);  $^{13}\text{C}$  NMR (100 MHz,  $\text{CDCl}_3$ ):  $\delta$  143.3, 142.7, 141.0, 133.1, 131.7, 129.5, 128.9, 128.4, 128.3, 127.7, 125.8, 114.7, 46.5, 43.6, 39.0, 35.2, 34.6, 33.5, 31.8, 31.6, 31.4, 30.0, 21.5; MS (EI)  $m/z$  (relative intensity, %): 451 ( $[\text{M}]^+$ , 15), 297 (20), 296 (87), 262 (17), 249 (28), 237 (14), 236 (100); HRMS (EI)  $m/z$   $[\text{M}]^+$  Calcd for  $\text{C}_{28}\text{H}_{37}\text{NO}_2\text{S}$  451.2545; Found 451.2547.

#### 4-(2-Phenylethyl)-1-tosylpiperidine (4gb):

mp = 130–131 °C;  $^1\text{H}$  NMR (400 MHz,  $\text{CDCl}_3$ ):  $\delta$  7.63 (d,  $J$  = 8.4 Hz, 2H), 7.31 (d,  $J$  = 8.4 Hz, 2H), 7.27 (d,  $J$  = 8.4 Hz, 2H), 7.23–7.12 (m, 3H), 3.76 (d,  $J$  = 11.2 Hz, 2H), 2.58 (t,  $J$  = 8.0 Hz, 2H), 2.43 (s, 3H), 2.19 (td,  $J$  = 12.0, 2.4 Hz, 2H), 1.76 (dd,  $J$  = 12.8, 2.0 Hz, 2H), 1.58–1.52 (m, 2H), 1.34 (qd,  $J$  = 11.6, 4.0 Hz, 2H), 1.19–1.14 (m, 1H);  $^{13}\text{C}$  NMR (100 MHz,  $\text{CDCl}_3$ ):  $\delta$  143.4, 142.1, 133.0, 129.5, 128.4, 128.3, 127.7, 125.8, 46.4, 37.7, 34.4, 32.7, 31.4, 21.5; MS (EI)  $m/z$  (relative intensity, %): 343 ( $[\text{M}]^+$ , 39), 236 (11), 189 (15), 188 (100); HRMS (EI)  $m/z$   $[\text{M}]^+$  Calcd for  $\text{C}_{20}\text{H}_{25}\text{NO}_2\text{S}$  343.1606; Found 343.1603.

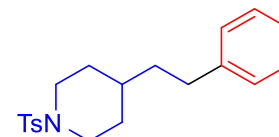

#### The reaction of 4-(2-fluoroethyl)-1-tosylpiperidine (1g) with 4-methylphenylmagnesium bromide (2c)

The representative general procedure was followed in 0.5 mmol scale using 4-(2-fluoroethyl)-1-tosylpiperidine (142.5 mg, 0.50 mmol), 4-methylphenylmagnesium bromide (in THF, 0.73 M, 1.4 mL, 1.0 mmol), and 1,3-butadiene (34 mL as gas, 1.5 mmol) in THF (total 1.5 mL) at 30 °C for 42 h. Purification by GPC gave the desired product **3gc** as a colorless oil (88.7 mg, 38%) accompanied by the cross-coupling product **4gc** as a white solid (39.3 mg, 22%).

#### (E)-4-[8-(4-Methylphenyl)-3-vinyloct-6-en-1-yl]-1-tosylpiperidine (3gc):

$^1\text{H}$  NMR (400 MHz,  $\text{CDCl}_3$ ):  $\delta$  7.63 (d,  $J$  = 8.0 Hz, 2H), 7.31 (d,  $J$  = 8.0 Hz, 2H), 7.09 (d,  $J$  = 8.0 Hz, 2H), 7.05 (d,  $J$  = 8.0 Hz, 2H), 5.50–5.42 (m, 3H), 4.96–4.86 (m, 2H), 3.75 (d,  $J$  = 12.4 Hz, 2H), 3.26 (d,  $J$  = 6.8 Hz, 2H), 2.43 (s, 3H), 2.31 (s, 3H), 2.18 (td,  $J$  = 12.0, 2.0 Hz, 2H), 2.08–1.83 (m, 3H), 1.68 (d,  $J$  = 12.8 Hz, 2H), 1.43–1.03 (m, 9H);  $^{13}\text{C}$  NMR (100 MHz,  $\text{CDCl}_3$ ):  $\delta$  143.3, 142.8, 137.9, 135.3, 133.1, 131.5, 129.5, 129.2, 129.0, 128.3, 127.7, 114.7, 46.5, 43.7, 38.6, 35.2, 34.7, 33.5, 31.8, 31.6, 31.4, 30.1, 21.5, 21.0; MS (EI)  $m/z$  (relative intensity, %): 465 ( $[\text{M}]^+$ , 12), 311 (25), 310 (100); HRMS (EI)  $m/z$   $[\text{M}]^+$  Calcd for  $\text{C}_{29}\text{H}_{39}\text{NO}_2\text{S}$  465.2702; Found 465.2698.

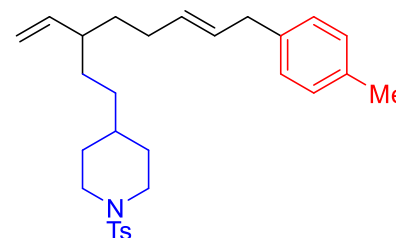

#### 4-[2-(4-Methylphenyl)ethyl]-1-tosylpiperidine (4gc):

mp = 135–137 °C;  $^1\text{H}$  NMR (400 MHz,  $\text{CDCl}_3$ ):  $\delta$  7.63 (d,  $J$  = 8.0 Hz, 2H), 7.31 (d,  $J$  = 8.0 Hz, 2H), 7.06 (d,  $J$  = 8.0 Hz, 2H), 7.01 (d,  $J$  = 8.0 Hz, 2H),

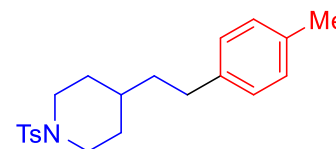

3.76 (d,  $J = 12.0$  Hz, 2H), 2.54 (t,  $J = 8.0$  Hz, 2H), 2.42 (s, 3H), 2.29 (s, 3H), 2.18 (td,  $J = 12.0, 2.4$  Hz, 2H), 1.75 (dd,  $J = 12.8, 2.4$  Hz, 2H), 1.64–1.49 (m, 2H), 1.33 (qd,  $J = 12.0, 4.0$  Hz, 2H), 1.19–1.14 (m, 1H);  $^{13}\text{C}$  NMR (100 MHz,  $\text{CDCl}_3$ ):  $\delta$  143.3, 138.9, 135.2, 133.0, 129.5, 129.0, 128.1, 127.7, 46.4, 37.7, 34.3, 32.2, 31.3, 21.5, 20.9; MS (EI)  $m/z$  (relative intensity, %): 357 ( $[\text{M}]^+$ , 21), 236 (11), 203 (16), 202 (100); HRMS (EI)  $m/z$   $[\text{M}]^+$  Calcd for  $\text{C}_{21}\text{H}_{27}\text{NO}_2\text{S}$  357.1762; Found 357.1765.

### The reaction of 4-(2-fluoroethyl)-1-tosylpiperidine (1g) with 3-methylphenylmagnesium bromide (2g)

The representative general procedure was followed in 0.5 mmol scale using 4-(2-fluoroethyl)-1-tosylpiperidine (143.0 mg, 0.50 mmol), 3-methylphenylmagnesium bromide (in THF, 0.83 M, 1.2 mL, 1.0 mmol), and 1,3-butadiene (34 mL as gas, 1.5 mmol) in THF (total 1.5 mL) at 30 °C for 42 h. Purification by GPC gave the desired product **3gg** as a colorless oil (107.1 mg, 46%) accompanied by the cross-coupling product **4gg** as a white solid (44.3 mg, 25%).

#### (E)-4-[8-(3-Methylphenyl)-3-vinyloct-6-en-1-yl]-1-tosylpiperidine

##### (3gg):

$^1\text{H}$  NMR (400 MHz,  $\text{CDCl}_3$ ):  $\delta$  7.63 (d,  $J = 8.4$  Hz, 2H), 7.31 (d,  $J = 8.4$  Hz, 2H), 7.15 (d,  $J = 7.6$  Hz, 1H), 7.00–6.95 (m, 3H), 5.51–5.45 (m, 3H), 4.97–4.87 (m, 2H), 3.75 (d,  $J = 11.6$  Hz, 2H), 3.26 (d,  $J = 6.4$  Hz, 2H), 2.43 (s, 3H), 2.32 (s, 3H), 2.18 (td,  $J = 12.4, 2.0$  Hz, 2H), 2.04–1.83 (m, 3H), 1.68 (d,  $J = 12.8$  Hz, 2H), 1.43–1.03 (m, 9H);  $^{13}\text{C}$  NMR (100 MHz,  $\text{CDCl}_3$ ):  $\delta$  143.3, 142.7, 140.9, 137.9, 133.1, 131.6, 129.5, 129.2, 129.0, 128.2, 127.7, 126.6, 125.4, 114.7, 46.5, 43.6, 39.0, 35.2, 34.6, 33.5, 31.8, 31.6, 31.4, 30.0, 21.5, 21.4; MS (EI)  $m/z$  (relative intensity, %): 465 ( $[\text{M}]^+$ , 12), 311 (25), 310 (100); HRMS (EI)  $m/z$   $[\text{M}]^+$  Calcd for  $\text{C}_{29}\text{H}_{39}\text{NO}_2\text{S}$  465.2702; Found 465.2703.

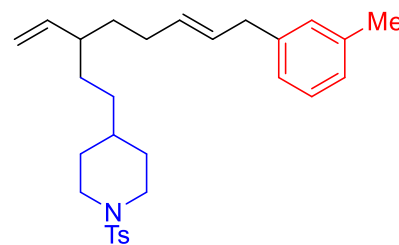

#### 4-[2-(3-Methylphenyl)ethyl]-1-tosylpiperidine (4gg):

mp = 104–106 °C;  $^1\text{H}$  NMR (400 MHz,  $\text{CDCl}_3$ ):  $\delta$  7.63 (d,  $J = 8.0$  Hz, 2H), 7.31 (d,  $J = 8.0$  Hz, 2H), 7.14 (t,  $J = 7.6$  Hz, 1H), 6.98–6.91 (m, 3H), 3.75 (d,  $J = 11.6$  Hz, 2H), 2.54 (t,  $J = 7.6$  Hz, 2H), 2.42 (s, 3H), 2.30 (s, 3H), 2.19 (td,  $J = 12.0, 2.4$  Hz, 2H), 1.76 (dd,  $J = 12.8, 2.4$  Hz, 2H), 1.60–1.50 (m, 2H), 1.33 (qd,  $J = 12.0, 4.0$  Hz, 2H), 1.21–1.14 (m, 1H);  $^{13}\text{C}$  NMR (100 MHz,  $\text{CDCl}_3$ ):  $\delta$  143.3, 142.0, 137.9, 133.0, 129.5, 129.0, 128.2, 127.7, 126.5, 125.2, 46.4, 37.6, 34.4, 32.6, 31.3, 21.5, 21.3; MS (EI)  $m/z$  (relative intensity, %): 357 ( $[\text{M}]^+$ , 29), 236 (15), 203 (16), 202 (100); HRMS (EI)  $m/z$   $[\text{M}]^+$  Calcd for  $\text{C}_{21}\text{H}_{27}\text{NO}_2\text{S}$  357.1762; Found 357.1760.

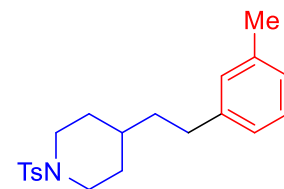

### The reaction of 4-(2-fluoroethyl)-1-tosylpiperidine (1g) with 2-thienylmagnesium bromide (2i)

The representative general procedure was followed in 0.5 mmol scale using 4-(2-fluoroethyl)-1-tosylpiperidine (142.6 mg, 0.50 mmol), 2-thienylmagnesium bromide (in THF, 0.92

M, 1.1 mL, 1.0 mmol), and 1,3-butadiene (34 mL as gas, 1.5 mmol) in THF (total 1.5 mL) at 30 °C for 42 h. Purification by GPC gave cross-coupling product **4gi** as a white solid (39.8 mg, 23%) and unreacted **1g** (62.5 mg, 44%).

**4-[2-(2-Thienyl)ethyl]-1-tosylpiperidine (4gi):**

mp = 84–85 °C; <sup>1</sup>H NMR (400 MHz, CDCl<sub>3</sub>): δ 7.63 (d, *J* = 8.0 Hz, 2H), 7.31 (d, *J* = 8.0 Hz, 2H), 7.08 (dd, *J* = 4.8, 1.2 Hz, 1H), 6.88 (dd, *J* = 4.8, 3.2 Hz, 1H), 6.73 (dd, *J* = 3.2, 1.2 Hz, 1H), 3.76 (d, *J* = 12.0 Hz, 2H), 2.81 (t, *J* = 7.6 Hz, 2H), 2.43 (s, 3H), 2.19 (td, *J* = 12.0, 2.4 Hz, 2H), 1.75 (dd, *J* = 12.8, 2.4 Hz, 2H), 1.61 (q, *J* = 7.2 Hz, 2H), 1.34 (qd, *J* = 12.8, 4.0 Hz, 2H), 1.25–1.16 (m, 1H); <sup>13</sup>C NMR (100 MHz, CDCl<sub>3</sub>): δ 144.8, 143.3, 132.9, 129.5, 127.6, 126.6, 124.0, 122.9, 46.3, 37.7, 34.1, 31.2, 26.8, 21.5; MS (EI) *m/z* (relative intensity, %): 349 ([M]<sup>+</sup>, 1), 285 (42), 284 (33), 266 (59), 155 (43), 130 (100); HRMS (EI) *m/z* [M]<sup>+</sup> Calcd for C<sub>18</sub>H<sub>23</sub>NO<sub>2</sub>S<sub>2</sub> 349.1170; Found 349.1168.

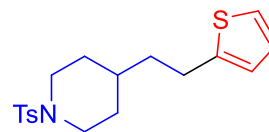

**The reaction of 4-(2-fluoroethyl)-1-tosylpiperidine (1g) with 2-methylphenylmagnesium bromide (2j)**

The representative general procedure was followed in 0.5 mmol scale using 4-(2-fluoroethyl)-1-tosylpiperidine (143.6 mg, 0.50 mmol), 2-methylphenylmagnesium bromide (in THF, 0.82 M, 1.2 mL, 1.0 mmol), and 1,3-butadiene (34 mL as gas, 1.5 mmol) in THF (total 1.5 mL) at 30 °C for 42 h. Purification by GPC gave the desired product **3gj** as a colorless oil (200.2 mg, 85%).

**(E)-4-[8-(2-Methylphenyl)-3-vinyloct-6-en-1-yl]-1-tosylpiperidine (3gj):**<sup>S1</sup>

<sup>1</sup>H NMR (400 MHz, CDCl<sub>3</sub>): δ 7.63 (d, *J* = 8.4 Hz, 2H), 7.31 (d, *J* = 8.4 Hz, 2H), 7.11 (br s, 4H), 5.52–5.35 (m, 3H), 4.96–4.85 (m, 2H), 3.74 (d, *J* = 11.2 Hz, 2H), 3.27 (d, *J* = 6.4 Hz, 2H), 2.42 (s, 3H), 2.27 (s, 3H), 2.17 (td, *J* = 12.0, 2.0 Hz, 2H), 2.04–1.81 (m, 3H), 1.68 (d, *J* = 12.8 Hz, 2H), 1.42–1.01 (m, 9H); <sup>13</sup>C NMR (100 MHz, CDCl<sub>3</sub>): δ 143.3, 142.7, 139.0, 136.2, 133.0, 131.5, 130.0, 129.5, 128.8, 128.0, 127.7, 126.0, 125.9, 114.6, 46.5, 43.6, 36.5, 35.1, 34.6, 33.5, 31.7, 31.6, 31.3, 30.1, 21.5, 19.3; MS (EI) *m/z* (relative intensity, %): 465 ([M]<sup>+</sup>, 16), 311 (24), 310 (97), 262 (21), 249 (42), 237 (14), 236 (100); HRMS (EI) *m/z* [M]<sup>+</sup> Calcd for C<sub>29</sub>H<sub>39</sub>NO<sub>2</sub>S 465.2699; Found 465.2698.

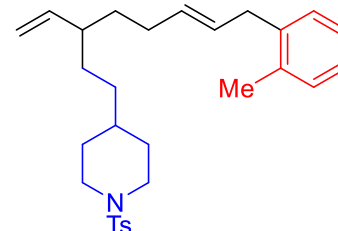

**(E)-1-(2-Methylphenyl)-6-vinyltetradec-2-ene (3aj):**<sup>S1</sup>

Following the general procedure, reaction was conducted in 1 mmol scale using 1-fluorooctane (130.4 mg, 0.99 mmol) and 2-methylphenylmagnesium bromide (in THF, 0.82 M, 1.83 mL, 1.5 mmol).

Purification by GPC gave the desired product as a colorless oil (265.1 mg, 86%): <sup>1</sup>H NMR (400 MHz, CDCl<sub>3</sub>): δ 7.12–7.10 (m, 4H), 5.54–5.38 (m, 3H), 4.96–4.88 (m, 2H), 3.29 (d, *J* = 6.0 Hz, 2H), 2.28 (s,

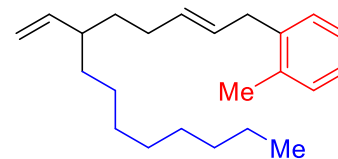

3H), 2.08–1.87 (m, 3H), 1.47–1.17 (m, 16H), 0.88 (t,  $J = 6.8$  Hz, 3H):  $^{13}\text{C}$  NMR (100 MHz,  $\text{CDCl}_3$ ):  $\delta$  143.3, 139.1, 136.2, 131.8, 130.0, 128.9, 127.9, 126.0, 125.9, 114.2, 43.6, 36.6, 35.0, 34.8, 31.9, 30.2, 29.7, 29.6, 29.3, 27.1, 22.7, 19.3, 14.1; MS (DART)  $m/z$  (relative intensity, %): 313 ( $[\text{M}+\text{H}]^+$ , 5), 283 (60), 265 (32), 225 (20), 195 (13), 118 (56), 102 (100); HRMS (DART)  $m/z$   $[\text{M}+\text{H}]^+$  Calcd for  $\text{C}_{23}\text{H}_{37}$  313.2895; Found 313.2912.

**(E)-1-(2-Ethylphenyl)-6-vinyltetradec-2-ene (3ak):<sup>S1</sup>**

Following the general procedure, reaction was conducted in 1 mmol scale using 1-fluorooctane (130.7 mg, 0.99 mmol) and 2-ethylphenylmagnesium bromide (in THF, 1.03 M, 1.46 mL, 1.5 mmol). Purification by GPC gave the desired product as a colorless oil (288.3 mg, 89%):  $^1\text{H}$  NMR (400 MHz,  $\text{CDCl}_3$ ):  $\delta$  7.16–7.14 (m, 4H), 5.56–5.39 (m, 3H), 4.96–4.88 (m, 2H), 3.33 (d,  $J = 6.6$  Hz, 2H), 2.64 (q,  $J = 7.6$  Hz, 2H), 2.08–1.89 (m, 3H), 1.45–1.36 (m, 1H), 1.32–1.19 (m, 15H), 1.20 (t,  $J = 7.6$  Hz, 3H), 0.88 (t,  $J = 6.8$  Hz, 3H);  $^{13}\text{C}$  NMR (100 MHz,  $\text{CDCl}_3$ ):  $\delta$  143.3, 142.0, 138.4, 131.7, 129.3, 128.6, 128.3, 126.2, 125.8, 114.2, 43.6, 35.8, 35.0, 34.7, 31.9, 30.2, 29.7, 29.6, 29.3, 27.1, 25.5, 22.7, 15.1, 14.1; MS (DART)  $m/z$  (relative intensity, %): 327 ( $[\text{M}+\text{H}]^+$ , 100), 251 (92), 195 (35), 151 (24), 133 (87); HRMS (DART)  $m/z$   $[\text{M}+\text{H}]^+$  Calcd for  $\text{C}_{24}\text{H}_{39}$  327.3052; Found 327.3057.

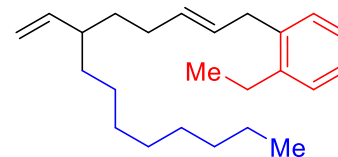

**(E)-1-(2-Isopropylphenyl)-6-vinyltetradec-2-ene (3al):<sup>S1</sup>**

Following the general procedure, reaction was conducted in 1 mmol scale using 1-fluorooctane (137.9 mg, 1.04 mmol) and 2-isopropylphenylmagnesium bromide (in THF, 0.97 M, 1.55 mL, 1.5 mmol). Purification by GPC gave the desired product as a colorless oil (303.2 mg, 85%):  $^1\text{H}$  NMR (400 MHz,  $\text{CDCl}_3$ ):  $\delta$  7.26 (d,  $J = 7.2$  Hz, 1H), 7.19 (td,  $J = 6.4$  Hz, 1H), 7.12–7.10 (m, 2H), 5.53–5.44 (m, 3H), 4.96–4.88 (m, 2H), 3.36 (d,  $J = 5.6$  Hz, 2H), 3.18 (sept,  $J = 6.8$  Hz, 1H), 2.05–1.90 (m, 3H), 1.44–1.35 (m, 1H), 1.36–1.17 (m, 15H), 1.21 (d,  $J = 6.8$  Hz, 6H), 0.88 (t,  $J = 6.8$  Hz, 3H);  $^{13}\text{C}$  NMR (100 MHz,  $\text{CDCl}_3$ ):  $\delta$  146.7, 143.2, 137.5, 131.5, 129.5, 129.0, 126.4, 125.6, 125.2, 114.2, 43.6, 35.9, 35.0, 34.7, 31.9, 30.2, 29.8, 29.6, 29.3, 28.6, 27.1, 23.8, 22.7, 14.1; MS (DART)  $m/z$  (relative intensity, %): 341 ( $[\text{M}+\text{H}]^+$ , 32), 327 (17), 251 (34), 195 (18), 163 (17), 147 (45), 102 (100); HRMS (DART)  $m/z$   $[\text{M}+\text{H}]^+$  Calcd for  $\text{C}_{25}\text{H}_{41}$  341.3208; Found 341.3237.

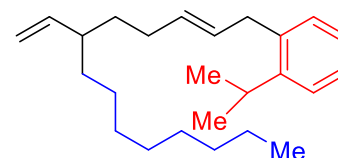

**(E)-1-(2,6-Dimethylphenyl)-6-vinyltetradec-2-ene (3am):<sup>S1</sup>**

Following the general procedure, reaction was conducted in 1 mmol scale using 1-fluorooctane (136.0 mg, 1.03 mmol) and 2,6-dimethylphenylmagnesium bromide (in THF, 0.83 M, 1.81 mL, 1.5 mmol). Purification by GPC gave the desired product as a colorless oil

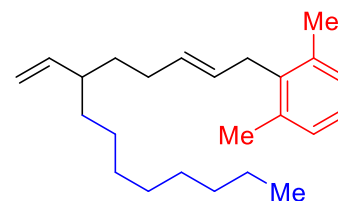

(302.7 mg, 90%):  $^1\text{H}$  NMR (400 MHz,  $\text{CDCl}_3$ ):  $\delta$  7.00 (br s, 3H), 5.51–5.40 (m, 2H), 5.30–5.23 (m, 1H), 4.94–4.86 (m, 2H), 3.31 (d,  $J = 5.6$  Hz, 2H), 2.29 (s, 6H), 2.04–1.85 (m, 3H), 1.36–1.17 (m, 16H), 0.88 (t,  $J = 6.8$  Hz, 3H);  $^{13}\text{C}$  NMR (100 MHz,  $\text{CDCl}_3$ ):  $\delta$  143.3, 137.1, 136.5, 130.9, 127.9, 126.4, 125.8, 114.1, 43.6, 34.9, 34.7, 32.6, 31.9, 30.1, 29.7, 29.6, 29.3, 27.1, 22.7, 19.9, 14.1; MS (DART)  $m/z$  (relative intensity, %): 327 ( $[\text{M}+\text{H}]^+$ , 45), 215 (17), 207 (12), 195 (15), 133 (37), 102 (100); HRMS (DART)  $m/z$   $[\text{M}+\text{H}]^+$  Calcd for  $\text{C}_{24}\text{H}_{39}$  327.3052; Found 327.3045.

**(E)-1-(4-Fluoro-2-methylphenyl)-6-vinyltetradec-2-ene (3ao):**<sup>S1</sup>

Following the general procedure, reaction was conducted in 1 mmol scale using 1-fluorooctane (125.8 mg, 0.95 mmol) and 4-fluoro-2-methylphenylmagnesium bromide (in THF, 0.48 M, 3.1 mL, 1.5 mmol). Purification by GPC gave the desired product as a colorless oil (242.9 mg, 77%):  $^1\text{H}$  NMR (400 MHz,  $\text{CDCl}_3$ ):  $\delta$  7.05 (dd,  $J = 8.0, 6.0$  Hz, 1H), 6.85–6.79 (m, 2H), 5.54–5.45 (m, 2H), 5.41–5.34 (m, 1H), 4.96–4.88 (m, 2H), 3.24 (d,  $J = 6.0$  Hz, 2H), 2.26 (s, 3H), 2.10–1.89 (m, 3H), 1.44–1.36 (m, 1H), 1.31–1.17 (m, 15H), 0.88 (t,  $J = 6.8$  Hz, 3H);  $^{13}\text{C}$  NMR (100 MHz,  $\text{CDCl}_3$ ):  $\delta$  162.4, 160.0, 143.2, 138.4, 138.3, 134.7, 134.6, 131.9, 130.2, 130.1, 127.7, 116.7, 116.5, 114.23, 114.21, 112.5, 112.2, 43.61, 43.59, 35.8, 35.0, 34.7, 31.9, 30.1, 29.7, 29.6, 29.3, 27.1, 22.7, 19.5, 19.4, 14.1;  $^{19}\text{F}$  NMR (376 MHz,  $\text{CDCl}_3$ ):  $\delta$  -118.1 (s); MS (DART)  $m/z$  (relative intensity, %): 331 ( $[\text{M}+\text{H}]^+$ , 35), 273 (32), 251 (32), 197 (100), 195 (50), 153 (54); HRMS (DART)  $m/z$   $[\text{M}+\text{H}]^+$  Calcd for  $\text{C}_{23}\text{H}_{36}\text{F}$  331.2801; Found 331.2792.

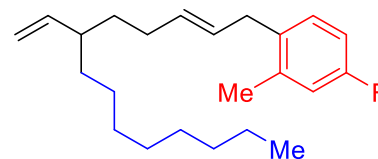

**(E)-1-(4-Chloro-2-methylphenyl)-6-vinyltetradec-2-ene (3ap):**<sup>S1</sup>

Following the general procedure, reaction was conducted in 1 mmol scale using 1-fluorooctane (137.4 mg, 1.04 mmol) and 4-chloro-2-methylphenylmagnesium bromide (in THF, 0.48 M, 3.1 mL, 1.5 mmol). Purification by GPC gave the desired product as a colorless oil (236.5 mg, 66%):  $^1\text{H}$  NMR (400 MHz,  $\text{CDCl}_3$ ):  $\delta$  7.12–7.09 (m, 2H), 7.04 (d,  $J = 8.4$  Hz, 1H), 5.53–5.44 (m, 2H), 5.41–5.34 (m, 1H), 4.97–4.88 (m, 2H), 3.24 (d,  $J = 6.0$  Hz, 2H), 2.25 (s, 3H), 2.10–1.89 (m, 3H), 1.44–1.36 (m, 1H), 1.31–1.17 (m, 15H), 0.88 (t,  $J = 6.8$  Hz, 3H);  $^{13}\text{C}$  NMR (100 MHz,  $\text{CDCl}_3$ ):  $\delta$  143.2, 138.1, 137.5, 132.2, 131.4, 130.2, 129.8, 127.3, 125.9, 114.2, 43.6, 35.9, 35.0, 34.7, 31.9, 30.2, 29.7, 29.6, 29.3, 27.1, 22.7, 19.2, 14.1; MS (DART)  $m/z$  (relative intensity, %): 347 ( $[\text{M}+\text{H}]^+$ , 65), 331 (100), 305 (25), 273 (40), 251 (50), 197 (24); HRMS (DART)  $m/z$   $[\text{M}+\text{H}]^+$  Calcd for  $\text{C}_{23}\text{H}_{36}\text{Cl}$  347.2506; Found 347.2495.

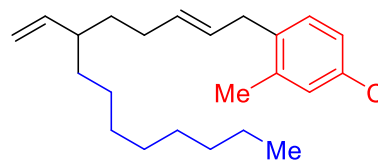

**(E)-1-(2,4-Dimethylphenyl)-6-vinyltetradec-2-ene (3aq):**<sup>S1</sup>

Following the general procedure, reaction was conducted in 1 mmol scale using 1-fluorooctane (129.2 mg, 0.98 mmol) and 2,4-dimethylphenylmagnesium bromide (in THF, 0.54 M, 2.8 mL, 1.5

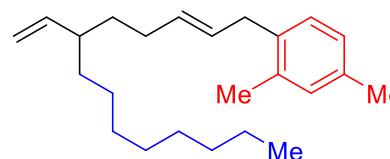

mmol). Purification by GPC gave the desired product as a colorless oil (304.8 mg, 96%):  $^1\text{H}$  NMR (400 MHz,  $\text{CDCl}_3$ ):  $\delta$  7.01 (d,  $J = 7.6$  Hz, 1H), 6.95 (s, 1H), 6.94 (d,  $J = 7.6$  Hz, 1H), 5.53–5.46 (m, 2H), 5.44–5.35 (m, 1H), 4.96–4.88 (m, 2H), 3.25 (d,  $J = 6.4$  Hz, 2H), 2.28 (s, 3H), 2.24 (s, 3H), 2.10–1.85 (m, 3H), 1.43–1.36 (m, 1H), 1.31–1.17 (m, 15H), 0.88 (t,  $J = 6.8$  Hz, 3H);  $^{13}\text{C}$  NMR (100 MHz,  $\text{CDCl}_3$ ):  $\delta$  143.3, 136.0, 135.4, 131.5, 130.9, 128.9, 128.1, 126.6, 114.2, 43.6, 36.2, 35.0, 34.7, 31.9, 30.2, 29.8, 29.6, 29.4, 27.1, 22.7, 20.9, 19.3, 14.1; MS (EI)  $m/z$  (relative intensity, %): 326 ( $[\text{M}]^+$ , 6), 172 (9), 157 (22), 143 (18), 132 (69), 119 (100); HRMS (EI)  $m/z$   $[\text{M}]^+$  Calcd for  $\text{C}_{24}\text{H}_{38}$  326.2974; Found 326.2970.

**(E)-1-(4-Methoxy-2-methylphenyl)-6-vinyltetradec-2-ene (3ar):<sup>S1</sup>**

Following the general procedure, reaction was conducted in 1 mmol scale using 1-fluorooctane (131.7 mg, 1.00 mmol) and 4-methoxy-2-methylphenylmagnesium bromide (in THF, 0.51 M, 3.0 mL, 1.5 mmol). Purification by GPC gave the desired product as a colorless oil (227.1 mg, 67%):  $^1\text{H}$  NMR (400 MHz,  $\text{CDCl}_3$ ):  $\delta$  7.03 (d,  $J = 8.0$  Hz, 1H), 6.70–6.67 (m, 2H), 5.54–5.45 (m, 2H), 5.41–5.34 (m, 1H), 4.96–4.88 (m, 2H), 3.77 (s, 3H), 3.23 (d,  $J = 6.0$  Hz, 2H), 2.26 (s, 3H), 2.10–1.89 (m, 3H), 1.44–1.36 (m, 1H), 1.31–1.16 (m, 15H), 0.88 (t,  $J = 6.8$  Hz, 3H);  $^{13}\text{C}$  NMR (100 MHz,  $\text{CDCl}_3$ ):  $\delta$  157.8, 143.3, 137.5, 131.4, 131.3, 129.8, 128.3, 115.8, 114.2, 110.8, 55.2, 43.6, 35.8, 34.9, 34.7, 31.9, 30.1, 29.7, 29.6, 29.3, 27.1, 22.7, 19.6, 14.1; MS (DART)  $m/z$  (relative intensity, %): 343 ( $[\text{M}+\text{H}]^+$ , 95), 331 (30), 301 (10), 251 (12), 239 (14), 195 (16), 135 (100); HRMS (DART)  $m/z$   $[\text{M}+\text{H}]^+$  Calcd for  $\text{C}_{24}\text{H}_{39}\text{O}$  343.3001; Found 343.2988.

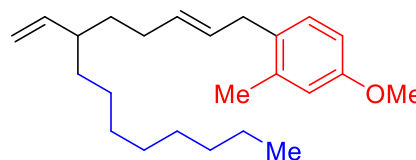

**(E)-1-(2-Methyl-1-naphthyl)-6-vinyltetradec-2-ene (3as):<sup>S1</sup>**

Following the general procedure, reaction was conducted in 1 mmol scale using 1-fluorooctane (128.2 mg, 0.97 mmol) and 2-methyl-1-naphthylmagnesium bromide (in THF, 0.15 M, 10.0 mL, 1.5 mmol) for 20 h. Purification by GPC gave the desired product as a pale orange oil (284.5 mg, 81%):  $^1\text{H}$  NMR (400 MHz,  $\text{CDCl}_3$ ):  $\delta$  8.01 (d,  $J = 8.4$  Hz, 1H), 7.79 (d,  $J = 7.2$  Hz, 1H), 7.64 (d,  $J = 8.0$  Hz, 1H), 7.46 (td,  $J = 7.2, 2.0$  Hz, 1H), 7.39 (td,  $J = 8.0, 1.2$  Hz, 1H), 7.30 (d,  $J = 8.4$  Hz, 1H), 5.57 (dt,  $J = 14.8, 5.6$  Hz, 1H), 5.48–5.39 (m, 1H), 5.34 (dt,  $J = 15.6, 6.4$  Hz, 1H), 4.91–4.81 (m, 2H), 3.76 (d,  $J = 4.4$  Hz, 2H), 2.47 (s, 3H), 2.02–1.81 (m, 3H), 1.38–1.12 (m, 16H), 0.87 (t,  $J = 6.8$  Hz, 3H);  $^{13}\text{C}$  NMR (100 MHz,  $\text{CDCl}_3$ ):  $\delta$  143.2, 133.5, 133.4, 132.5, 132.3, 131.4, 129.2, 128.4, 127.2, 126.2, 125.8, 124.4, 123.9, 114.1, 43.5, 34.9, 34.6, 31.9, 31.6, 30.1, 29.7, 29.6, 29.3, 27.1, 22.7, 20.1, 14.1; MS (DART)  $m/z$  (relative intensity, %): 363 ( $[\text{M}+\text{H}]^+$ , 100), 331 (65), 239 (14), 213 (15), 195 (48), 168 (24), 155 (56), 135 (15); HRMS (DART)  $m/z$   $[\text{M}+\text{H}]^+$  Calcd for  $\text{C}_{27}\text{H}_{39}$  363.3052; Found 363.3040.

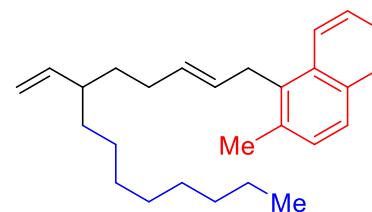

**(E)-1-(3-Methyl-2-thienyl)-6-vinyltetradec-2-ene (3at):<sup>S1</sup>**

Following the general procedure, reaction was conducted in 1 mmol scale

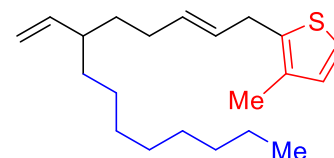

using 1-fluorooctane (126.0 mg, 0.95 mmol) and 3-methyl-2-thienylmagnesium bromide (in THF, 0.53 M, 2.8 mL, 1.5 mmol). Purification by GPC gave the desired product as a pale yellow oil (80.4 mg, 27%):  $^1\text{H}$  NMR (400 MHz,  $\text{CDCl}_3$ ):  $\delta$  7.02 (d,  $J = 4.8$  Hz, 1H), 6.79 (d,  $J = 4.8$  Hz, 1H), 5.55–5.45 (m, 3H), 4.97–4.90 (m, 2H), 3.39 (d,  $J = 5.2$  Hz, 2H), 2.14 (s, 3H), 2.11–1.80 (m, 3H), 1.57–1.38 (m, 1H), 1.33–1.18 (m, 15H), 0.88 (t,  $J = 6.8$  Hz, 3H);  $^{13}\text{C}$  NMR (100 MHz,  $\text{CDCl}_3$ ):  $\delta$  143.2, 136.9, 132.6, 132.1, 130.0, 127.6, 121.3, 114.3, 43.5, 35.0, 34.6, 31.9, 31.1, 30.0, 29.7, 29.6, 29.3, 27.1, 22.7, 14.1, 13.5; MS (DART)  $m/z$  (relative intensity, %): 319 ( $[\text{M}+\text{H}]^+$ , 25), 283 (57), 239 (85), 195 (100), 177 (10), 151 (27), 133 (31), 121 (13); HRMS (DART)  $m/z$   $[\text{M}+\text{H}]^+$  Calcd for  $\text{C}_{21}\text{H}_{35}\text{S}$  319.2460; Found 319.2460.

**(E)-2-[12-(2-Methylphenyl)-7-vinyl-10-dodecen-1-yloxy]tetrahydropyran (3bj):**<sup>S1</sup>

Following the general procedure, reaction was conducted using 2-(6-fluorohexan-1-yloxy)tetrahydropyran (105.9 mg, 0.52 mmol) and 2-methylphenylmagnesium bromide (in THF, 0.82 M, 0.91 mL, 0.75 mmol). Purification by GPC gave the desired product as a colorless oil (133.3 mg, 67%):  $^1\text{H}$  NMR (400 MHz,  $\text{CDCl}_3$ ):  $\delta$  7.12 (br s, 4H), 5.50–5.35 (m, 3H), 4.96–4.87 (m, 2H), 4.58–4.56 (m, 1H), 3.90–3.84 (m, 1H), 3.72 (dt,  $J = 9.6, 6.8$  Hz, 1H), 3.53–3.47 (m, 1H), 3.37 (dt,  $J = 9.6, 6.8$  Hz, 1H), 3.29 (d,  $J = 5.6$  Hz, 2H), 2.28 (s, 3H), 2.09–1.67 (m, 5H), 1.60–1.51 (m, 6H), 1.36–1.17 (m, 10H);  $^{13}\text{C}$  NMR (100 MHz,  $\text{CDCl}_3$ ):  $\delta$  143.2, 139.1, 136.2, 131.7, 130.0, 128.9, 127.8, 126.0, 125.9, 114.2, 98.8, 67.6, 62.3, 43.6, 36.5, 34.9, 34.7, 30.7, 30.1, 29.7, 29.5, 27.0, 26.2, 25.5, 19.7, 19.3; MS (DART)  $m/z$  (relative intensity, %): 385 ( $[\text{M}+\text{H}]^+$ , 100), 315 (22), 299 (14), 283 (13), 195 (22), 147 (32), 102 (52); HRMS (DART)  $m/z$   $[\text{M}+\text{H}]^+$  Calcd for  $\text{C}_{26}\text{H}_{41}\text{O}_2$  385.3107; Found 385.3099.

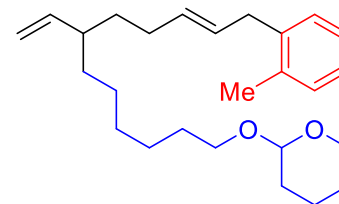

**(E)-2-[12-(2,6-Dimethylphenyl)-7-vinyl-10-dodecen-1-yloxy]tetrahydropyran (3bm):**<sup>S1</sup>

Following the general procedure, reaction was conducted using 2-(6-fluorohexan-1-yloxy)tetrahydropyran (106.3 mg, 0.52 mmol) and 2,6-dimethylphenylmagnesium bromide (in THF, 0.83 M, 0.90 mL, 0.75 mmol). Purification by GPC gave the desired product as a colorless oil (179.8 mg, 87%):  $^1\text{H}$  NMR (400 MHz,  $\text{CDCl}_3$ ):  $\delta$  7.01–7.00 (m, 3H), 5.51–5.40 (m, 2H), 5.30–5.21 (m, 1H), 4.94–4.85 (m, 2H), 4.58–4.56 (m, 1H), 3.91–3.84 (m, 1H), 3.72 (dt,  $J = 9.6, 6.8$  Hz, 1H), 3.53–3.47 (m, 1H), 3.37 (dt,  $J = 9.6, 6.8$  Hz, 1H), 3.31 (d,  $J = 5.2$  Hz, 2H), 2.29 (s, 6H), 2.02–1.67 (m, 5H), 1.60–1.48 (m, 6H), 1.40–1.15 (m, 10H);  $^{13}\text{C}$  NMR (100 MHz,  $\text{CDCl}_3$ ):  $\delta$  143.2, 137.1, 136.5, 130.8, 127.9, 126.4, 125.8, 114.2, 98.8, 67.7, 62.3, 43.5, 34.8, 34.7, 32.6, 30.8, 30.1, 29.7, 29.5, 27.0, 26.2, 25.5, 19.8, 19.7; MS (DART)  $m/z$  (relative intensity, %): 399 ( $[\text{M}+\text{H}]^+$ , 35), 119 (10), 102 (100); HRMS (DART)  $m/z$   $[\text{M}+\text{H}]^+$  Calcd for  $\text{C}_{27}\text{H}_{43}\text{O}_2$  399.3263; Found 399.3262.

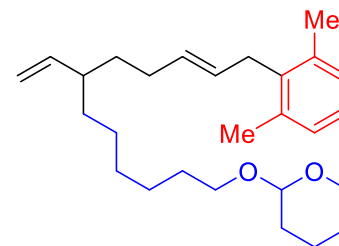



**(E)-12-tert-Butyldimethylsiloxy-1-(2-methylphenyl)-6-vinyldodec-2-ene (3cj):**<sup>S1</sup>

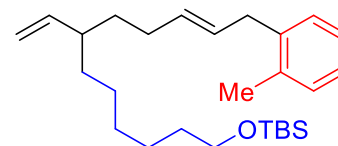

Following the general procedure, reaction was conducted using 1-tert-butyl dimethylsiloxy-6-fluorohexane (116.4 mg, 0.50 mmol) and 2-methylphenylmagnesium bromide (in THF, 0.82 M, 0.91 mL, 0.75 mmol). Purification by GPC gave the desired product as a colorless oil (123.8 mg, 60%): <sup>1</sup>H NMR (400 MHz, CDCl<sub>3</sub>): δ 7.13 (br s, 4H), 5.55–5.36 (m, 3H), 4.96–4.88 (m, 2H), 3.59 (t, *J* = 6.8 Hz, 2H), 3.30 (d, *J* = 6.0 Hz, 2H), 2.28 (s, 3H), 2.04–1.89 (m, 3H), 1.55–1.17 (m, 12H), 0.89 (s, 9H), 0.04 (s, 6H); <sup>13</sup>C NMR (100 MHz, CDCl<sub>3</sub>): δ 143.2, 139.1, 136.2, 131.8, 130.0, 128.9, 127.8, 126.0, 125.9, 114.3, 63.3, 43.6, 36.6, 34.9, 34.7, 32.9, 30.2, 29.5, 27.1, 26.0, 25.8, 19.4, 18.4, –5.3; MS (DART) *m/z* (relative intensity, %): 415 ([M+H]<sup>+</sup>, 100), 283 (58), 195 (25), 131 (10), 102 (13); HRMS (DART) *m/z* [M+H]<sup>+</sup> Calcd for C<sub>27</sub>H<sub>47</sub>OSi 415.3396; Found 415.3381.

**(E)-12-tert-Butyldimethylsiloxy-1-(2-ethylphenyl)-6-vinyldodec-2-ene (3ck):**<sup>S1</sup>

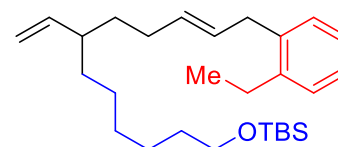

Following the general procedure, reaction was conducted using 1-tert-butyl dimethylsiloxy-6-fluorohexane (112.1 mg, 0.48 mmol) and 2-ethylphenylmagnesium bromide (in THF, 1.03 M, 0.73 mL, 0.75 mmol). Purification by GPC gave the desired product as a colorless oil (192.7 mg, 94%): <sup>1</sup>H NMR (400 MHz, CDCl<sub>3</sub>): δ 7.13–7.09 (m, 4H), 5.49–5.38 (m, 3H), 4.92–4.84 (m, 2H), 3.54 (t, *J* = 6.4 Hz, 2H), 3.29 (d, *J* = 6.0 Hz, 2H), 2.60 (q, *J* = 7.6 Hz, 2H), 2.04–1.83 (m, 3H), 1.55–1.17 (m, 12H), 1.16 (t, *J* = 7.6 Hz, 3H), 0.85 (s, 9H), 0.04 (s, 6H); <sup>13</sup>C NMR (100 MHz, CDCl<sub>3</sub>): δ 143.2, 142.0, 138.4, 131.7, 129.3, 128.6, 128.3, 126.2, 125.8, 114.3, 63.3, 43.6, 35.8, 34.9, 34.7, 32.8, 30.2, 29.5, 27.1, 26.0, 25.7, 25.5, 18.4, 15.1, –5.3; MS (DART) *m/z* (relative intensity, %): 429 ([M+H]<sup>+</sup>, 25), 371 (15), 327 (44), 283 (42), 239 (95), 195 (100); HRMS (DART) *m/z* [M+H]<sup>+</sup> Calcd for C<sub>28</sub>H<sub>49</sub>OSi 429.3553; Found 429.3581.

**(E)-12-tert-Butyldimethylsiloxy-1-(2,6-dimethylphenyl)-6-vinyldodec-2-ene (3cm):**<sup>S1</sup>

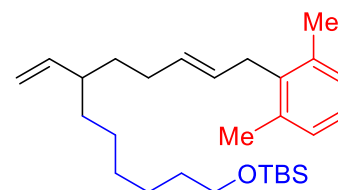

Following the general procedure, reaction was conducted using 1-tert-butyl dimethylsiloxy-6-fluorohexane (114.4 mg, 0.49 mmol) and 2,6-dimethylphenylmagnesium bromide (in THF, 0.83 M, 0.90 mL, 0.75 mmol). Purification by GPC gave the desired product as a colorless oil (175.5 mg, 84%): <sup>1</sup>H NMR (400 MHz, CDCl<sub>3</sub>): δ 7.00 (br s, 3H), 5.54–5.40 (m, 2H), 5.33–5.25 (m, 1H), 4.94–4.85 (m, 2H), 3.58 (t, *J* = 6.8 Hz, 2H), 3.32 (d, *J* = 5.6 Hz, 2H), 2.29 (s, 6H), 2.03–1.84 (m, 3H), 1.49 (quin, *J* = 6.8 Hz, 2H), 1.40–1.18 (m, 10H), 0.89 (s, 9H), 0.04 (s, 6H); <sup>13</sup>C NMR (100 MHz, CDCl<sub>3</sub>): δ 143.2, 137.1, 136.5, 130.9, 127.9, 126.4, 125.8, 114.2, 63.3, 43.5, 34.8, 34.7, 32.8, 32.6, 30.1, 29.5, 27.1, 26.0, 25.7, 19.9, 18.4, –5.3; MS (DART) *m/z* (relative

intensity, %): 429 ([M+H]<sup>+</sup>, 100), 347 (13), 327 (12), 297 (24), 283 (19), 239 (42), 195 (63), 133 (18), 119 (52); HRMS (DART) *m/z* [M+H]<sup>+</sup> Calcd for C<sub>28</sub>H<sub>49</sub>OSi 429.3553; Found 429.3540.

**(E)-17-(2,6-Dimethylphenyl)-12-vinylheptadec-1,15-diene (3jm):**<sup>S1</sup>

Following the general procedure, reaction was conducted using 11-fluoro-1-undecene (85.7 mg, 0.50 mmol) and 2,6-dimethylphenylmagnesium bromide (in THF, 0.83 M, 0.9 mL, 0.75 mmol). Purification by GPC gave the desired product as a colorless oil

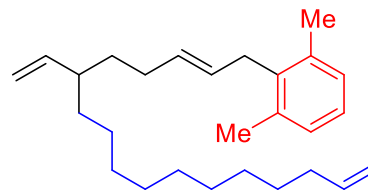

(166.3 mg, 91%): <sup>1</sup>H NMR (400 MHz, CDCl<sub>3</sub>): δ 7.00 (br s, 3H), 5.86–5.76 (m, 1H), 5.51–5.40 (m, 2H), 5.30–5.23 (m, 1H), 5.01–4.85 (m, 4H), 3.31 (d, *J* = 5.2 Hz, 2H), 2.29 (s, 6H), 2.03 (q, *J* = 6.8 Hz, 2H), 2.04–1.85 (m, 3H), 1.40–1.15 (m, 18H); <sup>13</sup>C NMR (100 MHz, CDCl<sub>3</sub>): δ 143.2, 139.2, 137.1, 136.5, 130.9, 127.9, 126.4, 125.8, 114.15, 114.08, 43.6, 34.9, 34.7, 33.8, 32.6, 30.1, 29.7, 29.6, 29.5, 29.1, 28.9, 27.1, 19.9; MS (DART) *m/z* (relative intensity, %): 367 ([M+H]<sup>+</sup>, 58), 283 (25), 239 (100), 195 (77); HRMS (DART) *m/z* [M+H]<sup>+</sup> Calcd for C<sub>27</sub>H<sub>43</sub> 367.3365; Found 367.3366.

**(E)-2-(9-(2,6-Dimethylphenyl)-4-vinyl-7-nonen-1-yl)thiophene (3dm):**<sup>S1</sup>

Following the general procedure, reaction was conducted using 2-(3-fluoropropyl)thiophene (84.6 mg, 0.59 mmol) and 2,6-dimethylphenylmagnesium bromide (in THF, 0.83 M, 1.0 mL, 0.83 mmol). Purification by GPC gave the desired product as a pale yellow oil

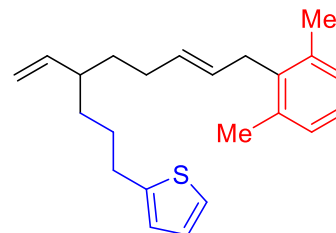

(185.2 mg, 93%): <sup>1</sup>H NMR (400 MHz, CDCl<sub>3</sub>): δ 7.08 (dd, *J* = 4.8, 1.2 Hz, 1H), 7.00 (br s, 3H), 6.89 (dd, *J* = 4.8, 3.2 Hz, 1H), 6.74 (dd, *J* = 3.2, 1.2 Hz, 1H), 5.51–5.40 (m, 2H), 5.29–5.22 (m, 1H), 4.96–4.87 (m, 2H), 3.31 (d, *J* = 5.6 Hz, 2H), 2.77 (q, *J* = 6.4 Hz, 2H), 2.28 (s, 6H), 2.02–1.83 (m, 3H), 1.72–1.52 (m, 2H), 1.42–1.19 (m, 4H); <sup>13</sup>C NMR (100 MHz, CDCl<sub>3</sub>): δ 145.6, 142.7, 137.0, 136.4, 130.7, 127.9, 126.6, 125.8, 123.9, 122.7, 114.6, 43.4, 34.7, 34.2, 32.6, 30.1, 29.9, 29.3, 19.9; MS (DART) *m/z* (relative intensity, %): 339 ([M+H]<sup>+</sup>, 100), 285 (12), 251 (15), 233 (18), 133 (14), 119 (58); HRMS (DART) *m/z* [M+H]<sup>+</sup> Calcd for C<sub>23</sub>H<sub>31</sub>S 339.2147; Found 339.2133.

**(E)-4-(8-(2,6-Dimethylphenyl)-3-vinyl-6-octen-1-yl)-1-tosylpiperidine (3gm):**<sup>S1</sup>

Following the general procedure, reaction was conducted using 4-(2-fluoroethyl)-1-tosylpiperidine (142.3 mg, 0.50 mmol) and 2,6-dimethylphenylmagnesium bromide (in THF, 0.83 M, 0.90 mL, 0.75 mmol). Purification by GPC gave the desired product as a colorless oil

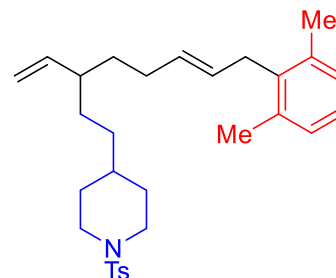

(225.4 mg, 94%): <sup>1</sup>H NMR (400 MHz, CDCl<sub>3</sub>): δ 7.63 (d, *J* = 8.4 Hz, 2H), 7.31 (d, *J* = 8.4 Hz, 2H), 6.99 (br s, 3H), 5.47–5.35 (m, 2H), 5.28–5.20 (m, 1H), 4.94–4.82 (m, 2H), 3.74 (d, *J* = 11.6 Hz, 2H), 3.29 (d,

$J = 6.0$  Hz, 2H), 2.42 (s, 3H), 2.27 (s, 6H), 2.17 (tt,  $J = 12.0, 1.6$  Hz, 2H), 2.01-1.78 (m, 3H), 1.66 (d,  $J = 12.8$  Hz, 2H), 1.37-1.01 (m, 9H);  $^{13}\text{C}$  NMR (100 MHz,  $\text{CDCl}_3$ ):  $\delta$  143.3, 142.7, 137.0, 136.4, 133.1, 130.6, 129.5, 127.9, 127.7, 126.6, 125.8, 114.5, 46.5, 43.5, 35.1, 34.6, 33.4, 32.5, 31.7, 31.6, 31.3, 30.0, 21.5, 19.8; MS (DART)  $m/z$  (relative intensity, %): 480 ( $[\text{M}+\text{H}]^+$ , 100), 415 (17), 339 (90), 324 (38), 283 (22), 245 (15), 119 (39); HRMS (DART)  $m/z$   $[\text{M}+\text{H}]^+$  Calcd for  $\text{C}_{30}\text{H}_{42}\text{NO}_2\text{S}$  480.2936; Found 480.2935.

**(E)-1-tert-Butoxycarbonyl-4-(8-(2,6-dimethylphenyl)-3-vinyl-6-octen-1-yl)piperidine (3km):<sup>S1</sup>**

Following the general procedure, reaction was conducted using 1-tert-butoxycarbonyl-4-(2-fluoroethyl)piperidine (115.0 mg, 0.50 mmol) and 2,6-dimethylphenylmagnesium bromide (in THF, 0.83 M, 0.90 mL, 0.75 mmol). Purification by GPC gave the desired product as a colorless oil

(187.6 mg, 89%);  $^1\text{H}$  NMR (400 MHz,  $\text{CDCl}_3$ ):  $\delta$  7.01 (br s, 3H), 5.51–5.40 (m, 2H), 5.30–5.22 (m, 1H), 4.96–4.86 (m, 2H), 4.04 (br, 2H), 3.32 (dd,  $J = 6.0, 1.2$  Hz, 2H), 2.64 (t,  $J = 12.0$  Hz, 2H), 2.29 (s, 6H), 2.03–1.84 (m, 3H), 1.62–1.57 (m, 2H), 1.45 (s, 9H), 1.37-1.01 (m, 9H);  $^{13}\text{C}$  NMR (100 MHz,  $\text{CDCl}_3$ ):  $\delta$  154.9, 143.0, 137.1, 136.5, 130.7, 127.9, 126.6, 125.8, 114.5, 79.1, 43.7, 36.1, 34.7, 33.9, 32.6, 31.8, 30.1, 28.5, 19.9; MS (ESI)  $m/z$  (relative intensity, %): 448 ( $[\text{M}+\text{Na}]^+$ , 100), 392 (30), 326 (12); HRMS (ESI)  $m/z$   $[\text{M}+\text{Na}]^+$  Calcd for  $\text{C}_{28}\text{H}_{43}\text{NO}_2\text{Na}$  448.3191; Found 448.3191.

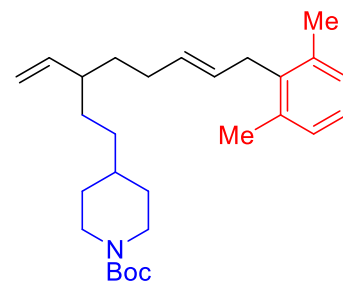

**(E)-1-(2,6-Dimethylphenyl)-9-phenoxy-6-vinylnon-2-ene (3/m):<sup>S1</sup>**

Following the general procedure, reaction was conducted using 3-fluoropropyl phenyl ether (83.3 mg, 0.54 mmol) and 2,6-dimethylphenylmagnesium bromide (in THF, 0.83 M, 1.0 mL, 0.83 mmol). Purification by GPC gave the desired product as a colorless oil (174.7 mg, 93%);

$^1\text{H}$  NMR (400 MHz,  $\text{CDCl}_3$ ):  $\delta$  7.25 (t,  $J = 8.0$  Hz, 2H), 7.00 (br s, 3H), 6.91 (t,  $J = 6.8$  Hz, 1H), 6.86 (dd,  $J = 8.8, 0.8$  Hz, 2H), 5.53–5.41 (m, 2H), 5.29–5.24 (m, 1H), 4.98–4.90 (m, 2H), 3.88 (t,  $J = 6.4$  Hz, 2H), 3.30 (d,  $J = 5.6$  Hz, 2H), 2.28 (s, 6H), 2.05–1.22 (m, 9H);  $^{13}\text{C}$  NMR (100 MHz,  $\text{CDCl}_3$ ):  $\delta$  159.0, 142.5, 137.0, 136.4, 130.6, 129.3, 127.9, 126.6, 125.8, 120.4, 114.9, 114.4, 67.7, 43.4, 34.7, 32.5, 31.1, 30.1, 26.9, 19.8; MS (DART)  $m/z$  (relative intensity, %): 349 ( $[\text{M}+\text{H}]^+$ , 13), 255 (30), 239 (12), 195 (20), 119 (18), 102 (100); HRMS (DART)  $m/z$   $[\text{M}+\text{H}]^+$  Calcd for  $\text{C}_{25}\text{H}_{33}\text{O}$  349.2531; Found 349.2558.

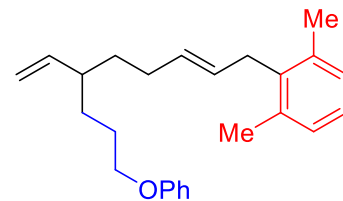

**(E)-1-(4-Chloro-2-methylphenyl)-9-phenoxy-6-vinylnon-2-ene (3/h):<sup>S1</sup>**

Following the general procedure, reaction was conducted using

3-fluoropropyl phenyl ether (72.7 mg, 0.47 mmol) and 4-chloro-2-methylphenylmagnesium bromide (in

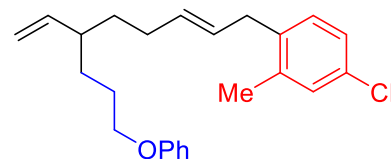

THF, 0.48 M, 1.5 mL, 0.72 mmol). Purification by GPC gave the desired product as a colorless oil (116.8 mg, 67%):  $^1\text{H}$  NMR (400 MHz,  $\text{CDCl}_3$ ):  $\delta$  7.27 (dd,  $J = 8.8, 7.2$  Hz, 2H), 7.11–7.08 (m, 2H), 7.03 (d,  $J = 7.2$  Hz, 1H), 6.92 (t,  $J = 7.2$  Hz, 1H), 6.88 (dd,  $J = 8.8, 0.8$  Hz, 2H), 5.56–5.45 (m, 2H), 5.41–5.34 (m, 1H), 5.02–4.93 (m, 2H), 3.92 (t,  $J = 6.4$  Hz, 2H), 3.24 (d,  $J = 6.0$  Hz, 2H), 2.24 (s, 3H), 2.12–1.25 (m, 9H);  $^{13}\text{C}$  NMR (100 MHz,  $\text{CDCl}_3$ ):  $\delta$  159.0, 142.5, 138.1, 137.5, 132.0, 131.4, 130.2, 129.8, 129.4, 127.5, 125.9, 120.5, 115.0, 114.4, 67.8, 43.4, 35.9, 34.7, 31.2, 30.1, 27.0, 19.2; MS (DART)  $m/z$  (relative intensity, %): 369 ( $[\text{M}+\text{H}]^+$ , 5), 342 (16), 239 (25), 195 (24); HRMS (DART)  $m/z$   $[\text{M}+\text{H}]^+$  Calcd for  $\text{C}_{24}\text{H}_{30}\text{ClO}$  369.1985; Found 369.2008.

**(E)-1-(2,6-Dimethylphenyl)-9-(4-fluorophenoxy)-6-vinylnon-2-ene (3em):<sup>S1</sup>**

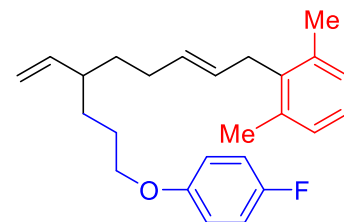

Following the general procedure, reaction was conducted using 4-fluorophenyl 3-fluoropropyl ether (90.0 mg, 0.52 mmol) and 2,6-dimethylphenylmagnesium bromide (in THF, 0.83 M, 0.90 mL, 0.75 mmol). Purification by GPC gave the desired product as a colorless oil (179.6 mg, 94%):  $^1\text{H}$  NMR (400 MHz,  $\text{CDCl}_3$ ):  $\delta$  7.00 (br s, 3H), 6.94 (t,  $J = 8.8$  Hz, 2H), 6.79 (dd,  $J = 8.8, 4.0$  Hz, 2H), 5.54–5.40 (m, 2H), 5.30–5.21 (m, 1H), 4.99–4.90 (m, 2H), 3.86 (t,  $J = 6.8$  Hz, 2H), 3.31 (d,  $J = 5.2$  Hz, 2H), 2.28 (s, 6H), 2.05–1.22 (m, 9H);  $^{13}\text{C}$  NMR (100 MHz,  $\text{CDCl}_3$ ):  $\delta$  158.3, 155.9, 155.2, 142.5, 137.0, 136.5, 130.6, 127.9, 126.7, 125.8, 115.8, 115.6, 115.4, 115.3, 114.9, 68.6, 43.4, 34.8, 32.6, 31.1, 30.1, 26.9, 19.8;  $^{19}\text{F}$  NMR (376 MHz,  $\text{CDCl}_3$ ):  $\delta$  -124.3 (s); MS (DART)  $m/z$  (relative intensity, %): 367 ( $[\text{M}+\text{H}]^+$ , 4), 283 (19), 251 (32), 239 (100), 195 (65); HRMS (DART)  $m/z$   $[\text{M}+\text{H}]^+$  Calcd for  $\text{C}_{25}\text{H}_{32}\text{FO}$  367.2437; Found 367.2466.

**(E)-1-(4-Fluoro-2-methylphenyl)-9-(4-fluorophenoxy)-6-vinylnon-2-ene (3eo):<sup>S1</sup>**

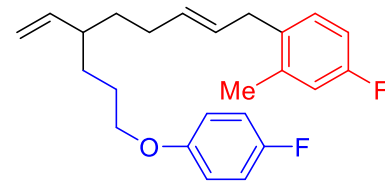

Following the general procedure, reaction was conducted using 4-fluorophenyl 3-fluoropropyl ether (82.4 mg, 0.48 mmol) and 4-fluoro-2-methylphenylmagnesium bromide (in THF, 0.48 M, 1.56 mL, 0.75 mmol). Purification by GPC gave the desired product as a colorless oil (124.7 mg, 70%):  $^1\text{H}$  NMR (400 MHz,  $\text{CDCl}_3$ ):  $\delta$  7.05 (dd,  $J = 8.0, 6.0$  Hz, 1H), 6.94 (t,  $J = 8.8$  Hz, 2H), 6.84–6.78 (m, 4H), 5.55–5.46 (m, 2H), 5.40–5.35 (m, 1H), 5.02–4.93 (m, 2H), 3.87 (t,  $J = 6.8$  Hz, 2H), 3.24 (d,  $J = 6.4$  Hz, 2H), 2.25 (s, 3H), 2.10–1.90 (m, 3H), 1.84–1.27 (m, 6H);  $^{13}\text{C}$  NMR (100 MHz,  $\text{CDCl}_3$ ):  $\delta$  162.4, 160.0, 158.2, 155.9, 155.2, 155.1, 142.5, 138.35, 138.27, 134.6, 134.5, 131.6, 130.15, 130.07, 127.9, 116.7, 116.5, 115.8, 115.6, 115.33, 115.25, 115.0, 112.4, 112.2, 68.5, 43.4, 35.7, 34.7, 31.1, 30.1, 27.0, 19.4;  $^{19}\text{F}$  NMR (376 MHz,  $\text{CDCl}_3$ ):  $\delta$  -118.0 (s, 1F), -124.3 (s, 1F); MS (DART)  $m/z$  (relative intensity, %): 371 ( $[\text{M}+\text{H}]^+$ , 15), 283 (15), 259 (54), 239 (100), 195 (73), 102 (94); HRMS (DART)  $m/z$   $[\text{M}+\text{H}]^+$  Calcd for  $\text{C}_{24}\text{H}_{29}\text{F}_2\text{O}$  371.2187; Found

371.2205.

**(E)-9-(4-Chlorophenoxy)-1-(2,6-dimethylphenyl)-6-vinylnon-2-ene (3fm):**<sup>S1</sup>

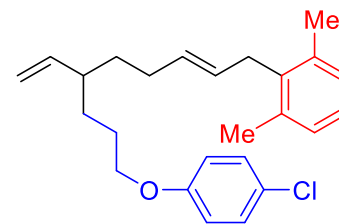

Following the general procedure, reaction was conducted using 4-chlorophenyl 3-fluoropropyl ether (95.3 mg, 0.51 mmol) and 2,6-dimethylphenylmagnesium bromide (in THF, 0.83 M, 0.90 mL, 0.75 mmol). Purification by GPC gave the desired product as a colorless oil (188.1 mg, 97%): <sup>1</sup>H NMR (400 MHz, CDCl<sub>3</sub>): δ 7.21 (d, *J* = 8.8 Hz, 2H), 7.00 (br s, 3H), 6.79 (d, *J* = 8.8 Hz, 2H), 5.53–5.41 (m, 2H), 5.30–5.23 (m, 1H), 4.99–4.90 (m, 2H), 3.86 (t, *J* = 6.4 Hz, 2H), 3.31 (d, *J* = 5.2 Hz, 2H), 2.28 (s, 6H), 2.05–1.22 (m, 9H); <sup>13</sup>C NMR (100 MHz, CDCl<sub>3</sub>): δ 157.7, 142.5, 137.0, 136.5, 130.6, 129.2, 127.9, 126.7, 125.8, 125.3, 115.3, 114.9, 68.2, 43.4, 34.8, 32.6, 31.1, 30.1, 26.9, 19.9; MS (DART) *m/z* (relative intensity, %): 383 ([M+H]<sup>+</sup>, 2), 342 (16), 283 (32), 251 (35), 239 (98), 195 (100); HRMS (DART) *m/z* [M+H]<sup>+</sup> Calcd for C<sub>25</sub>H<sub>32</sub>ClO 383.2142; Found 383.2168.

**(E)-9-(4-Chlorophenoxy)-1-(2-methyl-1-naphthyl)-6-vinylnon-2-ene (3fs):**<sup>S1</sup>

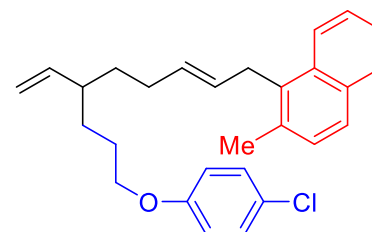

Following the general procedure, reaction was conducted using 4-chlorophenyl 3-fluoropropyl ether (100.2 mg, 0.53 mmol) and 2-methyl-1-naphthylmagnesium bromide (in THF, 0.15 M, 5.0 mL, 0.75 mmol) for 20 h. Purification by GPC gave the desired product as a colorless oil (158.7 mg, 71%): <sup>1</sup>H NMR (400 MHz, CDCl<sub>3</sub>): δ 8.00 (d, *J* = 8.8 Hz, 1H), 7.79 (d, *J* = 7.2 Hz, 1H), 7.64 (d, *J* = 8.0 Hz, 1H), 7.46 (td, *J* = 8.4, 1.6 Hz, 1H), 7.39 (t, *J* = 8.0 Hz, 1H), 7.30 (d, *J* = 8.8 Hz, 1H), 7.20 (d, *J* = 8.4 Hz, 2H), 6.77 (d, *J* = 8.4 Hz, 2H), 5.59 (dt, *J* = 14.8, 5.6 Hz, 1H), 5.49–5.40 (m, 1H), 5.33 (dt, *J* = 15.6, 6.4 Hz, 1H), 4.96–4.85 (m, 2H), 3.83 (t, *J* = 6.4 Hz, 2H), 3.76 (d, *J* = 4.8 Hz, 2H), 2.47 (s, 3H), 2.05–1.20 (m, 9H); <sup>13</sup>C NMR (100 MHz, CDCl<sub>3</sub>): δ 157.6, 142.5, 133.44, 133.42, 132.5, 132.3, 131.1, 129.21, 129.17, 128.4, 127.4, 126.2, 125.8, 125.2, 124.4, 123.9, 115.7, 114.9, 68.2, 43.3, 34.6, 31.6, 31.0, 30.1, 26.8, 20.1; MS (DART) *m/z* (relative intensity, %): 419 ([M+H]<sup>+</sup>, 40), 386 (15), 342 (16), 283 (24), 239 (100), 195 (95), 177 (24); HRMS (DART) *m/z* [M+H]<sup>+</sup> Calcd for C<sub>28</sub>H<sub>32</sub>ClO 419.2142; Found 419.2156.

**(E)-12-Chloro-1-(2,6-dimethylphenyl)-6-vinyldodec-2-ene (3mm):**<sup>S1</sup>

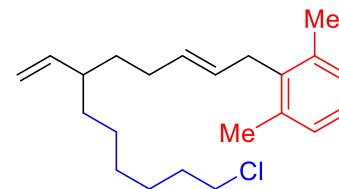

Following the general procedure, reaction was conducted using 1-chloro-6-fluorohexane (69.6 mg, 0.50 mmol) and 2,6-dimethylphenylmagnesium bromide (in THF, 0.83 M, 0.9 mL, 0.75 mmol). Purification by GPC gave the desired product as a pale yellow oil (135.4 mg, 81%): <sup>1</sup>H NMR (400 MHz, CDCl<sub>3</sub>): δ 7.02 (br s, 3H), 5.50–5.42 (m, 2H), 5.30–5.23 (m, 1H), 4.95–4.86 (m, 2H), 3.52 (t,

$J = 7.2$  Hz, 2H), 3.31 (d,  $J = 5.6$  Hz, 2H), 2.29 (s, 6H), 2.03–1.85 (m, 3H), 1.74 (quin,  $J = 7.6$  Hz, 2H), 1.44–1.17 (m, 10H);  $^{13}\text{C}$  NMR (100 MHz,  $\text{CDCl}_3$ ):  $\delta$  143.1, 137.1, 136.5, 130.8, 127.9, 126.5, 125.8, 114.3, 45.2, 43.5, 34.7, 32.6, 30.1, 28.9, 26.9, 26.8, 19.9; MS (DART)  $m/z$  (relative intensity, %): 333 ( $[\text{M}+\text{H}]^+$ , 12), 283 (14), 239 (80), 195 (100); HRMS (DART)  $m/z$   $[\text{M}+\text{H}]^+$  Calcd for  $\text{C}_{22}\text{H}_{34}\text{Cl}$  333.2349; Found 333.2344.

**(*E*)-12-Chloro-1-(4-fluoro-2-methylphenyl)-6-vinyldodec-2-ene**  
**(3mo):<sup>S1</sup>**

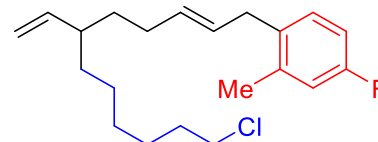

Following the general procedure, reaction was conducted using 1-chloro-6-fluorohexane (76.0 mg, 0.55 mmol) and 4-fluoro-2-methylphenylmagnesium bromide (in THF, 0.48 M, 1.56 mL, 0.75 mmol). Purification by GPC gave the desired product as a pale yellow oil (129.7 mg, 70%):  $^1\text{H}$  NMR (400 MHz,  $\text{CDCl}_3$ ):  $\delta$  7.05 (dd,  $J = 8.0, 6.0$  Hz, 1H), 6.86–6.78 (m, 2H), 5.53–5.43 (m, 2H), 5.40–5.33 (m, 1H), 4.97–4.88 (m, 2H), 3.52 (t,  $J = 6.8$  Hz, 2H), 3.24 (d,  $J = 6.0$  Hz, 2H), 2.26 (s, 3H), 2.10–1.89 (m, 3H), 1.74 (quin,  $J = 6.8$  Hz, 2H), 1.44–1.17 (m, 10H);  $^{13}\text{C}$  NMR (100 MHz,  $\text{CDCl}_3$ ):  $\delta$  162.4, 160.0, 143.0, 138.35, 138.27, 134.61, 134.58, 131.8, 130.2, 130.1, 127.7, 116.7, 116.5, 114.4, 112.4, 112.2, 45.1, 43.6, 35.8, 34.8, 34.7, 32.6, 30.1, 28.9, 26.9, 26.8, 19.45, 19.43;  $^{19}\text{F}$  NMR (376 MHz,  $\text{CDCl}_3$ ):  $\delta$  –118.1 (s); MS (DART)  $m/z$  (relative intensity, %): 337 ( $[\text{M}+\text{H}]^+$ , 10), 283 (18), 256 (13), 239 (100), 195 (95), 151 (12), 102 (43); HRMS (DART)  $m/z$   $[\text{M}+\text{H}]^+$  Calcd for  $\text{C}_{21}\text{H}_{31}\text{ClF}$  337.2098; Found 337.2112.

**The four-component coupling reaction of *n*-OctF (1a), *o*-TolMgBr (2j), and isoprene**

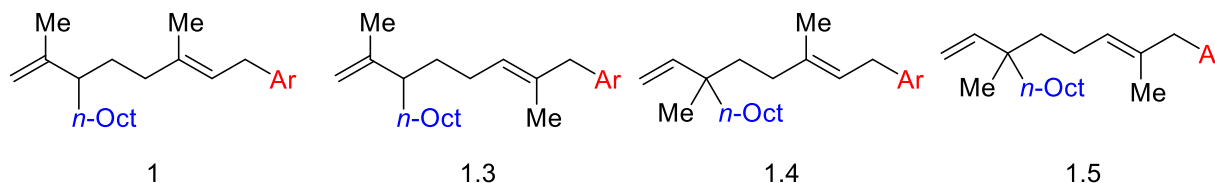

An oven-dried test tube was charged with  $\text{NiBr}_2(\text{dme})$  (7.4 mg, 4 mol%) and a stirring bar and closed with a septum cap. The test tube was evacuated and back-filled with nitrogen for three times. 1-Fluorooctane (75.3 mg, 0.57 mmol) and THF (0.46 mL) were added via syringe at ambient temperature. 2-Methylphenylmagnesium bromide (in THF, 0.82 M, 1.04 mL, 0.86 mmol) and isoprene (170  $\mu\text{L}$ , 1.7 mmol) were added at  $-78$   $^\circ\text{C}$  and then stirred at  $40$   $^\circ\text{C}$ . After 10 h, aqueous work-up was carried out according to the general procedure. Purification by GPC gave the desired product **3aj'** as an inseparable mixture of four isomers (146.5 mg, 76%). Ratio of isomers was determined to be 1:1.3:1.4:1.5 by GC and NMR analyses:  $^1\text{H}$  NMR (400 MHz,  $\text{CDCl}_3$ ):  $\delta$  7.13–7.09 (m, 4H), 5.67 (dd,  $J = 17.6, 10.8$  Hz, 0.57H), 5.22 (t,  $J = 7.2$  Hz, 0.54H), 5.05–4.95 (m, 0.46H), 4.96 (d,  $J = 10.8$  Hz, 0.57H), 4.87 (d,  $J = 17.6$  Hz, 0.57H), 4.71 (s, 0.43H), 4.63 (s, 0.43H), 3.29 (d,  $J = 6.8$  Hz, 1.10H), 3.26 (s, 0.90H), 2.28 (s, 1.6H), 2.26 (s, 0.5H), 2.25 (s, 0.9H), 2.02–1.96 (m, 2.5H), 1.70 (s, 1.6H), 1.57 (s, 2.7H),

1.45-1.15 (m, 15H), 0.94 (s, 1.6H), 0.88 (t,  $J = 6.8$  Hz, 3H);  $^{13}\text{C}$  NMR (100 MHz,  $\text{CDCl}_3$ ):  $\delta$  147.69, 147.66, 147.5, 140.0, 138.4, 138.3, 136.95, 136.88, 136.85, 136.4, 136.21, 136.17, 133.1, 132.8, 130.02, 129.98, 129.68, 129.66, 128.56, 128.55, 126.6, 126.4, 126.0, 125.91, 125.87, 125.7, 122.1, 121.7, 111.42, 111.38, 111.36, 111.33, 47.03, 46.96, 43.22, 43.20, 40.84, 40.81, 39.5, 39.4, 39.3, 37.6, 34.3, 33.5, 33.4, 32.12, 32.08, 31.9, 31.8, 30.5, 29.7, 29.63, 29.60, 29.4, 27.5, 26.0, 24.00, 23.98, 22.8, 22.7, 22.48, 22.45, 19.5, 19.4, 17.9, 17.8, 16.41, 16.36, 16.2, 14.1; MS (EI)  $m/z$  (relative intensity, %): 340 ( $[\text{M}]^+$ , 10), 235 (10), 207 (19), 157 (50), 105 (100); HRMS (EI)  $m/z$   $[\text{M}]^+$  Calcd for  $\text{C}_{25}\text{H}_{40}$  340.3130; Found 340.3123.

**The reaction of 1,1-diphenyl-6-fluorohex-1-ene (1n) with 4-fluorophenylmagnesium bromide (2a)**

The representative general procedure was followed in a 0.6 mmol scale using 1,1-diphenyl-6-fluorohex-1-ene (152.5 mg, 0.60 mmol), 4-fluorophenylmagnesium bromide (in THF, 0.80 M, 1.5 mL, 1.2 mmol) and 1,3-butadiene (40 mL as gas, 1.8 mmol) in THF (total 1.8 mL) at 30 °C for 42 h. Purification by GPC gave the desired product **3na** as a colorless oil (98.2 mg, 37%) accompanied by cross-coupling product **4na** as a colorless oil (74.9 mg, 38%).

**(E)-1,1-Diphenyl-12-(4-fluorophenyl)-7-vinyldodec-1,10-diene (3na):**

$^1\text{H}$  NMR (400 MHz,  $\text{CDCl}_3$ ):  $\delta$  7.35 (t,  $J = 7.2$  Hz, 2H), 7.30–7.19 (m, 6H), 7.17–7.15 (m, 2H), 7.12–7.09 (m, 2H), 6.95 (t,  $J = 8.8$  Hz, 2H), 6.06 (t,  $J = 7.6$  Hz, 1H), 5.49–5.47 (m, 3H), 4.96–4.88 (m, 2H), 3.27 (d,  $J = 5.2$  Hz, 2H), 2.09 (q,  $J = 7.6$  Hz, 2H), 2.03–1.88 (m, 3H), 1.45–1.16 (m, 8H);  $^{13}\text{C}$  NMR (100 MHz,  $\text{CDCl}_3$ ):  $\delta$  162.5, 160.1, 143.0, 142.9, 141.5, 140.3, 136.64, 136.61, 132.1, 130.2, 130.0, 129.8, 129.7, 128.7, 128.11, 128.06, 127.2, 126.81, 126.75, 115.1, 114.9, 114.4, 43.6, 38.2, 34.72, 34.69, 30.1, 30.0, 29.7, 26.8;  $^{19}\text{F}$  NMR (376 MHz,  $\text{CDCl}_3$ ):  $\delta$  -117.6 (s); MS (EI)  $m/z$  (relative intensity, %): 438 ( $[\text{M}]^+$ , 33), 329 (11), 316 (12), 233 (12), 219 (14), 206 (31), 205 (49), 194 (18), 193 (100); HRMS (EI)  $m/z$   $[\text{M}]^+$  Calcd for  $\text{C}_{32}\text{H}_{35}\text{F}$  438.2723; Found 438.2720.

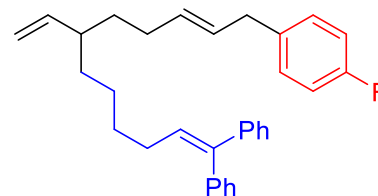

**1,1-Diphenyl-6-(4-fluorophenyl)hex-1-ene (4na):**

$^1\text{H}$  NMR (400 MHz,  $\text{CDCl}_3$ ):  $\delta$  7.38–7.34 (m, 2H), 7.31–7.19 (m, 6H), 7.17–7.14 (m, 2H), 7.08–7.04 (m, 2H), 6.93 (t,  $J = 8.8$  Hz, 2H), 6.05 (t,  $J = 7.6$  Hz, 1H, C=CH), 2.51 (t,  $J = 7.6$  Hz, 2H), 2.13 (q,  $J = 7.6$  Hz, 2H), 1.59 (quin,  $J = 7.6$  Hz, 2H), 1.45 (quin,  $J = 7.6$  Hz, 2H);  $^{13}\text{C}$  NMR (100 MHz,  $\text{CDCl}_3$ ):  $\delta$  162.3, 142.7, 141.7, 140.2, 138.0, 129.9, 129.8, 129.7, 129.6, 128.1, 128.0, 127.2, 126.85, 126.79, 115.0, 114.8, 34.8, 31.0, 29.5, 29.3;  $^{19}\text{F}$  NMR (376 MHz,  $\text{CDCl}_3$ ):  $\delta$  -117.9 (s); MS (EI)  $m/z$  (relative intensity, %): 330 ( $[\text{M}]^+$ , 66), 194 (17), 193 (100); HRMS (EI)  $m/z$   $[\text{M}]^+$  Calcd for  $\text{C}_{24}\text{H}_{23}\text{F}$  330.1784; Found 330.1782.

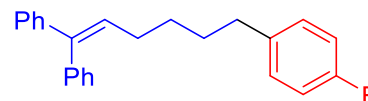

**(E)-12-(2,6-Dimethylphenyl)-1,1-diphenyl-7-vinyldodec-1,10-diene (3nm):<sup>S1</sup>**

Following the general procedure, reaction was conducted using 1,1-diphenyl-6-fluoro-1-hexene (141.7 mg, 0.56 mmol) and 2,6-dimethylphenylmagnesium bromide (in THF, 0.83 M, 1.0 mL, 0.83 mmol). Purification by GPC gave the desired product as a pale yellow oil (233.0 mg, 93%):  $^1\text{H}$  NMR (400 MHz,  $\text{CDCl}_3$ ):  $\delta$  7.37–7.14 (m, 10H), 6.99 (br s, 3H), 6.05 (t,  $J = 7.6$  Hz, 1H), 5.48–5.39 (m, 2H), 5.30–5.21 (m, 1H), 4.93–4.84 (m, 2H), 3.31 (d,  $J = 4.8$  Hz, 2H), 2.28 (s, 6H), 2.08 (q,  $J = 7.6$  Hz, 2H), 2.00–1.82 (m, 3H), 1.45–1.10 (m, 8H);  $^{13}\text{C}$  NMR (100 MHz,  $\text{CDCl}_3$ ):  $\delta$  143.1, 142.9, 141.4, 140.3, 137.1, 136.5, 130.8, 130.2, 129.9, 128.1, 128.0, 127.9, 127.2, 126.8, 126.7, 126.5, 125.8, 114.3, 43.5, 34.7, 34.6, 32.6, 30.1, 29.9, 29.7, 26.7, 19.9; MS (DART)  $m/z$  (relative intensity, %): 449 ( $[\text{M}+\text{H}]^+$ , 86), 419 (20), 371 (42); HRMS (DART)  $m/z$   $[\text{M}+\text{H}]^+$  Calcd for  $\text{C}_{34}\text{H}_{41}$  449.3208; Found 449.3226.

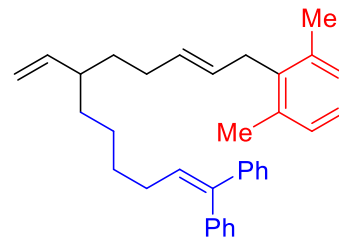



## Cartesian coordinates (x, y, z) of optimized structures

Figures 10 and 11

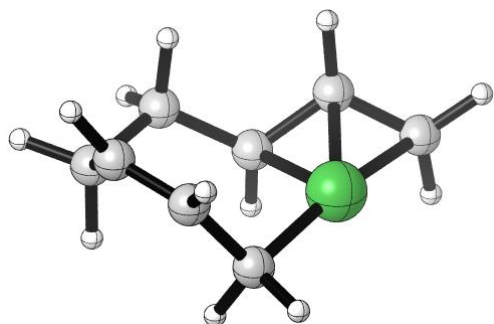

**Ni complex**

|    |             |             |             |
|----|-------------|-------------|-------------|
| Ni | 7.82182800  | 11.51124300 | -0.19678300 |
| C  | 6.30567000  | 10.34705100 | 0.36735000  |
| C  | 7.32104200  | 10.43260200 | 1.32106500  |
| C  | 7.80983700  | 11.73490100 | 1.68223100  |
| C  | 9.03851000  | 11.85271000 | 2.53109300  |
| C  | 10.04243300 | 12.95690600 | 2.13191800  |
| C  | 10.86499700 | 12.56338300 | 0.94827000  |
| C  | 10.37210900 | 12.52595200 | -0.30020000 |
| C  | 9.00151700  | 12.91344500 | -0.67033700 |
| H  | 5.47438800  | 11.05762200 | 0.37488200  |
| H  | 6.06613200  | 9.37368300  | -0.05746300 |
| H  | 7.94208600  | 9.56022600  | 1.54122000  |
| H  | 7.06370300  | 12.51912000 | 1.86831900  |
| H  | 9.57294200  | 10.89112600 | 2.54054200  |
| H  | 8.71041500  | 12.03681300 | 3.56520400  |
| H  | 9.48265400  | 13.88680900 | 1.94470700  |
| H  | 10.68977400 | 13.15934100 | 2.99378200  |
| H  | 11.88300400 | 12.22290300 | 1.13440600  |
| H  | 11.02156600 | 12.15018500 | -1.09435300 |
| H  | 8.90602500  | 13.05201900 | -1.76218700 |
| H  | 8.69076800  | 13.84856000 | -0.18386600 |

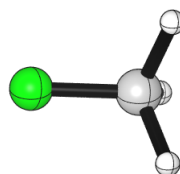

**MeF**

|   |             |             |             |
|---|-------------|-------------|-------------|
| C | -0.26568700 | 0.05489700  | 0.09251400  |
| H | -0.20497400 | 0.45747000  | -0.92470600 |
| H | -0.17096400 | -1.03643800 | 0.06874500  |
| H | 0.52412500  | 0.48777500  | 0.71603300  |
| F | -1.49078200 | 0.38613700  | 0.63198000  |

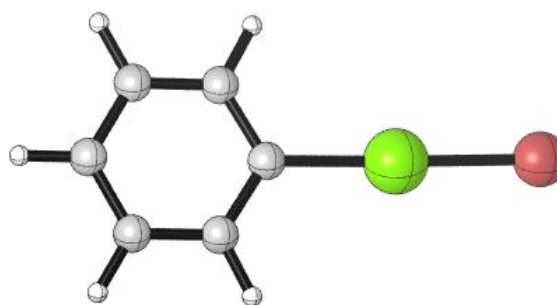

**PhMgBr**

|    |             |             |             |
|----|-------------|-------------|-------------|
| Mg | 1.51629300  | 0.16411400  | -0.26385300 |
| Br | 3.49858800  | 0.49411600  | 0.89375300  |
| C  | -0.22890600 | -0.11600600 | -1.32706900 |
| C  | -0.30236500 | 0.21133100  | -2.69254200 |
| C  | -1.39874400 | -0.63436700 | -0.74528600 |
| C  | -1.46708900 | 0.03520900  | -3.43445500 |
| H  | 0.56949600  | 0.61886600  | -3.20848900 |
| C  | -2.56959700 | -0.81561700 | -1.47601200 |
| H  | -1.41198900 | -0.91036400 | 0.31079000  |
| C  | -2.60545400 | -0.47999900 | -2.82507200 |
| H  | -1.48573900 | 0.30077500  | -4.48974400 |
| H  | -3.45628900 | -1.22040400 | -0.99165800 |
| H  | -3.51858300 | -0.62004100 | -3.39952100 |

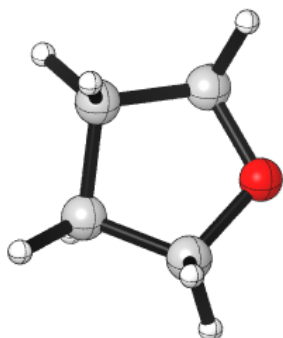

**THF**

|   |             |            |             |
|---|-------------|------------|-------------|
| O | 0.68414200  | 2.64743300 | 0.40283900  |
| C | 1.84408000  | 3.19378200 | 1.00814000  |
| C | 0.46138100  | 3.26319600 | -0.85584400 |
| C | 2.17056600  | 4.45933600 | 0.23124600  |
| H | 1.64066500  | 3.37456700 | 2.07119000  |
| H | 2.67622700  | 2.47156600 | 0.94427800  |
| C | 1.71680700  | 4.06427000 | -1.16896600 |
| H | 0.24526200  | 2.48879900 | -1.60313200 |
| H | -0.41984900 | 3.92390700 | -0.79440100 |
| H | 3.22604200  | 4.74160900 | 0.29300000  |
| H | 1.56957900  | 5.30063600 | 0.60066200  |
| H | 2.47186200  | 3.42409600 | -1.64394700 |
| H | 1.52816900  | 4.91443900 | -1.83165100 |

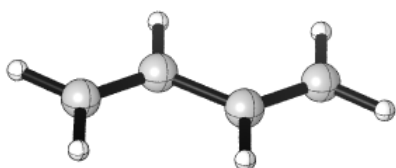

**1,3-butadiene**

|   |             |            |            |
|---|-------------|------------|------------|
| C | -1.14956300 | 1.40181200 | 0.00303800 |
| C | -1.98367000 | 1.21461800 | 1.02898800 |

|   |             |            |             |
|---|-------------|------------|-------------|
| H | -1.53044900 | 1.36468700 | -1.01984500 |
| H | -1.62743600 | 1.24665000 | 2.05748500  |
| H | -3.04273300 | 1.02435900 | 0.88276000  |
| C | 0.27177600  | 1.65907500 | 0.14967600  |
| C | 1.10556300  | 1.84591800 | -0.87649500 |
| H | 0.65285400  | 1.69612600 | 1.17247500  |
| H | 2.16474600  | 2.03605900 | -0.73095500 |
| H | 0.74881100  | 1.81368100 | -1.90482300 |

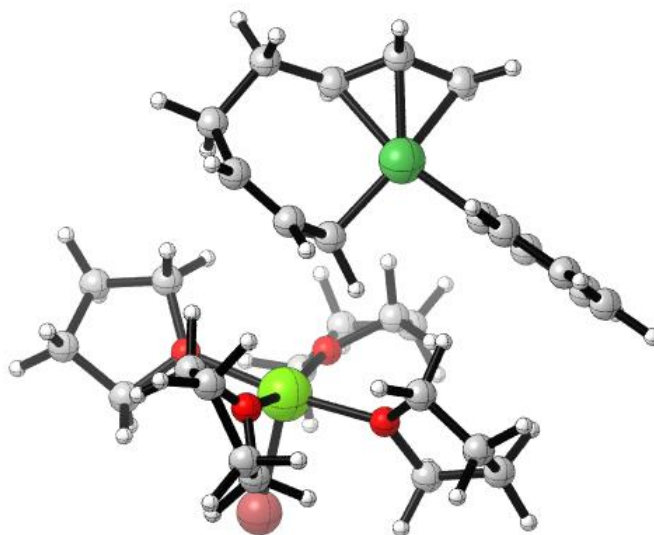

**INT1**

|    |             |             |             |
|----|-------------|-------------|-------------|
| Ni | 9.59696200  | 13.09589300 | -0.81780500 |
| C  | 7.71356900  | 13.60616500 | -0.66650700 |
| C  | 8.23706700  | 13.23686300 | 0.58760100  |
| C  | 9.42501100  | 13.81794000 | 1.07297500  |
| C  | 10.06712300 | 13.29747000 | 2.32244000  |
| C  | 11.59912400 | 13.14836900 | 2.23280500  |
| C  | 12.01094200 | 11.99502500 | 1.37304800  |
| C  | 11.93272200 | 11.99606400 | 0.02182100  |
| C  | 11.57156100 | 13.10282300 | -0.85567700 |
| C  | 9.33358300  | 12.52634500 | -2.60000900 |
| C  | 9.12502500  | 13.35220200 | -3.72047800 |

|    |             |             |             |   |             |             |             |
|----|-------------|-------------|-------------|---|-------------|-------------|-------------|
| C  | 8.93185400  | 12.85396000 | -5.00839200 | H | 10.52811900 | 17.13806300 | -3.60618100 |
| C  | 8.91429400  | 11.47913400 | -5.23438700 | O | 15.02604900 | 14.40992800 | -0.57419600 |
| C  | 9.08276500  | 10.62399600 | -4.14736300 | C | 16.44626800 | 14.57390500 | -0.34863200 |
| C  | 9.29092000  | 11.14263800 | -2.86988800 | C | 14.29168600 | 14.81066200 | 0.60402000  |
| H  | 7.71895500  | 14.65486900 | -0.98083600 | C | 16.57693200 | 14.74033800 | 1.14975500  |
| H  | 6.89797100  | 13.02191700 | -1.08625600 | H | 16.96188700 | 13.70243200 | -0.76625800 |
| H  | 7.91826200  | 12.28859200 | 1.03291200  | H | 16.78405000 | 15.46236800 | -0.89846700 |
| H  | 9.58812900  | 14.88941500 | 0.88935800  | C | 15.30679500 | 15.51351300 | 1.48009900  |
| H  | 9.63725300  | 12.31556300 | 2.57386700  | H | 13.45271800 | 15.44276800 | 0.28781300  |
| H  | 9.83812500  | 13.96262100 | 3.17052100  | H | 13.89311500 | 13.90416800 | 1.08048200  |
| H  | 11.99196900 | 14.10635800 | 1.85376600  | H | 17.49742800 | 15.25911200 | 1.43166600  |
| H  | 12.00920100 | 13.02966500 | 3.24566600  | H | 16.56518700 | 13.76199200 | 1.64923800  |
| H  | 12.20721700 | 11.04947000 | 1.88130700  | H | 15.41458600 | 16.56531800 | 1.18202900  |
| H  | 12.10919300 | 11.03625900 | -0.48206700 | H | 15.02990700 | 15.48440500 | 2.53761200  |
| H  | 11.93430700 | 12.95951400 | -1.88410800 | O | 14.96289800 | 11.77799900 | -1.81842000 |
| H  | 11.86829500 | 14.08874900 | -0.47122900 | C | 15.76157800 | 10.99303900 | -2.72084800 |
| H  | 9.08903400  | 14.43753200 | -3.58216600 | C | 15.18899900 | 11.22067300 | -0.51699900 |
| H  | 8.77506700  | 13.54252300 | -5.83979200 | C | 15.65780000 | 9.56048100  | -2.19471600 |
| H  | 8.75289400  | 11.08203200 | -6.23541000 | H | 15.36563800 | 11.15234900 | -3.72913600 |
| H  | 9.05108400  | 9.54411800  | -4.29749900 | H | 16.79332000 | 11.37371700 | -2.69297600 |
| H  | 9.43622900  | 10.43463100 | -2.04889000 | C | 15.11786300 | 9.72309600  | -0.75985900 |
| Mg | 14.27386200 | 13.67457300 | -2.39796600 | H | 16.18973800 | 11.53057200 | -0.16877600 |
| Br | 16.22546600 | 14.41882400 | -3.73150500 | H | 14.41712000 | 11.60462600 | 0.16085700  |
| O  | 13.10316800 | 15.35999900 | -2.60699500 | H | 16.63515500 | 9.06869900  | -2.21638500 |
| C  | 13.70013600 | 16.67309300 | -2.67885900 | H | 14.97866500 | 8.95713700  | -2.80629600 |
| C  | 11.73655900 | 15.40252000 | -3.09355000 | H | 15.68810000 | 9.15627200  | -0.01851900 |
| C  | 12.51665300 | 17.61069200 | -2.77033300 | H | 14.07356300 | 9.39471600  | -0.69851000 |
| H  | 14.33791000 | 16.79384200 | -1.79396700 | O | 13.33530900 | 12.69272500 | -3.99091600 |
| H  | 14.34276500 | 16.71871200 | -3.56977400 | C | 12.53094800 | 11.48489100 | -3.93995100 |
| C  | 11.56792600 | 16.80147800 | -3.64925300 | C | 13.50685800 | 13.11225300 | -5.36656500 |
| H  | 11.60255000 | 14.59861400 | -3.82732300 | C | 12.51208400 | 10.97416100 | -5.36315500 |
| H  | 11.06700200 | 15.19137400 | -2.24783800 | H | 12.99184600 | 10.81053600 | -3.20701900 |
| H  | 12.78423400 | 18.58384600 | -3.19144200 | H | 11.52331600 | 11.74614900 | -3.59524800 |
| H  | 12.07490000 | 17.77093500 | -1.77776800 | C | 12.51002300 | 12.28210100 | -6.14683100 |
| H  | 11.89866000 | 16.84531900 | -4.69584300 | H | 13.34829200 | 14.19735800 | -5.40993900 |

|   |             |             |             |
|---|-------------|-------------|-------------|
| H | 14.54696000 | 12.91387500 | -5.65945000 |
| H | 11.62719900 | 10.35901300 | -5.55250100 |
| H | 13.41489000 | 10.38734500 | -5.58808400 |
| H | 11.50711400 | 12.72843900 | -6.09932800 |
| H | 12.79631300 | 12.17032400 | -7.19651300 |

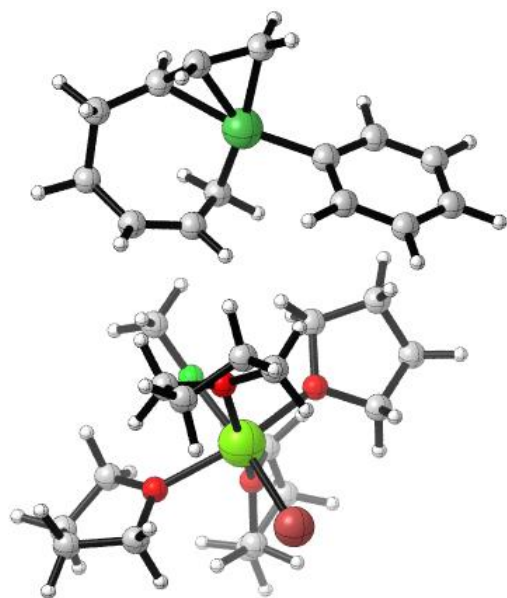

## INT2

|    |             |             |             |
|----|-------------|-------------|-------------|
| Ni | 8.57574900  | 11.32548200 | -0.48656200 |
| C  | 7.13456300  | 10.03129000 | -0.22507200 |
| C  | 7.77316500  | 10.32570700 | 0.99872100  |
| C  | 7.96441800  | 11.65410900 | 1.42960700  |
| C  | 8.86072400  | 11.93110600 | 2.60427400  |
| C  | 10.13151900 | 12.77935800 | 2.32658000  |
| C  | 11.01812100 | 12.16781800 | 1.29464300  |
| C  | 10.69391600 | 12.23823700 | -0.03261300 |
| C  | 9.60874000  | 12.98290600 | -0.62471700 |
| C  | 8.87368400  | 10.84372100 | -2.29343000 |
| C  | 8.03653400  | 11.20930500 | -3.36539300 |
| C  | 8.28813300  | 10.84048300 | -4.68526200 |
| C  | 9.40783800  | 10.07403100 | -5.00413400 |

|    |             |             |             |
|----|-------------|-------------|-------------|
| C  | 10.26435000 | 9.69093800  | -3.97487200 |
| C  | 9.99648000  | 10.07497800 | -2.65983000 |
| H  | 6.24831100  | 10.59341600 | -0.53536600 |
| H  | 7.16166300  | 9.00772700  | -0.59241800 |
| H  | 8.41020000  | 9.55756300  | 1.45113900  |
| H  | 7.16346300  | 12.38143100 | 1.25666300  |
| H  | 9.20648700  | 10.97050300 | 3.01840900  |
| H  | 8.29348100  | 12.42303900 | 3.40946800  |
| H  | 9.81917800  | 13.78993200 | 2.01261100  |
| H  | 10.66322700 | 12.90749400 | 3.28085100  |
| H  | 11.73129500 | 11.40785200 | 1.62671800  |
| H  | 11.31898000 | 11.66845900 | -0.72944900 |
| H  | 9.73112800  | 13.29158900 | -1.66660000 |
| H  | 9.17907800  | 13.77773600 | -0.00604000 |
| H  | 7.13920600  | 11.79723700 | -3.15593700 |
| H  | 7.59826000  | 11.14423000 | -5.47356600 |
| H  | 9.60181800  | 9.77190300  | -6.03215100 |
| H  | 11.14086800 | 9.07818800  | -4.19452500 |
| H  | 10.67931700 | 9.72356200  | -1.87901600 |
| C  | 12.26256700 | 15.10857400 | -0.29359800 |
| H  | 12.38835000 | 15.97533400 | 0.35883300  |
| H  | 12.47531900 | 14.16643000 | 0.22160000  |
| H  | 11.25061300 | 15.05598700 | -0.70373100 |
| F  | 13.17020500 | 15.27313500 | -1.37542900 |
| Mg | 14.63454900 | 14.09284200 | -2.48750600 |
| Br | 16.43454000 | 12.90900100 | -3.65821500 |
| O  | 14.92781600 | 16.01200500 | -3.37825500 |
| C  | 16.21655000 | 16.48170600 | -3.81595400 |
| C  | 13.89329300 | 16.91628100 | -3.80878200 |
| C  | 15.99776300 | 17.95052800 | -4.10612100 |
| H  | 16.93686900 | 16.26648300 | -3.01885400 |
| H  | 16.51612700 | 15.91881600 | -4.71114900 |
| C  | 14.59289500 | 17.92766400 | -4.69779900 |
| H  | 13.11450300 | 16.33533000 | -4.31652800 |
| H  | 13.45204000 | 17.37876400 | -2.91422900 |

|   |             |             |             |
|---|-------------|-------------|-------------|
| H | 16.75160100 | 18.36593100 | -4.78033300 |
| H | 16.01144800 | 18.53113300 | -3.17313700 |
| H | 14.62926100 | 17.56357700 | -5.73266700 |
| H | 14.09491300 | 18.90105100 | -4.69789800 |
| O | 15.93322700 | 14.83464900 | -0.94945300 |
| C | 17.24090800 | 14.30808000 | -0.61324900 |
| C | 15.64007400 | 15.98569800 | -0.13615500 |
| C | 17.57671600 | 14.95525400 | 0.71285700  |
| H | 17.17485800 | 13.21575200 | -0.59297100 |
| H | 17.94705300 | 14.58847300 | -1.40639100 |
| C | 16.94657100 | 16.33233600 | 0.54787400  |
| H | 15.24630500 | 16.77662600 | -0.78617200 |
| H | 14.86292700 | 15.70653700 | 0.59137800  |
| H | 18.65259600 | 14.98126000 | 0.90515600  |
| H | 17.09385600 | 14.41315500 | 1.53752800  |
| H | 17.56764700 | 16.95831000 | -0.10730200 |
| H | 16.79739300 | 16.86822900 | 1.48924600  |
| O | 13.86930100 | 12.47928800 | -1.41454000 |
| C | 13.59181700 | 11.24229900 | -2.14135500 |
| C | 14.31758200 | 12.15659000 | -0.07907100 |
| C | 13.81185800 | 10.13003500 | -1.13304200 |
| H | 12.56566300 | 11.28526900 | -2.53110800 |
| H | 14.30881900 | 11.18564900 | -2.97154600 |
| C | 14.84128900 | 10.74330200 | -0.19020300 |
| H | 15.06355500 | 12.90620500 | 0.21171900  |
| H | 13.45152600 | 12.22237500 | 0.59859300  |
| H | 14.15319300 | 9.20917000  | -1.61389700 |
| H | 12.88371500 | 9.90806800  | -0.58894800 |
| H | 15.83617800 | 10.74166200 | -0.65721600 |
| H | 14.90113800 | 10.23950200 | 0.77891100  |
| O | 13.06130900 | 13.87835900 | -3.82761700 |
| C | 11.65701500 | 13.85097900 | -3.47293400 |
| C | 13.22679000 | 13.58380800 | -5.23347200 |
| C | 10.96494200 | 13.24329500 | -4.66963200 |
| H | 11.54052200 | 13.27162900 | -2.55209900 |

|   |             |             |             |
|---|-------------|-------------|-------------|
| H | 11.33431600 | 14.88685600 | -3.27962900 |
| C | 11.83743100 | 13.73688300 | -5.81867700 |
| H | 13.98598300 | 14.27063100 | -5.62962400 |
| H | 13.60542900 | 12.55776000 | -5.33731100 |
| H | 9.91356400  | 13.53607700 | -4.73724300 |
| H | 10.98619000 | 12.14684600 | -4.60449500 |
| H | 11.62631800 | 14.79259000 | -6.04326400 |
| H | 11.71018400 | 13.16212700 | -6.74013900 |

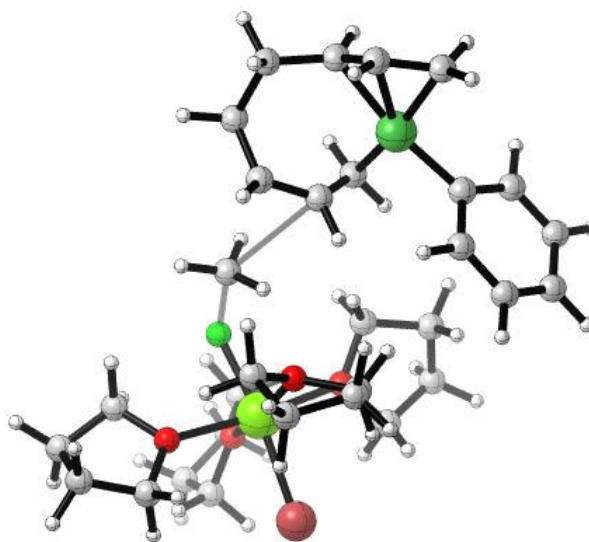

### TS3

|    |             |             |             |
|----|-------------|-------------|-------------|
| Ni | 8.42964400  | 11.32610300 | -0.44008500 |
| C  | 7.14836300  | 9.95326800  | 0.09245600  |
| C  | 7.66900600  | 10.61146100 | 1.22983800  |
| C  | 7.66662200  | 12.01461400 | 1.32731800  |
| C  | 8.44954900  | 12.69969100 | 2.41111700  |
| C  | 9.61857200  | 13.61110500 | 1.94712100  |
| C  | 10.61598400 | 12.87392800 | 1.11579600  |
| C  | 10.28104500 | 12.50326500 | -0.18415700 |
| C  | 9.23617400  | 13.03307700 | -0.98926000 |
| C  | 8.87589900  | 10.53815400 | -2.10842600 |
| C  | 8.09442600  | 10.67429000 | -3.27048800 |

|    |             |             |             |   |             |             |             |
|----|-------------|-------------|-------------|---|-------------|-------------|-------------|
| C  | 8.51064700  | 10.21780800 | -4.51889600 | H | 12.94010300 | 16.53249600 | -3.90239000 |
| C  | 9.74655100  | 9.59030800  | -4.66503200 | H | 13.40652500 | 17.44496200 | -2.44735100 |
| C  | 10.54355600 | 9.42091200  | -3.53655900 | H | 16.50084000 | 18.67459600 | -4.49518800 |
| C  | 10.10915000 | 9.88710400  | -2.29456800 | H | 15.90369300 | 18.66390600 | -2.82128500 |
| H  | 6.21863400  | 10.30445500 | -0.36550400 | H | 14.30783300 | 17.92615200 | -5.33311000 |
| H  | 7.32315100  | 8.88607800  | -0.02026400 | H | 13.85616300 | 19.14465500 | -4.12605800 |
| H  | 8.37093300  | 10.06829500 | 1.87152100  | O | 16.06664500 | 14.73470200 | -0.90319700 |
| H  | 6.80451700  | 12.56495900 | 0.93373500  | C | 17.40439700 | 14.20801800 | -0.76914400 |
| H  | 8.88827300  | 11.93260800 | 3.06860000  | C | 15.86200000 | 15.81512200 | 0.02637200  |
| H  | 7.77662100  | 13.29716400 | 3.04469900  | C | 17.88342900 | 14.73259800 | 0.56734400  |
| H  | 9.20372800  | 14.46546600 | 1.38700900  | H | 17.35186900 | 13.11808100 | -0.84869000 |
| H  | 10.08770900 | 14.03757900 | 2.84562800  | H | 18.01522500 | 14.57235000 | -1.60575300 |
| H  | 11.31717700 | 12.22872900 | 1.65643400  | C | 17.23430100 | 16.11054600 | 0.59896500  |
| H  | 10.98245600 | 11.82641600 | -0.69240900 | H | 15.40401000 | 16.65087000 | -0.51430900 |
| H  | 9.37532700  | 13.04974100 | -2.07073400 | H | 15.15696300 | 15.47793800 | 0.79975700  |
| H  | 8.68023400  | 13.88885400 | -0.59976400 | H | 18.97385400 | 14.75445100 | 0.64461500  |
| H  | 7.11894500  | 11.16153500 | -3.19738400 | H | 17.49365900 | 14.11023300 | 1.38477700  |
| H  | 7.86408200  | 10.34910400 | -5.38671900 | H | 17.78310600 | 16.80031600 | -0.05678400 |
| H  | 10.07343500 | 9.22422600  | -5.63674800 | H | 17.18547800 | 16.55735900 | 1.59595300  |
| H  | 11.50604900 | 8.91138100  | -3.61986900 | O | 13.94720200 | 12.32001600 | -1.57714500 |
| H  | 10.75639000 | 9.70931000  | -1.42895100 | C | 13.65470400 | 11.18661300 | -2.44400700 |
| C  | 12.28760900 | 14.36255200 | -0.08705900 | C | 14.53226200 | 11.84476200 | -0.35330400 |
| H  | 12.72419000 | 14.54278400 | 0.89047100  | C | 14.11014100 | 9.95906300  | -1.67172500 |
| H  | 12.41949100 | 13.38348800 | -0.50899200 | H | 12.57822700 | 11.18105800 | -2.66369900 |
| H  | 11.37004200 | 14.88853500 | -0.32379900 | H | 14.23247400 | 11.33165600 | -3.36444300 |
| F  | 13.34744200 | 15.15903900 | -1.08054300 | C | 15.17022200 | 10.52831100 | -0.73369800 |
| Mg | 14.57683500 | 14.21224200 | -2.37868600 | H | 15.22438000 | 12.61764200 | 0.00768000  |
| Br | 16.33188100 | 13.14214800 | -3.79142400 | H | 13.73410000 | 11.71010800 | 0.39645000  |
| O  | 14.83811200 | 16.15570900 | -3.18854600 | H | 14.49182700 | 9.17917500  | -2.33647300 |
| C  | 16.07573800 | 16.69220400 | -3.68217200 | H | 13.27878000 | 9.53476200  | -1.09259100 |
| C  | 13.76008300 | 17.07895700 | -3.42034100 | H | 16.10425900 | 10.71300100 | -1.28165200 |
| C  | 15.81458500 | 18.17856700 | -3.80331100 | H | 15.38092000 | 9.89030700  | 0.12930100  |
| H  | 16.86359500 | 16.41244900 | -2.97399800 | O | 12.99149500 | 13.99473100 | -3.75664400 |
| H  | 16.30656700 | 16.23247300 | -4.65387900 | C | 11.60306200 | 13.79725100 | -3.40884000 |
| C  | 14.36197200 | 18.18548200 | -4.26757100 | C | 13.17638500 | 13.82409300 | -5.17858000 |

|   |             |             |             |
|---|-------------|-------------|-------------|
| C | 10.96682700 | 13.20040200 | -4.64561500 |
| H | 11.54328600 | 13.14559600 | -2.53224400 |
| H | 11.16798200 | 14.77409600 | -3.14359200 |
| C | 11.77549100 | 13.86624000 | -5.75417400 |
| H | 13.85376100 | 14.61598400 | -5.52157600 |
| H | 13.66849100 | 12.85859100 | -5.35874700 |
| H | 9.89109900  | 13.39231800 | -4.69473000 |
| H | 11.10067200 | 12.10848800 | -4.65588500 |
| H | 11.44734700 | 14.90590600 | -5.89504900 |
| H | 11.70634900 | 13.35426700 | -6.71794400 |

|    |             |             |             |
|----|-------------|-------------|-------------|
| C  | 10.17630700 | 12.79273600 | -0.38193100 |
| C  | 8.95304500  | 13.12892100 | -0.92213500 |
| C  | 9.10678400  | 10.70894000 | -2.43940200 |
| C  | 8.18591000  | 11.13437400 | -3.40817400 |
| C  | 8.34954000  | 10.84657400 | -4.76201200 |
| C  | 9.46314700  | 10.13441700 | -5.19763200 |
| C  | 10.39050200 | 9.68909800  | -4.26051300 |
| C  | 10.19251300 | 9.95300700  | -2.90585400 |
| H  | 7.24336600  | 9.43894100  | -0.45949000 |
| H  | 8.77396800  | 8.46732100  | -0.69836200 |
| H  | 9.78093900  | 9.47975500  | 1.34547900  |
| H  | 7.39254800  | 11.43966600 | 1.17392200  |
| H  | 9.95876900  | 11.26682600 | 2.85562700  |
| H  | 8.42223900  | 11.96540900 | 3.35675700  |
| H  | 8.77827800  | 13.88264300 | 1.76824100  |
| H  | 10.05570300 | 13.74173100 | 2.95886100  |
| H  | 11.40887200 | 12.41035700 | 1.29840900  |
| H  | 10.99545900 | 12.57365500 | -1.07711800 |
| H  | 8.83351700  | 13.25857800 | -1.99577600 |
| H  | 8.18646800  | 13.59737200 | -0.30136800 |
| H  | 7.31273800  | 11.71677700 | -3.10490700 |
| H  | 7.60845400  | 11.19075400 | -5.48215400 |
| H  | 9.60180200  | 9.91979100  | -6.25533600 |
| H  | 11.26192200 | 9.11915800  | -4.58099200 |
| H  | 10.91519000 | 9.55249300  | -2.18996300 |
| C  | 11.39503000 | 14.51594000 | 0.84736800  |
| H  | 11.88452700 | 14.78646600 | 1.79228700  |
| H  | 12.15234400 | 14.53198300 | 0.05096300  |
| H  | 10.66515800 | 15.30280800 | 0.61193100  |
| F  | 13.44398700 | 15.45220900 | -1.45015800 |
| Mg | 14.44633200 | 14.22930300 | -2.40640600 |
| Br | 16.06521400 | 12.62738200 | -3.51117400 |
| O  | 15.02122000 | 15.78503700 | -3.83529000 |
| C  | 16.34294800 | 16.33279200 | -3.86261500 |
| C  | 14.04290400 | 16.81816900 | -4.04625500 |

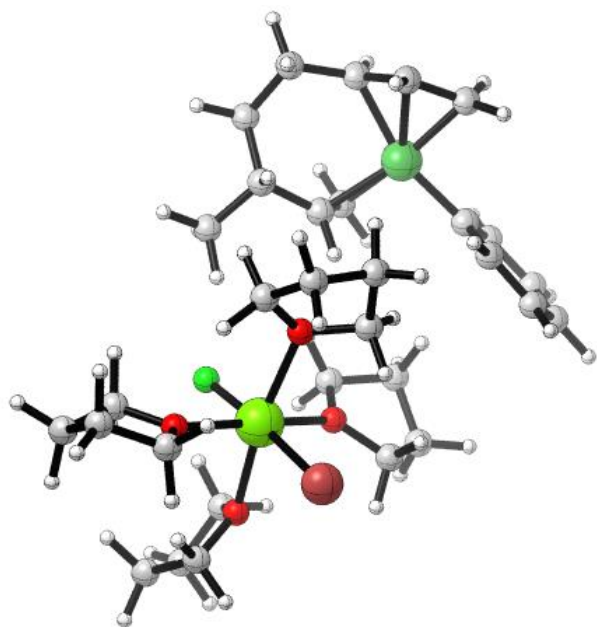

#### INT4

|    |             |             |             |
|----|-------------|-------------|-------------|
| Ni | 8.97481800  | 11.14443300 | -0.58727200 |
| C  | 8.31182800  | 9.34299300  | -0.25027700 |
| C  | 8.83641400  | 9.87019500  | 0.95339800  |
| C  | 8.42539400  | 11.13166400 | 1.38596100  |
| C  | 9.10402900  | 11.86357400 | 2.50041700  |
| C  | 9.61474800  | 13.24051300 | 2.08638300  |
| C  | 10.66922200 | 13.17332600 | 0.98962800  |

|   |             |             |             |
|---|-------------|-------------|-------------|
| C | 16.15272000 | 17.83644400 | -3.77376900 |
| H | 16.90481200 | 15.90913200 | -3.02269100 |
| H | 16.83432500 | 16.02516300 | -4.79640000 |
| C | 14.83231900 | 18.02718100 | -4.51187500 |
| H | 13.31905500 | 16.44745700 | -4.78470300 |
| H | 13.52172100 | 16.97509500 | -3.09141900 |
| H | 16.98657700 | 18.39654900 | -4.20761400 |
| H | 16.04435200 | 18.14153300 | -2.72338200 |
| H | 14.99749800 | 17.98863000 | -5.59656200 |
| H | 14.33096500 | 18.97122200 | -4.27845500 |
| O | 16.06952300 | 14.75805800 | -1.00483200 |
| C | 17.35938100 | 14.16343800 | -0.77514600 |
| C | 15.85608600 | 15.85859800 | -0.10328100 |
| C | 17.84577400 | 14.77713800 | 0.52392100  |
| H | 17.24393000 | 13.07424200 | -0.75700600 |
| H | 18.01714200 | 14.40814900 | -1.62147100 |
| C | 17.22980300 | 16.16924400 | 0.45375300  |
| H | 15.37651900 | 16.66726200 | -0.66168100 |
| H | 15.15154500 | 15.53894000 | 0.67970800  |
| H | 18.93622100 | 14.77332200 | 0.60990700  |
| H | 17.43351800 | 14.22930300 | 1.38309700  |
| H | 17.79343200 | 16.79774800 | -0.25104300 |
| H | 17.19040200 | 16.68819400 | 1.41614100  |
| O | 13.56044500 | 12.57187600 | -1.28351700 |
| C | 13.24508700 | 11.33112400 | -1.95378400 |
| C | 14.14725100 | 12.29845700 | -0.00289800 |
| C | 13.31574800 | 10.27526700 | -0.87062000 |
| H | 12.25816900 | 11.43611000 | -2.42190700 |
| H | 14.00401600 | 11.16383200 | -2.73221700 |
| C | 14.45153100 | 10.81257800 | -0.00604100 |
| H | 15.02733600 | 12.93973500 | 0.11944200  |
| H | 13.42188700 | 12.56454300 | 0.78122100  |
| H | 13.50662500 | 9.27659000  | -1.27570900 |
| H | 12.37681300 | 10.23588700 | -0.29416200 |
| H | 15.41468100 | 10.62748400 | -0.49973600 |

|   |             |             |             |
|---|-------------|-------------|-------------|
| H | 14.48611800 | 10.38567700 | 1.00099500  |
| O | 12.83950400 | 13.90689500 | -3.75858600 |
| C | 11.51591200 | 14.39074100 | -3.48819800 |
| C | 12.89767700 | 13.29439300 | -5.06004600 |
| C | 10.63932000 | 13.58429700 | -4.41839200 |
| H | 11.32139200 | 14.26393500 | -2.41876800 |
| H | 11.47077600 | 15.46872600 | -3.71254000 |
| C | 11.51814800 | 13.50873300 | -5.66199100 |
| H | 13.72139300 | 13.75501600 | -5.61773500 |
| H | 13.12716100 | 12.22767700 | -4.92882000 |
| H | 9.65975200  | 14.04090600 | -4.59580100 |
| H | 10.47488700 | 12.57927500 | -4.00416800 |
| H | 11.47841000 | 14.45905500 | -6.21266800 |
| H | 11.23309500 | 12.70563500 | -6.34837800 |

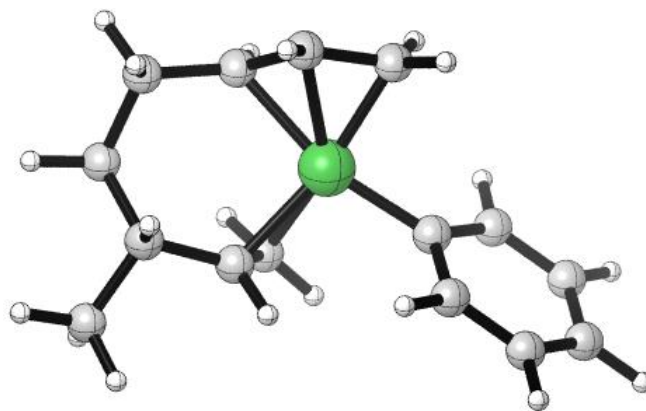

**INT5**

|    |             |             |             |
|----|-------------|-------------|-------------|
| Ni | 8.60993500  | 11.36927200 | -0.48948200 |
| C  | 7.30545200  | 9.99563800  | -0.03448000 |
| C  | 7.77371400  | 10.59655500 | 1.15755700  |
| C  | 7.78298100  | 11.98736500 | 1.27847000  |
| C  | 8.50959200  | 12.69228200 | 2.38100900  |
| C  | 9.54678500  | 13.69039500 | 1.87179100  |
| C  | 10.64548700 | 13.03915600 | 1.04052500  |
| C  | 10.24382700 | 12.56614500 | -0.33353600 |



|   |             |             |             |
|---|-------------|-------------|-------------|
| C | 9.29277900  | 13.14260800 | -1.14973700 |
| C | 8.92198100  | 10.52834400 | -2.16464800 |
| C | 8.00697200  | 10.57766300 | -3.22523900 |
| C | 8.28649500  | 10.01146800 | -4.46614700 |
| C | 9.49780500  | 9.36121100  | -4.68152300 |
| C | 10.41922700 | 9.28666300  | -3.64389500 |
| C | 10.13161100 | 9.86460000  | -2.40822800 |
| H | 6.40474100  | 10.38424000 | -0.51900400 |
| H | 7.48487700  | 8.93913600  | -0.20933500 |
| H | 8.43613900  | 10.02580900 | 1.81527900  |
| H | 6.97417500  | 12.55547200 | 0.80006500  |
| H | 9.02245900  | 11.94696200 | 3.00881400  |
| H | 7.79789100  | 13.21051400 | 3.03919000  |
| H | 9.05969100  | 14.49005500 | 1.29152500  |
| H | 10.01379900 | 14.19292300 | 2.73023000  |
| H | 11.00836800 | 12.16060400 | 1.60355600  |
| H | 11.01824500 | 11.97246900 | -0.83141300 |
| H | 9.37127200  | 13.06760300 | -2.23130100 |
| H | 8.64396400  | 13.93593600 | -0.77377900 |
| H | 7.04292700  | 11.07269500 | -3.08564300 |
| H | 7.55254700  | 10.07524500 | -5.26828800 |
| H | 9.71863100  | 8.91401500  | -5.64844400 |
| H | 11.36964500 | 8.77649000  | -3.79490300 |
| H | 10.87742200 | 9.77607700  | -1.61404900 |
| C | 11.82153500 | 14.00223300 | 0.86028700  |
| H | 12.24030000 | 14.29950900 | 1.82866800  |
| H | 12.62606200 | 13.55556400 | 0.26538800  |
| H | 11.48686300 | 14.90859600 | 0.33883200  |

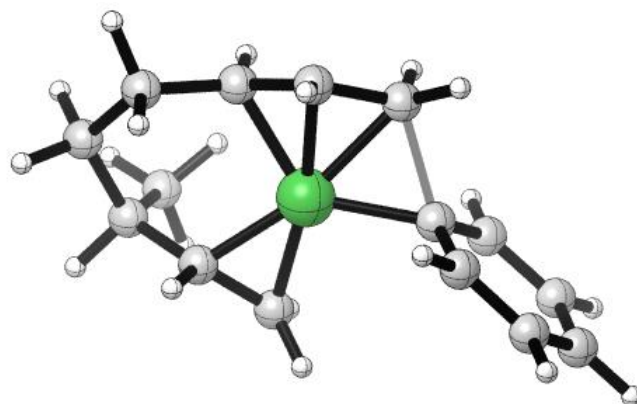

### TS6

|    |             |             |             |
|----|-------------|-------------|-------------|
| Ni | 8.65606200  | 11.03932700 | 0.06690900  |
| C  | 6.70722000  | 10.42732600 | 0.00644400  |
| C  | 7.26584800  | 10.60890200 | 1.34537900  |
| C  | 7.83856100  | 11.84695700 | 1.66470400  |
| C  | 8.72010800  | 12.11004300 | 2.84259400  |
| C  | 9.77669000  | 13.18744000 | 2.53522000  |
| C  | 10.34874700 | 13.19762900 | 1.09324800  |
| C  | 10.36880200 | 11.81743800 | 0.47664500  |
| C  | 10.27760600 | 11.51200400 | -0.89628400 |
| C  | 7.88414300  | 9.90637800  | -1.34425000 |
| C  | 7.57684000  | 10.40861300 | -2.61448200 |
| C  | 7.76953000  | 9.63995700  | -3.75528000 |
| C  | 8.25729100  | 8.34003700  | -3.65115900 |
| C  | 8.53174900  | 7.81021400  | -2.39256000 |
| C  | 8.32294900  | 8.57661800  | -1.25366200 |
| H  | 6.17782100  | 11.29080500 | -0.41091700 |
| H  | 6.10452000  | 9.52931100  | -0.11722700 |
| H  | 7.47243900  | 9.72638100  | 1.95648400  |
| H  | 7.35349600  | 12.74167000 | 1.25128800  |
| H  | 9.21154900  | 11.16891500 | 3.12957800  |
| H  | 8.13758700  | 12.43224900 | 3.71833900  |
| H  | 9.34612100  | 14.17921400 | 2.73582900  |
| H  | 10.59596700 | 13.07342800 | 3.25717200  |
| H  | 11.40306300 | 13.51122400 | 1.18376500  |
| H  | 10.90049000 | 11.08871700 | 1.10398800  |

|   |             |             |             |
|---|-------------|-------------|-------------|
| H | 10.77036400 | 10.62180400 | -1.28795200 |
| H | 10.11485300 | 12.29290500 | -1.64124600 |
| H | 7.20312700  | 11.42902400 | -2.71019000 |
| H | 7.54313500  | 10.05931700 | -4.73359500 |
| H | 8.40836300  | 7.73803100  | -4.54385900 |
| H | 8.89740000  | 6.78951600  | -2.29919800 |
| H | 8.50419800  | 8.14077900  | -0.26906800 |
| C | 9.67222700  | 14.24006400 | 0.21109200  |
| H | 9.68577300  | 15.22437400 | 0.69340400  |
| H | 10.18130200 | 14.33840000 | -0.75430900 |
| H | 8.62513000  | 13.98085200 | 0.00536400  |

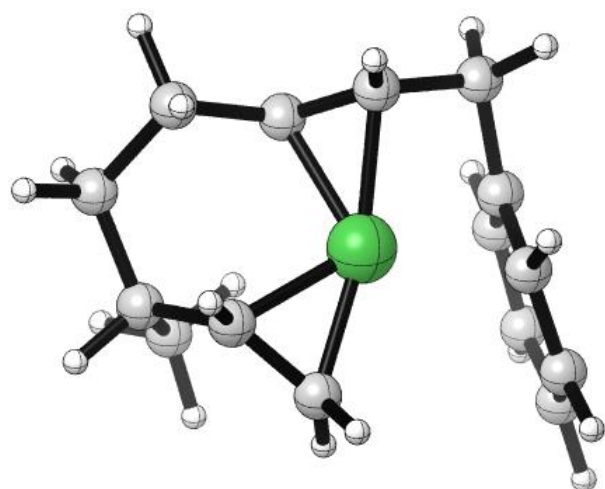

### INT7

|    |             |             |             |
|----|-------------|-------------|-------------|
| Ni | 8.95824600  | 10.53311300 | 0.02186600  |
| C  | 6.43337000  | 9.81008000  | 0.41967000  |
| C  | 7.47971800  | 10.35415600 | 1.36267400  |
| C  | 7.90751700  | 11.67208300 | 1.26384200  |
| C  | 8.71481900  | 12.35502500 | 2.32528000  |
| C  | 9.70598900  | 13.38935100 | 1.77983700  |
| C  | 10.46401500 | 12.96594900 | 0.49786500  |
| C  | 10.60412000 | 11.46236800 | 0.41615500  |
| C  | 10.72296200 | 10.70860800 | -0.76935200 |

|   |             |             |             |
|---|-------------|-------------|-------------|
| C | 7.17537900  | 9.80129400  | -0.89473400 |
| C | 6.80725500  | 10.63960100 | -1.97311800 |
| C | 7.42545500  | 10.52630100 | -3.20111100 |
| C | 8.42476500  | 9.56030700  | -3.41473900 |
| C | 8.81401400  | 8.74880300  | -2.37330300 |
| C | 8.25627900  | 8.90185100  | -1.08477000 |
| H | 5.53140200  | 10.43574600 | 0.36685800  |
| H | 6.11408600  | 8.79899100  | 0.70035400  |
| H | 7.79616600  | 9.74849000  | 2.21596000  |
| H | 7.32376800  | 12.34377300 | 0.61889700  |
| H | 9.25044100  | 11.58509600 | 2.89994300  |
| H | 8.04717400  | 12.85473400 | 3.04399700  |
| H | 9.17183100  | 14.32925900 | 1.57474000  |
| H | 10.42295800 | 13.62795100 | 2.57692200  |
| H | 11.48384600 | 13.38024400 | 0.57919700  |
| H | 11.05975400 | 11.03233700 | 1.31800500  |
| H | 11.28334000 | 9.77253000  | -0.74634400 |
| H | 10.69938400 | 11.18036400 | -1.75428700 |
| H | 5.99933200  | 11.35629500 | -1.82736400 |
| H | 7.11415200  | 11.17059900 | -4.02044800 |
| H | 8.87732300  | 9.45221800  | -4.39689900 |
| H | 9.58350800  | 7.99501900  | -2.52748600 |
| H | 8.41629800  | 8.10894500  | -0.34954700 |
| C | 9.84761800  | 13.58135100 | -0.75246800 |
| H | 9.78845100  | 14.67223900 | -0.65902900 |
| H | 10.43960100 | 13.35710100 | -1.64715200 |
| H | 8.83234800  | 13.20093900 | -0.92809500 |

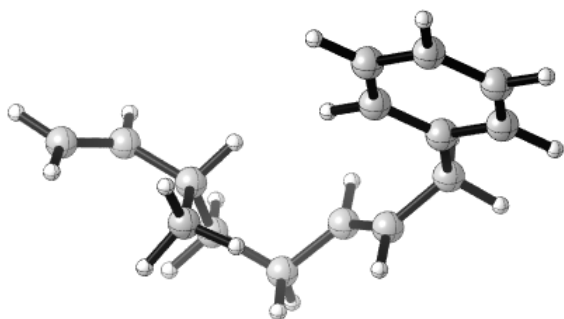

**P8**

|   |             |             |             |
|---|-------------|-------------|-------------|
| C | 3.33286800  | 0.21195300  | 0.31856700  |
| C | 3.61392700  | 1.72021300  | 0.36341800  |
| H | 2.41881000  | 0.03983700  | 0.91732100  |
| C | 2.50192800  | 2.60220300  | -0.20765000 |
| H | 3.79594000  | 2.01002700  | 1.41054200  |
| H | 4.55325000  | 1.91884000  | -0.17469200 |
| C | 1.18232600  | 2.36177500  | 0.44966800  |
| H | 2.79945700  | 3.65328300  | -0.07509400 |
| H | 2.40501900  | 2.44924500  | -1.29185500 |
| H | 1.16032900  | 2.45460600  | 1.54151700  |
| C | 4.45599000  | -0.50679600 | 1.00767100  |
| C | 5.24588000  | -1.44212300 | 0.48866200  |
| H | 4.63511500  | -0.18663700 | 2.03809900  |
| H | 6.04772100  | -1.89012300 | 1.06964700  |
| H | 5.12844300  | -1.80396900 | -0.53082000 |
| C | 0.06022700  | 2.02216200  | -0.18343600 |
| C | -1.24636500 | 1.73744300  | 0.48604300  |
| H | 0.07995300  | 1.90831000  | -1.27167300 |
| H | -2.01342500 | 2.44733000  | 0.14222100  |
| H | -1.13675600 | 1.90785500  | 1.56817800  |
| C | -1.74345300 | 0.33175000  | 0.23959000  |
| C | 3.07067200  | -0.28255400 | -1.09371200 |
| C | -3.07997900 | 0.08939600  | -0.07508000 |
| C | -3.54253400 | -1.20705300 | -0.27467500 |
| C | -2.66859500 | -2.28296100 | -0.16673800 |
| C | -1.33122700 | -2.05307500 | 0.14168900  |
| C | -0.87395500 | -0.75632800 | 0.34091000  |

|   |             |             |             |
|---|-------------|-------------|-------------|
| H | -3.76651800 | 0.93102500  | -0.16356100 |
| H | -4.58875400 | -1.37665100 | -0.51956600 |
| H | -3.02746900 | -3.29719300 | -0.32535100 |
| H | -0.63947300 | -2.88840300 | 0.22550400  |
| H | 0.17477700  | -0.57521300 | 0.57793200  |
| H | 3.91694500  | -0.04728600 | -1.75378600 |
| H | 2.17205500  | 0.17930200  | -1.51685700 |
| H | 2.91798200  | -1.36770800 | -1.11362700 |

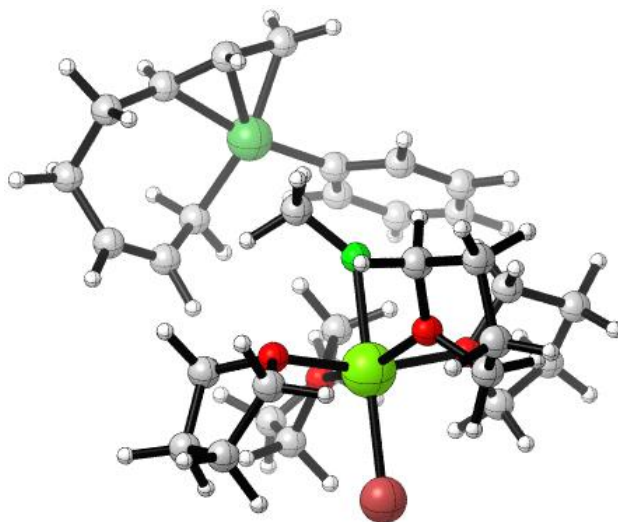

**INT9**

|    |             |             |             |
|----|-------------|-------------|-------------|
| Ni | 8.37965400  | 11.72845800 | 0.17481000  |
| C  | 6.63660500  | 11.36544700 | -0.65955500 |
| C  | 6.59404100  | 11.09584000 | 0.72306700  |
| C  | 7.03677700  | 12.05247300 | 1.65466100  |
| C  | 7.13214600  | 11.71936100 | 3.11281300  |
| C  | 8.32816500  | 12.34833400 | 3.85462500  |
| C  | 9.63053300  | 11.68091900 | 3.55093400  |
| C  | 10.26092500 | 11.79978500 | 2.36595800  |
| C  | 9.83498100  | 12.57180100 | 1.19594100  |
| C  | 9.33470300  | 11.53398600 | -1.46457400 |
| C  | 10.11763100 | 12.57379700 | -2.00800400 |
| C  | 10.83426700 | 12.45638400 | -3.19808900 |

|    |             |             |             |   |             |            |             |
|----|-------------|-------------|-------------|---|-------------|------------|-------------|
| C  | 10.80821000 | 11.26825100 | -3.92391600 | O | 11.50821200 | 7.34622200 | 2.75559900  |
| C  | 10.02528300 | 10.22110100 | -3.44357500 | C | 11.67849100 | 6.16609000 | 3.56159200  |
| C  | 9.31080700  | 10.36414100 | -2.25404500 | C | 11.71433200 | 8.45037100 | 3.65619000  |
| H  | 6.33942700  | 12.34808300 | -1.03445700 | C | 12.79387400 | 6.49129000 | 4.55285400  |
| H  | 6.44437800  | 10.55341200 | -1.35943400 | H | 10.72284600 | 5.96892400 | 4.07169200  |
| H  | 6.52238300  | 10.05408800 | 1.06147400  | H | 11.90588800 | 5.33543000 | 2.88465800  |
| H  | 6.81946000  | 13.10861400 | 1.44592500  | C | 12.88826700 | 8.02847100 | 4.52499100  |
| H  | 7.18163500  | 10.62374800 | 3.23741900  | H | 11.87928200 | 9.34651900 | 3.04811000  |
| H  | 6.20954400  | 12.04199800 | 3.62230000  | H | 10.79382600 | 8.59268600 | 4.24260000  |
| H  | 8.36841200  | 13.41762400 | 3.58734500  | H | 13.73714500 | 6.04930200 | 4.21927700  |
| H  | 8.13122800  | 12.31335800 | 4.93451500  | H | 12.55841200 | 6.10338800 | 5.54859300  |
| H  | 10.06271800 | 11.04430200 | 4.32651000  | H | 13.83487600 | 8.33392500 | 4.06474400  |
| H  | 11.18391100 | 11.21262500 | 2.24710000  | H | 12.83344100 | 8.48177600 | 5.51887700  |
| H  | 10.69832700 | 12.81071200 | 0.55986900  | O | 11.33032300 | 5.49532200 | 0.49737400  |
| H  | 9.37841900  | 13.52620300 | 1.50619200  | C | 9.94690900  | 5.14884700 | 0.69257900  |
| H  | 11.41834600 | 13.30163300 | -3.56334300 | C | 12.07216300 | 4.34885100 | 0.02982400  |
| H  | 9.94565900  | 9.29421000  | -4.01702100 | C | 9.82456400  | 3.69815300 | 0.25203300  |
| C  | 9.26558700  | 8.75039600  | 1.02370200  | H | 9.71077100  | 5.28566000 | 1.75856800  |
| H  | 9.70702900  | 9.23873400  | 1.89795000  | H | 9.32625000  | 5.83743000 | 0.10831100  |
| F  | 10.29471200 | 8.08765700  | 0.29777000  | C | 11.23746200 | 3.16838000 | 0.47172900  |
| Mg | 12.27489200 | 7.41694300  | 0.77403400  | H | 12.15849100 | 4.40356300 | -1.06812800 |
| Br | 14.52327700 | 6.57000200  | 1.36169500  | H | 13.07493600 | 4.41460900 | 0.46488700  |
| O  | 12.74679200 | 9.44919400  | 0.70796900  | H | 9.56623800  | 3.64542600 | -0.81384100 |
| C  | 13.95084100 | 10.05643200 | 1.23697300  | H | 9.05551800  | 3.15658600 | 0.80964800  |
| C  | 12.15189700 | 10.33533400 | -0.29331200 | H | 11.45637300 | 2.25854100 | -0.09385500 |
| C  | 13.87083400 | 11.50862100 | 0.81724600  | H | 11.41385400 | 2.95996300 | 1.53563700  |
| H  | 13.96713100 | 9.89080500  | 2.32085300  | O | 12.46368900 | 7.32872800 | -1.32336300 |
| H  | 14.82382900 | 9.54752000  | 0.80507900  | C | 11.40917700 | 7.10414300 | -2.28218900 |
| C  | 13.19641700 | 11.39846200 | -0.54489200 | C | 13.70549800 | 7.61140500 | -1.99897500 |
| H  | 11.89509100 | 9.73644100  | -1.17118100 | C | 12.11585300 | 6.99204500 | -3.61788200 |
| H  | 11.22691900 | 10.75556400 | 0.11683400  | H | 10.86359200 | 6.20129300 | -1.97887700 |
| H  | 14.85679700 | 11.98124700 | 0.78495200  | H | 10.72667700 | 7.96491600 | -2.25615300 |
| H  | 13.23531800 | 12.07927400 | 1.50704100  | C | 13.29631700 | 7.93809400 | -3.42022100 |
| H  | 13.91545200 | 11.06912000 | -1.30897000 | H | 14.20251900 | 8.42574900 | -1.45933800 |
| H  | 12.73505000 | 12.32614300 | -0.89551400 | H | 14.34431600 | 6.71863900 | -1.93901600 |

|   |             |             |             |
|---|-------------|-------------|-------------|
| H | 11.46766200 | 7.27125100  | -4.45379600 |
| H | 12.47231900 | 5.96628600  | -3.78467100 |
| H | 12.95649000 | 8.98113900  | -3.49602900 |
| H | 14.10741500 | 7.78366600  | -4.13707500 |
| H | 11.35818100 | 11.17117900 | -4.85889400 |
| H | 8.83848400  | 9.51386000  | 0.35911000  |
| H | 8.53545900  | 7.99092000  | 1.31677700  |
| H | 10.17888800 | 13.52327400 | -1.47095200 |
| H | 8.70220200  | 9.51172800  | -1.93170200 |

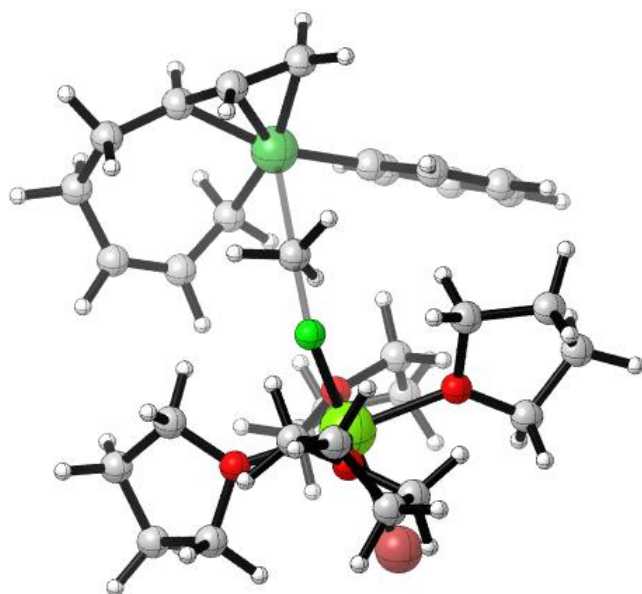

**TS10**

|    |             |             |             |
|----|-------------|-------------|-------------|
| Ni | 8.52439700  | 11.62431900 | 0.13657900  |
| C  | 6.85221000  | 11.42510800 | -0.90664800 |
| C  | 6.64423300  | 11.01293500 | 0.42385300  |
| C  | 7.02257400  | 11.84155100 | 1.49105200  |
| C  | 6.93002000  | 11.39933700 | 2.91741000  |
| C  | 8.02454500  | 11.97205200 | 3.83819100  |
| C  | 9.35085200  | 11.30080800 | 3.66937700  |
| C  | 10.13511900 | 11.45497000 | 2.58779200  |
| C  | 9.88009200  | 12.27816500 | 1.40182500  |

|    |             |             |             |
|----|-------------|-------------|-------------|
| C  | 9.61387700  | 11.76981300 | -1.42825700 |
| C  | 10.45488600 | 12.88362400 | -1.62102000 |
| C  | 11.30037700 | 13.01673800 | -2.72187100 |
| C  | 11.34813500 | 12.02602100 | -3.69801400 |
| C  | 10.50276100 | 10.92752900 | -3.56965600 |
| C  | 9.65619400  | 10.82103900 | -2.46738500 |
| H  | 6.64585700  | 12.45865300 | -1.19489000 |
| H  | 6.70817300  | 10.70592600 | -1.71117300 |
| H  | 6.50316400  | 9.94684800  | 0.63639800  |
| H  | 6.91177600  | 12.92638500 | 1.35111200  |
| H  | 6.95411500  | 10.29838100 | 2.97120200  |
| H  | 5.95139100  | 11.70114300 | 3.32329100  |
| H  | 8.10582300  | 13.05298900 | 3.63669100  |
| H  | 7.69143700  | 11.88336900 | 4.88015200  |
| H  | 9.66432000  | 10.61907300 | 4.46335600  |
| H  | 11.05366400 | 10.85423900 | 2.55344900  |
| H  | 10.82229500 | 12.47125400 | 0.87279600  |
| H  | 9.44694800  | 13.25261500 | 1.68742400  |
| H  | 11.93173300 | 13.90030800 | -2.81360200 |
| H  | 10.48494800 | 10.15967100 | -4.34578200 |
| C  | 9.48175500  | 9.38034000  | 0.42860000  |
| H  | 10.40209100 | 9.90408800  | 0.23716300  |
| F  | 10.24116200 | 7.80201600  | 0.63028100  |
| Mg | 12.17463900 | 7.38533500  | 0.61408900  |
| Br | 14.61982800 | 6.81105500  | 0.52136100  |
| O  | 12.59911000 | 9.47924700  | 0.63381900  |
| C  | 13.54594600 | 10.00337300 | 1.59527700  |
| C  | 12.76487900 | 10.17529000 | -0.63193600 |
| C  | 14.05485800 | 11.28902400 | 0.97885700  |
| H  | 13.01958400 | 10.14336300 | 2.54746900  |
| H  | 14.34685100 | 9.25919900  | 1.71832900  |
| C  | 14.06688600 | 10.93195600 | -0.50316100 |
| H  | 12.74110200 | 9.42981900  | -1.43304900 |
| H  | 11.91805400 | 10.86154600 | -0.77340500 |
| H  | 15.03401800 | 11.57785300 | 1.37146000  |

|   |             |             |             |
|---|-------------|-------------|-------------|
| H | 13.34698900 | 12.10894300 | 1.16564300  |
| H | 14.92020200 | 10.27961300 | -0.73291800 |
| H | 14.09306300 | 11.80231200 | -1.16595000 |
| O | 12.04198800 | 7.35610300  | 2.76387900  |
| C | 12.96813100 | 6.70987100  | 3.64481400  |
| C | 11.07393700 | 7.99683700  | 3.60187600  |
| C | 13.21467900 | 7.75764800  | 4.71203100  |
| H | 12.49124700 | 5.80670200  | 4.06373400  |
| H | 13.84015200 | 6.42777200  | 3.04648700  |
| C | 11.83890800 | 8.43048700  | 4.85997500  |
| H | 10.62167200 | 8.82116700  | 3.04317700  |
| H | 10.28151000 | 7.26982000  | 3.84114200  |
| H | 13.96149900 | 8.47240900  | 4.34648600  |
| H | 13.58823900 | 7.33173800  | 5.64774400  |
| H | 11.92468900 | 9.52054900  | 4.92795900  |
| H | 11.31897700 | 8.09275100  | 5.76262900  |
| O | 11.57625100 | 5.33685100  | 0.75246300  |
| C | 10.42141400 | 4.89030500  | 1.48106900  |
| C | 12.02517600 | 4.32027000  | -0.15900400 |
| C | 9.96730500  | 3.63698400  | 0.75841900  |
| H | 10.72429500 | 4.67740900  | 2.51806300  |
| H | 9.68916900  | 5.70349200  | 1.48562100  |
| C | 11.29315600 | 3.06452700  | 0.26885000  |
| H | 11.74787100 | 4.62609600  | -1.18069000 |
| H | 13.11747200 | 4.27525700  | -0.09539400 |
| H | 9.33100400  | 3.90272000  | -0.09698100 |
| H | 9.40162900  | 2.95801200  | 1.40291200  |
| H | 11.18671300 | 2.34172000  | -0.54509900 |
| H | 11.82491000 | 2.57334000  | 1.09377400  |
| O | 11.99107800 | 7.14412700  | -1.51072600 |
| C | 10.68643300 | 7.20510500  | -2.12302500 |
| C | 13.01149200 | 7.04232800  | -2.52723700 |
| C | 10.91427100 | 6.87972700  | -3.58547500 |
| H | 10.02999500 | 6.50476700  | -1.59215100 |
| H | 10.29822700 | 8.22499000  | -1.99524500 |

|   |             |             |             |
|---|-------------|-------------|-------------|
| C | 12.31161800 | 7.44591500  | -3.80768900 |
| H | 13.85370200 | 7.68100300  | -2.24218200 |
| H | 13.37338900 | 6.00402900  | -2.55618300 |
| H | 10.15023400 | 7.32452500  | -4.23077600 |
| H | 10.91133200 | 5.79337000  | -3.74952000 |
| H | 12.26315700 | 8.54194300  | -3.88304000 |
| H | 12.81092000 | 7.05898900  | -4.70041700 |
| H | 12.01180900 | 12.12081200 | -4.55518300 |
| H | 8.85088100  | 9.09287100  | -0.40328600 |
| H | 9.05280900  | 9.44074800  | 1.42277000  |
| H | 10.46850900 | 13.67836400 | -0.87309000 |
| H | 8.99006300  | 9.95313900  | -2.43341300 |

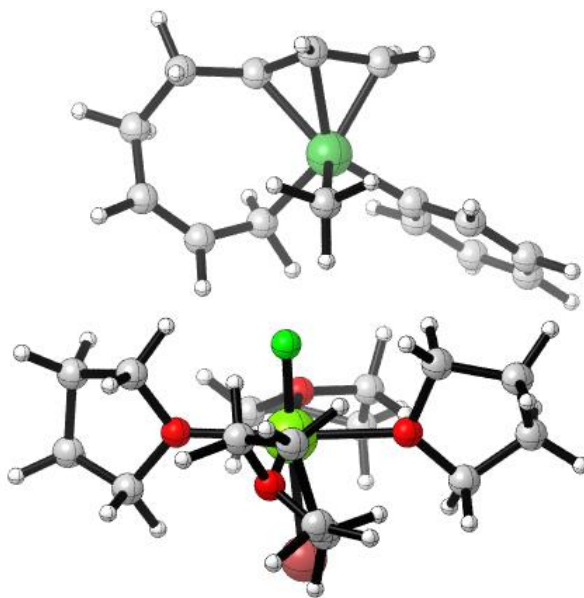

### INT11

|    |            |             |             |
|----|------------|-------------|-------------|
| Ni | 8.52576200 | 11.68571200 | 0.10552200  |
| C  | 6.86726100 | 12.30130700 | -0.87795700 |
| C  | 6.50649800 | 11.94708700 | 0.43247100  |
| C  | 7.21145200 | 12.46853700 | 1.52148400  |
| C  | 6.98032200 | 12.05676500 | 2.93821400  |
| C  | 8.23269300 | 12.12113600 | 3.83718600  |

|    |             |             |             |   |             |             |             |
|----|-------------|-------------|-------------|---|-------------|-------------|-------------|
| C  | 9.15511300  | 10.96048900 | 3.64071000  | H | 12.80827300 | 9.19359400  | -1.40903800 |
| C  | 9.91319200  | 10.77757600 | 2.54848500  | H | 11.83630700 | 10.61765000 | -0.96818500 |
| C  | 10.00065000 | 11.66921900 | 1.39140100  | H | 14.77532700 | 11.67724500 | 1.32818900  |
| C  | 9.53611800  | 11.67854800 | -1.49762900 | H | 13.11190200 | 12.17209800 | 0.94614800  |
| C  | 10.44414800 | 12.74613000 | -1.55496100 | H | 14.84870800 | 10.20678200 | -0.64189100 |
| C  | 11.27696100 | 12.93440600 | -2.65720800 | H | 14.01504700 | 11.64898800 | -1.28330000 |
| C  | 11.23571200 | 12.04399500 | -3.72490300 | O | 12.25814400 | 7.38124100  | 2.85636200  |
| C  | 10.33009300 | 10.98761900 | -3.69184200 | C | 13.32123500 | 7.09465800  | 3.76250100  |
| C  | 9.48841900  | 10.81665200 | -2.59456800 | C | 11.09472300 | 7.50463500  | 3.67330100  |
| H  | 7.16775300  | 13.33043300 | -1.09591300 | C | 13.07405900 | 8.03873100  | 4.93929900  |
| H  | 6.44827200  | 11.76368700 | -1.72464200 | H | 13.24538700 | 6.03599200  | 4.06333200  |
| H  | 5.94119800  | 11.02431300 | 0.59204400  | H | 14.25875500 | 7.23085800  | 3.21651800  |
| H  | 7.62404500  | 13.48308500 | 1.39756200  | C | 11.56570600 | 8.36202200  | 4.84219800  |
| H  | 6.56308300  | 11.03873200 | 2.96527600  | H | 10.29569600 | 7.90618900  | 3.04268900  |
| H  | 6.21409400  | 12.71618300 | 3.37352300  | H | 10.79741000 | 6.49725500  | 4.01363700  |
| H  | 8.75007600  | 13.07368400 | 3.63790100  | H | 13.67338100 | 8.94940800  | 4.83381800  |
| H  | 7.90887100  | 12.16772400 | 4.88353600  | H | 13.34759100 | 7.57489300  | 5.89216900  |
| H  | 9.15133500  | 10.18654700 | 4.41041500  | H | 11.40757300 | 9.42458400  | 4.61763600  |
| H  | 10.48086000 | 9.84735200  | 2.45521800  | H | 11.01915500 | 8.13426800  | 5.76320300  |
| H  | 10.89644000 | 11.45472000 | 0.80513300  | O | 12.06361600 | 5.07093100  | 1.02120900  |
| H  | 9.98358400  | 12.73532600 | 1.68116200  | C | 10.82425100 | 4.57847400  | 1.55897100  |
| H  | 11.97252100 | 13.77198400 | -2.67094500 | C | 12.54914100 | 4.18128700  | 0.00164100  |
| H  | 10.26997500 | 10.29497900 | -4.53117000 | C | 10.35211900 | 3.54212500  | 0.55923100  |
| C  | 8.62036300  | 9.77451200  | 0.12298200  | H | 11.02437900 | 4.12529800  | 2.54371300  |
| H  | 9.62435700  | 9.34616200  | 0.09685000  | H | 10.15628500 | 5.43828800  | 1.66408900  |
| F  | 10.37009800 | 7.38520400  | 0.79388000  | C | 11.67569500 | 2.94406900  | 0.09738500  |
| Mg | 12.21740700 | 7.24636500  | 0.71658200  | H | 12.42495100 | 4.68218200  | -0.97110300 |
| Br | 14.73375100 | 7.01225000  | 0.46427000  | H | 13.61728500 | 4.01112300  | 0.16976700  |
| O  | 12.46882200 | 9.43660300  | 0.61261700  | H | 9.84720600  | 4.04121200  | -0.28026600 |
| C  | 13.28407800 | 10.10959000 | 1.59238100  | H | 9.66008900  | 2.81292400  | 0.99151200  |
| C  | 12.70795800 | 10.01017700 | -0.68973500 | H | 11.61074400 | 2.40429500  | -0.85243500 |
| C  | 13.82945800 | 11.34098200 | 0.89264500  | H | 12.06385800 | 2.25145900  | 0.85578700  |
| H  | 12.65412900 | 10.33214500 | 2.46345800  | O | 11.98753400 | 7.00989400  | -1.46794600 |
| H  | 14.09800700 | 9.43259200  | 1.88849800  | C | 10.67364200 | 7.26280800  | -2.00691300 |
| C  | 13.96153600 | 10.84510500 | -0.54202300 | C | 12.95041100 | 6.91506000  | -2.53532900 |

|   |             |             |             |
|---|-------------|-------------|-------------|
| C | 10.79206600 | 6.94833400  | -3.48257600 |
| H | 9.95562100  | 6.66290500  | -1.44278000 |
| H | 10.42908600 | 8.32411200  | -1.84237300 |
| C | 12.21724300 | 7.40405200  | -3.77063500 |
| H | 13.83846300 | 7.49553600  | -2.26143800 |
| H | 13.26477400 | 5.86444800  | -2.63152100 |
| H | 10.03278600 | 7.46247400  | -4.08151100 |
| H | 10.69334300 | 5.86803300  | -3.65785200 |
| H | 12.25256400 | 8.50224600  | -3.82588800 |
| H | 12.63812900 | 7.00086500  | -4.69657200 |
| H | 11.89506800 | 12.17829700 | -4.57924200 |
| H | 8.01713700  | 9.45536900  | -0.73504800 |
| H | 8.13967500  | 9.51790600  | 1.07498200  |
| H | 10.53409200 | 13.44239700 | -0.71698000 |
| H | 8.78463900  | 9.98269900  | -2.60523700 |

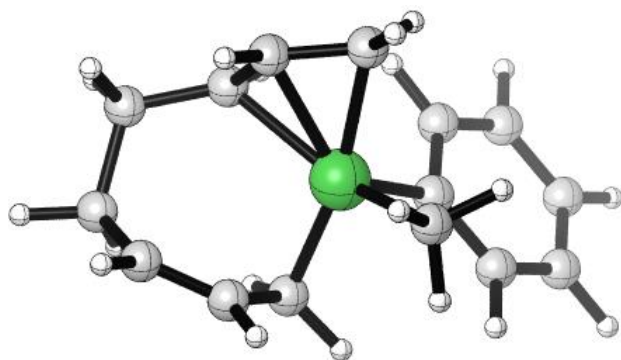

### INT12

|    |             |             |            |
|----|-------------|-------------|------------|
| Ni | 8.36219100  | 10.95160800 | 0.15327800 |
| C  | 6.68814000  | 9.86477100  | 0.48693300 |
| C  | 6.96418200  | 10.58964800 | 1.65976300 |
| C  | 7.17463500  | 11.96935400 | 1.69548000 |
| C  | 7.68686500  | 12.58500700 | 2.96191500 |
| C  | 9.21224500  | 12.88608300 | 3.00419200 |
| C  | 10.04693000 | 11.71673600 | 2.63402800 |
| C  | 10.35825400 | 11.41570200 | 1.34874200 |

|   |             |             |             |
|---|-------------|-------------|-------------|
| C | 9.88954500  | 12.15448700 | 0.19087700  |
| C | 8.03579900  | 11.66827000 | -1.58135600 |
| C | 6.79979200  | 12.30537700 | -1.73180200 |
| C | 6.41734300  | 12.85410800 | -2.95589000 |
| C | 7.25829400  | 12.77711800 | -4.05705400 |
| C | 8.48873500  | 12.14456800 | -3.91952500 |
| C | 8.86892100  | 11.59928100 | -2.69753500 |
| H | 6.03187700  | 10.26565300 | -0.28452600 |
| H | 6.71247000  | 8.77939200  | 0.54015200  |
| H | 7.33953300  | 10.02183100 | 2.51706200  |
| H | 6.63897500  | 12.62309600 | 1.00688300  |
| H | 7.46121400  | 11.91439200 | 3.80301700  |
| H | 7.16137700  | 13.52471500 | 3.17165200  |
| H | 9.42015500  | 13.72649600 | 2.32968800  |
| H | 9.45480300  | 13.22634900 | 4.01798800  |
| H | 10.39942200 | 11.06261900 | 3.43152500  |
| H | 10.98075200 | 10.53774200 | 1.16585300  |
| H | 10.49688300 | 12.04056000 | -0.70717700 |
| H | 9.61904000  | 13.19806200 | 0.35860200  |
| H | 6.09874000  | 12.38885700 | -0.90325300 |
| H | 5.44809500  | 13.34264900 | -3.03889100 |
| H | 6.95871900  | 13.20286200 | -5.01165400 |
| H | 9.16458500  | 12.07107100 | -4.76951000 |
| H | 9.84003800  | 11.11089100 | -2.63111700 |
| C | 9.06660900  | 9.38803200  | -0.71282000 |
| H | 9.20280000  | 8.65532100  | 0.09643400  |
| H | 8.45183200  | 8.94031400  | -1.49719300 |
| H | 10.04306800 | 9.66163000  | -1.12947800 |



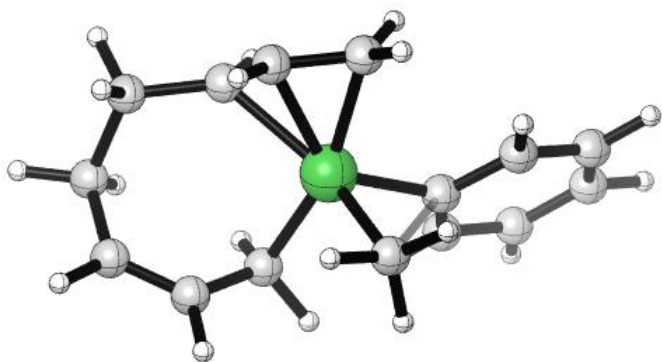

**TS13**

|    |             |             |             |
|----|-------------|-------------|-------------|
| Ni | 8.24608400  | 10.89953300 | 0.13421200  |
| C  | 6.33603200  | 10.18467000 | 0.38724300  |
| C  | 6.81828700  | 10.65698100 | 1.61092100  |
| C  | 7.34741200  | 11.94785900 | 1.72878800  |
| C  | 7.87651400  | 12.45573200 | 3.03205700  |
| C  | 9.31413600  | 13.02431100 | 3.04094700  |
| C  | 10.31508400 | 11.94420400 | 2.83288700  |
| C  | 10.55612900 | 11.41424600 | 1.62107500  |
| C  | 9.94770200  | 11.85626900 | 0.36553500  |
| C  | 8.17432200  | 10.85918200 | -1.76238800 |
| C  | 7.25278600  | 10.09860200 | -2.49467900 |
| C  | 6.95467500  | 10.39453800 | -3.81858500 |
| C  | 7.59092600  | 11.45141400 | -4.46113000 |
| C  | 8.53046400  | 12.19549400 | -3.76220700 |
| C  | 8.83393600  | 11.89496800 | -2.43469400 |
| H  | 5.77602200  | 10.85450300 | -0.26546100 |
| H  | 6.08907900  | 9.12972200  | 0.28627000  |
| H  | 7.07324700  | 9.94093700  | 2.39878200  |
| H  | 6.96286400  | 12.71140100 | 1.03829800  |
| H  | 7.83202500  | 11.64501600 | 3.77396900  |
| H  | 7.19600400  | 13.23951100 | 3.39454100  |
| H  | 9.39549300  | 13.80174900 | 2.26716000  |
| H  | 9.47304600  | 13.52516300 | 4.00342300  |
| H  | 10.79611400 | 11.51885100 | 3.71332400  |
| H  | 11.24360700 | 10.56620900 | 1.55898700  |
| H  | 10.58505700 | 11.60237600 | -0.48783300 |

|   |             |             |             |
|---|-------------|-------------|-------------|
| H | 9.73833800  | 12.93429600 | 0.35615000  |
| H | 6.74910300  | 9.25535500  | -2.02806600 |
| H | 6.22334000  | 9.78893600  | -4.34986900 |
| H | 7.36294000  | 11.68413200 | -5.49859300 |
| H | 9.04366100  | 13.02333500 | -4.24760700 |
| H | 9.58197700  | 12.50301300 | -1.93642900 |
| C | 9.11014500  | 9.29445800  | -0.45553800 |
| H | 9.31526400  | 9.04982300  | 0.60182100  |
| H | 8.49686300  | 8.51483100  | -0.90774600 |
| H | 10.05316700 | 9.40420000  | -0.99470700 |

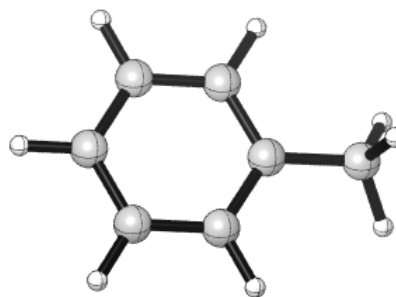

**P14**

|   |             |             |             |
|---|-------------|-------------|-------------|
| C | -2.47619900 | -0.74985400 | -0.08564100 |
| C | -3.29727400 | -1.82215600 | -0.43962800 |
| C | -4.16023300 | -2.39684400 | 0.48587400  |
| C | -4.21500600 | -1.90887800 | 1.78736500  |
| C | -3.39937100 | -0.84389000 | 2.15420700  |
| C | -2.53784700 | -0.27299100 | 1.22438700  |
| H | -3.25491000 | -2.21029900 | -1.45699000 |
| H | -4.78961700 | -3.23366900 | 0.19090300  |
| H | -4.88788900 | -2.35928000 | 2.51319900  |
| H | -3.43032800 | -0.45816600 | 3.17084100  |
| H | -1.89799200 | 0.55920200  | 1.51661200  |
| C | -1.56894400 | -0.11118200 | -1.09461900 |
| H | -1.18995700 | -0.84258400 | -1.81684600 |
| H | -0.70843600 | 0.36756100  | -0.61495500 |

H -2.09306200 0.66498800 -1.66709200

**Table 8**

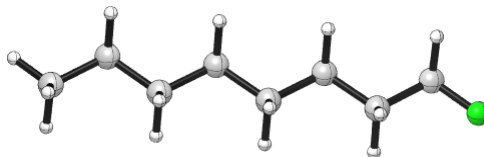

***n*-Oct-F**

|   |             |             |             |
|---|-------------|-------------|-------------|
| C | -1.19723300 | 0.56006600  | 0.02857400  |
| H | -0.83322800 | 1.09652300  | -0.85945000 |
| H | -2.29501300 | 0.60660800  | -0.00858700 |
| C | -0.71972500 | 1.28450000  | 1.26134900  |
| H | 0.37954800  | 1.27520200  | 1.31779200  |
| H | -1.10405300 | 0.80137800  | 2.17283800  |
| F | -1.14818700 | 2.59160800  | 1.24220100  |
| C | -0.72996100 | -0.88590300 | -0.00311500 |
| H | -1.07741600 | -1.40866300 | 0.90301200  |
| H | 0.37106800  | -0.91916000 | 0.03752700  |
| C | -1.21015000 | -1.64031000 | -1.23227400 |
| H | -2.31148300 | -1.62210400 | -1.26522700 |
| H | -0.87657600 | -1.11027300 | -2.13910200 |
| C | -0.72494300 | -3.07969800 | -1.27963100 |
| H | -1.04897800 | -3.60655800 | -0.36705000 |
| H | 0.37709100  | -3.09430800 | -1.25541200 |
| C | -1.21307000 | -3.84088300 | -2.50109900 |
| H | -0.90112200 | -3.30768300 | -3.41429900 |
| H | -2.31534000 | -3.83879100 | -2.51873800 |
| C | -0.71081600 | -5.27511100 | -2.55823000 |
| H | -1.01711200 | -5.80241500 | -1.64189000 |
| H | 0.38968300  | -5.27244300 | -2.54684300 |
| C | -1.21405600 | -6.02515200 | -3.77935600 |
| H | -0.90068000 | -5.52554200 | -4.70460700 |
| H | -0.83920400 | -7.05348700 | -3.81389100 |
| H | -2.31024200 | -6.07070900 | -3.78953000 |

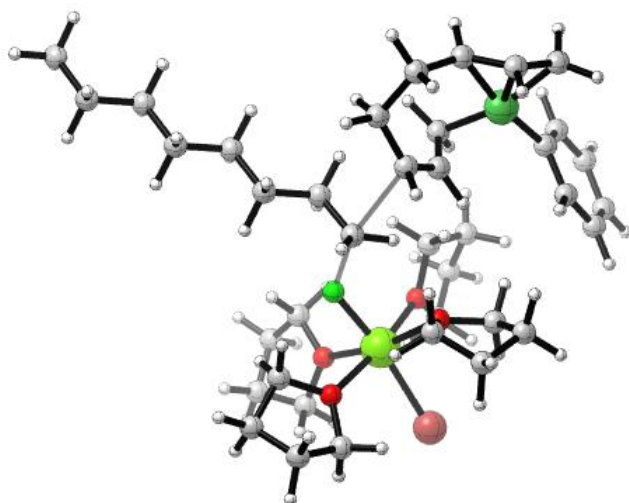

**TS3-Ph-*n*-Oct**

|    |             |             |             |
|----|-------------|-------------|-------------|
| Ni | 8.46359200  | 10.97819800 | -0.52806900 |
| C  | 7.35924400  | 9.42395000  | -0.10894300 |
| C  | 7.82881200  | 10.03108800 | 1.07759400  |
| C  | 7.66632600  | 11.40975800 | 1.30535800  |
| C  | 8.39266200  | 12.07709300 | 2.43935500  |
| C  | 9.45708100  | 13.14258500 | 2.05303700  |
| C  | 10.50032700 | 12.60199900 | 1.13334000  |
| C  | 10.17495500 | 12.32319100 | -0.19040500 |
| C  | 9.05854500  | 12.80881600 | -0.92679800 |
| C  | 8.98460900  | 10.36525300 | -2.24664500 |
| C  | 8.27780400  | 10.62562800 | -3.43465200 |
| C  | 8.74998300  | 10.25139700 | -4.69073500 |
| C  | 9.97591300  | 9.60075400  | -4.81839800 |
| C  | 10.70536400 | 9.32305400  | -3.66594900 |
| C  | 10.21085200 | 9.69722200  | -2.41576300 |
| H  | 6.38305100  | 9.70295900  | -0.51600700 |
| H  | 7.65520800  | 8.40037400  | -0.32657300 |
| H  | 8.60451200  | 9.51877400  | 1.65678300  |
| H  | 6.73648000  | 11.88807500 | 0.97763300  |
| H  | 8.91515200  | 11.30402600 | 3.02455900  |
| H  | 7.67324800  | 12.54586100 | 3.12754000  |
| H  | 8.94077600  | 14.00503800 | 1.59506800  |
| H  | 9.90587000  | 13.51777800 | 2.98423200  |
| H  | 11.29508100 | 12.00624600 | 1.59392400  |
| H  | 10.92997700 | 11.77213600 | -0.76724900 |
| H  | 9.17354100  | 12.95220400 | -2.00312500 |
| H  | 8.41039700  | 13.54722500 | -0.44842800 |
| H  | 7.31764400  | 11.14416200 | -3.37555600 |
| H  | 8.15860700  | 10.47189400 | -5.57976400 |
| H  | 10.34735200 | 9.30099100  | -5.79679800 |
| H  | 11.66227600 | 8.80205800  | -3.73764500 |
| H  | 10.80399800 | 9.43592700  | -1.53205400 |
| C  | 12.06123800 | 14.37203200 | -0.04309000 |
| H  | 12.61885400 | 14.17320700 | 0.86881700  |
| H  | 11.98440800 | 13.54654300 | -0.72712400 |
| F  | 13.36115300 | 15.11183000 | -0.94294400 |
| Mg | 14.47427400 | 14.20737700 | -2.29268500 |
| Br | 16.21328100 | 13.17554500 | -3.75999300 |
| O  | 14.69300600 | 16.16295000 | -3.07978600 |
| C  | 15.90718400 | 16.74163600 | -3.58615800 |
| C  | 13.61105700 | 17.10528200 | -3.14825100 |
| C  | 15.62023600 | 18.22877400 | -3.64725200 |
| H  | 16.72157600 | 16.45063000 | -2.91241400 |
| H  | 16.11621700 | 16.31830900 | -4.57892200 |
| C  | 14.13910500 | 18.23429000 | -4.01092100 |
| H  | 12.73559300 | 16.58538300 | -3.55833100 |
| H  | 13.36674500 | 17.43711500 | -2.12818000 |
| H  | 16.25373000 | 18.75187200 | -4.36888400 |
| H  | 15.76991300 | 18.69090600 | -2.66139900 |
| H  | 14.01157100 | 17.99281200 | -5.07479500 |
| H  | 13.63795100 | 19.18638200 | -3.81512300 |
| O  | 16.04117700 | 14.72382200 | -0.85513000 |
| C  | 17.37156200 | 14.17812100 | -0.74535000 |
| C  | 15.85874600 | 15.78494000 | 0.09934300  |
| C  | 17.88537800 | 14.69165000 | 0.58359000  |
| H  | 17.30339800 | 13.08850700 | -0.82366100 |
| H  | 17.97270100 | 14.53518300 | -1.59237900 |
| C  | 17.24521100 | 16.07281900 | 0.63931200  |

|   |             |             |             |
|---|-------------|-------------|-------------|
| H | 15.38309500 | 16.62859200 | -0.41360100 |
| H | 15.17316000 | 15.43540000 | 0.88559900  |
| H | 18.97747100 | 14.70566900 | 0.63615800  |
| H | 17.51037600 | 14.06714100 | 1.40634300  |
| H | 17.78037800 | 16.76312500 | -0.02736900 |
| H | 17.22395000 | 16.51462400 | 1.63960800  |
| O | 13.81473500 | 12.32777600 | -1.51164600 |
| C | 13.60348600 | 11.18062400 | -2.38492200 |
| C | 14.37379100 | 11.88764800 | -0.26286100 |
| C | 13.98478400 | 9.97042600  | -1.55257200 |
| H | 12.55187300 | 11.16783900 | -2.70044900 |
| H | 14.26036000 | 11.31436000 | -3.25318400 |
| C | 15.00498200 | 10.54969500 | -0.57829800 |
| H | 15.07435300 | 12.66057600 | 0.08373500  |
| H | 13.56208100 | 11.78784200 | 0.47620700  |
| H | 14.38223000 | 9.15903100  | -2.16874400 |
| H | 13.10978900 | 9.58749300  | -1.00857700 |
| H | 15.96908000 | 10.70002200 | -1.08266200 |
| H | 15.16286900 | 9.93422200  | 0.31195600  |
| O | 12.86120800 | 14.00857100 | -3.66941600 |
| C | 11.47182500 | 13.75576700 | -3.36984700 |
| C | 13.06701900 | 14.00213800 | -5.09855600 |
| C | 10.85243800 | 13.32495500 | -4.68198400 |
| H | 11.40319000 | 12.98653000 | -2.59328800 |
| H | 11.02772800 | 14.68589800 | -2.97845000 |
| C | 11.67629300 | 14.12231800 | -5.68649500 |
| H | 13.75149900 | 14.82576000 | -5.33609600 |
| H | 13.55494500 | 13.05997400 | -5.38266900 |
| H | 9.77713400  | 13.52253200 | -4.71814900 |
| H | 10.98994600 | 12.24348200 | -4.82737400 |
| H | 11.35300200 | 15.17305100 | -5.70109600 |
| H | 11.62099200 | 13.73450900 | -6.70750100 |
| C | 11.06334600 | 15.47002800 | -0.04650600 |
| H | 11.11132700 | 15.96991600 | -1.02660600 |
| H | 10.05467700 | 15.03197200 | 0.00765000  |

|   |             |             |            |
|---|-------------|-------------|------------|
| C | 11.29090400 | 16.47671100 | 1.06784500 |
| H | 11.30196500 | 15.94312000 | 2.03237700 |
| H | 12.29319200 | 16.92330100 | 0.95111700 |
| C | 10.23835300 | 17.57051800 | 1.11107300 |
| H | 10.20632800 | 18.09288600 | 0.14037500 |
| H | 9.24460200  | 17.10977800 | 1.23524800 |
| C | 10.47230000 | 18.57952800 | 2.22286700 |
| H | 11.46414600 | 19.04393700 | 2.09336000 |
| H | 10.51558700 | 18.05156400 | 3.18954300 |
| C | 9.41059000  | 19.66489000 | 2.28931500 |
| H | 8.41987200  | 19.20018300 | 2.42164800 |
| H | 9.36318600  | 20.19355700 | 1.32277400 |
| C | 9.64790600  | 20.67174000 | 3.40390300 |
| H | 10.63704600 | 21.13545200 | 3.26786400 |
| H | 9.69792400  | 20.13929200 | 4.36586700 |
| C | 8.57548000  | 21.74570800 | 3.46238100 |
| H | 7.58469800  | 21.30305500 | 3.62423300 |
| H | 8.75448300  | 22.46338800 | 4.26988900 |
| H | 8.53002700  | 22.30863600 | 2.52153700 |

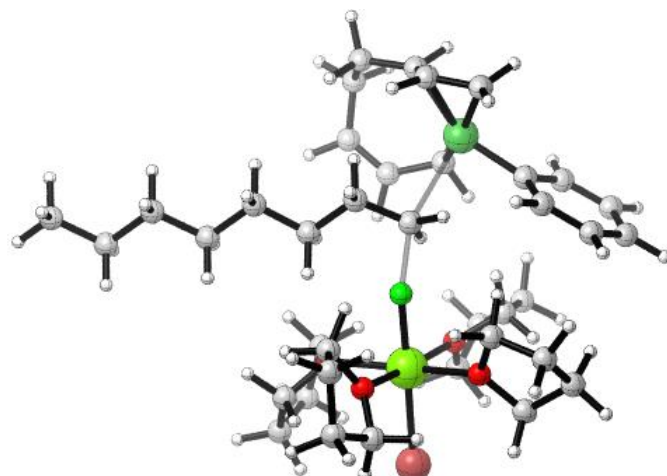

**TS10-Ph-n-Oct**

|    |            |             |             |
|----|------------|-------------|-------------|
| Ni | 8.39532400 | 11.86274200 | 0.10011200  |
| C  | 6.73306500 | 11.56678500 | -0.93909300 |

|    |             |             |             |   |             |             |             |
|----|-------------|-------------|-------------|---|-------------|-------------|-------------|
| C  | 6.43953900  | 11.56103900 | 0.43856800  | C | 14.04426800 | 11.51265000 | 0.80733900  |
| C  | 6.88639400  | 12.61223000 | 1.25036000  | H | 14.51226600 | 9.64208500  | 1.90664500  |
| C  | 6.68638600  | 12.65265800 | 2.73100600  | H | 15.07507800 | 9.68435100  | 0.22172100  |
| C  | 7.81490700  | 13.36993500 | 3.49525700  | C | 13.29640000 | 11.61253300 | -0.52330100 |
| C  | 9.05830700  | 12.55112000 | 3.64164200  | H | 12.98616100 | 9.71242300  | -1.57344400 |
| C  | 9.89984200  | 12.26908700 | 2.63177900  | H | 11.54074200 | 10.28049100 | -0.71168900 |
| C  | 9.79263200  | 12.67115100 | 1.22340600  | H | 14.96606800 | 12.10087800 | 0.83479700  |
| C  | 9.45561100  | 11.62895300 | -1.47674100 | H | 13.40161200 | 11.83839100 | 1.63782500  |
| C  | 10.27231000 | 12.68935100 | -1.91424400 | H | 13.99135500 | 11.79275900 | -1.35155100 |
| C  | 11.03882500 | 12.62893200 | -3.07796400 | H | 12.55589300 | 12.41792800 | -0.53916200 |
| C  | 11.02839500 | 11.48487600 | -3.86976800 | O | 12.26232100 | 7.50794600  | 3.00368000  |
| C  | 10.20824700 | 10.42514000 | -3.49313200 | C | 12.57881300 | 6.37372400  | 3.81863200  |
| C  | 9.43895500  | 10.51240200 | -2.33401900 | C | 12.69301000 | 8.63840000  | 3.76360000  |
| H  | 6.65479200  | 12.49716500 | -1.50670700 | C | 13.92819100 | 6.69086100  | 4.45780800  |
| H  | 6.52554500  | 10.67407600 | -1.52640800 | H | 11.78237000 | 6.27079600  | 4.57577300  |
| H  | 6.14765800  | 10.62327900 | 0.92245900  | H | 12.57856000 | 5.48932500  | 3.17529700  |
| H  | 6.93416200  | 13.60928800 | 0.78799900  | C | 14.03729300 | 8.22463800  | 4.35002400  |
| H  | 6.56297600  | 11.63189000 | 3.12990500  | H | 12.71411900 | 9.50585000  | 3.09217600  |
| H  | 5.74086700  | 13.17479200 | 2.94801700  | H | 11.94966700 | 8.83326400  | 4.55450400  |
| H  | 8.03202200  | 14.31095400 | 2.96282300  | H | 14.73199600 | 6.21580500  | 3.88657400  |
| H  | 7.44291900  | 13.66160200 | 4.48558600  | H | 13.97227400 | 6.33626900  | 5.49224300  |
| H  | 9.27310500  | 12.14248600 | 4.63130100  | H | 14.85490200 | 8.48555100  | 3.66876400  |
| H  | 10.75439600 | 11.62678800 | 2.88509500  | H | 14.22554400 | 8.71338500  | 5.31072900  |
| H  | 10.77277700 | 12.57474600 | 0.73478500  | O | 11.44097000 | 5.48432300  | 1.02578700  |
| H  | 9.48698900  | 13.73058500 | 1.14754900  | C | 10.10785600 | 5.22079400  | 1.49221600  |
| H  | 11.65753900 | 13.48028600 | -3.36136800 | C | 12.01597500 | 4.30088200  | 0.43798800  |
| H  | 10.14911900 | 9.53301100  | -4.12002500 | C | 9.71152900  | 3.92078900  | 0.82049900  |
| C  | 9.48108200  | 9.64827600  | 0.89137000  | H | 10.12905400 | 5.11808100  | 2.59049300  |
| H  | 10.37570200 | 10.23509400 | 1.05760800  | H | 9.49420500  | 6.08908000  | 1.23633800  |
| F  | 10.48983900 | 8.06324300  | 0.77416400  | C | 11.04507900 | 3.18429500  | 0.77224400  |
| Mg | 12.31979700 | 7.45611400  | 0.82869200  | H | 12.11039800 | 4.47673600  | -0.64530200 |
| Br | 14.66692500 | 6.56892500  | 0.89645300  | H | 13.02508000 | 4.16798600  | 0.84329300  |
| O  | 13.02380500 | 9.47685400  | 0.49119100  | H | 9.34419100  | 4.11326000  | -0.19676500 |
| C  | 14.28315400 | 10.02407500 | 0.90835400  | H | 8.92986800  | 3.38410700  | 1.36594300  |
| C  | 12.63369900 | 10.23846400 | -0.67460600 | H | 11.07513600 | 2.36947900  | 0.04334700  |

|   |             |             |             |
|---|-------------|-------------|-------------|
| H | 11.27850300 | 2.76358500  | 1.75950700  |
| O | 12.16032000 | 7.14288200  | -1.26891300 |
| C | 10.88958400 | 7.01558000  | -1.93296700 |
| C | 13.23245000 | 7.11817900  | -2.22841700 |
| C | 11.23002300 | 6.66210600  | -3.36814100 |
| H | 10.30480700 | 6.25374100  | -1.40334800 |
| H | 10.36203000 | 7.97627500  | -1.86246600 |
| C | 12.55511500 | 7.39168000  | -3.55485900 |
| H | 13.97811600 | 7.86154200  | -1.92432800 |
| H | 13.71229000 | 6.12901800  | -2.19904200 |
| H | 10.45091500 | 6.97650600  | -4.06973100 |
| H | 11.37346900 | 5.57823100  | -3.47895900 |
| H | 12.37025200 | 8.46962000  | -3.67699000 |
| H | 13.13966300 | 7.03891200  | -4.40926300 |
| H | 10.32935600 | 13.60157600 | -1.31584400 |
| H | 9.16896600  | 9.49993500  | -0.13118400 |
| C | 8.58346700  | 9.30455300  | 2.01678500  |
| H | 7.83161500  | 8.57777600  | 1.67409200  |
| H | 8.03725100  | 10.22518800 | 2.27975800  |
| C | 9.26876200  | 8.81976700  | 3.28497100  |
| H | 10.00055500 | 9.58215500  | 3.59578200  |
| H | 9.83911000  | 7.90409000  | 3.08320800  |
| C | 8.27942900  | 8.58353300  | 4.41176300  |
| H | 7.74667800  | 9.52118800  | 4.64041600  |
| H | 7.50670400  | 7.86956300  | 4.08032200  |
| C | 8.94239800  | 8.05469400  | 5.67207300  |
| H | 9.51351200  | 7.14173600  | 5.42471200  |
| H | 9.68673200  | 8.78723900  | 6.02865900  |
| C | 7.96045300  | 7.74694000  | 6.79039500  |
| H | 7.38589900  | 8.65568900  | 7.03319200  |
| H | 7.21851600  | 7.01446300  | 6.43156800  |
| C | 8.62289600  | 7.21596300  | 8.05168800  |
| H | 9.20542000  | 6.31564800  | 7.80213400  |
| H | 9.35428100  | 7.95402800  | 8.41464900  |
| C | 7.62157000  | 6.89641200  | 9.14826500  |

|   |             |             |             |
|---|-------------|-------------|-------------|
| H | 8.10786600  | 6.51635300  | 10.05280300 |
| H | 7.04754100  | 7.78834100  | 9.42897900  |
| H | 6.90166900  | 6.13875900  | 8.81401100  |
| H | 8.78565800  | 9.66320900  | -2.10580100 |
| H | 11.62837600 | 11.42901100 | -4.77623100 |

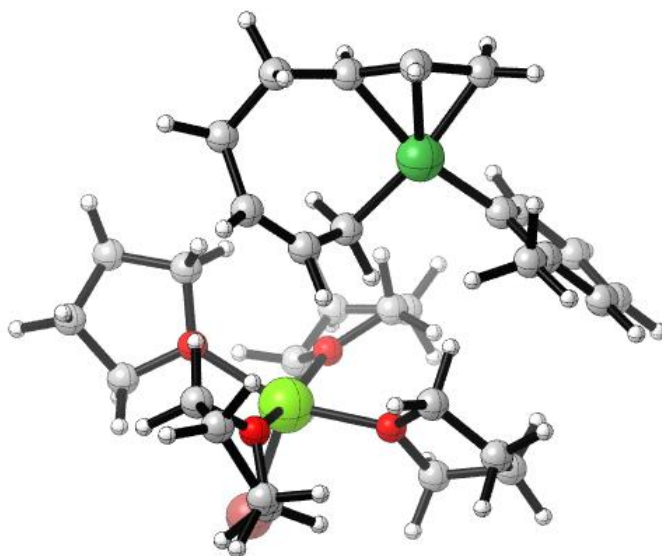

#### **INT1-2-methylphenyl**

|    |             |             |             |
|----|-------------|-------------|-------------|
| Ni | 9.44887300  | 12.74459800 | -0.67412600 |
| C  | 7.52519000  | 12.61352200 | -0.32531600 |
| C  | 8.27125400  | 12.26775200 | 0.82320700  |
| C  | 9.25867300  | 13.13515900 | 1.31948800  |
| C  | 10.13184300 | 12.74910400 | 2.47226400  |
| C  | 11.63495400 | 13.03607300 | 2.26679800  |
| C  | 12.24291100 | 12.08613700 | 1.28718000  |
| C  | 12.04769500 | 12.16722200 | -0.05086300 |
| C  | 11.36014500 | 13.21160900 | -0.79895900 |
| C  | 9.16386100  | 12.67743900 | -2.54947600 |
| C  | 8.96194600  | 13.86337400 | -3.28751800 |
| C  | 8.85775400  | 13.85303600 | -4.68107300 |
| C  | 8.88799200  | 12.65341500 | -5.38605200 |
| C  | 9.01375400  | 11.46399900 | -4.67417500 |

|    |             |             |             |   |             |             |             |
|----|-------------|-------------|-------------|---|-------------|-------------|-------------|
| C  | 9.15910800  | 11.47225900 | -3.28327800 | H | 16.95025200 | 13.88956100 | -0.56801500 |
| H  | 7.14719800  | 13.63330500 | -0.43844900 | H | 16.76385300 | 15.63293800 | -0.83252900 |
| H  | 6.88573400  | 11.85706800 | -0.77646400 | C | 14.90912000 | 15.81309400 | 1.23426200  |
| H  | 8.30904100  | 11.22054700 | 1.14359100  | H | 13.34811800 | 15.72302100 | -0.32607500 |
| H  | 9.07996400  | 14.21668700 | 1.23204000  | H | 13.51603700 | 14.23397300 | 0.65561700  |
| H  | 10.01532100 | 11.67397800 | 2.68044100  | H | 17.06670100 | 15.54687500 | 1.60877200  |
| H  | 9.80302000  | 13.27744100 | 3.38126400  | H | 16.09041400 | 14.06479200 | 1.72227300  |
| H  | 11.73553900 | 14.08602700 | 1.94006300  | H | 15.09050300 | 16.85083000 | 0.92426700  |
| H  | 12.14822500 | 12.96650000 | 3.23621600  | H | 14.43796500 | 15.82906800 | 2.22135800  |
| H  | 12.68798200 | 11.17718700 | 1.69844600  | O | 15.09810400 | 11.76025400 | -1.69379000 |
| H  | 12.40741900 | 11.31758700 | -0.64775600 | C | 15.85049900 | 10.81944900 | -2.47853900 |
| H  | 11.70370000 | 13.26419100 | -1.84264800 | C | 15.35930800 | 11.39941300 | -0.33115200 |
| H  | 11.44026000 | 14.20460400 | -0.32944500 | C | 15.63719800 | 9.48331200  | -1.77419700 |
| H  | 8.72282000  | 14.79671700 | -5.21516100 | H | 15.48312900 | 10.87388300 | -3.50817900 |
| H  | 8.78228900  | 12.64270500 | -6.46976400 | H | 16.90498300 | 11.13318800 | -2.47426700 |
| H  | 8.99380900  | 10.50919700 | -5.20548900 | C | 15.25940100 | 9.88007000  | -0.33137800 |
| Mg | 14.55329100 | 13.60263900 | -2.54078900 | H | 16.37628800 | 11.73635300 | -0.06762600 |
| Br | 16.62061900 | 14.06090400 | -3.76424200 | H | 14.61634800 | 11.90190000 | 0.29849700  |
| O  | 13.43891800 | 15.27677400 | -3.07213000 | H | 16.53863700 | 8.86516100  | -1.82018500 |
| C  | 14.10299700 | 16.54437700 | -3.27631200 | H | 14.82822100 | 8.91570700  | -2.24660600 |
| C  | 12.04564800 | 15.37661300 | -3.45875300 | H | 15.91535500 | 9.43150400  | 0.42015600  |
| C  | 12.97808100 | 17.53565100 | -3.48650800 | H | 14.23353500 | 9.57131400  | -0.10135500 |
| H  | 14.73938300 | 16.73413100 | -2.40295300 | O | 13.44391300 | 12.52256100 | -3.90598600 |
| H  | 14.75092500 | 16.45990100 | -4.15961300 | C | 12.51717900 | 11.42421700 | -3.69125100 |
| C  | 11.95696300 | 16.67723800 | -4.22501900 | C | 13.60178500 | 12.76507700 | -5.32532100 |
| H  | 11.77314100 | 14.48145500 | -4.02864000 | C | 12.37113300 | 10.77532600 | -5.04829500 |
| H  | 11.43529100 | 15.39479100 | -2.54705700 | H | 12.93897500 | 10.77936500 | -2.91044600 |
| H  | 13.30091000 | 18.41900300 | -4.04452400 | H | 11.56045900 | 11.83914100 | -3.34319900 |
| H  | 12.56799200 | 17.86739700 | -2.52298300 | C | 12.47871800 | 11.98344200 | -5.97274000 |
| H  | 12.26611600 | 16.53347000 | -5.26927300 | H | 13.57445300 | 13.85050700 | -5.48438600 |
| H  | 10.94407600 | 17.08962300 | -4.22194700 | H | 14.59321100 | 12.40197300 | -5.63184800 |
| O  | 14.99780600 | 14.54351400 | -0.74795900 | H | 11.41415200 | 10.25188500 | -5.13905900 |
| C  | 16.35133700 | 14.76544800 | -0.29741000 | H | 13.18711300 | 10.06337500 | -5.23767800 |
| C  | 14.05647500 | 15.08293500 | 0.21501700  | H | 11.53367500 | 12.54616900 | -5.94428300 |
| C  | 16.20816400 | 15.01702400 | 1.18696200  | H | 12.70103500 | 11.72516000 | -7.01203400 |

|   |             |             |             |
|---|-------------|-------------|-------------|
| C | 9.32689200  | 10.16927500 | -2.55158700 |
| H | 10.27964600 | 10.13709900 | -2.00036600 |
| H | 8.54192000  | 10.03489000 | -1.79511600 |
| H | 9.29552600  | 9.30406200  | -3.22742700 |
| H | 8.83640017  | 14.78764312 | -2.76324246 |

|   |             |             |             |
|---|-------------|-------------|-------------|
| H | 6.36242300  | 10.17133300 | -0.36679100 |
| H | 7.45707300  | 8.80862200  | 0.16969800  |
| H | 8.34695700  | 10.16620100 | 2.03173800  |
| H | 6.78335400  | 12.53348200 | 0.80024700  |
| H | 8.76264700  | 12.12834500 | 3.08864300  |
| H | 7.60822400  | 13.44511100 | 2.91149900  |
| H | 9.08145700  | 14.55178400 | 1.25293700  |
| H | 9.89813600  | 14.25678600 | 2.78173500  |
| H | 11.28425800 | 12.45020500 | 1.76931900  |
| H | 11.07963900 | 11.90334300 | -0.57578300 |
| H | 9.42344400  | 12.90475900 | -2.06734100 |
| H | 8.65019000  | 13.80964900 | -0.67337300 |
| H | 9.19564600  | 10.33504600 | -5.30984300 |
| H | 11.52587100 | 7.87740300  | -2.67222900 |
| C | 12.20626400 | 14.49567600 | -0.07426600 |
| H | 12.39404200 | 15.03409800 | 0.84895400  |
| H | 12.61056600 | 13.50275100 | -0.16098900 |
| H | 11.27572200 | 14.70535300 | -0.58630700 |
| F | 13.24603600 | 15.24410000 | -1.13163000 |

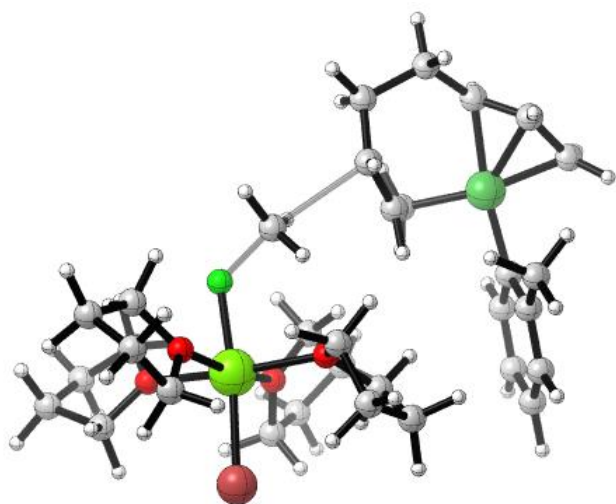

### TS3-2-methylphenyl-Me

|    |             |             |             |
|----|-------------|-------------|-------------|
| Ni | 8.54804400  | 11.24685200 | -0.35723600 |
| C  | 7.25876600  | 9.87839800  | 0.18665900  |
| C  | 7.67573200  | 10.63567900 | 1.30360100  |
| C  | 7.63367500  | 12.04200600 | 1.28604300  |
| C  | 8.33454900  | 12.83164600 | 2.35682400  |
| C  | 9.49446600  | 13.75293500 | 1.89169000  |
| C  | 10.56793000 | 13.01309700 | 1.16127900  |
| C  | 10.31277800 | 12.54669500 | -0.12573600 |
| C  | 9.26549300  | 12.96434500 | -0.99076400 |
| C  | 9.23175000  | 10.29985500 | -1.86834500 |
| C  | 8.90973600  | 10.64091900 | -3.19211800 |
| C  | 9.49528500  | 10.03599000 | -4.30470700 |
| C  | 10.45074800 | 9.04217200  | -4.12576900 |
| C  | 10.79110300 | 8.67080600  | -2.82808900 |
| C  | 10.20751500 | 9.28589600  | -1.71583700 |

|    |             |             |             |
|----|-------------|-------------|-------------|
| Mg | 14.45815000 | 14.24424600 | -2.40842300 |
| Br | 16.16657500 | 13.16771900 | -3.86146100 |
| O  | 14.85134600 | 16.20364500 | -3.17592200 |
| C  | 16.10213800 | 16.65669800 | -3.72534700 |
| C  | 13.84036500 | 17.21477200 | -3.32784400 |
| C  | 15.92970500 | 18.15395000 | -3.87440200 |
| H  | 16.90307600 | 16.35290900 | -3.04139900 |
| H  | 16.26939300 | 16.15397400 | -4.68796500 |
| C  | 14.45535600 | 18.25007500 | -4.25004600 |
| H  | 12.93487800 | 16.73525700 | -3.71891000 |
| H  | 13.61017100 | 17.63031100 | -2.33685500 |
| H  | 16.60600200 | 18.58465700 | -4.61788700 |
| H  | 16.10880800 | 18.65703400 | -2.91380900 |
| H  | 14.31449300 | 17.96213100 | -5.30051600 |
| H  | 14.02556300 | 19.24590700 | -4.11033700 |
| O  | 15.89094400 | 14.60341500 | -0.84604800 |





|    |             |             |             |   |             |             |             |
|----|-------------|-------------|-------------|---|-------------|-------------|-------------|
| C  | 9.97049100  | 12.66651000 | -1.81167700 | H | 14.00845100 | 11.80976200 | -1.30154400 |
| C  | 10.76956500 | 12.76365400 | -2.94950700 | H | 12.43554100 | 12.33477900 | -0.69676300 |
| C  | 10.87751400 | 11.67732500 | -3.80813200 | O | 11.55112900 | 7.49481100  | 2.87881800  |
| C  | 10.12602200 | 10.54064100 | -3.53152600 | C | 11.69720900 | 6.34499700  | 3.72607800  |
| C  | 9.29308200  | 10.45782100 | -2.40671800 | C | 11.86293800 | 8.62262000  | 3.70061800  |
| H  | 6.34493000  | 12.59471000 | -0.86864600 | C | 12.82955000 | 6.67321700  | 4.70335700  |
| H  | 6.17340200  | 10.87539400 | -1.45424100 | H | 10.74152100 | 6.18805100  | 4.24942600  |
| H  | 6.20544300  | 10.03436100 | 0.89909400  | H | 11.89583700 | 5.48380400  | 3.07956000  |
| H  | 6.84459500  | 12.98375700 | 1.56582400  | C | 13.07041300 | 8.18021000  | 4.50801300  |
| H  | 7.15987400  | 10.39792200 | 3.22452000  | H | 12.03084900 | 9.48079700  | 3.03996500  |
| H  | 6.00857700  | 11.67554300 | 3.60297700  | H | 10.99505500 | 8.85340100  | 4.33942100  |
| H  | 7.98760100  | 13.30533300 | 3.68274200  | H | 13.73183600 | 6.10525600  | 4.46017500  |
| H  | 7.78542000  | 12.18874100 | 5.02014400  | H | 12.53815200 | 6.43306300  | 5.73109900  |
| H  | 9.92638000  | 11.27504000 | 4.64175800  | H | 13.98563300 | 8.32997800  | 3.92300800  |
| H  | 11.13165800 | 11.30383100 | 2.64757000  | H | 13.16310200 | 8.72960100  | 5.44940800  |
| H  | 10.63094900 | 12.42987200 | 0.68096400  | O | 11.30024400 | 5.40241600  | 0.76737400  |
| H  | 9.27864600  | 13.30526700 | 1.43141700  | C | 9.90438700  | 5.07881900  | 0.88494800  |
| H  | 11.31627500 | 13.68378000 | -3.15442900 | C | 12.03991200 | 4.25403000  | 0.30278600  |
| H  | 10.16226300 | 9.69467600  | -4.22394100 | C | 9.71848300  | 3.86445700  | 0.00029700  |
| C  | 9.59246800  | 9.55252900  | 0.75655000  | H | 9.67946400  | 4.84325200  | 1.93807400  |
| H  | 10.43610200 | 10.10936900 | 0.38745000  | H | 9.33665200  | 5.96489000  | 0.59210200  |
| F  | 10.30644000 | 7.96918100  | 0.41147000  | C | 11.02904000 | 3.12166200  | 0.23234100  |
| Mg | 12.13108200 | 7.40786800  | 0.76549400  | H | 12.46064300 | 4.50952300  | -0.68129000 |
| Br | 14.42750700 | 6.62943500  | 1.35950600  | H | 12.87418600 | 4.07109200  | 0.98899900  |
| O  | 12.80722600 | 9.47114000  | 0.44442300  | H | 9.63002000  | 4.16889400  | -1.05147900 |
| C  | 13.96151400 | 10.05010000 | 1.07653700  | H | 8.83015400  | 3.28176900  | 0.26073800  |
| C  | 12.67288500 | 10.16908900 | -0.81367900 | H | 11.27025300 | 2.39666900  | -0.55015900 |
| C  | 13.77020100 | 11.53352800 | 0.85414700  | H | 10.99100700 | 2.58313800  | 1.18812600  |
| H  | 13.98014900 | 9.72259300  | 2.11955200  | O | 12.43873900 | 7.09656300  | -1.32632000 |
| H  | 14.87124800 | 9.66973400  | 0.58532900  | C | 11.35590500 | 7.04637500  | -2.27356700 |
| C  | 13.22019600 | 11.58146900 | -0.57605300 | C | 13.70494000 | 7.05221400  | -2.01681700 |
| H  | 13.25665600 | 9.63321200  | -1.57642300 | C | 11.99449800 | 6.60874300  | -3.57363400 |
| H  | 11.61901900 | 10.15366000 | -1.11471700 | H | 10.59153800 | 6.36127900  | -1.88660700 |
| H  | 14.69704700 | 12.10061600 | 0.98048800  | H | 10.91415800 | 8.04947200  | -2.35870100 |
| H  | 13.03145000 | 11.92630600 | 1.56525400  | C | 13.35646400 | 7.28445500  | -3.47413400 |

|   |             |             |             |   |             |             |             |
|---|-------------|-------------|-------------|---|-------------|-------------|-------------|
| H | 14.36657300 | 7.80515300  | -1.57434700 | C | 10.44413700 | 13.07354400 | 1.11491600  |
| H | 14.16296300 | 6.06726300  | -1.84914300 | C | 10.21467100 | 12.57239600 | -0.16207900 |
| H | 11.41128800 | 6.91479100  | -4.44747200 | C | 9.13049300  | 12.88573700 | -1.02651900 |
| H | 12.11058000 | 5.51629700  | -3.60066800 | C | 9.28871000  | 10.19579200 | -1.84285200 |
| H | 13.25283500 | 8.35938900  | -3.68043900 | C | 8.95950600  | 10.48379400 | -3.17735900 |
| H | 14.10752800 | 6.87514700  | -4.15548500 | C | 9.57069700  | 9.86454700  | -4.26811000 |
| H | 11.50667700 | 11.72196600 | -4.69520900 | C | 10.55650900 | 8.90819000  | -4.05512000 |
| C | 8.48691900  | 9.18880400  | -2.26355000 | C | 10.90812100 | 8.59312200  | -2.74556900 |
| H | 8.95670200  | 8.45671900  | -1.59091700 | C | 10.30443900 | 9.22780900  | -1.65572700 |
| H | 7.48631500  | 9.38727600  | -1.86531300 | H | 6.43043700  | 9.92601300  | -0.34861100 |
| H | 8.36278400  | 8.69070300  | -3.23369000 | H | 7.60654800  | 8.63670000  | 0.19702000  |
| H | 9.93660800  | 13.53482700 | -1.14943200 | H | 8.41743100  | 10.06046800 | 2.04381300  |
| H | 8.73426000  | 9.39459800  | 0.12232400  | H | 6.70813300  | 12.32080200 | 0.80507400  |
| H | 9.47921400  | 9.46906200  | 1.83354400  | H | 8.74248200  | 12.04857300 | 3.06763100  |

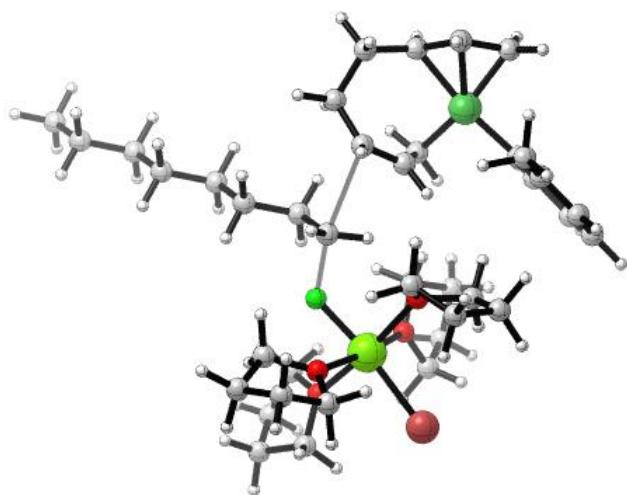

|    |             |             |             |    |             |             |             |
|----|-------------|-------------|-------------|----|-------------|-------------|-------------|
| H  | 7.49247500  | 13.27831400 | 2.91626200  | H  | 11.22344700 | 12.59272500 | 1.71461300  |
| H  | 8.83463200  | 14.49232300 | 1.23858300  | H  | 11.02018200 | 11.97000700 | -0.60133600 |
| H  | 9.70962100  | 14.26045500 | 2.74830000  | H  | 9.29717700  | 12.83106100 | -2.10328800 |
| H  | 11.22344700 | 12.59272500 | 1.71461300  | H  | 8.44493400  | 13.67930900 | -0.71907800 |
| H  | 11.02018200 | 11.97000700 | -0.60133600 | H  | 9.26635400  | 10.12196300 | -5.28319200 |
| H  | 9.29717700  | 12.83106100 | -2.10328800 | H  | 11.67027200 | 7.83195400  | -2.56269900 |
| H  | 8.44493400  | 13.67930900 | -0.71907800 | C  | 12.02217800 | 14.65263000 | -0.25411400 |
| H  | 9.26635400  | 10.12196300 | -5.28319200 | H  | 11.88642600 | 13.80423400 | -0.90133600 |
| H  | 11.67027200 | 7.83195400  | -2.56269900 | F  | 13.33752200 | 15.29103900 | -1.20327600 |
| C  | 12.02217800 | 14.65263000 | -0.25411400 | Mg | 14.40529100 | 14.24206900 | -2.50190400 |
| H  | 11.88642600 | 13.80423400 | -0.90133600 | Br | 16.03736100 | 13.04168900 | -3.95042800 |
| F  | 13.33752200 | 15.29103900 | -1.20327600 | O  | 14.84136600 | 16.16190300 | -3.29275200 |
| Mg | 14.40529100 | 14.24206900 | -2.50190400 | C  | 16.12931900 | 16.58421400 | -3.77324900 |
| Br | 16.03736100 | 13.04168900 | -3.95042800 | C  | 13.89986200 | 17.24503900 | -3.33643100 |
| O  | 14.84136600 | 16.16190300 | -3.29275200 | C  | 16.04374900 | 18.09704200 | -3.81237900 |
| C  | 16.12931900 | 16.58421400 | -3.77324900 | H  | 16.88711700 | 16.17590900 | -3.09410700 |
| C  | 13.89986200 | 17.24503900 | -3.33643100 | H  | 16.29412900 | 16.15016200 | -4.76941900 |
| C  | 16.04374900 | 18.09704200 | -3.81237900 | C  | 14.57772100 | 18.30809300 | -4.17853900 |
| H  | 16.88711700 | 16.17590900 | -3.09410700 |    |             |             |             |
| H  | 16.29412900 | 16.15016200 | -4.76941900 |    |             |             |             |
| C  | 14.57772100 | 18.30809300 | -4.17853900 |    |             |             |             |

### TS3-2-methylphenyl-*n*-Oct

|    |            |             |             |
|----|------------|-------------|-------------|
| Ni | 8.54333400 | 11.13320100 | -0.35658300 |
| C  | 7.34329600 | 9.69245900  | 0.20602000  |
| C  | 7.71802300 | 10.48336900 | 1.31361000  |
| C  | 7.59244600 | 11.88534600 | 1.28349500  |
| C  | 8.25139300 | 12.72067200 | 2.34644200  |
| C  | 9.32974500 | 13.72776800 | 1.86378500  |

|   |             |             |             |   |             |             |             |
|---|-------------|-------------|-------------|---|-------------|-------------|-------------|
| H | 12.96028300 | 16.85953000 | -3.75277600 | C | 10.75238500 | 13.68219300 | -4.91984400 |
| H | 13.70461700 | 17.58741900 | -2.30967000 | H | 11.25943100 | 13.34786200 | -2.81470200 |
| H | 16.74479000 | 18.54017900 | -4.52509100 | H | 10.99819400 | 15.05573700 | -3.24195100 |
| H | 16.25036600 | 18.52179900 | -2.82021900 | C | 11.61842100 | 14.43784400 | -5.92239600 |
| H | 14.42350500 | 18.10408400 | -5.24673100 | H | 13.72162700 | 15.04698100 | -5.55201000 |
| H | 14.20828700 | 19.31528700 | -3.96656300 | H | 13.45202800 | 13.29496300 | -5.63024900 |
| O | 15.93297500 | 14.55625200 | -0.98988400 | H | 9.68899800  | 13.93401100 | -4.96515100 |
| C | 17.18700600 | 13.86199100 | -0.82841000 | H | 10.84815400 | 12.59552800 | -5.05651200 |
| C | 15.86561900 | 15.67799800 | -0.08901800 | H | 11.34313900 | 15.50193400 | -5.93604500 |
| C | 17.72444600 | 14.35376700 | 0.49876100  | H | 11.54814800 | 14.05447200 | -6.94414300 |
| H | 16.99067900 | 12.78568100 | -0.86987400 | C | 10.77458800 | 8.88580000  | -0.26767900 |
| H | 17.84472100 | 14.11497900 | -1.67106500 | H | 11.20732500 | 9.76295500  | 0.24045200  |
| C | 17.26006100 | 15.80413900 | 0.49214300  | H | 9.94877300  | 8.54619300  | 0.37027900  |
| H | 15.53506900 | 16.55697600 | -0.65358000 | H | 11.53714400 | 8.09590600  | -0.27484000 |
| H | 15.10901500 | 15.46482400 | 0.67997000  | H | 11.03691300 | 8.40361400  | -4.89141300 |
| H | 18.80798800 | 14.23484100 | 0.58516400  | H | 8.18159600  | 11.22527000 | -3.37747200 |
| H | 17.25184900 | 13.80837800 | 1.32717700  | C | 11.06833100 | 15.78919700 | -0.30005300 |
| H | 17.89879300 | 16.40161100 | -0.17304300 | H | 10.04150000 | 15.39300300 | -0.28138700 |
| H | 17.26266300 | 16.27700000 | 1.47836500  | H | 11.17943400 | 16.27828200 | -1.28092400 |
| O | 13.51251500 | 12.43358400 | -1.76116100 | H | 12.59460300 | 14.47218500 | 0.65188400  |
| C | 13.11952700 | 11.34364600 | -2.63688500 | C | 11.29537700 | 16.79712100 | 0.81192400  |
| C | 14.04104400 | 11.83419300 | -0.57333400 | H | 11.21574200 | 16.27774100 | 1.78070200  |
| C | 13.99873200 | 10.15190400 | -2.25182600 | H | 12.33089000 | 17.17311800 | 0.74310800  |
| H | 12.05170200 | 11.12675500 | -2.47242000 | C | 10.31703500 | 17.95784300 | 0.77345100  |
| H | 13.26671800 | 11.69118800 | -3.66381800 | H | 10.38504500 | 18.46472400 | -0.20366400 |
| C | 14.85615500 | 10.66638000 | -1.08963300 | H | 9.28908200  | 17.56434400 | 0.83518200  |
| H | 14.61236100 | 12.60525000 | -0.04031800 | C | 10.53993900 | 18.96944800 | 1.88476000  |
| H | 13.20260200 | 11.50539500 | 0.06559400  | H | 11.57343600 | 19.35045100 | 1.83203200  |
| H | 14.61718000 | 9.81971300  | -3.09048700 | H | 10.45892800 | 18.46273100 | 2.86010900  |
| H | 13.36510400 | 9.31374800  | -1.94207500 | C | 9.56891300  | 20.13815500 | 1.83990600  |
| H | 15.81885200 | 11.03140900 | -1.47096100 | H | 8.53550600  | 19.75780300 | 1.88851000  |
| H | 15.04195200 | 9.90911200  | -0.32206000 | H | 9.65196300  | 20.64688500 | 0.86508600  |
| O | 12.78945500 | 14.23816600 | -3.90186100 | C | 9.78766000  | 21.14835700 | 2.95488100  |
| C | 11.38652500 | 14.09085700 | -3.60816100 | H | 10.82238700 | 21.52099500 | 2.90759900  |
| C | 13.00060400 | 14.25031900 | -5.32980100 | H | 9.69771500  | 20.63926200 | 3.92635800  |

|   |            |             |            |   |            |             |             |
|---|------------|-------------|------------|---|------------|-------------|-------------|
| C | 8.81456600 | 22.31293900 | 2.88863000 | H | 6.13710600 | 10.95125400 | -1.39997300 |
| H | 7.77733400 | 21.96297100 | 2.96247600 | H | 5.91873400 | 10.38584500 | 1.01998200  |
| H | 8.97950000 | 23.03497600 | 3.69522900 | H | 6.93421400 | 13.27040200 | 1.43368700  |
| H | 8.90906400 | 22.85056200 | 1.93668600 | H | 6.76328200 | 10.85934400 | 3.35352200  |

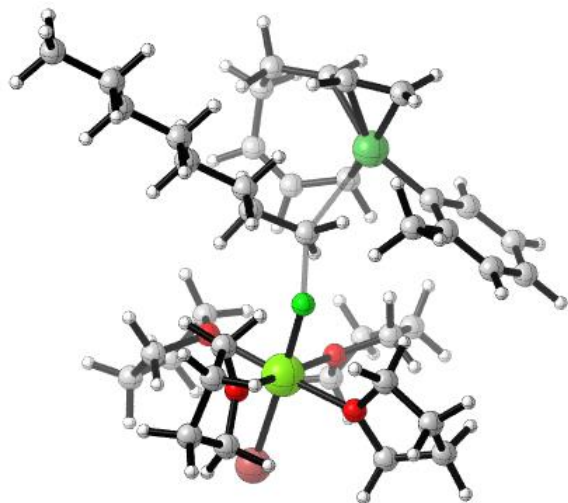

|    |             |             |             |    |             |             |             |
|----|-------------|-------------|-------------|----|-------------|-------------|-------------|
| H  | 5.80918100  | 12.32966600 | 3.52363400  | H  | 10.88301300 | 11.17022100 | 2.93320100  |
| H  | 7.99822200  | 13.64954500 | 3.58104400  | H  | 10.64924900 | 12.19190000 | 0.84598000  |
| H  | 7.57833300  | 12.70955800 | 5.00238100  | H  | 10.64924900 | 12.19190000 | 0.84598000  |
| H  | 9.57246900  | 11.46160300 | 4.82790200  | H  | 9.36328500  | 13.27153400 | 1.43311600  |
| H  | 10.88301300 | 11.17022100 | 2.93320100  | H  | 11.30716300 | 13.59807700 | -3.04655500 |
| H  | 10.64924900 | 12.19190000 | 0.84598000  | H  | 10.04198600 | 9.65638000  | -4.16542100 |
| H  | 9.36328500  | 13.27153400 | 1.43311600  | C  | 9.48799900  | 9.39618100  | 0.94581800  |
| H  | 11.30716300 | 13.59807700 | -3.04655500 | H  | 10.42209100 | 9.91393900  | 1.11359100  |
| H  | 10.04198600 | 9.65638000  | -4.16542100 | F  | 10.43751300 | 7.87909300  | 0.25091000  |
| C  | 9.48799900  | 9.39618100  | 0.94581800  | Mg | 12.22914900 | 7.32195000  | 0.64959700  |
| H  | 10.42209100 | 9.91393900  | 1.11359100  | Br | 14.53036200 | 6.51045600  | 1.23042900  |
| F  | 10.43751300 | 7.87909300  | 0.25091000  | O  | 12.88986600 | 9.37925600  | 0.45539300  |
| Mg | 12.22914900 | 7.32195000  | 0.64959700  | C  | 14.07898200 | 9.97073900  | 1.00002100  |
| Br | 14.53036200 | 6.51045600  | 1.23042900  | C  | 12.50864900 | 10.18093300 | -0.68903600 |
| O  | 12.88986600 | 9.37925600  | 0.45539300  | C  | 13.79501200 | 11.45167400 | 0.90186900  |
| C  | 14.07898200 | 9.97073900  | 1.00002100  | H  | 14.22429300 | 9.58007700  | 2.01140500  |
| C  | 12.50864900 | 10.18093300 | -0.68903600 | H  | 14.95029500 | 9.67379800  | 0.39442700  |
| C  | 13.79501200 | 11.45167400 | 0.90186900  | C  | 13.15808800 | 11.55258300 | -0.48383700 |
| H  | 14.22429300 | 9.58007700  | 2.01140500  | H  | 12.86742300 | 9.68669100  | -1.60238200 |
| H  | 14.95029500 | 9.67379800  | 0.39442700  | H  | 11.41479900 | 10.21630900 | -0.72955300 |
| C  | 13.15808800 | 11.55258300 | -0.48383700 | H  | 14.69035800 | 12.06955600 | 1.01573600  |
| H  | 12.86742300 | 9.68669100  | -1.60238200 | H  | 13.07412600 | 11.74333300 | 1.67939100  |
| H  | 11.41479900 | 10.21630900 | -0.72955300 | H  | 13.92082500 | 11.73296200 | -1.25041100 |
| H  | 14.69035800 | 12.06955600 | 1.01573600  | H  | 12.41938600 | 12.35633400 | -0.55977300 |
| H  | 13.07412600 | 11.74333300 | 1.67939100  | O  | 11.70760000 | 7.44595200  | 2.77289400  |
| H  | 13.92082500 | 11.73296200 | -1.25041100 | C  | 11.79100700 | 6.30323500  | 3.63428500  |
| H  | 12.41938600 | 12.35633400 | -0.55977300 | C  | 12.05981000 | 8.57039700  | 3.58264700  |
| O  | 11.70760000 | 7.44595200  | 2.77289400  | C  | 12.93715800 | 6.58846000  | 4.60849300  |
| C  | 11.79100700 | 6.30323500  | 3.63428500  |    |             |             |             |
| C  | 12.05981000 | 8.57039700  | 3.58264700  |    |             |             |             |
| C  | 12.93715800 | 6.58846000  | 4.60849300  |    |             |             |             |

### TS10-2-methylphenyl -n-Oct

|    |             |             |             |
|----|-------------|-------------|-------------|
| Ni | 8.21710100  | 11.57494400 | 0.30510900  |
| C  | 6.48030300  | 11.65937000 | -0.64976600 |
| C  | 6.27086900  | 11.37677900 | 0.71426400  |
| C  | 6.86315200  | 12.20115300 | 1.68097400  |
| C  | 6.77194200  | 11.94427800 | 3.15068900  |
| C  | 7.89564700  | 12.61696000 | 3.95613500  |
| C  | 9.21107200  | 11.90305600 | 3.89730700  |
| C  | 9.96768800  | 11.75992900 | 2.79517500  |
| C  | 9.71563300  | 12.22343000 | 1.42473200  |
| C  | 9.18816300  | 11.45871300 | -1.36928300 |
| C  | 9.95502500  | 12.59145000 | -1.70229300 |
| C  | 10.74036500 | 12.68850600 | -2.84922700 |
| C  | 10.80708600 | 11.61500500 | -3.72807800 |
| C  | 10.03525500 | 10.49074100 | -3.45846400 |
| C  | 9.21888300  | 10.40537100 | -2.32221100 |
| H  | 6.47543200  | 12.69775600 | -0.99056200 |

|   |             |            |             |   |             |             |             |
|---|-------------|------------|-------------|---|-------------|-------------|-------------|
| H | 10.82381300 | 6.20223400 | 4.15483400  | H | 11.42302200 | 11.65998900 | -4.62446200 |
| H | 11.94973400 | 5.42694400 | 2.99723000  | C | 8.39454900  | 9.14658400  | -2.18049500 |
| C | 13.23701200 | 8.08542900 | 4.41059700  | H | 8.88287500  | 8.38408500  | -1.55324600 |
| H | 12.27164000 | 9.40965200 | 2.90922400  | H | 7.41794300  | 9.35068900  | -1.72798800 |
| H | 11.19441300 | 8.84482900 | 4.21130200  | H | 8.21788300  | 8.68273100  | -3.15899400 |
| H | 13.81588200 | 5.98725900 | 4.35809400  | H | 9.95208700  | 13.44865900 | -1.02443900 |
| H | 12.64309600 | 6.35733100 | 5.63742800  | H | 9.02204000  | 9.51487400  | -0.01728000 |
| H | 14.16575200 | 8.19863100 | 3.83907500  | C | 8.75999900  | 8.77758400  | 2.06449300  |
| H | 13.33536400 | 8.63509700 | 5.35126800  | H | 8.47199600  | 9.58599300  | 2.76435400  |
| O | 11.40161900 | 5.32132200 | 0.67178500  | H | 9.47114700  | 8.15568800  | 2.63038100  |
| C | 9.99072400  | 5.03926800 | 0.70411300  | C | 7.56059700  | 7.95441800  | 1.62874600  |
| C | 12.14336300 | 4.14061800 | 0.31244500  | H | 7.90764900  | 7.13328100  | 0.98270600  |
| C | 9.84957800  | 3.63970700 | 0.13462700  | H | 6.90200900  | 8.57068800  | 0.99718300  |
| H | 9.65359600  | 5.09309400 | 1.75296700  | C | 6.77241200  | 7.40565100  | 2.80381400  |
| H | 9.47577100  | 5.82219000 | 0.13843800  | H | 7.43490700  | 6.78968900  | 3.43660400  |
| C | 11.17293800 | 3.00022100 | 0.53688400  | H | 6.44835300  | 8.24511900  | 3.44242700  |
| H | 12.44873000 | 4.22872300 | -0.74332500 | C | 5.55908400  | 6.59035700  | 2.38863900  |
| H | 13.05036800 | 4.11654600 | 0.92517700  | H | 4.91220400  | 7.20753200  | 1.74348900  |
| H | 9.76793600  | 3.68033300 | -0.95999300 | H | 5.88159700  | 5.74223400  | 1.76157200  |
| H | 8.96846400  | 3.11754100 | 0.51871000  | C | 4.74978300  | 6.07310000  | 3.56595400  |
| H | 11.42746000 | 2.10760000 | -0.04161400 | H | 5.39307900  | 5.45145600  | 4.21078100  |
| H | 11.15616400 | 2.72474000 | 1.60041600  | H | 4.43568400  | 6.92371300  | 4.19289800  |
| O | 12.51632600 | 7.07301000 | -1.44429900 | C | 3.52428700  | 5.27232000  | 3.15336500  |
| C | 11.41530500 | 7.06083000 | -2.37025800 | H | 2.88856800  | 5.89498900  | 2.50584200  |
| C | 13.76921700 | 7.13828200 | -2.15193600 | H | 3.83976300  | 4.42052000  | 2.53155100  |
| C | 12.04146600 | 6.75003300 | -3.71302700 | C | 2.72213500  | 4.77613700  | 4.34375500  |
| H | 10.68607900 | 6.31449500 | -2.03168500 | H | 1.84080900  | 4.20304500  | 4.03711200  |
| H | 10.93310500 | 8.04818600 | -2.35931700 | H | 3.33205100  | 4.12973700  | 4.98749300  |
| C | 13.38914300 | 7.45055700 | -3.58774000 | H | 2.37565300  | 5.61496300  | 4.96032300  |
| H | 14.39692700 | 7.89845100 | -1.67261600 |   |             |             |             |
| H | 14.27613500 | 6.16846100 | -2.05083400 |   |             |             |             |
| H | 11.43394400 | 7.11156300 | -4.54829900 |   |             |             |             |
| H | 12.18389300 | 5.66737700 | -3.83297900 |   |             |             |             |
| H | 13.26164000 | 8.53364800 | -3.72775200 |   |             |             |             |
| H | 14.13786400 | 7.10135400 | -4.30449000 |   |             |             |             |

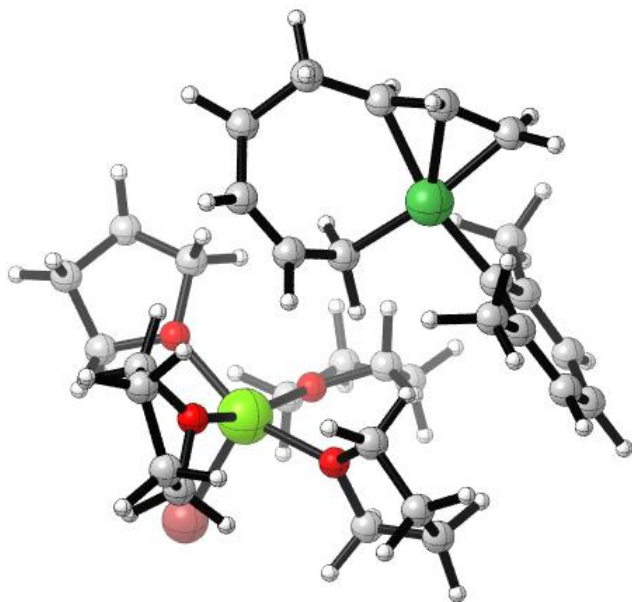

**INT1-2,6-dimethylphenyl**

|    |             |             |             |    |             |             |             |
|----|-------------|-------------|-------------|----|-------------|-------------|-------------|
|    |             |             |             | H  | 11.73553900 | 14.08602700 | 1.94006300  |
|    |             |             |             | H  | 12.14822500 | 12.96650000 | 3.23621600  |
|    |             |             |             | H  | 12.68798200 | 11.17718700 | 1.69844600  |
|    |             |             |             | H  | 12.40741900 | 11.31758700 | -0.64775600 |
|    |             |             |             | H  | 11.70370000 | 13.26419100 | -1.84264800 |
|    |             |             |             | H  | 11.44026000 | 14.20460400 | -0.32944500 |
|    |             |             |             | H  | 8.72282000  | 14.79671700 | -5.21516100 |
|    |             |             |             | H  | 8.78228900  | 12.64270500 | -6.46976400 |
|    |             |             |             | H  | 8.99380900  | 10.50919700 | -5.20548900 |
|    |             |             |             | Mg | 14.55329100 | 13.60263900 | -2.54078900 |
|    |             |             |             | Br | 16.62061900 | 14.06090400 | -3.76424200 |
|    |             |             |             | O  | 13.43891800 | 15.27677400 | -3.07213000 |
|    |             |             |             | C  | 14.10299700 | 16.54437700 | -3.27631200 |
|    |             |             |             | C  | 12.04564800 | 15.37661300 | -3.45875300 |
|    |             |             |             | C  | 12.97808100 | 17.53565100 | -3.48650800 |
|    |             |             |             | H  | 14.73938300 | 16.73413100 | -2.40295300 |
|    |             |             |             | H  | 14.75092500 | 16.45990100 | -4.15961300 |
|    |             |             |             | C  | 11.95696300 | 16.67723800 | -4.22501900 |
|    |             |             |             | H  | 11.77314100 | 14.48145500 | -4.02864000 |
|    |             |             |             | H  | 11.43529100 | 15.39479100 | -2.54705700 |
|    |             |             |             | H  | 13.30091000 | 18.41900300 | -4.04452400 |
|    |             |             |             | H  | 12.56799200 | 17.86739700 | -2.52298300 |
|    |             |             |             | H  | 12.26611600 | 16.53347000 | -5.26927300 |
|    |             |             |             | H  | 10.94407600 | 17.08962300 | -4.22194700 |
|    |             |             |             | O  | 14.99780600 | 14.54351400 | -0.74795900 |
|    |             |             |             | C  | 16.35133700 | 14.76544800 | -0.29741000 |
|    |             |             |             | C  | 14.05647500 | 15.08293500 | 0.21501700  |
|    |             |             |             | C  | 16.20816400 | 15.01702400 | 1.18696200  |
|    |             |             |             | H  | 16.95025200 | 13.88956100 | -0.56801500 |
|    |             |             |             | H  | 16.76385300 | 15.63293800 | -0.83252900 |
|    |             |             |             | C  | 14.90912000 | 15.81309400 | 1.23426200  |
|    |             |             |             | H  | 13.34811800 | 15.72302100 | -0.32607500 |
|    |             |             |             | H  | 13.51603700 | 14.23397300 | 0.65561700  |
|    |             |             |             | H  | 17.06670100 | 15.54687500 | 1.60877200  |
|    |             |             |             | H  | 16.09041400 | 14.06479200 | 1.72227300  |
| Ni | 9.44887300  | 12.74459800 | -0.67412600 |    |             |             |             |
| C  | 7.52519000  | 12.61352200 | -0.32531600 |    |             |             |             |
| C  | 8.27125400  | 12.26775200 | 0.82320700  |    |             |             |             |
| C  | 9.25867300  | 13.13515900 | 1.31948800  |    |             |             |             |
| C  | 10.13184300 | 12.74910400 | 2.47226400  |    |             |             |             |
| C  | 11.63495400 | 13.03607300 | 2.26679800  |    |             |             |             |
| C  | 12.24291100 | 12.08613700 | 1.28718000  |    |             |             |             |
| C  | 12.04769500 | 12.16722200 | -0.05086300 |    |             |             |             |
| C  | 11.36014500 | 13.21160900 | -0.79895900 |    |             |             |             |
| C  | 9.16386100  | 12.67743900 | -2.54947600 |    |             |             |             |
| C  | 8.96194600  | 13.86337400 | -3.28751800 |    |             |             |             |
| C  | 8.85775400  | 13.85303600 | -4.68107300 |    |             |             |             |
| C  | 8.88799200  | 12.65341500 | -5.38605200 |    |             |             |             |
| C  | 9.01375400  | 11.46399900 | -4.67417500 |    |             |             |             |
| C  | 9.15910800  | 11.47225900 | -3.28327800 |    |             |             |             |
| H  | 7.14719800  | 13.63330500 | -0.43844900 |    |             |             |             |
| H  | 6.88573400  | 11.85706800 | -0.77646400 |    |             |             |             |
| H  | 8.30904100  | 11.22054700 | 1.14359100  |    |             |             |             |
| H  | 9.07996400  | 14.21668700 | 1.23204000  |    |             |             |             |
| H  | 10.01532100 | 11.67397800 | 2.68044100  |    |             |             |             |
| H  | 9.80302000  | 13.27744100 | 3.38126400  |    |             |             |             |

|   |             |             |             |
|---|-------------|-------------|-------------|
| H | 15.09050300 | 16.85083000 | 0.92426700  |
| H | 14.43796500 | 15.82906800 | 2.22135800  |
| O | 15.09810400 | 11.76025400 | -1.69379000 |
| C | 15.85049900 | 10.81944900 | -2.47853900 |
| C | 15.35930800 | 11.39941300 | -0.33115200 |
| C | 15.63719800 | 9.48331200  | -1.77419700 |
| H | 15.48312900 | 10.87388300 | -3.50817900 |
| H | 16.90498300 | 11.13318800 | -2.47426700 |
| C | 15.25940100 | 9.88007000  | -0.33137800 |
| H | 16.37628800 | 11.73635300 | -0.06762600 |
| H | 14.61634800 | 11.90190000 | 0.29849700  |
| H | 16.53863700 | 8.86516100  | -1.82018500 |
| H | 14.82822100 | 8.91570700  | -2.24660600 |
| H | 15.91535500 | 9.43150400  | 0.42015600  |
| H | 14.23353500 | 9.57131400  | -0.10135500 |
| O | 13.44391300 | 12.52256100 | -3.90598600 |
| C | 12.51717900 | 11.42421700 | -3.69125100 |
| C | 13.60178500 | 12.76507700 | -5.32532100 |
| C | 12.37113300 | 10.77532600 | -5.04829500 |
| H | 12.93897500 | 10.77936500 | -2.91044600 |
| H | 11.56045900 | 11.83914100 | -3.34319900 |
| C | 12.47871800 | 11.98344200 | -5.97274000 |
| H | 13.57445300 | 13.85050700 | -5.48438600 |
| H | 14.59321100 | 12.40197300 | -5.63184800 |
| H | 11.41415200 | 10.25188500 | -5.13905900 |
| H | 13.18711300 | 10.06337500 | -5.23767800 |
| H | 11.53367500 | 12.54616900 | -5.94428300 |
| H | 12.70103500 | 11.72516000 | -7.01203400 |
| C | 8.78552900  | 15.16215700 | -2.55080600 |
| H | 7.79253800  | 15.20970000 | -2.08207300 |
| H | 9.50838800  | 15.25944500 | -1.72841100 |
| H | 8.86848700  | 16.03769600 | -3.21024800 |
| C | 9.32689200  | 10.16927500 | -2.55158700 |
| H | 10.27964600 | 10.13709900 | -2.00036600 |
| H | 8.54192000  | 10.03489000 | -1.79511600 |

|   |            |            |             |
|---|------------|------------|-------------|
| H | 9.29552600 | 9.30406200 | -3.22742700 |
|---|------------|------------|-------------|

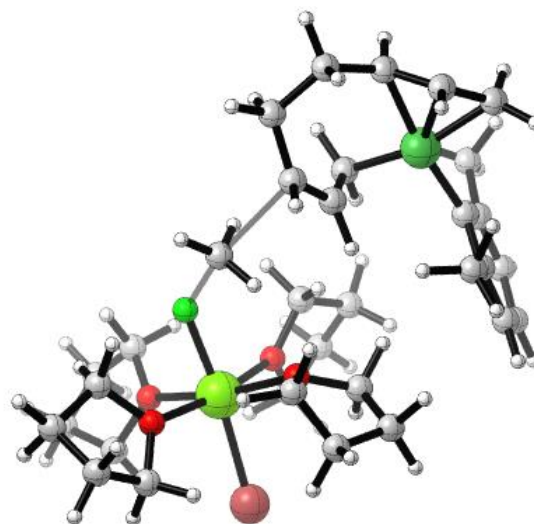

**TS3-2,6-dimethylphenyl-Me**

|    |             |             |             |
|----|-------------|-------------|-------------|
| Ni | 8.45762300  | 11.31014100 | -0.38612700 |
| C  | 7.18128400  | 9.93431600  | 0.15738300  |
| C  | 7.65498400  | 10.64310300 | 1.28602100  |
| C  | 7.62113500  | 12.04757200 | 1.33345800  |
| C  | 8.36068600  | 12.78785800 | 2.41237500  |
| C  | 9.51561600  | 13.71580300 | 1.94780300  |
| C  | 10.55971000 | 12.98769800 | 1.16643700  |
| C  | 10.26996100 | 12.57224600 | -0.12968900 |
| C  | 9.22138500  | 13.03195000 | -0.96958400 |
| C  | 9.04998300  | 10.42729600 | -1.97166000 |
| C  | 8.53930000  | 10.72122900 | -3.25423500 |
| C  | 9.13565000  | 10.21061900 | -4.41018200 |
| C  | 10.24277700 | 9.37223700  | -4.33288900 |
| C  | 10.72635900 | 9.02144400  | -3.07880300 |
| C  | 10.14317600 | 9.53485800  | -1.91365400 |
| H  | 6.25219000  | 10.24668500 | -0.32834100 |
| H  | 7.37676900  | 8.86589000  | 0.09042100  |
| H  | 8.35349400  | 10.13973400 | 1.96398700  |



|    |             |             |             |   |             |             |             |
|----|-------------|-------------|-------------|---|-------------|-------------|-------------|
| H  | 6.76008800  | 12.56476200 | 0.89482500  | H | 17.23426500 | 13.02005800 | -0.89229100 |
| H  | 8.80293200  | 12.05383900 | 3.10441100  | H | 17.92866100 | 14.46632100 | -1.63774800 |
| H  | 7.65725900  | 13.38647200 | 3.01085100  | C | 17.20428100 | 15.99928800 | 0.58592200  |
| H  | 9.09364800  | 14.53852000 | 1.34679000  | H | 15.40540100 | 16.61348300 | -0.53499900 |
| H  | 9.94745900  | 14.18602100 | 2.84304400  | H | 15.10013700 | 15.45003700 | 0.77512600  |
| H  | 11.27432800 | 12.38628400 | 1.73933800  | H | 18.89953200 | 14.58810000 | 0.61675700  |
| H  | 11.01113200 | 11.92515800 | -0.61474800 | H | 17.39907300 | 13.98262400 | 1.34920900  |
| H  | 9.39503200  | 13.02078200 | -2.04580700 | H | 17.77793900 | 16.67815200 | -0.05971900 |
| H  | 8.62253700  | 13.87826100 | -0.62312300 | H | 17.16798000 | 16.43560000 | 1.58810200  |
| H  | 8.71520900  | 10.46711400 | -5.38492200 | O | 13.80847600 | 12.33391700 | -1.62548600 |
| H  | 11.56599600 | 8.32737200  | -2.99584800 | C | 13.36068800 | 11.27309500 | -2.51412200 |
| C  | 12.22210800 | 14.45390000 | -0.05108900 | C | 14.49033700 | 11.72464700 | -0.52094500 |
| H  | 12.43894400 | 14.96436500 | 0.88173100  | C | 14.12445000 | 10.01842100 | -2.09256300 |
| H  | 12.59383300 | 13.45168800 | -0.16717300 | H | 12.27239100 | 11.15176400 | -2.40584700 |
| H  | 11.29788000 | 14.71463300 | -0.55046600 | H | 13.59051400 | 11.59348500 | -3.53543300 |
| F  | 13.28531400 | 15.18878200 | -1.10389900 | C | 15.20162000 | 10.54491200 | -1.14472100 |
| Mg | 14.49100200 | 14.22347800 | -2.40301700 | H | 15.13404000 | 12.49103200 | -0.06861900 |
| Br | 16.20908600 | 13.15764800 | -3.86744100 | H | 13.74532700 | 11.40040900 | 0.22730400  |
| O  | 14.80149100 | 16.17336700 | -3.19802800 | H | 14.54419700 | 9.49121500  | -2.95393900 |
| C  | 16.05381800 | 16.66728600 | -3.70505300 | H | 13.45301900 | 9.32819400  | -1.56579700 |
| C  | 13.76852700 | 17.15880100 | -3.35588100 | H | 16.06918800 | 10.89993700 | -1.71571800 |
| C  | 15.83395100 | 18.15666400 | -3.87636900 | H | 15.52959600 | 9.80437900  | -0.40936200 |
| H  | 16.83555400 | 16.39512700 | -2.98606800 | O | 12.90175900 | 14.09669700 | -3.78157400 |
| H  | 16.27258800 | 16.16158200 | -4.65579200 | C | 11.51133600 | 13.90748500 | -3.44832300 |
| C  | 14.36465900 | 18.19981100 | -4.28281600 | C | 13.08141000 | 14.05956600 | -5.21373000 |
| H  | 12.87488200 | 16.65260200 | -3.74098500 | C | 10.87850900 | 13.38425800 | -4.71827800 |
| H  | 13.52812500 | 17.58092900 | -2.36997000 | H | 11.44111900 | 13.22052000 | -2.60003500 |
| H  | 16.51064600 | 18.60102900 | -4.61137200 | H | 11.08527400 | 14.87759400 | -3.14482600 |
| H  | 15.97587500 | 18.67729700 | -2.91908600 | C | 11.67661800 | 14.13694200 | -5.77900200 |
| H  | 14.25297700 | 17.89136300 | -5.33096500 | H | 13.75145600 | 14.88610300 | -5.48282200 |
| H  | 13.90124600 | 19.18343300 | -4.16550000 | H | 13.58401200 | 13.12079900 | -5.48372800 |
| O  | 15.98832700 | 14.66943300 | -0.92222100 | H | 9.79858700  | 13.56084700 | -4.75110100 |
| C  | 17.31306200 | 14.10776400 | -0.80213600 | H | 11.03549100 | 12.29890400 | -4.79993300 |
| C  | 15.82342100 | 15.75789200 | 0.00712100  | H | 11.33956900 | 15.18152200 | -5.83966100 |
| C  | 17.80896600 | 14.60200700 | 0.53946000  | H | 11.60608600 | 13.69815100 | -6.77812500 |

|   |             |             |             |
|---|-------------|-------------|-------------|
| C | 10.69791400 | 9.09681700  | -0.58324800 |
| H | 11.23497900 | 9.90335100  | -0.05822600 |
| H | 9.89493300  | 8.78110300  | 0.09476900  |
| H | 11.39356100 | 8.25364300  | -0.69175000 |
| C | 7.30844100  | 11.57352400 | -3.38944100 |
| H | 6.45193300  | 11.09887600 | -2.89253400 |
| H | 7.43478400  | 12.55228700 | -2.90742100 |
| H | 7.03466100  | 11.73937300 | -4.43939000 |
| H | 10.69728000 | 8.96877400  | -5.23613500 |

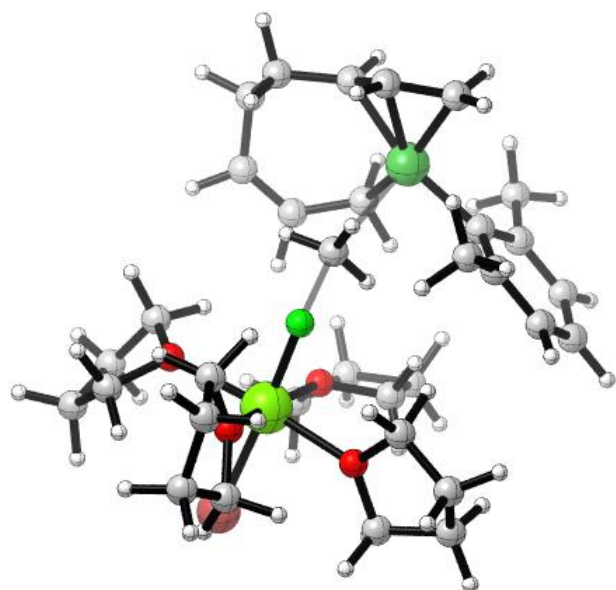

**TS10-2,6-dimethylphenyl -Me**

|    |             |             |             |
|----|-------------|-------------|-------------|
| Ni | 8.30421800  | 11.70802200 | 0.18268600  |
| C  | 6.49111500  | 11.83123600 | -0.61587100 |
| C  | 6.42097200  | 11.31246900 | 0.69170600  |
| C  | 7.04903700  | 12.01079100 | 1.73593100  |
| C  | 7.13120600  | 11.49719100 | 3.13955000  |
| C  | 8.26083700  | 12.14139300 | 3.96175000  |
| C  | 9.61882600  | 11.56576300 | 3.69971900  |
| C  | 10.27198500 | 11.63474100 | 2.52761300  |
| C  | 9.85588200  | 12.27956600 | 1.27258300  |

|    |             |             |             |
|----|-------------|-------------|-------------|
| C  | 9.19485900  | 11.69415700 | -1.54429800 |
| C  | 9.90920500  | 12.84095200 | -1.97499000 |
| C  | 10.75876300 | 12.80828400 | -3.08390800 |
| C  | 10.90976400 | 11.65194000 | -3.83920300 |
| C  | 10.12248100 | 10.55609700 | -3.52027500 |
| C  | 9.26011900  | 10.57516200 | -2.41357800 |
| H  | 6.40183500  | 12.91042900 | -0.76965500 |
| H  | 6.12830000  | 11.24028300 | -1.45283800 |
| H  | 6.17596800  | 10.25447200 | 0.84077600  |
| H  | 7.01621900  | 13.10881100 | 1.67668600  |
| H  | 7.24766400  | 10.40056300 | 3.14516400  |
| H  | 6.17857200  | 11.70356400 | 3.65390700  |
| H  | 8.24967400  | 13.22453900 | 3.75160400  |
| H  | 8.02443200  | 12.04331300 | 5.02879000  |
| H  | 10.09864800 | 11.03849400 | 4.52706400  |
| H  | 11.23611100 | 11.11255600 | 2.48540000  |
| H  | 10.72902700 | 12.37185600 | 0.61305700  |
| H  | 9.48346700  | 13.29674300 | 1.48791800  |
| H  | 11.30045900 | 13.71347400 | -3.36355700 |
| H  | 10.13981400 | 9.67073400  | -4.16205100 |
| C  | 9.41158800  | 9.53143600  | 0.64737100  |
| H  | 10.16015700 | 10.01912100 | 0.05060700  |
| F  | 10.19207900 | 7.93271500  | 0.49937200  |
| Mg | 12.04905700 | 7.45176700  | 0.80528600  |
| Br | 14.42592700 | 6.84670400  | 1.32896000  |
| O  | 12.58539400 | 9.59740700  | 0.63416500  |
| C  | 13.66682700 | 10.20929500 | 1.36073900  |
| C  | 12.67981500 | 10.13785300 | -0.70253300 |
| C  | 13.63387600 | 11.65873800 | 0.92106000  |
| H  | 13.48468900 | 10.04646900 | 2.42836700  |
| H  | 14.60695500 | 9.70458400  | 1.09091000  |
| C  | 13.21505700 | 11.56385300 | -0.55323100 |
| H  | 13.37087900 | 9.50855900  | -1.28220400 |
| H  | 11.68828500 | 10.08953000 | -1.16982800 |
| H  | 14.60189100 | 12.14888100 | 1.06148600  |

|   |             |             |             |                                      |             |             |             |
|---|-------------|-------------|-------------|--------------------------------------|-------------|-------------|-------------|
| H | 12.88524600 | 12.21525800 | 1.49712800  | C                                    | 13.26160400 | 7.30637000  | -3.46825600 |
| H | 14.06184000 | 11.72385000 | -1.22848500 | H                                    | 14.35419000 | 7.71556600  | -1.58757900 |
| H | 12.44719300 | 12.30153700 | -0.80935900 | H                                    | 14.01687800 | 6.00565700  | -1.88478200 |
| O | 11.50701800 | 7.19918400  | 2.88627600  | H                                    | 11.28691400 | 7.02068900  | -4.40827000 |
| C | 11.90685800 | 6.05766100  | 3.65421600  | H                                    | 11.96700900 | 5.57866200  | -3.62600600 |
| C | 11.55141000 | 8.30567800  | 3.78937700  | H                                    | 13.18647500 | 8.39061800  | -3.63546400 |
| C | 12.97571600 | 6.55674200  | 4.62641300  | H                                    | 13.98705200 | 6.89667900  | -4.17667900 |
| H | 11.01824300 | 5.68163800  | 4.18651300  | H                                    | 11.57650300 | 11.63019200 | -4.69929600 |
| H | 12.25605000 | 5.29487000  | 2.95043900  | C                                    | 8.37186700  | 9.36181000  | -2.25910500 |
| C | 12.82028800 | 8.08922600  | 4.60107700  | H                                    | 8.85223200  | 8.52839200  | -1.72675400 |
| H | 11.52294800 | 9.22435800  | 3.19200900  | H                                    | 7.45125500  | 9.60211300  | -1.71754600 |
| H | 10.64923500 | 8.28523300  | 4.42128800  | H                                    | 8.08110700  | 8.97506100  | -3.24404100 |
| H | 13.97066400 | 6.27016700  | 4.27434100  | H                                    | 8.48615600  | 9.22040900  | 0.18672900  |
| H | 12.82417000 | 6.13801300  | 5.62639000  | C                                    | 9.75409000  | 14.16323100 | -1.26812200 |
| H | 13.68022300 | 8.53683900  | 4.08938400  | H                                    | 8.71912700  | 14.32089400 | -0.93866200 |
| H | 12.74693600 | 8.53406200  | 5.59791900  | H                                    | 10.38350600 | 14.23766000 | -0.37236000 |
| O | 11.33554800 | 5.39227300  | 0.65615800  | H                                    | 10.02283700 | 14.99689700 | -1.92760500 |
| C | 9.99935700  | 4.94822000  | 0.95123400  | H                                    | 9.44808400  | 9.62259800  | 1.72664900  |
| C | 12.10875200 | 4.32107900  | 0.09408700  |                                      |             |             |             |
| C | 9.90131800  | 3.56086700  | 0.34216700  |                                      |             |             |             |
| H | 9.87974400  | 4.92352400  | 2.04496700  |                                      |             |             |             |
| H | 9.29640100  | 5.68188000  | 0.54599500  |                                      |             |             |             |
| C | 11.33983500 | 3.06875900  | 0.45610500  |                                      |             |             |             |
| H | 12.16450100 | 4.46087900  | -0.99800500 |                                      |             |             |             |
| H | 13.12191100 | 4.39256100  | 0.50614300  |                                      |             |             |             |
| H | 9.60892500  | 3.62654600  | -0.71482800 |                                      |             |             |             |
| H | 9.17230300  | 2.92724300  | 0.85520600  |                                      |             |             |             |
| H | 11.57170400 | 2.22310600  | -0.19749100 |                                      |             |             |             |
| H | 11.56288400 | 2.77385400  | 1.49062700  |                                      |             |             |             |
| O | 12.38228300 | 7.15158900  | -1.31009000 |                                      |             |             |             |
| C | 11.27515100 | 7.08460200  | -2.23066800 |                                      |             |             |             |
| C | 13.62746600 | 7.02450200  | -2.02618400 |                                      |             |             |             |
| C | 11.88007200 | 6.67163600  | -3.55765300 |                                      |             |             |             |
| H | 10.53687600 | 6.37965300  | -1.82772300 | <b>TS3-2,6-dimethylphenyl -n-Oct</b> |             |             |             |
| H | 10.81588300 | 8.08137200  | -2.29408100 | Ni                                   | 8.42163800  | 11.17494100 | -0.42189200 |
|   |             |             |             | C                                    | 7.14202700  | 9.78659000  | 0.08272100  |

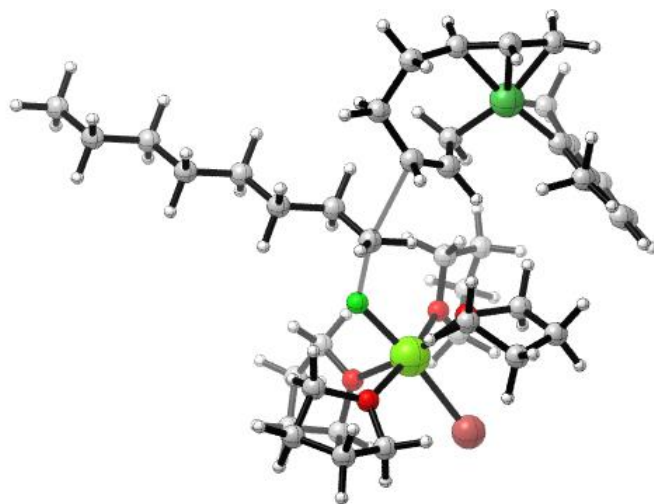

|    |             |             |             |   |             |             |             |
|----|-------------|-------------|-------------|---|-------------|-------------|-------------|
| C  | 7.57412000  | 10.50051700 | 1.22353800  | C | 15.86034700 | 18.16886100 | -3.82654600 |
| C  | 7.53083900  | 11.90633700 | 1.26579900  | H | 16.84441200 | 16.33003200 | -3.07886700 |
| C  | 8.23744600  | 12.65160800 | 2.36370500  | H | 16.23240500 | 16.22249500 | -4.74502300 |
| C  | 9.34860300  | 13.64329200 | 1.92420800  | C | 14.37981200 | 18.26998000 | -4.17973300 |
| C  | 10.44148700 | 12.97895200 | 1.15312000  | H | 12.87131800 | 16.72317300 | -3.70129700 |
| C  | 10.19897200 | 12.53075400 | -0.13869600 | H | 13.57923400 | 17.53423900 | -2.28349100 |
| C  | 9.13973900  | 12.91356800 | -1.00434200 | H | 16.52226800 | 18.64400700 | -4.55580300 |
| C  | 9.11689800  | 10.27794200 | -1.95704800 | H | 16.04668000 | 18.62694500 | -2.84514800 |
| C  | 8.71664100  | 10.56042700 | -3.28058200 | H | 14.22869600 | 18.03063700 | -5.24108200 |
| C  | 9.41557700  | 10.04682200 | -4.37757500 | H | 13.94382400 | 19.25413800 | -3.98673800 |
| C  | 10.50218700 | 9.19755900  | -4.19972900 | O | 16.03042000 | 14.65369400 | -0.98425200 |
| C  | 10.86729300 | 8.84601500  | -2.90620900 | C | 17.31973800 | 14.02304100 | -0.84753200 |
| C  | 10.19674700 | 9.38006700  | -1.79972700 | C | 15.91209000 | 15.74967800 | -0.05842100 |
| H  | 6.23207400  | 10.09423000 | -0.44085800 | C | 17.85084500 | 14.52758400 | 0.47769700  |
| H  | 7.34484200  | 8.71905100  | 0.02457000  | H | 17.18016000 | 12.93889400 | -0.90224300 |
| H  | 8.25367900  | 10.00196200 | 1.92390500  | H | 17.95268900 | 14.31942700 | -1.69491500 |
| H  | 6.67392400  | 12.41697000 | 0.81147300  | C | 17.30833300 | 15.95073500 | 0.49571800  |
| H  | 8.71100200  | 11.92101900 | 3.03823300  | H | 15.50741600 | 16.61344400 | -0.59773000 |
| H  | 7.50913700  | 13.20586900 | 2.97526500  | H | 15.19118800 | 15.47151400 | 0.72415900  |
| H  | 8.88041800  | 14.45029500 | 1.33270000  | H | 18.94033100 | 14.46546700 | 0.54703200  |
| H  | 9.74446000  | 14.12405300 | 2.83092200  | H | 17.42029600 | 13.94856500 | 1.30636100  |
| H  | 11.20306300 | 12.45313600 | 1.73711500  | H | 17.89979500 | 16.58835900 | -0.17589300 |
| H  | 10.97344700 | 11.90087900 | -0.59398400 | H | 17.30465600 | 16.41367200 | 1.48665800  |
| H  | 9.34653600  | 12.90532800 | -2.07529400 | O | 13.67880400 | 12.41616800 | -1.66611800 |
| H  | 8.48619700  | 13.73021300 | -0.68393300 | C | 13.28271400 | 11.31322600 | -2.51980200 |
| H  | 9.08398500  | 10.30108000 | -5.38670900 | C | 14.23068300 | 11.84839200 | -0.47558400 |
| H  | 11.68479900 | 8.13935000  | -2.74685800 | C | 14.15146500 | 10.12299000 | -2.10741800 |
| C  | 12.05479400 | 14.56221100 | -0.17837500 | H | 12.21219300 | 11.11059800 | -2.35976100 |
| H  | 11.94980000 | 13.71225900 | -0.82906300 | H | 13.43694500 | 11.63590600 | -3.55405400 |
| F  | 13.38854800 | 15.22138900 | -1.11709300 | C | 15.03374100 | 10.66574100 | -0.97643200 |
| Mg | 14.46947700 | 14.23470800 | -2.44227500 | H | 14.81205600 | 12.63341800 | 0.02540000  |
| Br | 16.13053000 | 13.08066600 | -3.89909900 | H | 13.40683000 | 11.53617400 | 0.18965800  |
| O  | 14.80130000 | 16.16874000 | -3.24824800 | H | 14.75283300 | 9.75691100  | -2.94436100 |
| C  | 16.05040800 | 16.66651600 | -3.75597900 | H | 13.51597600 | 9.30079600  | -1.75905400 |
| C  | 13.78630300 | 17.18290800 | -3.30534100 | H | 15.99006400 | 11.01767800 | -1.38382600 |



|    |             |             |             |   |             |             |             |
|----|-------------|-------------|-------------|---|-------------|-------------|-------------|
| C  | 9.78983400  | 12.27570900 | 1.52293500  | H | 14.80519400 | 11.95494500 | 0.90913800  |
| C  | 9.27908900  | 11.63465800 | -1.39792000 | H | 13.20739700 | 11.71926700 | 1.65011600  |
| C  | 10.06842000 | 12.72305200 | -1.84977000 | H | 13.91306800 | 11.65142100 | -1.31389800 |
| C  | 10.87035100 | 12.63117300 | -2.99065300 | H | 12.45923500 | 12.30706300 | -0.56074000 |
| C  | 10.90015400 | 11.47191900 | -3.75487700 | O | 11.62382000 | 7.51334600  | 2.82140400  |
| C  | 10.06117700 | 10.42861400 | -3.39563200 | C | 11.62570800 | 6.36903400  | 3.68224700  |
| C  | 9.24909300  | 10.50445100 | -2.25486400 | C | 12.03976700 | 8.60894100  | 3.64101500  |
| H  | 6.69096400  | 13.15347400 | -0.99880300 | C | 12.86500700 | 6.52728400  | 4.55437800  |
| H  | 6.31165800  | 11.46177300 | -1.57017900 | H | 10.69448500 | 6.38648500  | 4.27479500  |
| H  | 5.91454800  | 10.71866800 | 0.77780900  | H | 11.63146400 | 5.47946200  | 3.04306300  |
| H  | 7.06048600  | 13.50376200 | 1.46825800  | C | 13.12571100 | 8.04667200  | 4.55537600  |
| H  | 6.70132800  | 10.98529200 | 3.21563500  | H | 12.36397600 | 9.41563800  | 2.97258300  |
| H  | 5.77802100  | 12.46823400 | 3.42744300  | H | 11.16772100 | 8.96787300  | 4.21488700  |
| H  | 7.99635800  | 13.72307800 | 3.65840800  | H | 13.70733600 | 6.01027800  | 4.08281700  |
| H  | 7.47357800  | 12.72959000 | 5.00518200  | H | 12.70959800 | 6.11934700  | 5.55775300  |
| H  | 9.44881200  | 11.45933100 | 4.89686800  | H | 14.12303300 | 8.25315300  | 4.15277600  |
| H  | 10.83406300 | 11.14937200 | 3.06600800  | H | 13.06685400 | 8.48993800  | 5.55417300  |
| H  | 10.75005500 | 12.20973000 | 0.99101400  | O | 11.17974100 | 5.38120700  | 0.67678600  |
| H  | 9.48480800  | 13.33661900 | 1.54994800  | C | 9.75595500  | 5.16909200  | 0.69870500  |
| H  | 11.46823100 | 13.49389700 | -3.28941900 | C | 11.86654400 | 4.15129600  | 0.37467400  |
| H  | 10.00132300 | 9.53946500  | -4.02959700 | C | 9.55248700  | 3.76709300  | 0.15607200  |
| C  | 9.46063300  | 9.53607700  | 0.99474900  | H | 9.40991000  | 5.25889600  | 1.74255200  |
| H  | 10.42363000 | 10.00372300 | 1.14036300  | H | 9.28679300  | 5.96517700  | 0.11347300  |
| F  | 10.34456100 | 7.96352300  | 0.29251300  | C | 10.83141700 | 3.06977500  | 0.60208700  |
| Mg | 12.11002900 | 7.33183800  | 0.70082500  | H | 12.20732900 | 4.19252300  | -0.67313900 |
| Br | 14.36862000 | 6.41033700  | 1.30852200  | H | 12.75210400 | 4.09145200  | 1.01562300  |
| O  | 12.85783500 | 9.34696500  | 0.47925800  | H | 9.49580000  | 3.78773700  | -0.94070100 |
| C  | 14.09354700 | 9.88797500  | 0.96690500  | H | 8.63674000  | 3.30160100  | 0.53235800  |
| C  | 12.49615400 | 10.12905800 | -0.68454500 | H | 11.05165600 | 2.15116400  | 0.05086900  |
| C  | 13.87700900 | 11.37949000 | 0.84716200  | H | 10.77663700 | 2.82153300  | 1.67108500  |
| H  | 14.25975800 | 9.50686800  | 1.97893400  | O | 12.42795100 | 7.05875700  | -1.38218000 |
| H  | 14.92530000 | 9.53740100  | 0.33449100  | C | 11.32901100 | 7.00576800  | -2.30914400 |
| C  | 13.18320800 | 11.48735200 | -0.51272300 | C | 13.68329400 | 7.04469600  | -2.08527200 |
| H  | 12.84083600 | 9.59648600  | -1.58209700 | C | 11.95640900 | 6.63656900  | -3.63755900 |
| H  | 11.40407600 | 10.19185200 | -0.72633300 | H | 10.60218800 | 6.27393300  | -1.93495100 |

|   |             |             |             |   |             |             |             |
|---|-------------|-------------|-------------|---|-------------|-------------|-------------|
| H | 10.85005400 | 7.99464500  | -2.33891500 | H | 2.80832400  | 4.80545000  | 4.93058400  |
| C | 13.31688200 | 7.31575400  | -3.53197000 | C | 10.04231000 | 14.04993600 | -1.13524800 |
| H | 14.33874500 | 7.79677000  | -1.63098300 | H | 9.02590600  | 14.30904500 | -0.81117800 |
| H | 14.15225000 | 6.05996300  | -1.94891200 | H | 10.66638700 | 14.05761600 | -0.23216200 |
| H | 11.35965900 | 6.97781400  | -4.48892100 | H | 10.39942300 | 14.85696000 | -1.78588100 |
| H | 12.08064100 | 5.54810500  | -3.71865300 |   |             |             |             |
| H | 13.21229900 | 8.39577600  | -3.70784400 |   |             |             |             |
| H | 14.06065100 | 6.92735200  | -4.23356900 |   |             |             |             |
| H | 11.52320200 | 11.40717400 | -4.64519900 |   |             |             |             |
| C | 8.32627100  | 9.32515700  | -2.03735200 |   |             |             |             |
| H | 8.81783800  | 8.48856400  | -1.51682300 |   |             |             |             |
| H | 7.44257100  | 9.60152900  | -1.45073800 |   |             |             |             |
| H | 7.97076600  | 8.93464500  | -2.99898300 |   |             |             |             |
| H | 8.98553700  | 9.68086500  | 0.03923200  |   |             |             |             |
| C | 8.72931600  | 8.93235800  | 2.11905300  |   |             |             |             |
| H | 8.46064500  | 9.74196000  | 2.82420000  |   |             |             |             |
| H | 9.43820400  | 8.29950900  | 2.67495800  |   |             |             |             |
| C | 7.51633800  | 8.12380200  | 1.69438700  |   |             |             |             |
| H | 7.82764700  | 7.40265200  | 0.92355400  |   |             |             |             |
| H | 6.77941600  | 8.78528100  | 1.21160100  |   |             |             |             |
| C | 6.86132900  | 7.38417100  | 2.84799200  |   |             |             |             |
| H | 7.62261100  | 6.78644300  | 3.37906200  |   |             |             |             |
| H | 6.48389700  | 8.10895100  | 3.58812200  |   |             |             |             |
| C | 5.73291700  | 6.47225600  | 2.39661200  |   |             |             |             |
| H | 4.98749400  | 7.06161800  | 1.83831700  |   |             |             |             |
| H | 6.13117100  | 5.73848000  | 1.67419000  |   |             |             |             |
| C | 5.04608300  | 5.73736500  | 3.53541000  |   |             |             |             |
| H | 5.79040900  | 5.14622900  | 4.09462100  |   |             |             |             |
| H | 4.64663300  | 6.46917800  | 4.25656300  |   |             |             |             |
| C | 3.92283900  | 4.82422000  | 3.06953800  |   |             |             |             |
| H | 3.18336100  | 5.41852800  | 2.51195000  |   |             |             |             |
| H | 4.32465500  | 4.09614100  | 2.34799700  |   |             |             |             |
| C | 3.24325400  | 4.09569600  | 4.21582800  |   |             |             |             |
| H | 2.43786200  | 3.44074300  | 3.86713400  |   |             |             |             |
| H | 3.96007600  | 3.47562800  | 4.76886200  |   |             |             |             |

**Table 9**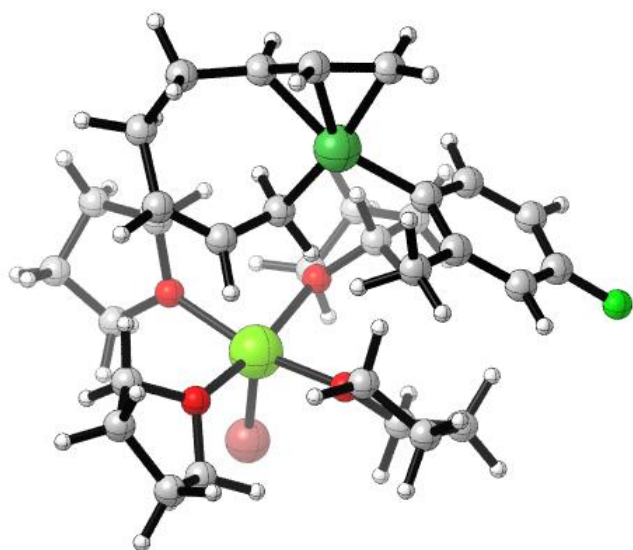**INT1-4-fluoro-2-methylphenyl**

|    |             |             |             |    |             |             |             |
|----|-------------|-------------|-------------|----|-------------|-------------|-------------|
| Ni | 9.51010400  | 12.80004800 | -0.73858500 | H  | 11.80268100 | 14.05259500 | 1.92777600  |
| C  | 7.57520800  | 12.85403400 | -0.45238800 | H  | 12.09829400 | 12.93204400 | 3.25401500  |
| C  | 8.24689100  | 12.48149700 | 0.73098000  | H  | 12.61955800 | 11.10158400 | 1.76596700  |
| C  | 9.30132700  | 13.26597100 | 1.22999600  | H  | 12.41276300 | 11.19739800 | -0.58537400 |
| C  | 10.10242900 | 12.82790200 | 2.41623100  | H  | 11.82326100 | 13.13971300 | -1.84640200 |
| C  | 11.62645100 | 13.01584100 | 2.26511400  | H  | 11.57239200 | 14.12932800 | -0.36518500 |
| C  | 12.21617200 | 12.01559600 | 1.32422300  | H  | 8.80809100  | 14.71771600 | -5.37808700 |
| C  | 12.06726300 | 12.07391300 | -0.01968000 | H  | 8.91575000  | 10.44746100 | -5.22817400 |
| C  | 11.44986800 | 13.13061800 | -0.81238300 | Mg | 14.50495000 | 13.58146500 | -2.50803500 |
| C  | 9.23887000  | 12.67681900 | -2.61513800 | Br | 16.53982900 | 14.08617300 | -3.77318900 |
| C  | 9.08011900  | 13.82836100 | -3.40305500 | O  | 13.34665100 | 15.23838400 | -2.95950100 |
| C  | 8.91785300  | 13.80754800 | -4.79073800 | C  | 13.96036100 | 16.52877300 | -3.16978300 |
| C  | 8.87994600  | 12.57699500 | -5.41918500 | C  | 11.94675400 | 15.28350400 | -3.33103900 |
| C  | 8.98520100  | 11.39846100 | -4.69863400 | C  | 12.79272100 | 17.48126100 | -3.31847000 |
| C  | 9.16302100  | 11.44895000 | -3.31241800 | H  | 14.62388500 | 16.72616600 | -2.31871700 |
| H  | 7.31720400  | 13.90170400 | -0.63295000 | H  | 14.57619400 | 16.48012600 | -4.07890500 |
| H  | 6.88047300  | 12.14727000 | -0.90273300 | C  | 11.78222400 | 16.60388100 | -4.05072800 |
| H  | 8.17478200  | 11.44668000 | 1.08378200  | H  | 11.71689600 | 14.39757900 | -3.93220000 |
| H  | 9.22541900  | 14.35674600 | 1.11700600  | H  | 11.34406500 | 15.23044600 | -2.41500000 |
| H  | 9.90649600  | 11.76385300 | 2.62151800  | H  | 13.06329500 | 18.39203700 | -3.85986100 |
| H  | 9.77594800  | 13.38160100 | 3.31098800  | H  | 12.40211600 | 17.76815100 | -2.33267100 |
|    |             |             |             | H  | 12.06097800 | 16.50699100 | -5.10881200 |
|    |             |             |             | H  | 10.75284600 | 16.97111200 | -4.00154700 |
|    |             |             |             | O  | 15.01568800 | 14.51979300 | -0.71853500 |
|    |             |             |             | C  | 16.38755700 | 14.78407200 | -0.35080300 |
|    |             |             |             | C  | 14.11886500 | 15.04374600 | 0.29091600  |
|    |             |             |             | C  | 16.32569300 | 15.05897100 | 1.13504500  |
|    |             |             |             | H  | 16.99033600 | 13.91840200 | -0.64406700 |
|    |             |             |             | H  | 16.74637800 | 15.65188400 | -0.92272500 |
|    |             |             |             | C  | 15.00784400 | 15.81675900 | 1.24594200  |
|    |             |             |             | H  | 13.36004000 | 15.65566800 | -0.21287500 |
|    |             |             |             | H  | 13.62573400 | 14.18870500 | 0.77520600  |
|    |             |             |             | H  | 17.19095400 | 15.62353200 | 1.49331200  |
|    |             |             |             | H  | 16.27175900 | 14.11498100 | 1.69449300  |
|    |             |             |             | H  | 15.13903800 | 16.85213100 | 0.90402900  |



|   |             |             |             |
|---|-------------|-------------|-------------|
| H | 14.59618500 | 15.84244300 | 2.25881700  |
| O | 15.07215500 | 11.74771100 | -1.67422900 |
| C | 15.84266900 | 10.82097800 | -2.45885900 |
| C | 15.36399100 | 11.40915600 | -0.31082600 |
| C | 15.65883700 | 9.48632900  | -1.74615300 |
| H | 15.47330800 | 10.86568500 | -3.48857300 |
| H | 16.89093200 | 11.15577400 | -2.45690800 |
| C | 15.32722800 | 9.88630300  | -0.29269900 |
| H | 16.36747400 | 11.79384900 | -0.06242600 |
| H | 14.60574400 | 11.88167100 | 0.32320000  |
| H | 16.55939200 | 8.86988900  | -1.82129200 |
| H | 14.83528600 | 8.91658900  | -2.18976600 |
| H | 16.03475100 | 9.47555900  | 0.43338500  |
| H | 14.32681300 | 9.53843000  | -0.01118000 |
| O | 13.44771700 | 12.48966700 | -3.92519400 |
| C | 12.53507400 | 11.37402800 | -3.74670600 |
| C | 13.59773800 | 12.78176400 | -5.33652900 |
| C | 12.38193600 | 10.77658500 | -5.12641200 |
| H | 12.96749700 | 10.70035700 | -2.99668700 |
| H | 11.57867400 | 11.76575400 | -3.37367200 |
| C | 12.47469100 | 12.01883700 | -6.00632600 |
| H | 13.56671300 | 13.87167200 | -5.45893900 |
| H | 14.58916000 | 12.43330000 | -5.65902000 |
| H | 11.42991500 | 10.24582100 | -5.22866600 |
| H | 13.20333700 | 10.08117900 | -5.34981300 |
| H | 11.52926200 | 12.57803500 | -5.95682600 |
| H | 12.69081500 | 11.79974700 | -7.05561200 |
| C | 9.29417800  | 10.16421300 | -2.54498400 |
| H | 10.23666700 | 10.13700500 | -1.97736100 |
| H | 8.49398300  | 10.06965500 | -1.79833400 |
| H | 9.25787300  | 9.28048300  | -3.19538000 |
| H | 9.08217800  | 14.80708000 | -2.91316300 |
| F | 8.74761400  | 12.51709600 | -6.76097300 |

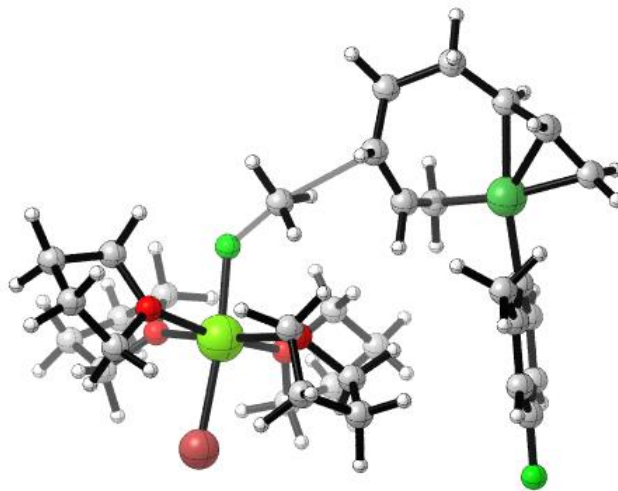

**TS3-4-fluoro-2-methylphenyl**

|    |             |             |             |
|----|-------------|-------------|-------------|
| Ni | 8.55487300  | 11.21476700 | -0.34512500 |
| C  | 7.26799400  | 9.85762100  | 0.23225000  |
| C  | 7.67962600  | 10.64525300 | 1.32922100  |
| C  | 7.63445800  | 12.05061100 | 1.27257100  |
| C  | 8.32800100  | 12.86918000 | 2.32589400  |
| C  | 9.48894500  | 13.77827600 | 1.84163200  |
| C  | 10.56598800 | 13.01998200 | 1.13598700  |
| C  | 10.32116000 | 12.52200800 | -0.14068400 |
| C  | 9.27922600  | 12.91247800 | -1.02529800 |
| C  | 9.22845300  | 10.22218500 | -1.83354600 |
| C  | 8.87957200  | 10.51368300 | -3.16161200 |
| C  | 9.43751600  | 9.87264200  | -4.27009800 |
| C  | 10.39000100 | 8.89744900  | -4.04365900 |
| C  | 10.77955400 | 8.55914100  | -2.75896300 |
| C  | 10.20902600 | 9.21699500  | -1.66334800 |
| H  | 6.37303600  | 10.13310200 | -0.33231500 |
| H  | 7.46982600  | 8.78839100  | 0.24375800  |
| H  | 8.34812300  | 10.19668900 | 2.07287300  |
| H  | 6.78383300  | 12.52631900 | 0.77183700  |
| H  | 8.75293200  | 12.18607000 | 3.07835300  |
| H  | 7.59800300  | 13.49628000 | 2.85993200  |
| H  | 9.07793600  | 14.55942300 | 1.17993500  |

|    |             |             |             |   |             |             |             |
|----|-------------|-------------|-------------|---|-------------|-------------|-------------|
| H  | 9.88880000  | 14.30633200 | 2.71932000  | H | 15.03957100 | 15.65291800 | 0.71515900  |
| H  | 11.28156900 | 12.47563800 | 1.76136300  | H | 18.82094900 | 14.49200400 | 0.64419000  |
| H  | 11.09103500 | 11.86834000 | -0.56966000 | H | 17.29549300 | 13.99219600 | 1.40594400  |
| H  | 9.44828400  | 12.81985200 | -2.09828200 | H | 17.82331000 | 16.60290000 | -0.10773500 |
| H  | 8.66136800  | 13.76774500 | -0.74072000 | H | 17.16953300 | 16.45753500 | 1.53177800  |
| H  | 9.13788300  | 10.10817300 | -5.28941200 | O | 13.66194100 | 12.35702800 | -1.73936900 |
| H  | 11.52106800 | 7.77132700  | -2.62435900 | C | 13.15891600 | 11.35656700 | -2.66552400 |
| C  | 12.19918600 | 14.50349300 | -0.09246800 | C | 14.31309000 | 11.65304600 | -0.67250800 |
| H  | 12.37433400 | 15.04159700 | 0.83344200  | C | 13.95600400 | 10.07937400 | -2.38939200 |
| H  | 12.60968000 | 13.51296300 | -0.17595800 | H | 12.08212500 | 11.21223200 | -2.48050200 |
| H  | 11.26968100 | 14.70539200 | -0.60990900 | H | 13.30644700 | 11.75542400 | -3.67369700 |
| F  | 13.24206800 | 15.25941400 | -1.13664100 | C | 15.01217700 | 10.50734000 | -1.36863400 |
| Mg | 14.45626900 | 14.26345300 | -2.41648900 | H | 14.96474600 | 12.36797500 | -0.15649800 |
| Br | 16.15654500 | 13.18728100 | -3.87476200 | H | 13.54955900 | 11.29481300 | 0.04071800  |
| O  | 14.86936200 | 16.23030700 | -3.16052100 | H | 14.40168600 | 9.67530000  | -3.30268000 |
| C  | 16.12527300 | 16.67213000 | -3.70750500 | H | 13.29080300 | 9.31465400  | -1.97057900 |
| C  | 13.87103200 | 17.25514600 | -3.30390100 | H | 15.90747700 | 10.88165700 | -1.88108000 |
| C  | 15.97530100 | 18.17374000 | -3.83224900 | H | 15.29736000 | 9.70377200  | -0.68326900 |
| H  | 16.92356300 | 16.34435500 | -3.03175600 | O | 12.87834400 | 14.27271200 | -3.81334200 |
| H  | 16.28157500 | 16.18217500 | -4.67860800 | C | 11.48201800 | 14.19258800 | -3.46530100 |
| C  | 14.50279900 | 18.29724800 | -4.20735200 | C | 13.04411700 | 14.26316200 | -5.24533700 |
| H  | 12.96227500 | 16.79239500 | -3.70756800 | C | 10.78920600 | 13.77055100 | -4.74219600 |
| H  | 13.63926400 | 17.65768200 | -2.30795400 | H | 11.36867400 | 13.48752600 | -2.63690500 |
| H  | 16.65813000 | 18.60652200 | -4.56851200 | H | 11.14831900 | 15.18376300 | -3.11770500 |
| H  | 16.16122600 | 18.65855800 | -2.86355500 | C | 11.64550000 | 14.46888400 | -5.79579400 |
| H  | 14.35958900 | 18.02942700 | -5.26278700 | H | 13.77169600 | 15.04390300 | -5.50076800 |
| H  | 14.08697600 | 19.29656700 | -4.05146300 | H | 13.46984000 | 13.29668300 | -5.54805600 |
| O  | 15.88572300 | 14.60154300 | -0.84731800 | H | 9.73522600  | 14.06230600 | -4.76010800 |
| C  | 17.20496000 | 14.02719100 | -0.74605400 | H | 10.83676500 | 12.67823400 | -4.85533800 |
| C  | 15.81203200 | 15.80232200 | -0.04918000 | H | 11.39874900 | 15.53911100 | -5.83526200 |
| C  | 17.73184700 | 14.55367200 | 0.56917300  | H | 11.52980600 | 14.05625100 | -6.80179600 |
| H  | 17.10576000 | 12.93961900 | -0.80805400 | C | 10.67756900 | 8.84308400  | -0.28383400 |
| H  | 17.80980400 | 14.35473800 | -1.60264000 | H | 11.17352200 | 9.68771200  | 0.21947200  |
| C  | 17.19879300 | 15.98120600 | 0.54772900  | H | 9.83563800  | 8.56226800  | 0.36118500  |
| H  | 15.49944700 | 16.63115900 | -0.69606600 | H | 11.38412000 | 8.00355700  | -0.30234100 |

|   |             |             |             |
|---|-------------|-------------|-------------|
| H | 8.12671800  | 11.28266000 | -3.35099100 |
| F | 10.95048500 | 8.25737400  | -5.08880000 |

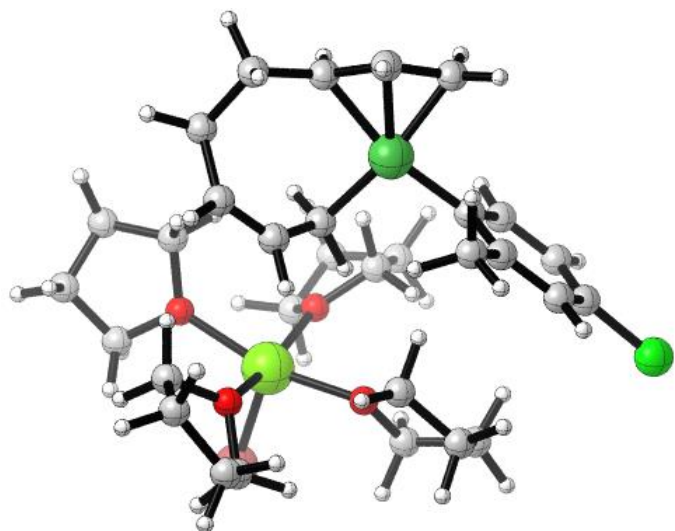

|    |             |             |             |
|----|-------------|-------------|-------------|
| H  | 8.10990300  | 11.59102900 | 1.05505200  |
| H  | 9.28908200  | 14.45113100 | 1.04507600  |
| H  | 9.86830700  | 11.83713300 | 2.56037700  |
| H  | 9.78281800  | 13.45640100 | 3.25404200  |
| H  | 11.83042300 | 14.07052800 | 1.88069700  |
| H  | 12.08837500 | 12.94901900 | 3.21272200  |
| H  | 12.60708100 | 11.11185400 | 1.74526400  |
| H  | 12.42130800 | 11.18353000 | -0.61199200 |
| H  | 11.83044700 | 13.10814400 | -1.89832000 |
| H  | 11.60741200 | 14.12227200 | -0.42817300 |
| H  | 8.87670100  | 14.25654900 | -5.62968600 |
| H  | 8.92703500  | 10.02303200 | -4.94207900 |
| Mg | 14.47922400 | 13.60618500 | -2.48799200 |
| Br | 16.54225800 | 14.10119200 | -3.71965800 |
| O  | 13.34826900 | 15.29654200 | -2.91055100 |
| C  | 14.00129300 | 16.57188800 | -3.10320800 |
| C  | 11.93864700 | 15.40441800 | -3.22786700 |
| C  | 12.86581800 | 17.56749800 | -3.21334100 |

**INT1-4-chloro-2-methylphenyl**

|    |             |             |             |
|----|-------------|-------------|-------------|
| Ni | 9.51784500  | 12.83782800 | -0.78443200 |
| C  | 7.58417000  | 12.98477700 | -0.51661300 |
| C  | 8.23085600  | 12.61360400 | 0.68036600  |
| C  | 9.31901500  | 13.35939200 | 1.16823800  |
| C  | 10.09791200 | 12.89530300 | 2.35977300  |
| C  | 11.62703400 | 13.03927400 | 2.21947200  |
| C  | 12.20724900 | 12.02075400 | 1.29041700  |
| C  | 12.07203000 | 12.06515800 | -0.05524900 |
| C  | 11.46599200 | 13.11995300 | -0.86127000 |
| C  | 9.25779700  | 12.56540800 | -2.64063000 |
| C  | 9.12105000  | 13.61169900 | -3.56714500 |
| C  | 8.96656400  | 13.41770600 | -4.94160800 |
| C  | 8.91777100  | 12.11771700 | -5.41900300 |
| C  | 8.99654300  | 11.03771100 | -4.54848800 |
| C  | 9.16663700  | 11.26019200 | -3.18080300 |
| H  | 7.37491700  | 14.03759000 | -0.72787900 |
| H  | 6.86318700  | 12.29678900 | -0.95467500 |

|   |             |             |             |
|---|-------------|-------------|-------------|
| H | 14.68378200 | 16.73048500 | -2.25917300 |
| H | 14.60164800 | 16.52115800 | -4.02221800 |
| C | 11.80606600 | 16.73764100 | -3.93030900 |
| H | 11.64697700 | 14.53356900 | -3.82548300 |
| H | 11.37044600 | 15.37526800 | -2.28783400 |
| H | 13.15724300 | 18.47412700 | -3.75078700 |
| H | 12.50905300 | 17.85760000 | -2.21569100 |
| H | 12.05514000 | 16.64174000 | -4.99579200 |
| H | 10.79429000 | 17.14581300 | -3.85176100 |
| O | 15.01769600 | 14.51791100 | -0.68929400 |
| C | 16.39136000 | 14.76669300 | -0.31805100 |
| C | 14.12631200 | 15.03529100 | 0.32712000  |
| C | 16.33218400 | 15.00043800 | 1.17465300  |
| H | 16.98909800 | 13.90792600 | -0.63901900 |
| H | 16.75270900 | 15.64886000 | -0.86594500 |
| C | 15.02256000 | 15.76911700 | 1.30669900  |
| H | 13.38064500 | 15.67369900 | -0.16454900 |

|   |             |             |             |
|---|-------------|-------------|-------------|
| H | 13.61711200 | 14.17762700 | 0.78837800  |
| H | 17.20313700 | 15.54512500 | 1.54946500  |
| H | 16.26749000 | 14.04141500 | 1.70677800  |
| H | 15.16590400 | 16.81319700 | 0.99806200  |
| H | 14.60888000 | 15.76761000 | 2.31918200  |
| O | 15.02617700 | 11.75626000 | -1.69486600 |
| C | 15.71734600 | 10.80452900 | -2.52052900 |
| C | 15.36183700 | 11.39702900 | -0.34712300 |
| C | 15.47036100 | 9.47718000  | -1.82036400 |
| H | 15.31532700 | 10.89077100 | -3.53581700 |
| H | 16.78300600 | 11.07852900 | -2.54763500 |
| C | 15.31150300 | 9.87093300  | -0.33684100 |
| H | 16.37662700 | 11.77018800 | -0.13067500 |
| H | 14.63077800 | 11.87260600 | 0.31665600  |
| H | 16.28768300 | 8.77076400  | -1.99125700 |
| H | 14.55093900 | 9.01323500  | -2.19517100 |
| H | 16.09911900 | 9.45216000  | 0.29638500  |
| H | 14.35113100 | 9.52232400  | 0.05839400  |
| O | 13.43194400 | 12.57241000 | -3.95612400 |
| C | 12.54285100 | 11.42558300 | -3.86470900 |
| C | 13.61094100 | 12.94496700 | -5.34610300 |
| C | 12.40488300 | 10.92982000 | -5.28768400 |
| H | 12.98729600 | 10.70777700 | -3.16316700 |
| H | 11.57856900 | 11.76438600 | -3.46308000 |
| C | 12.49157100 | 12.23411300 | -6.07193000 |
| H | 13.59486700 | 14.04046400 | -5.40105200 |
| H | 14.60358800 | 12.60286400 | -5.67202300 |
| H | 11.45966500 | 10.39939300 | -5.44049900 |
| H | 13.23586500 | 10.26253300 | -5.55697900 |
| H | 11.54566600 | 12.78480600 | -5.97237400 |
| H | 12.70044100 | 12.09491500 | -7.13618300 |
| C | 9.28001900  | 10.08052900 | -2.25815400 |
| H | 10.23929900 | 10.09414000 | -1.71945100 |
| H | 8.49960500  | 10.11038000 | -1.48580500 |
| H | 9.19712800  | 9.12328500  | -2.78762000 |

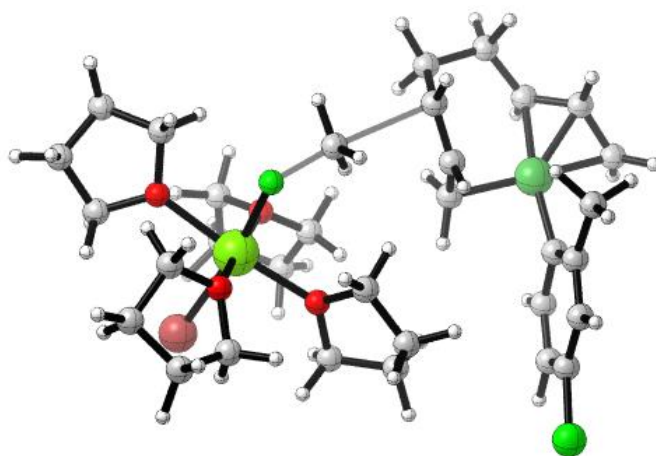

**TS3-4-chloro-2-methylphenyl**

|    |             |             |             |
|----|-------------|-------------|-------------|
| Ni | 7.87026500  | 11.83904000 | -0.67231700 |
| C  | 6.26571500  | 10.96814900 | 0.02807700  |
| C  | 6.91965500  | 11.69395800 | 1.04818700  |
| C  | 7.26988500  | 13.04402000 | 0.86574500  |
| C  | 8.17985000  | 13.73076300 | 1.84483800  |
| C  | 9.54057600  | 14.22824000 | 1.28932000  |
| C  | 10.35222500 | 13.12821200 | 0.68793600  |
| C  | 9.97112300  | 12.58613600 | -0.53379200 |
| C  | 9.08204200  | 13.15888800 | -1.48568400 |
| C  | 8.15632900  | 10.60957400 | -2.09537300 |
| C  | 7.77613400  | 10.89764400 | -3.41480600 |
| C  | 8.15517400  | 10.12700700 | -4.51338400 |
| C  | 8.96436400  | 9.02516000  | -4.28946600 |
| C  | 9.34172500  | 8.66560200  | -3.00277200 |
| C  | 8.92797200  | 9.43915000  | -1.91400500 |
| H  | 5.46462300  | 11.43905900 | -0.54815700 |
| H  | 6.15619200  | 9.89127700  | 0.13636200  |
| H  | 7.45336100  | 11.13875800 | 1.82789800  |
| H  | 6.57739800  | 13.69120000 | 0.31524900  |

|    |             |             |             |   |             |             |             |
|----|-------------|-------------|-------------|---|-------------|-------------|-------------|
| H  | 8.40827800  | 13.03145800 | 2.66419600  | H | 14.58827400 | 14.05233600 | -5.82248700 |
| H  | 7.66186700  | 14.58441200 | 2.30768600  | C | 17.16844200 | 14.70936000 | -4.64692800 |
| H  | 9.35396500  | 15.02194300 | 0.54398800  | H | 16.23926200 | 15.56212800 | -2.82707300 |
| H  | 10.08412700 | 14.71218100 | 2.11421400  | H | 16.75115400 | 13.86093700 | -2.69066100 |
| H  | 10.89728900 | 12.48187400 | 1.38156800  | H | 16.83218700 | 13.53748600 | -6.47986400 |
| H  | 10.51128100 | 11.69074200 | -0.86403600 | H | 17.13398700 | 12.57808500 | -5.02090000 |
| H  | 9.24612600  | 12.92427600 | -2.53985500 | H | 16.91374700 | 15.62696600 | -5.19421700 |
| H  | 8.73375200  | 14.17890000 | -1.30297900 | H | 18.24701800 | 14.69200200 | -4.46581500 |
| H  | 7.85165700  | 10.38796000 | -5.52556500 | O | 12.20729300 | 13.75601700 | -4.09517200 |
| H  | 9.96024900  | 7.78164600  | -2.85060500 | C | 11.56801000 | 13.61151300 | -5.38661000 |
| C  | 12.25498200 | 14.13994100 | -0.57794500 | C | 12.21163900 | 12.47332600 | -3.41441100 |
| H  | 12.43284300 | 14.71316800 | 0.32562800  | C | 10.73832200 | 12.35439000 | -5.26026300 |
| H  | 12.56819900 | 13.10659300 | -0.56290400 | H | 11.00161000 | 14.52635600 | -5.58789000 |
| H  | 11.39797600 | 14.41479000 | -1.17974500 | H | 12.34678600 | 13.52126300 | -6.15798400 |
| F  | 13.45358400 | 14.72026600 | -1.56648100 | C | 11.63283200 | 11.47333100 | -4.39696400 |
| Mg | 13.30376300 | 15.44904600 | -3.40599000 | H | 13.24135400 | 12.26144800 | -3.09978500 |
| Br | 13.41858300 | 16.57686200 | -5.62151100 | H | 11.57351100 | 12.56968700 | -2.52945400 |
| O  | 14.45624800 | 17.07072800 | -2.49022200 | H | 10.49691200 | 11.90374400 | -6.22780100 |
| C  | 15.23458500 | 18.08362000 | -3.16613400 | H | 9.79323500  | 12.55597500 | -4.73672100 |
| C  | 14.51331700 | 17.27393100 | -1.06303200 | H | 12.42134600 | 11.01393500 | -5.00837200 |
| C  | 16.05474200 | 18.73340400 | -2.07114100 | H | 11.07823200 | 10.67230900 | -3.89312100 |
| H  | 15.81673500 | 17.59812600 | -3.95576900 | O | 11.51672800 | 16.49720900 | -2.76269400 |
| H  | 14.54879000 | 18.79431900 | -3.64895100 | C | 10.19556400 | 16.07712200 | -3.14212300 |
| C  | 15.09665400 | 18.66062400 | -0.88902800 | C | 11.45378500 | 17.93132600 | -2.78348000 |
| H  | 13.50386600 | 17.14709900 | -0.65708900 | C | 9.80099000  | 17.00640700 | -4.28162400 |
| H  | 15.15909300 | 16.49944600 | -0.62538000 | H | 10.23804400 | 15.01145400 | -3.38754800 |
| H  | 16.36629700 | 19.74943700 | -2.32857900 | H | 9.53430400  | 16.19819300 | -2.26934000 |
| H  | 16.95692600 | 18.14147400 | -1.86315200 | C | 10.61211000 | 18.28726800 | -4.00551700 |
| H  | 14.31192500 | 19.42290500 | -0.98917200 | H | 10.97836600 | 18.26374200 | -1.84719200 |
| H  | 15.57818900 | 18.79462700 | 0.08368800  | H | 12.48014400 | 18.30513200 | -2.81806900 |
| O  | 15.04909800 | 14.22235000 | -3.82172400 | H | 8.72062500  | 17.17634000 | -4.30215900 |
| C  | 15.16850500 | 13.50198400 | -5.07089100 | H | 10.09435200 | 16.58168400 | -5.24815500 |
| C  | 16.35021500 | 14.62178300 | -3.37745500 | H | 9.97766900  | 19.15727900 | -3.81066800 |
| C  | 16.65402900 | 13.48820000 | -5.40227000 | H | 11.26340600 | 18.51072900 | -4.85607500 |
| H  | 14.73608300 | 12.50137700 | -4.93702400 | C | 9.30940600  | 8.99356000  | -0.52833200 |

|    |            |             |             |
|----|------------|-------------|-------------|
| H  | 9.86381900 | 9.76778900  | 0.01971500  |
| H  | 8.41349400 | 8.78190200  | 0.07019500  |
| H  | 9.92325300 | 8.08499900  | -0.54183500 |
| H  | 7.17053200 | 11.78672800 | -3.60671700 |
| Cl | 9.55994500 | 8.08885400  | -5.66315900 |

|   |             |             |             |
|---|-------------|-------------|-------------|
| H | 7.37021000  | 13.98615600 | -0.68706900 |
| H | 6.89281300  | 12.24058000 | -0.94770500 |
| H | 8.15219300  | 11.52184700 | 1.05248700  |
| H | 9.27448700  | 14.40499100 | 1.08516300  |
| H | 9.89446800  | 11.79200200 | 2.58372200  |
| H | 9.78757800  | 13.40717300 | 3.28408900  |
| H | 11.82733800 | 14.05396000 | 1.91037700  |
| H | 12.10149400 | 12.92870600 | 3.23668200  |
| H | 12.61834500 | 11.09735800 | 1.75618600  |
| H | 12.43357300 | 11.18744700 | -0.59904100 |
| H | 11.84527600 | 13.12307200 | -1.87320600 |
| H | 11.61372800 | 14.12593400 | -0.39617300 |
| H | 8.88202000  | 14.52534100 | -5.49287700 |
| H | 8.90060900  | 10.25915200 | -5.08153600 |

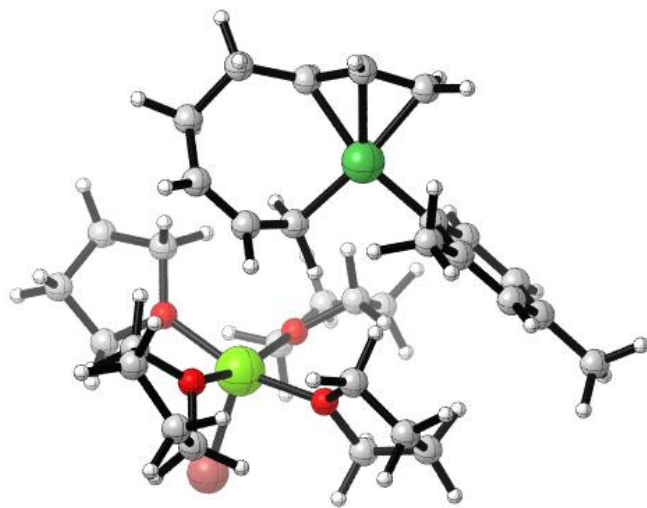

|    |             |             |             |
|----|-------------|-------------|-------------|
| Mg | 14.46691100 | 13.60388800 | -2.47693300 |
| Br | 16.51561600 | 14.09567600 | -3.73699500 |
| O  | 13.33480000 | 15.28811700 | -2.90103200 |
| C  | 13.97100900 | 16.56876800 | -3.10486200 |
| C  | 11.93393100 | 15.36189200 | -3.26557800 |
| C  | 12.82113800 | 17.54255200 | -3.25605700 |
| H  | 14.63469700 | 16.75284500 | -2.25088800 |
| H  | 14.58972400 | 16.51250400 | -4.01156100 |
| C  | 11.79488800 | 16.68341300 | -3.98809900 |
| H  | 11.68178200 | 14.47863800 | -3.86113500 |
| H  | 11.33343300 | 15.32745900 | -2.34660700 |
| H  | 13.10959900 | 18.44742000 | -3.79819900 |
| H  | 12.43452700 | 17.83826000 | -2.27133800 |
| H  | 12.07246200 | 16.57935800 | -5.04583900 |
| H  | 10.77290300 | 17.07068300 | -3.94040600 |
| O  | 15.01831800 | 14.52282400 | -0.68602700 |
| C  | 16.39471700 | 14.77946700 | -0.33258500 |
| C  | 14.13579800 | 15.04190700 | 0.33790200  |
| C  | 16.35241900 | 15.02314000 | 1.15916900  |
| H  | 16.99212300 | 13.92063400 | -0.65430100 |
| H  | 16.74616600 | 15.65928700 | -0.89077000 |

**INT1-2,4-dimethylphenyl**

|    |             |             |             |
|----|-------------|-------------|-------------|
| Ni | 9.53459100  | 12.82775100 | -0.76520300 |
| C  | 7.59997400  | 12.93384100 | -0.49572300 |
| C  | 8.25299000  | 12.55292200 | 0.69541700  |
| C  | 9.32420800  | 13.31271700 | 1.19798900  |
| C  | 10.10929900 | 12.85406400 | 2.38705700  |
| C  | 11.63651800 | 13.01894500 | 2.24496800  |
| C  | 12.22317100 | 12.01181600 | 1.30829600  |
| C  | 12.08572700 | 12.06642300 | -0.03723500 |
| C  | 11.48053600 | 13.12565600 | -0.83646200 |
| C  | 9.26775400  | 12.64153000 | -2.63441500 |
| C  | 9.13106000  | 13.74270100 | -3.49222600 |
| C  | 8.96328600  | 13.62796600 | -4.87416000 |
| C  | 8.88833200  | 12.37374300 | -5.47540100 |
| C  | 8.98003800  | 11.25736900 | -4.63777700 |
| C  | 9.16774200  | 11.37642200 | -3.26086200 |



|    |             |             |             |   |             |             |             |
|----|-------------|-------------|-------------|---|-------------|-------------|-------------|
| C  | 10.88363600 | 8.57409700  | -2.62139400 | H | 14.11358200 | 19.32600300 | -3.96463400 |
| C  | 10.25949500 | 9.22930200  | -1.55835800 | O | 15.85329800 | 14.54724200 | -0.86666900 |
| H  | 6.37408100  | 10.13464700 | -0.32903800 | C | 17.15881000 | 13.94252900 | -0.76145400 |
| H  | 7.47226400  | 8.80211500  | 0.27298200  | C | 15.79864700 | 15.74193900 | -0.05805700 |
| H  | 8.32656900  | 10.23453000 | 2.09338500  | C | 17.69517000 | 14.45751800 | 0.55478600  |
| H  | 6.76351100  | 12.54524900 | 0.75764000  | H | 17.03387400 | 12.85672900 | -0.82143700 |
| H  | 8.72228400  | 12.23206800 | 3.07730900  | H | 17.77178400 | 14.25545300 | -1.61772000 |
| H  | 7.56464300  | 13.53715600 | 2.84268800  | C | 17.18910300 | 15.89490400 | 0.53619900  |
| H  | 9.04902200  | 14.59117100 | 1.16180600  | H | 15.49497500 | 16.58016200 | -0.69689300 |
| H  | 9.85348100  | 14.35203900 | 2.70673800  | H | 15.02671600 | 15.59696500 | 0.70790900  |
| H  | 11.25919900 | 12.52046300 | 1.76663900  | H | 18.78293000 | 14.37510900 | 0.62961600  |
| H  | 11.07750500 | 11.89360800 | -0.55924000 | H | 17.24853200 | 13.90329300 | 1.39098800  |
| H  | 9.43573100  | 12.81552600 | -2.10147700 | H | 17.82365300 | 16.50600900 | -0.11959400 |
| H  | 8.63795300  | 13.77624900 | -0.75830700 | H | 17.17037100 | 16.37008800 | 1.52105800  |
| H  | 9.36732400  | 10.09666200 | -5.22448200 | O | 13.62607600 | 12.35986100 | -1.77973200 |
| H  | 11.62855200 | 7.80083100  | -2.40671800 | C | 13.11595800 | 11.37215500 | -2.71500600 |
| C  | 12.18661200 | 14.51994400 | -0.11383200 | C | 14.26998700 | 11.62118900 | -0.73356000 |
| H  | 12.36305800 | 15.06292900 | 0.80892300  | C | 14.00965700 | 10.13815200 | -2.56026400 |
| H  | 12.59252100 | 13.52597800 | -0.18926900 | H | 12.06881600 | 11.15155300 | -2.45231400 |
| H  | 11.25514000 | 14.71833800 | -0.62910200 | H | 13.15212100 | 11.82764300 | -3.70886900 |
| F  | 13.22595400 | 15.26657100 | -1.16130700 | C | 15.01362600 | 10.52723900 | -1.46854100 |
| Mg | 14.43033000 | 14.25568800 | -2.44691000 | H | 14.89122200 | 12.32421100 | -0.16631100 |
| Br | 16.12542000 | 13.20494900 | -3.93325400 | H | 13.49784300 | 11.20884300 | -0.06002500 |
| O  | 14.85967100 | 16.22833100 | -3.15893400 | H | 14.51234200 | 9.88159600  | -3.49768000 |
| C  | 16.12002000 | 16.66877100 | -3.69567700 | H | 13.39684100 | 9.28212200  | -2.25372200 |
| C  | 13.87099700 | 17.26520800 | -3.27960100 | H | 15.92240500 | 10.94241300 | -1.92358100 |
| C  | 15.98862300 | 18.17494000 | -3.77726300 | H | 15.28690100 | 9.69088900  | -0.81837600 |
| H  | 16.91385300 | 16.30903300 | -3.03096500 | O | 12.84834400 | 14.29502000 | -3.83872600 |
| H  | 16.26821200 | 16.20453300 | -4.68063600 | C | 11.45322700 | 14.20762300 | -3.48536200 |
| C  | 14.51780000 | 18.32686500 | -4.14941000 | C | 13.00843400 | 14.30283100 | -5.27121100 |
| H  | 12.96116500 | 16.82241300 | -3.70326900 | C | 10.75722300 | 13.78980600 | -4.76171800 |
| H  | 13.63500100 | 17.63732500 | -2.27313100 | H | 11.34433200 | 13.49719500 | -2.66059600 |
| H  | 16.67655000 | 18.62026100 | -4.50124800 | H | 11.11821500 | 15.19600500 | -3.13142400 |
| H  | 16.18019500 | 18.63030200 | -2.79545400 | C | 11.60536100 | 14.49852700 | -5.81508000 |
| H  | 14.37349200 | 18.09215500 | -5.21256400 | H | 13.72544900 | 15.09516200 | -5.52162100 |



|   |             |             |             |   |             |             |             |
|---|-------------|-------------|-------------|---|-------------|-------------|-------------|
| H | 13.44591800 | 13.34501900 | -5.58459700 | C | 12.19975400 | 12.01032000 | 1.32094500  |
| H | 9.70223500  | 14.07818600 | -4.77318000 | C | 12.06109700 | 12.06634300 | -0.02435800 |
| H | 10.80599500 | 12.69768100 | -4.87938000 | C | 11.48120300 | 13.13962100 | -0.82349000 |
| H | 11.34949400 | 15.56674100 | -5.84953500 | C | 9.25907800  | 12.64830800 | -2.60867400 |
| H | 11.48947000 | 14.08953900 | -6.82259800 | C | 9.12897400  | 13.69362400 | -3.52881700 |
| C | 10.67922300 | 8.88575900  | -0.15479300 | C | 8.98300000  | 13.51328200 | -4.91228500 |
| H | 11.08290200 | 9.76171400  | 0.37590300  | C | 8.93236200  | 12.21875900 | -5.41594500 |
| H | 9.82970000  | 8.53738100  | 0.44682900  | C | 8.99667300  | 11.14179900 | -4.52996400 |
| H | 11.44693400 | 8.10115600  | -0.13687600 | C | 9.15854600  | 11.34778100 | -3.16295000 |
| H | 8.23470700  | 11.24065500 | -3.37165700 | H | 7.40772000  | 14.13958800 | -0.67803800 |
| C | 11.30372900 | 8.15918100  | -5.06887500 | H | 6.86490800  | 12.41011000 | -0.92012300 |
| H | 12.39266100 | 8.16337800  | -4.92242400 | H | 8.09624200  | 11.66386300 | 1.08380500  |
| H | 11.00021400 | 7.10619000  | -5.13955700 | H | 9.32980300  | 14.50121000 | 1.10125900  |
| H | 11.09589100 | 8.62422300  | -6.03935300 | H | 9.86089600  | 11.86293100 | 2.59093300  |

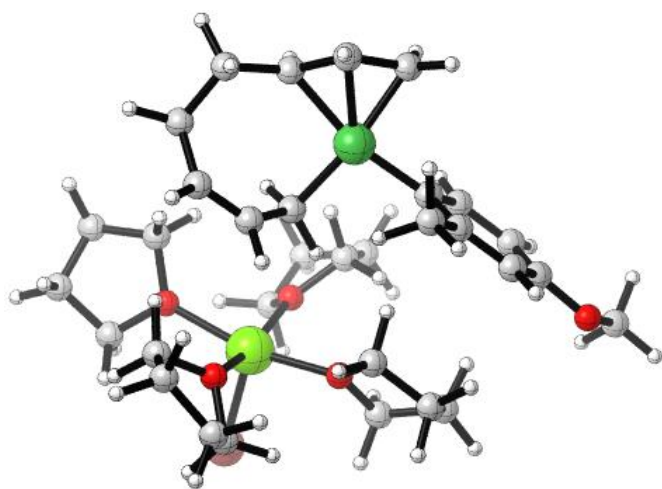

**INT1-4-methoxy-2-methylphenyl**

|    |             |             |             |    |             |             |             |
|----|-------------|-------------|-------------|----|-------------|-------------|-------------|
| Ni | 9.52605600  | 12.89956100 | -0.74452000 | C  | 12.19975400 | 12.01032000 | 1.32094500  |
| C  | 7.59717500  | 13.08141300 | -0.47500700 | C  | 12.06109700 | 12.06634300 | -0.02435800 |
| C  | 8.23673600  | 12.68750400 | 0.71861200  | C  | 11.48120300 | 13.13962100 | -0.82349000 |
| C  | 9.33973000  | 13.40770400 | 1.21285200  | C  | 9.25907800  | 12.64830800 | -2.60867400 |
| C  | 10.11039000 | 12.91838900 | 2.39969200  | C  | 9.12897400  | 13.69362400 | -3.52881700 |
| C  | 11.64206100 | 13.03399000 | 2.25811100  | C  | 8.98300000  | 13.51328200 | -4.91228500 |
|    |             |             |             | C  | 8.93236200  | 12.21875900 | -5.41594500 |
|    |             |             |             | C  | 8.99667300  | 11.14179900 | -4.52996400 |
|    |             |             |             | C  | 9.15854600  | 11.34778100 | -3.16295000 |
|    |             |             |             | H  | 7.40772000  | 14.13958800 | -0.67803800 |
|    |             |             |             | H  | 6.86490800  | 12.41011000 | -0.92012300 |
|    |             |             |             | H  | 8.09624200  | 11.66386300 | 1.08380500  |
|    |             |             |             | H  | 9.32980300  | 14.50121000 | 1.10125900  |
|    |             |             |             | H  | 9.86089600  | 11.86293100 | 2.59093300  |
|    |             |             |             | H  | 9.80738600  | 13.47719900 | 3.29979900  |
|    |             |             |             | H  | 11.86423400 | 14.06333800 | 1.92528900  |
|    |             |             |             | H  | 12.10345100 | 12.92867800 | 3.25002900  |
|    |             |             |             | H  | 12.57603000 | 11.08730600 | 1.76772700  |
|    |             |             |             | H  | 12.38301800 | 11.17722700 | -0.58443500 |
|    |             |             |             | H  | 11.83749800 | 13.12345100 | -1.86387500 |
|    |             |             |             | H  | 11.64624400 | 14.13522800 | -0.38383100 |
|    |             |             |             | H  | 8.90309300  | 14.37885200 | -5.56737700 |
|    |             |             |             | H  | 8.91931600  | 10.13467100 | -4.94368600 |
|    |             |             |             | Mg | 14.44754000 | 13.63223200 | -2.47202300 |
|    |             |             |             | Br | 16.50722500 | 14.14628400 | -3.71385400 |
|    |             |             |             | O  | 13.33612700 | 15.34785300 | -2.82327100 |
|    |             |             |             | C  | 14.00017100 | 16.62056500 | -2.99217200 |
|    |             |             |             | C  | 11.92133100 | 15.47996500 | -3.11181500 |
|    |             |             |             | C  | 12.87436500 | 17.63103800 | -3.06076300 |
|    |             |             |             | H  | 14.69545700 | 16.75105800 | -2.15377800 |
|    |             |             |             | H  | 14.58859700 | 16.58647500 | -3.91974100 |
|    |             |             |             | C  | 11.79358000 | 16.83087500 | -3.78000500 |
|    |             |             |             | H  | 11.60593400 | 14.62761100 | -3.72316100 |
|    |             |             |             | H  | 11.36885700 | 15.43496900 | -2.16313700 |
|    |             |             |             | H  | 13.16806500 | 18.54744300 | -3.58018200 |

|   |             |             |             |
|---|-------------|-------------|-------------|
| H | 12.53672700 | 17.90020000 | -2.05068000 |
| H | 12.02464900 | 16.75799000 | -4.85155300 |
| H | 10.78793000 | 17.24824700 | -3.67519400 |
| O | 15.04113700 | 14.49162600 | -0.65666900 |
| C | 16.42287500 | 14.72564700 | -0.31035900 |
| C | 14.17430500 | 14.99670900 | 0.38673000  |
| C | 16.39783000 | 14.93075800 | 1.18769800  |
| H | 17.00789000 | 13.87036900 | -0.66278700 |
| H | 16.77802800 | 15.61689100 | -0.84767400 |
| C | 15.09574000 | 15.70369800 | 1.36298400  |
| H | 13.42506500 | 15.65180400 | -0.07704900 |
| H | 13.66512300 | 14.13487100 | 0.84017900  |
| H | 17.27966600 | 15.46409600 | 1.55343100  |
| H | 16.33961800 | 13.96272700 | 1.70375500  |
| H | 15.23931000 | 16.75337100 | 1.07379000  |
| H | 14.70301800 | 15.68318400 | 2.38358600  |
| O | 14.98989800 | 11.76107400 | -1.72960800 |
| C | 15.67817500 | 10.82586700 | -2.57573400 |
| C | 15.33110300 | 11.37486200 | -0.39001800 |
| C | 15.42929900 | 9.48509500  | -1.90224300 |
| H | 15.27645900 | 10.93387100 | -3.58929800 |
| H | 16.74465100 | 11.09764800 | -2.59797200 |
| C | 15.27951200 | 9.84912700  | -0.41008300 |
| H | 16.34699800 | 11.74350400 | -0.17110800 |
| H | 14.60346800 | 11.83632500 | 0.28766300  |
| H | 16.24295400 | 8.77911900  | -2.09176000 |
| H | 14.50585100 | 9.03305200  | -2.28161800 |
| H | 16.07082100 | 9.41709000  | 0.20957400  |
| H | 14.32111500 | 9.49488000  | -0.01483000 |
| O | 13.40055700 | 12.65235900 | -3.97459200 |
| C | 12.50845800 | 11.50368100 | -3.92496100 |
| C | 13.56661800 | 13.08452500 | -5.34771000 |
| C | 12.33148000 | 11.08672700 | -5.36959900 |
| H | 12.97188200 | 10.74331900 | -3.28392100 |
| H | 11.55767800 | 11.82120400 | -3.47594700 |

|   |             |             |             |
|---|-------------|-------------|-------------|
| C | 12.42414800 | 12.42692200 | -6.08779700 |
| H | 13.56782000 | 14.18140400 | -5.35400200 |
| H | 14.54782700 | 12.73985600 | -5.70454500 |
| H | 11.37249200 | 10.58372200 | -5.52792600 |
| H | 13.14567800 | 10.42172100 | -5.69100900 |
| H | 11.48897600 | 12.98551500 | -5.93738400 |
| H | 12.61385800 | 12.33932300 | -7.16152700 |
| C | 9.25264500  | 10.15947100 | -2.24930500 |
| H | 10.21352200 | 10.15105400 | -1.71291700 |
| H | 8.47556100  | 10.19858500 | -1.47389500 |
| H | 9.15086800  | 9.20785700  | -2.78576800 |
| H | 9.13212100  | 14.72483300 | -3.16167600 |
| O | 8.84514200  | 11.89388600 | -6.74637700 |
| C | 8.70717200  | 12.95315600 | -7.65075300 |
| H | 9.58836600  | 13.61596400 | -7.64979100 |
| H | 8.60134300  | 12.51141000 | -8.64486900 |
| H | 7.81809000  | 13.56491300 | -7.43526000 |

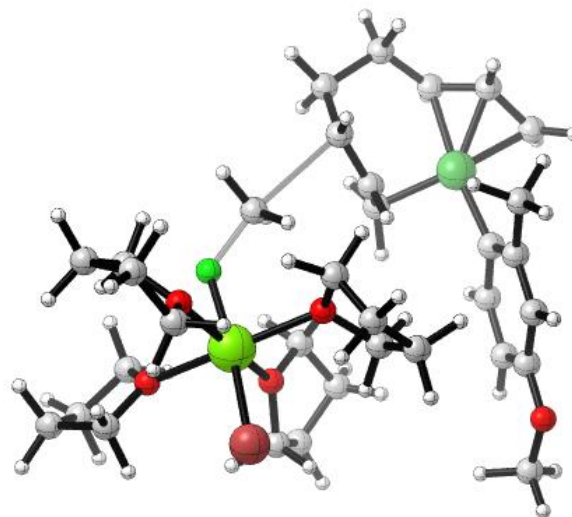

**TS3-4-methoxy-2-methylphenyl**

|    |            |             |             |
|----|------------|-------------|-------------|
| Ni | 8.48663200 | 11.26300700 | -0.31223100 |
| C  | 7.15778500 | 9.93604700  | 0.24126700  |
| C  | 7.60027500 | 10.68564100 | 1.35279600  |

|    |             |             |             |   |             |             |             |
|----|-------------|-------------|-------------|---|-------------|-------------|-------------|
| C  | 7.60366700  | 12.09315100 | 1.32670600  | C | 13.81788500 | 17.20254800 | -3.32730400 |
| C  | 8.33608500  | 12.86309400 | 2.39103700  | C | 15.90790300 | 18.13641800 | -3.88054900 |
| C  | 9.51518400  | 13.75480700 | 1.91702600  | H | 16.87832700 | 16.32189500 | -3.07291100 |
| C  | 10.56571700 | 12.98765500 | 1.18076200  | H | 16.22990300 | 16.14221500 | -4.71559400 |
| C  | 10.28842100 | 12.52018700 | -0.10080900 | C | 14.43132300 | 18.24350200 | -4.24429100 |
| C  | 9.24424200  | 12.95965500 | -0.95897100 | H | 12.90741200 | 16.73108200 | -3.71651800 |
| C  | 9.17964500  | 10.28766700 | -1.80583500 | H | 13.59642600 | 17.61074900 | -2.33120500 |
| C  | 8.93151400  | 10.63052700 | -3.13938600 | H | 16.58082800 | 18.57069100 | -4.62501800 |
| C  | 9.59566400  | 10.06576400 | -4.23627300 | H | 16.09669300 | 18.62965900 | -2.91669100 |
| C  | 10.55956000 | 9.09112500  | -4.00544100 | H | 14.28148700 | 17.96624700 | -5.29638000 |
| C  | 10.80741600 | 8.68237300  | -2.69560100 | H | 14.00752100 | 19.24007400 | -4.09211000 |
| C  | 10.15134900 | 9.27307600  | -1.61717500 | O | 15.87436000 | 14.55610000 | -0.88496000 |
| H  | 6.27201800  | 10.25542200 | -0.31454200 | C | 17.19347700 | 13.98023700 | -0.79555600 |
| H  | 7.32157900  | 8.86040700  | 0.22928800  | C | 15.81399400 | 15.76417500 | -0.09679300 |
| H  | 8.25717000  | 10.19889600 | 2.08259900  | C | 17.73361100 | 14.50955800 | 0.51307200  |
| H  | 6.76472600  | 12.60910500 | 0.84651300  | H | 17.09133900 | 12.89266400 | -0.85328900 |
| H  | 8.75351600  | 12.14699100 | 3.11662700  | H | 17.79050700 | 14.30490900 | -1.65885900 |
| H  | 7.63176800  | 13.49396800 | 2.95468000  | C | 17.20578700 | 15.93909000 | 0.49030600  |
| H  | 9.11709000  | 14.56312100 | 1.28049400  | H | 15.50330800 | 16.59009000 | -0.74874900 |
| H  | 9.93694300  | 14.24945700 | 2.80390000  | H | 15.04548300 | 15.62628900 | 0.67336900  |
| H  | 11.27708600 | 12.41418700 | 1.78465400  | H | 18.82310100 | 14.44429300 | 0.57911000  |
| H  | 11.03175700 | 11.85104200 | -0.55334600 | H | 17.30225400 | 13.95275300 | 1.35548700  |
| H  | 9.39348600  | 12.89012400 | -2.03629800 | H | 17.82865000 | 16.55606600 | -0.17105800 |
| H  | 8.65587200  | 13.82406100 | -0.64174900 | H | 17.18501100 | 16.41869700 | 1.47298100  |
| H  | 9.34861700  | 10.39222100 | -5.24489600 | O | 13.65701500 | 12.31249400 | -1.77052600 |
| H  | 11.54929400 | 7.89739800  | -2.54097300 | C | 13.15097800 | 11.31200500 | -2.69632800 |
| C  | 12.20303700 | 14.45101900 | -0.08037600 | C | 14.29969100 | 11.60250200 | -0.70354400 |
| H  | 12.41185100 | 14.97856400 | 0.84460800  | C | 13.95261500 | 10.03683000 | -2.42495300 |
| H  | 12.59622200 | 13.45495600 | -0.18323700 | H | 12.07633900 | 11.16699700 | -2.50489200 |
| H  | 11.26474100 | 14.67246600 | -0.57294500 | H | 13.29275300 | 11.71108600 | -3.70567100 |
| F  | 13.22885700 | 15.20230500 | -1.14714500 | C | 15.00846900 | 10.46575100 | -1.40488700 |
| Mg | 14.43207300 | 14.21593100 | -2.44115400 | H | 14.94377600 | 12.31504000 | -0.17463000 |
| Br | 16.12569200 | 13.15837500 | -3.92568600 | H | 13.52717300 | 11.23388200 | -0.00390100 |
| O  | 14.82494200 | 16.18537700 | -3.19116700 | H | 14.39187000 | 9.63140500  | -3.34094800 |
| C  | 16.07348800 | 16.63700400 | -3.74707300 | H | 13.29052700 | 9.27223500  | -2.00239000 |

|   |             |             |             |
|---|-------------|-------------|-------------|
| H | 15.90089700 | 10.85014500 | -1.91520300 |
| H | 15.29980000 | 9.66041400  | -0.72413200 |
| O | 12.83408000 | 14.21785400 | -3.81988300 |
| C | 11.44229500 | 14.13056800 | -3.45454000 |
| C | 12.98351800 | 14.20254900 | -5.25258500 |
| C | 10.73797500 | 13.70331100 | -4.72304400 |
| H | 11.33947400 | 13.42467200 | -2.62522600 |
| H | 11.10836000 | 15.12004000 | -3.10214300 |
| C | 11.57822600 | 14.40332000 | -5.78787200 |
| H | 13.70801000 | 14.98260100 | -5.51904500 |
| H | 13.40650300 | 13.23473400 | -5.55676700 |
| H | 9.68122200  | 13.98609100 | -4.72860200 |
| H | 10.79215500 | 12.60986500 | -4.82886400 |
| H | 11.32791600 | 15.47280700 | -5.82673400 |
| H | 11.45277800 | 13.98858700 | -6.79210300 |
| C | 10.54832500 | 8.85061600  | -0.22917800 |
| H | 11.07236400 | 9.66273900  | 0.30037400  |
| H | 9.67361200  | 8.60313600  | 0.38395700  |
| H | 11.21432100 | 7.97855600  | -0.24030000 |
| H | 8.18567100  | 11.40017700 | -3.35504200 |
| O | 11.31971900 | 8.48993000  | -4.97454200 |
| C | 11.20517800 | 8.99816500  | -6.27257100 |
| H | 11.45085500 | 10.07342300 | -6.31243200 |
| H | 11.91676000 | 8.44867800  | -6.89394900 |
| H | 10.19487600 | 8.86260000  | -6.68784000 |

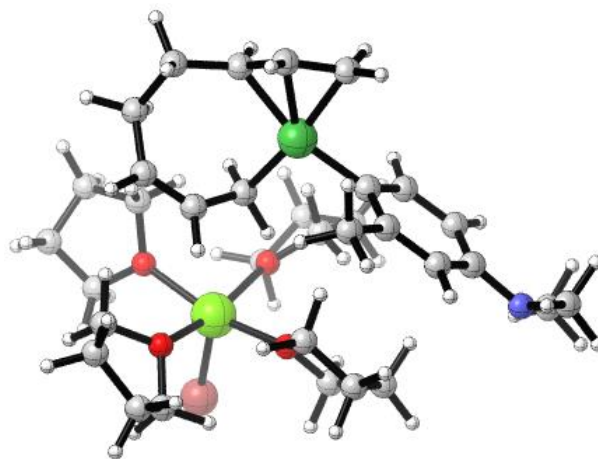

**INT1-2-methy-4-dimethylaminophenyl**

|    |             |             |             |
|----|-------------|-------------|-------------|
| Ni | 9.52448200  | 12.81471800 | -0.69383400 |
| C  | 7.59495300  | 12.90485000 | -0.38624000 |
| C  | 8.27387800  | 12.52536000 | 0.79060100  |
| C  | 9.34921300  | 13.29163100 | 1.27454000  |
| C  | 10.16055400 | 12.83396000 | 2.44642800  |
| C  | 11.68410000 | 13.00321500 | 2.27327200  |
| C  | 12.25297800 | 11.99992100 | 1.32173900  |
| C  | 12.08820200 | 12.05983500 | -0.02061500 |
| C  | 11.46830600 | 13.12265000 | -0.80315900 |
| C  | 9.22590900  | 12.62943100 | -2.56089600 |
| C  | 9.06780700  | 13.72109900 | -3.42105600 |
| C  | 8.87730700  | 13.61389200 | -4.80370100 |
| C  | 8.81867800  | 12.35555900 | -5.40498700 |
| C  | 8.93427100  | 11.23878500 | -4.56347400 |
| C  | 9.12720500  | 11.36537300 | -3.19028200 |
| H  | 7.35418700  | 13.95595800 | -0.57035400 |
| H  | 6.88435300  | 12.20766300 | -0.82667400 |
| H  | 8.18802300  | 11.49242100 | 1.14636400  |
| H  | 9.28914500  | 14.38393200 | 1.16737300  |
| H  | 9.95323600  | 11.77099000 | 2.64635100  |
| H  | 9.85563200  | 13.38484700 | 3.35070100  |
| H  | 11.86533400 | 14.03958300 | 1.93767600  |
| H  | 12.16931600 | 12.91145500 | 3.25514500  |
| H  | 12.65635500 | 11.08350400 | 1.75817100  |

|    |             |             |             |   |             |             |             |
|----|-------------|-------------|-------------|---|-------------|-------------|-------------|
| H  | 12.42352900 | 11.18311900 | -0.59344600 | C | 15.37202100 | 11.41969100 | -0.37866800 |
| H  | 11.81083400 | 13.12314900 | -1.84742500 | C | 15.47955500 | 9.50712100  | -1.86140300 |
| H  | 11.61124900 | 14.12121200 | -0.36181200 | H | 15.28104300 | 10.92579400 | -3.56807300 |
| H  | 8.76462800  | 14.51990400 | -5.39790400 | H | 16.76268000 | 11.12512900 | -2.60331900 |
| H  | 8.89489400  | 10.23872600 | -5.00181900 | C | 15.33282000 | 9.89343800  | -0.37468500 |
| Mg | 14.41805400 | 13.62097100 | -2.49950400 | H | 16.38727700 | 11.79982500 | -0.17612900 |
| Br | 16.43735100 | 14.13582400 | -3.79884400 | H | 14.64704900 | 11.88625900 | 0.29821800  |
| O  | 13.26470100 | 15.29747300 | -2.88358800 | H | 16.30480900 | 8.81300300  | -2.04458300 |
| C  | 13.88465200 | 16.58442900 | -3.09507400 | H | 14.56240200 | 9.03164100  | -2.22715500 |
| C  | 11.85683200 | 15.35757600 | -3.22479000 | H | 16.12902400 | 9.47702300  | 0.24933400  |
| C  | 12.72235800 | 17.54837400 | -3.20747400 | H | 14.37824200 | 9.53715200  | 0.02777300  |
| H  | 14.56938700 | 16.76737800 | -2.25765900 | O | 13.34682400 | 12.56594800 | -3.93549900 |
| H  | 14.47975800 | 16.54008200 | -4.01831600 | C | 12.47095200 | 11.41171600 | -3.80292300 |
| C  | 11.68776000 | 16.68753400 | -3.92570600 | C | 13.47367900 | 12.92740700 | -5.33279300 |
| H  | 11.60707400 | 14.48028400 | -3.83015300 | C | 12.28274200 | 10.90396600 | -5.21536000 |
| H  | 11.27249300 | 15.29835000 | -2.29675000 | H | 12.94872900 | 10.70317700 | -3.11444700 |
| H  | 12.98870600 | 18.46287000 | -3.74475100 | H | 11.51890600 | 11.74848700 | -3.37137200 |
| H  | 12.35649300 | 17.82733500 | -2.21000200 | C | 12.33367000 | 12.20263300 | -6.01158000 |
| H  | 11.94074500 | 16.60068700 | -4.99127800 | H | 13.44530600 | 14.02243000 | -5.39603700 |
| H  | 10.66337900 | 17.06362200 | -3.84842100 | H | 14.45739800 | 12.59223600 | -5.69222900 |
| O  | 15.00526600 | 14.53182800 | -0.71286600 | H | 11.32943300 | 10.37750400 | -5.32716400 |
| C  | 16.38729500 | 14.79591400 | -0.38921100 | H | 13.10334900 | 10.23459200 | -5.51040300 |
| C  | 14.14240600 | 15.04204000 | 0.33196000  | H | 11.38709600 | 12.74369100 | -5.87382900 |
| C  | 16.37688800 | 15.03481600 | 1.10389700  | H | 12.50190700 | 12.05834000 | -7.08248700 |
| H  | 16.98223900 | 13.94181900 | -0.72785200 | C | 9.27252500  | 10.12486800 | -2.35480300 |
| H  | 16.72078800 | 15.67998000 | -0.95176200 | H | 10.22224900 | 10.13229400 | -1.79892800 |
| C  | 15.06384300 | 15.78933500 | 1.27750800  | H | 8.48144300  | 10.06684500 | -1.59442300 |
| H  | 13.37328400 | 15.67049200 | -0.13539000 | H | 9.23316700  | 9.20632500  | -2.95488400 |
| H  | 13.65721100 | 14.18041800 | 0.81168900  | H | 9.08549900  | 14.73162100 | -2.99926900 |
| H  | 17.25388800 | 15.59099400 | 1.44651100  | N | 8.70223400  | 12.16709700 | -6.81002900 |
| H  | 16.34115800 | 14.07742200 | 1.64152700  | C | 8.75197500  | 13.36196200 | -7.61678300 |
| H  | 15.18497500 | 16.83338800 | 0.95911100  | H | 8.78279300  | 13.07876500 | -8.67540300 |
| H  | 14.68554600 | 15.78866100 | 2.30365400  | H | 7.87826600  | 14.02795000 | -7.47279700 |
| O  | 15.01343400 | 11.78155400 | -1.71972400 | H | 9.65689000  | 13.93941400 | -7.39490500 |
| C  | 15.70036200 | 10.84016600 | -2.55988400 | C | 7.61410100  | 11.30404400 | -7.23356200 |

|   |            |             |             |
|---|------------|-------------|-------------|
| H | 7.73857100 | 11.05077100 | -8.29349600 |
| H | 7.60835200 | 10.37099000 | -6.66610200 |
| H | 6.62441400 | 11.78287200 | -7.10825100 |

|   |             |             |             |
|---|-------------|-------------|-------------|
| H | 7.46603700  | 8.84298600  | 0.22863900  |
| H | 8.38781200  | 10.20287000 | 2.07309700  |
| H | 6.75893900  | 12.55416000 | 0.89575800  |
| H | 8.79577100  | 12.16594800 | 3.13371000  |
| H | 7.62749000  | 13.47355300 | 2.98378100  |
| H | 9.05696400  | 14.59707400 | 1.29946400  |
| H | 9.91135400  | 14.29907000 | 2.80702700  |
| H | 11.27828300 | 12.49999900 | 1.75153300  |
| H | 11.02438100 | 11.97458300 | -0.59532500 |
| H | 9.33446500  | 12.97517500 | -2.04010700 |
| H | 8.58289000  | 13.86425900 | -0.62355300 |
| H | 9.09051400  | 10.46704200 | -5.28501900 |
| H | 11.42886400 | 7.93631900  | -2.71768500 |
| C | 12.18495900 | 14.53189800 | -0.09378500 |
| H | 12.40105700 | 15.06024300 | 0.82906200  |
| H | 12.56026900 | 13.52870100 | -0.19193500 |
| H | 11.25148900 | 14.76819200 | -0.58870300 |
| F | 13.22734900 | 15.25694300 | -1.16383000 |

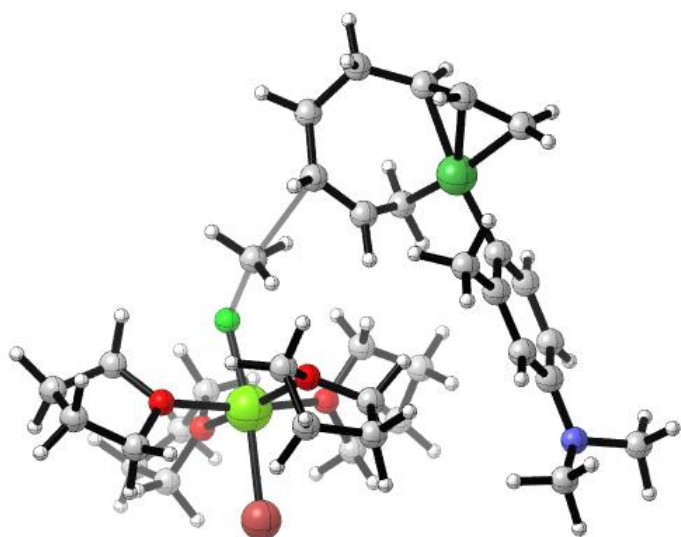

**TS3-2-methy-4-dimethylaminophenyl**

|    |             |             |             |
|----|-------------|-------------|-------------|
| Ni | 8.51044000  | 11.29767300 | -0.31478700 |
| C  | 7.25427200  | 9.90990700  | 0.25692300  |
| C  | 7.69105400  | 10.66716700 | 1.36581100  |
| C  | 7.62950100  | 12.07307300 | 1.35543100  |
| C  | 8.34650000  | 12.86686300 | 2.41233000  |
| C  | 9.48935100  | 13.79742000 | 1.92418000  |
| C  | 10.54849000 | 13.06757500 | 1.16383300  |
| C  | 10.26498300 | 12.60894700 | -0.12078100 |
| C  | 9.19706400  | 13.02563800 | -0.95979800 |
| C  | 9.16525600  | 10.35869800 | -1.84572200 |
| C  | 8.82337500  | 10.71027400 | -3.16189500 |
| C  | 9.38597500  | 10.12647700 | -4.29182600 |
| C  | 10.34259200 | 9.11344400  | -4.16471300 |
| C  | 10.70297300 | 8.73619300  | -2.86786100 |
| C  | 10.14229500 | 9.34764300  | -1.73718900 |
| H  | 6.33986000  | 10.19393000 | -0.27101700 |

|    |             |             |             |
|----|-------------|-------------|-------------|
| Mg | 14.42036400 | 14.20121700 | -2.43001100 |
| Br | 16.10742300 | 13.08407800 | -3.87965900 |
| O  | 14.85841200 | 16.13981500 | -3.20378300 |
| C  | 16.11901500 | 16.55463600 | -3.76023000 |
| C  | 13.87993800 | 17.18519800 | -3.33565800 |
| C  | 16.00250400 | 18.06014800 | -3.87172100 |
| H  | 16.91427200 | 16.19802000 | -3.09571500 |
| H  | 16.25293200 | 16.06986400 | -4.73740300 |
| C  | 14.53007900 | 18.21983000 | -4.23484600 |
| H  | 12.96059900 | 16.74298500 | -3.73892800 |
| H  | 13.65945600 | 17.58202600 | -2.33522700 |
| H  | 16.68900800 | 18.48357900 | -4.61006200 |
| H  | 16.20674300 | 18.53323400 | -2.90093800 |
| H  | 14.37388600 | 17.96314800 | -5.29124700 |
| H  | 14.13825400 | 19.22717100 | -4.06888600 |
| O  | 15.84618000 | 14.51986100 | -0.85771700 |
| C  | 17.13910800 | 13.89315000 | -0.72931600 |

|   |             |             |             |   |             |             |             |
|---|-------------|-------------|-------------|---|-------------|-------------|-------------|
| C | 15.80204700 | 15.72569700 | -0.06620100 | H | 11.35283600 | 15.46483300 | -5.82221100 |
| C | 17.68178100 | 14.43422300 | 0.57395500  | H | 11.48402100 | 13.99216300 | -6.80577800 |
| H | 16.99228300 | 12.80862400 | -0.75823600 | C | 10.61843700 | 8.90348900  | -0.38012000 |
| H | 17.76106300 | 14.16950200 | -1.59160800 | H | 11.04810600 | 9.73937800  | 0.19339300  |
| C | 17.19643400 | 15.87768800 | 0.51725800  | H | 9.79166000  | 8.51648800  | 0.22961800  |
| H | 15.49941300 | 16.55647600 | -0.71465400 | H | 11.38048900 | 8.11572700  | -0.44706300 |
| H | 15.03459500 | 15.59612500 | 0.70739800  | H | 8.07922300  | 11.49546800 | -3.32051100 |
| H | 18.76810500 | 14.33751900 | 0.65236800  | N | 10.91834200 | 8.53670300  | -5.32757800 |
| H | 17.22609100 | 13.90907500 | 1.42411800  | C | 12.03072500 | 7.64304300  | -5.12121700 |
| H | 17.83506600 | 16.46032300 | -0.16032000 | H | 11.74809000 | 6.69002700  | -4.63099800 |
| H | 17.18947700 | 16.38147700 | 1.48794500  | H | 12.47655800 | 7.39625800  | -6.09219600 |
| O | 13.61099800 | 12.32760800 | -1.71359800 | H | 12.80063700 | 8.12495600  | -4.50859800 |
| C | 13.15072000 | 11.30069200 | -2.63321500 | C | 9.97271700  | 7.97929800  | -6.27659800 |
| C | 14.21105500 | 11.64100300 | -0.60776600 | H | 9.15330900  | 8.67599600  | -6.46672900 |
| C | 14.03067500 | 10.07406300 | -2.37547300 | H | 10.47869700 | 7.78505500  | -7.23058500 |
| H | 12.08923400 | 11.09254600 | -2.42410400 | H | 9.53300600  | 7.02769300  | -5.92120300 |
| H | 13.25169100 | 11.70780600 | -3.64335300 |   |             |             |             |
| C | 14.98190300 | 10.51288400 | -1.25623000 |   |             |             |             |
| H | 14.81244500 | 12.37109200 | -0.05306200 |   |             |             |             |
| H | 13.41340700 | 11.26407100 | 0.05607600  |   |             |             |             |
| H | 14.58240600 | 9.77873400  | -3.27305500 |   |             |             |             |
| H | 13.40426400 | 9.22941500  | -2.06317100 |   |             |             |             |
| H | 15.91073100 | 10.90619700 | -1.68889100 |   |             |             |             |
| H | 15.22460900 | 9.70860000  | -0.55556800 |   |             |             |             |
| O | 12.83441200 | 14.19375700 | -3.81616000 |   |             |             |             |
| C | 11.43874100 | 14.08919200 | -3.46622700 |   |             |             |             |
| C | 12.99836200 | 14.18291000 | -5.24823800 |   |             |             |             |
| C | 10.74850100 | 13.68058300 | -4.74909300 |   |             |             |             |
| H | 11.33066400 | 13.36412700 | -2.65338400 |   |             |             |             |
| H | 11.09849400 | 15.07005100 | -3.09716600 |   |             |             |             |
| C | 11.59999500 | 14.39415900 | -5.79545200 |   |             |             |             |
| H | 13.72923600 | 14.96059100 | -5.50375600 |   |             |             |             |
| H | 13.41811300 | 13.21417300 | -5.55283000 |   |             |             |             |
| H | 9.69225300  | 13.96521600 | -4.76152800 |   |             |             |             |
| H | 10.80145200 | 12.58929800 | -4.87147700 |   |             |             |             |

**Table 10**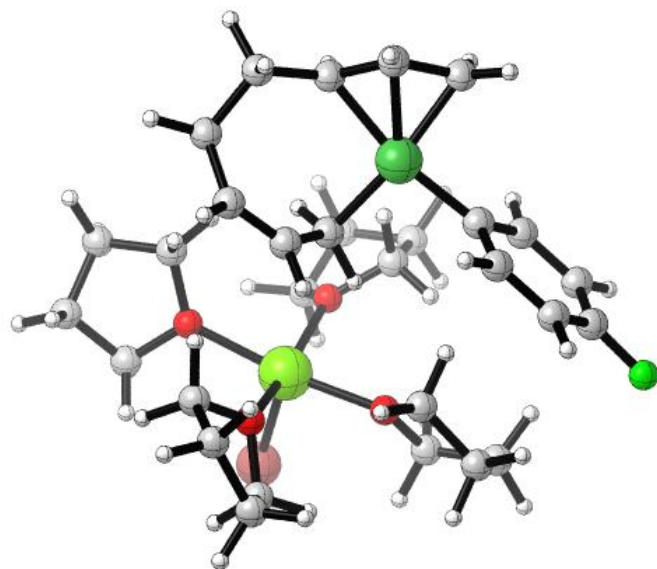**INT1-4-F-Ph**

|    |             |             |             |    |             |             |             |
|----|-------------|-------------|-------------|----|-------------|-------------|-------------|
| Ni | 9.54102800  | 13.05045900 | -0.72757700 | H  | 11.97636800 | 14.16754400 | 1.88289200  |
| C  | 7.63868500  | 13.47660300 | -0.55156400 | H  | 12.01907400 | 13.11144800 | 3.28895000  |
| C  | 8.20447300  | 13.16948700 | 0.70146500  | H  | 12.19879300 | 11.10984300 | 1.95201700  |
| C  | 9.37583200  | 13.81357800 | 1.14625900  | H  | 12.05772200 | 11.06666000 | -0.41646500 |
| C  | 10.06057400 | 13.35596400 | 2.39833700  | H  | 11.87559400 | 12.98010400 | -1.82660900 |
| C  | 11.59234300 | 13.21314000 | 2.28107700  | H  | 11.79230500 | 14.11521200 | -0.41748700 |
| C  | 11.99246400 | 12.04722700 | 1.43293100  | H  | 9.04014000  | 14.37384300 | -3.48335200 |
| C  | 11.88670500 | 12.02996900 | 0.08291100  | H  | 8.91090100  | 13.47285700 | -5.79221100 |
| C  | 11.50712800 | 13.12514900 | -0.79893500 | H  | 9.27505900  | 9.49239300  | -4.28158400 |
| C  | 9.31582700  | 12.46282600 | -2.50886200 | H  | 9.47159800  | 10.37054800 | -1.97272000 |
| C  | 9.12818500  | 13.29311200 | -3.62894400 | Mg | 14.34979900 | 13.70018900 | -2.48388300 |
| C  | 9.04296500  | 12.81129400 | -4.93728400 | Br | 16.33941300 | 14.39573900 | -3.76089500 |
| C  | 9.11396100  | 11.44427100 | -5.14231600 | O  | 13.15719900 | 15.37475800 | -2.67841000 |
| C  | 9.24289100  | 10.56245400 | -4.08302700 | C  | 13.75183400 | 16.68693000 | -2.78326000 |
| C  | 9.34540400  | 11.08222300 | -2.79242800 | C  | 11.76661100 | 15.41980100 | -3.09487100 |
| H  | 7.58572000  | 14.51424300 | -0.89635000 | C  | 12.56644100 | 17.62594700 | -2.81316600 |
| H  | 6.84159900  | 12.84251300 | -0.93290000 | H  | 14.43727400 | 16.80711200 | -1.93495900 |
| H  | 7.93735500  | 12.22182100 | 1.18091000  | H  | 14.34305900 | 16.73360300 | -3.70915000 |
| H  | 9.49226400  | 14.88407100 | 0.92702100  | C  | 11.57313600 | 16.81860600 | -3.64327900 |
| H  | 9.64860900  | 12.38245400 | 2.70639500  | H  | 11.59281200 | 14.61432000 | -3.81838700 |
| H  | 9.84705900  | 14.05623100 | 3.22163000  | H  | 11.13932400 | 15.21747400 | -2.21601500 |
|    |             |             |             | H  | 12.81276900 | 18.59958300 | -3.24581000 |
|    |             |             |             | H  | 12.17610700 | 17.78493000 | -1.79899800 |
|    |             |             |             | H  | 11.84959400 | 16.86190900 | -4.70539600 |
|    |             |             |             | H  | 10.53760400 | 17.15726500 | -3.54710200 |
|    |             |             |             | O  | 15.04407300 | 14.41921600 | -0.64350200 |
|    |             |             |             | C  | 16.45335500 | 14.52997400 | -0.34344600 |
|    |             |             |             | C  | 14.25845000 | 14.82681300 | 0.49894500  |
|    |             |             |             | C  | 16.51148600 | 14.66074300 | 1.16391800  |
|    |             |             |             | H  | 16.96025400 | 13.64907300 | -0.75338800 |
|    |             |             |             | H  | 16.84953800 | 15.41657900 | -0.85670800 |
|    |             |             |             | C  | 15.24887400 | 15.46452700 | 1.45079100  |
|    |             |             |             | H  | 13.47174000 | 15.50368800 | 0.14418000  |
|    |             |             |             | H  | 13.79112800 | 13.92860500 | 0.92650900  |
|    |             |             |             | H  | 17.43072300 | 15.14563800 | 1.50419900  |



|   |             |             |             |
|---|-------------|-------------|-------------|
| H | 16.44726700 | 13.67294600 | 1.64025700  |
| H | 15.40640600 | 16.52175900 | 1.19834700  |
| H | 14.91332500 | 15.40776800 | 2.49032500  |
| O | 14.91885900 | 11.78540000 | -1.87177100 |
| C | 15.72245800 | 10.97769100 | -2.75039700 |
| C | 15.11640800 | 11.22929900 | -0.56412600 |
| C | 15.53251900 | 9.54947700  | -2.24360800 |
| H | 15.38357700 | 11.16598100 | -3.77384000 |
| H | 16.76727300 | 11.31330500 | -2.66889200 |
| C | 15.01997600 | 9.73044100  | -0.79923100 |
| H | 16.11919900 | 11.52118700 | -0.20770700 |
| H | 14.34672300 | 11.63348000 | 0.10450000  |
| H | 16.47279000 | 8.99176300  | -2.28753400 |
| H | 14.80331800 | 9.00554500  | -2.85352500 |
| H | 15.59710200 | 9.16225900  | -0.06432700 |
| H | 13.97419800 | 9.41283700  | -0.71747200 |
| O | 13.36972800 | 12.75274000 | -4.05783000 |
| C | 12.50562300 | 11.58698600 | -4.00855200 |
| C | 13.57444200 | 13.15664700 | -5.43468200 |
| C | 12.53099300 | 11.04016000 | -5.41811600 |
| H | 12.89783800 | 10.91585300 | -3.23330600 |
| H | 11.49992000 | 11.90764500 | -3.71424500 |
| C | 12.58717500 | 12.32896400 | -6.23127700 |
| H | 13.43176900 | 14.24324000 | -5.49230000 |
| H | 14.61836800 | 12.94217600 | -5.70101900 |
| H | 11.64933500 | 10.43276600 | -5.64158900 |
| H | 13.43333400 | 10.43511100 | -5.59049700 |
| H | 11.59356200 | 12.79756200 | -6.23710600 |
| H | 12.90898300 | 12.18481700 | -7.26637200 |
| F | 9.09143200  | 10.96048500 | -6.40438500 |

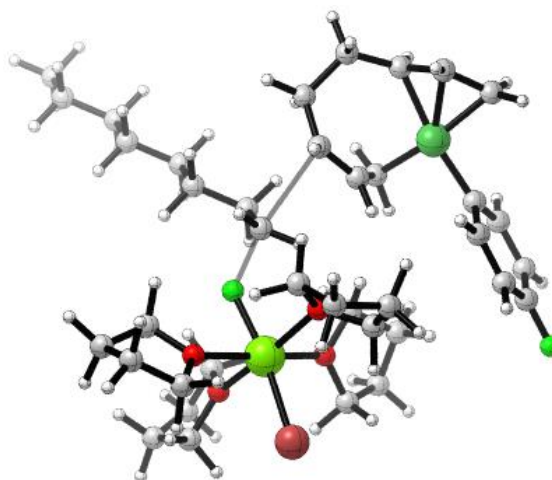

### TS3-4-F-Ph

|    |             |             |             |
|----|-------------|-------------|-------------|
| Ni | 8.46054800  | 10.97048500 | -0.51963300 |
| C  | 7.35895500  | 9.41608800  | -0.09102000 |
| C  | 7.83268800  | 10.02685500 | 1.09134700  |
| C  | 7.67062100  | 11.40659800 | 1.31375300  |
| C  | 8.39951700  | 12.07760500 | 2.44411700  |
| C  | 9.46315200  | 13.14167200 | 2.05268300  |
| C  | 10.50371400 | 12.59841000 | 1.13159800  |
| C  | 10.17497400 | 12.31734900 | -0.19062900 |
| C  | 9.05522900  | 12.80065600 | -0.92338300 |
| C  | 8.97865600  | 10.35312300 | -2.24093900 |
| C  | 8.27903000  | 10.62804500 | -3.42964400 |
| C  | 8.74480700  | 10.26259700 | -4.69209700 |
| C  | 9.96113800  | 9.60648100  | -4.78788500 |
| C  | 10.70191900 | 9.30119600  | -3.65975400 |
| C  | 10.19738300 | 9.67376700  | -2.41115300 |
| H  | 6.38129100  | 9.69371400  | -0.49539300 |
| H  | 7.65461700  | 8.39209500  | -0.30719100 |
| H  | 8.61035100  | 9.51675900  | 1.66977300  |
| H  | 6.73865600  | 11.88252100 | 0.98852000  |
| H  | 8.92274300  | 11.30633500 | 3.03093700  |
| H  | 7.68124100  | 12.54853100 | 3.13186300  |
| H  | 8.94599700  | 14.00325400 | 1.59422900  |
| H  | 9.91466600  | 13.51880000 | 2.98167500  |

|    |             |             |             |   |             |             |             |
|----|-------------|-------------|-------------|---|-------------|-------------|-------------|
| H  | 11.30064000 | 12.00501300 | 1.59124400  | H | 15.17148300 | 15.43665300 | 0.89136100  |
| H  | 10.92847100 | 11.76593600 | -0.76932800 | H | 18.97732500 | 14.71177600 | 0.64074600  |
| H  | 9.16707400  | 12.94189100 | -2.00043900 | H | 17.51167300 | 14.07071900 | 1.41153000  |
| H  | 8.41010500  | 13.54110200 | -0.44428200 | H | 17.77691700 | 16.76732800 | -0.02186900 |
| H  | 7.32493700  | 11.15666300 | -3.37299000 | H | 17.22107500 | 16.51763100 | 1.64503700  |
| H  | 8.18479700  | 10.48065400 | -5.59941400 | O | 13.81033700 | 12.32807400 | -1.51580100 |
| H  | 11.64858000 | 8.77252800  | -3.76599900 | C | 13.59455500 | 11.18602900 | -2.39385000 |
| H  | 10.78747100 | 9.40181200  | -1.52950600 | C | 14.37366600 | 11.88081000 | -0.27132200 |
| C  | 12.05861500 | 14.36727800 | -0.04048300 | C | 13.97497700 | 9.97047200  | -1.56901600 |
| H  | 12.61864000 | 14.16934800 | 0.87013600  | H | 12.54218400 | 11.17809700 | -2.70671600 |
| H  | 11.98591700 | 13.54347800 | -0.72686300 | H | 14.24886400 | 11.32184500 | -3.26363000 |
| F  | 13.35991400 | 15.11199800 | -0.94183200 | C | 14.99983400 | 10.54244300 | -0.59523100 |
| Mg | 14.47536600 | 14.21117000 | -2.28983100 | H | 15.07789700 | 12.65023100 | 0.07574800  |
| Br | 16.21390400 | 13.17748100 | -3.75392700 | H | 13.56472400 | 11.78039400 | 0.47075900  |
| O  | 14.69498600 | 16.16657400 | -3.07598100 | H | 14.36868300 | 9.16144400  | -2.19069800 |
| C  | 15.91000400 | 16.74502700 | -3.58085000 | H | 13.10101800 | 9.58670100  | -1.02378700 |
| C  | 13.61350100 | 17.10937400 | -3.14516100 | H | 15.96253400 | 10.69239600 | -1.10218500 |
| C  | 15.62416900 | 18.23241800 | -3.64009800 | H | 15.15891500 | 9.92221200  | 0.29146700  |
| H  | 16.72364000 | 16.45261900 | -2.90683200 | O | 12.86279300 | 14.01477800 | -3.67023900 |
| H  | 16.11940800 | 16.32273300 | -4.57396300 | C | 11.47261500 | 13.76683000 | -3.37429700 |
| C  | 14.14340800 | 18.23956500 | -4.00520200 | C | 13.07271600 | 14.00726800 | -5.09953900 |
| H  | 12.73868600 | 16.59046000 | -3.55789600 | C | 10.85739400 | 13.33045100 | -4.68654400 |
| H  | 13.36711700 | 17.43943900 | -2.12500000 | H | 11.39912300 | 13.00222800 | -2.59341300 |
| H  | 16.25866300 | 18.75606900 | -4.36043200 | H | 11.02777800 | 14.69949100 | -2.98971100 |
| H  | 15.77334600 | 18.69304300 | -2.65346300 | C | 11.68363400 | 14.12380000 | -5.69204400 |
| H  | 14.01681200 | 18.00015100 | -5.06963600 | H | 13.75589300 | 14.83227300 | -5.33579800 |
| H  | 13.64274300 | 19.19166800 | -3.80824300 | H | 13.56388900 | 13.06612700 | -5.38091200 |
| O  | 16.04003700 | 14.72448700 | -0.84879400 | H | 9.78198400  | 13.52640900 | -4.72766300 |
| C  | 17.37176600 | 14.18163600 | -0.74007600 | H | 10.99894300 | 12.24909200 | -4.82757100 |
| C  | 15.85668200 | 15.78626700 | 0.10484300  | H | 11.35869900 | 15.17386200 | -5.71186000 |
| C  | 17.88524200 | 14.69590700 | 0.58865700  | H | 11.63131400 | 13.73076300 | -6.71106300 |
| H  | 17.30586500 | 13.09192600 | -0.81873000 | C | 11.06124000 | 15.46564500 | -0.04475100 |
| H  | 17.97164900 | 14.54018100 | -1.58733600 | H | 11.10979700 | 15.96417100 | -1.02548500 |
| C  | 17.24286800 | 16.07603300 | 0.64466200  | H | 10.05196000 | 15.02916700 | 0.01033500  |
| H  | 15.38029900 | 16.62915000 | -0.40868000 | C | 11.28926100 | 16.47385700 | 1.06817100  |

|   |             |             |             |   |             |             |             |
|---|-------------|-------------|-------------|---|-------------|-------------|-------------|
| H | 11.30034400 | 15.94202900 | 2.03370200  | C | 6.68587800  | 11.55615000 | -0.92276000 |
| H | 12.29153100 | 16.92007300 | 0.95067400  | C | 6.41219200  | 11.56193000 | 0.45861200  |
| C | 10.23692600 | 17.56800300 | 1.10938500  | C | 6.88040200  | 12.61603100 | 1.25489600  |
| H | 10.20512300 | 18.08851600 | 0.13769100  | C | 6.69914100  | 12.67251000 | 2.73727100  |
| H | 9.24299300  | 17.10782100 | 1.23438500  | C | 7.83815500  | 13.39653200 | 3.47831800  |
| C | 10.47108800 | 18.57909700 | 2.21920200  | C | 9.08086100  | 12.57546100 | 3.61729500  |
| H | 11.46328300 | 19.04257300 | 2.08915000  | C | 9.90661100  | 12.27294400 | 2.60062200  |
| H | 10.51361400 | 18.05310500 | 3.18698300  | C | 9.78501800  | 12.65236700 | 1.18642900  |
| C | 9.41004100  | 19.66531400 | 2.28286400  | C | 9.41101400  | 11.57339900 | -1.49192900 |
| H | 8.41899000  | 19.20156800 | 2.41612700  | C | 10.27051900 | 12.58847900 | -1.95317000 |
| H | 9.36315200  | 20.19169500 | 1.31505700  | C | 11.05949300 | 12.46736400 | -3.09890000 |
| C | 9.64780900  | 20.67467700 | 3.39504800  | C | 11.00245600 | 11.29007100 | -3.82305500 |
| H | 10.63713500 | 21.13764600 | 3.25789900  | C | 10.14456300 | 10.26803800 | -3.45753700 |
| H | 9.69760000  | 20.14451100 | 4.35828200  | C | 9.36062600  | 10.43440400 | -2.31692800 |
| C | 8.57581500  | 21.74922700 | 3.45090000  | H | 6.60746800  | 12.48370200 | -1.49486500 |
| H | 7.58484100  | 21.30736600 | 3.61374000  | H | 6.46268400  | 10.66176000 | -1.50172600 |
| H | 8.75505200  | 22.46873700 | 4.25671000  | H | 6.11982000  | 10.63024300 | 0.95377100  |
| H | 8.53064500  | 22.30996300 | 2.50873900  | H | 6.92896900  | 13.60864300 | 0.78288000  |
| F | 10.43279700 | 9.26100400  | -6.00294700 | H | 6.57947600  | 11.65639100 | 3.14910300  |

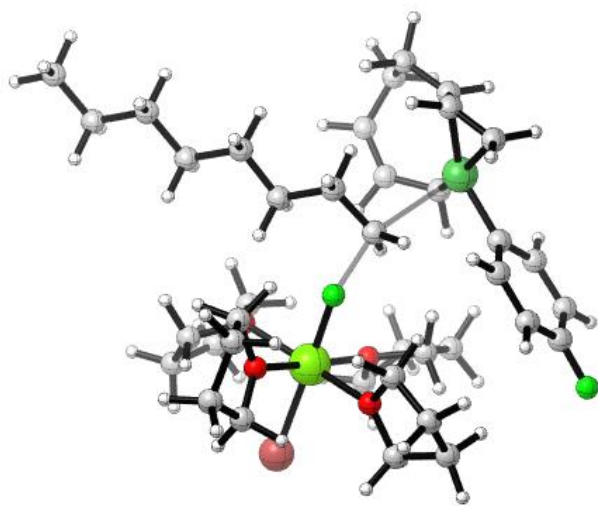

### TS10-4-F-Ph

|    |            |             |            |   |             |             |            |
|----|------------|-------------|------------|---|-------------|-------------|------------|
| Ni | 8.36539400 | 11.84675000 | 0.09148800 | C | 14.28401500 | 10.04376700 | 0.94562800 |
|----|------------|-------------|------------|---|-------------|-------------|------------|

|   |             |             |             |   |             |             |             |
|---|-------------|-------------|-------------|---|-------------|-------------|-------------|
| C | 12.62631500 | 10.27576600 | -0.62541200 | H | 11.01113500 | 2.48405400  | -0.26184000 |
| C | 14.05460700 | 11.53419500 | 0.85199100  | H | 11.15809100 | 2.66573700  | 1.49323400  |
| H | 14.51714700 | 9.65599700  | 1.94063100  | O | 12.19120900 | 7.19101000  | -1.26336500 |
| H | 15.06892200 | 9.70133100  | 0.25258400  | C | 10.92588200 | 7.04724800  | -1.93343500 |
| C | 13.30296900 | 11.64359900 | -0.47551700 | C | 13.27097400 | 7.16429900  | -2.21541200 |
| H | 12.96669100 | 9.74990900  | -1.52877500 | C | 11.27634300 | 6.69257300  | -3.36660900 |
| H | 11.53344400 | 10.32751200 | -0.65211500 | H | 10.34877900 | 6.27775200  | -1.40596300 |
| H | 14.98013300 | 12.11650200 | 0.87823100  | H | 10.38530600 | 8.00073300  | -1.86290400 |
| H | 13.41641900 | 11.86100300 | 1.68539800  | C | 12.60647900 | 7.41382900  | -3.55376800 |
| H | 13.99750500 | 11.81781700 | -1.30535000 | H | 14.00744900 | 7.91792100  | -1.91438800 |
| H | 12.57204200 | 12.45784300 | -0.48449800 | H | 13.75914700 | 6.18003000  | -2.16909800 |
| O | 12.26069000 | 7.51954500  | 3.01325200  | H | 10.50238500 | 7.00623900  | -4.07473900 |
| C | 12.56678000 | 6.37707100  | 3.82070300  | H | 11.41503200 | 5.60785400  | -3.47471400 |
| C | 12.68981700 | 8.64374000  | 3.78266600  | H | 12.43675600 | 8.48829100  | -3.71546000 |
| C | 13.90469000 | 6.68922900  | 4.48754000  | H | 13.19735100 | 7.03238700  | -4.39136600 |
| H | 11.75802000 | 6.26290700  | 4.56284500  | H | 10.35376700 | 13.51825200 | -1.38665500 |
| H | 12.58103800 | 5.50104200  | 3.16633300  | H | 9.14728300  | 9.47782100  | -0.10968300 |
| C | 14.02816700 | 8.22131800  | 4.37480300  | C | 8.56937600  | 9.30157000  | 2.04160500  |
| H | 12.71748700 | 9.51459800  | 3.11591100  | H | 7.81848900  | 8.56976200  | 1.70781400  |
| H | 11.94270200 | 8.83603100  | 4.57070700  | H | 8.01979400  | 10.22073300 | 2.30410600  |
| H | 14.71843700 | 6.20429300  | 3.93986500  | C | 9.26632400  | 8.82687700  | 3.30777700  |
| H | 13.92219500 | 6.34104800  | 5.52498500  | H | 10.00113800 | 9.59158800  | 3.60540700  |
| H | 14.84983100 | 8.47320500  | 3.69490800  | H | 9.83559000  | 7.90997100  | 3.10714300  |
| H | 14.21779300 | 8.71132200  | 5.33461200  | C | 8.28496900  | 8.60136800  | 4.44394100  |
| O | 11.45683100 | 5.47482400  | 1.01008800  | H | 7.75826800  | 9.54319500  | 4.66968300  |
| C | 10.11836400 | 5.20254000  | 1.45162700  | H | 7.50670400  | 7.88890700  | 4.12245800  |
| C | 12.02725400 | 4.30671500  | 0.38702300  | C | 8.95277700  | 8.07734900  | 5.70374000  |
| C | 9.68500000  | 3.99805900  | 0.64207500  | H | 9.52256500  | 7.16338600  | 5.45829200  |
| H | 10.13373500 | 4.97250300  | 2.53064600  | H | 9.69820300  | 8.81090700  | 6.05568700  |
| H | 9.53496600  | 6.11272800  | 1.28944600  | C | 7.97427300  | 7.77254700  | 6.82599500  |
| C | 10.98769100 | 3.21035200  | 0.55549000  | H | 7.40105100  | 8.68189600  | 7.06967200  |
| H | 12.22056400 | 4.55447400  | -0.66753400 | H | 7.23076900  | 7.03998700  | 6.47058700  |
| H | 12.99111700 | 4.08837500  | 0.85980800  | C | 8.64078000  | 7.24219700  | 8.08543600  |
| H | 9.35357700  | 4.30897800  | -0.35829100 | H | 9.22375500  | 6.34273400  | 7.83391000  |
| H | 8.86715100  | 3.44395500  | 1.11189100  | H | 9.37222100  | 7.98099500  | 8.44675500  |

|   |             |             |             |
|---|-------------|-------------|-------------|
| C | 7.64285100  | 6.92060700  | 9.18449900  |
| H | 8.13228900  | 6.54142300  | 10.08769200 |
| H | 7.06767900  | 7.81128200  | 9.46682700  |
| H | 6.92374100  | 6.16143800  | 8.85200600  |
| H | 8.67193700  | 9.61894400  | -2.07478400 |
| F | 11.79260100 | 11.12721900 | -4.90179600 |

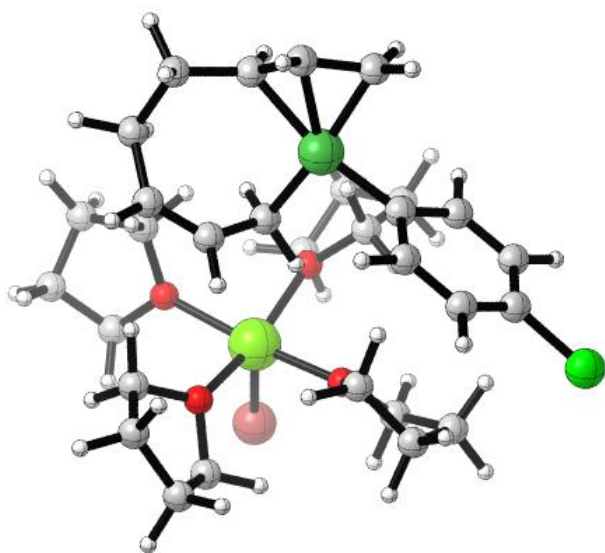

**INT1-4-Cl-Ph**

|    |             |             |             |
|----|-------------|-------------|-------------|
| Ni | 9.54042600  | 13.04214100 | -0.73973900 |
| C  | 7.63697700  | 13.46273300 | -0.55768900 |
| C  | 8.20418500  | 13.14433200 | 0.69189800  |
| C  | 9.37427700  | 13.78668200 | 1.14165900  |
| C  | 10.05995500 | 13.32087200 | 2.39011700  |
| C  | 11.59258500 | 13.18880500 | 2.27405200  |
| C  | 12.00024800 | 12.03101400 | 1.41857300  |
| C  | 11.89519200 | 12.02135100 | 0.06887200  |
| C  | 11.50614200 | 13.11968600 | -0.80609600 |
| C  | 9.30765900  | 12.47974900 | -2.52468900 |
| C  | 9.11790700  | 13.32642000 | -3.63307200 |
| C  | 9.00324300  | 12.86379900 | -4.94394300 |
| C  | 9.04926900  | 11.49553800 | -5.17589800 |

|    |             |             |             |
|----|-------------|-------------|-------------|
| C  | 9.18550600  | 10.60118000 | -4.12232800 |
| C  | 9.31592200  | 11.10295300 | -2.82840300 |
| H  | 7.58231600  | 14.50370200 | -0.89191700 |
| H  | 6.84021700  | 12.83146400 | -0.94441800 |
| H  | 7.93914200  | 12.19171200 | 1.16245300  |
| H  | 9.48894000  | 14.85896700 | 0.93044200  |
| H  | 9.65324100  | 12.34201600 | 2.68789900  |
| H  | 9.84027200  | 14.01192600 | 3.21942900  |
| H  | 11.97185100 | 14.14784300 | 1.88238400  |
| H  | 12.01858700 | 13.08274100 | 3.28164300  |
| H  | 12.21658000 | 11.09249100 | 1.93156200  |
| H  | 12.07448600 | 11.06230500 | -0.43552900 |
| H  | 11.88025600 | 12.98581600 | -1.83297800 |
| H  | 11.78674200 | 14.10849900 | -0.41755100 |
| H  | 9.04539400  | 14.40641100 | -3.47424300 |
| H  | 8.86633400  | 13.55066400 | -5.77805700 |
| H  | 9.19922300  | 9.53039400  | -4.31963600 |
| H  | 9.44348100  | 10.37729200 | -2.02118800 |
| Mg | 14.36087900 | 13.69769200 | -2.48503800 |
| Br | 16.34363400 | 14.39200600 | -3.76868800 |
| O  | 13.16779700 | 15.37462600 | -2.67566700 |
| C  | 13.76518900 | 16.68556100 | -2.78575700 |
| C  | 11.77746400 | 15.42132800 | -3.09137300 |
| C  | 12.58192900 | 17.62693800 | -2.82543200 |
| H  | 14.44737200 | 16.80962500 | -1.93538700 |
| H  | 14.36047700 | 16.72524400 | -3.70932800 |
| C  | 11.58859400 | 16.81585500 | -3.65175800 |
| H  | 11.60031500 | 14.61002700 | -3.80744000 |
| H  | 11.14989900 | 15.22976500 | -2.21021300 |
| H  | 12.83164200 | 18.59675200 | -3.26460700 |
| H  | 12.18950200 | 17.79449500 | -1.81342500 |
| H  | 11.86789900 | 16.84960800 | -4.71345900 |
| H  | 10.55369600 | 17.15803300 | -3.56103700 |
| O  | 15.04812000 | 14.42310400 | -0.64437700 |
| C  | 16.45658100 | 14.54490300 | -0.34476000 |

|   |             |             |             |
|---|-------------|-------------|-------------|
| C | 14.25914700 | 14.83398200 | 0.49435400  |
| C | 16.51318600 | 14.68549200 | 1.16174300  |
| H | 16.96906500 | 13.66478200 | -0.74942700 |
| H | 16.84711900 | 15.43082200 | -0.86356100 |
| C | 15.24540600 | 15.48323400 | 1.44293500  |
| H | 13.46911400 | 15.50417300 | 0.13420400  |
| H | 13.79561500 | 13.93620700 | 0.92712200  |
| H | 17.42906200 | 15.17841700 | 1.49947000  |
| H | 16.45504700 | 13.70032300 | 1.64423700  |
| H | 15.39661900 | 16.53978300 | 1.18384900  |
| H | 14.91005600 | 15.43123900 | 2.48273900  |
| O | 14.93650000 | 11.78769600 | -1.86128300 |
| C | 15.74031500 | 10.97842100 | -2.73860900 |
| C | 15.13731400 | 11.23834900 | -0.55140100 |
| C | 15.56081400 | 9.55213700  | -2.22247600 |
| H | 15.39471100 | 11.15764000 | -3.76148000 |
| H | 16.78355400 | 11.32063300 | -2.66507600 |
| C | 15.04757500 | 9.73807400  | -0.77911500 |
| H | 16.13855000 | 11.53678300 | -0.19599900 |
| H | 14.36515100 | 11.64168500 | 0.11479100  |
| H | 16.50520000 | 9.00119900  | -2.26320000 |
| H | 14.83571500 | 8.99879100  | -2.82879100 |
| H | 15.62718400 | 9.17606400  | -0.04143700 |
| H | 14.00318500 | 9.41621900  | -0.69547200 |
| O | 13.36603900 | 12.74063000 | -4.03975600 |
| C | 12.51310200 | 11.56699300 | -3.97821900 |
| C | 13.55945100 | 13.13556300 | -5.42185800 |
| C | 12.52864400 | 11.01479700 | -5.38508100 |
| H | 12.91921800 | 10.90209500 | -3.20534100 |
| H | 11.50629000 | 11.87921000 | -3.67707900 |
| C | 12.56670400 | 12.30076400 | -6.20358200 |
| H | 13.41494100 | 14.22164600 | -5.48473900 |
| H | 14.60137800 | 12.92019600 | -5.69526300 |
| H | 11.64875500 | 10.39892300 | -5.59478500 |
| H | 13.43367400 | 10.41570700 | -5.56416000 |

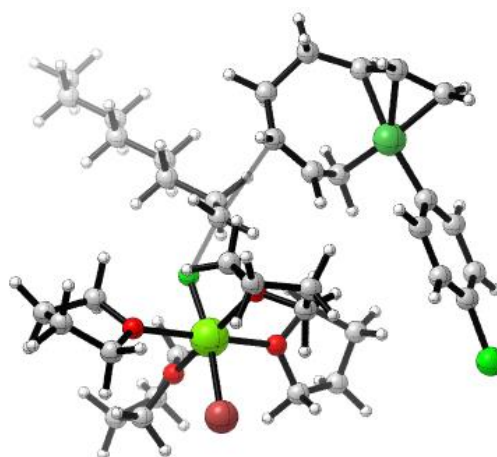

**TS3-4-Cl-Ph**

|    |             |             |             |
|----|-------------|-------------|-------------|
| Ni | 8.41651900  | 10.97226000 | -0.49156200 |
| C  | 7.28484100  | 9.44447300  | -0.04561400 |
| C  | 7.78185700  | 10.05147500 | 1.12925600  |
| C  | 7.65242600  | 11.43590200 | 1.34423300  |
| C  | 8.40142900  | 12.09757000 | 2.46683200  |
| C  | 9.46992900  | 13.15156800 | 2.06384300  |
| C  | 10.50323300 | 12.59166400 | 1.14464100  |
| C  | 10.17068600 | 12.30086500 | -0.17310300 |
| C  | 9.05252000  | 12.78560200 | -0.90827600 |
| C  | 8.91765700  | 10.34975900 | -2.21095700 |
| C  | 8.24334600  | 10.66324100 | -3.40494400 |
| C  | 8.73688800  | 10.34266400 | -4.66753500 |
| C  | 9.95832200  | 9.68874700  | -4.76413500 |
| C  | 10.66308000 | 9.32989300  | -3.62469600 |
| C  | 10.13038000 | 9.65788800  | -2.37709900 |
| H  | 6.30948800  | 9.74003600  | -0.44254700 |
| H  | 7.55592800  | 8.41269300  | -0.25696000 |
| H  | 8.55262700  | 9.52756300  | 1.70449800  |

|    |             |             |             |   |             |             |             |
|----|-------------|-------------|-------------|---|-------------|-------------|-------------|
| H  | 6.72890500  | 11.93055700 | 1.02268800  | C | 17.87758800 | 14.72395400 | 0.60501500  |
| H  | 8.92315800  | 11.32063700 | 3.04736400  | H | 17.31579500 | 13.11154100 | -0.80035300 |
| H  | 7.69537200  | 12.57537000 | 3.16236300  | H | 17.97646900 | 14.56132500 | -1.56958900 |
| H  | 8.95614600  | 14.01190200 | 1.59952200  | C | 17.22577800 | 16.10000200 | 0.65281900  |
| H  | 9.92740600  | 13.53402300 | 2.98757000  | H | 15.36423400 | 16.63650500 | -0.41146200 |
| H  | 11.30167900 | 12.00289100 | 1.60696700  | H | 15.15820800 | 15.44660500 | 0.89164600  |
| H  | 10.91706700 | 11.73406500 | -0.74591000 | H | 18.96926400 | 14.74723100 | 0.66259100  |
| H  | 9.17093500  | 12.92112300 | -1.98567300 | H | 17.50391900 | 14.09923700 | 1.42817500  |
| H  | 8.41948100  | 13.54089500 | -0.43604100 | H | 17.75845900 | 16.79249200 | -0.01359000 |
| H  | 7.29267200  | 11.19825700 | -3.35328600 | H | 17.19595500 | 16.54509600 | 1.65144300  |
| H  | 8.19166900  | 10.60824700 | -5.57145000 | O | 13.79898900 | 12.32540700 | -1.52301400 |
| H  | 11.61239900 | 8.80246200  | -3.71432800 | C | 13.57699500 | 11.18417500 | -2.39969700 |
| H  | 10.69689500 | 9.34973500  | -1.49278800 | C | 14.39433000 | 11.87856200 | -0.29383600 |
| C  | 12.04888400 | 14.34560200 | -0.04714000 | C | 14.03857400 | 9.97261400  | -1.60828500 |
| H  | 12.61670400 | 14.14594100 | 0.85814700  | H | 12.51134600 | 11.14623200 | -2.66234400 |
| H  | 11.97942500 | 13.52745700 | -0.74106400 | H | 14.18059700 | 11.34666800 | -3.30044400 |
| F  | 13.35565300 | 15.10137600 | -0.95311300 | C | 15.06679100 | 10.57293600 | -0.65504300 |
| Mg | 14.48118800 | 14.20740000 | -2.29099100 | H | 15.07387900 | 12.66805100 | 0.05740400  |
| Br | 16.23535200 | 13.15345700 | -3.72049600 | H | 13.59851900 | 11.73788900 | 0.45657000  |
| O  | 14.70458800 | 16.15703700 | -3.08520700 | H | 14.44951700 | 9.19413200  | -2.25715200 |
| C  | 15.92159000 | 16.73585200 | -3.58436400 | H | 13.20351400 | 9.53858300  | -1.04128400 |
| C  | 13.62131900 | 17.09723200 | -3.16501700 | H | 16.00481700 | 10.77536800 | -1.18988000 |
| C  | 15.63501400 | 18.22296900 | -3.64588300 | H | 15.27922500 | 9.94603500  | 0.21569200  |
| H  | 16.73211500 | 16.44485100 | -2.90611800 | O | 12.88210500 | 14.00494900 | -3.68823100 |
| H  | 16.13642000 | 16.31290000 | -4.57607700 | C | 11.48828000 | 13.75765400 | -3.41088200 |
| C  | 14.15639500 | 18.22930200 | -4.01967100 | C | 13.11540900 | 13.97316700 | -5.11426700 |
| H  | 12.75219100 | 16.57621300 | -3.58681200 | C | 10.89256700 | 13.30760900 | -4.72811800 |
| H  | 13.36375600 | 17.42524000 | -2.14697200 | H | 11.40488800 | 12.99972300 | -2.62430300 |
| H  | 16.27324200 | 18.74687900 | -4.36272400 | H | 11.03646700 | 14.69278200 | -3.04016900 |
| H  | 15.77849900 | 18.68391800 | -2.65855700 | C | 11.73708900 | 14.08407500 | -5.73121700 |
| H  | 14.03631100 | 17.99206300 | -5.08529300 | H | 13.80435200 | 14.79279600 | -5.35229100 |
| H  | 13.65395200 | 19.18074100 | -3.82403400 | H | 13.60871100 | 13.02593800 | -5.37091700 |
| O  | 16.03969700 | 14.73544300 | -0.84218900 | H | 9.81915000  | 13.50897900 | -4.79020400 |
| C  | 17.37424400 | 14.20174700 | -0.72442500 | H | 11.03236600 | 12.22427800 | -4.85546000 |
| C  | 15.84428400 | 15.79878600 | 0.10706500  | H | 11.41578400 | 15.13463500 | -5.77284300 |

|    |             |             |             |
|----|-------------|-------------|-------------|
| H  | 11.69973500 | 13.67340200 | -6.74390100 |
| C  | 11.05616900 | 15.44735800 | -0.05107900 |
| H  | 11.10447300 | 15.94141800 | -1.03417500 |
| H  | 10.04549700 | 15.01475600 | 0.00731800  |
| C  | 11.28758200 | 16.45829700 | 1.05861200  |
| H  | 11.30984900 | 15.92837000 | 2.02508900  |
| H  | 12.28576200 | 16.91074200 | 0.93277800  |
| C  | 10.22857800 | 17.54575100 | 1.10714200  |
| H  | 10.18704300 | 18.06650500 | 0.13598000  |
| H  | 9.23837200  | 17.07924400 | 1.23841700  |
| C  | 10.46359400 | 18.55744100 | 2.21622800  |
| H  | 11.45240700 | 19.02653800 | 2.08078000  |
| H  | 10.51476100 | 18.03096000 | 3.18334900  |
| C  | 9.39687100  | 19.63759700 | 2.28709100  |
| H  | 8.40900900  | 19.16819300 | 2.42422100  |
| H  | 9.34243200  | 20.16552600 | 1.32054000  |
| C  | 9.63445900  | 20.64603100 | 3.40017200  |
| H  | 10.62093200 | 21.11406000 | 3.25970700  |
| H  | 9.69096400  | 20.11428800 | 4.36217200  |
| C  | 8.55751000  | 21.71522100 | 3.46266200  |
| H  | 7.56936000  | 21.26832000 | 3.62889000  |
| H  | 8.73674200  | 22.43405300 | 4.26906500  |
| H  | 8.50564100  | 22.27747700 | 2.52176600  |
| Cl | 10.63814400 | 9.34030200  | -6.35593700 |

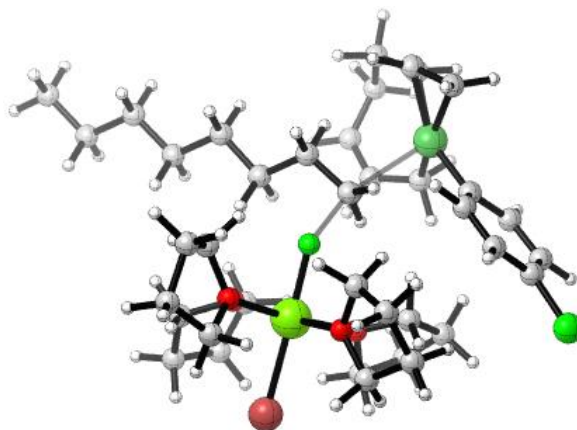

**TS10-4-Cl-Ph**

|    |             |             |             |
|----|-------------|-------------|-------------|
| Ni | 8.36320000  | 11.88123300 | 0.10014200  |
| C  | 6.71306000  | 11.58131200 | -0.95851600 |
| C  | 6.40761100  | 11.55262600 | 0.41628000  |
| C  | 6.83560200  | 12.59921700 | 1.24369600  |
| C  | 6.62147400  | 12.62581000 | 2.72248500  |
| C  | 7.72899400  | 13.36130800 | 3.49953800  |
| C  | 8.98581000  | 12.56491600 | 3.65575300  |
| C  | 9.84131200  | 12.29663100 | 2.65419400  |
| C  | 9.74049300  | 12.69600300 | 1.24409900  |
| C  | 9.44719800  | 11.66969400 | -1.46254400 |
| C  | 10.27902400 | 12.72612100 | -1.87844000 |
| C  | 11.10896300 | 12.65637700 | -2.99693600 |
| C  | 11.13132100 | 11.48811400 | -3.74451300 |
| C  | 10.29182400 | 10.43048900 | -3.42501500 |
| C  | 9.46111900  | 10.54842700 | -2.31252500 |
| H  | 6.62599800  | 12.51869000 | -1.51309600 |
| H  | 6.52083000  | 10.69471800 | -1.56013700 |
| H  | 6.12232600  | 10.60553200 | 0.88536800  |
| H  | 6.87757900  | 13.60106000 | 0.79099800  |
| H  | 6.51321700  | 11.60109200 | 3.11534400  |
| H  | 5.66405800  | 13.12862800 | 2.93225900  |
| H  | 7.93381000  | 14.30810600 | 2.97252100  |
| H  | 7.34230000  | 13.64264600 | 4.48705500  |
| H  | 9.20046600  | 12.16190900 | 4.64762600  |
| H  | 10.70469300 | 11.66999900 | 2.91538400  |



|    |             |             |             |   |             |             |             |
|----|-------------|-------------|-------------|---|-------------|-------------|-------------|
| H  | 10.72683600 | 12.61166200 | 0.76512400  | O | 11.42598100 | 5.51243800  | 1.04114400  |
| H  | 9.42198000  | 13.75166000 | 1.16499400  | C | 10.09524900 | 5.25984200  | 1.52002900  |
| H  | 11.75494600 | 13.48848400 | -3.27053300 | C | 11.98808800 | 4.32149400  | 0.45569900  |
| H  | 10.28255200 | 9.53490000  | -4.04614700 | C | 9.68302900  | 3.96212500  | 0.85383800  |
| C  | 9.46809100  | 9.69247200  | 0.89906900  | H | 10.12540500 | 5.15860100  | 2.61824200  |
| H  | 10.36671100 | 10.27268800 | 1.06883200  | H | 9.48658600  | 6.13250700  | 1.26742000  |
| F  | 10.48913400 | 8.09738500  | 0.76619500  | C | 11.00981600 | 3.21403400  | 0.79885900  |
| Mg | 12.31275600 | 7.47739700  | 0.82562600  | H | 12.07754700 | 4.49187200  | -0.62880700 |
| Br | 14.65411100 | 6.57644900  | 0.88343700  | H | 12.99810300 | 4.18113800  | 0.85612300  |
| O  | 13.02211600 | 9.51499400  | 0.53030700  | H | 9.31116600  | 4.15582000  | -0.16157200 |
| C  | 14.33651700 | 9.99214900  | 0.85878400  | H | 8.90020400  | 3.43330700  | 1.40524100  |
| C  | 12.64513700 | 10.23938300 | -0.66079200 | H | 11.02824300 | 2.39754600  | 0.07147800  |
| C  | 14.19676700 | 11.48931500 | 0.70112900  | H | 11.24579200 | 2.79329400  | 1.78542300  |
| H  | 14.59025500 | 9.64243400  | 1.86291600  | O | 12.14858600 | 7.15103300  | -1.27825000 |
| H  | 15.06305600 | 9.55971900  | 0.15300200  | C | 10.87037600 | 7.02736000  | -1.92760400 |
| C  | 13.34380100 | 11.60046200 | -0.56679000 | C | 13.21381600 | 7.04208600  | -2.24163500 |
| H  | 12.98555000 | 9.67145300  | -1.53992100 | C | 11.18713800 | 6.61405300  | -3.35287000 |
| H  | 11.55317400 | 10.30130400 | -0.69271400 | H | 10.27406600 | 6.29268000  | -1.37307300 |
| H  | 15.15988500 | 12.00221500 | 0.62524300  | H | 10.36127600 | 8.00005500  | -1.87793800 |
| H  | 13.65714500 | 11.89983400 | 1.56566300  | C | 12.54186000 | 7.27481500  | -3.57837800 |
| H  | 13.96056600 | 11.77125400 | -1.45659900 | H | 13.98706500 | 7.77438400  | -1.98319300 |
| H  | 12.61942000 | 12.41908000 | -0.51453300 | H | 13.65969400 | 6.03974000  | -2.16429500 |
| O  | 12.26760500 | 7.54775800  | 2.99808900  | H | 10.41671700 | 6.93466600  | -4.06123800 |
| C  | 12.59495000 | 6.42250600  | 3.82085500  | H | 11.28196200 | 5.52184200  | -3.42660300 |
| C  | 12.69754800 | 8.68869300  | 3.74345500  | H | 12.41364500 | 8.35129000  | -3.76261800 |
| C  | 13.94603600 | 6.75242600  | 4.44947300  | H | 13.10582400 | 6.84956700  | -4.41314000 |
| H  | 11.80392800 | 6.32129300  | 4.58381200  | H | 10.31115700 | 13.64636900 | -1.29167000 |
| H  | 12.59603400 | 5.53285100  | 3.18469800  | H | 9.16214500  | 9.53728800  | -0.12399700 |
| C  | 14.04647500 | 8.28569300  | 4.32728900  | C | 8.57447300  | 9.33127900  | 2.02131200  |
| H  | 12.71024300 | 9.54932400  | 3.06231600  | H | 7.83189900  | 8.59780000  | 1.67279300  |
| H  | 11.95762100 | 8.88705700  | 4.53693800  | H | 8.01598100  | 10.24267200 | 2.29096200  |
| H  | 14.74901200 | 6.27651800  | 3.87775600  | C | 9.26467000  | 8.84529100  | 3.28642400  |
| H  | 13.99802300 | 6.40714000  | 5.48667200  | H | 9.98344300  | 9.61559100  | 3.60783700  |
| H  | 14.85962300 | 8.54349300  | 3.63984800  | H | 9.85046900  | 7.94188600  | 3.07569000  |
| H  | 14.23779200 | 8.78411200  | 5.28240000  | C | 8.27678200  | 8.57873200  | 4.40760300  |

|    |             |             |             |   |             |             |             |
|----|-------------|-------------|-------------|---|-------------|-------------|-------------|
| H  | 7.73080600  | 9.50526700  | 4.65057800  | C | 9.42982900  | 13.82415000 | 1.07329900  |
| H  | 7.51439100  | 7.85954900  | 4.06353300  | C | 10.06789600 | 13.29529000 | 2.32138300  |
| C  | 8.94656500  | 8.03725400  | 5.65889800  | C | 11.59963000 | 13.14220200 | 2.23386200  |
| H  | 9.52608100  | 7.13428100  | 5.39541000  | C | 12.01098600 | 11.98967500 | 1.37261400  |
| H  | 9.68507700  | 8.77079900  | 6.02534100  | C | 11.93337200 | 11.99261100 | 0.02138700  |
| C  | 7.97050300  | 7.70103700  | 6.77407900  | C | 11.57209100 | 13.10074500 | -0.85434000 |
| H  | 7.38937200  | 8.60025500  | 7.03586900  | C | 9.33177200  | 12.53060300 | -2.59977100 |
| H  | 7.23331600  | 6.96932300  | 6.40404400  | C | 9.12669100  | 13.35026600 | -3.72542600 |
| C  | 8.64191800  | 7.15164100  | 8.02275200  | C | 8.94683100  | 12.84744500 | -5.01209700 |
| H  | 9.23049500  | 6.26087800  | 7.75392300  | C | 8.93183600  | 11.47092900 | -5.25339700 |
| H  | 9.36906600  | 7.88845400  | 8.39662000  | C | 9.09711700  | 10.63083000 | -4.15178800 |
| C  | 7.64757100  | 6.80360200  | 9.11698800  | C | 9.29231900  | 11.14910200 | -2.87158600 |
| H  | 8.14060900  | 6.41127900  | 10.01255700 | H | 7.73282400  | 14.67883900 | -0.97996100 |
| H  | 7.06725500  | 7.68544500  | 9.41600000  | H | 6.89727200  | 13.05337700 | -1.08854700 |
| H  | 6.93268500  | 6.04611000  | 8.77177700  | H | 7.90998800  | 12.30742400 | 1.02989200  |
| H  | 8.79386400  | 9.70456300  | -2.11059400 | H | 9.60100600  | 14.89499800 | 0.89310600  |
| Cl | 12.25256700 | 11.33276100 | -5.09362300 | H | 9.63448300  | 12.31344500 | 2.56697000  |

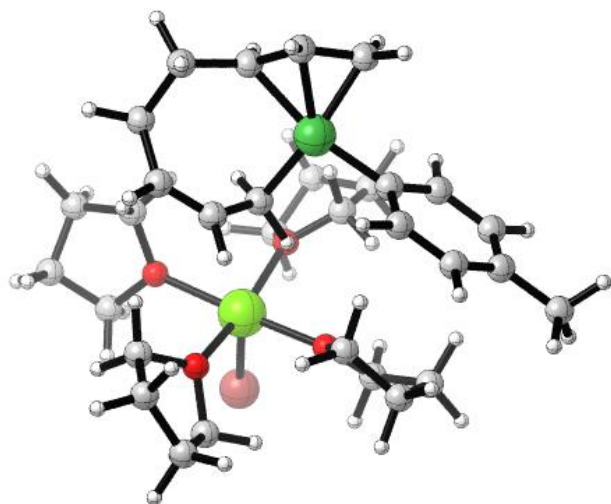

#### INT1-4-Me-Ph

|    |            |             |             |   |             |             |             |
|----|------------|-------------|-------------|---|-------------|-------------|-------------|
| Ni | 9.59682600 | 13.10349100 | -0.81754100 | C | 11.72905600 | 15.39945700 | -3.08876600 |
| C  | 7.71753900 | 13.62975600 | -0.66709500 | C | 12.50812300 | 17.60806600 | -2.76485600 |
| C  | 8.23704600 | 13.25379700 | 0.58655500  | H | 14.32977300 | 16.79237000 | -1.78825900 |

|   |             |             |             |
|---|-------------|-------------|-------------|
| H | 14.33403100 | 16.71544900 | -3.56388800 |
| C | 11.56039500 | 16.79846400 | -3.64447500 |
| H | 11.59709500 | 14.59572000 | -3.82325300 |
| H | 11.05794700 | 15.18688600 | -2.24461100 |
| H | 12.77574700 | 18.58125900 | -3.18586800 |
| H | 12.06568500 | 17.76818600 | -1.77258000 |
| H | 11.89212600 | 16.84256100 | -4.69075900 |
| H | 10.52042700 | 17.13466900 | -3.60235200 |
| O | 15.02390300 | 14.40804800 | -0.57530500 |
| C | 16.44432400 | 14.57536400 | -0.35419600 |
| C | 14.29216500 | 14.80768400 | 0.60492900  |
| C | 16.57927800 | 14.74300500 | 1.14370500  |
| H | 16.96078000 | 13.70481000 | -0.77276800 |
| H | 16.77858900 | 15.46426100 | -0.90553700 |
| C | 15.30833200 | 15.51333600 | 1.47754300  |
| H | 13.45080400 | 15.43759300 | 0.29078600  |
| H | 13.89695200 | 13.90055400 | 1.08303900  |
| H | 17.49942800 | 15.26407300 | 1.42251200  |
| H | 16.57134700 | 13.76497400 | 1.64385200  |
| H | 15.41269200 | 16.56525600 | 1.17866600  |
| H | 15.03479200 | 15.48409200 | 2.53592100  |
| O | 14.96855600 | 11.77760800 | -1.81855800 |
| C | 15.77271200 | 10.99654000 | -2.71948000 |
| C | 15.19301600 | 11.22084100 | -0.51657700 |
| C | 15.68000700 | 9.56378600  | -2.19082400 |
| H | 15.37561200 | 11.15135200 | -3.72810300 |
| H | 16.80169200 | 11.38453800 | -2.69267300 |
| C | 15.12777500 | 9.72342000  | -0.76057900 |
| H | 16.19176300 | 11.53401400 | -0.16545600 |
| H | 14.41800200 | 11.60189400 | 0.15933200  |
| H | 16.66308300 | 9.08316100  | -2.20321100 |
| H | 15.01300000 | 8.95101700  | -2.80623800 |
| H | 15.69319800 | 9.15732300  | -0.01501100 |
| H | 14.08365300 | 9.39282400  | -0.70791100 |
| O | 13.32671800 | 12.68560900 | -3.98641700 |

|   |             |             |             |
|---|-------------|-------------|-------------|
| C | 12.53467900 | 11.46928200 | -3.93132000 |
| C | 13.48202900 | 13.10899700 | -5.36254200 |
| C | 12.48696200 | 10.97447500 | -5.35969300 |
| H | 13.01758500 | 10.79058800 | -3.21720000 |
| H | 11.53306600 | 11.71804400 | -3.56089600 |
| C | 12.46409300 | 12.29128900 | -6.12804500 |
| H | 13.33400000 | 14.19567800 | -5.39925500 |
| H | 14.51468600 | 12.90018200 | -5.67441200 |
| H | 11.60226300 | 10.35447300 | -5.53626000 |
| H | 13.38751100 | 10.39487000 | -5.61074000 |
| H | 11.46398700 | 12.74073600 | -6.04459600 |
| H | 12.72142200 | 12.19217200 | -7.18658700 |
| C | 8.71992500  | 10.92436000 | -6.63535800 |
| H | 7.67612600  | 11.02451900 | -6.96167100 |
| H | 9.33348500  | 11.44778500 | -7.38133500 |
| H | 8.97235300  | 9.85814300  | -6.68623300 |

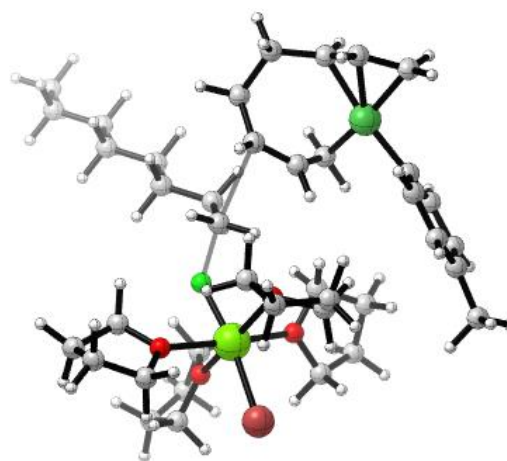

**TS3-4-Me-Ph**

|    |            |             |             |
|----|------------|-------------|-------------|
| Ni | 8.42933400 | 10.94632000 | -0.38213100 |
| C  | 7.32872800 | 9.41168700  | 0.11738700  |
| C  | 7.82217700 | 10.06101100 | 1.26982600  |
| C  | 7.66543800 | 11.44983100 | 1.44180700  |
| C  | 8.41420300 | 12.15857700 | 2.53688500  |

|    |             |             |             |   |             |             |             |
|----|-------------|-------------|-------------|---|-------------|-------------|-------------|
| C  | 9.46587200  | 13.21327900 | 2.09431800  | C | 15.68517600 | 18.24845200 | -3.60059000 |
| C  | 10.49683300 | 12.64752400 | 1.17534900  | H | 16.70481700 | 16.40635600 | -2.91077000 |
| C  | 10.15150600 | 12.32109500 | -0.13052000 | H | 16.10928500 | 16.34521100 | -4.58451900 |
| C  | 9.00964100  | 12.76638700 | -0.85377900 | C | 14.20684900 | 18.32803500 | -3.96696600 |
| C  | 9.04460800  | 10.21976100 | -2.02749900 | H | 12.73057900 | 16.73117500 | -3.56377100 |
| C  | 8.78871700  | 10.73636000 | -3.31025100 | H | 13.39893500 | 17.50853100 | -2.10819600 |
| C  | 9.47451000  | 10.31589300 | -4.44729800 | H | 16.34318600 | 18.76459400 | -4.30510400 |
| C  | 10.48745900 | 9.35727000  | -4.36679500 | H | 15.85081200 | 18.67513600 | -2.60142300 |
| C  | 10.72973500 | 8.79206800  | -3.11519700 | H | 14.07312800 | 18.12168900 | -5.03762600 |
| C  | 10.02213800 | 9.20856500  | -1.98784900 | H | 13.74595900 | 19.29471500 | -3.74562500 |
| H  | 6.34473600  | 9.67592600  | -0.27882000 | O | 15.90473300 | 14.59611000 | -0.92048700 |
| H  | 7.62133300  | 8.38083600  | -0.07183600 | C | 17.20043100 | 13.97366700 | -0.79705400 |
| H  | 8.60941500  | 9.57015400  | 1.85263000  | C | 15.75965800 | 15.64258400 | 0.05765700  |
| H  | 6.72337200  | 11.91074200 | 1.12427100  | C | 17.71913700 | 14.43578300 | 0.54902200  |
| H  | 8.95139300  | 11.40783300 | 3.13770100  | H | 17.07242600 | 12.88989200 | -0.88773300 |
| H  | 7.70739600  | 12.64839400 | 3.22359400  | H | 17.83282600 | 14.30522700 | -1.63144400 |
| H  | 8.93568900  | 14.05674400 | 1.61733500  | C | 17.14962800 | 15.84621800 | 0.62501100  |
| H  | 9.92952700  | 13.62327900 | 3.00342000  | H | 15.33755000 | 16.52274600 | -0.44027000 |
| H  | 11.31401200 | 12.08776000 | 1.64064800  | H | 15.04258800 | 15.31043500 | 0.82286100  |
| H  | 10.89610800 | 11.75673700 | -0.70797600 | H | 18.80955900 | 14.39192500 | 0.61755400  |
| H  | 9.10484800  | 12.87565100 | -1.93612900 | H | 17.29989800 | 13.81509800 | 1.35284400  |
| H  | 8.37415200  | 13.52247400 | -0.38637100 | H | 17.73042700 | 16.52239400 | -0.01750200 |
| H  | 8.02117600  | 11.50522500 | -3.42964400 | H | 17.13449700 | 16.26669700 | 1.63456300  |
| H  | 9.22823400  | 10.74714400 | -5.42140200 | O | 13.57799900 | 12.33395100 | -1.76465400 |
| H  | 11.49071800 | 8.01290200  | -3.02392400 | C | 13.26457900 | 11.26877200 | -2.70884500 |
| H  | 10.25198600 | 8.72557100  | -1.03265400 | C | 14.15071900 | 11.75830100 | -0.57964100 |
| C  | 11.99008000 | 14.38606600 | -0.10928200 | C | 13.76722700 | 9.98778400  | -2.06060600 |
| H  | 12.58974400 | 14.16942700 | 0.77098300  | H | 12.17863200 | 11.24532600 | -2.88048700 |
| H  | 11.86979500 | 13.57529100 | -0.80699500 | H | 13.79501100 | 11.50498800 | -3.63895700 |
| F  | 13.25616400 | 15.13376200 | -1.04833000 | C | 14.80993000 | 10.48699900 | -1.06648300 |
| Mg | 14.35798100 | 14.22603800 | -2.40294000 | H | 14.83182300 | 12.50246500 | -0.14384800 |
| Br | 16.05449600 | 13.18662700 | -3.90861800 | H | 13.34372800 | 11.55312800 | 0.14359300  |
| O  | 14.66704900 | 16.20617200 | -3.10248400 | H | 14.16534800 | 9.28848300  | -2.80227700 |
| C  | 15.90860600 | 16.74924500 | -3.58198300 | H | 12.94317100 | 9.48806300  | -1.53499400 |
| C  | 13.62842100 | 17.19790700 | -3.13863200 | H | 15.74915800 | 10.73009300 | -1.58154800 |

|   |             |             |             |
|---|-------------|-------------|-------------|
| H | 15.01653000 | 9.77779800  | -0.25958900 |
| O | 12.73482900 | 14.19918100 | -3.78763300 |
| C | 11.33373600 | 13.99423200 | -3.51332200 |
| C | 12.95961900 | 14.24932600 | -5.21215700 |
| C | 10.72199800 | 13.65121900 | -4.85454500 |
| H | 11.21922100 | 13.19800400 | -2.76802500 |
| H | 10.92138700 | 14.92604000 | -3.09252500 |
| C | 11.58478400 | 14.47093600 | -5.80576700 |
| H | 13.69395600 | 15.04141800 | -5.40293200 |
| H | 13.39689800 | 13.29459800 | -5.53668500 |
| H | 9.65220100  | 13.87639700 | -4.89691400 |
| H | 10.84722000 | 12.57650700 | -5.04980900 |
| H | 11.30896800 | 15.53416500 | -5.75941700 |
| H | 11.52302500 | 14.14651500 | -6.84829300 |
| C | 10.99944800 | 15.48929000 | -0.06342700 |
| H | 11.02594700 | 16.00254700 | -1.03783400 |
| H | 9.99033900  | 15.05543400 | 0.01103200  |
| C | 11.25740900 | 16.48444800 | 1.05444200  |
| H | 11.28823600 | 15.94511900 | 2.01534100  |
| H | 12.25772900 | 16.92922400 | 0.91687000  |
| C | 10.20818100 | 17.57994700 | 1.12257400  |
| H | 10.15705300 | 18.10229000 | 0.15257300  |
| H | 9.21667300  | 17.11985300 | 1.26590600  |
| C | 10.46291100 | 18.59054400 | 2.22839700  |
| H | 11.45486100 | 19.05036200 | 2.08394600  |
| H | 10.51663500 | 18.06595700 | 3.19633300  |
| C | 9.40654000  | 19.68048800 | 2.30314400  |
| H | 8.41561900  | 19.22016700 | 2.44875200  |
| H | 9.34998100  | 20.20461000 | 1.33457600  |
| C | 9.65970200  | 20.69236700 | 3.40968900  |
| H | 10.64962200 | 21.15070000 | 3.26147000  |
| H | 9.71654800  | 20.16535200 | 4.37424600  |
| C | 8.59290300  | 21.77169900 | 3.47192400  |
| H | 7.60151400  | 21.33447500 | 3.64443300  |
| H | 8.78216900  | 22.49263200 | 4.27417200  |

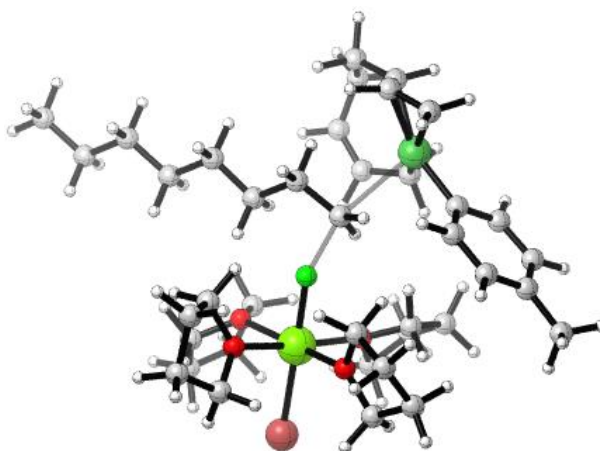

**TS10-4-Me-Ph**

|    |             |             |             |
|----|-------------|-------------|-------------|
| Ni | 8.36161200  | 11.86417600 | 0.10515700  |
| C  | 6.70571100  | 11.54508700 | -0.93609600 |
| C  | 6.41248300  | 11.52394000 | 0.44176300  |
| C  | 6.84007600  | 12.57784700 | 1.26046000  |
| C  | 6.64086000  | 12.60603100 | 2.74146300  |
| C  | 7.75772200  | 13.33876200 | 3.50836500  |
| C  | 9.01562700  | 12.54163000 | 3.65122200  |
| C  | 9.86196900  | 12.27969800 | 2.63989600  |
| C  | 9.74706500  | 12.68613300 | 1.23344300  |
| C  | 9.43168400  | 11.66112900 | -1.46867900 |
| C  | 10.23705100 | 12.73429400 | -1.89497900 |
| C  | 11.02901700 | 12.68320400 | -3.04008400 |
| C  | 11.08076500 | 11.53703900 | -3.83415700 |
| C  | 10.25631500 | 10.47403600 | -3.46608400 |
| C  | 9.44977800  | 10.55098400 | -2.33139100 |
| H  | 6.60821200  | 12.47777200 | -1.49678500 |

|    |             |             |             |   |             |            |             |
|----|-------------|-------------|-------------|---|-------------|------------|-------------|
| H  | 6.51488000  | 10.65275200 | -1.52965800 | H | 11.80927200 | 6.28741600 | 4.54459700  |
| H  | 6.13835600  | 10.57752800 | 0.91935000  | H | 12.66814200 | 5.53324900 | 3.16572100  |
| H  | 6.86943600  | 13.57857100 | 0.80444900  | C | 14.05073500 | 8.29583900 | 4.33346300  |
| H  | 6.53525500  | 11.58113900 | 3.13470700  | H | 12.71100100 | 9.54732000 | 3.06361900  |
| H  | 5.68669700  | 13.11053300 | 2.96245800  | H | 11.95507700 | 8.87091000 | 4.52976200  |
| H  | 7.95862000  | 14.28548300 | 2.97954300  | H | 14.77539600 | 6.27609100 | 3.97161800  |
| H  | 7.38124900  | 13.62002500 | 4.50004500  | H | 13.95030900 | 6.44977900 | 5.53664700  |
| H  | 9.23832400  | 12.13341800 | 4.63936400  | H | 14.86309000 | 8.53778700 | 3.63882500  |
| H  | 10.72924700 | 11.65310900 | 2.89012500  | H | 14.24378600 | 8.81441000 | 5.27738800  |
| H  | 10.72870400 | 12.60778900 | 0.74443300  | O | 11.44896100 | 5.49818700 | 1.04468300  |
| H  | 9.42373700  | 13.74084800 | 1.16308100  | C | 10.11955100 | 5.25016700 | 1.52774800  |
| H  | 11.64038600 | 13.54604500 | -3.31285200 | C | 11.99970200 | 4.30538000 | 0.45216700  |
| H  | 10.23501700 | 9.57449700  | -4.08880100 | C | 9.67789100  | 3.99278600 | 0.80741200  |
| C  | 9.48533500  | 9.65436400  | 0.88723300  | H | 10.15748100 | 5.09709300 | 2.61985200  |
| H  | 10.37269500 | 10.25347000 | 1.05159400  | H | 9.52644100  | 6.14423500 | 1.31803500  |
| F  | 10.50660800 | 8.08003100  | 0.76687300  | C | 10.98498500 | 3.21200500 | 0.73652300  |
| Mg | 12.33866500 | 7.46814200  | 0.81960900  | H | 12.12821800 | 4.49640700 | -0.62418100 |
| Br | 14.68675400 | 6.59683500  | 0.87955400  | H | 12.99178800 | 4.12535800 | 0.88110000  |
| O  | 13.01982900 | 9.49428100  | 0.47217000  | H | 9.32304800  | 4.23850900 | -0.20285400 |
| C  | 14.27983000 | 10.05224300 | 0.87207100  | H | 8.87544500  | 3.46370400 | 1.32961400  |
| C  | 12.62477600 | 10.22906900 | -0.70828700 | H | 10.99131200 | 2.42747300 | -0.02540900 |
| C  | 14.03552800 | 11.53778200 | 0.74330300  | H | 11.19398400 | 2.74192600 | 1.70649600  |
| H  | 14.51449000 | 9.68982700  | 1.87638200  | O | 12.15821900 | 7.15293300 | -1.27435200 |
| H  | 15.06884200 | 9.70120300  | 0.18766900  | C | 10.86839700 | 7.11465900 | -1.91378800 |
| C  | 13.28211800 | 11.60898200 | -0.58634900 | C | 13.20835900 | 7.02244700 | -2.25077600 |
| H  | 12.97795400 | 9.68531300  | -1.59746700 | C | 11.14502100 | 6.61575800 | -3.31671500 |
| H  | 11.53114600 | 10.26664800 | -0.74315800 | H | 10.21469200 | 6.46921000 | -1.31658100 |
| H  | 14.95512900 | 12.12994700 | 0.75608800  | H | 10.44971500 | 8.13088500 | -1.91617900 |
| H  | 13.39390500 | 11.87689300 | 1.56939400  | C | 12.51905200 | 7.21778700 | -3.58729300 |
| H  | 13.97325300 | 11.77625600 | -1.42111300 | H | 13.98548000 | 7.76248000 | -2.02609600 |
| H  | 12.53748000 | 12.40992600 | -0.61541200 | H | 13.65741900 | 6.02388700 | -2.15223300 |
| O  | 12.29590100 | 7.54085600  | 2.98800000  | H | 10.37817100 | 6.93394700 | -4.03013800 |
| C  | 12.62324200 | 6.41522000  | 3.81050400  | H | 11.19889700 | 5.51843500 | -3.33646200 |
| C  | 12.70316700 | 8.68436300  | 3.74133700  | H | 12.41743200 | 8.28906900 | -3.81376500 |
| C  | 13.94593700 | 6.76657100  | 4.48899700  | H | 13.05761800 | 6.74138100 | -4.41136500 |

|   |             |             |             |
|---|-------------|-------------|-------------|
| H | 10.26600400 | 13.65054700 | -1.30070800 |
| H | 9.16919500  | 9.51030900  | -0.13502200 |
| C | 8.59307200  | 9.29566700  | 2.01240300  |
| H | 7.86086400  | 8.54878000  | 1.67001000  |
| H | 8.02132400  | 10.20251500 | 2.26781800  |
| C | 9.28435600  | 8.83316900  | 3.28531100  |
| H | 9.99143100  | 9.61681000  | 3.59987500  |
| H | 9.88159500  | 7.93420600  | 3.08722400  |
| C | 8.29508300  | 8.56775600  | 4.40569800  |
| H | 7.74028900  | 9.49173500  | 4.63754300  |
| H | 7.54022800  | 7.83875600  | 4.06554500  |
| C | 8.96282800  | 8.04480300  | 5.66590200  |
| H | 9.54801300  | 7.14146300  | 5.41649400  |
| H | 9.69545700  | 8.78693900  | 6.02689100  |
| C | 7.98336200  | 7.71742000  | 6.78079900  |
| H | 7.39902100  | 8.61783100  | 7.03102900  |
| H | 7.24940600  | 6.98010100  | 6.41542100  |
| C | 8.65100700  | 7.18254700  | 8.03774200  |
| H | 9.24144800  | 6.28951000  | 7.78074400  |
| H | 9.37603200  | 7.92419100  | 8.40616200  |
| C | 7.65322200  | 6.84531500  | 9.13223900  |
| H | 8.14343300  | 6.46224300  | 10.03338400 |
| H | 7.07161700  | 7.72991000  | 9.42043900  |
| H | 6.93970300  | 6.08412100  | 8.79234800  |
| H | 8.80059800  | 9.69324100  | -2.12509700 |
| C | 12.00371600 | 11.44675700 | -5.01296400 |
| H | 11.66730100 | 10.69064000 | -5.73232000 |
| H | 12.08024500 | 12.40351500 | -5.54265800 |
| H | 13.02433500 | 11.17122900 | -4.70835400 |

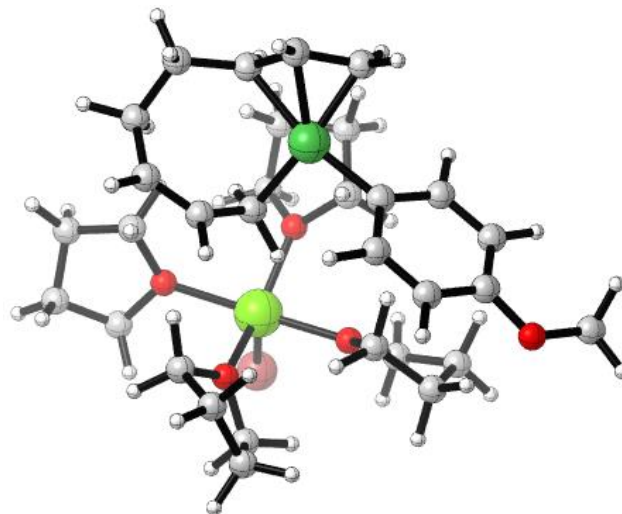

### INT1-4-OMe-Ph

|    |             |             |             |
|----|-------------|-------------|-------------|
| Ni | 9.74286900  | 13.36216800 | -0.92246300 |
| C  | 7.91019900  | 14.05370400 | -1.05835000 |
| C  | 8.31117100  | 13.94957800 | 0.28712600  |
| C  | 9.51200300  | 14.53415800 | 0.73187600  |
| C  | 9.99874100  | 14.30062300 | 2.12982200  |
| C  | 11.49445600 | 13.93821700 | 2.23814900  |
| C  | 11.76866800 | 12.55386800 | 1.74708000  |
| C  | 11.78593200 | 12.21149300 | 0.43959300  |
| C  | 11.67918200 | 13.09367800 | -0.72180300 |
| C  | 9.63117700  | 12.46848100 | -2.58653600 |
| C  | 9.25664100  | 13.05420700 | -3.80490200 |
| C  | 9.20550100  | 12.36240500 | -5.02118200 |
| C  | 9.50271000  | 11.00315100 | -5.04122100 |
| C  | 9.84544100  | 10.36183500 | -3.85038300 |
| C  | 9.91304900  | 11.08813600 | -2.66767300 |
| H  | 8.02480900  | 15.00196600 | -1.59439900 |
| H  | 7.07449900  | 13.44972800 | -1.40402000 |
| H  | 7.87648100  | 13.15941700 | 0.90804200  |
| H  | 9.79251900  | 15.51164500 | 0.31272800  |
| H  | 9.41499500  | 13.48919600 | 2.59122900  |
| H  | 9.81780300  | 15.19758300 | 2.74333500  |
| H  | 12.05477500 | 14.69737100 | 1.66864300  |
| H  | 11.81502800 | 14.04270900 | 3.28447900  |

|    |             |             |             |   |             |             |             |
|----|-------------|-------------|-------------|---|-------------|-------------|-------------|
| H  | 11.77448900 | 11.76167000 | 2.49661500  | H | 15.20717300 | 14.81374500 | 2.66847800  |
| H  | 11.84034700 | 11.13848600 | 0.21623900  | O | 15.00679400 | 11.92675900 | -2.08337500 |
| H  | 12.12606600 | 12.62581300 | -1.61881000 | C | 15.69834000 | 11.06356500 | -3.00237400 |
| H  | 12.12303500 | 14.08626000 | -0.54807100 | C | 14.77518800 | 11.15768300 | -0.89593900 |
| H  | 8.99405400  | 14.11592100 | -3.82737500 | C | 15.17458500 | 9.65142900  | -2.70501000 |
| H  | 8.92173300  | 12.88933000 | -5.93021900 | H | 15.49153800 | 11.43211300 | -4.01306700 |
| H  | 10.06764000 | 9.29587300  | -3.88514600 | H | 16.77822400 | 11.16405500 | -2.82035500 |
| H  | 10.22014200 | 10.55216000 | -1.76434900 | C | 14.30982100 | 9.82391700  | -1.44273600 |
| Mg | 14.55416500 | 13.90585600 | -2.55887500 | H | 15.72673000 | 11.06275400 | -0.34531900 |
| Br | 16.54367900 | 14.75541200 | -3.68498200 | H | 14.03964700 | 11.68342500 | -0.27678900 |
| O  | 13.18316800 | 15.43277600 | -2.57739100 | H | 16.00672400 | 8.96239600  | -2.52874700 |
| C  | 13.47858500 | 16.73814700 | -2.05568100 | H | 14.59239400 | 9.24997700  | -3.54097900 |
| C  | 11.82233600 | 15.41477300 | -3.09191400 | H | 14.43114300 | 9.00846500  | -0.72442200 |
| C  | 12.13939100 | 17.21253300 | -1.53799800 | H | 13.24352000 | 9.89194400  | -1.69807700 |
| H  | 14.27186300 | 16.62056000 | -1.30764600 | O | 13.62570900 | 13.12625900 | -4.26142200 |
| H  | 13.86174000 | 17.37462700 | -2.86750300 | C | 12.70915600 | 12.00438700 | -4.34306000 |
| C  | 11.20501700 | 16.73743800 | -2.65001000 | C | 13.83472400 | 13.68088500 | -5.58277100 |
| H  | 11.86261600 | 15.30027700 | -4.18291300 | C | 12.74945600 | 11.59735300 | -5.79729200 |
| H  | 11.30654700 | 14.54921000 | -2.65445700 | H | 13.05329600 | 11.24288800 | -3.63524500 |
| H  | 12.10103300 | 18.29246700 | -1.36998700 | H | 11.71228300 | 12.34313600 | -4.03694700 |
| H  | 11.90001100 | 16.70173200 | -0.59410400 | C | 12.83154400 | 12.96438100 | -6.46614200 |
| H  | 11.19937500 | 17.46367300 | -3.47188100 | H | 13.70544800 | 14.76827600 | -5.52254600 |
| H  | 10.17217000 | 16.60179300 | -2.31230600 | H | 14.87442400 | 13.47971600 | -5.87418900 |
| O  | 15.22196200 | 14.34148600 | -0.59091000 | H | 11.87456700 | 11.00588700 | -6.08551100 |
| C  | 16.63450600 | 14.20358000 | -0.29518300 | H | 13.65603400 | 11.01182400 | -6.01325000 |
| C  | 14.49061700 | 14.60333800 | 0.62834600  | H | 11.84760400 | 13.45204600 | -6.41200200 |
| C  | 16.70923500 | 14.10502900 | 1.21485300  | H | 13.14861100 | 12.93425100 | -7.51255700 |
| H  | 17.01028900 | 13.32492300 | -0.83153100 | O | 9.53200400  | 10.22535200 | -6.17391100 |
| H  | 17.15375900 | 15.08707000 | -0.68630900 | C | 9.15612400  | 10.83846900 | -7.37631400 |
| C  | 15.54447200 | 14.98834000 | 1.64254500  | H | 9.82796600  | 11.67220400 | -7.64136900 |
| H  | 13.76189900 | 15.39455900 | 0.41958900  | H | 9.21894600  | 10.07473800 | -8.15524800 |
| H  | 13.94569500 | 13.69406600 | 0.92443300  | H | 8.12736100  | 11.22614700 | -7.33650900 |
| H  | 17.67808600 | 14.43260000 | 1.60227400  |   |             |             |             |
| H  | 16.53957200 | 13.07208400 | 1.54665500  |   |             |             |             |
| H  | 15.81258300 | 16.04833600 | 1.54183400  |   |             |             |             |



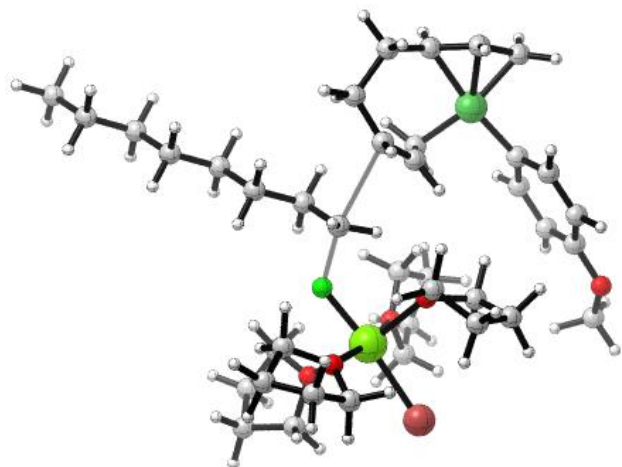

**TS3-4-OMe-Ph**

|    |             |             |             |
|----|-------------|-------------|-------------|
| Ni | 8.29430900  | 11.24102100 | -0.39813700 |
| C  | 7.09761300  | 9.80914500  | 0.18203100  |
| C  | 7.55077300  | 10.55458800 | 1.29052700  |
| C  | 7.44966200  | 11.96050000 | 1.30722300  |
| C  | 8.17099100  | 12.74760200 | 2.36726900  |
| C  | 9.27139600  | 13.72916900 | 1.88127200  |
| C  | 10.33521700 | 13.05109200 | 1.08224500  |
| C  | 10.05026300 | 12.60279100 | -0.20080800 |
| C  | 8.95389500  | 12.98793800 | -1.02249100 |
| C  | 9.03566100  | 10.29040900 | -1.87455300 |
| C  | 9.03294600  | 10.66780200 | -3.22396200 |
| C  | 9.85076900  | 10.08197400 | -4.19805100 |
| C  | 10.73185200 | 9.06800800  | -3.83058900 |
| C  | 10.73333500 | 8.61817900  | -2.51029000 |
| C  | 9.90186000  | 9.21821200  | -1.57210000 |
| H  | 6.15473200  | 10.07026600 | -0.30554500 |
| H  | 7.35485300  | 8.75380800  | 0.11631400  |
| H  | 8.27929100  | 10.09548400 | 1.96812200  |
| H  | 6.54348400  | 12.42162300 | 0.89857700  |
| H  | 8.65960900  | 12.04252300 | 3.05800100  |
| H  | 7.44953200  | 13.31628100 | 2.97348200  |
| H  | 8.78954800  | 14.53167300 | 1.29503200  |
| H  | 9.69690600  | 14.21815400 | 2.77039000  |
| H  | 11.11155600 | 12.52454800 | 1.64458600  |
| H  | 10.80639300 | 11.96538700 | -0.67643000 |
| H  | 9.10220200  | 12.97849700 | -2.10402000 |
| H  | 8.32070600  | 13.80557700 | -0.66821500 |
| H  | 9.78520500  | 10.41868900 | -5.23155100 |
| H  | 11.39989100 | 7.79720500  | -2.24687800 |
| C  | 11.97752800 | 14.58177200 | -0.27566000 |
| H  | 11.82434200 | 13.74406100 | -0.93437400 |
| F  | 13.31446400 | 15.20761500 | -1.20117300 |
| Mg | 14.35285900 | 14.20924600 | -2.55544900 |
| Br | 15.94146000 | 13.05766000 | -4.09247400 |
| O  | 14.75760500 | 16.15289300 | -3.30396500 |
| C  | 16.02934400 | 16.59105500 | -3.81345200 |
| C  | 13.81367900 | 17.23502500 | -3.28885200 |
| C  | 15.94171800 | 18.10391200 | -3.80422100 |
| H  | 16.80946700 | 16.16454500 | -3.17228300 |
| H  | 16.16254000 | 16.18653100 | -4.82668000 |
| C  | 14.46525500 | 18.32339300 | -4.11932000 |
| H  | 12.86275800 | 16.86034800 | -3.68879400 |
| H  | 13.64702700 | 17.54652800 | -2.24706900 |
| H  | 16.62068800 | 18.56968000 | -4.52379800 |
| H  | 16.17823700 | 18.49809100 | -2.80604800 |
| H  | 14.27885300 | 18.14971800 | -5.18782400 |
| H  | 14.10150100 | 19.32335600 | -3.86717000 |
| O  | 15.92724600 | 14.50841200 | -1.08906800 |
| C  | 17.18796000 | 13.81541200 | -0.97367500 |
| C  | 15.87054600 | 15.59618600 | -0.14692800 |
| C  | 17.76571200 | 14.29065600 | 0.34302700  |
| H  | 16.99454700 | 12.73885100 | -1.02287300 |
| H  | 17.81865500 | 14.08187300 | -1.83240000 |
| C  | 17.28420600 | 15.73479400 | 0.38013900  |
| H  | 15.49332500 | 16.48444000 | -0.66526800 |
| H  | 15.15534500 | 15.33810600 | 0.64775600  |
| H  | 18.85284600 | 14.18279400 | 0.38915200  |
| H  | 17.32913100 | 13.72538700 | 1.17779500  |
| H  | 17.88770100 | 16.35217100 | -0.29971800 |

|   |             |             |             |   |             |             |             |
|---|-------------|-------------|-------------|---|-------------|-------------|-------------|
| H | 17.31970400 | 16.19061900 | 1.37371700  | C | 10.36853500 | 17.92677700 | 0.77664600  |
| O | 13.50341900 | 12.39512300 | -1.82639000 | H | 10.46866200 | 18.44450200 | -0.19212700 |
| C | 13.06981800 | 11.32719800 | -2.70687100 | H | 9.32780600  | 17.56532600 | 0.81578400  |
| C | 14.06612000 | 11.76160400 | -0.67307100 | C | 10.60383900 | 18.91573800 | 1.90605200  |
| C | 13.97119200 | 10.12879800 | -2.39945600 | H | 11.64961100 | 19.26451900 | 1.87713500  |
| H | 12.01370100 | 11.10545500 | -2.48967700 | H | 10.48952100 | 18.39857000 | 2.87251700  |
| H | 13.16110600 | 11.70416500 | -3.73108700 | C | 9.67073200  | 20.11444100 | 1.86080000  |
| C | 14.86672100 | 10.61234000 | -1.25114200 | H | 8.62538700  | 19.76558500 | 1.88338100  |
| H | 14.64630700 | 12.52000000 | -0.13161200 | H | 9.78850600  | 20.63481800 | 0.89574800  |
| H | 13.24683700 | 11.40760100 | -0.02458300 | C | 9.89813400  | 21.10062600 | 2.99571300  |
| H | 14.55996200 | 9.83089600  | -3.27184200 | H | 10.94469500 | 21.44138900 | 2.97469600  |
| H | 13.35802000 | 9.27377200  | -2.09594600 | H | 9.77334600  | 20.57986200 | 3.95710800  |
| H | 15.81425800 | 10.99210900 | -1.65377400 | C | 8.96305500  | 22.29569600 | 2.92933400  |
| H | 15.08146800 | 9.83361700  | -0.51340200 | H | 7.91425400  | 21.97714700 | 2.97681500  |
| O | 12.69529000 | 14.22914400 | -3.92082900 | H | 9.13401400  | 22.99911700 | 3.75097100  |
| C | 11.29494300 | 14.06406900 | -3.62187700 | H | 9.09343400  | 22.84521800 | 1.98852100  |
| C | 12.89457100 | 14.29921100 | -5.34826700 | H | 9.94055500  | 8.83718600  | -0.54796200 |
| C | 10.65057300 | 13.72209800 | -4.94742700 | O | 11.62761500 | 8.46555800  | -4.67544500 |
| H | 11.17342600 | 13.28010300 | -2.86633000 | C | 11.79560000 | 9.04089600  | -5.93971600 |
| H | 10.90845300 | 15.00820000 | -3.20449500 | H | 12.08699000 | 10.10331100 | -5.86823400 |
| C | 11.50943100 | 14.52192000 | -5.92018100 | H | 12.59647500 | 8.48857500  | -6.43769000 |
| H | 13.62115600 | 15.09775700 | -5.54325300 | H | 10.88616800 | 8.97394400  | -6.55589400 |
| H | 13.33574200 | 13.35308700 | -5.69187700 |   |             |             |             |
| H | 9.58656900  | 13.97424900 | -4.97185500 |   |             |             |             |
| H | 10.74838900 | 12.64234400 | -5.13303400 |   |             |             |             |
| H | 11.23897000 | 15.58654700 | -5.88105500 |   |             |             |             |
| H | 11.42916700 | 14.18837300 | -6.95862400 |   |             |             |             |
| H | 8.36461100  | 11.46767700 | -3.55296300 |   |             |             |             |
| C | 11.05575200 | 15.74544300 | -0.30953500 |   |             |             |             |
| H | 10.01776200 | 15.37889700 | -0.29765400 |   |             |             |             |
| H | 11.18005300 | 16.24262100 | -1.28507700 |   |             |             |             |
| H | 12.53682400 | 14.36820100 | 0.63139000  |   |             |             |             |
| C | 11.30882600 | 16.73549300 | 0.81330800  |   |             |             |             |
| H | 11.20527200 | 16.21079400 | 1.77675200  |   |             |             |             |
| H | 12.35610600 | 17.07917200 | 0.75617800  |   |             |             |             |

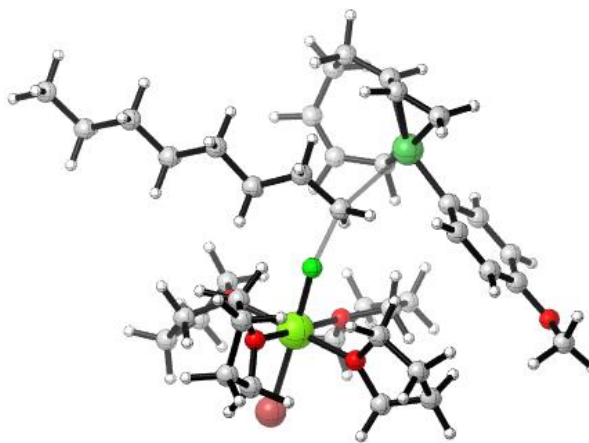

**TS10-4-OMe-Ph**

|    |             |             |             |   |             |             |             |
|----|-------------|-------------|-------------|---|-------------|-------------|-------------|
|    |             |             |             | O | 13.03725700 | 9.36281000  | 0.56446900  |
| Ni | 8.40688100  | 11.73024500 | 0.09059900  | C | 14.29461800 | 9.89475600  | 1.00822700  |
| C  | 6.73501800  | 11.44016500 | -0.93662400 | C | 12.66333700 | 10.14046300 | -0.59714000 |
| C  | 6.44863400  | 11.45931600 | 0.44164800  | C | 14.07936400 | 11.38625600 | 0.90216300  |
| C  | 6.91537400  | 12.51592200 | 1.23594400  | H | 14.49676100 | 9.51042100  | 2.01173700  |
| C  | 6.72180200  | 12.57622600 | 2.71686100  | H | 15.09752100 | 9.54383900  | 0.34057600  |
| C  | 7.85840100  | 13.29366300 | 3.46814900  | C | 13.36297900 | 11.49573800 | -0.44429100 |
| C  | 9.09361600  | 12.46383600 | 3.61966700  | H | 12.99469900 | 9.60992100  | -1.50114600 |
| C  | 9.92565600  | 12.15378000 | 2.61028500  | H | 11.57171000 | 10.21573100 | -0.62724500 |
| C  | 9.82149200  | 12.53312300 | 1.19505000  | H | 15.00878600 | 11.96107500 | 0.94906200  |
| C  | 9.46466900  | 11.45006900 | -1.48466400 | H | 13.42347500 | 11.72199000 | 1.71800500  |
| C  | 10.33672100 | 12.46536500 | -1.92928100 | H | 14.08097900 | 11.64819300 | -1.25828200 |
| C  | 11.08923200 | 12.37336900 | -3.09460200 | H | 12.64793300 | 12.32294000 | -0.48126500 |
| C  | 11.00598000 | 11.23566400 | -3.89642700 | O | 12.22518700 | 7.39919900  | 3.06381600  |
| C  | 10.14044600 | 10.21169800 | -3.52148600 | C | 12.48345600 | 6.24914000  | 3.87726000  |
| C  | 9.39359100  | 10.34469900 | -2.34582500 | C | 12.64590900 | 8.51498000  | 3.85015100  |
| H  | 6.67139800  | 12.36316100 | -1.51783500 | C | 13.79016900 | 6.54493800  | 4.61204400  |
| H  | 6.51074700  | 10.54235600 | -1.50991000 | H | 11.63674400 | 6.13584200  | 4.57613400  |
| H  | 6.14613800  | 10.53293800 | 0.94088200  | H | 12.52434100 | 5.37805500  | 3.21707300  |
| H  | 6.97094400  | 13.50656000 | 0.76086500  | C | 13.95897000 | 8.07037800  | 4.47760800  |
| H  | 6.59442000  | 11.56053000 | 3.12831900  | H | 12.70499100 | 9.38872200  | 3.18972100  |
| H  | 5.78050000  | 13.10673000 | 2.93203000  | H | 11.87916200 | 8.71402400  | 4.61740500  |
| H  | 8.08155300  | 14.22666300 | 2.92422900  | H | 14.62079900 | 6.02821000  | 4.12357700  |
| H  | 7.49278800  | 13.60034000 | 4.45634700  | H | 13.74036300 | 6.21905700  | 5.65572500  |
| H  | 9.30847600  | 12.06668600 | 4.61429000  | H | 14.79997300 | 8.29128200  | 3.81029500  |
| H  | 10.77163900 | 11.50376400 | 2.87187500  | H | 14.14135900 | 8.57043400  | 5.43359600  |
| H  | 10.79725000 | 12.40144000 | 0.70558000  | O | 11.43558800 | 5.34964300  | 1.04487800  |
| H  | 9.54343200  | 13.59848500 | 1.10058700  | C | 10.09239900 | 5.08290600  | 1.47269400  |
| H  | 11.75405200 | 13.17676300 | -3.40829600 | C | 12.00888100 | 4.17727200  | 0.43312800  |
| H  | 10.02166800 | 9.32135900  | -4.13845100 | C | 9.65545000  | 3.89554300  | 0.64074000  |
| C  | 9.47041000  | 9.50878900  | 0.90270400  | H | 10.09748600 | 4.83580200  | 2.54798700  |
| H  | 10.36049100 | 10.10194300 | 1.06708000  | H | 9.51909900  | 6.00073900  | 1.31967600  |
| F  | 10.49226900 | 7.93435200  | 0.82012100  | C | 10.94968500 | 3.09289100  | 0.56144300  |
| Mg | 12.32469500 | 7.33811500  | 0.89923600  | H | 12.24035300 | 4.43100000  | -0.61209000 |
| Br | 14.66267600 | 6.43154700  | 1.03411400  | H | 12.95371900 | 3.94066300  | 0.93485500  |

|   |             |             |             |
|---|-------------|-------------|-------------|
| H | 9.34140200  | 4.22526500  | -0.35912300 |
| H | 8.82475300  | 3.34462800  | 1.09139900  |
| H | 10.97765300 | 2.38191200  | -0.26914700 |
| H | 11.09561500 | 2.52764900  | 1.49093300  |
| O | 12.24251000 | 7.04758100  | -1.20240100 |
| C | 11.00032700 | 6.94696100  | -1.92289700 |
| C | 13.35584200 | 7.02469200  | -2.11247600 |
| C | 11.39740300 | 6.64979900  | -3.35718200 |
| H | 10.39645000 | 6.16507700  | -1.44520400 |
| H | 10.46923500 | 7.90419100  | -1.83751500 |
| C | 12.74452700 | 7.35671300  | -3.45624500 |
| H | 14.10304600 | 7.74025400  | -1.75265500 |
| H | 13.81147800 | 6.02387300  | -2.09369400 |
| H | 10.65603100 | 7.01527500  | -4.07610600 |
| H | 11.52251400 | 5.56943300  | -3.51317100 |
| H | 12.59102200 | 8.44303400  | -3.54469700 |
| H | 13.35991100 | 7.02398500  | -4.29749300 |
| H | 10.44546900 | 13.37671100 | -1.33715100 |
| H | 9.16704300  | 9.34266300  | -0.11980000 |
| C | 8.56722900  | 9.18525800  | 2.02948200  |
| H | 7.81876100  | 8.44800100  | 1.70238700  |
| H | 8.01740200  | 10.11077400 | 2.26602900  |
| C | 9.25178300  | 8.74226500  | 3.31324300  |
| H | 9.98656700  | 9.51473500  | 3.58949200  |
| H | 9.81857200  | 7.81687000  | 3.14421300  |
| C | 8.26429600  | 8.56359800  | 4.45273500  |
| H | 7.67194900  | 9.48558500  | 4.57348400  |
| H | 7.54156100  | 7.77076800  | 4.19744100  |
| C | 8.94222100  | 8.22901000  | 5.77069500  |
| H | 9.60721500  | 7.35811400  | 5.63183100  |
| H | 9.60013400  | 9.06637500  | 6.05992200  |
| C | 7.96631400  | 7.94198400  | 6.89976000  |
| H | 7.28340100  | 8.79887500  | 7.01928100  |
| H | 7.32590300  | 7.08909000  | 6.62060100  |
| C | 8.64591300  | 7.64892000  | 8.22802300  |

|   |             |             |             |
|---|-------------|-------------|-------------|
| H | 9.34263800  | 6.80610400  | 8.09989100  |
| H | 9.26865700  | 8.51055000  | 8.51258900  |
| C | 7.65570100  | 7.33665000  | 9.33661200  |
| H | 8.15510000  | 7.13127200  | 10.28932300 |
| H | 6.96651500  | 8.17516900  | 9.49677700  |
| H | 7.04684300  | 6.45940200  | 9.08407900  |
| H | 8.70649600  | 9.52287200  | -2.11755500 |
| O | 11.79429100 | 11.22133100 | -5.01450600 |
| C | 11.54901600 | 10.21900500 | -5.96198500 |
| H | 10.49818000 | 10.21346300 | -6.28793800 |
| H | 12.18797200 | 10.43351900 | -6.82193600 |
| H | 11.79792800 | 9.21332300  | -5.58478700 |

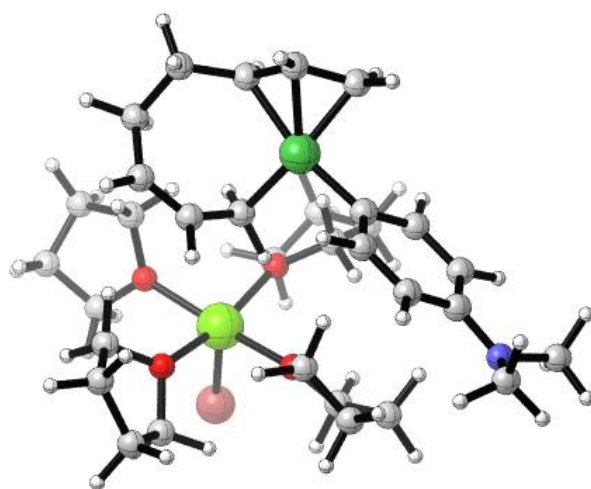

**INT1-4-NMe<sub>2</sub>-Ph**

|    |             |             |             |
|----|-------------|-------------|-------------|
| Ni | 9.57568800  | 13.15894300 | -0.72559800 |
| C  | 7.71287400  | 13.73154500 | -0.54166700 |
| C  | 8.24788400  | 13.34950500 | 0.70346800  |
| C  | 9.46386900  | 13.89315200 | 1.16340600  |
| C  | 10.11519900 | 13.35354000 | 2.40007300  |
| C  | 11.64183700 | 13.17072200 | 2.28472600  |
| C  | 12.01799100 | 12.00810000 | 1.42031200  |
| C  | 11.91162400 | 12.00517200 | 0.07077900  |

|    |             |             |             |   |             |             |             |
|----|-------------|-------------|-------------|---|-------------|-------------|-------------|
| C  | 11.54948500 | 13.11302000 | -0.80399200 | H | 12.07630800 | 17.76634300 | -1.73032600 |
| C  | 9.27299200  | 12.57466100 | -2.50095700 | H | 11.79326700 | 16.86067200 | -4.64592200 |
| C  | 9.05381300  | 13.37331500 | -3.63366000 | H | 10.46333100 | 17.15121900 | -3.50686000 |
| C  | 8.87202100  | 12.86911600 | -4.92176600 | O | 15.02218700 | 14.38426000 | -0.62993600 |
| C  | 8.87794400  | 11.48602200 | -5.16087800 | C | 16.44538400 | 14.53271900 | -0.41868200 |
| C  | 9.01988300  | 10.65518800 | -4.03857100 | C | 14.30283200 | 14.79471000 | 0.55428200  |
| C  | 9.21725100  | 11.19462100 | -2.76838400 | C | 16.59247300 | 14.69108800 | 1.07921100  |
| H  | 7.74737500  | 14.77840900 | -0.86065200 | H | 16.94838700 | 13.65787000 | -0.84478600 |
| H  | 6.87082200  | 13.17310600 | -0.94374600 | H | 16.78738600 | 15.42051500 | -0.96734100 |
| H  | 7.90712300  | 12.41339600 | 1.15826400  | C | 15.33528600 | 15.47874300 | 1.42503900  |
| H  | 9.65593300  | 14.95929100 | 0.97610900  | H | 13.47287300 | 15.44059400 | 0.24260400  |
| H  | 9.66743500  | 12.38068000 | 2.65554200  | H | 13.89224100 | 13.89342900 | 1.03032900  |
| H  | 9.91607900  | 14.02054000 | 3.25441500  | H | 17.52206400 | 15.19696400 | 1.35478900  |
| H  | 12.04846400 | 14.12106300 | 1.90031700  | H | 16.57313700 | 13.71071100 | 1.57444800  |
| H  | 12.06556300 | 13.04387400 | 3.29103100  | H | 15.45466400 | 16.53090600 | 1.13273800  |
| H  | 12.21142000 | 11.06191300 | 1.92837600  | H | 15.06711700 | 15.44663300 | 2.48479600  |
| H  | 12.06486500 | 11.04168500 | -0.43427300 | O | 14.90627700 | 11.75556000 | -1.86847800 |
| H  | 11.88418900 | 12.95347500 | -1.83960200 | C | 15.68250000 | 10.96528100 | -2.78514300 |
| H  | 11.87620500 | 14.09450300 | -0.43375600 | C | 15.14231400 | 11.19135900 | -0.57186200 |
| H  | 9.00230300  | 14.46115400 | -3.51902800 | C | 15.57573800 | 9.53229600  | -2.25962500 |
| H  | 8.71034000  | 13.56960900 | -5.73874500 | H | 15.27077900 | 11.13006500 | -3.78638300 |
| H  | 8.98728900  | 9.57297100  | -4.14632700 | H | 16.71766900 | 11.33738100 | -2.77497500 |
| H  | 9.34872000  | 10.48472000 | -1.94644700 | C | 15.05023200 | 9.69588200  | -0.81950600 |
| Mg | 14.22371200 | 13.65773200 | -2.43549200 | H | 16.15152100 | 11.48684500 | -0.23597200 |
| Br | 16.14772700 | 14.39353500 | -3.80888100 | H | 14.38469000 | 11.58239100 | 0.11856600  |
| O  | 13.05515900 | 15.35690800 | -2.58739700 | H | 16.55038500 | 9.03556800  | -2.29058100 |
| C  | 13.66074400 | 16.66300700 | -2.69322500 | H | 14.88804500 | 8.93313600  | -2.86563300 |
| C  | 11.67901800 | 15.40504600 | -3.04964100 | H | 15.61967500 | 9.11878500  | -0.08551300 |
| C  | 12.48210500 | 17.60930400 | -2.73865900 | H | 14.00240400 | 9.38060600  | -0.75054600 |
| H  | 14.33823600 | 16.78160700 | -1.83824700 | O | 13.23251100 | 12.69021200 | -3.99740800 |
| H  | 14.26394100 | 16.70081500 | -3.61210600 | C | 12.42656700 | 11.48201800 | -3.92737900 |
| C  | 11.49928800 | 16.80992600 | -3.58870700 | C | 13.35888400 | 13.11552600 | -5.37649600 |
| H  | 11.53086400 | 14.60928400 | -3.78979700 | C | 12.34073800 | 10.99427400 | -5.35640800 |
| H  | 11.02552000 | 15.18348900 | -2.19424900 | H | 12.91885200 | 10.79555800 | -3.22717700 |
| H  | 12.74083100 | 18.58303900 | -3.16402900 | H | 11.43869400 | 11.74269600 | -3.52955900 |

|   |             |             |             |   |             |             |             |
|---|-------------|-------------|-------------|---|-------------|-------------|-------------|
| C | 12.31124800 | 12.31408200 | -6.11812300 | C | 10.47580100 | 12.55976400 | 1.20243600  |
| H | 13.22781900 | 14.20469000 | -5.40490100 | C | 10.10500200 | 12.26562400 | -0.10418400 |
| H | 14.37871200 | 12.89023300 | -5.71735900 | C | 8.95822000  | 12.74291200 | -0.79880300 |
| H | 11.44699000 | 10.38582800 | -5.52521400 | C | 8.86390900  | 10.29347700 | -2.07658600 |
| H | 13.23171100 | 10.40944800 | -5.62944500 | C | 8.30566100  | 10.74021100 | -3.28999800 |
| H | 11.31780400 | 12.77168200 | -6.00542100 | C | 8.88406400  | 10.49332100 | -4.52739900 |
| H | 12.53785500 | 12.21561800 | -7.18364500 | C | 10.07869700 | 9.76980200  | -4.62986100 |
| N | 8.78614700  | 10.95766000 | -6.46380500 | C | 10.62507200 | 9.25509700  | -3.45441900 |
| C | 8.40958200  | 9.56873700  | -6.59052600 | C | 10.02217700 | 9.51710800  | -2.21954900 |
| H | 7.43754900  | 9.33281200  | -6.12208700 | H | 6.28927100  | 9.63040700  | -0.22979300 |
| H | 8.35448100  | 9.30594700  | -7.65098800 | H | 7.58045100  | 8.34220800  | -0.07822700 |
| H | 9.16329700  | 8.91311800  | -6.13612900 | H | 8.60473100  | 9.49715600  | 1.84516900  |
| C | 8.29846900  | 11.83388200 | -7.50302100 | H | 6.69918600  | 11.84795800 | 1.20590100  |
| H | 8.98096400  | 12.67927400 | -7.65722100 | H | 8.95617300  | 11.30485800 | 3.17473000  |
| H | 8.25336300  | 11.28208400 | -8.44658100 | H | 7.72189900  | 12.55210500 | 3.29669600  |
| H | 7.29573900  | 12.24795200 | -7.29469200 | H | 8.93786800  | 13.97655500 | 1.69275800  |

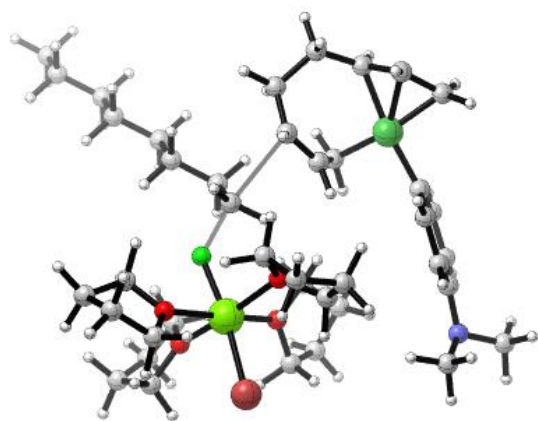

#### TS3-4- NMe<sub>2</sub>-Ph

|    |            |             |             |    |             |             |             |
|----|------------|-------------|-------------|----|-------------|-------------|-------------|
| Ni | 8.36280700 | 10.91928900 | -0.35587500 | Mg | 14.40817200 | 14.09387800 | -2.31253100 |
| C  | 7.28555700 | 9.36726000  | 0.13577400  | Br | 16.13652200 | 13.01204800 | -3.75513300 |
| C  | 7.80275900 | 9.99651400  | 1.29048900  | O  | 14.66308600 | 16.04708500 | -3.09089100 |
| C  | 7.64532700 | 11.37939900 | 1.49933500  | C  | 15.88622400 | 16.60960800 | -3.59383200 |
| C  | 8.41489100 | 12.06731000 | 2.59268700  | C  | 13.59297800 | 17.00284300 | -3.16387600 |
| C  | 9.46749500 | 13.12139200 | 2.14842700  | C  | 15.61504300 | 18.09918600 | -3.66908400 |

|   |             |             |             |   |             |             |             |
|---|-------------|-------------|-------------|---|-------------|-------------|-------------|
| H | 16.69389900 | 16.31671100 | -2.91274600 | O | 12.80245100 | 13.92445700 | -3.70142700 |
| H | 16.09817600 | 16.17603000 | -4.58167100 | C | 11.40046200 | 13.68434300 | -3.44242300 |
| C | 14.13481800 | 18.11754600 | -4.03627200 | C | 13.03826600 | 13.96223700 | -5.12583400 |
| H | 12.71045100 | 16.49099300 | -3.56858400 | C | 10.80133900 | 13.35406800 | -4.79354300 |
| H | 13.35483500 | 17.34519200 | -2.14574500 | H | 11.29612600 | 12.87305400 | -2.71075400 |
| H | 16.25622500 | 18.60891800 | -4.39346700 | H | 10.97031400 | 14.60037600 | -3.00529800 |
| H | 15.76705800 | 18.56809000 | -2.68683200 | C | 11.66938300 | 14.18366400 | -5.73022600 |
| H | 14.00652400 | 17.86641400 | -5.09806600 | H | 13.77411900 | 14.75195400 | -5.31933300 |
| H | 13.64396600 | 19.07710500 | -3.85123700 | H | 13.47289500 | 13.00320100 | -5.44107400 |
| O | 15.98104100 | 14.59862000 | -0.87147300 | H | 9.73226300  | 13.58131400 | -4.83887000 |
| C | 17.30426100 | 14.03777400 | -0.75172600 | H | 10.91998300 | 12.28286500 | -5.01167900 |
| C | 15.80166900 | 15.65685600 | 0.08697200  | H | 11.39268800 | 15.24711600 | -5.68253400 |
| C | 17.81197700 | 14.54048700 | 0.58373500  | H | 11.61749300 | 13.86165200 | -6.77395600 |
| H | 17.22546600 | 12.94935600 | -0.83454500 | C | 11.01789900 | 15.40149200 | -0.06458700 |
| H | 17.91671300 | 14.39139200 | -1.59221100 | H | 11.05948600 | 15.88644500 | -1.05275500 |
| C | 17.18634200 | 15.92817300 | 0.63963000  | H | 10.00584600 | 14.97345800 | 0.00684500  |
| H | 15.33813000 | 16.50768700 | -0.42512900 | C | 11.26537000 | 16.42493300 | 1.02975400  |
| H | 15.10651500 | 15.31004800 | 0.86588600  | H | 11.26876000 | 15.91211900 | 2.00551600  |
| H | 18.90363200 | 14.54183700 | 0.64637400  | H | 12.27411400 | 16.85326100 | 0.90312800  |
| H | 17.42230900 | 13.91671900 | 1.40023300  | C | 10.23180200 | 17.53775100 | 1.04709500  |
| H | 17.73456100 | 16.61542900 | -0.01959200 | H | 10.21129900 | 18.03764300 | 0.06422100  |
| H | 17.16109300 | 16.36618600 | 1.64151300  | H | 9.22977200  | 17.09755400 | 1.17901600  |
| O | 13.70265000 | 12.23202300 | -1.53267500 | C | 10.48060600 | 18.56933700 | 2.13441000  |
| C | 13.46479600 | 11.09292800 | -2.40830300 | H | 11.48470500 | 19.00603100 | 2.00268700  |
| C | 14.29176800 | 11.77754200 | -0.30239000 | H | 10.50156500 | 18.06650300 | 3.11503100  |
| C | 13.88777000 | 9.87563900  | -1.60615000 | C | 9.44571900  | 19.68233100 | 2.15989100  |
| H | 12.40232200 | 11.07401800 | -2.68782400 | H | 8.44212300  | 19.24583700 | 2.29118300  |
| H | 14.09061600 | 11.23839400 | -3.29753300 | H | 9.42350300  | 20.18668100 | 1.17953800  |
| C | 14.93245000 | 10.45427500 | -0.65805500 | C | 9.69443700  | 20.71208400 | 3.25058900  |
| H | 14.99033700 | 12.55282500 | 0.04336300  | H | 10.69732500 | 21.14596500 | 3.11684700  |
| H | 13.49565400 | 11.65814500 | 0.45071900  | H | 9.71658000  | 20.20488000 | 4.22704600  |
| H | 14.27385700 | 9.07917600  | -2.24919300 | C | 8.65033500  | 21.81528300 | 3.26393500  |
| H | 13.03704400 | 9.47378300  | -1.03848300 | H | 7.64570400  | 21.40284700 | 3.42013300  |
| H | 15.87462000 | 10.63140100 | -1.19501500 | H | 8.83514000  | 22.54853900 | 4.05601400  |
| H | 15.13056200 | 9.82749500  | 0.21616400  | H | 8.63502900  | 22.35491800 | 2.30855900  |

|   |             |            |             |   |             |             |             |
|---|-------------|------------|-------------|---|-------------|-------------|-------------|
| N | 10.70157400 | 9.63748700 | -5.90590200 | C | 10.92358900 | 11.24094600 | -3.77659200 |
| C | 9.94428000  | 8.85904700 | -6.86867900 | C | 9.97693800  | 10.27551000 | -3.40775900 |
| H | 10.37004500 | 8.99195900 | -7.87139300 | C | 9.16354900  | 10.46324900 | -2.29801000 |
| H | 9.95173100  | 7.77736400 | -6.63262300 | H | 6.39190400  | 12.44012100 | -1.41040900 |
| H | 8.90229100  | 9.18889700 | -6.89474600 | H | 6.30131200  | 10.61492800 | -1.44656700 |
| C | 12.09053900 | 9.24771800 | -5.89393700 | H | 5.99581000  | 10.53165000 | 1.01292000  |
| H | 12.50187600 | 9.34891300 | -6.90577600 | H | 6.70834900  | 13.53712700 | 0.88408700  |
| H | 12.66370400 | 9.90466400 | -5.22648600 | H | 6.45028400  | 11.52845300 | 3.21398500  |
| H | 12.25796900 | 8.20009000 | -5.57269500 | H | 5.58581700  | 13.05238700 | 3.07156200  |

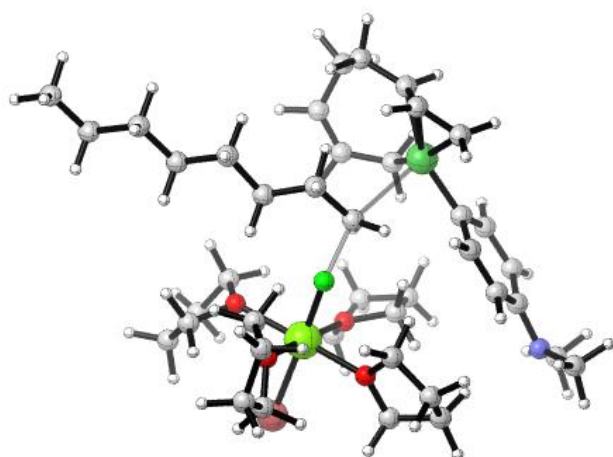

|    |             |             |             |    |             |             |             |
|----|-------------|-------------|-------------|----|-------------|-------------|-------------|
| H  | 7.84739800  | 14.24514700 | 3.03835800  | H  | 10.63009300 | 11.62962000 | 2.85420500  |
| H  | 7.31603800  | 13.56460500 | 4.56903000  | H  | 10.56362700 | 12.58734000 | 0.71602000  |
| H  | 9.18972800  | 12.09339800 | 4.64819700  | H  | 9.26556600  | 13.71604600 | 1.17071700  |
| H  | 10.63009300 | 11.62962000 | 2.85420500  | H  | 11.62266000 | 13.22761700 | -3.28060800 |
| H  | 10.56362700 | 12.58734000 | 0.71602000  | H  | 9.88101400  | 9.35507400  | -3.98338800 |
| H  | 9.26556600  | 13.71604600 | 1.17071700  | C  | 9.35789500  | 9.62671400  | 0.89045100  |
| H  | 11.62266000 | 13.22761700 | -3.28060800 | H  | 10.23467500 | 10.24440900 | 1.03549600  |
| H  | 9.88101400  | 9.35507400  | -3.98338800 | F  | 10.44347500 | 8.08265900  | 0.74132300  |
| C  | 9.35789500  | 9.62671400  | 0.89045100  | Mg | 12.28293400 | 7.50805800  | 0.73888900  |
| H  | 10.23467500 | 10.24440900 | 1.03549600  | Br | 14.64355900 | 6.65463100  | 0.77810200  |
| F  | 10.44347500 | 8.08265900  | 0.74132300  | O  | 12.95025900 | 9.54054100  | 0.39790300  |
| Mg | 12.28293400 | 7.50805800  | 0.73888900  | C  | 14.19729100 | 10.10364500 | 0.82565300  |
| Br | 14.64355900 | 6.65463100  | 0.77810200  | C  | 12.51373500 | 10.34879900 | -0.71782700 |
| O  | 12.95025900 | 9.54054100  | 0.39790300  | C  | 13.91193500 | 11.58748900 | 0.80914900  |
| C  | 14.19729100 | 10.10364500 | 0.82565300  | H  | 14.45593500 | 9.67541600  | 1.79769700  |
| C  | 12.51373500 | 10.34879900 | -0.71782700 | H  | 14.98848300 | 9.82645700  | 0.11032000  |
| C  | 13.91193500 | 11.58748900 | 0.80914900  | C  | 13.13254500 | 11.73564100 | -0.49841000 |
| H  | 14.45593500 | 9.67541600  | 1.79769700  | H  | 12.87312700 | 9.89201600  | -1.65197500 |
| H  | 14.98848300 | 9.82645700  | 0.11032000  | H  | 11.41901800 | 10.35012300 | -0.73518200 |
| C  | 13.13254500 | 11.73564100 | -0.49841000 | H  | 14.81564000 | 12.20243300 | 0.85141300  |
| H  | 12.87312700 | 9.89201600  | -1.65197500 | H  | 13.27500700 | 11.85017500 | 1.66598000  |
| H  | 11.41901800 | 10.35012300 | -0.73518200 | H  | 13.80235600 | 11.98755900 | -1.32924400 |
| H  | 14.81564000 | 12.20243300 | 0.85141300  | H  | 12.36639300 | 12.51483100 | -0.45093000 |
| H  | 13.27500700 | 11.85017500 | 1.66598000  |    |             |             |             |
| H  | 13.80235600 | 11.98755900 | -1.32924400 |    |             |             |             |
| H  | 12.36639300 | 12.51483100 | -0.45093000 |    |             |             |             |

#### TS10-4- NMe<sub>2</sub>-Ph

|    |             |             |             |   |             |             |             |
|----|-------------|-------------|-------------|---|-------------|-------------|-------------|
| Ni | 8.18886700  | 11.82926500 | 0.14047300  | C | 14.19729100 | 10.10364500 | 0.82565300  |
| C  | 6.50577500  | 11.50591700 | -0.85547800 | C | 12.51373500 | 10.34879900 | -0.71782700 |
| C  | 6.25113800  | 11.48048900 | 0.52945800  | C | 13.91193500 | 11.58748900 | 0.80914900  |
| C  | 6.69820600  | 12.53494100 | 1.33768300  | H | 14.45593500 | 9.67541600  | 1.79769700  |
| C  | 6.53770700  | 12.55619500 | 2.82361300  | H | 14.98848300 | 9.82645700  | 0.11032000  |
| C  | 7.66822700  | 13.29317600 | 3.56574500  | C | 13.13254500 | 11.73564100 | -0.49841000 |
| C  | 8.93540000  | 12.50489300 | 3.66895700  | H | 12.87312700 | 9.89201600  | -1.65197500 |
| C  | 9.75296900  | 12.25271400 | 2.63206200  | H | 11.41901800 | 10.35012300 | -0.73518200 |
| C  | 9.59541900  | 12.66272600 | 1.23068200  | H | 14.81564000 | 12.20243300 | 0.85141300  |
| C  | 9.22913700  | 11.58610100 | -1.45056500 | H | 13.27500700 | 11.85017500 | 1.66598000  |
| C  | 10.12681700 | 12.56642400 | -1.89733100 | H | 13.80235600 | 11.98755900 | -1.32924400 |
| C  | 10.94627300 | 12.41642200 | -3.01972000 | H | 12.36639300 | 12.51483100 | -0.45093000 |



|   |             |            |             |   |             |             |             |
|---|-------------|------------|-------------|---|-------------|-------------|-------------|
| O | 12.25947200 | 7.53818900 | 2.91795900  | H | 10.38972700 | 7.06749000  | -4.14710600 |
| C | 12.60751100 | 6.38806500 | 3.69780100  | H | 11.33468200 | 5.67696200  | -3.57781600 |
| C | 12.66936500 | 8.65309700 | 3.70990100  | H | 12.31263900 | 8.57987500  | -3.80447600 |
| C | 13.95487500 | 6.71783500 | 4.33621100  | H | 13.08058600 | 7.13610200  | -4.50108200 |
| H | 11.81902800 | 6.24611200 | 4.45696500  | H | 10.22577500 | 13.49949600 | -1.33740000 |
| H | 12.62390300 | 5.52386000 | 3.02834200  | H | 9.03137900  | 9.46026300  | -0.12457300 |
| C | 14.03276700 | 8.25552500 | 4.26082400  | C | 8.50499100  | 9.24523700  | 2.03760100  |
| H | 12.65472100 | 9.54546700 | 3.07255300  | H | 7.77574100  | 8.48612300  | 1.71702200  |
| H | 11.93328600 | 8.79813600 | 4.51844300  | H | 7.92516200  | 10.14227500 | 2.31157900  |
| H | 14.76326600 | 6.27138100 | 3.74863400  | C | 9.24616900  | 8.79787500  | 3.28853300  |
| H | 14.01270900 | 6.34211600 | 5.36251300  | H | 9.96941500  | 9.58316100  | 3.55930600  |
| H | 14.83000100 | 8.54671500 | 3.56759200  | H | 9.83194500  | 7.89371700  | 3.07827000  |
| H | 14.23184200 | 8.72765200 | 5.22764300  | C | 8.30712600  | 8.55688000  | 4.45653600  |
| O | 11.44262200 | 5.49833700 | 0.90010100  | H | 7.69487200  | 9.45647200  | 4.63242300  |
| C | 10.11762500 | 5.20636900 | 1.36636800  | H | 7.59707300  | 7.75251200  | 4.20166900  |
| C | 12.01222900 | 4.34397700 | 0.25205100  | C | 9.04515500  | 8.19675400  | 5.73507500  |
| C | 9.67180100  | 4.02222500 | 0.53443300  | H | 9.73050300  | 7.35305700  | 5.53755800  |
| H | 10.16030700 | 4.94669200 | 2.43791300  | H | 9.68849600  | 9.04345600  | 6.02990500  |
| H | 9.52586500  | 6.11732400 | 1.24180700  | C | 8.12234900  | 7.83954300  | 6.88823400  |
| C | 10.97493600 | 3.24120600 | 0.40094200  | H | 7.42301900  | 8.67233600  | 7.06811500  |
| H | 12.20349800 | 4.61469100 | -0.79687700 | H | 7.49316900  | 6.98124500  | 6.60006100  |
| H | 12.97749500 | 4.11568000 | 0.71745700  | C | 8.86044800  | 7.51288400  | 8.17692100  |
| H | 9.31886800  | 4.35913000 | -0.44996300 | H | 9.56817600  | 6.69060700  | 7.98967200  |
| H | 8.86544800  | 3.45261500 | 1.00567100  | H | 9.47678700  | 8.37677700  | 8.46861700  |
| H | 10.98575800 | 2.54240600 | -0.44033100 | C | 7.92182800  | 7.13961700  | 9.31120500  |
| H | 11.16102900 | 2.66533400 | 1.31668300  | H | 8.46321000  | 6.90706200  | 10.23425900 |
| O | 12.11720300 | 7.24480600 | -1.35917100 | H | 7.22557200  | 7.95848500  | 9.53118600  |
| C | 10.84438300 | 7.08908900 | -2.01218100 | H | 7.31817900  | 6.26149000  | 9.04928800  |
| C | 13.18328000 | 7.25507700 | -2.32688500 | H | 8.44366600  | 9.66606900  | -2.08443700 |
| C | 11.18028000 | 6.75816600 | -3.45460700 | N | 11.83744100 | 10.98418100 | -4.82833500 |
| H | 10.28890300 | 6.30310000 | -1.48536300 | C | 11.28288500 | 10.44000200 | -6.05323200 |
| H | 10.28956700 | 8.03234900 | -1.92197300 | H | 10.66031400 | 11.17014100 | -6.60110100 |
| C | 12.49487900 | 7.50486000 | -3.65351300 | H | 12.10109600 | 10.12473400 | -6.71110700 |
| H | 13.90469000 | 8.02458500 | -2.03012300 | H | 10.66962800 | 9.55696300  | -5.85301100 |
| H | 13.69662500 | 6.28291700 | -2.29714000 | C | 12.83146400 | 11.99923200 | -5.08469800 |

|   |             |             |             |
|---|-------------|-------------|-------------|
| H | 13.38248500 | 12.23285400 | -4.16676000 |
| H | 13.55005200 | 11.61897100 | -5.81903600 |
| H | 12.40870900 | 12.94244600 | -5.47985600 |

**Figure S19**

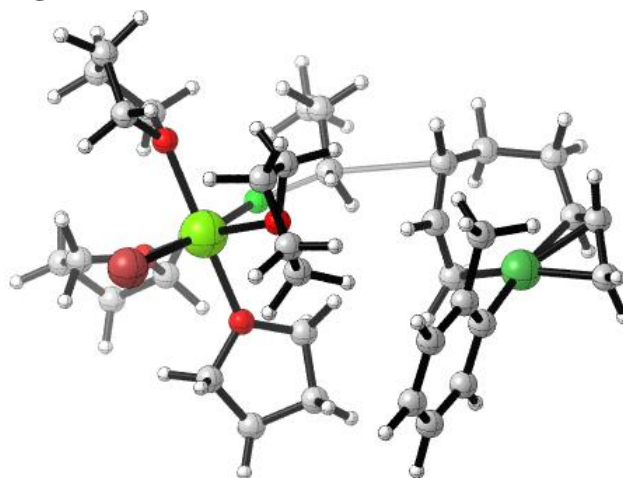

**TS3-2-methyl-up**

|    |            |             |             |
|----|------------|-------------|-------------|
| Ni | 4.60904600 | 0.48339900  | 0.42282600  |
| C  | 6.50761700 | 0.29082500  | -0.01000000 |
| C  | 6.07187800 | 1.60667900  | -0.27976100 |
| C  | 5.37852100 | 2.35693100  | 0.68853800  |
| C  | 4.67967500 | 3.62906100  | 0.29184700  |
| C  | 3.13211400 | 3.64240100  | 0.43177800  |
| C  | 2.46885100 | 2.53120300  | -0.31225700 |
| C  | 2.55730300 | 1.23267600  | 0.17115600  |
| C  | 2.97679800 | 0.82864800  | 1.46826700  |
| C  | 4.15229900 | -1.34355300 | 0.10813300  |
| C  | 3.90341400 | -2.25738100 | 1.14452200  |
| C  | 3.46660000 | -3.56470200 | 0.92650500  |
| C  | 3.25551200 | -4.01391300 | -0.37175800 |
| C  | 3.49902100 | -3.13967400 | -1.42711600 |
| C  | 3.92944800 | -1.82783900 | -1.20361900 |
| H  | 6.94163400 | 0.04866600  | 0.96396500  |
| H  | 6.89298000 | -0.31584300 | -0.82705500 |
| H  | 5.96140800 | 1.91576300  | -1.32541700 |
| H  | 5.69793600 | 2.28309100  | 1.73374100  |
| H  | 4.90301400 | 3.83493200  | -0.76704700 |
| H  | 5.08515600 | 4.47983700  | 0.86030300  |
| H  | 2.87116000 | 3.59217400  | 1.50312300  |
| H  | 2.77377800 | 4.62290600  | 0.08059400  |

|    |             |             |             |   |             |             |             |
|----|-------------|-------------|-------------|---|-------------|-------------|-------------|
| H  | 2.33064500  | 2.66456400  | -1.39090800 | H | -4.14520500 | 2.71280700  | -3.52834100 |
| H  | 2.14880900  | 0.44191000  | -0.47097500 | H | -6.12762600 | 2.00841700  | -1.30060500 |
| H  | 2.60143300  | -0.11287400 | 1.86832700  | H | -5.55302900 | 3.63351400  | -1.71398900 |
| H  | 3.12601800  | 1.60451200  | 2.22214500  | O | -0.48092200 | -0.43790100 | -1.18986500 |
| H  | 3.30011900  | -4.23283800 | 1.77235200  | C | 0.26663300  | -1.68283900 | -1.18789500 |
| H  | 3.35638900  | -3.48482400 | -2.45390100 | C | -0.36643200 | 0.11042400  | -2.50781200 |
| C  | -0.07165100 | 2.25565500  | 0.23552200  | C | 0.29060600  | -2.16606000 | -2.64000800 |
| H  | 0.20499700  | 1.48352100  | -0.46184300 | H | 1.28161900  | -1.48330800 | -0.80911300 |
| H  | 0.39843400  | 2.19101600  | 1.21372100  | H | -0.24556900 | -2.36282500 | -0.50125300 |
| F  | -1.56678800 | 1.51844400  | 0.68600100  | C | -0.48322400 | -1.09375100 | -3.41791100 |
| Mg | -2.27788200 | -0.18201300 | -0.05612800 | H | -1.15156300 | 0.87122600  | -2.61379500 |
| Br | -3.35726300 | -2.17913500 | -1.08583700 | H | 0.61873000  | 0.60064800  | -2.60652200 |
| O  | -3.83047600 | 0.06339200  | 1.40885200  | H | -0.17506600 | -3.15024900 | -2.74351500 |
| C  | -5.19247300 | -0.38393800 | 1.28646500  | H | 1.32800300  | -2.24309200 | -2.98562800 |
| C  | -3.60081200 | 0.63531700  | 2.70782900  | H | -1.53729600 | -1.38199300 | -3.51547100 |
| C  | -5.92113500 | 0.32130900  | 2.41132400  | H | -0.07278900 | -0.90772000 | -4.41491300 |
| H  | -5.54056800 | -0.13156900 | 0.27876600  | O | -1.28643000 | -1.23188800 | 1.48949800  |
| H  | -5.22164700 | -1.47773000 | 1.38901600  | C | -0.02602600 | -0.84034400 | 2.06747700  |
| C  | -4.85569700 | 0.32529000  | 3.50218600  | C | -1.74852000 | -2.46494600 | 2.07588400  |
| H  | -2.68409900 | 0.19388300  | 3.11665900  | C | 0.47492200  | -2.08254900 | 2.77086900  |
| H  | -3.43660700 | 1.71609200  | 2.58650000  | H | 0.62987400  | -0.48134200 | 1.26940500  |
| H  | -6.84604900 | -0.18588300 | 2.69938300  | H | -0.19930000 | -0.00788800 | 2.76882300  |
| H  | -6.17125000 | 1.35128300  | 2.11914200  | C | -0.83196700 | -2.69752300 | 3.26176800  |
| H  | -4.78272300 | -0.67068800 | 3.95925200  | H | -2.81107400 | -2.33918300 | 2.31967900  |
| H  | -5.03859200 | 1.05161300  | 4.29893800  | H | -1.66822200 | -3.26278200 | 1.32475800  |
| O  | -3.38946100 | 1.18069500  | -1.37205800 | H | 1.18565100  | -1.85109800 | 3.56971100  |
| C  | -4.07659700 | 0.77466600  | -2.57743500 | H | 0.98317400  | -2.74311000 | 2.05342100  |
| C  | -4.04426600 | 2.33899700  | -0.81214200 | H | -1.19693700 | -2.15547100 | 4.14555900  |
| C  | -4.82176700 | 2.01237600  | -3.02164900 | H | -0.75135600 | -3.75634200 | 3.52300600  |
| H  | -3.32292300 | 0.40140900  | -3.27895000 | C | 4.13494700  | -0.92252300 | -2.38783400 |
| H  | -4.74950100 | -0.06090000 | -2.34157200 | H | 3.45912600  | -0.05277400 | -2.35981800 |
| C  | -5.26779000 | 2.57819800  | -1.67891900 | H | 5.15187600  | -0.51044900 | -2.41003500 |
| H  | -4.27911900 | 2.13648700  | 0.23946800  | H | 3.96611300  | -1.44541900 | -3.33845800 |
| H  | -3.34321900 | 3.18327400  | -0.84901900 | H | 2.92432200  | -5.03271100 | -0.56469800 |
| H  | -5.64954300 | 1.78306300  | -3.69834400 | H | 4.06130800  | -1.93558500 | 2.17738600  |

|   |             |            |             |
|---|-------------|------------|-------------|
| C | -0.55405100 | 3.57207700 | -0.26995500 |
| H | 0.28248800  | 4.06800900 | -0.77422000 |
| H | -1.30793900 | 3.37427600 | -1.04672900 |
| C | -1.10723200 | 4.45988400 | 0.83086600  |
| H | -0.32621900 | 4.68076200 | 1.56897100  |
| H | -1.47171800 | 5.41320000 | 0.43498300  |
| H | -1.93364100 | 3.96551500 | 1.35515800  |

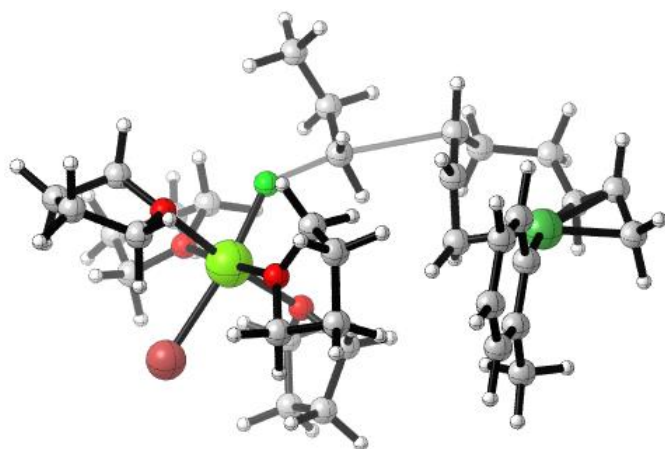

|    |             |             |             |
|----|-------------|-------------|-------------|
| C  | 4.76101700  | -1.62874600 | -1.49826500 |
| H  | 6.54192300  | 0.64561900  | 1.57379000  |
| H  | 7.20460700  | 0.35898400  | -0.10729200 |
| H  | 6.18071900  | 2.44523000  | -0.93686500 |
| H  | 4.69629500  | 2.55355800  | 1.77562200  |
| H  | 4.66824300  | 4.14844700  | -0.83138800 |
| H  | 4.17928000  | 4.71589300  | 0.76311100  |
| H  | 2.06399300  | 3.41607800  | 0.59259100  |
| H  | 2.25466300  | 4.60349100  | -0.69360000 |
| H  | 2.67464700  | 2.84990700  | -2.38113100 |
| H  | 2.69844500  | 0.51401300  | -1.81763300 |
| H  | 2.22842300  | -0.35175700 | 0.39914100  |
| H  | 2.24737700  | 1.33031500  | 1.12838500  |
| H  | 4.12922400  | -4.23204300 | 1.26059600  |
| H  | 4.85661900  | -3.29666500 | -2.86683600 |
| C  | -0.05705700 | 2.05303300  | -1.29333500 |
| H  | 0.31699500  | 1.36698400  | -2.04109500 |
| H  | 0.29028900  | 1.89061000  | -0.27616000 |
| F  | -1.57625200 | 1.23610000  | -1.11079200 |
| Mg | -2.33969600 | -0.17300800 | 0.02573100  |
| Br | -3.68781800 | -1.77595900 | 1.40575100  |
| O  | -3.86805500 | 1.36610600  | 0.40227500  |
| C  | -5.20567600 | 1.19052300  | 0.92296200  |
| C  | -3.61623700 | 2.76163400  | 0.15454300  |
| C  | -5.89747700 | 2.51246900  | 0.66378200  |
| H  | -5.66110300 | 0.32871400  | 0.42556300  |
| H  | -5.13842500 | 0.95660400  | 1.99498300  |
| C  | -4.74962400 | 3.49753300  | 0.83924900  |
| H  | -2.61964400 | 3.00291600  | 0.54253000  |
| H  | -3.61244700 | 2.92879200  | -0.93337000 |
| H  | -6.73778100 | 2.68400300  | 1.34207600  |
| H  | -6.27672700 | 2.55170900  | -0.36685300 |
| H  | -4.52789000 | 3.63528000  | 1.90637500  |
| H  | -4.93572100 | 4.48225800  | 0.40137900  |
| O  | -3.24989700 | -0.88830400 | -1.80571600 |

**TS3-2-methyl-down**

|    |            |             |             |
|----|------------|-------------|-------------|
| Ni | 4.53592500 | 0.70733200  | 0.14947600  |
| C  | 6.45133400 | 0.85131500  | 0.50345400  |
| C  | 5.93120000 | 2.09175400  | 0.06924100  |
| C  | 4.80748600 | 2.66510100  | 0.69019800  |
| C  | 4.12548200 | 3.85416900  | 0.08033400  |
| C  | 2.64328300 | 3.64261400  | -0.31976700 |
| C  | 2.48019800 | 2.56752400  | -1.34241200 |
| C  | 2.64201800 | 1.23657900  | -0.99386600 |
| C  | 2.58137800 | 0.67805400  | 0.31464000  |
| C  | 4.58711800 | -1.16019200 | -0.18641800 |
| C  | 4.35653900 | -2.14261400 | 0.80202600  |
| C  | 4.30427100 | -3.49804700 | 0.47080900  |
| C  | 4.47180000 | -3.92940000 | -0.84319000 |
| C  | 4.70635300 | -2.98316000 | -1.83376600 |

|   |             |             |             |
|---|-------------|-------------|-------------|
| C | -3.37083100 | -2.30379000 | -2.07491500 |
| C | -4.36327100 | -0.19272600 | -2.37790800 |
| C | -4.64170000 | -2.46096400 | -2.89632400 |
| H | -2.46668100 | -2.63847100 | -2.59897800 |
| H | -3.44384500 | -2.81179600 | -1.10458400 |
| C | -5.45213000 | -1.23924300 | -2.47878400 |
| H | -4.60034100 | 0.65668100  | -1.72714700 |
| H | -4.07877900 | 0.19543200  | -3.36818500 |
| H | -5.14713300 | -3.40863300 | -2.69070400 |
| H | -4.42308300 | -2.41978600 | -3.97101900 |
| H | -5.90364000 | -1.40504600 | -1.49156300 |
| H | -6.24095700 | -0.97112800 | -3.18763700 |
| O | -0.81677800 | -1.60656400 | -0.43491100 |
| C | -0.59253100 | -2.89886500 | 0.17315800  |
| C | 0.16220500  | -1.38981500 | -1.48425200 |
| C | 0.84472200  | -3.22600200 | -0.15705800 |
| H | -0.81393000 | -2.81654500 | 1.24142900  |
| H | -1.29859400 | -3.62176700 | -0.26371400 |
| C | 0.97828900  | -2.66688300 | -1.56814300 |
| H | -0.37276100 | -1.13472400 | -2.40796300 |
| H | 0.78616600  | -0.54153800 | -1.18085200 |
| H | 1.06844400  | -4.29471200 | -0.09184100 |
| H | 1.53665500  | -2.70368200 | 0.51965600  |
| H | 0.54175900  | -3.36256700 | -2.29795100 |
| H | 2.02217300  | -2.47728700 | -1.84650200 |
| O | -1.23513900 | 0.61340100  | 1.72182600  |
| C | -0.14383400 | -0.12296400 | 2.30327300  |
| C | -1.92865600 | 1.17708900  | 2.84694300  |
| C | -0.75815800 | -0.83664800 | 3.49538700  |
| H | 0.27345800  | -0.76460100 | 1.52327500  |
| H | 0.63341300  | 0.59376200  | 2.61047600  |
| C | -1.86792500 | 0.12549100  | 3.95576200  |
| H | -1.40839400 | 2.10326000  | 3.13540700  |
| H | -2.94223900 | 1.42108400  | 2.51745300  |
| H | -0.01408600 | -1.04252700 | 4.27047000  |

|   |             |             |             |
|---|-------------|-------------|-------------|
| H | -1.20733700 | -1.78652500 | 3.18281400  |
| H | -1.64563200 | 0.58954600  | 4.92189900  |
| H | -2.82221400 | -0.40404700 | 4.03678500  |
| H | 4.43528700  | -4.99066700 | -1.08343300 |
| C | 4.14740300  | -1.72746800 | 2.23136300  |
| H | 4.95959800  | -1.07593600 | 2.57857500  |
| H | 3.22025300  | -1.14415100 | 2.35017100  |
| H | 4.09129200  | -2.58922400 | 2.90832500  |
| H | 4.96319100  | -0.90916800 | -2.29704000 |
| C | -0.52545600 | 3.39620900  | -1.74187200 |
| H | -1.31041900 | 3.73471900  | -1.05378000 |
| H | 0.30009800  | 4.10662900  | -1.62311300 |
| C | -1.02497800 | 3.38610000  | -3.17541200 |
| H | -0.21520300 | 3.10086600  | -3.85837500 |
| H | -1.83888900 | 2.66218200  | -3.29723100 |
| H | -1.38964000 | 4.37081000  | -3.48368000 |

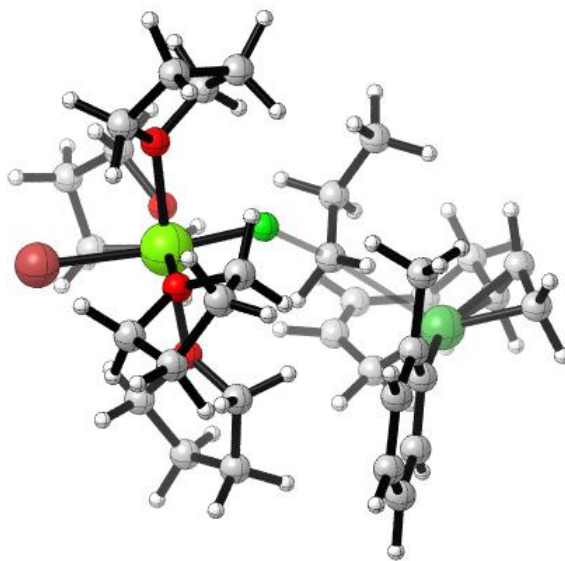

**TS10-2-methyl-up**

|    |            |             |            |
|----|------------|-------------|------------|
| Ni | 3.71795200 | 0.16016100  | 0.29198600 |
| C  | 4.92605800 | 1.05118900  | 1.58810800 |
| C  | 4.88227100 | -0.33392100 | 1.83963300 |

|    |             |             |             |   |             |             |             |
|----|-------------|-------------|-------------|---|-------------|-------------|-------------|
| C  | 5.11947600  | -1.22574400 | 0.78477600  | H | -1.69596700 | -1.33771100 | -3.08711000 |
| C  | 5.01571100  | -2.71121900 | 0.91768300  | H | -2.09714900 | 0.33293900  | -3.52862900 |
| C  | 4.78526400  | -3.42626800 | -0.42388500 | C | 0.49465700  | 1.18971800  | -3.37235700 |
| C  | 3.37781400  | -3.35749500 | -0.93060600 | H | -0.74260900 | 2.16835200  | -1.84252500 |
| C  | 2.74626700  | -2.23673100 | -1.32091900 | H | 0.63648300  | 1.27893600  | -1.16978800 |
| C  | 3.23136400  | -0.85172900 | -1.33762100 | H | -0.14143200 | -0.16769600 | -4.99109200 |
| C  | 2.95701200  | 1.86493000  | -0.21544200 | H | 0.69136900  | -0.95927500 | -3.63446200 |
| C  | 3.28335000  | 2.31628100  | -1.50835400 | H | 0.13409400  | 2.01569200  | -3.99653600 |
| C  | 2.82588000  | 3.51605800  | -2.04965800 | H | 1.58660600  | 1.25749300  | -3.33670600 |
| C  | 1.98875900  | 4.33268100  | -1.29994600 | O | -1.67839200 | -2.40976700 | 0.07892700  |
| C  | 1.67091900  | 3.94328700  | -0.00403300 | C | -2.64567400 | -3.33589300 | 0.60579000  |
| C  | 2.15060200  | 2.74822100  | 0.54953700  | C | -1.01058400 | -3.09348100 | -0.98587800 |
| H  | 5.69275400  | 1.45325800  | 0.92094900  | C | -3.05351400 | -4.24697700 | -0.55635700 |
| H  | 4.61243500  | 1.74617100  | 2.36310200  | H | -2.16179200 | -3.89889900 | 1.41977600  |
| H  | 4.38847100  | -0.70945700 | 2.74132000  | H | -3.47250100 | -2.74765000 | 1.01414200  |
| H  | 5.86101800  | -0.90977000 | 0.03682700  | C | -2.11925200 | -3.83775800 | -1.70417000 |
| H  | 4.21810500  | -2.98082000 | 1.63002800  | H | -0.48304500 | -2.34059400 | -1.58307600 |
| H  | 5.95192600  | -3.09882400 | 1.35094600  | H | -0.26085300 | -3.78283300 | -0.55900200 |
| H  | 5.48273900  | -2.98570800 | -1.15672800 | H | -4.10043200 | -4.08935500 | -0.82993300 |
| H  | 5.08406500  | -4.47720500 | -0.32302600 | H | -2.92470400 | -5.30053700 | -0.28647100 |
| H  | 2.82615200  | -4.29821900 | -0.97638300 | H | -2.64954100 | -3.15589500 | -2.37996700 |
| H  | 1.70098500  | -2.37242400 | -1.62645100 | H | -1.74597900 | -4.68768400 | -2.28295200 |
| H  | 2.58120300  | -0.23911300 | -1.97724300 | O | -3.13101600 | -0.49855500 | 1.89224200  |
| H  | 4.25236600  | -0.80788300 | -1.76018300 | C | -2.49528300 | -0.97458800 | 3.07839100  |
| H  | 3.11820400  | 3.80529300  | -3.05884600 | C | -4.21279900 | 0.35607600  | 2.28952200  |
| H  | 1.04980200  | 4.59729700  | 0.61457700  | C | -2.48684800 | 0.23720100  | 3.98224500  |
| C  | 1.23344600  | -0.56534800 | 0.72956100  | H | -3.09414500 | -1.79661000 | 3.50696700  |
| H  | 1.00832400  | -0.62870000 | -0.32689200 | H | -1.50617300 | -1.34694700 | 2.79827700  |
| F  | -0.56317600 | 0.02242200  | 1.10569800  | C | -3.86854100 | 0.84213000  | 3.70698200  |
| Mg | -2.09775100 | -0.26996400 | -0.01370900 | H | -4.27892400 | 1.15963500  | 1.54797800  |
| Br | -4.22755900 | -0.71310900 | -1.26443500 | H | -5.14886900 | -0.21642700 | 2.24994500  |
| O  | -0.93999400 | 0.09739000  | -1.81598500 | H | -1.67969400 | 0.90735400  | 3.65690800  |
| C  | -1.29849000 | -0.32061000 | -3.14278900 | H | -2.32557600 | -0.00646600 | 5.03649900  |
| C  | -0.11327900 | 1.27685200  | -1.96855500 | H | -3.87014600 | 1.93476300  | 3.78154000  |
| C  | -0.00576400 | -0.15326900 | -3.90584700 | H | -4.60179900 | 0.46734200  | 4.42996500  |

|   |             |             |             |
|---|-------------|-------------|-------------|
| O | -2.44014600 | 1.84496300  | 0.03670500  |
| C | -1.76698600 | 2.72201900  | 0.95876800  |
| C | -3.23102300 | 2.60973300  | -0.89478300 |
| C | -2.46809600 | 4.05488500  | 0.80655900  |
| H | -1.83952900 | 2.28361700  | 1.96057600  |
| H | -0.70605800 | 2.78253300  | 0.67858300  |
| C | -2.80130900 | 4.04879100  | -0.68023700 |
| H | -3.04423400 | 2.22222800  | -1.90257600 |
| H | -4.29383500 | 2.44910100  | -0.66586800 |
| H | -1.83798600 | 4.89515200  | 1.11371600  |
| H | -3.38996200 | 4.07605100  | 1.40544600  |
| H | -1.89759300 | 4.27575700  | -1.26371000 |
| H | -3.57838400 | 4.76391900  | -0.96450100 |
| H | 1.61327600  | 5.27188200  | -1.70229200 |
| C | 1.75483900  | 2.46250600  | 1.97953200  |
| H | 0.82916000  | 1.86926300  | 2.05038400  |
| H | 2.53242800  | 1.90330800  | 2.51236800  |
| H | 1.57528400  | 3.39376600  | 2.53087800  |
| H | 3.92174700  | 1.69263500  | -2.13931500 |
| H | 1.59240800  | 0.37883200  | 1.10049100  |
| C | 1.27740400  | -1.77331800 | 1.57068000  |
| H | 2.09597500  | -2.41298800 | 1.19422600  |
| H | 0.35852300  | -2.34532700 | 1.37260800  |
| C | 1.42392600  | -1.45452000 | 3.04802200  |
| H | 2.36725700  | -0.93078100 | 3.24423000  |
| H | 0.61272000  | -0.79305900 | 3.37785400  |
| H | 1.40744500  | -2.36002100 | 3.66275500  |

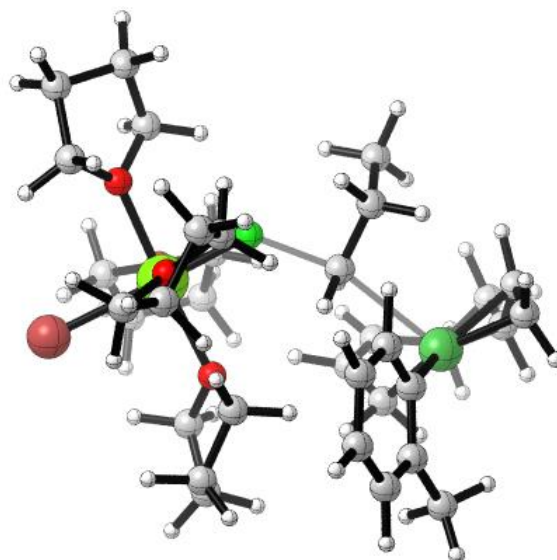

### TS10-2-methyl-down

|    |            |             |             |
|----|------------|-------------|-------------|
| Ni | 3.57724100 | -0.10627600 | 0.50034100  |
| C  | 4.80171900 | 0.47445500  | 1.94659000  |
| C  | 4.55475600 | -0.90919600 | 2.05959500  |
| C  | 4.71040000 | -1.74409800 | 0.94568400  |
| C  | 4.37412600 | -3.20128100 | 0.96778000  |
| C  | 3.91074200 | -3.76090200 | -0.38974500 |
| C  | 2.50415200 | -3.39065900 | -0.73492500 |
| C  | 2.11527400 | -2.15046800 | -1.08076000 |
| C  | 2.93999600 | -0.94037500 | -1.17885000 |
| C  | 3.13152200 | 1.72524800  | 0.10720300  |
| C  | 3.61385500 | 2.36138000  | -1.06379900 |
| C  | 3.21779600 | 3.66156100  | -1.39250300 |
| C  | 2.37011000 | 4.40118300  | -0.57365000 |
| C  | 1.95543300 | 3.83681000  | 0.62528200  |
| C  | 2.34196600 | 2.53517900  | 0.94266600  |
| H  | 5.66952800 | 0.82436800  | 1.38139000  |
| H  | 4.51530900 | 1.13568000  | 2.76270600  |
| H  | 3.95479600 | -1.28373400 | 2.89581000  |
| H  | 5.51077600 | -1.48373800 | 0.23656600  |
| H  | 3.59877000 | -3.39826500 | 1.72595900  |
| H  | 5.26293500 | -3.76925200 | 1.28532500  |
| H  | 4.60892100 | -3.39524900 | -1.16094400 |

|    |             |             |             |   |             |             |             |
|----|-------------|-------------|-------------|---|-------------|-------------|-------------|
| H  | 4.01721500  | -4.85289600 | -0.37791600 | H | -2.87200000 | -4.72685700 | -2.52571900 |
| H  | 1.75119800  | -4.17807000 | -0.65749700 | H | -0.16345700 | -3.88172500 | -1.92625900 |
| H  | 1.04184800  | -2.00554300 | -1.25043800 | H | -1.00440700 | -5.19262400 | -1.09874700 |
| H  | 2.42937600  | -0.19105200 | -1.79674500 | O | -3.59047400 | -0.51302900 | 1.35001800  |
| H  | 3.90422300  | -1.17815600 | -1.65837400 | C | -3.44283200 | -1.52619000 | 2.35459800  |
| H  | 3.59708500  | 4.10757800  | -2.31372600 | C | -4.64347000 | 0.39746200  | 1.69749300  |
| H  | 1.34774500  | 4.41211500  | 1.32613200  | C | -4.27249100 | -1.03913600 | 3.52718600  |
| C  | 1.13411700  | -0.35985400 | 1.27107200  | H | -3.82526700 | -2.47674400 | 1.95101800  |
| H  | 1.06077200  | 0.56008000  | 0.70968300  | H | -2.37368100 | -1.63428500 | 2.56496600  |
| F  | -0.78340400 | -0.54894800 | 1.23701700  | C | -5.39646500 | -0.28995700 | 2.81902400  |
| Mg | -2.08960800 | -0.15416800 | -0.14662500 | H | -4.18760300 | 1.34311600  | 2.03329400  |
| Br | -3.82896400 | 0.44284700  | -1.87705100 | H | -5.22668300 | 0.59618700  | 0.79166500  |
| O  | -0.50722100 | 0.11614600  | -1.57515100 | H | -3.68557100 | -0.34608100 | 4.14545200  |
| C  | -0.57580700 | -0.48684400 | -2.88943200 | H | -4.61879200 | -1.85472800 | 4.16864400  |
| C  | 0.06237000  | 1.44404000  | -1.68509200 | H | -5.92926500 | 0.41568000  | 3.46294700  |
| C  | 0.18854000  | 0.44968900  | -3.80697100 | H | -6.12836800 | -0.99828300 | 2.41016200  |
| H  | -0.13326700 | -1.48957800 | -2.83101800 | O | -2.12046700 | 1.88956800  | 0.60989100  |
| H  | -1.63725400 | -0.56229700 | -3.16524900 | C | -1.42504900 | 2.23056800  | 1.82260200  |
| C  | -0.04583300 | 1.80438000  | -3.14915000 | C | -2.70880300 | 3.07000300  | 0.02418000  |
| H  | -0.49380000 | 2.10328700  | -1.01162300 | C | -1.87896200 | 3.63739700  | 2.15476000  |
| H  | 1.10924500  | 1.41338300  | -1.35410700 | H | -1.66992800 | 1.47178500  | 2.57586100  |
| H  | -0.17003700 | 0.39589400  | -4.83904000 | H | -0.34149600 | 2.20355000  | 1.62503700  |
| H  | 1.25946500  | 0.20428300  | -3.79890800 | C | -2.06360300 | 4.22610300  | 0.76141400  |
| H  | -1.05301000 | 2.17427400  | -3.38355100 | H | -2.52020700 | 3.05268900  | -1.05392100 |
| H  | 0.68947800  | 2.56357200  | -3.43398300 | H | -3.79689800 | 3.02594300  | 0.17508900  |
| O  | -2.19812000 | -2.26726300 | -0.49188200 | H | -1.15137000 | 4.17567800  | 2.76956300  |
| C  | -3.17476200 | -2.96187300 | -1.27661200 | H | -2.83655700 | 3.62293600  | 2.69352600  |
| C  | -1.22741100 | -3.25289500 | -0.13257700 | H | -1.08399100 | 4.45747600  | 0.31819600  |
| C  | -2.33844500 | -3.82716200 | -2.20529400 | H | -2.67484400 | 5.13271100  | 0.73886900  |
| H  | -3.79680200 | -3.57401100 | -0.60148200 | H | 2.07863700  | 5.41276200  | -0.84936800 |
| H  | -3.79578200 | -2.20565500 | -1.76609300 | H | 1.25359800  | -1.28782900 | 0.72744200  |
| C  | -1.07641900 | -4.13546300 | -1.37425100 | H | 2.01560200  | 2.14748000  | 1.91217200  |
| H  | -0.31789200 | -2.73336700 | 0.17967600  | C | 4.57238100  | 1.66716100  | -1.99394900 |
| H  | -1.61315100 | -3.82755400 | 0.72620300  | H | 5.30972600  | 1.07061400  | -1.44166300 |
| H  | -2.08009900 | -3.25726100 | -3.10518700 | H | 4.05822400  | 0.97504600  | -2.67379600 |



|   |            |             |             |
|---|------------|-------------|-------------|
| H | 5.12100800 | 2.38788500  | -2.61138800 |
| C | 1.25734000 | -0.36820700 | 2.74916100  |
| H | 2.23044300 | 0.05775800  | 3.03099300  |
| H | 0.50516200 | 0.31903400  | 3.16086800  |
| C | 1.08955900 | -1.76602600 | 3.31932800  |
| H | 1.86284600 | -2.44060100 | 2.92856600  |
| H | 0.11620000 | -2.17350800 | 3.02350200  |
| H | 1.15368800 | -1.77285100 | 4.41171000  |

**Figure S20**

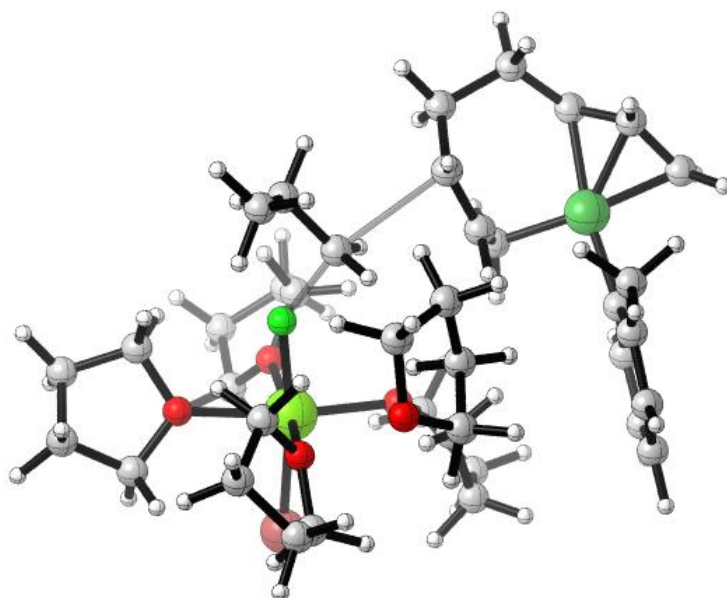

**TS3-2-methyl-up·THF**

|    |             |             |             |
|----|-------------|-------------|-------------|
| Ni | -4.45102500 | -1.10668000 | 0.00306000  |
| C  | -6.39721000 | -1.12533900 | 0.18294800  |
| C  | -6.02368300 | -1.38218600 | -1.15433000 |
| C  | -5.08141900 | -2.37947900 | -1.46664300 |
| C  | -4.49610400 | -2.44961400 | -2.85050500 |
| C  | -2.97325800 | -2.17105200 | -2.97009500 |
| C  | -2.56996600 | -0.85445800 | -2.39345000 |
| C  | -2.54772400 | -0.69108200 | -1.01399300 |
| C  | -2.56826900 | -1.70691200 | -0.02135000 |
| C  | -4.15852800 | 0.10391700  | 1.44401800  |
| C  | -3.75978500 | -0.31534900 | 2.72305400  |
| C  | -3.43623600 | 0.57175400  | 3.75038100  |
| C  | -3.46581300 | 1.94167500  | 3.51412000  |
| C  | -3.85256900 | 2.39511800  | 2.25567000  |
| C  | -4.21893500 | 1.50328200  | 1.24272500  |
| H  | -6.55899300 | -1.95739100 | 0.87381300  |
| H  | -6.99712300 | -0.24508400 | 0.40407200  |
| H  | -6.18920100 | -0.59828000 | -1.90245100 |
| H  | -5.10688600 | -3.31724900 | -0.90083700 |
| H  | -5.00520200 | -1.70701900 | -3.48474300 |

|    |             |             |             |   |             |             |             |
|----|-------------|-------------|-------------|---|-------------|-------------|-------------|
| H  | -4.70383900 | -3.43076600 | -3.30374300 | H | 2.97624700  | 1.51749200  | -1.92233500 |
| H  | -2.42248300 | -2.98897800 | -2.47241400 | H | 1.47539500  | 2.47580600  | -1.75551900 |
| H  | -2.71038100 | -2.23514300 | -4.03778800 | H | 3.52593400  | 4.82509000  | 0.58045800  |
| H  | -2.75224800 | 0.03375900  | -3.00892000 | H | 1.84910200  | 4.59385200  | 0.03714000  |
| H  | -2.35203900 | 0.32029600  | -0.64824800 | H | 4.34682900  | 3.37325800  | -1.22264700 |
| H  | -2.09086900 | -1.48719300 | 0.93412300  | H | 3.04670000  | 4.27523300  | -2.03727200 |
| H  | -2.47970900 | -2.74818500 | -0.34357500 | O | 0.49852300  | -0.49704000 | 1.39837600  |
| H  | -3.15256000 | 0.19139200  | 4.73295100  | C | 0.32698300  | -1.49113100 | 2.43394800  |
| H  | -3.88692300 | 3.46879700  | 2.05505500  | C | -0.20482200 | 0.68356600  | 1.84380600  |
| C  | -0.00456400 | -0.69424900 | -2.09039100 | C | -0.00764100 | -0.73386200 | 3.72343700  |
| H  | -0.36584100 | 0.28353200  | -1.79763700 | H | -0.49217800 | -2.15959300 | 2.13072400  |
| H  | -0.30798200 | -1.51894400 | -1.45376400 | H | 1.25968400  | -2.06179800 | 2.49428900  |
| F  | 1.56375100  | -0.47322600 | -1.42437800 | C | 0.07237200  | 0.74248800  | 3.32766300  |
| Mg | 2.36205300  | -0.31752100 | 0.38777700  | H | 0.18376800  | 1.52603100  | 1.26306800  |
| Br | 3.67535800  | -0.10582400 | 2.49979700  | H | -1.28109600 | 0.56148400  | 1.63981400  |
| O  | 4.18532800  | -0.41878800 | -0.79452600 | H | 0.69019500  | -0.98167700 | 4.52857900  |
| C  | 5.44557400  | 0.18750400  | -0.45138300 | H | -1.02433200 | -0.98002000 | 4.05156800  |
| C  | 4.30239000  | -1.14828500 | -2.02485000 | H | 1.08062900  | 1.13621900  | 3.50892500  |
| C  | 6.26589200  | 0.10657000  | -1.72196800 | H | -0.66880400 | 1.35704900  | 3.84891300  |
| H  | 5.24851900  | 1.20453900  | -0.09509600 | O | 2.43531100  | -2.45877200 | 0.35388000  |
| H  | 5.89787600  | -0.37613400 | 0.37590700  | C | 1.43735800  | -3.31873800 | -0.21966300 |
| C  | 5.79174100  | -1.22325900 | -2.29616800 | C | 3.50001400  | -3.23814900 | 0.93510100  |
| H  | 3.81042300  | -2.12026100 | -1.89690500 | C | 1.73464700  | -4.68672100 | 0.35726900  |
| H  | 3.77579100  | -0.59828900 | -2.81908800 | H | 0.44746400  | -2.92021300 | 0.03676000  |
| H  | 7.34206900  | 0.15129400  | -1.53394000 | H | 1.54620800  | -3.30742400 | -1.31587900 |
| H  | 6.00056900  | 0.92805600  | -2.40243400 | C | 3.25685700  | -4.65142200 | 0.44327600  |
| H  | 6.24281300  | -2.05623400 | -1.73984000 | H | 4.45043700  | -2.78949900 | 0.62233100  |
| H  | 6.02078600  | -1.35759500 | -3.35712300 | H | 3.43620000  | -3.15987100 | 2.02909500  |
| O  | 2.32070400  | 1.81179800  | 0.01427900  | H | 1.34176400  | -5.50055600 | -0.25810300 |
| C  | 2.73302300  | 2.83445000  | 0.95456000  | H | 1.29908200  | -4.77279500 | 1.36201300  |
| C  | 2.47643300  | 2.29640300  | -1.33586000 | H | 3.69601200  | -4.79801900 | -0.55338900 |
| C  | 2.82589900  | 4.10862100  | 0.14117100  | H | 3.67842800  | -5.40502300 | 1.11416100  |
| H  | 1.99758000  | 2.85719800  | 1.76824600  | C | -4.70784800 | 2.06034600  | -0.06859000 |
| H  | 3.69583700  | 2.53625400  | 1.38957000  | H | -4.19200900 | 1.61620000  | -0.93239600 |
| C  | 3.26760100  | 3.58307500  | -1.21885800 | H | -5.77638400 | 1.84988300  | -0.21349100 |

|   |             |             |             |
|---|-------------|-------------|-------------|
| H | -4.57999800 | 3.15115800  | -0.12169400 |
| H | -3.20301600 | 2.64917900  | 4.29902700  |
| H | -3.69495000 | -1.38805200 | 2.92698300  |
| C | 0.35843500  | -0.92957300 | -3.51962100 |
| H | 1.22432600  | -1.60707300 | -3.53497200 |
| H | -0.45845800 | -1.46779500 | -4.01228700 |
| C | 0.67499100  | 0.36235800  | -4.25102200 |
| H | 1.47565400  | 0.90802000  | -3.73619000 |
| H | 0.99185700  | 0.18158400  | -5.28270400 |
| H | -0.21001400 | 1.01194300  | -4.28280100 |
| O | -0.10355500 | 4.63527800  | -1.38990500 |
| C | -0.66907700 | 4.09712100  | -2.58324400 |
| C | -0.82980500 | 4.13071700  | -0.27969300 |
| C | -1.68085700 | 3.02700800  | -2.15557100 |
| H | -1.13510600 | 4.89951500  | -3.17210200 |
| H | 0.14910800  | 3.67438400  | -3.18899500 |
| C | -1.27991100 | 2.75386900  | -0.71053000 |
| H | -0.16873600 | 4.13770400  | 0.59786000  |
| H | -1.70199500 | 4.76962600  | -0.05012400 |
| H | -1.65586900 | 2.13214500  | -2.79031200 |
| H | -2.70505000 | 3.42005800  | -2.18867800 |
| H | -0.42309600 | 2.06196500  | -0.66968800 |
| H | -2.08476100 | 2.34861700  | -0.08684900 |

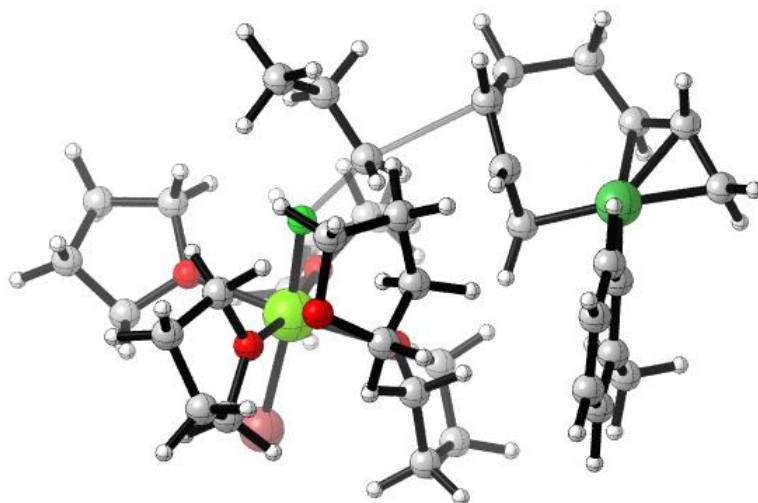

**TS3-2-methyl-down·THF**

|    |             |             |             |
|----|-------------|-------------|-------------|
| Ni | -4.40390100 | -1.05964000 | 0.06943500  |
| C  | -6.27434500 | -1.48952100 | 0.43767500  |
| C  | -5.80277100 | -2.22644700 | -0.67205500 |
| C  | -4.61524500 | -2.97917200 | -0.59575700 |
| C  | -4.00051700 | -3.55575700 | -1.84030600 |
| C  | -2.56582400 | -3.07291400 | -2.18650400 |
| C  | -2.50158100 | -1.59421000 | -2.38668800 |
| C  | -2.64359700 | -0.74292400 | -1.30382700 |
| C  | -2.44586400 | -1.06295900 | 0.06734000  |
| C  | -4.45167000 | 0.71109400  | 0.75840800  |
| C  | -4.79968000 | 1.74139300  | -0.12995900 |
| C  | -4.65994400 | 3.09570200  | 0.18096600  |
| C  | -4.15752700 | 3.46839200  | 1.42170000  |
| C  | -3.83667600 | 2.47173800  | 2.34189000  |
| C  | -3.99290100 | 1.11822200  | 2.03160400  |
| H  | -6.23973200 | -1.92854800 | 1.43907400  |
| H  | -7.08959200 | -0.78513900 | 0.28864600  |
| H  | -6.15637800 | -1.95246600 | -1.67195500 |
| H  | -4.39528900 | -3.51189500 | 0.33713800  |
| H  | -4.63809900 | -3.30267900 | -2.70169600 |
| H  | -3.98754100 | -4.65487300 | -1.78094600 |
| H  | -1.88514900 | -3.39787500 | -1.37814800 |
| H  | -2.23681700 | -3.60854300 | -3.09039100 |

|    |             |             |             |   |             |             |             |
|----|-------------|-------------|-------------|---|-------------|-------------|-------------|
| H  | -2.79074800 | -1.21973100 | -3.37343500 | H | 1.78345100  | 4.54796600  | -0.22810200 |
| H  | -2.78173300 | 0.31774500  | -1.52986200 | H | 4.20871100  | 3.47908400  | -1.74348800 |
| H  | -2.03616400 | -0.26997200 | 0.69174800  | H | 2.72685800  | 4.19414600  | -2.42355500 |
| H  | -2.05244500 | -2.05968700 | 0.30137100  | O | 0.48970500  | -0.06534000 | 1.48424800  |
| H  | -4.93844800 | 3.85654100  | -0.54915600 | C | 0.16864400  | -0.97952200 | 2.54940900  |
| H  | -3.47035500 | 2.75116500  | 3.33213300  | C | -0.02525500 | 1.21561800  | 1.89090400  |
| C  | -0.02051000 | -0.99739300 | -2.03770000 | C | 0.14286600  | -0.15727800 | 3.84132800  |
| H  | -0.43825800 | 0.00072300  | -1.98421200 | H | -0.81297000 | -1.42499200 | 2.32689700  |
| H  | -0.32316600 | -1.66467400 | -1.24363300 | H | 0.93624600  | -1.76123900 | 2.54705100  |
| F  | 1.49634200  | -0.53955700 | -1.30780300 | C | 0.27922200  | 1.29971200  | 3.37353000  |
| Mg | 2.34473700  | -0.22181100 | 0.44018200  | H | 0.46717400  | 1.96781000  | 1.26509500  |
| Br | 3.66599300  | 0.15914100  | 2.53126400  | H | -1.11060500 | 1.24838400  | 1.69925100  |
| O  | 4.14738000  | -0.56683100 | -0.71886300 | H | 0.97164500  | -0.43220700 | 4.50047000  |
| C  | 5.39512800  | 0.11971400  | -0.51255100 | H | -0.79674900 | -0.32387500 | 4.37890300  |
| C  | 4.21802300  | -1.39358900 | -1.88874000 | H | 1.30717400  | 1.64458400  | 3.53119300  |
| C  | 6.14840200  | -0.05254200 | -1.81592200 | H | -0.40787700 | 1.97830700  | 3.88922000  |
| H  | 5.16730600  | 1.15767000  | -0.24587600 | O | 2.35034400  | -2.36817600 | 0.67520300  |
| H  | 5.91906100  | -0.34235000 | 0.33590100  | C | 1.34794000  | -3.28486300 | 0.20907000  |
| C  | 5.69076300  | -1.44221100 | -2.24448100 | C | 3.40182200  | -3.08158300 | 1.36197400  |
| H  | 3.77802500  | -2.37019400 | -1.64971400 | C | 1.64064700  | -4.58373000 | 0.93164200  |
| H  | 3.61794300  | -0.93553500 | -2.68941800 | H | 0.35907800  | -2.86142700 | 0.42857800  |
| H  | 7.23112000  | 0.03907400  | -1.69325500 | H | 1.44450200  | -3.39743500 | -0.88282600 |
| H  | 5.82186000  | 0.69731400  | -2.55022700 | C | 3.16142400  | -4.53957300 | 1.02613700  |
| H  | 6.20370300  | -2.20857300 | -1.64780400 | H | 4.36048800  | -2.67436700 | 1.01968400  |
| H  | 5.86307600  | -1.66081200 | -3.30216000 | H | 3.31431900  | -2.88253300 | 2.43879200  |
| O  | 2.47276500  | 1.85044300  | -0.14435500 | H | 1.25080500  | -5.45766400 | 0.40275000  |
| C  | 2.95029700  | 2.95201400  | 0.65922500  | H | 1.19729500  | -4.56505100 | 1.93632200  |
| C  | 2.45684100  | 2.22414400  | -1.53882500 | H | 3.60970200  | -4.79548600 | 0.05624200  |
| C  | 2.81157100  | 4.16702200  | -0.23203900 | H | 3.57564300  | -5.21516000 | 1.77965300  |
| H  | 2.35725500  | 2.97917700  | 1.58029000  | C | -3.68681700 | 0.08284500  | 3.07615900  |
| H  | 3.99226100  | 2.75441900  | 0.94860200  | H | -4.59944600 | -0.44493500 | 3.38473100  |
| C  | 3.12357000  | 3.58555100  | -1.60546000 | H | -3.01030600 | -0.69051400 | 2.68358500  |
| H  | 2.97619100  | 1.44425400  | -2.10856000 | H | -3.23721000 | 0.52151600  | 3.97781500  |
| H  | 1.40985500  | 2.27163200  | -1.86747700 | H | -4.03546700 | 4.51854300  | 1.68206000  |
| H  | 3.48542800  | 4.97628400  | 0.06371600  | H | -5.18519600 | 1.48007000  | -1.12059900 |

|   |             |             |             |
|---|-------------|-------------|-------------|
| C | 0.48966700  | -1.51636600 | -3.34038500 |
| H | 1.39782800  | -2.10139100 | -3.13336200 |
| H | -0.24038000 | -2.22289000 | -3.75079500 |
| C | 0.77376300  | -0.39715000 | -4.32557700 |
| H | 1.47329200  | 0.32987300  | -3.89261800 |
| H | 1.20240100  | -0.77083100 | -5.26057400 |
| H | -0.15425100 | 0.13529800  | -4.57196400 |
| O | -0.12699400 | 4.27509800  | -1.69238900 |
| C | -0.69386600 | 3.72767400  | -2.87771300 |
| C | -0.92629700 | 3.85237200  | -0.59562100 |
| C | -1.65848100 | 2.61395500  | -2.44171800 |
| H | -1.20758300 | 4.51435100  | -3.44985700 |
| H | 0.12997100  | 3.34841900  | -3.50220000 |
| C | -1.35230700 | 2.44676300  | -0.95380700 |
| H | -0.31926900 | 3.92610200  | 0.31734200  |
| H | -1.80991600 | 4.50267500  | -0.47146100 |
| H | -1.52815500 | 1.69026600  | -3.02026500 |
| H | -2.70327000 | 2.92667000  | -2.56780200 |
| H | -0.51109200 | 1.75307500  | -0.79333800 |
| H | -2.21356000 | 2.09324500  | -0.37458200 |

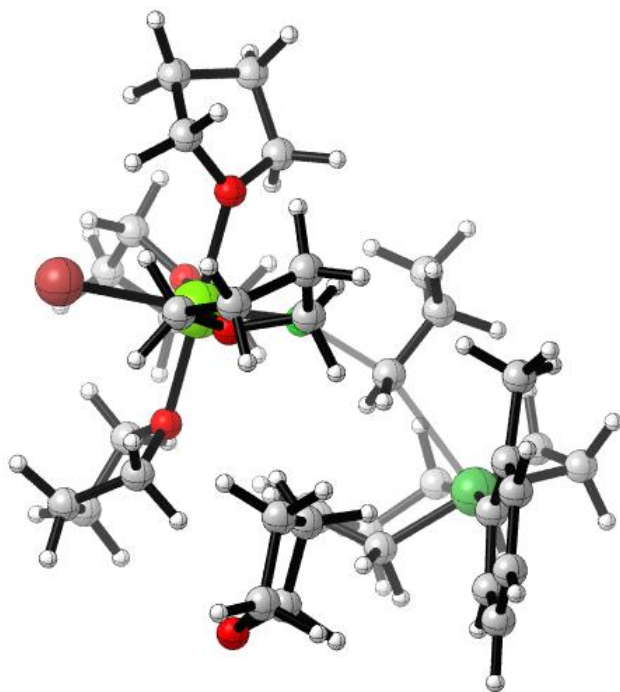

**TS10-2-methyl-up·THF**

|    |            |             |             |
|----|------------|-------------|-------------|
| Ni | 3.49230400 | 1.57738900  | -0.28933000 |
| C  | 4.60588000 | 2.47160800  | -1.66857600 |
| C  | 3.69384100 | 3.39143600  | -1.11051600 |
| C  | 3.57707400 | 3.51976700  | 0.28143800  |
| C  | 2.54574700 | 4.38345600  | 0.93905800  |
| C  | 2.14058100 | 3.92083100  | 2.35158800  |
| C  | 1.20296500 | 2.75262000  | 2.36813100  |
| C  | 1.54476200 | 1.50259800  | 1.99747100  |
| C  | 2.84801400 | 1.04774400  | 1.50881800  |
| C  | 4.11432100 | -0.18560300 | -0.76070600 |
| C  | 3.88015100 | -1.01456700 | -1.88396000 |
| C  | 4.41931800 | -2.30560500 | -1.95550400 |
| C  | 5.24568700 | -2.81071100 | -0.95958500 |
| C  | 5.56018000 | -1.98946800 | 0.11646500  |
| C  | 4.99460700 | -0.71989600 | 0.20207000  |
| H  | 5.60098900 | 2.35915700  | -1.23141100 |
| H  | 4.57502800 | 2.28272900  | -2.74020200 |
| H  | 2.87387800 | 3.77097500  | -1.72878200 |
| H  | 4.49958000 | 3.41291800  | 0.86983300  |

|    |             |             |             |   |             |             |             |
|----|-------------|-------------|-------------|---|-------------|-------------|-------------|
| H  | 1.64224400  | 4.45110800  | 0.30897700  | H | -1.30525800 | 2.69861500  | 0.76588700  |
| H  | 2.93555700  | 5.41087300  | 1.01842900  | H | -2.30979200 | 3.53332200  | -0.44343000 |
| H  | 3.06515200  | 3.68051600  | 2.90302400  | H | -4.71903700 | 2.46189500  | 2.43419000  |
| H  | 1.68548200  | 4.76699800  | 2.88205400  | H | -5.33269100 | 3.77315100  | 1.42312200  |
| H  | 0.17904100  | 2.94740100  | 2.70032500  | H | -2.66658000 | 3.56788800  | 2.55975000  |
| H  | 0.74160100  | 0.75362600  | 1.99711200  | H | -3.15908300 | 4.76935200  | 1.36886800  |
| H  | 2.92347900  | -0.03868300 | 1.59965600  | O | -3.05832700 | -0.18052700 | -2.11299000 |
| H  | 3.65906300  | 1.48979700  | 2.11360700  | C | -2.99086500 | 1.04766200  | -2.85920200 |
| H  | 4.19295300  | -2.92237900 | -2.82789700 | C | -4.16447900 | -0.95760300 | -2.59668600 |
| H  | 6.23042300  | -2.34087000 | 0.90052400  | C | -4.28777000 | 1.13092000  | -3.66517900 |
| C  | 1.00675600  | 1.25300700  | -1.00616700 | H | -2.88627900 | 1.86042200  | -2.13154800 |
| H  | 1.35606400  | 0.23535200  | -0.87040400 | H | -2.09049000 | 1.03794000  | -3.48916900 |
| F  | -0.77975900 | 0.78125100  | -0.85075600 | C | -5.17978100 | 0.08640100  | -2.99855700 |
| Mg | -2.22044600 | -0.25020400 | -0.08943200 | H | -3.83594200 | -1.56146700 | -3.45931800 |
| Br | -4.29692700 | -1.34904600 | 0.85011500  | H | -4.48756200 | -1.60839700 | -1.77828900 |
| O  | -1.39183500 | -0.32821500 | 1.90542200  | H | -4.11039800 | 0.86003400  | -4.71307500 |
| C  | -1.93420200 | 0.56858000  | 2.89807900  | H | -4.71597900 | 2.13807600  | -3.65376800 |
| C  | -1.05230600 | -1.58408600 | 2.54061000  | H | -5.96375800 | -0.30012500 | -3.65582900 |
| C  | -1.64453700 | -0.08517000 | 4.23266400  | H | -5.65254600 | 0.48759700  | -2.09177600 |
| H  | -1.45338700 | 1.54674600  | 2.77230400  | O | -1.27943800 | -2.06805300 | -0.75009400 |
| H  | -3.01618500 | 0.65956800  | 2.72147700  | C | -0.32581100 | -1.96941700 | -1.83305400 |
| C  | -1.76065100 | -1.56214900 | 3.87616800  | C | -1.93066500 | -3.35866500 | -0.79372600 |
| H  | -1.34734900 | -2.39925800 | 1.87161200  | C | -0.67669800 | -3.10091300 | -2.77301500 |
| H  | 0.03554100  | -1.60924900 | 2.69010800  | H | -0.42011800 | -0.97072700 | -2.26887800 |
| H  | -2.33936100 | 0.23923900  | 5.01257600  | H | 0.68626400  | -2.08905200 | -1.41469800 |
| H  | -0.62159600 | 0.15365000  | 4.55543000  | C | -1.13946500 | -4.17453500 | -1.79690100 |
| H  | -2.81278400 | -1.85178200 | 3.76048600  | H | -1.94797800 | -3.77481600 | 0.22046500  |
| H  | -1.28560900 | -2.22795000 | 4.60216300  | H | -2.97232500 | -3.21502300 | -1.11002600 |
| O  | -3.06060300 | 1.74346800  | 0.26356500  | H | 0.17273100  | -3.40167100 | -3.39409300 |
| C  | -4.44316700 | 2.10685800  | 0.32919300  | H | -1.50258300 | -2.80238300 | -3.43457500 |
| C  | -2.33569300 | 2.95422400  | 0.49512700  | H | -0.27307600 | -4.64667300 | -1.31655300 |
| C  | -4.52459700 | 3.04295400  | 1.52559100  | H | -1.74570100 | -4.95976900 | -2.25758200 |
| H  | -4.71576700 | 2.62235600  | -0.61015200 | H | 5.65785000  | -3.81501100 | -1.03885100 |
| H  | -5.01956900 | 1.18143200  | 0.42936200  | H | 0.95336600  | 1.87639400  | -0.11963700 |
| C  | -3.12777600 | 3.69499400  | 1.57391000  | H | 5.23599100  | -0.12790500 | 1.08833600  |

|   |             |             |             |
|---|-------------|-------------|-------------|
| C | 3.05335900  | -0.56171700 | -3.05669500 |
| H | 1.97072700  | -0.62187500 | -2.86774900 |
| H | 3.27339300  | 0.47966900  | -3.31755100 |
| H | 3.25084400  | -1.17556800 | -3.94359000 |
| C | 0.91899200  | 1.87113300  | -2.35393200 |
| H | 1.94154400  | 2.03533900  | -2.71743300 |
| H | 0.47969400  | 1.14464300  | -3.05321900 |
| C | 0.13907600  | 3.17347200  | -2.36772100 |
| H | 0.54928100  | 3.88812900  | -1.64208200 |
| H | -0.90738300 | 2.99492800  | -2.10238300 |
| H | 0.16998600  | 3.64398800  | -3.35562500 |
| O | 2.28588200  | -3.69433800 | 2.87068500  |
| C | 2.53136700  | -2.41598100 | 2.31262900  |
| C | 2.47243200  | -4.58328100 | 1.79158600  |
| C | 1.93547100  | -2.44285800 | 0.89484300  |
| H | 2.09345700  | -1.65982500 | 2.97422500  |
| H | 3.61722800  | -2.22417700 | 2.25482300  |
| C | 1.70260600  | -3.94104200 | 0.64301000  |
| H | 3.54571200  | -4.65448700 | 1.52980500  |
| H | 2.11420300  | -5.57414700 | 2.08887600  |
| H | 2.63730000  | -2.00904200 | 0.17594800  |
| H | 0.99678200  | -1.87510100 | 0.82767400  |
| H | 2.05514400  | -4.26563600 | -0.34417800 |
| H | 0.63591400  | -4.19254100 | 0.73463000  |

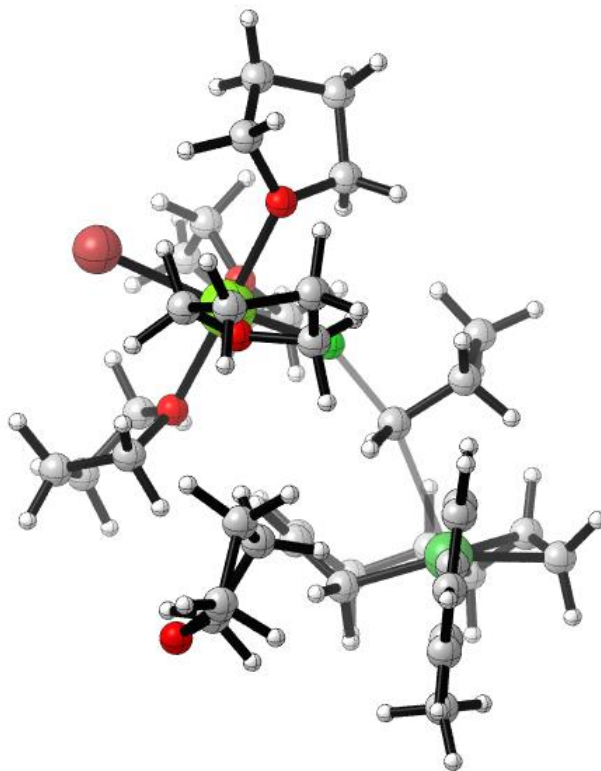

**TS10-2-methyl-down·THF**

|    |             |             |             |
|----|-------------|-------------|-------------|
| Ni | -3.35104200 | -1.61967100 | -0.47917600 |
| C  | -4.37947600 | -2.44185100 | -1.96567300 |
| C  | -3.49837400 | -3.38618000 | -1.39838400 |
| C  | -3.47071200 | -3.59567000 | -0.01191900 |
| C  | -2.46794000 | -4.48678400 | 0.65152900  |
| C  | -2.12074700 | -4.07292300 | 2.09474000  |
| C  | -1.17471100 | -2.91555100 | 2.17124000  |
| C  | -1.49009200 | -1.64936400 | 1.83350800  |
| C  | -2.77776600 | -1.14302200 | 1.35223600  |
| C  | -3.85722200 | 0.15500900  | -1.00715100 |
| C  | -4.98523100 | 0.74132700  | -0.38034000 |
| C  | -5.37049500 | 2.05378400  | -0.66219400 |
| C  | -4.68308100 | 2.83441500  | -1.58827500 |
| C  | -3.60961000 | 2.26832200  | -2.26099600 |
| C  | -3.22228100 | 0.95916200  | -1.96846700 |
| H  | -5.40906900 | -2.37231100 | -1.60607200 |
| H  | -4.26466200 | -2.17586900 | -3.01513600 |

|    |             |             |             |   |             |             |             |
|----|-------------|-------------|-------------|---|-------------|-------------|-------------|
| H  | -2.63182300 | -3.71949000 | -1.97892000 | H | 5.01102100  | -1.25867700 | 0.48729700  |
| H  | -4.42674900 | -3.52499800 | 0.52699800  | C | 3.06032600  | -3.92776400 | 1.07317200  |
| H  | -1.54059200 | -4.52363800 | 0.05308200  | H | 1.27404100  | -2.72910800 | 0.48462800  |
| H  | -2.85639500 | -5.51747500 | 0.67490900  | H | 2.23389600  | -3.35830300 | -0.87393200 |
| H  | -3.06476600 | -3.83852000 | 2.61453100  | H | 4.46841500  | -2.77503100 | 2.28462000  |
| H  | -1.69413700 | -4.93722300 | 2.61965900  | H | 5.26741200  | -3.92298100 | 1.20256300  |
| H  | -0.15373200 | -3.13538700 | 2.49745300  | H | 2.53494300  | -4.08786800 | 2.02093900  |
| H  | -0.66825800 | -0.92583000 | 1.85774200  | H | 3.17190500  | -4.90832500 | 0.59952000  |
| H  | -2.82431100 | -0.05356900 | 1.48172900  | O | 3.21077900  | 0.43996100  | -1.99300500 |
| H  | -3.60228300 | -1.59211700 | 1.93069000  | C | 3.16294800  | -0.67009600 | -2.90482400 |
| H  | -6.23597600 | 2.47181600  | -0.14497800 | C | 4.33497100  | 1.26356000  | -2.33583300 |
| H  | -3.07108600 | 2.83807600  | -3.01994500 | C | 4.51548200  | -0.69667500 | -3.62279800 |
| C  | -0.90167100 | -1.14078800 | -1.09163900 | H | 2.97231800  | -1.56977700 | -2.30958800 |
| H  | -1.23728600 | -0.16382400 | -0.76085300 | H | 2.31848300  | -0.53298400 | -3.59440500 |
| F  | 0.87720700  | -0.68609400 | -0.98954700 | C | 5.37032000  | 0.26717300  | -2.80166100 |
| Mg | 2.27352500  | 0.25958300  | -0.02516100 | H | 4.04335700  | 1.95686100  | -3.14250900 |
| Br | 4.29435400  | 1.27358000  | 1.12108300  | H | 4.61571400  | 1.81936500  | -1.43628400 |
| O  | 1.40332300  | 0.08092300  | 1.91441000  | H | 4.41343600  | -0.32690300 | -4.65007900 |
| C  | 1.96397800  | -0.88893300 | 2.82821700  | H | 4.93462200  | -1.70619500 | -3.67827600 |
| C  | 0.92724900  | 1.22069100  | 2.66217900  | H | 6.18325200  | 0.72180400  | -3.37488300 |
| C  | 1.54174800  | -0.43243100 | 4.20864000  | H | 5.80240200  | -0.23075800 | -1.92356300 |
| H  | 1.57723200  | -1.87688800 | 2.55000800  | O | 1.30251500  | 2.12544500  | -0.53205800 |
| H  | 3.05705600  | -0.86974700 | 2.71002600  | C | 0.40693800  | 2.12947100  | -1.66882000 |
| C  | 1.53565400  | 1.08184900  | 4.03943700  | C | 1.93374900  | 3.42133200  | -0.40647800 |
| H  | 1.22290700  | 2.13045200  | 2.12929800  | C | 0.80948700  | 3.33785200  | -2.48429000 |
| H  | -0.17043800 | 1.16461200  | 2.69852500  | H | 0.53007700  | 1.17491100  | -2.18648200 |
| H  | 2.22645000  | -0.78442800 | 4.98564300  | H | -0.62807400 | 2.20471700  | -1.29999900 |
| H  | 0.53378200  | -0.80094500 | 4.44106700  | C | 1.22651800  | 4.32347100  | -1.40029200 |
| H  | 2.56048900  | 1.47361400  | 4.03917400  | H | 1.85239900  | 3.75013200  | 0.63638300  |
| H  | 0.95507600  | 1.60762500  | 4.80294800  | H | 3.00258500  | 3.31452700  | -0.63544600 |
| O  | 3.05902500  | -1.75682000 | 0.14372300  | H | -0.00560300 | 3.70168600  | -3.11783700 |
| C  | 4.43069200  | -2.15218400 | 0.23296900  | H | 1.66494100  | 3.09147300  | -3.12931900 |
| C  | 2.29276000  | -2.96772800 | 0.15522600  | H | 0.34106700  | 4.78616100  | -0.94796300 |
| C  | 4.41936100  | -3.23811300 | 1.29214000  | H | 1.87941600  | 5.12308900  | -1.76224600 |
| H  | 4.75201800  | -2.54598000 | -0.74845900 | H | -4.99936300 | 3.85569400  | -1.79367900 |



|   |             |             |             |
|---|-------------|-------------|-------------|
| H | -0.78732200 | -1.90848100 | -0.33159900 |
| H | -2.38339500 | 0.56129300  | -2.54380300 |
| C | -5.79971200 | -0.03992500 | 0.61428500  |
| H | -5.98777100 | -1.06269000 | 0.26147400  |
| H | -5.28775400 | -0.13126600 | 1.58098500  |
| H | -6.77166800 | 0.43179000  | 0.80101600  |
| C | -0.91131200 | -1.51129200 | -2.53116100 |
| H | -1.95880400 | -1.61571900 | -2.84332500 |
| H | -0.51426400 | -0.66994800 | -3.11666100 |
| C | -0.13172200 | -2.78019200 | -2.83349200 |
| H | -0.44767000 | -3.60499800 | -2.18078000 |
| H | 0.94009900  | -2.62343300 | -2.67141700 |
| H | -0.27877200 | -3.09863300 | -3.87024500 |
| O | -2.84989500 | 4.00739800  | 2.67147400  |
| C | -2.62929600 | 2.63476100  | 2.39194500  |
| C | -2.95317300 | 4.66163700  | 1.42522400  |
| C | -1.99492300 | 2.55483300  | 0.99027300  |
| H | -1.99354400 | 2.22959300  | 3.19189700  |
| H | -3.58253200 | 2.08053500  | 2.41636400  |
| C | -1.86349300 | 4.02368500  | 0.58138800  |
| H | -3.94148900 | 4.48149200  | 0.96092200  |
| H | -2.83394700 | 5.73746800  | 1.59236500  |
| H | -2.65919200 | 2.02376300  | 0.30007000  |
| H | -1.02977800 | 2.03010800  | 0.97927300  |
| H | -2.00343300 | 4.17710500  | -0.49678400 |
| H | -0.88607200 | 4.43142100  | 0.88023300  |

## References

- S1. T. Iwasaki, X. Min, A. Fukuoka, H. Kuniyasu and N. Kambe, *Angew. Chem. Int. Ed.*, 2016, **55**, 5550.
- S2. R. Benn, B. Büssemeier, S. Holle, P. W. Jolly, R. Mynott, I. Tkatchenko and G. Wilke, *J. Organomet. Chem.*, 1985, **279**, 63.
- S3. S. Tobisch, *Chem. Eur. J.*, 2003, **9**, 1217.
- S4. D. Alberti, R. Goddard, A. Ruffinska and K.-R. Pörschke, *Organometallics*, 2003, **22**, 4025.
- S5. P. W. Jolly, *Angew. Chem. Int. Ed.*, 1985, **24**, 283.
- S6. G. M. Sheldrick, *Acta. Cryst. A*, 2008, **64**, 112.
- S7. T. Iwasaki, A. Fukuoka, X. Min, W. Yokoyama, H. Kuniyasu and N. Kambe, *Org. Lett.*, 2016, **18**, 4868.
- S8. P. H. M. Budzelaar, *gNMR*, version 5.06; University of Manitoba: Canada, 2006; <https://home.cc.umanitoba.ca/~budzelaa/gNMR/gNMR-license>.
- S9. A. M. Pangborn, M. A. Giardello, R. H. Grubbs, R. K. Rosen and F. J. Timmers, *Organometallics*, 1996, **15**, 1518.
- S10. T. Iwasaki, R. Shimizu, R. Imanishi, H. Kuniyasu and N. Kambe, *Angew. Chem. Int. Ed.*, 2015, **54**, 9347.
- S11. Z. Mo, Q. Zhang and L. Deng, *Organometallics*, 2012, **31**, 6518.
- S12. G. Cahiez, C. Chaboche, C. Duplais and A. Moyeux, *Org. Lett.*, 2009, **11**, 277.
- S13. Z. Jia, Q. Liu, X.-S. Peng and H. N. C. Wong, *Nat. Commun.*, 2016, **7**, 10614.
- S14. H. Hamaguchi, M. Uemura, H. Yasui, H. Yorimitsu and K. Oshima, *Chem. Lett.*, 2008, **37**, 1178.

<sup>1</sup>H NMR of 3aa

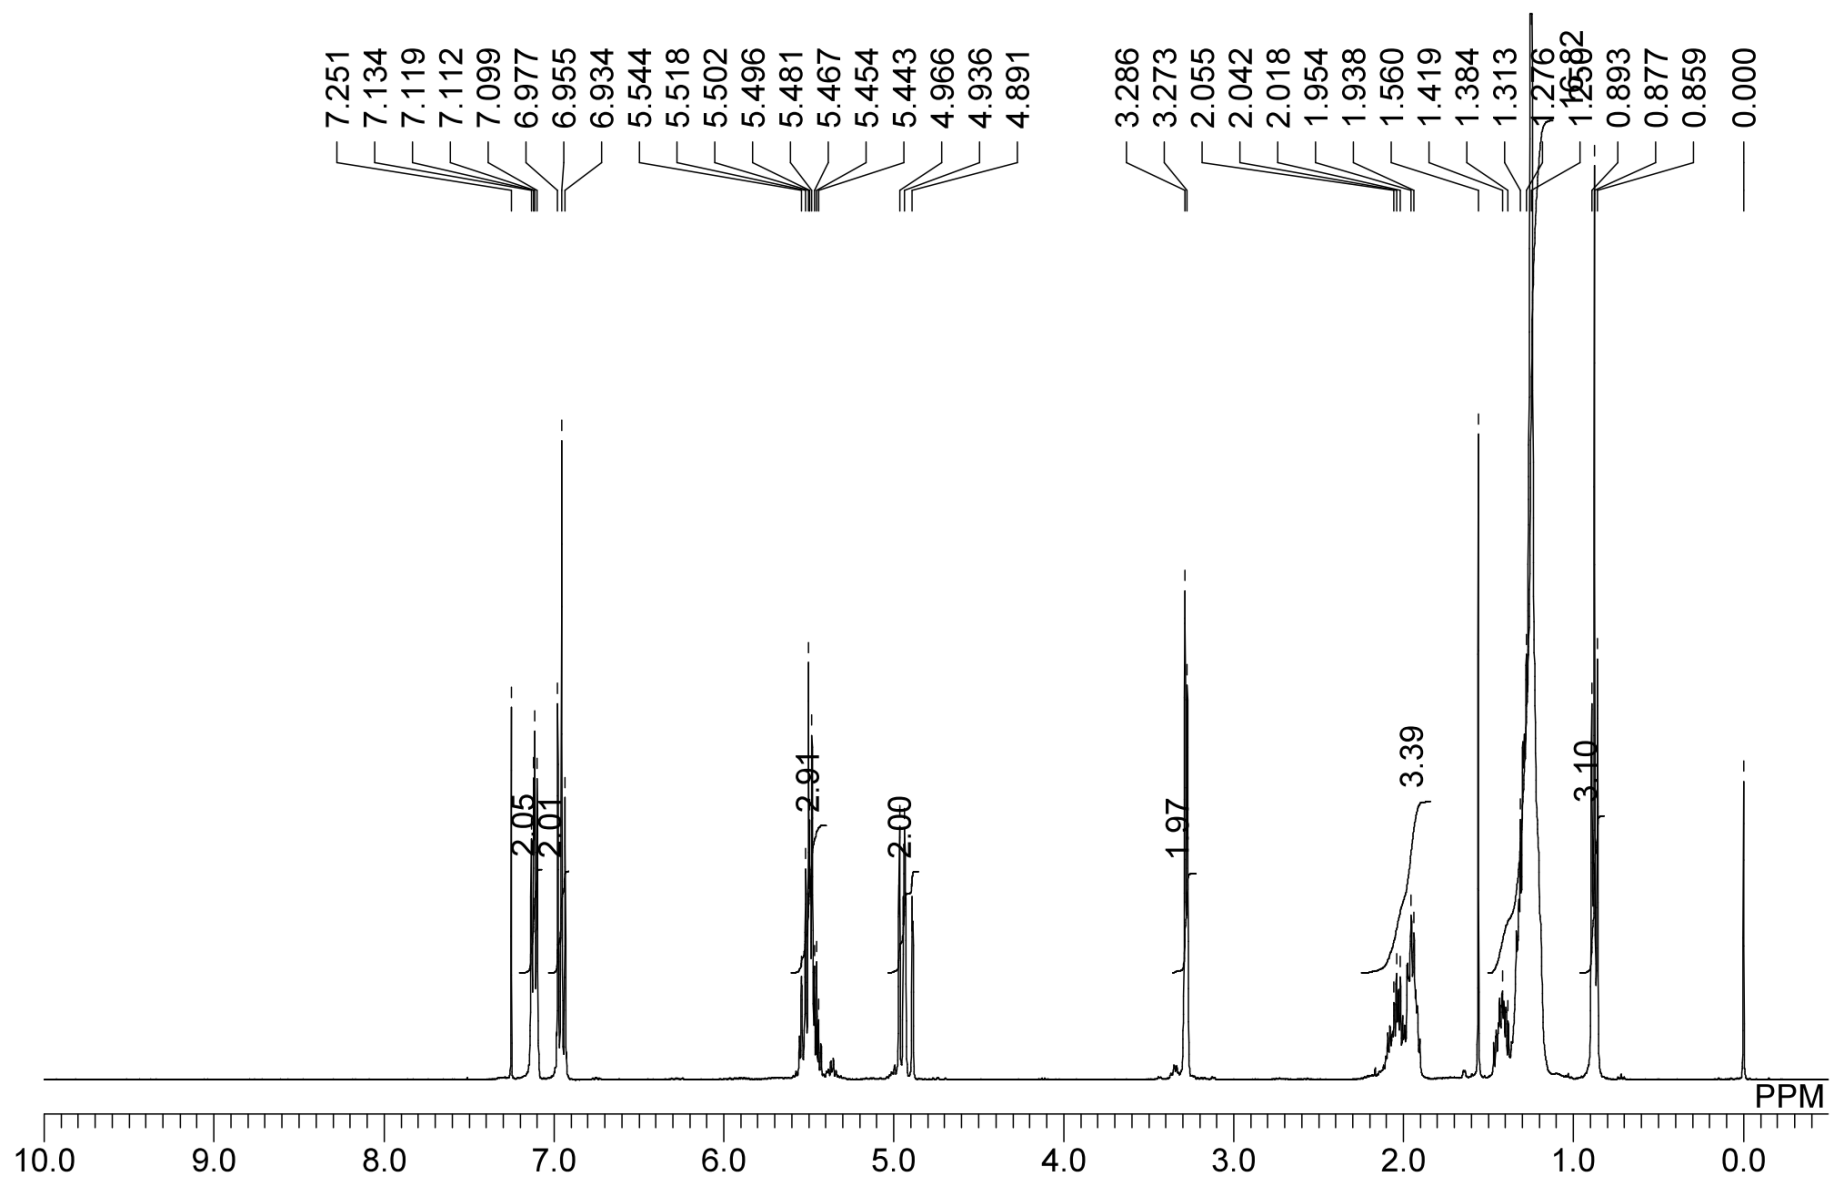

$^{13}\text{C}\{^1\text{H}\}$  NMR of **3aa**

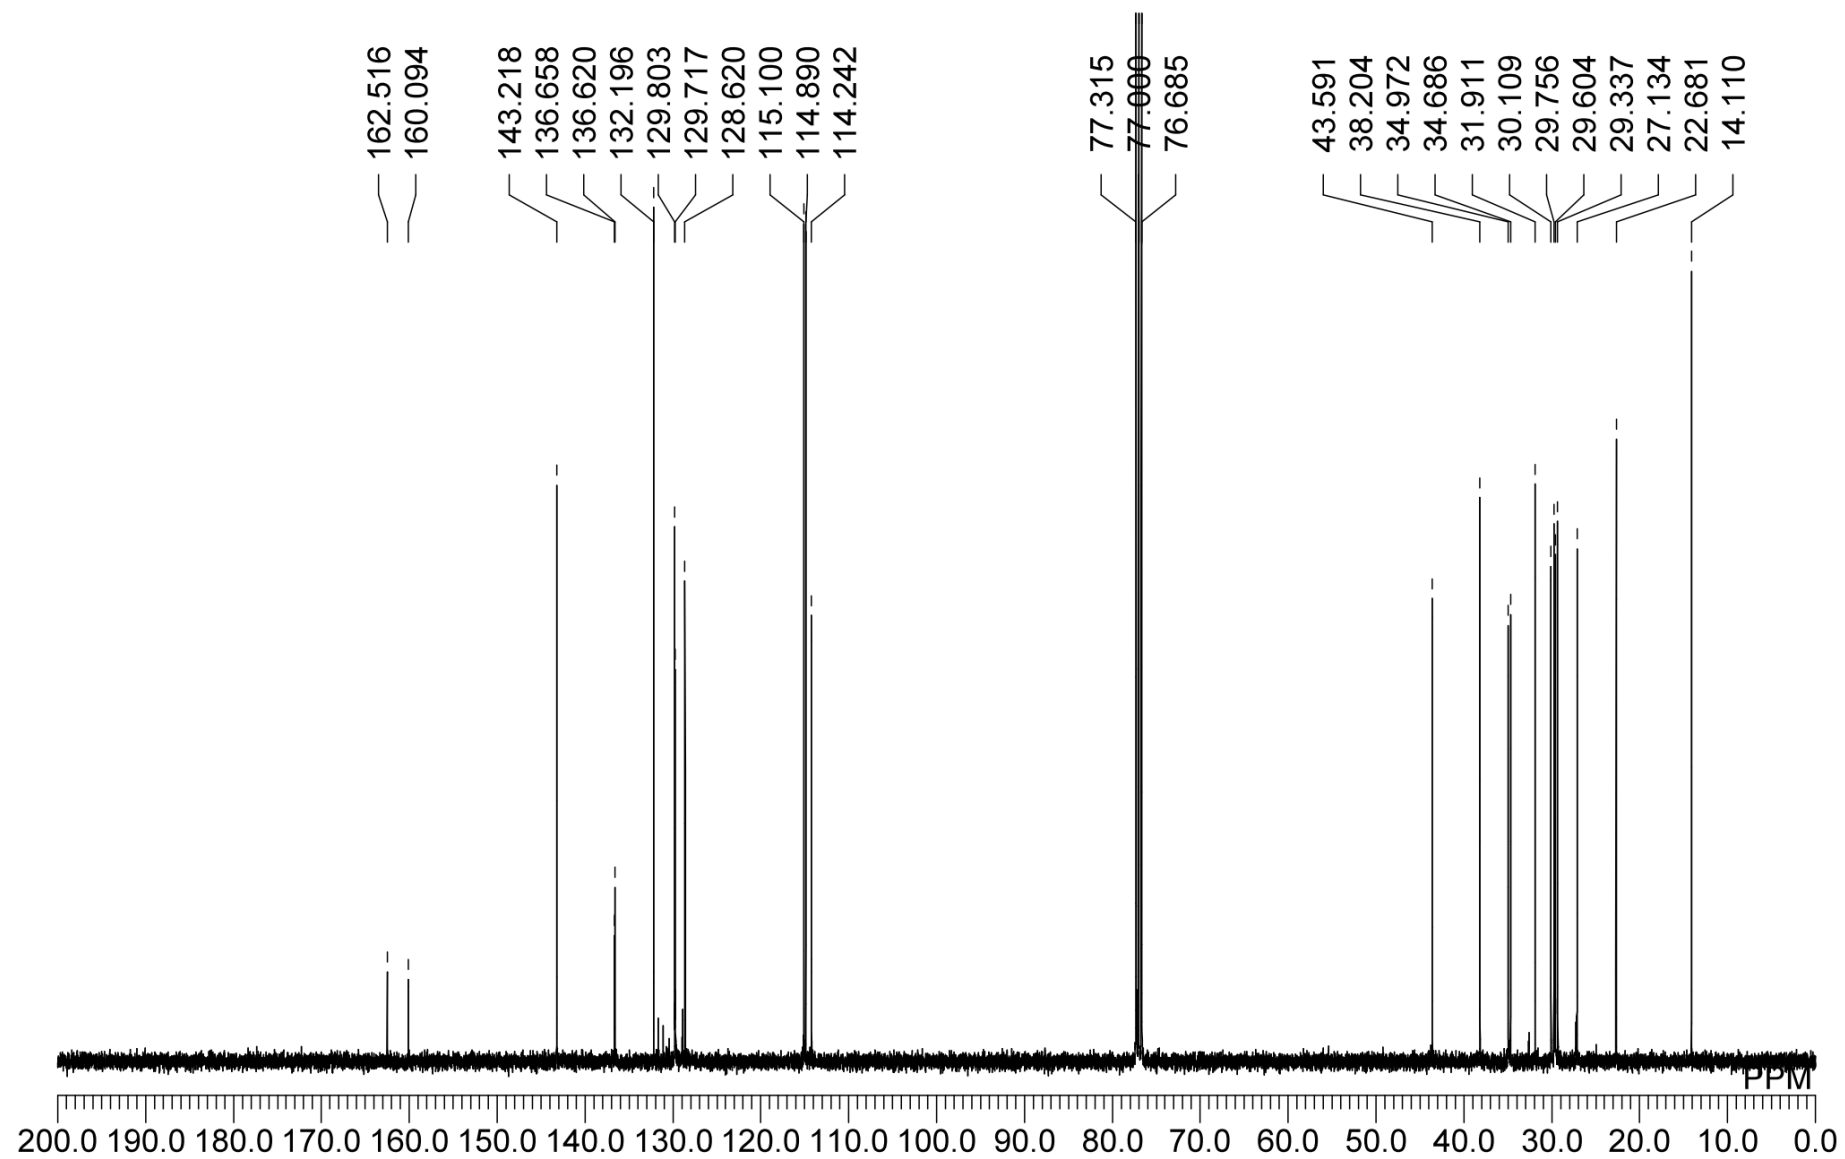

<sup>1</sup>H NMR of 3ba

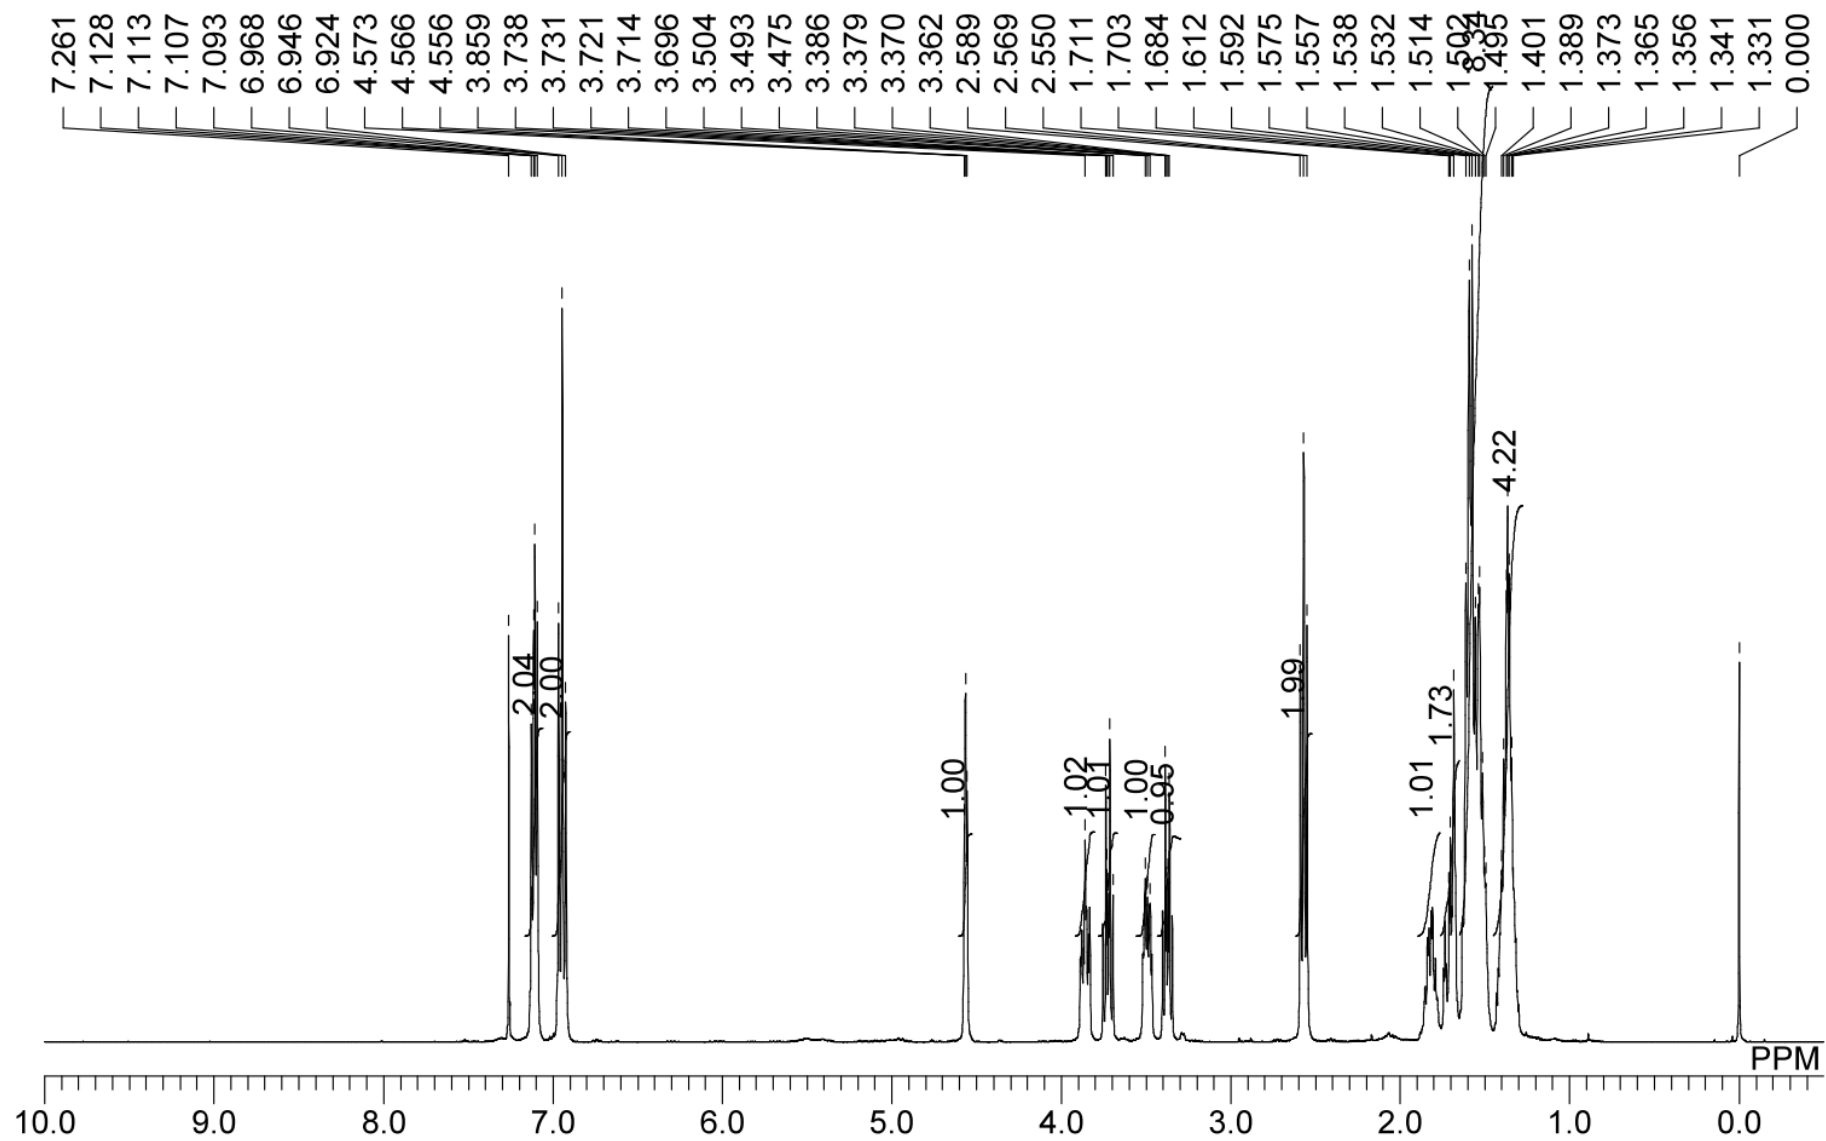

$^{13}\text{C}\{^1\text{H}\}$  NMR of **3ba**

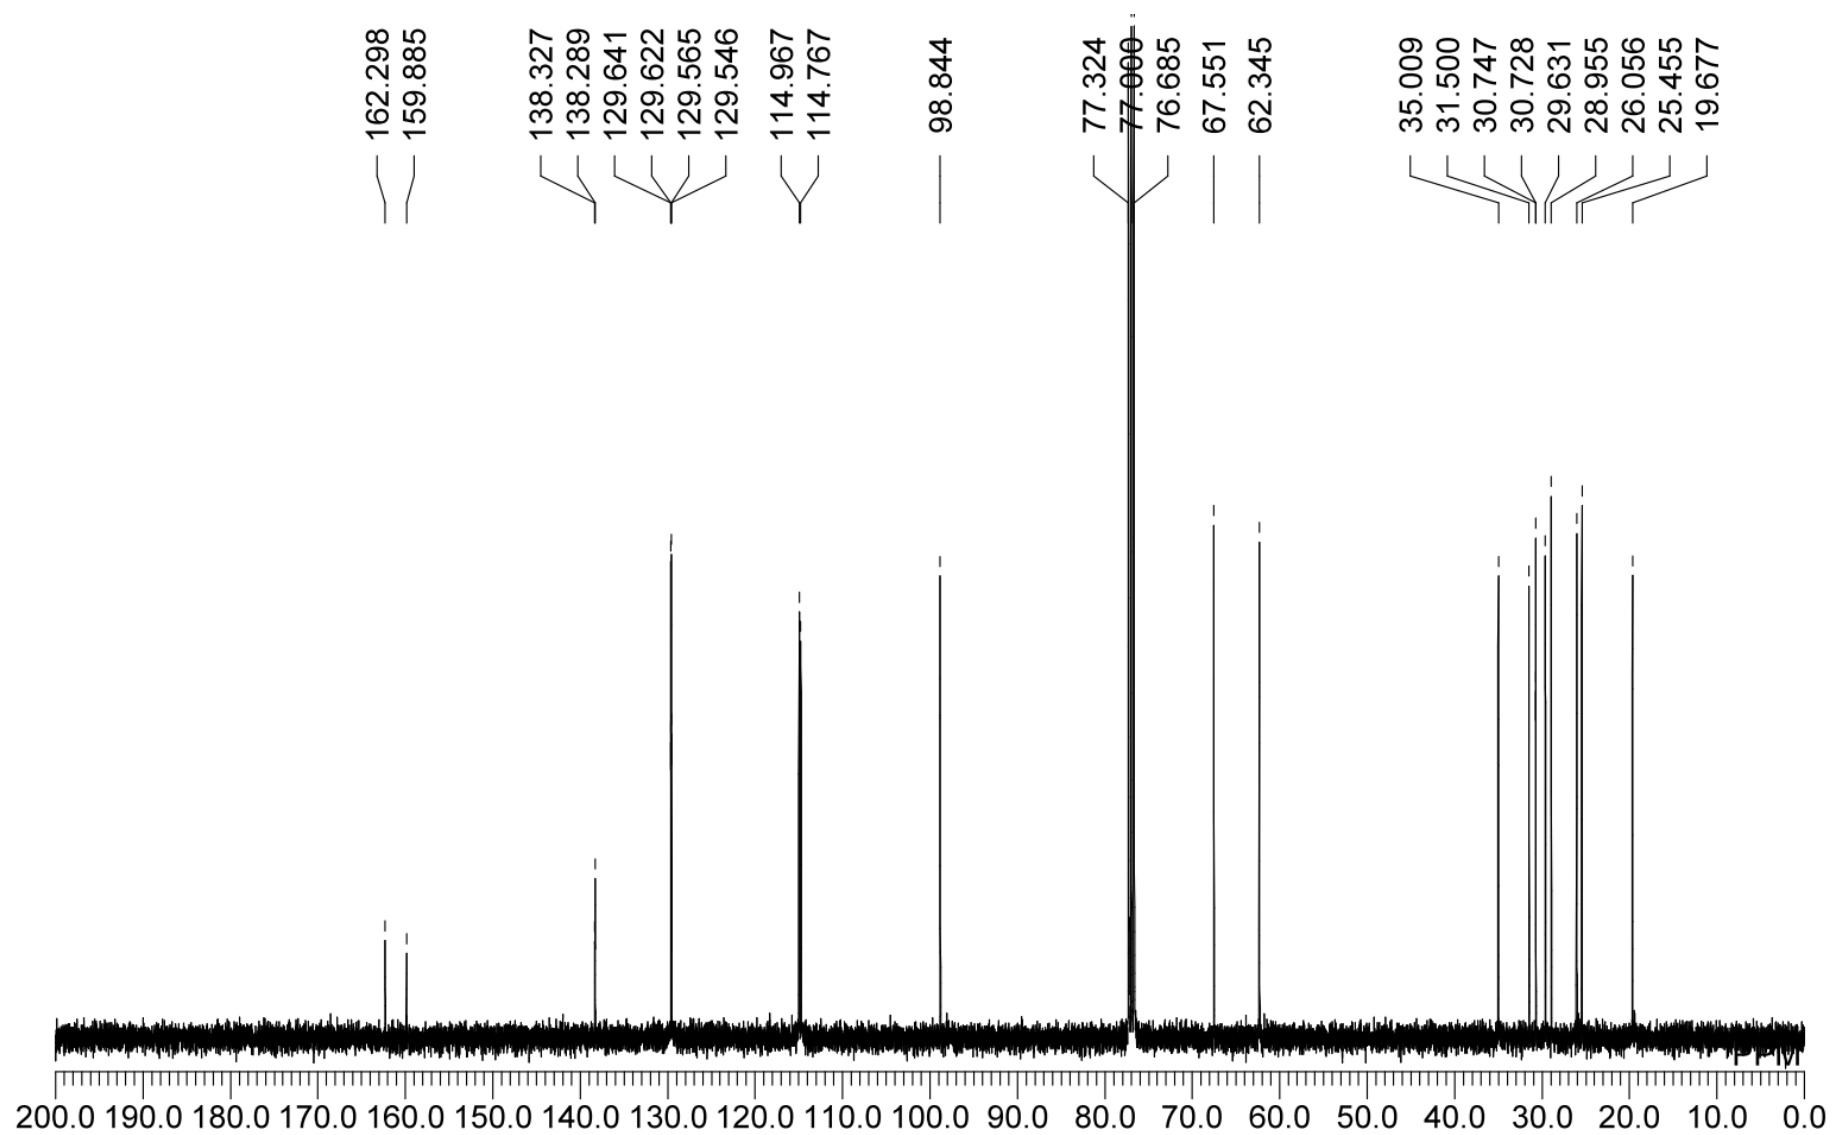

<sup>1</sup>H NMR of 3ca

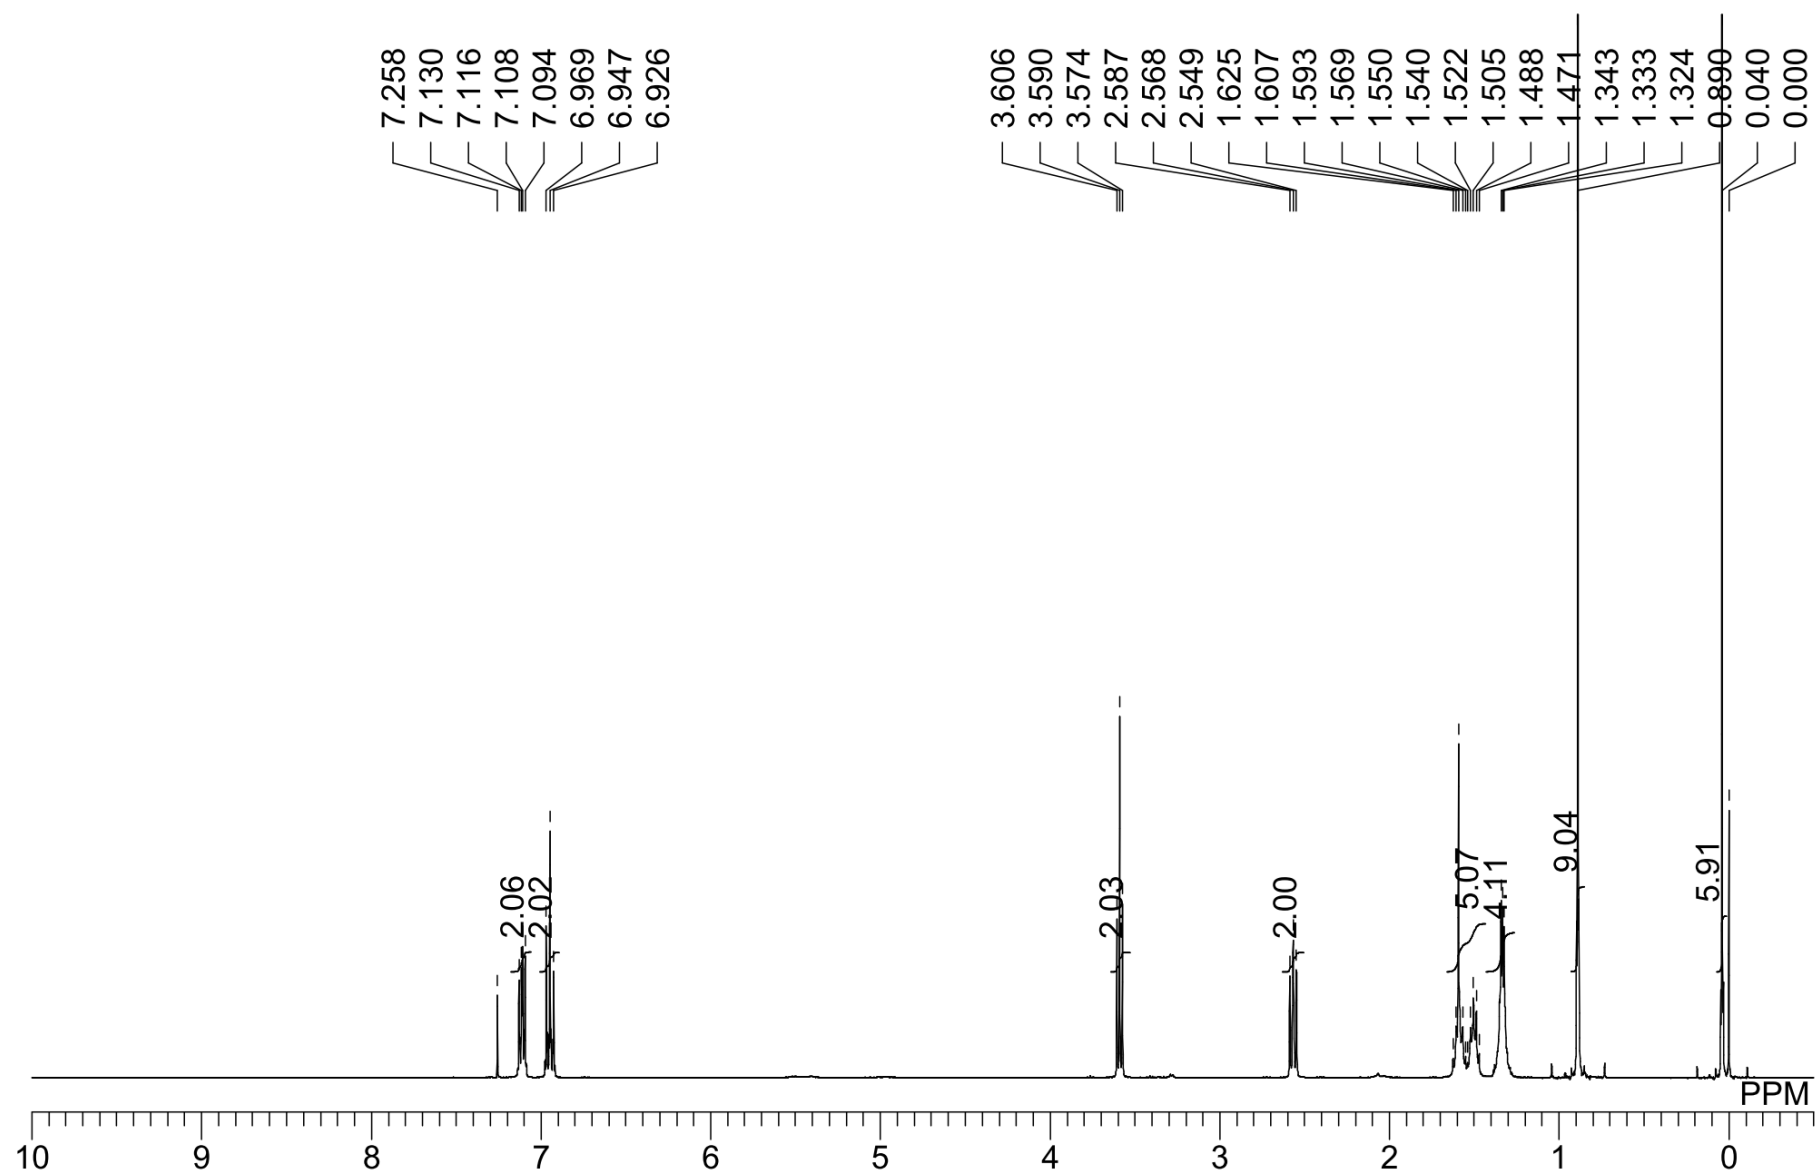

$^{13}\text{C}\{^1\text{H}\}$  NMR of **3ca**

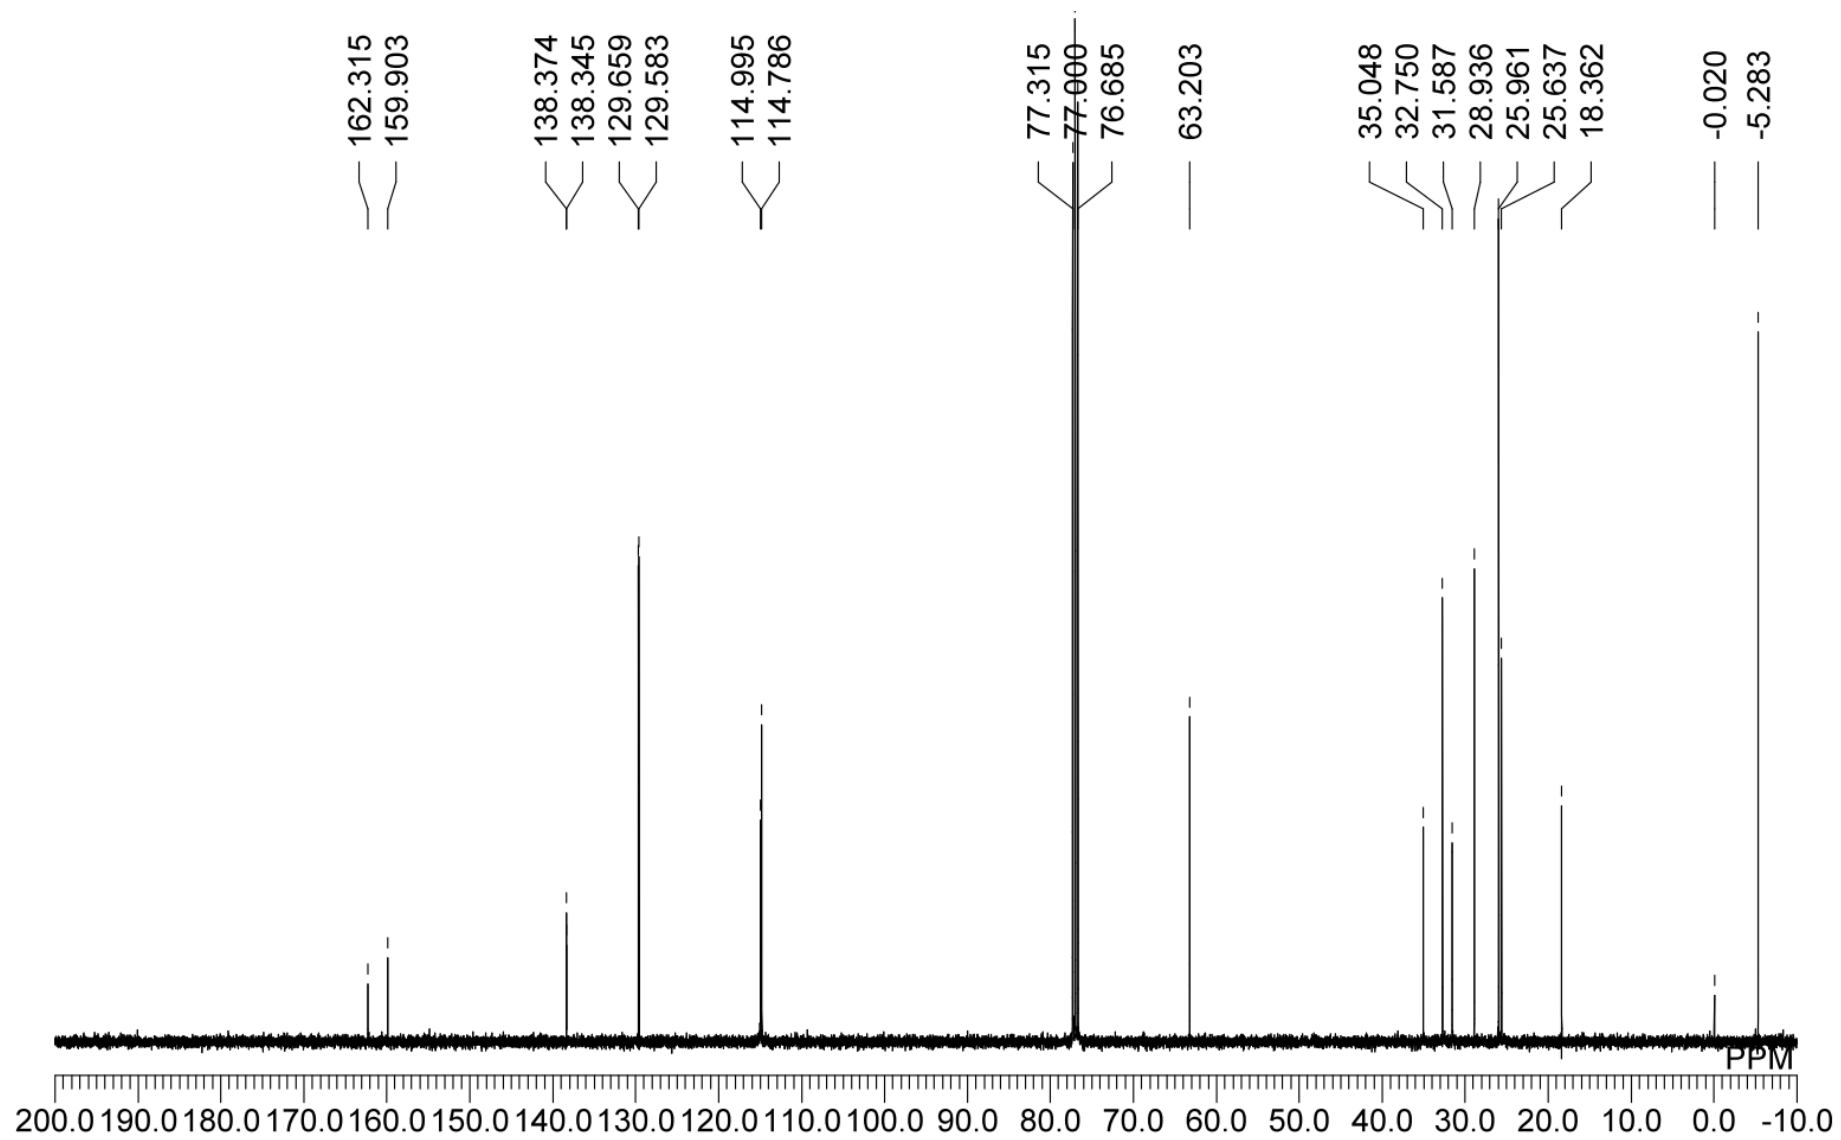



<sup>1</sup>H NMR of 3da

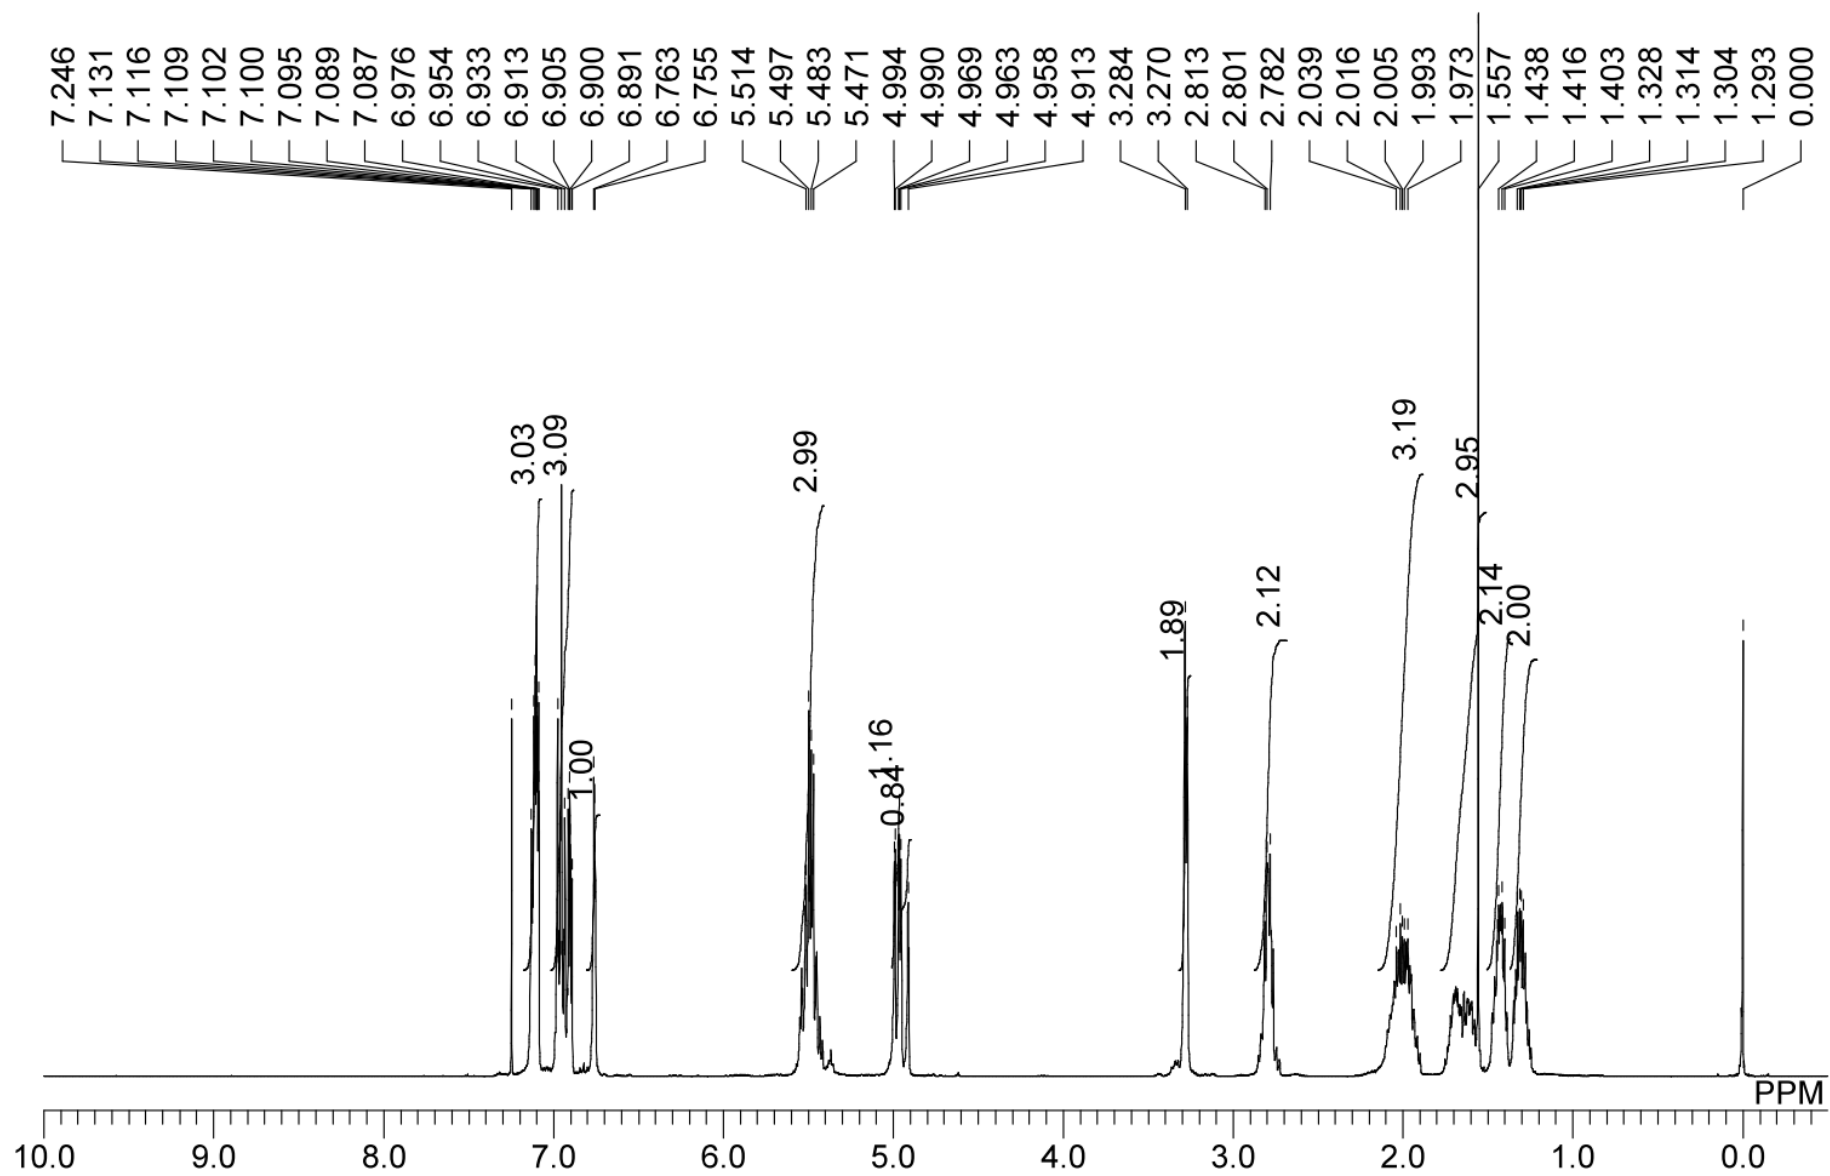

$^{13}\text{C}\{^1\text{H}\}$  NMR of **3da**

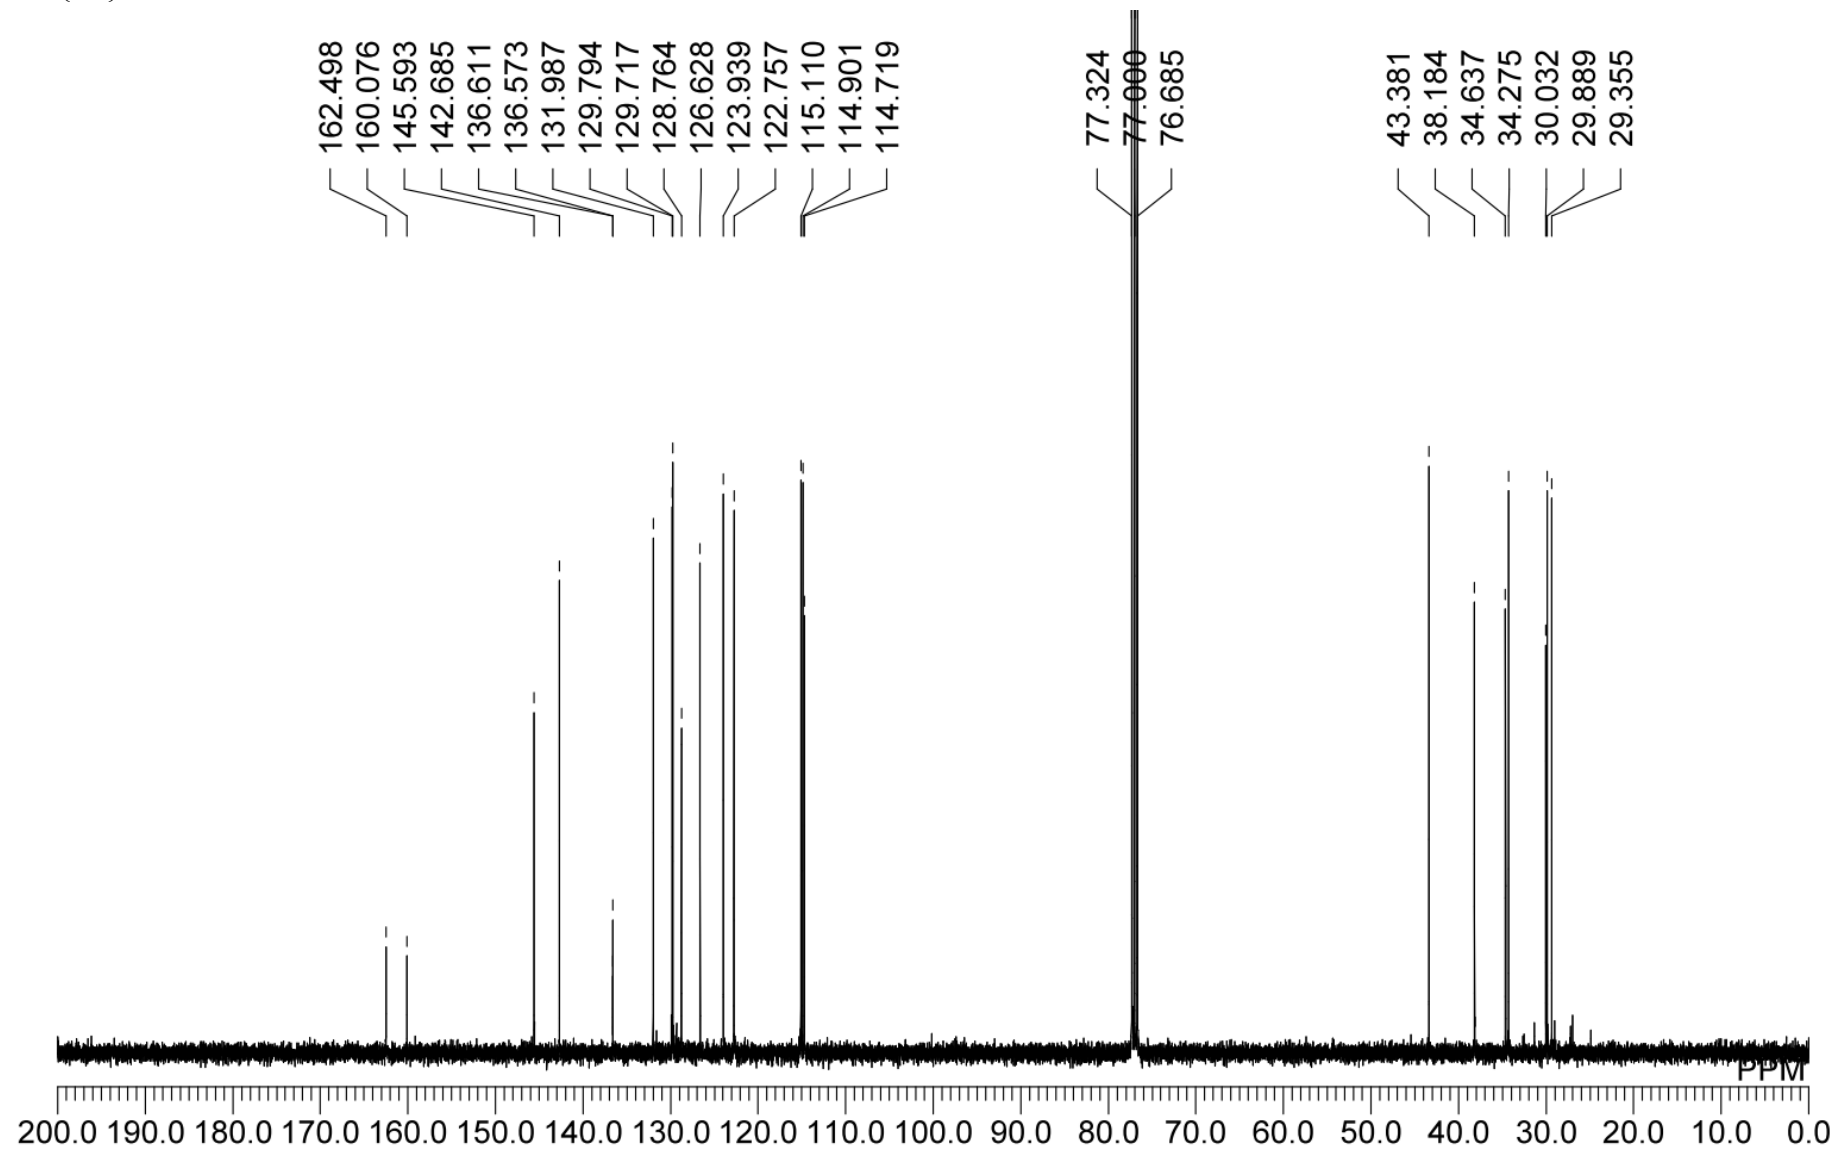

<sup>1</sup>H NMR of 3ea

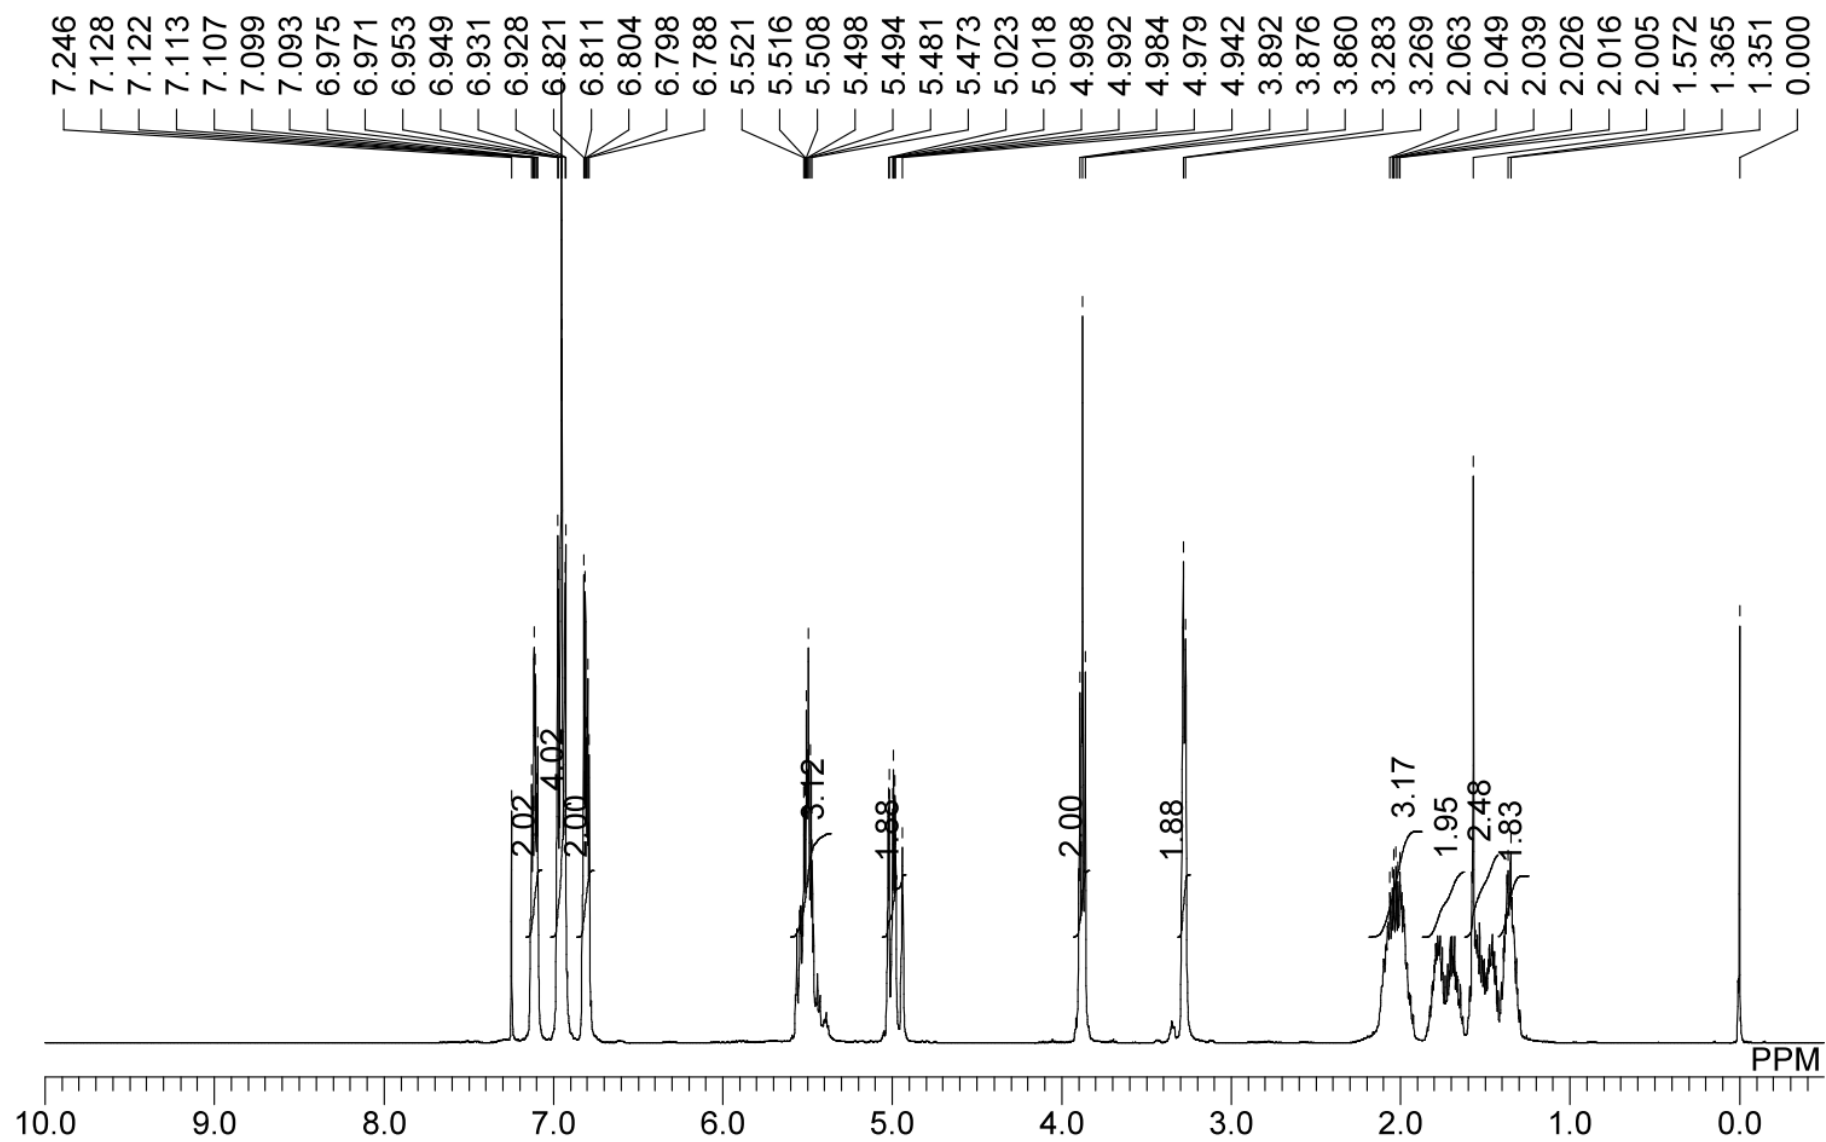

$^{13}\text{C}\{^1\text{H}\}$  NMR of **3ea**

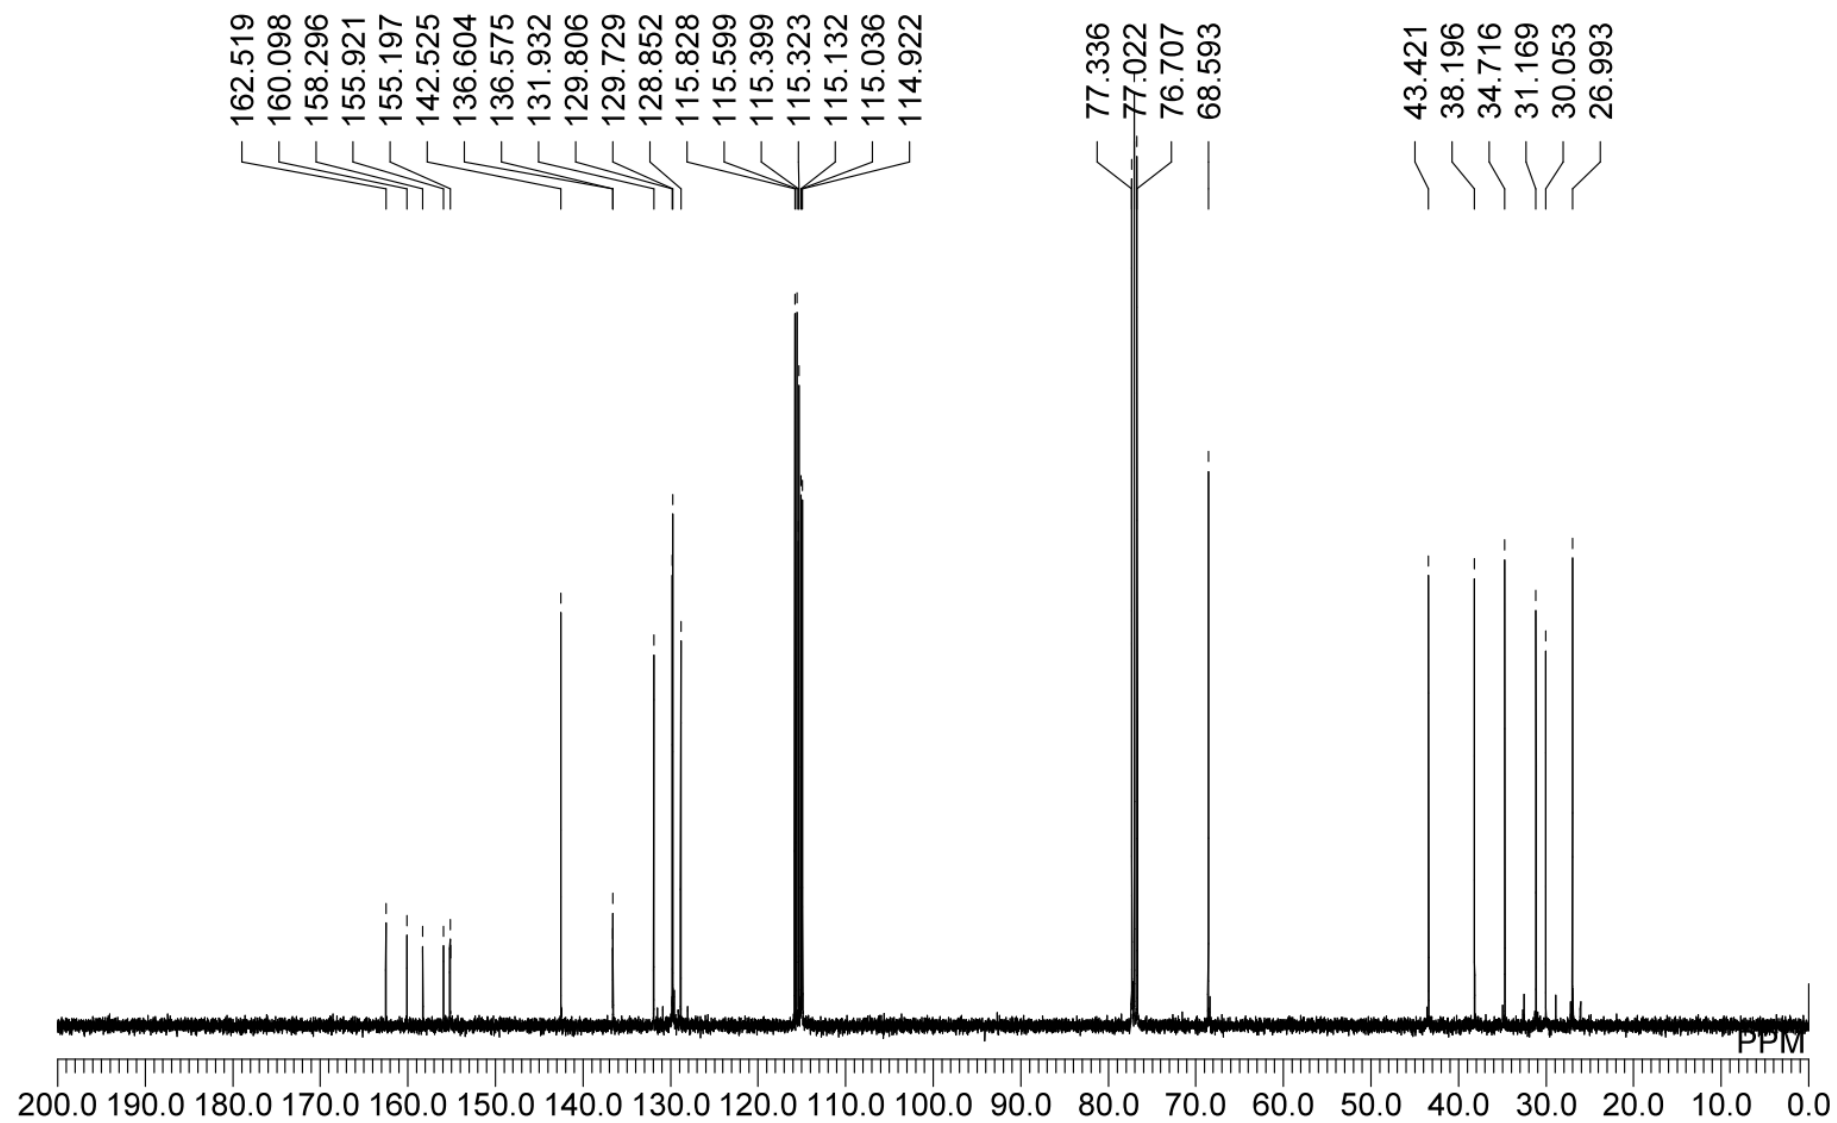

<sup>1</sup>H NMR of 3fa

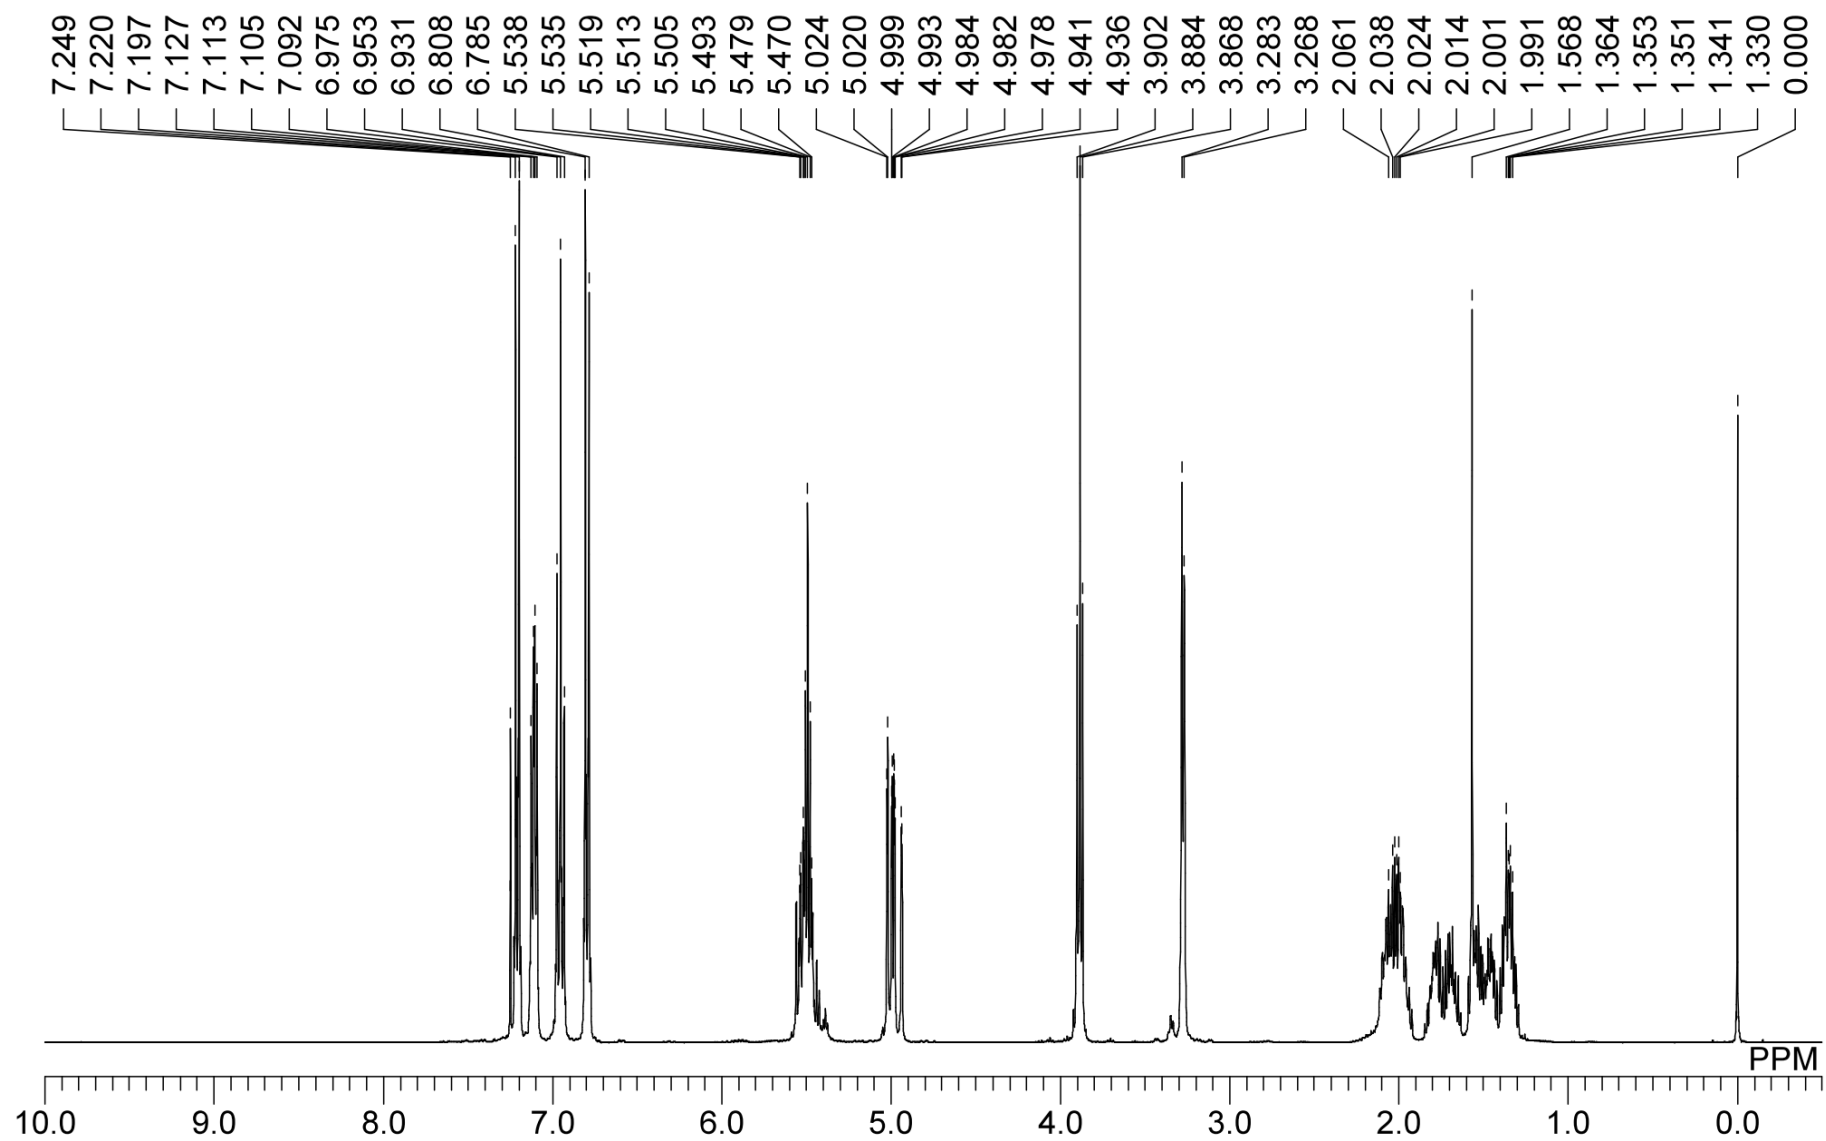

$^{13}\text{C}\{^1\text{H}\}$  NMR of **3fa**

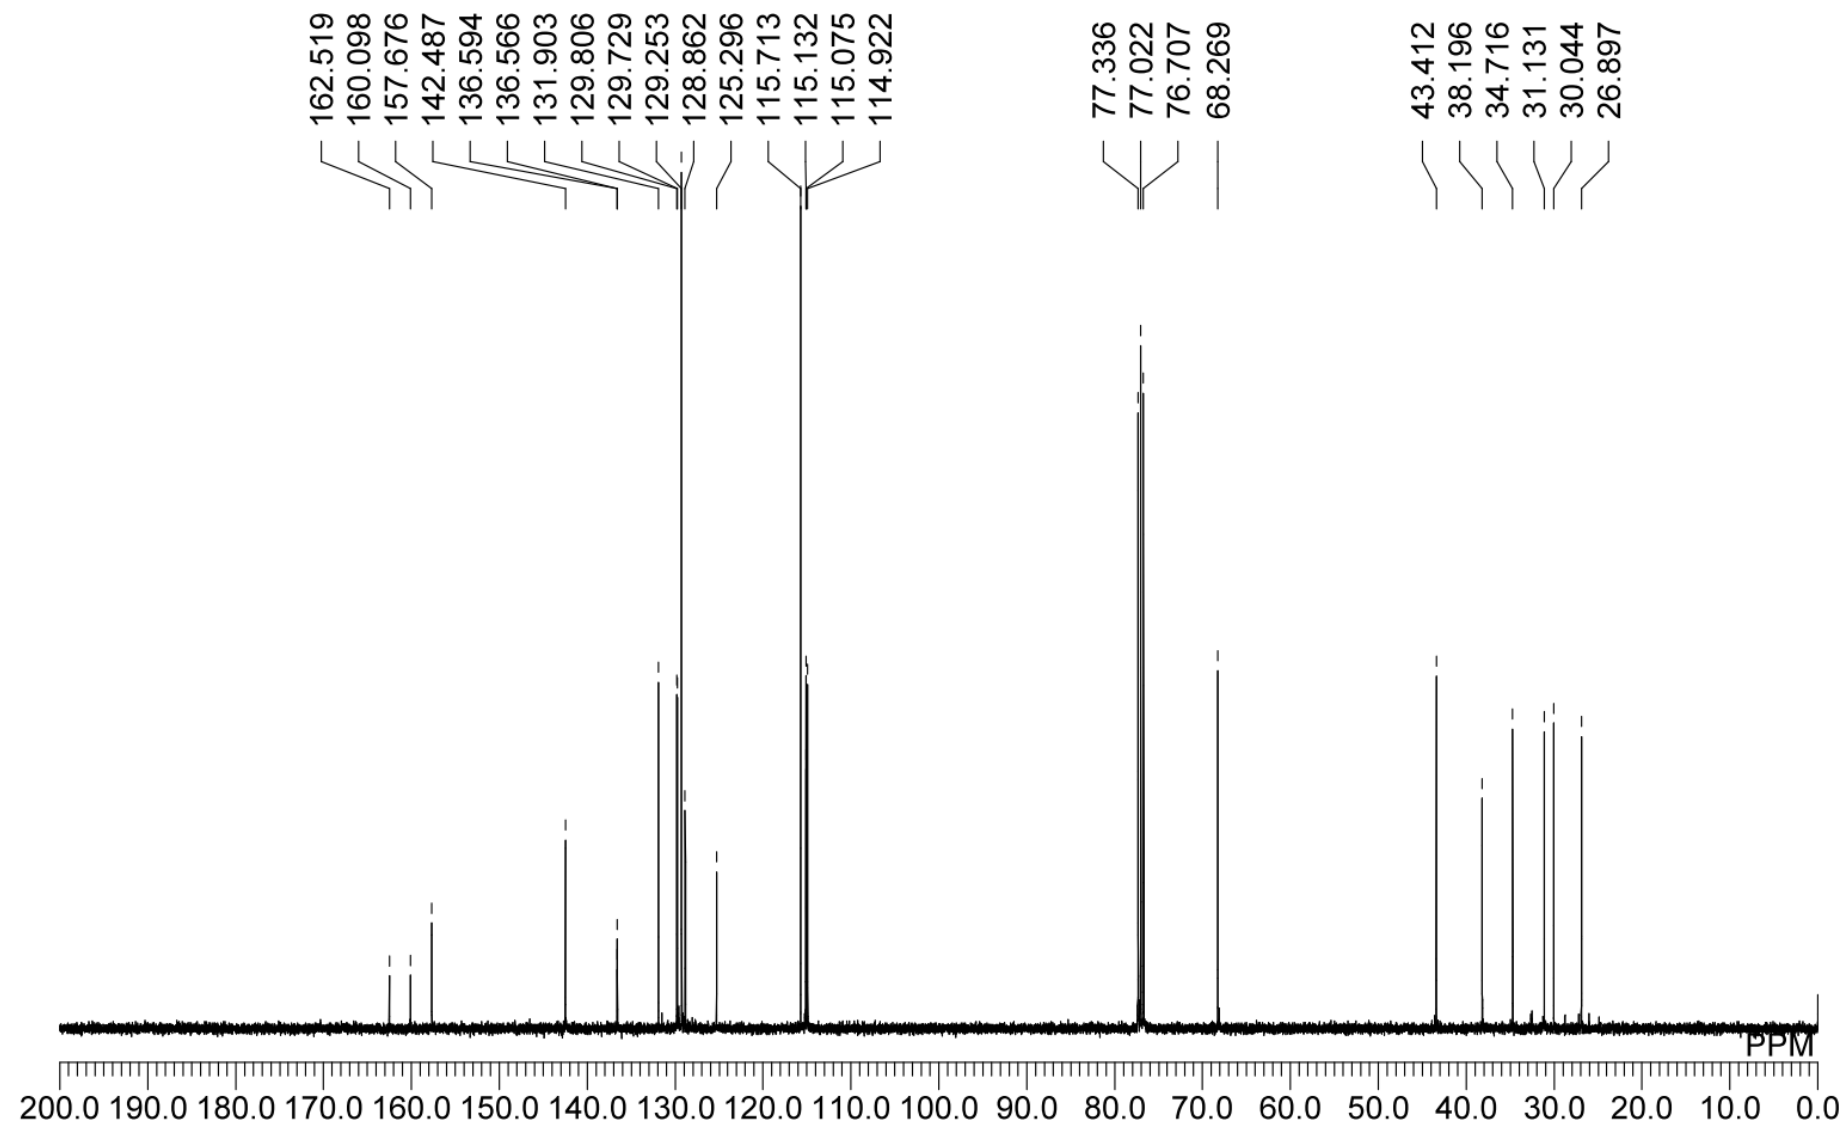

<sup>1</sup>H NMR of 3ga

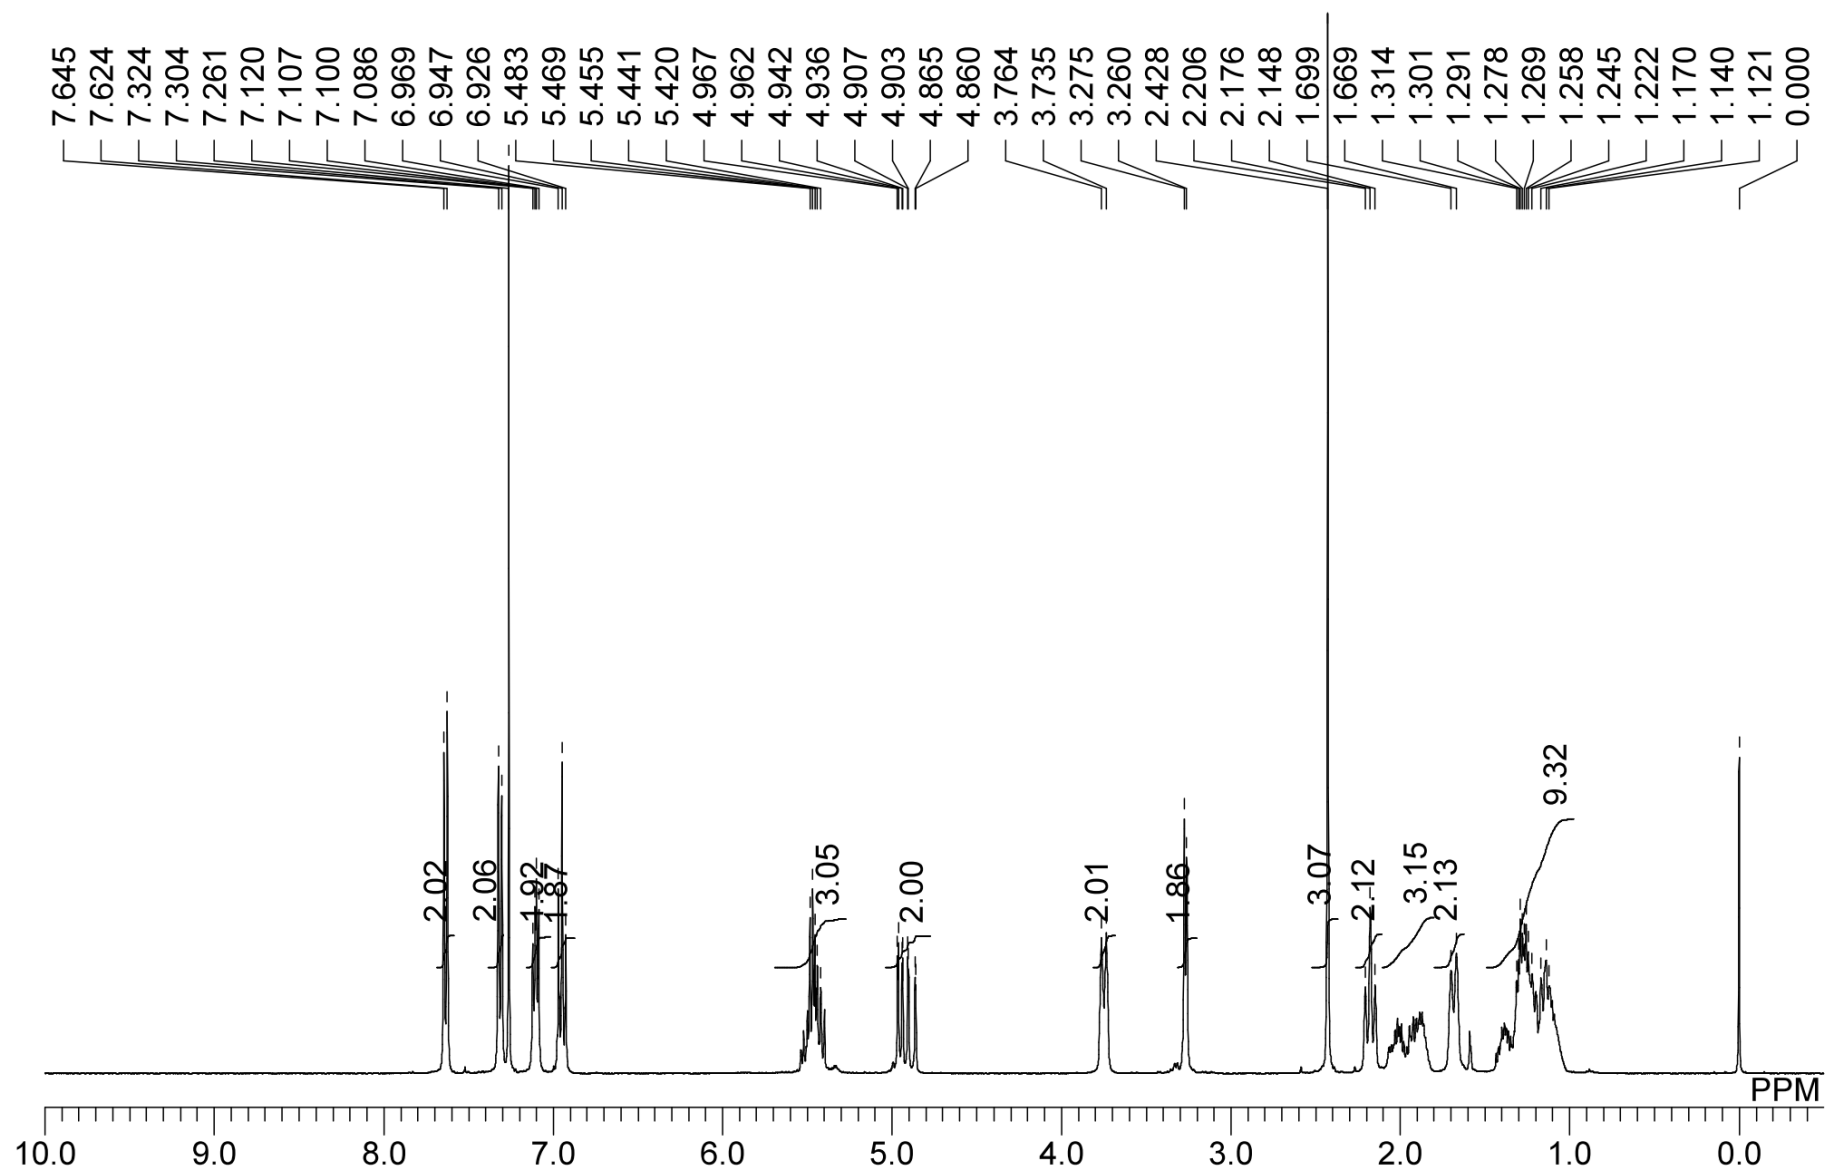

$^{13}\text{C}\{^1\text{H}\}$  NMR of **3ga**

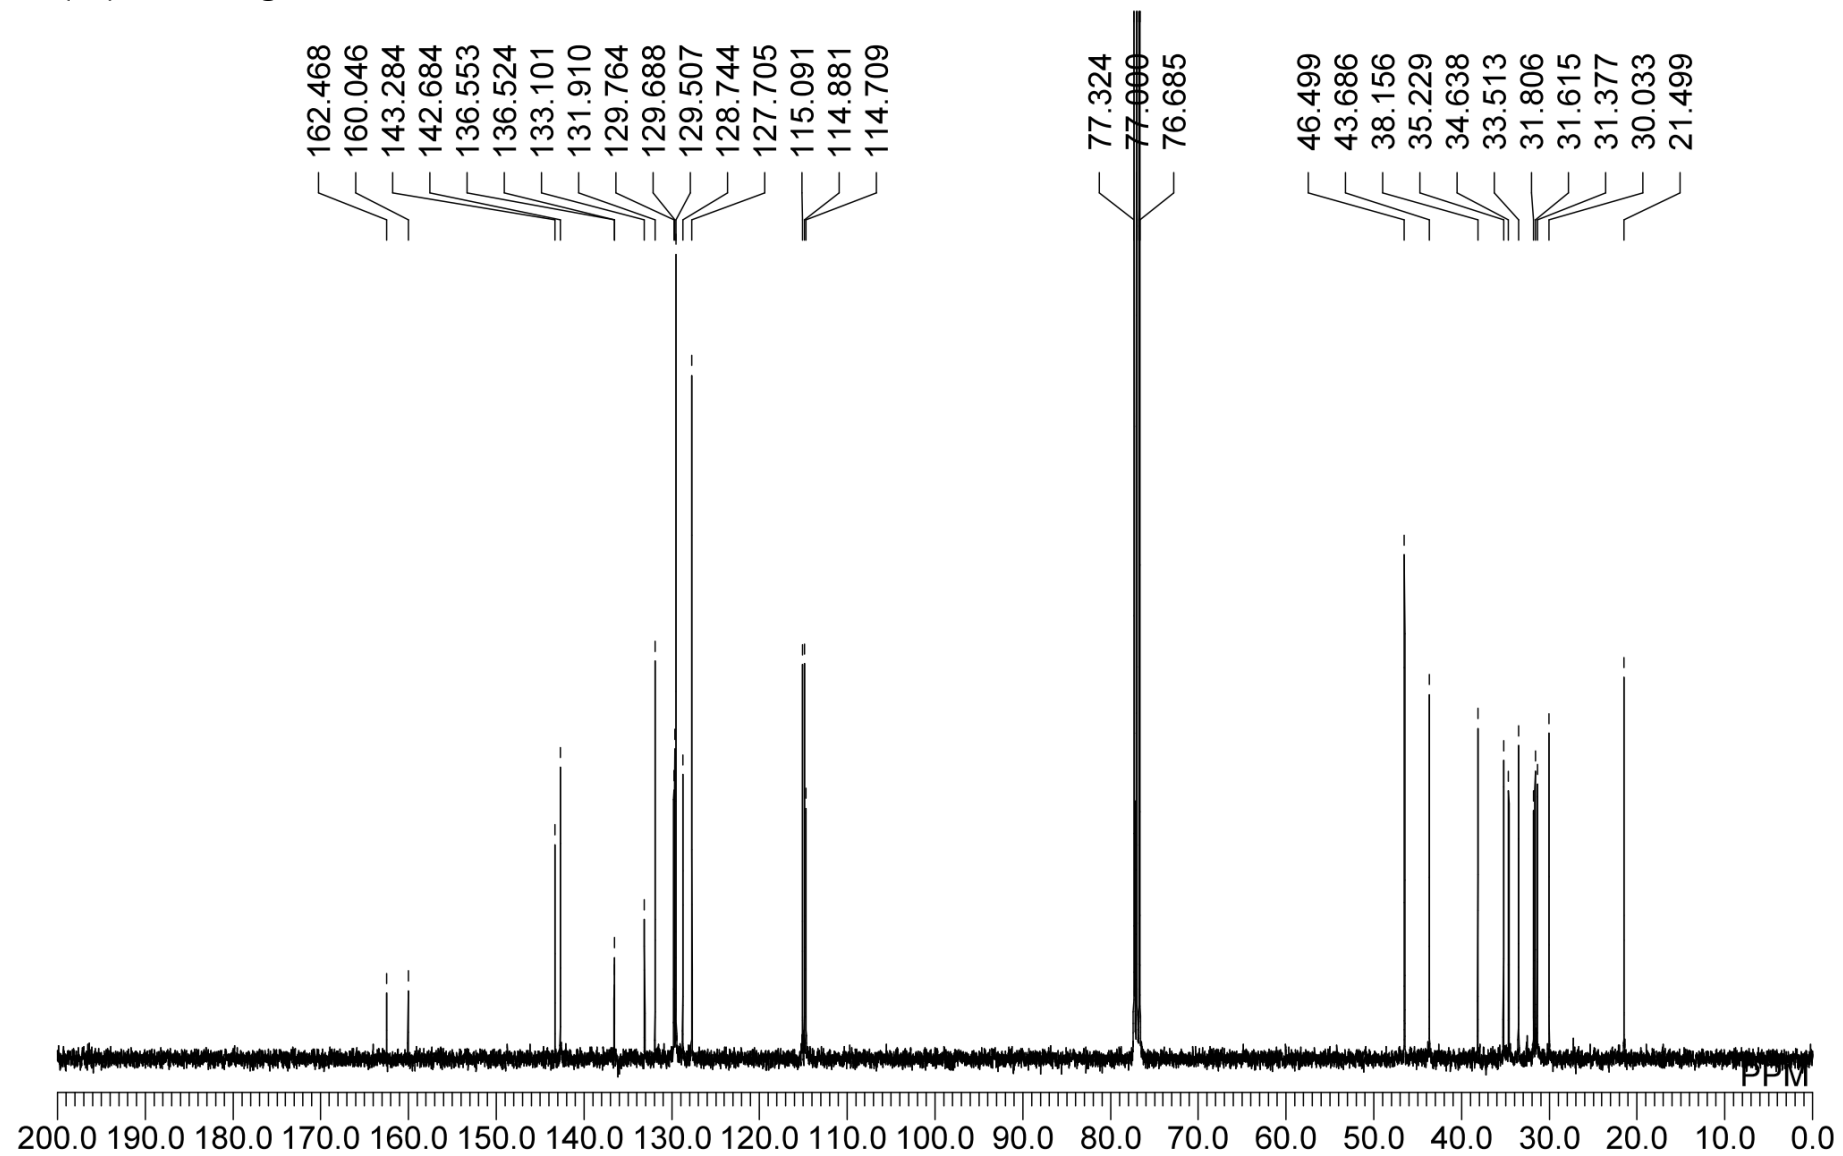



<sup>1</sup>H NMR of 3ha

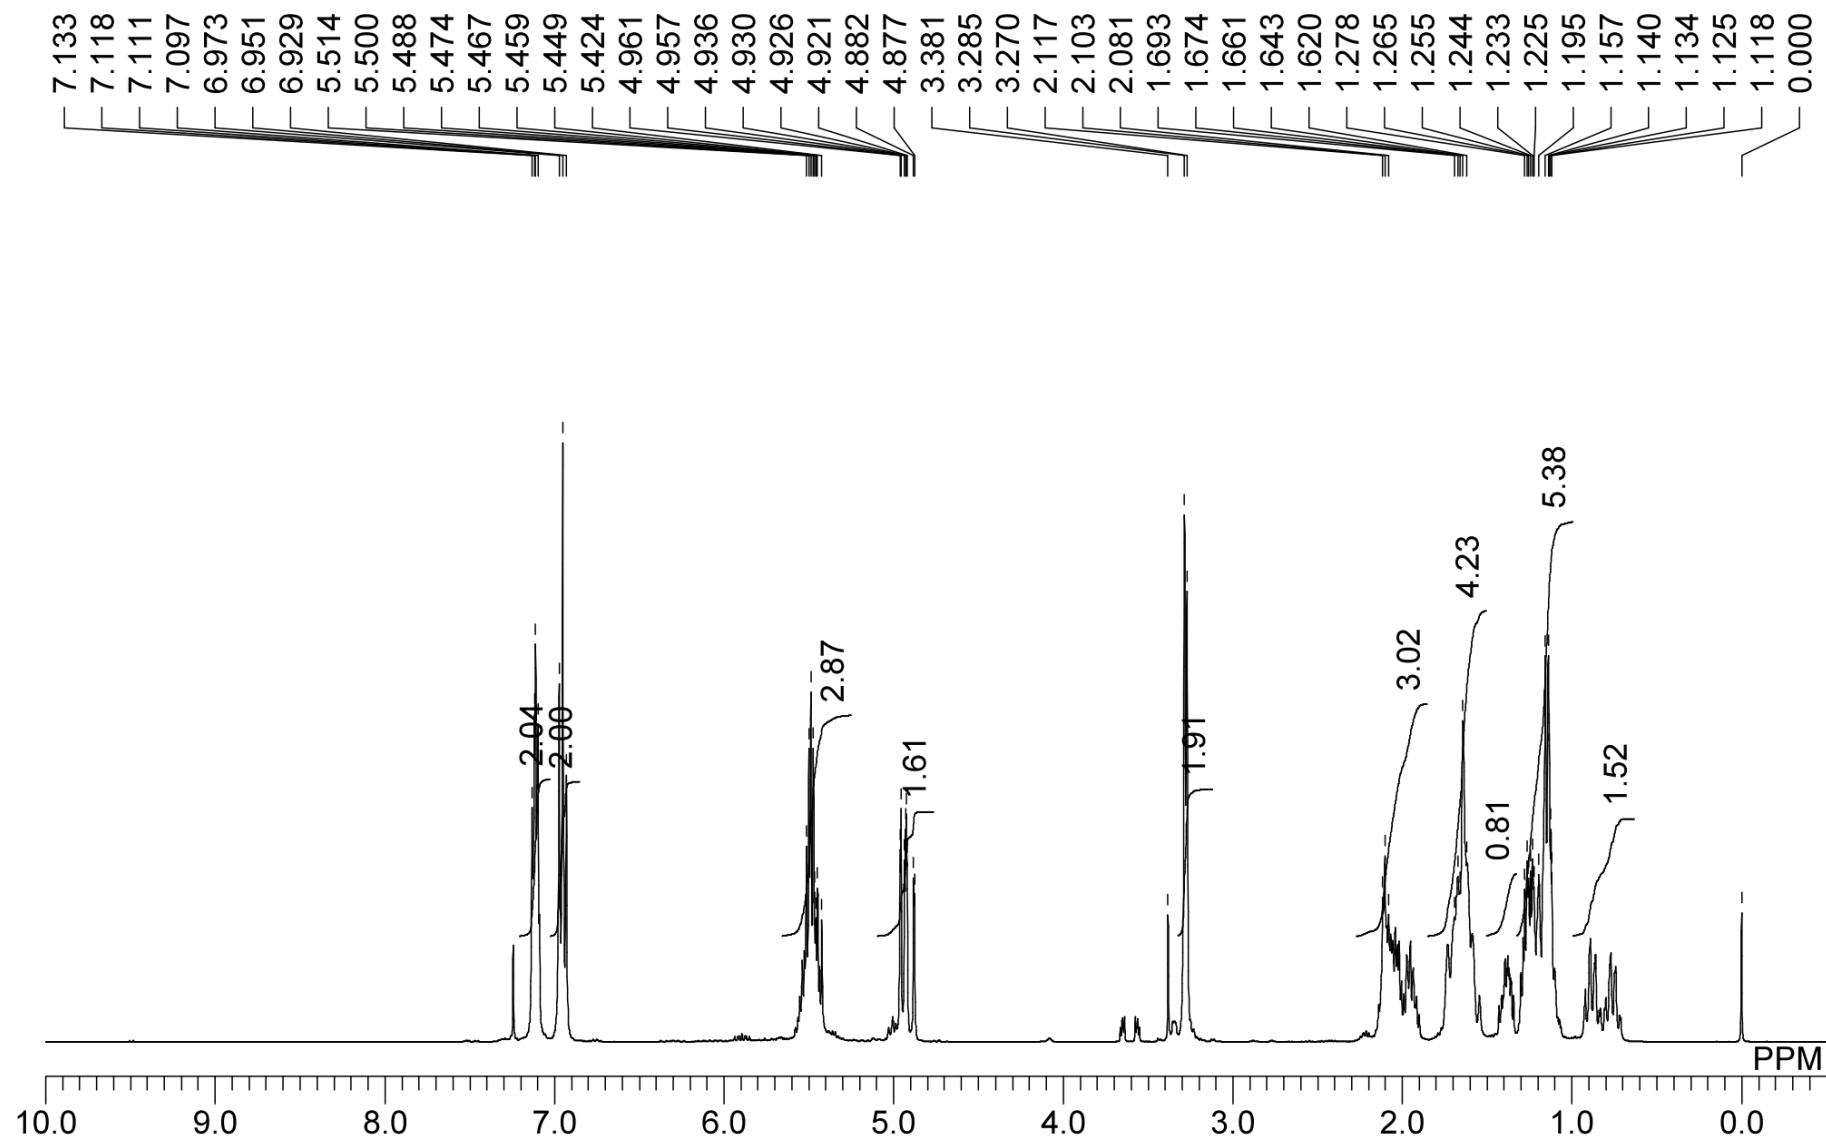

$^{13}\text{C}\{^1\text{H}\}$  NMR of **3ha**

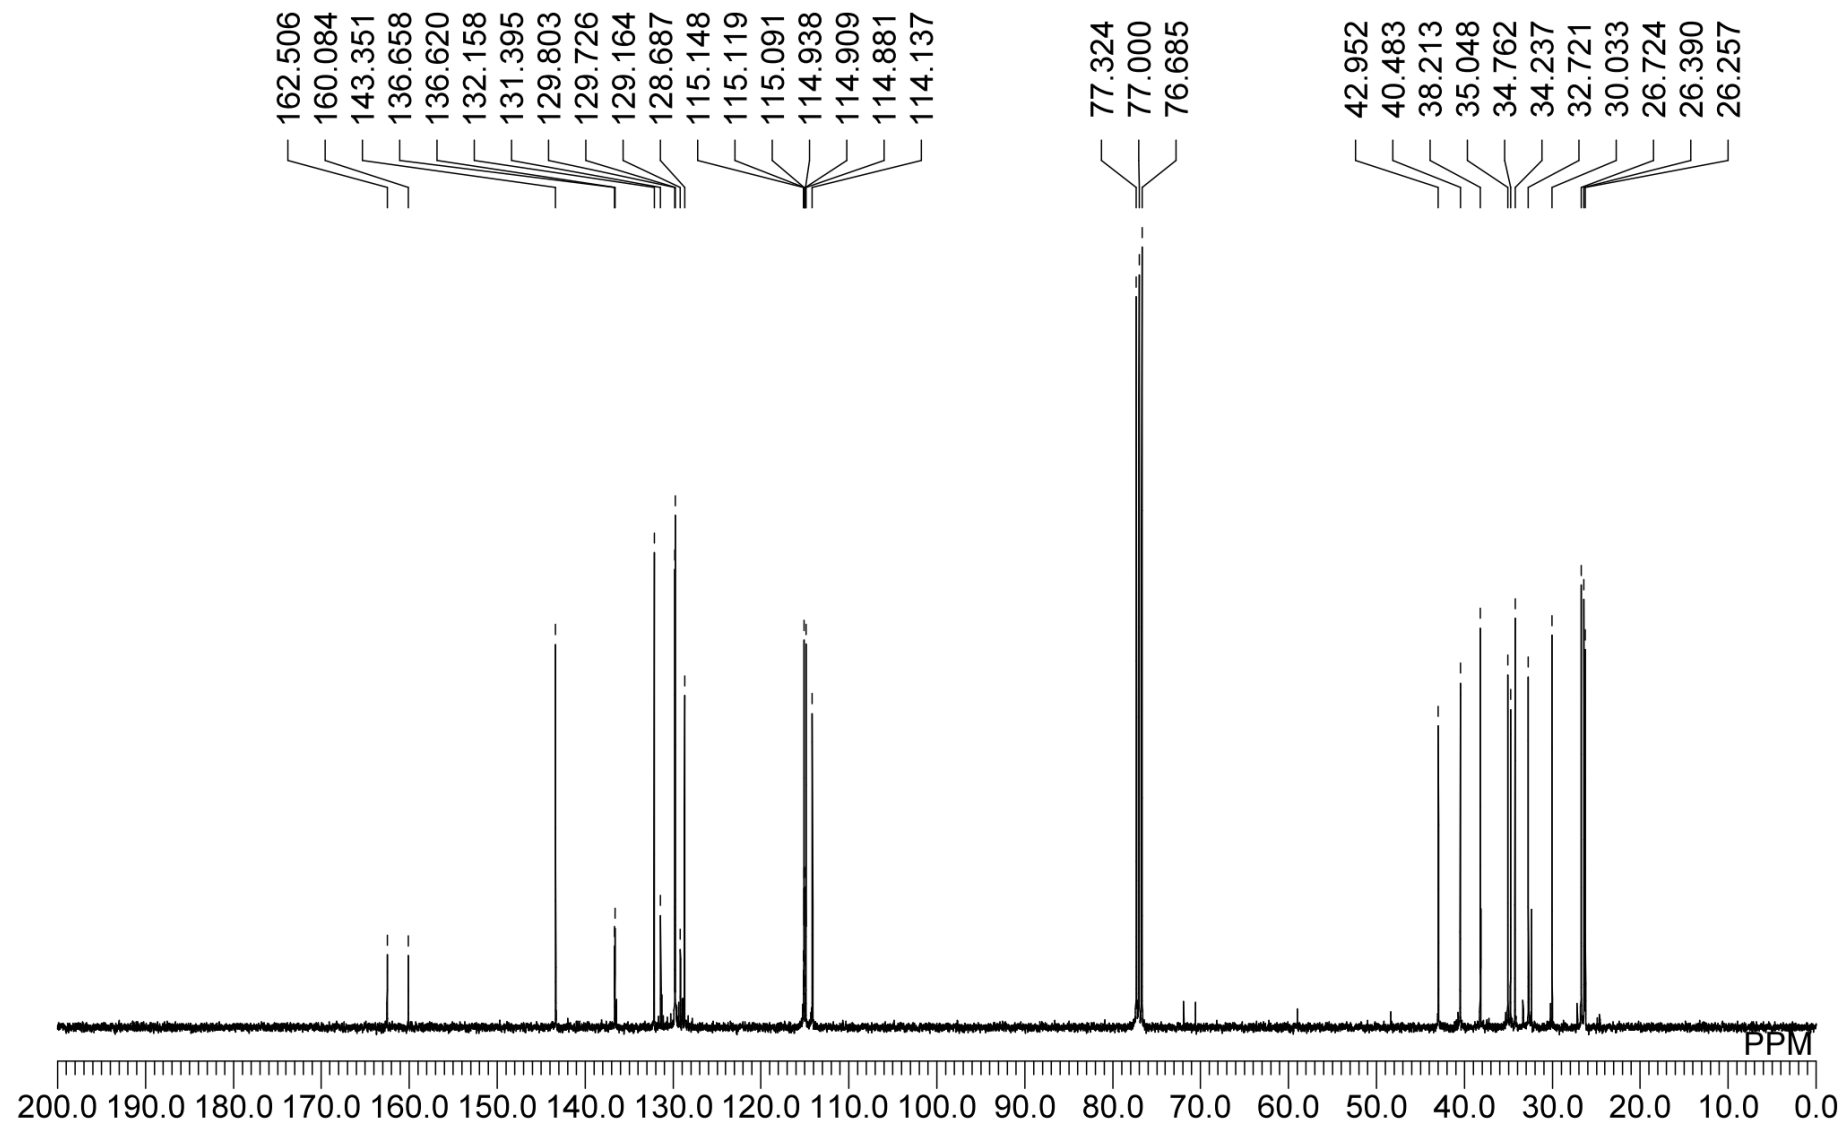

<sup>1</sup>H NMR of **3ab**

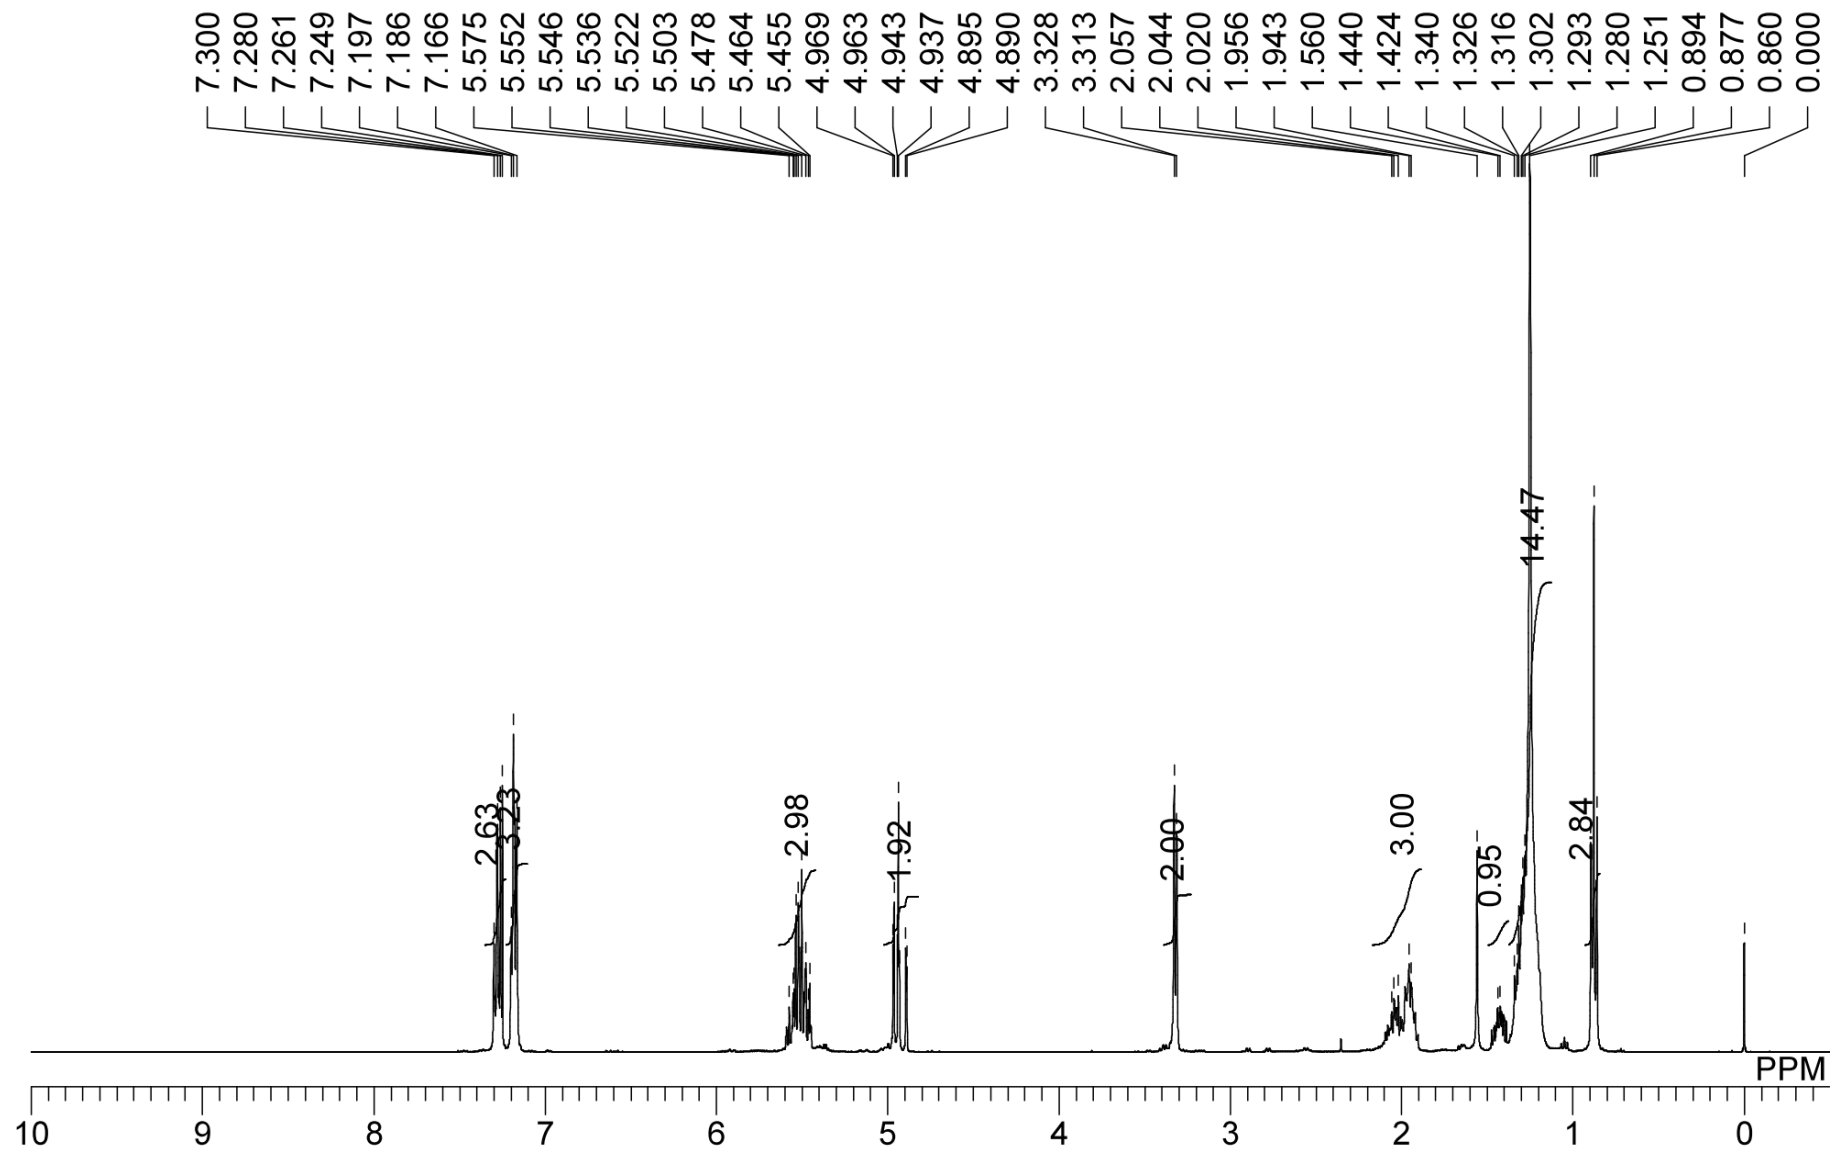

$^{13}\text{C}\{^1\text{H}\}$  NMR of **3ab**

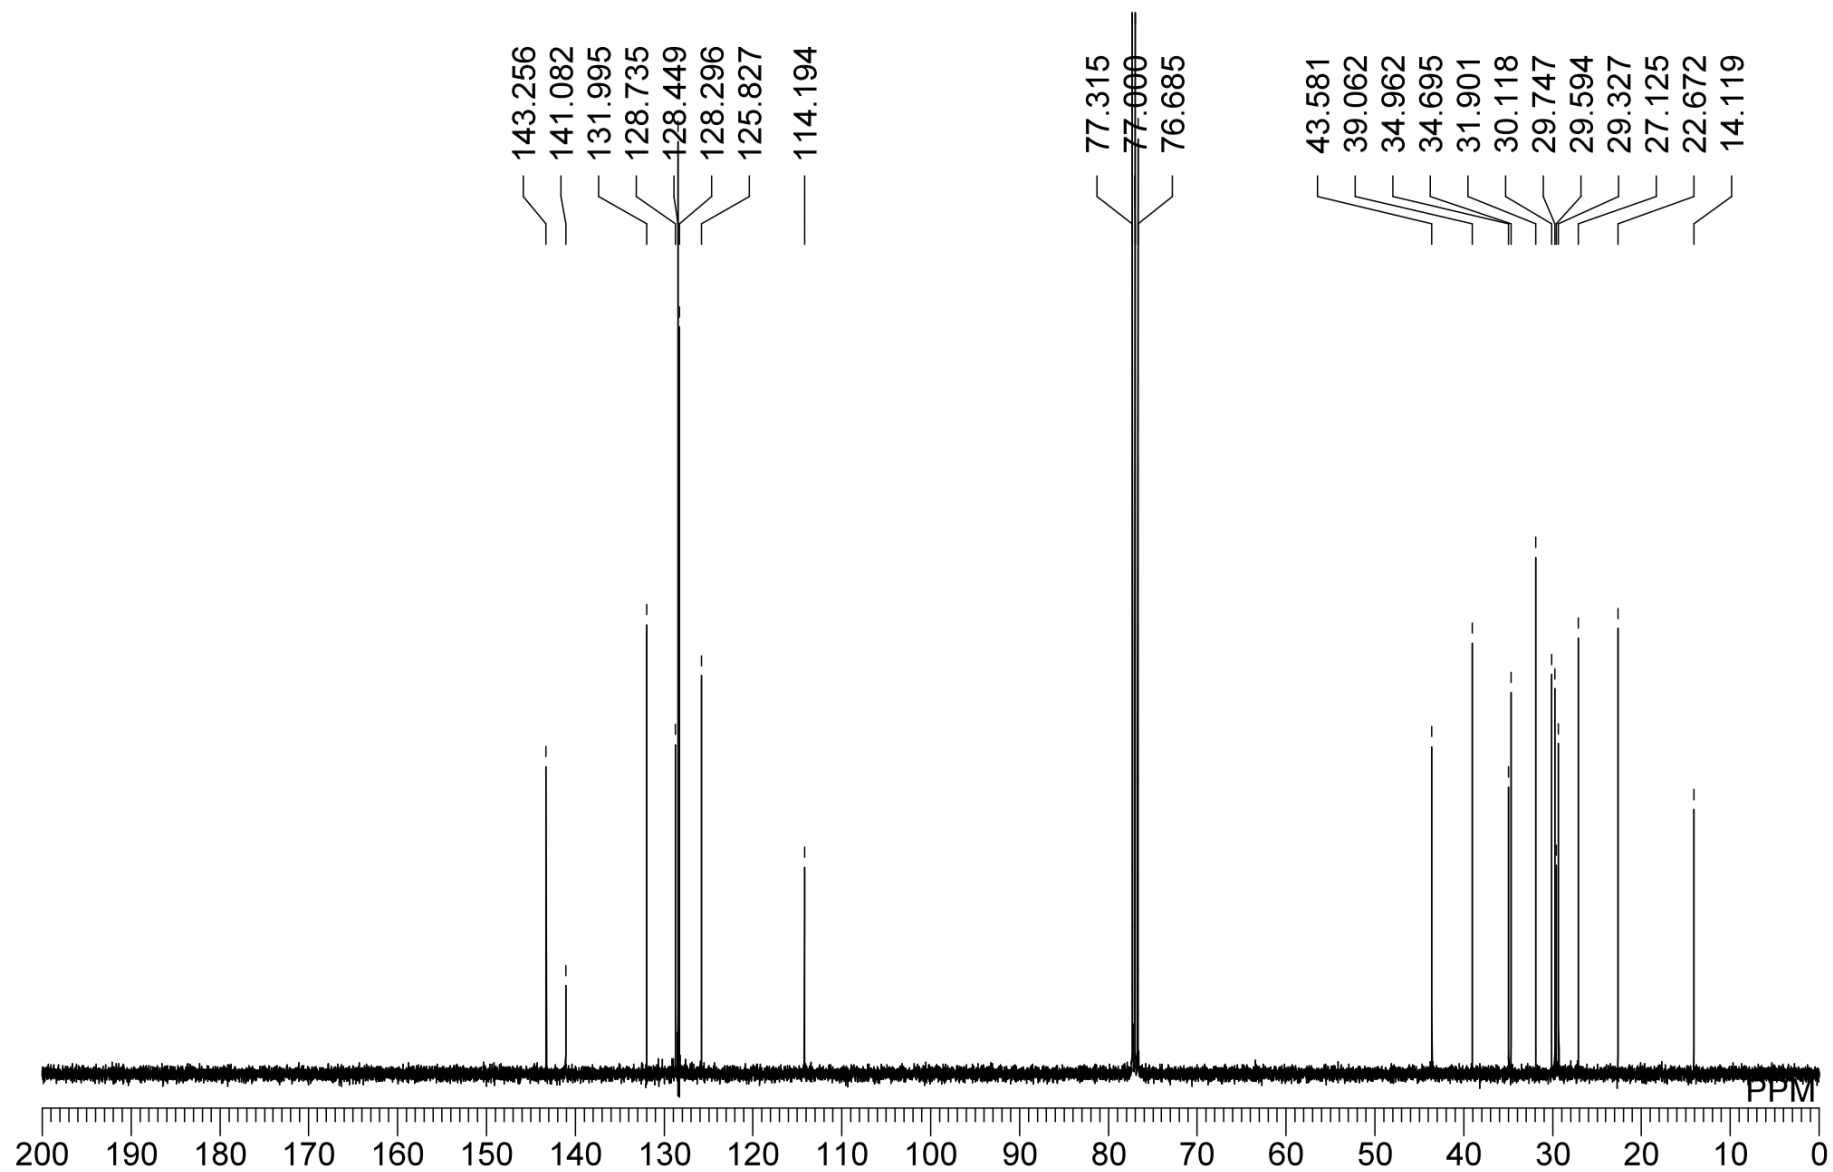

<sup>1</sup>H NMR of **3ac**

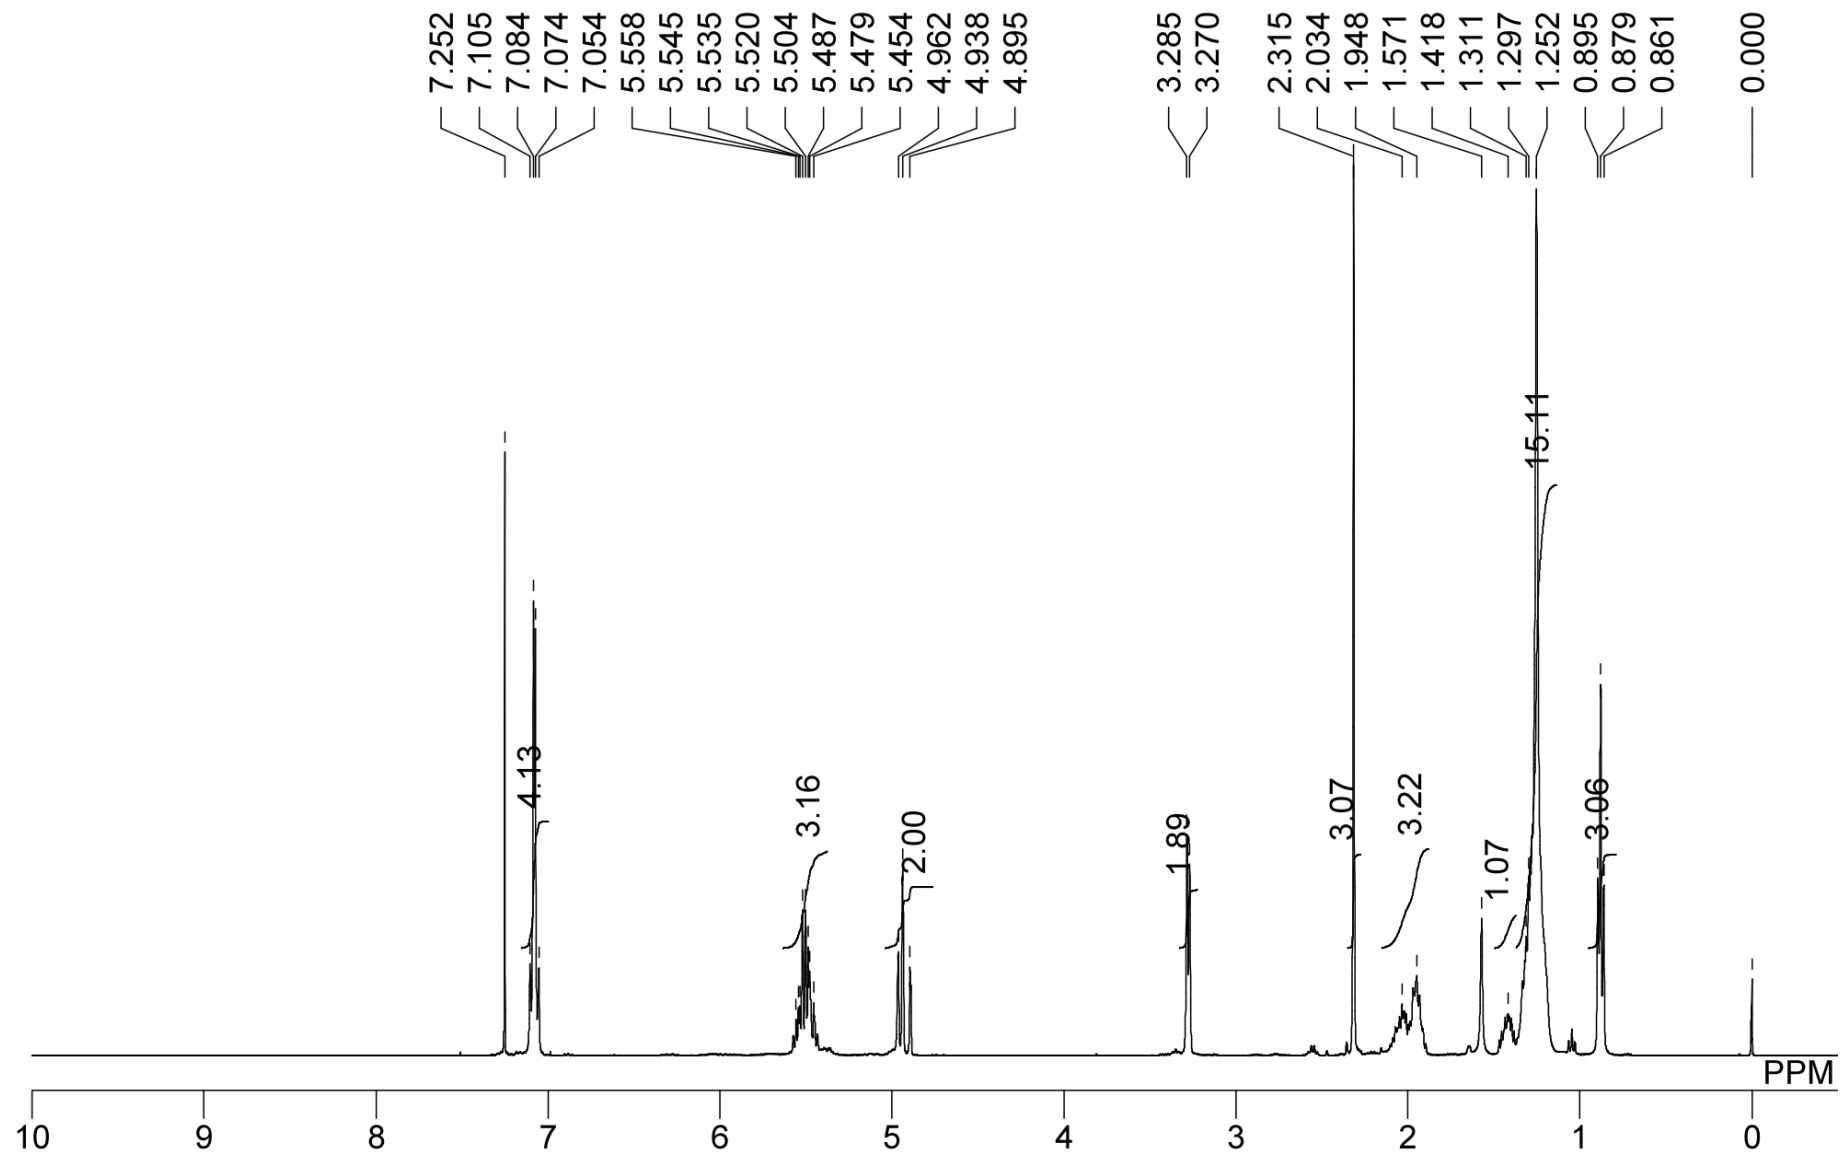

$^{13}\text{C}\{^1\text{H}\}$  NMR of **3ac**

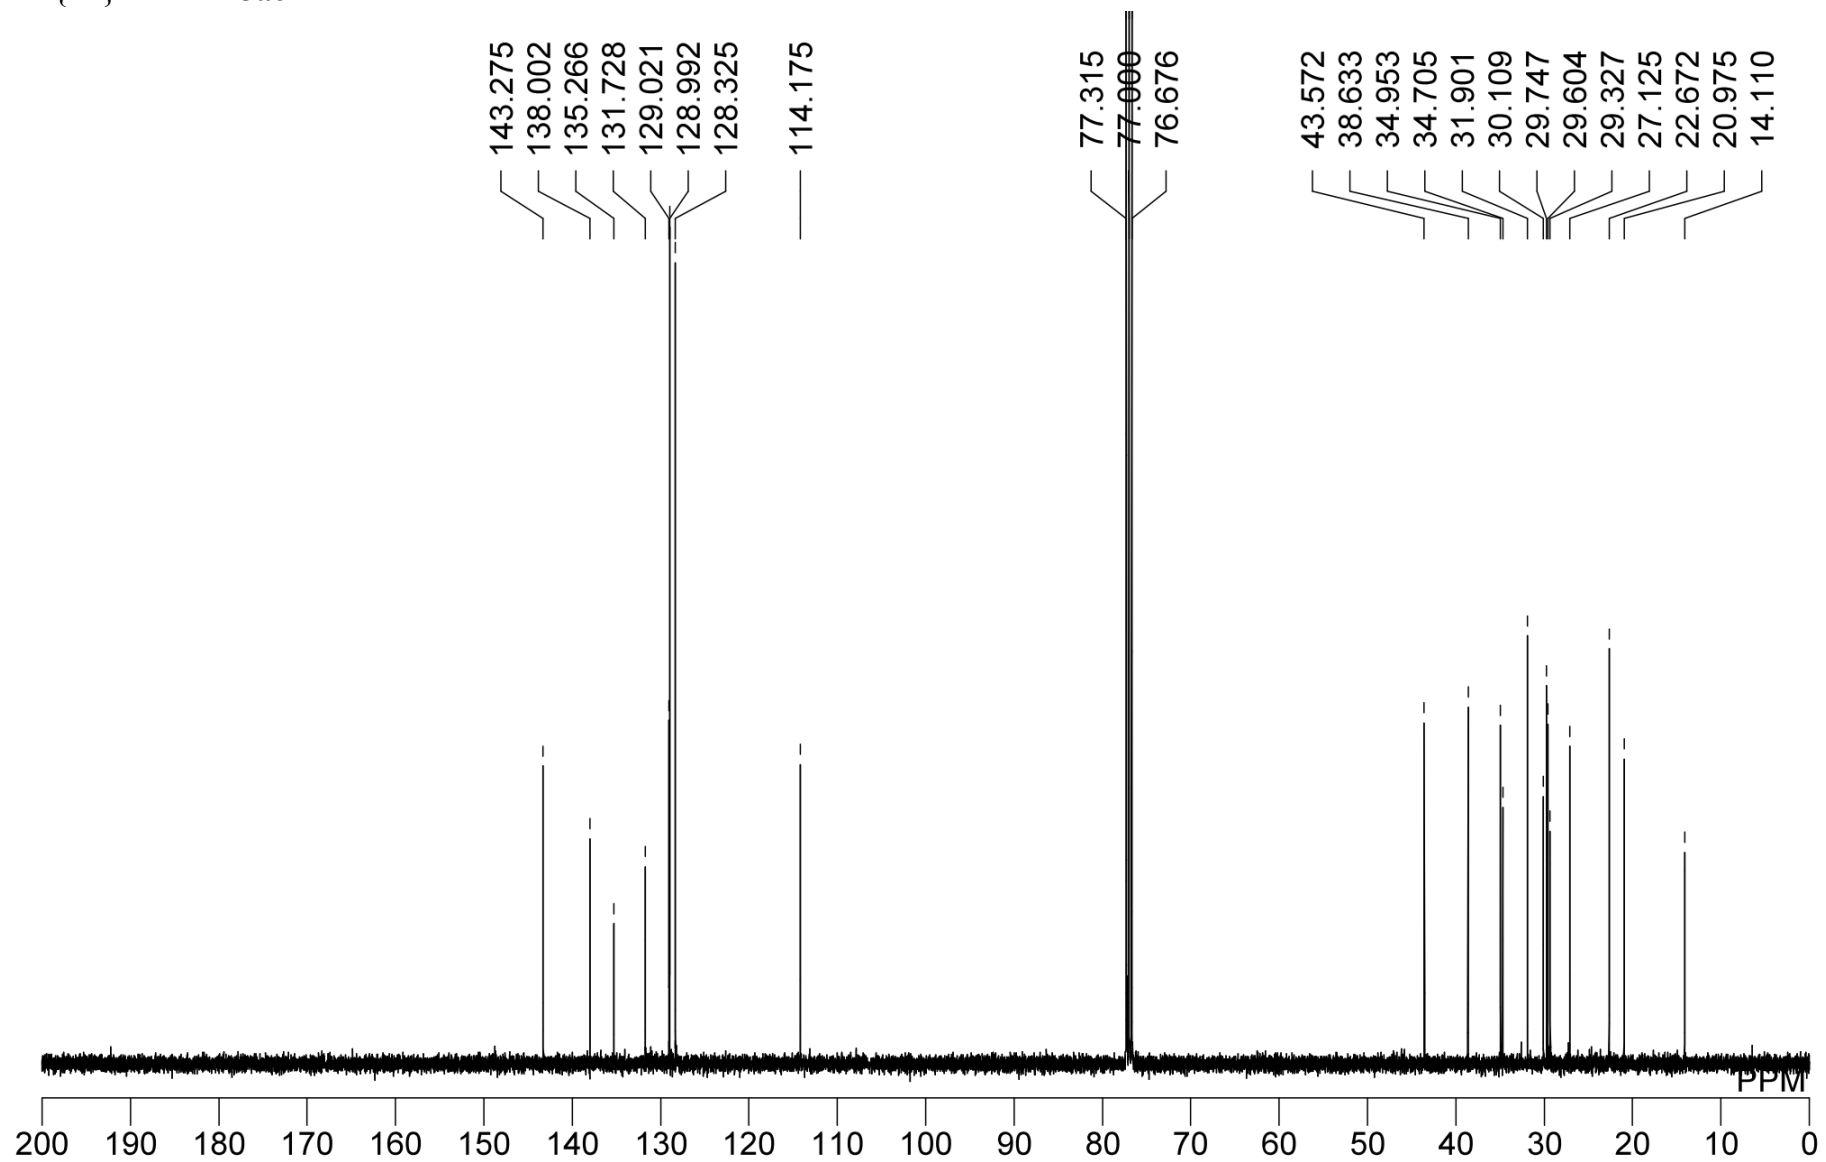

<sup>1</sup>H NMR of **3ad**

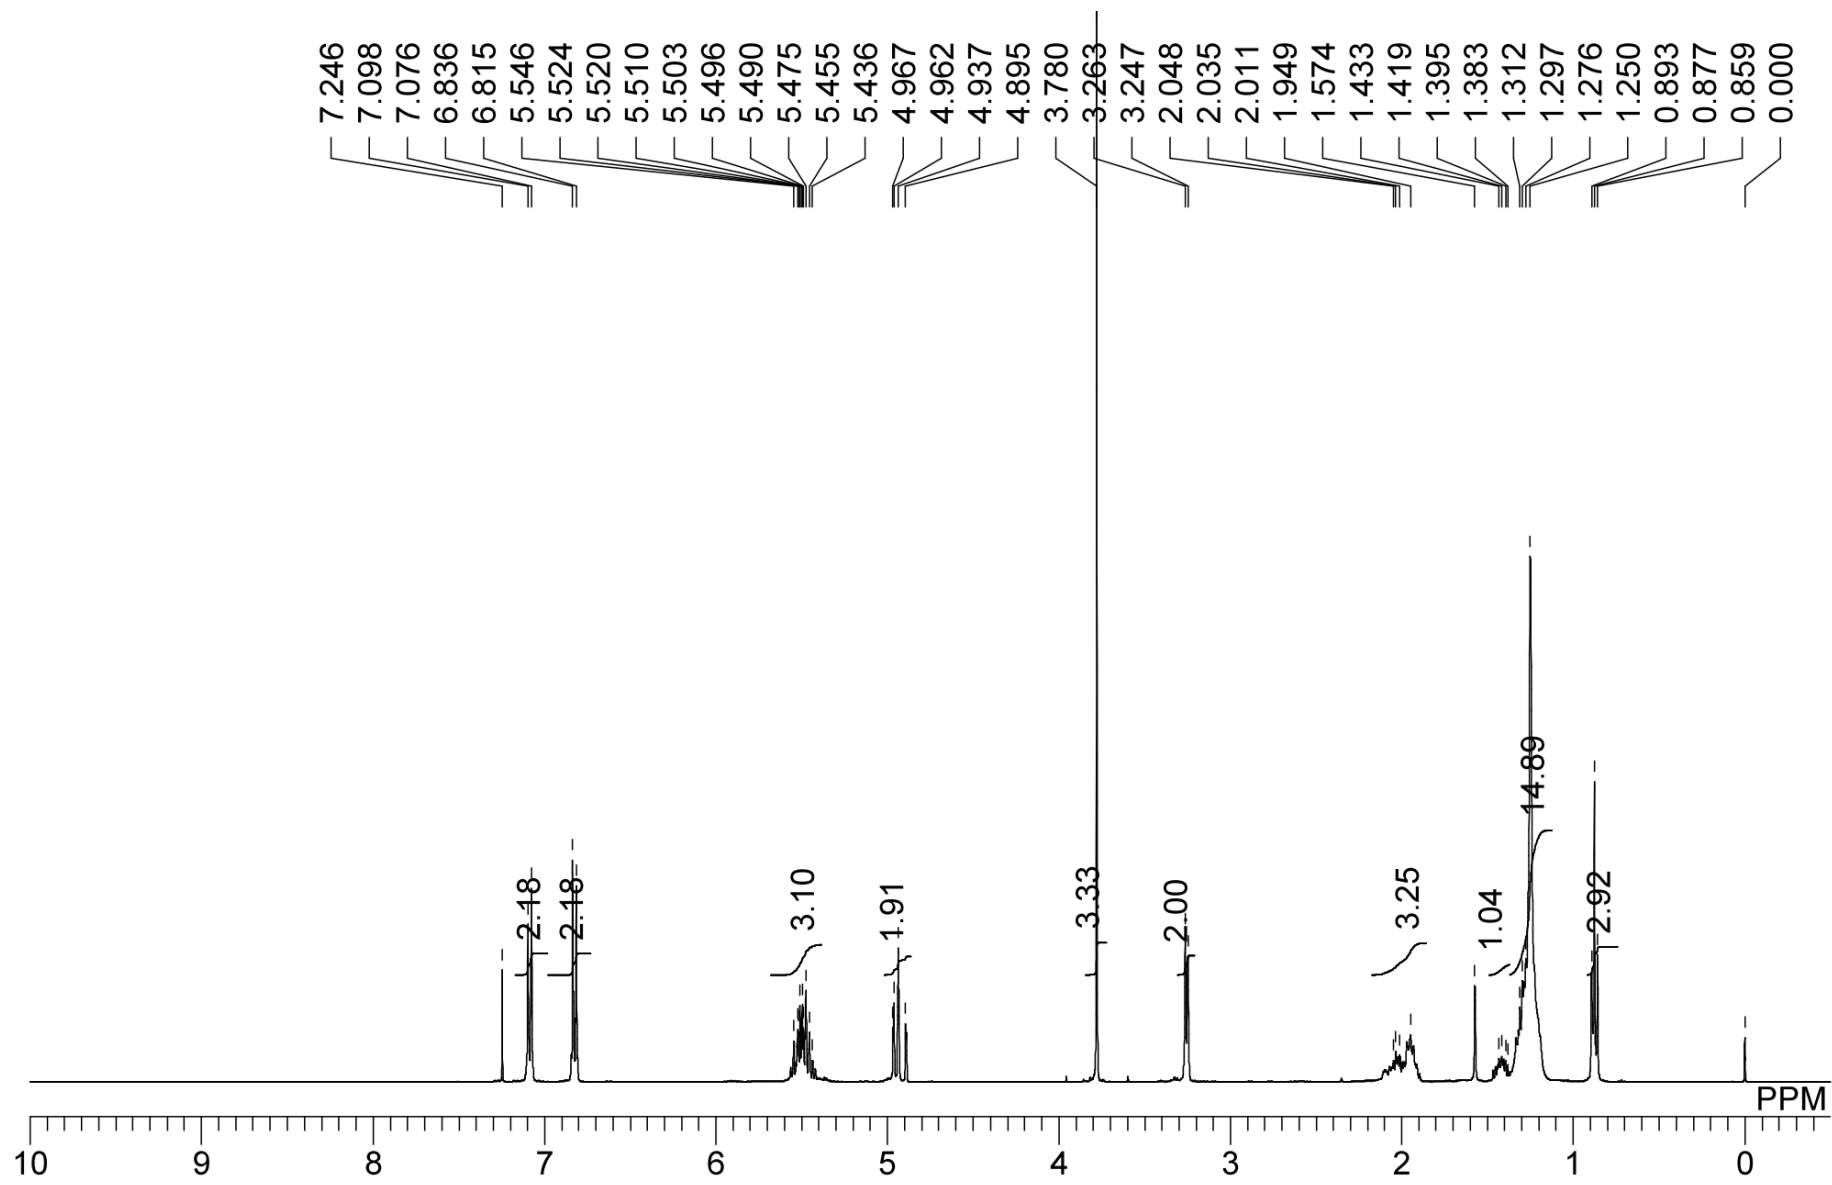

$^{13}\text{C}\{^1\text{H}\}$  NMR of **3ad**

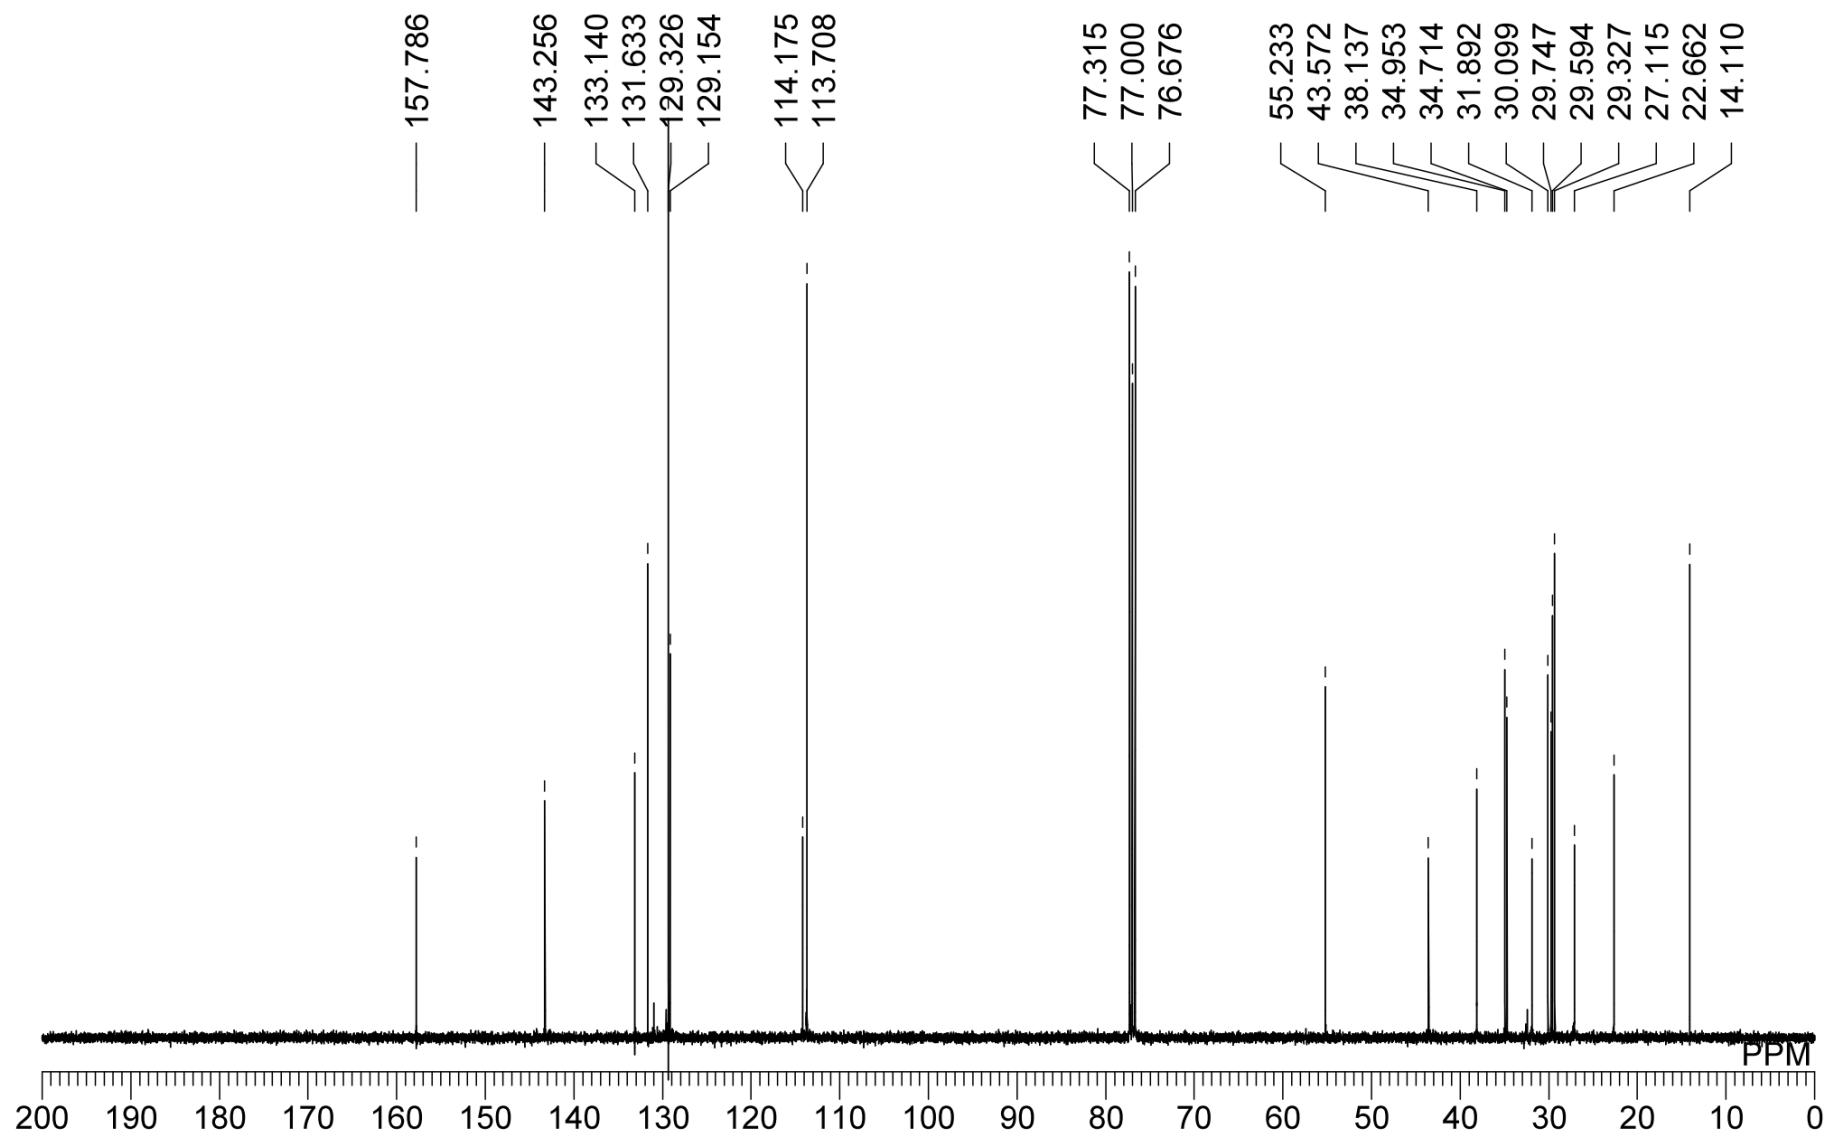



<sup>1</sup>H NMR of 3ae

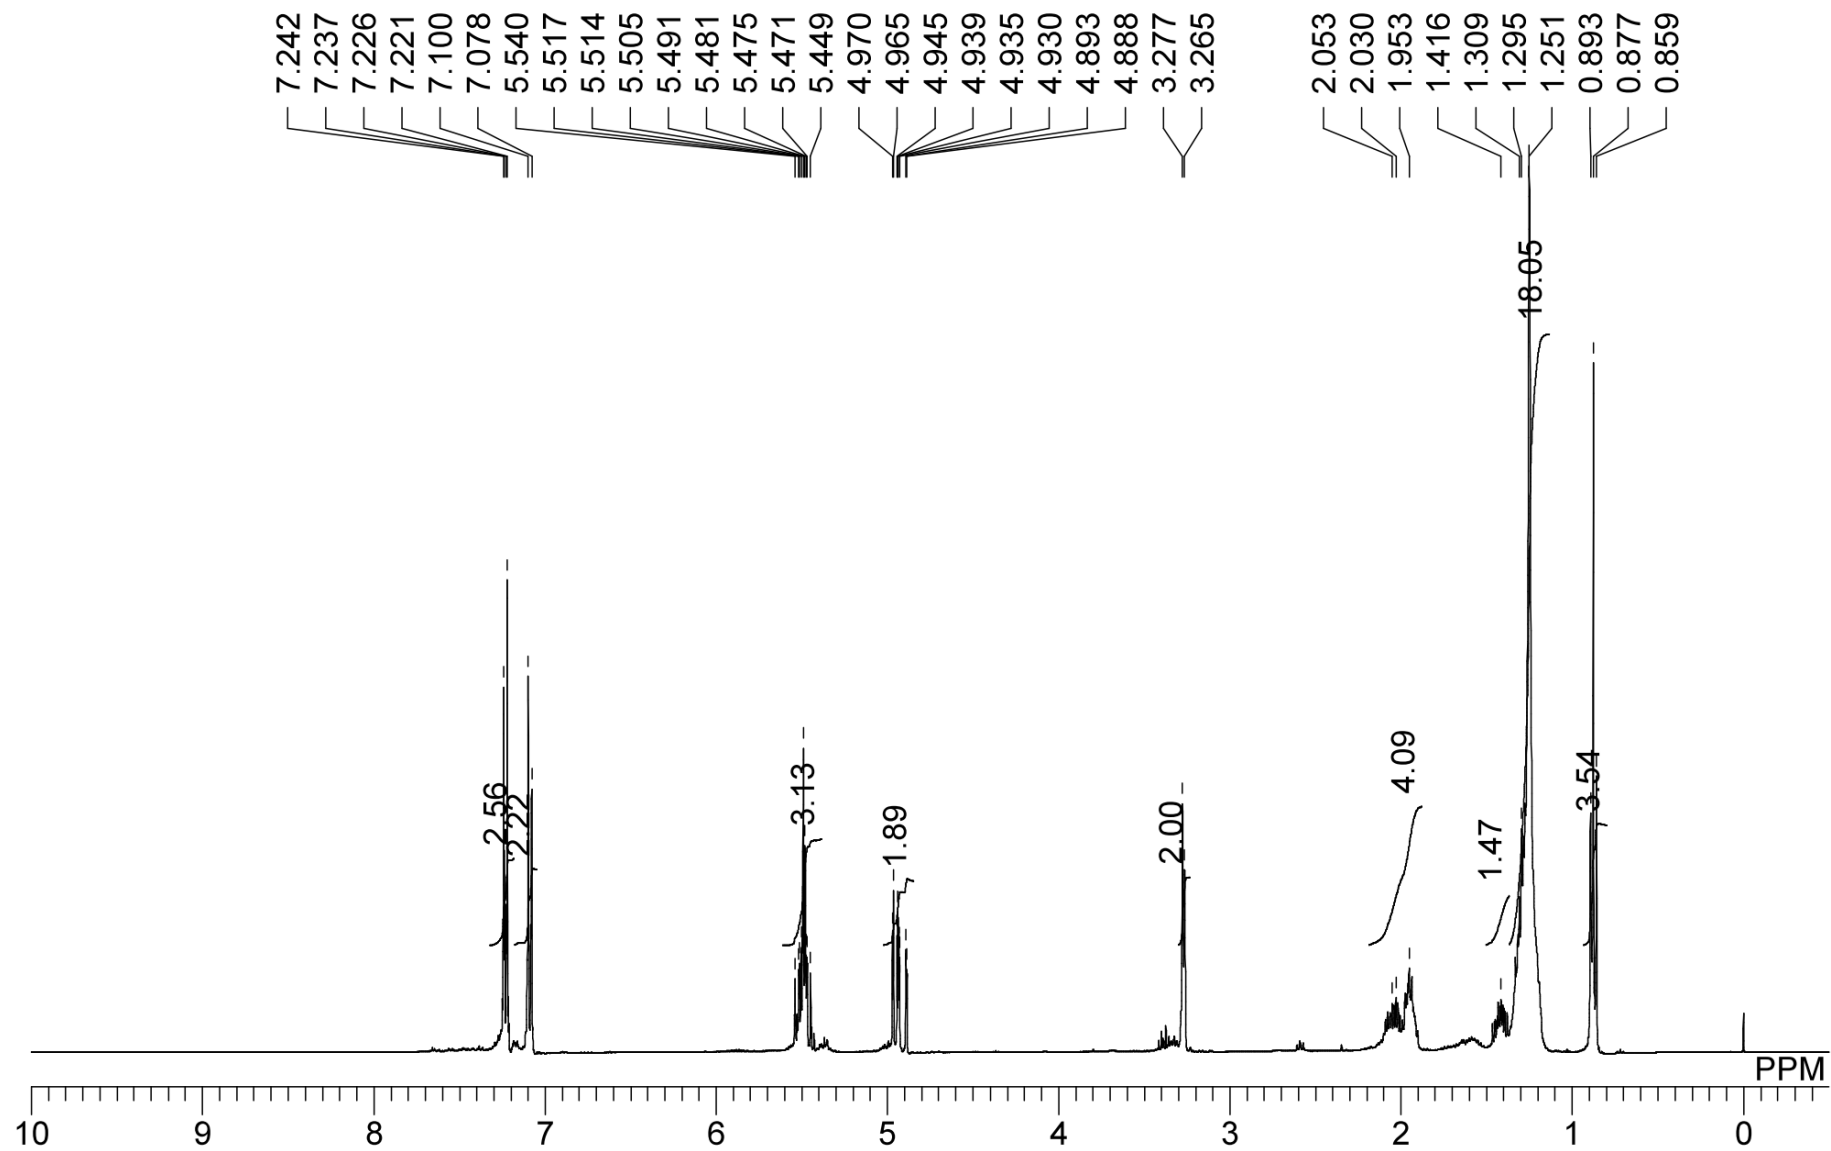

$^{13}\text{C}\{^1\text{H}\}$  NMR of **3ae**

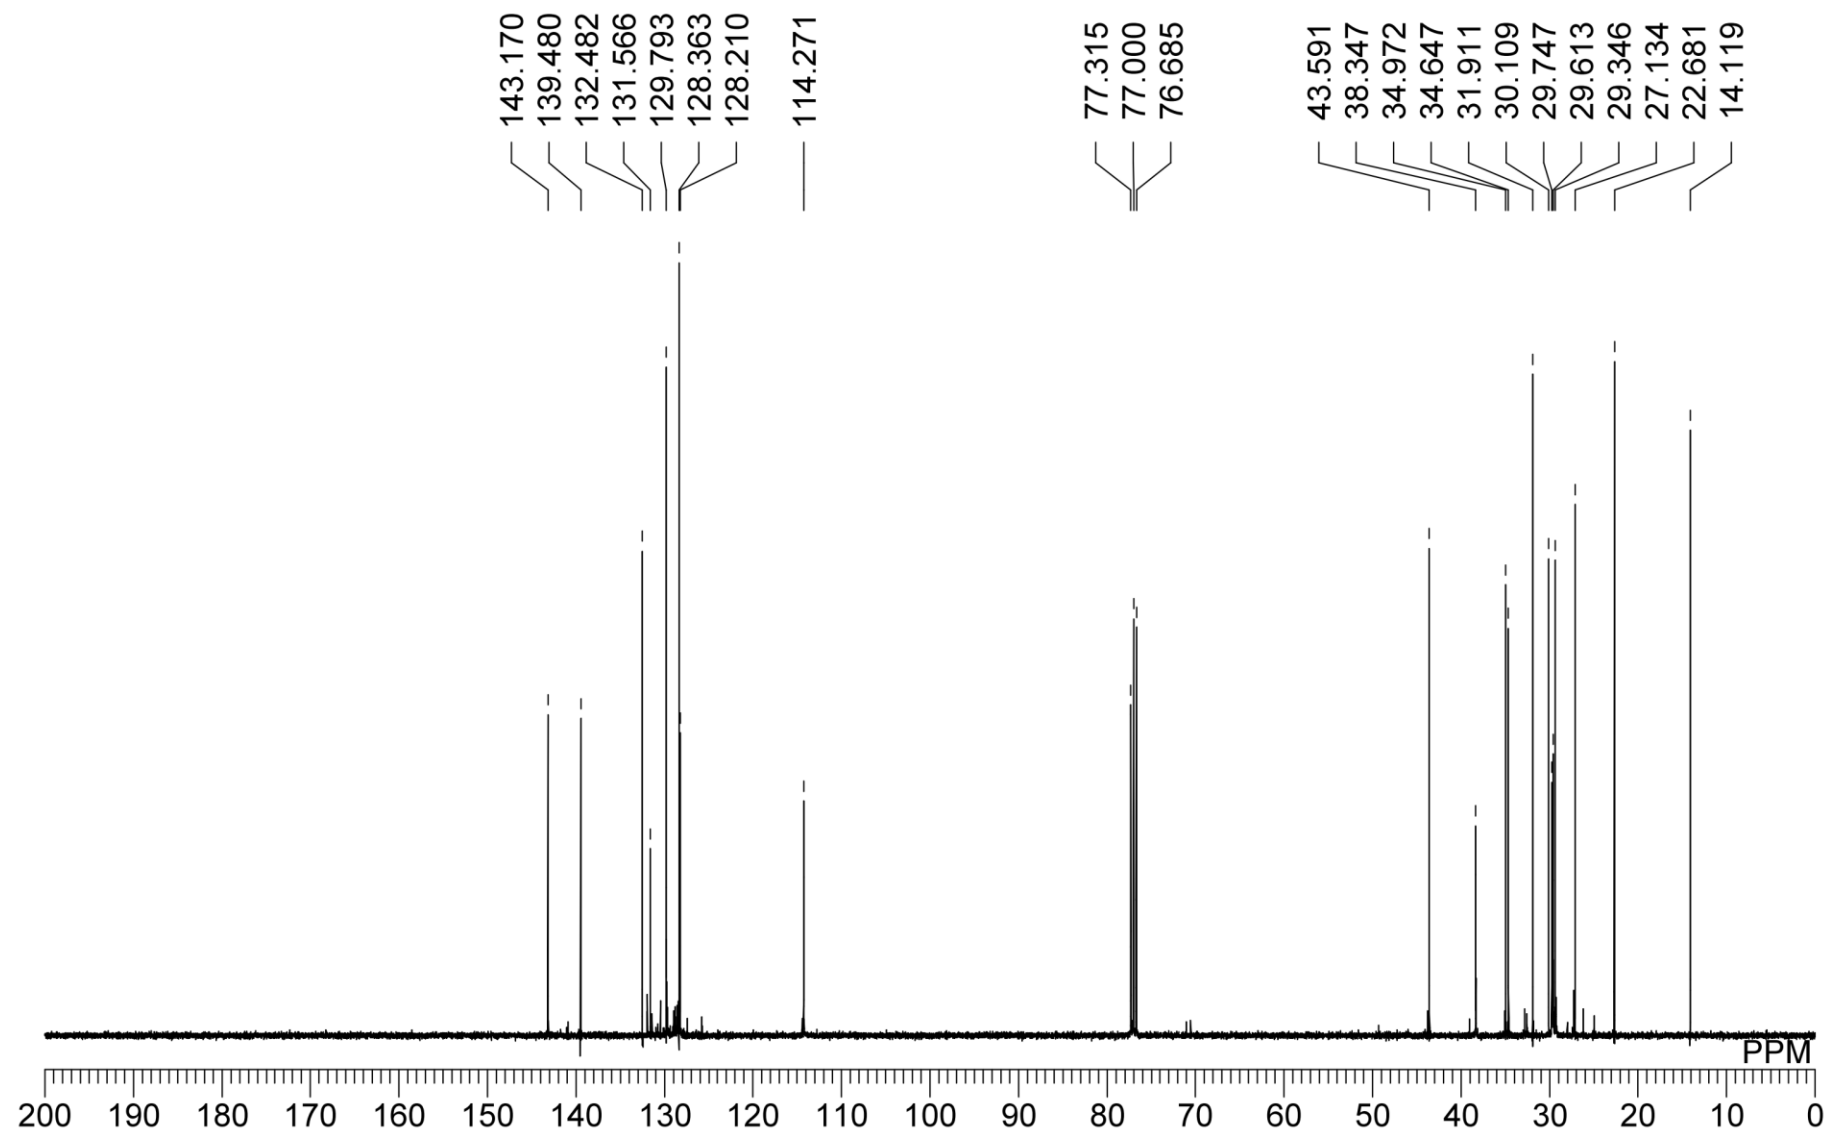

<sup>1</sup>H NMR of **3af**

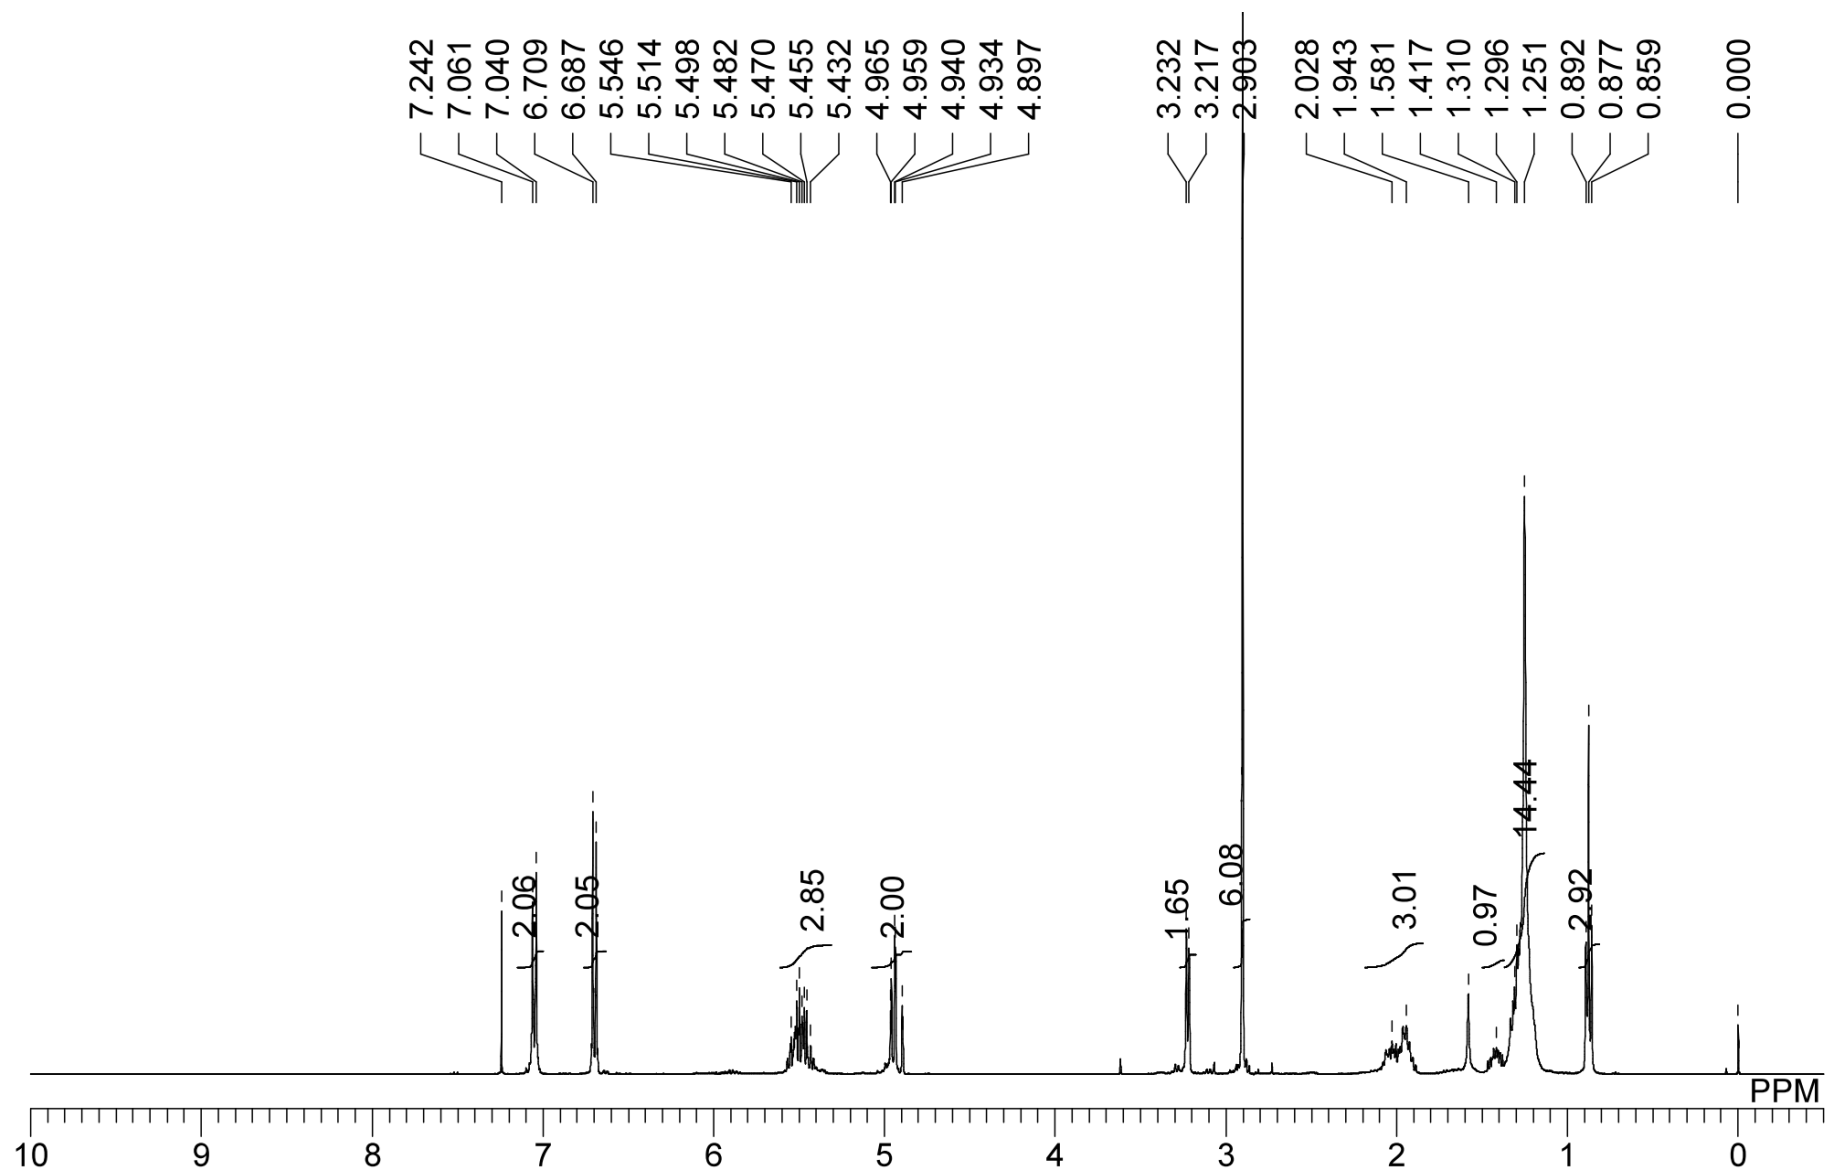

$^{13}\text{C}\{^1\text{H}\}$  NMR of **3af**

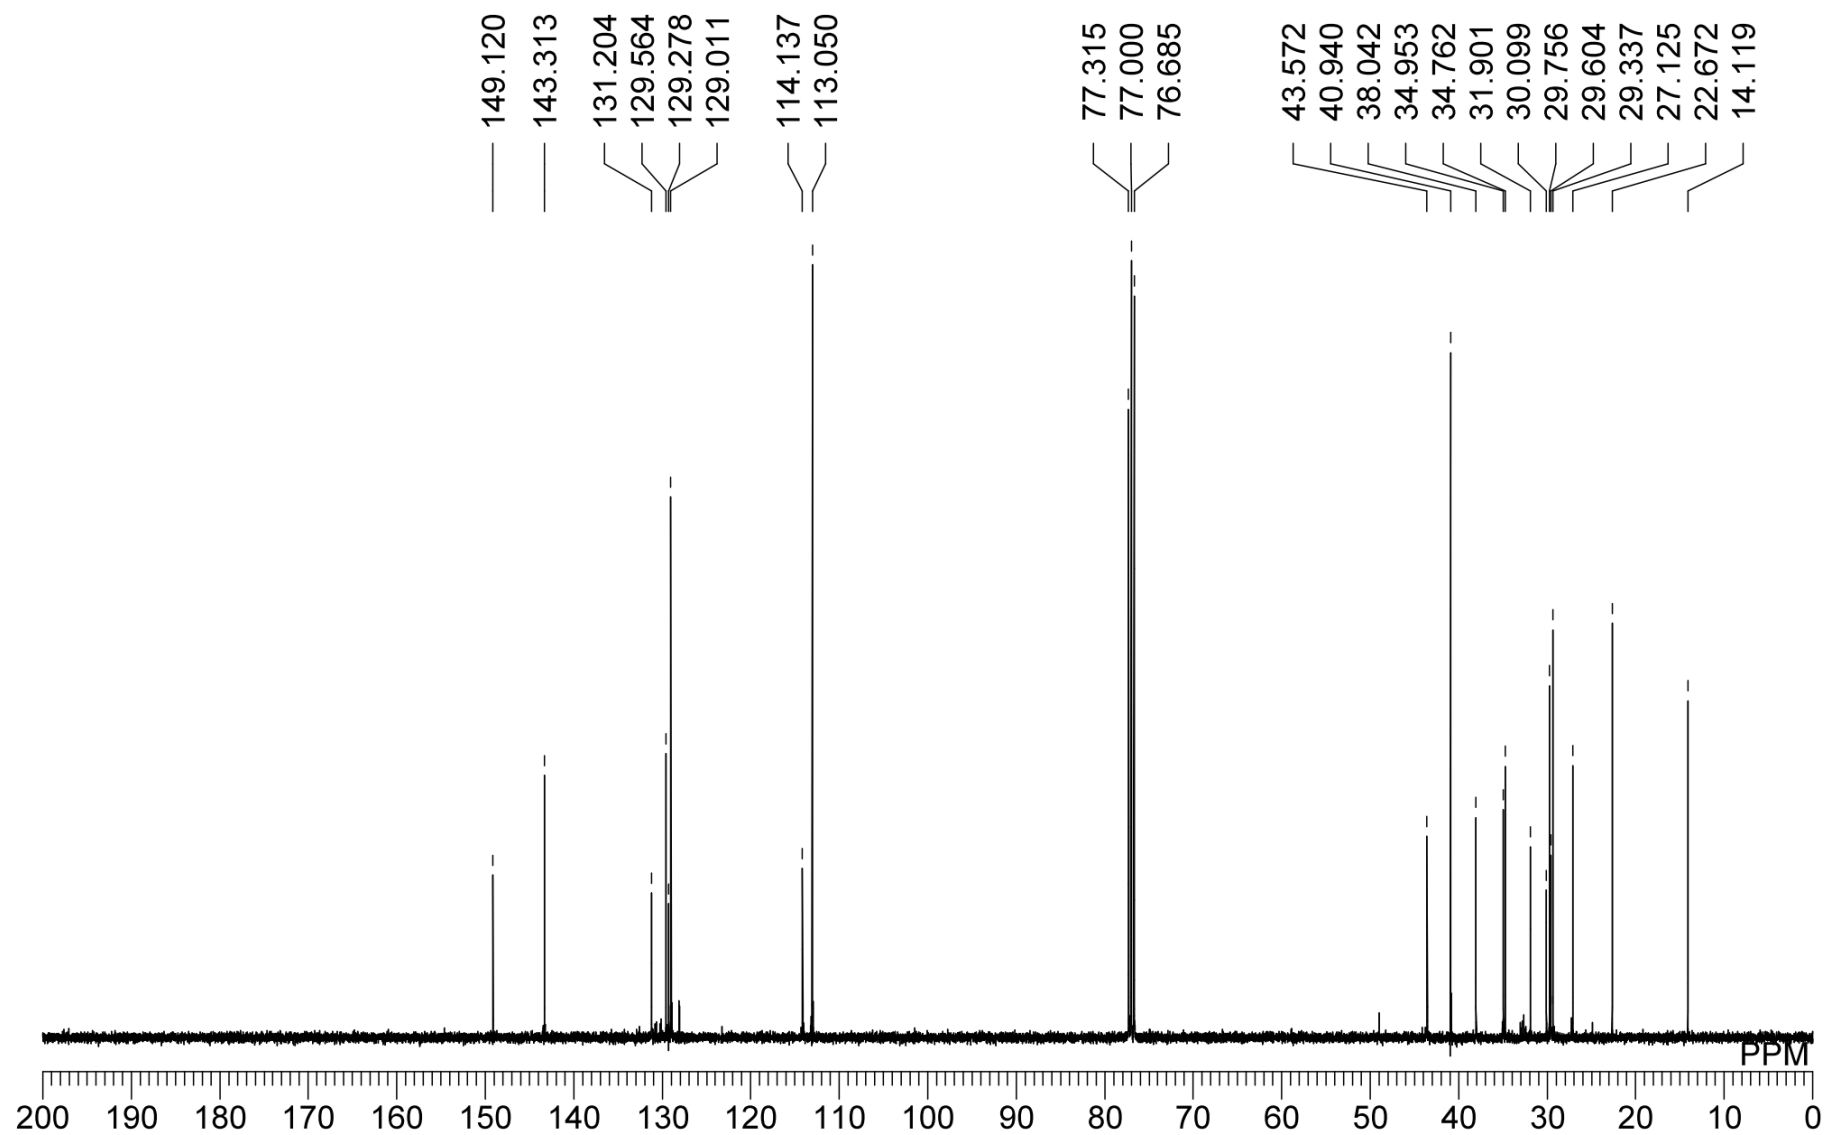

<sup>1</sup>H NMR of 3ag

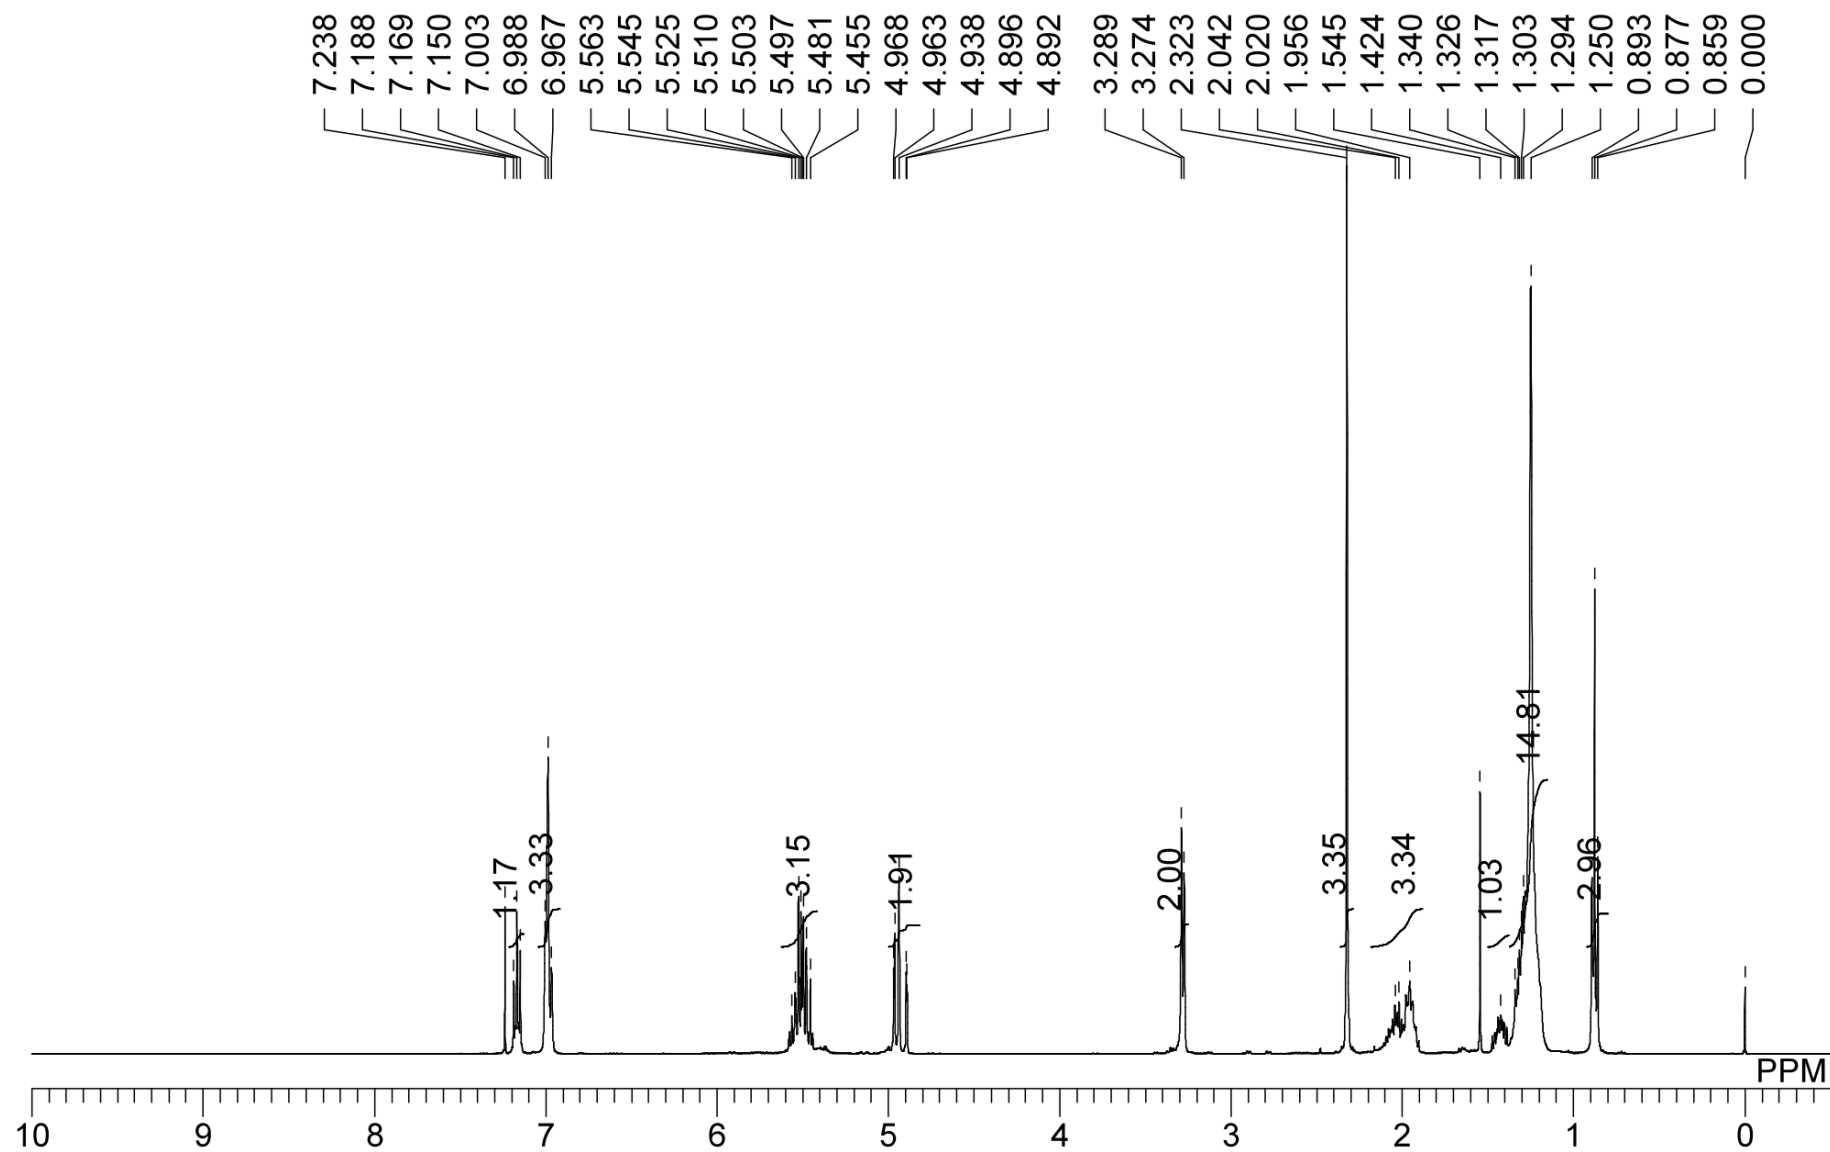

$^{13}\text{C}\{^1\text{H}\}$  NMR of **3ag**

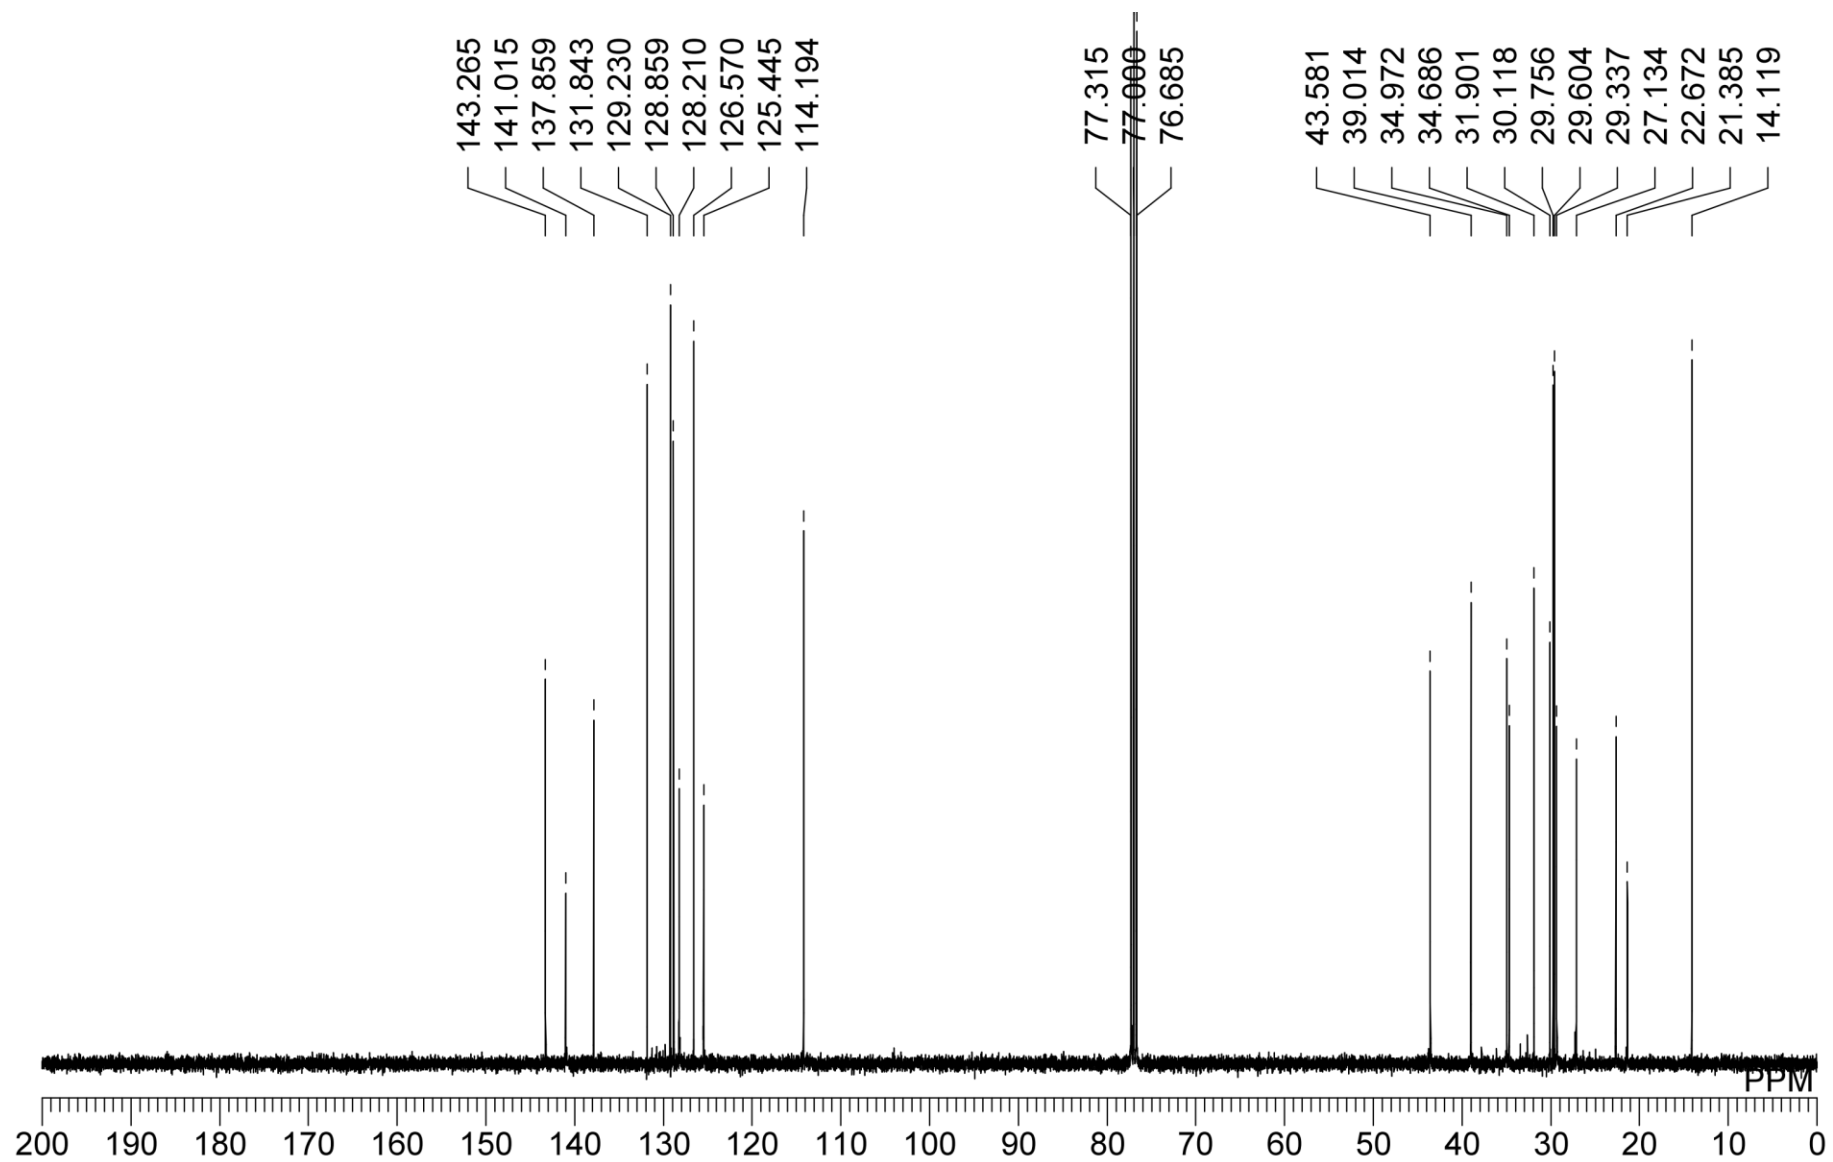

<sup>1</sup>H NMR of 3ah

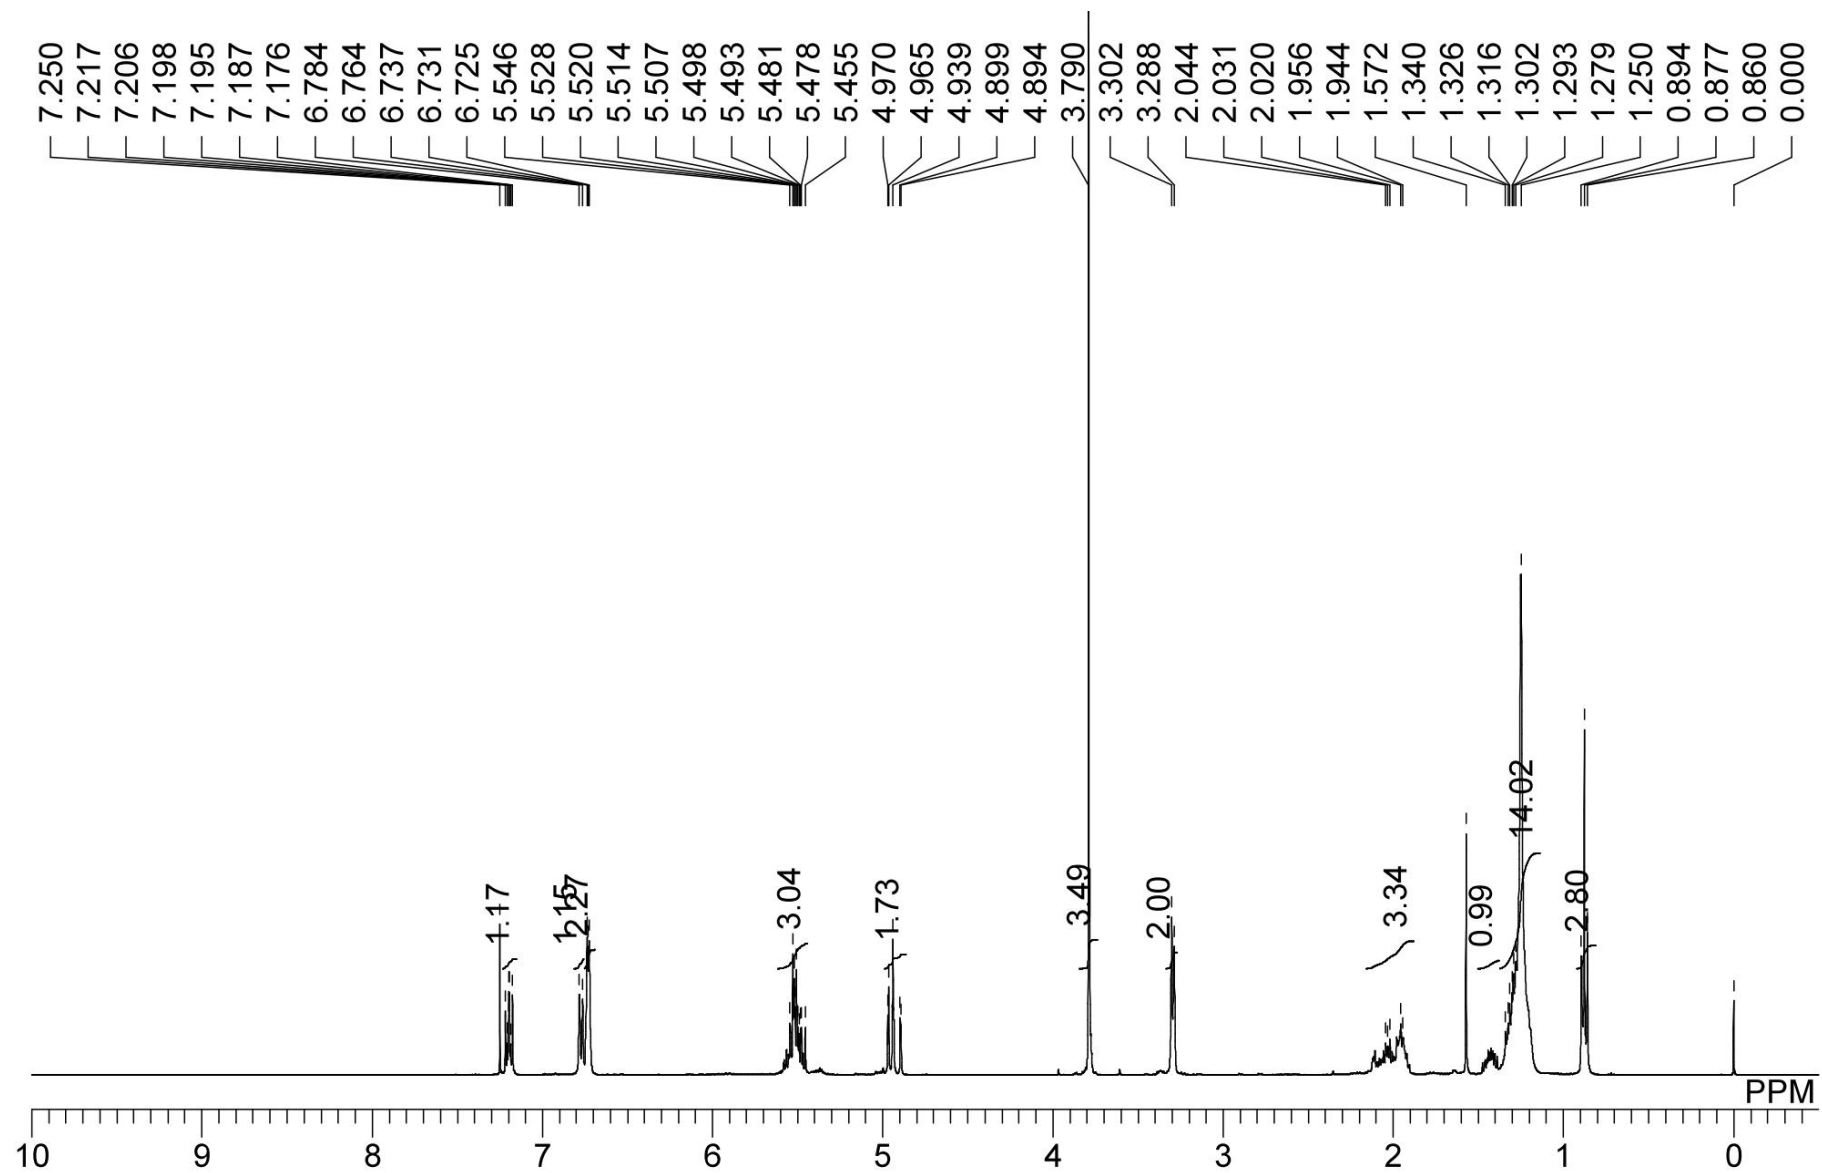

$^{13}\text{C}\{^1\text{H}\}$  NMR of **3ah**

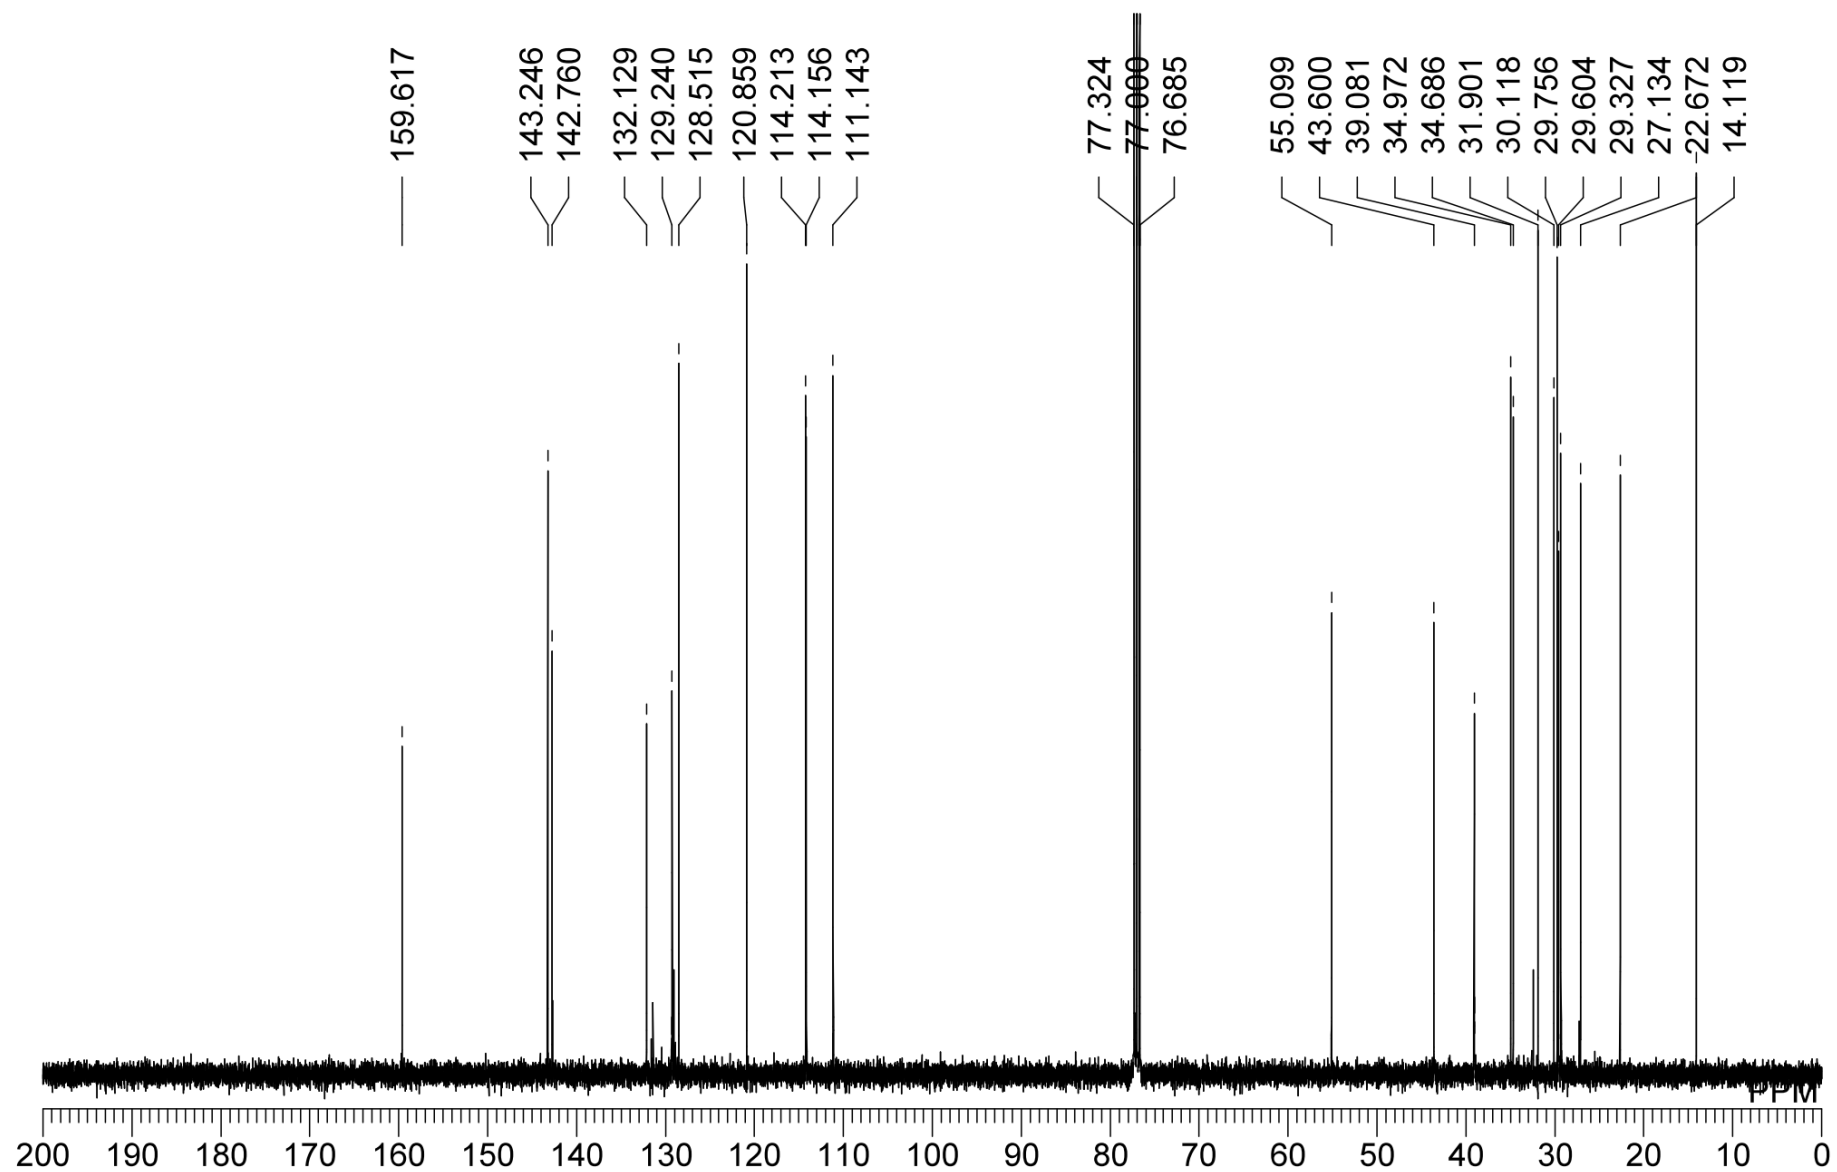



<sup>1</sup>H NMR of **3gb**

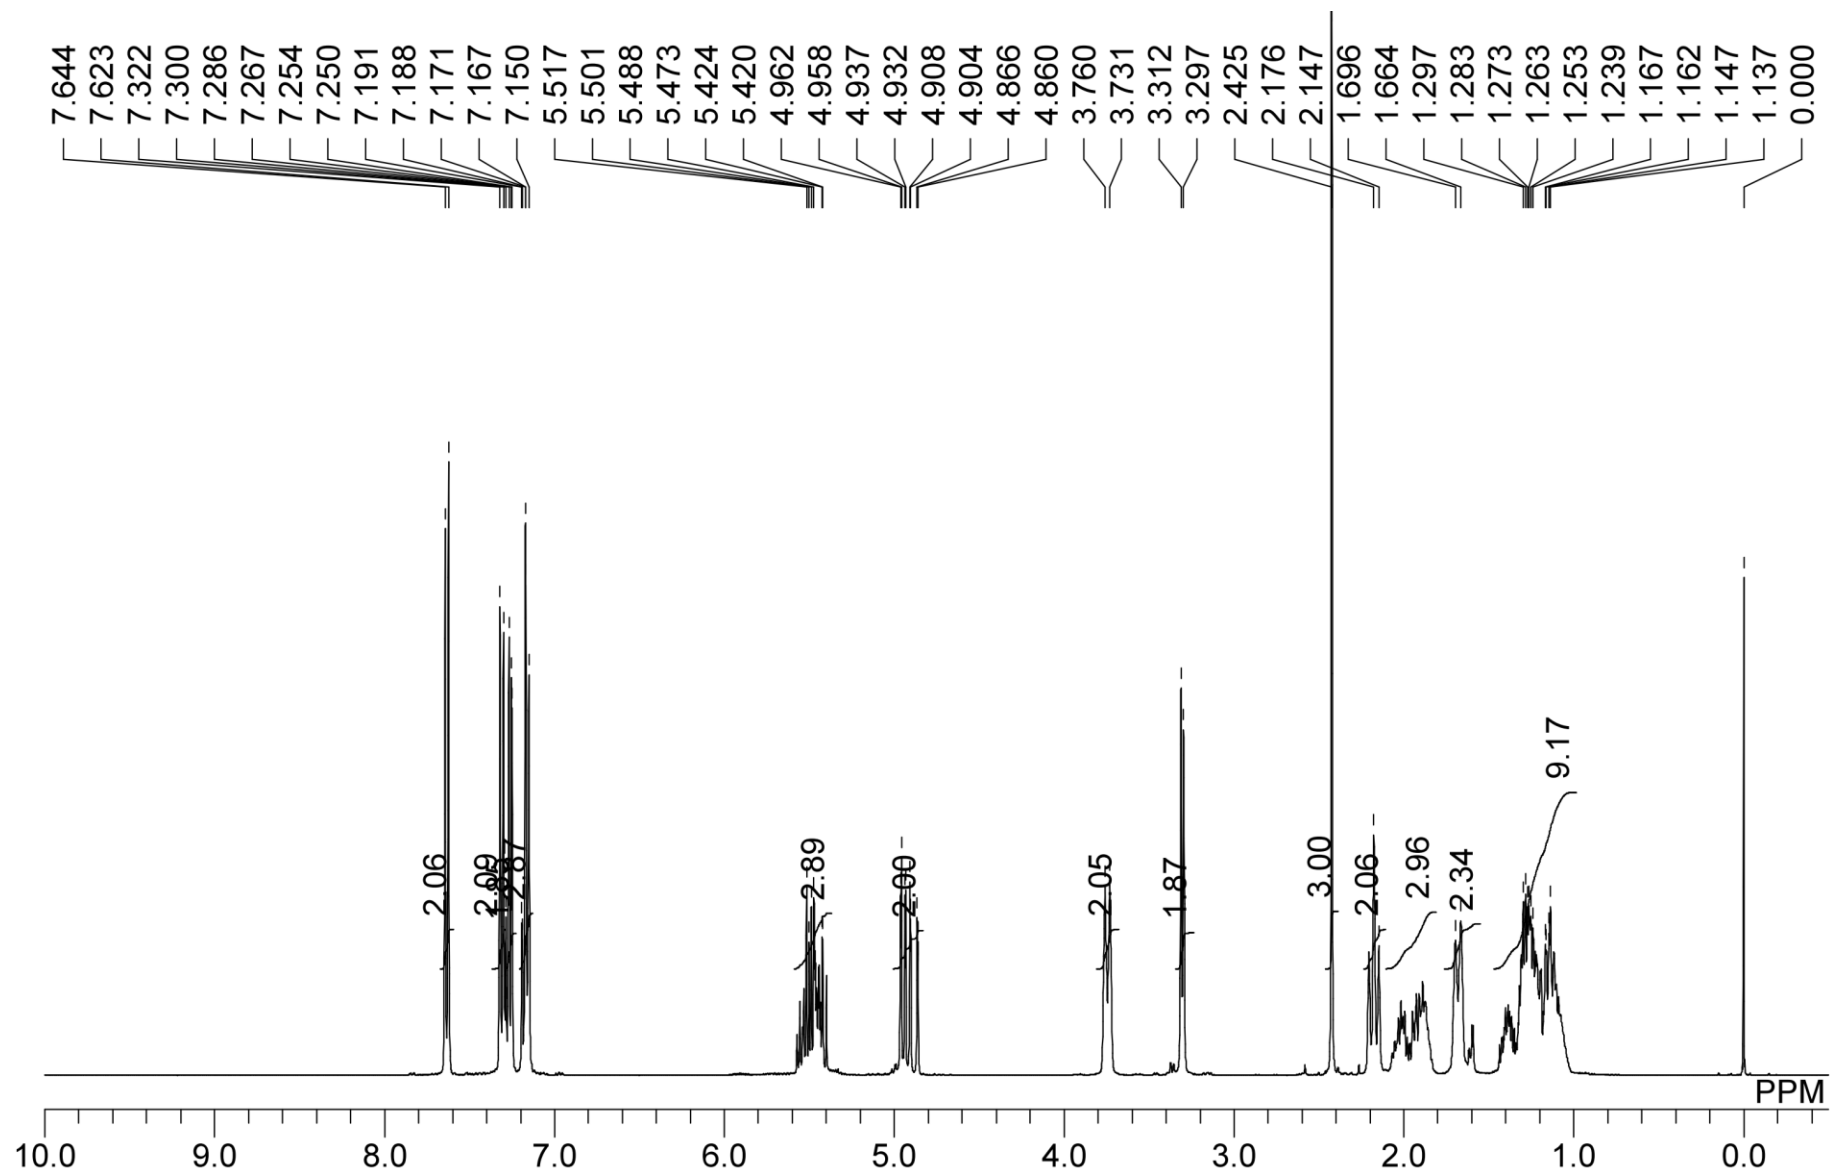

$^{13}\text{C}\{^1\text{H}\}$  NMR of **3gb**

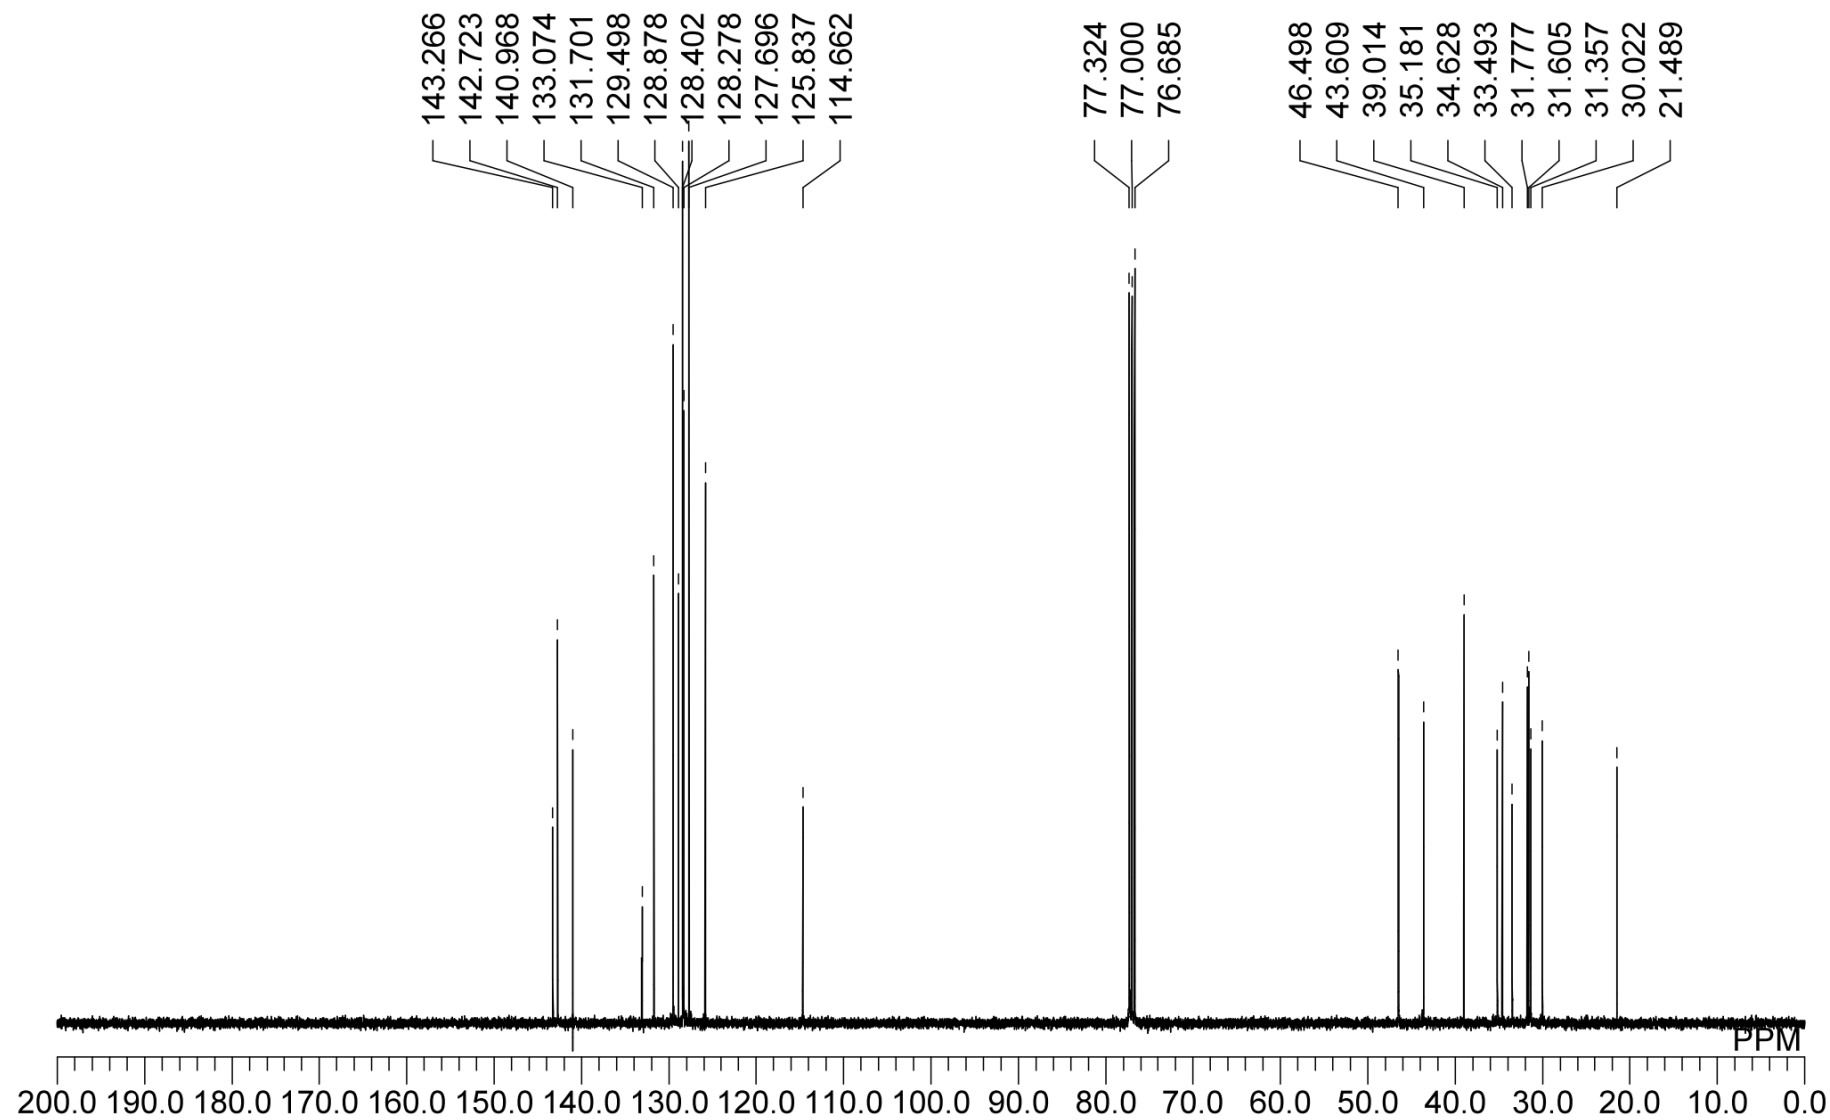

<sup>1</sup>H NMR of 3gc

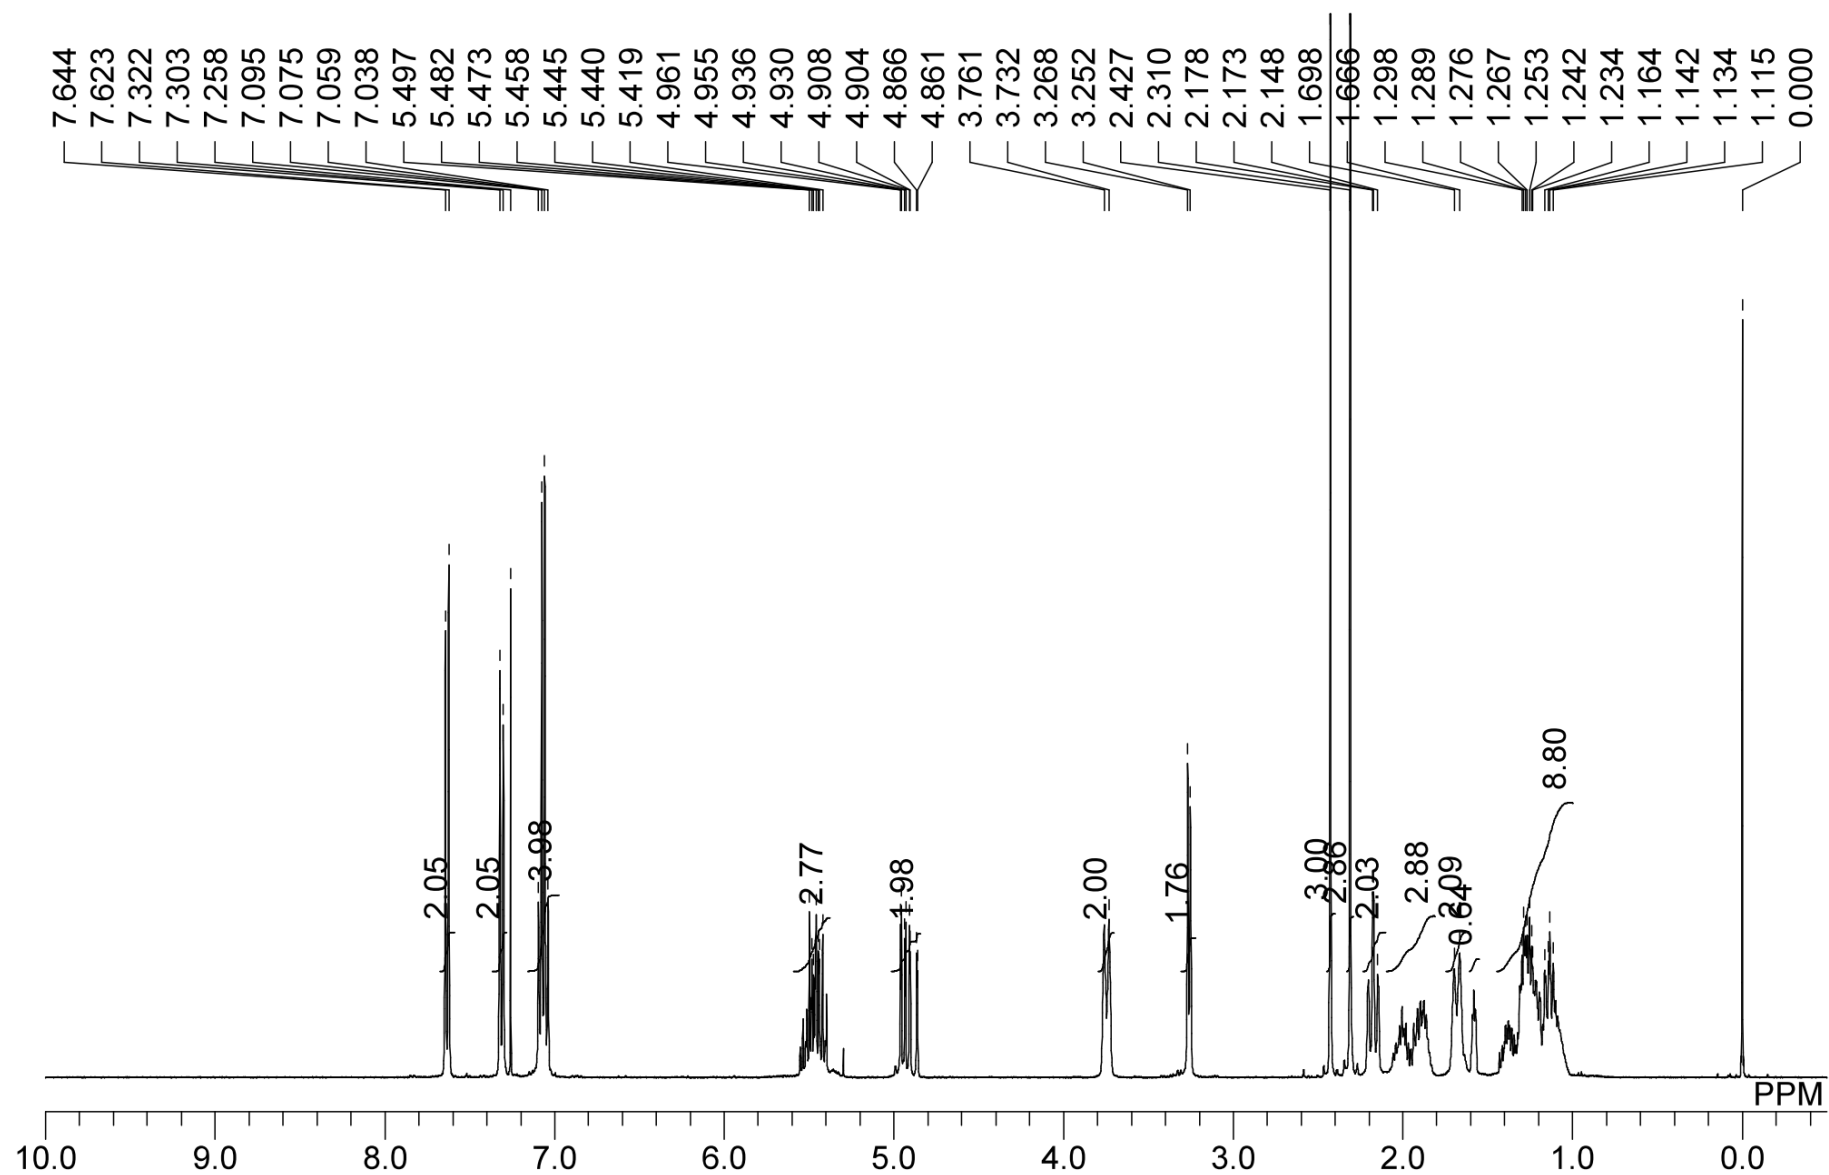

$^{13}\text{C}\{^1\text{H}\}$  NMR of **3gc**

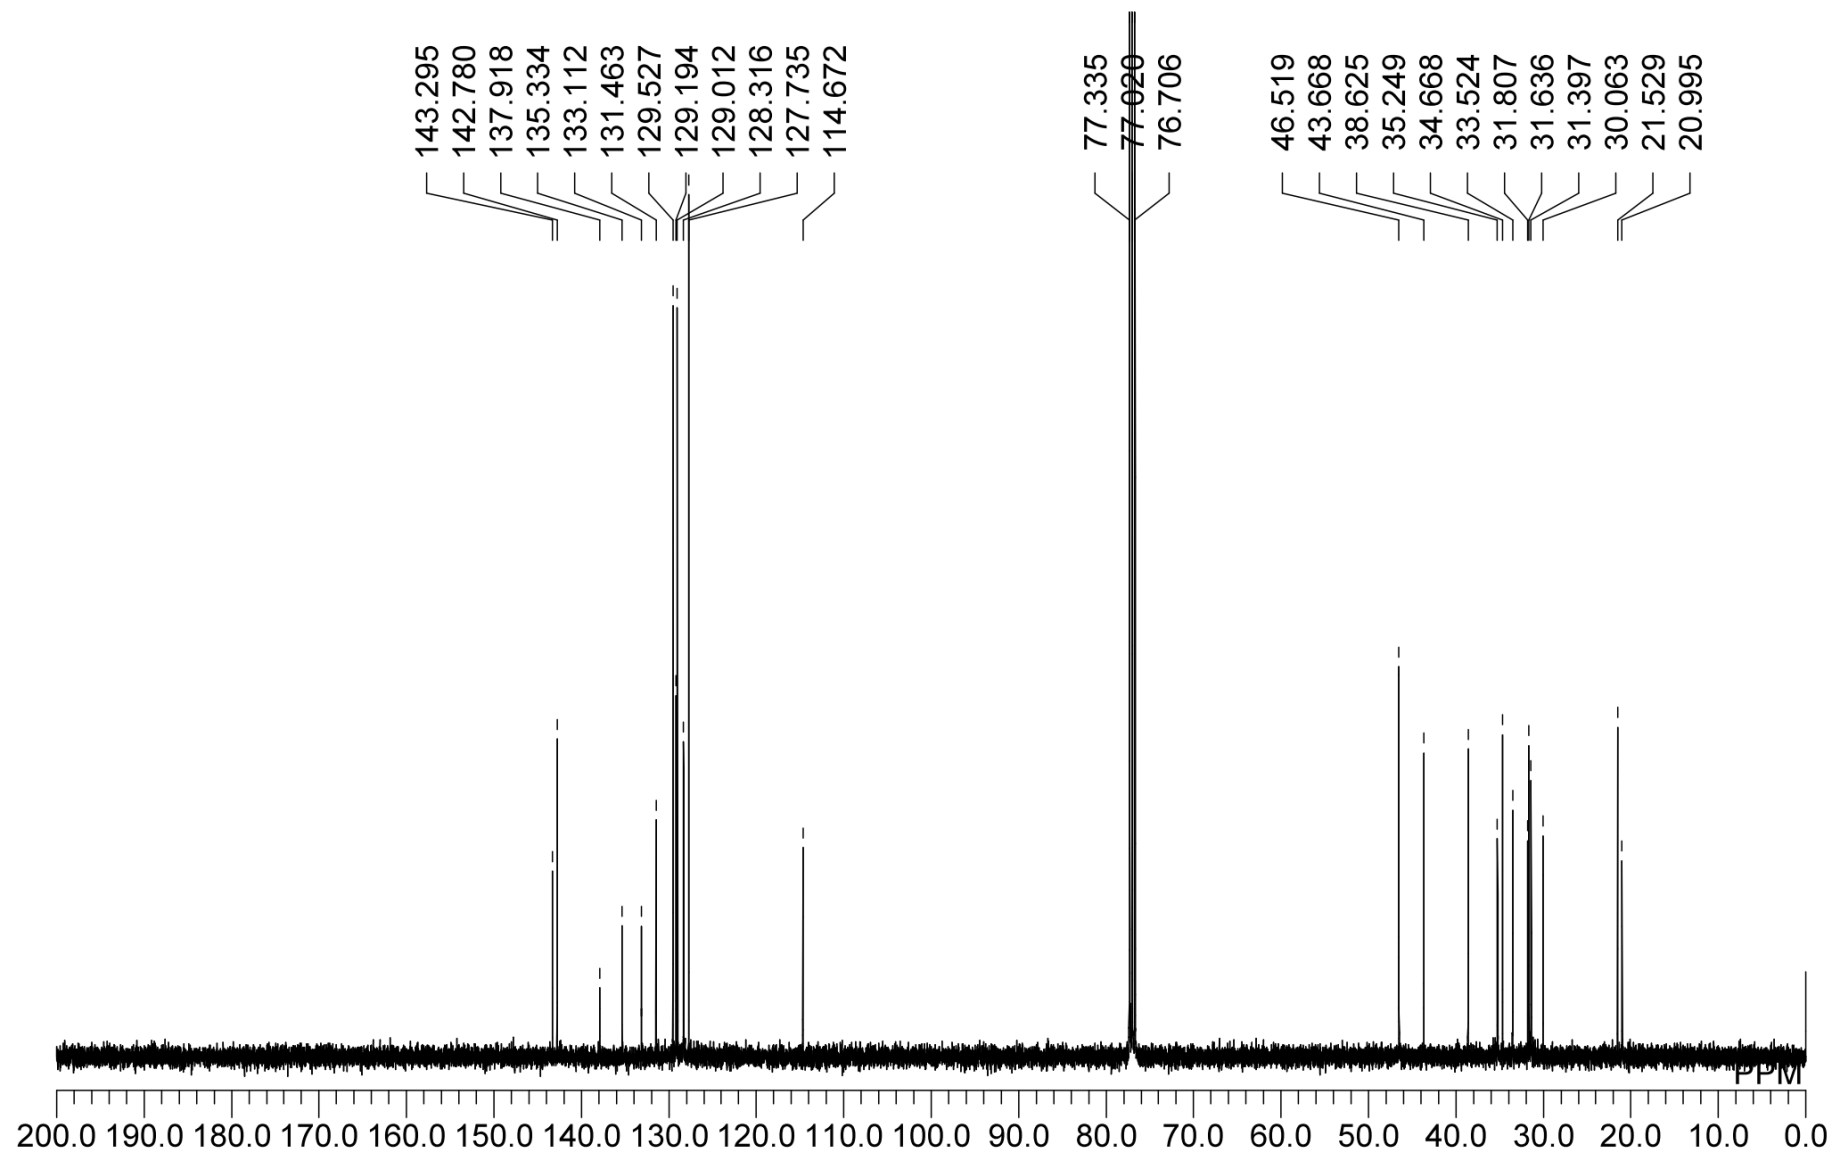

<sup>1</sup>H NMR of 3gg

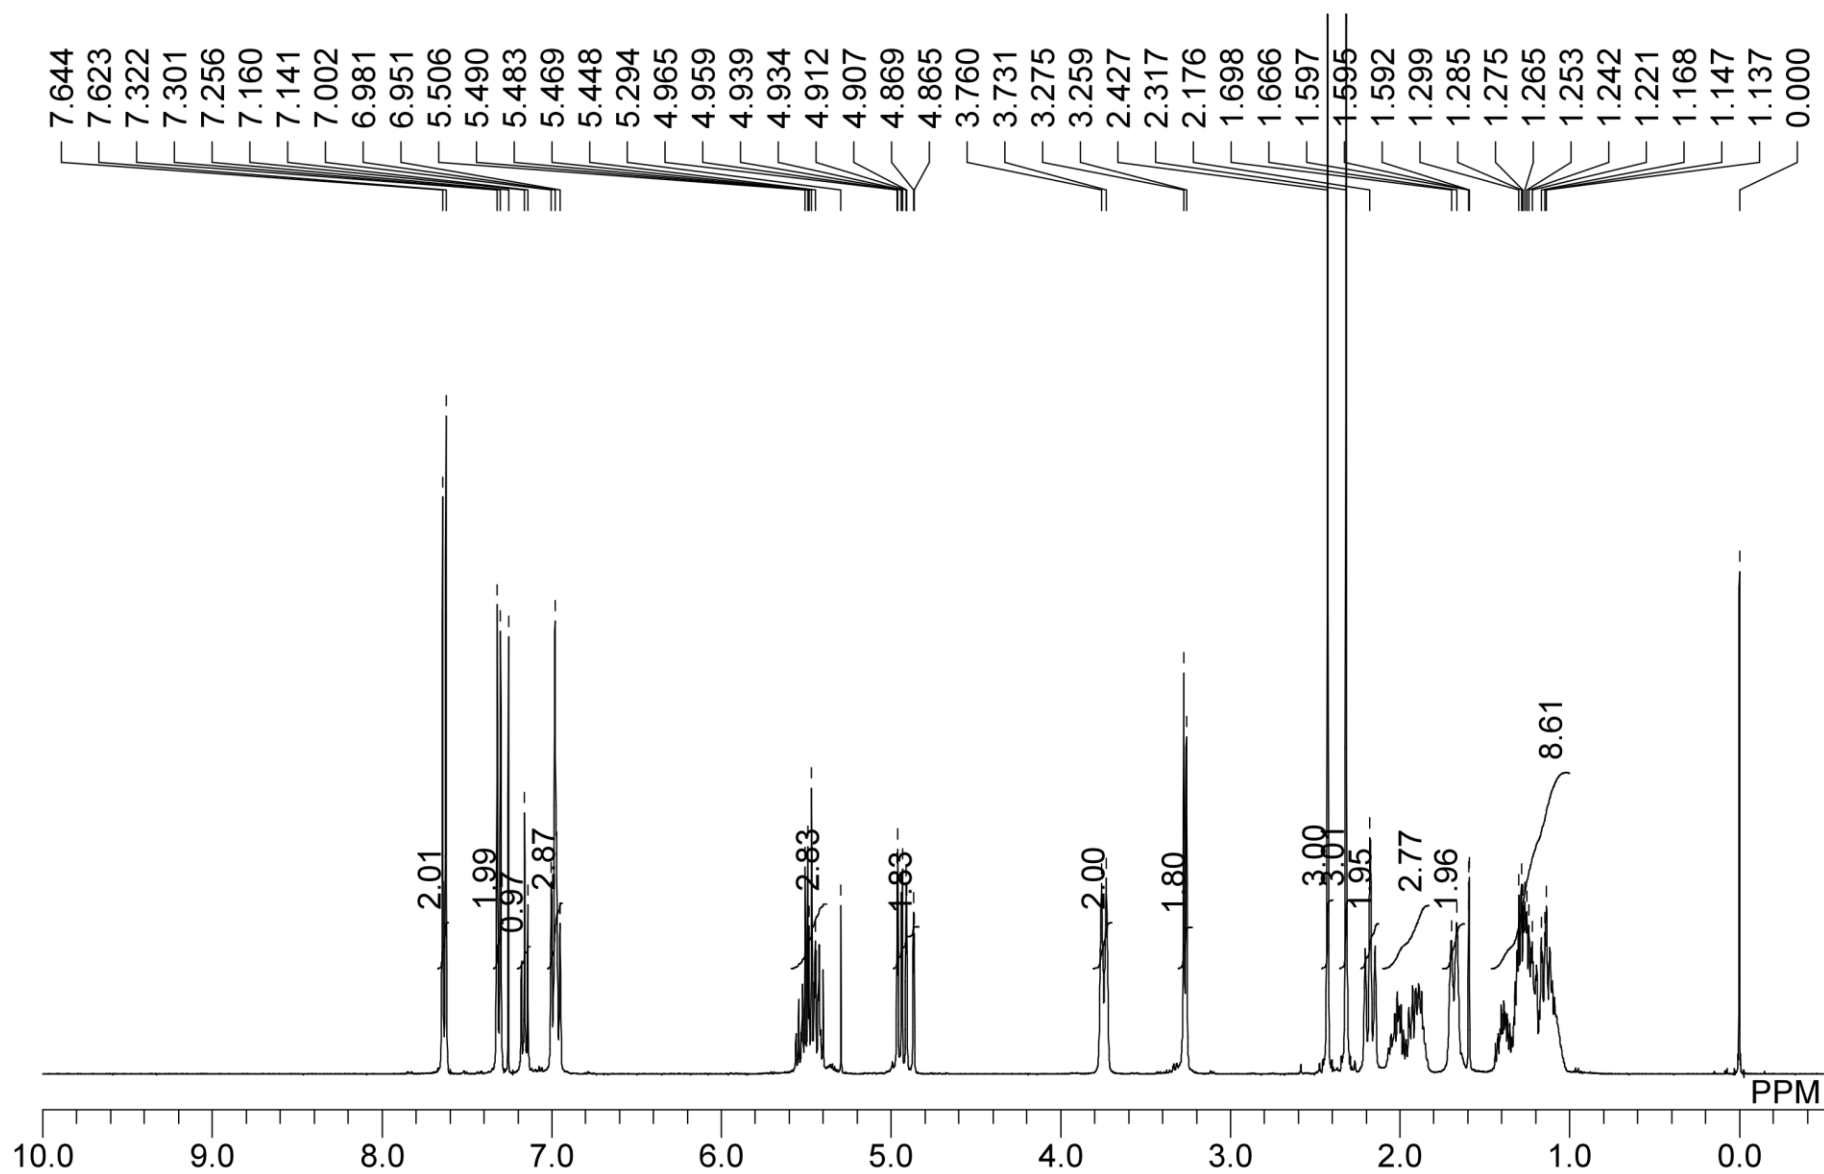

$^{13}\text{C}\{^1\text{H}\}$  NMR of **3gg**

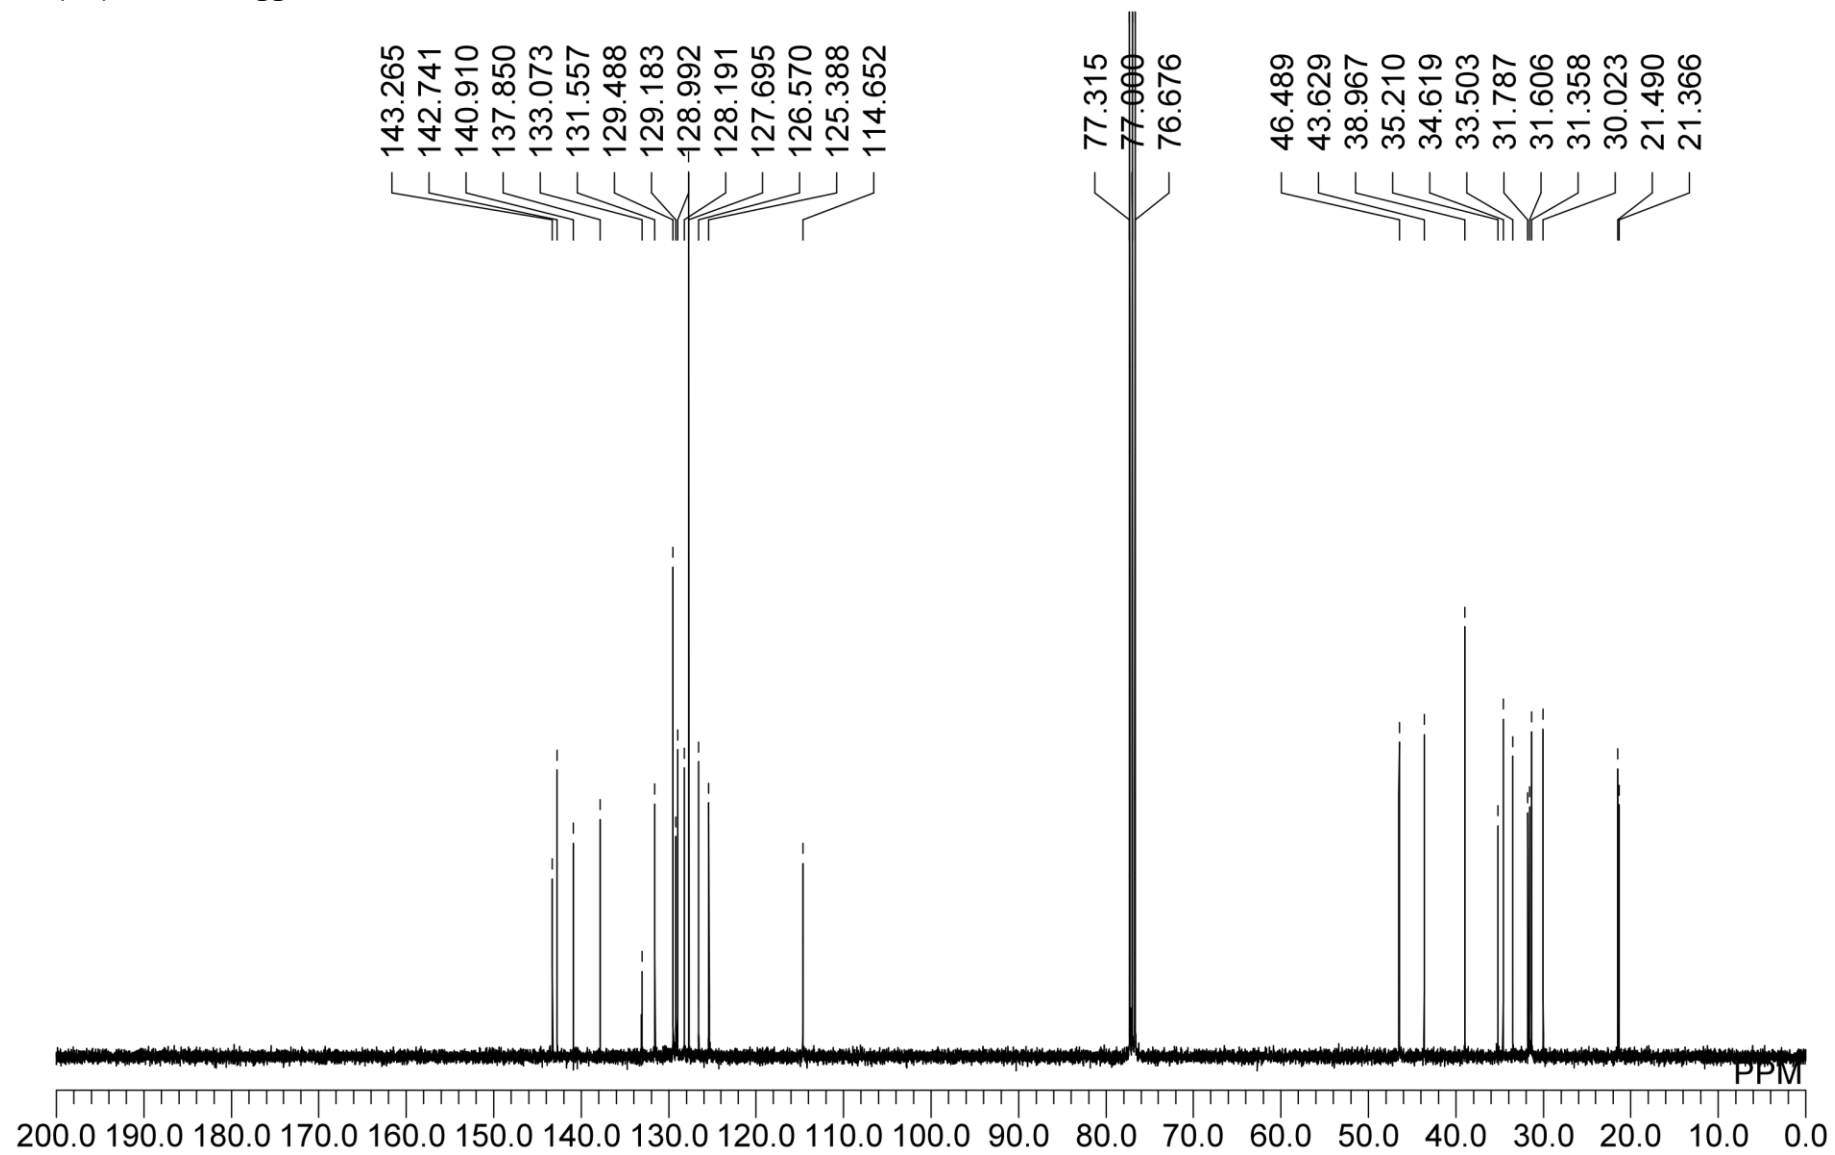

<sup>1</sup>H NMR of 3gj

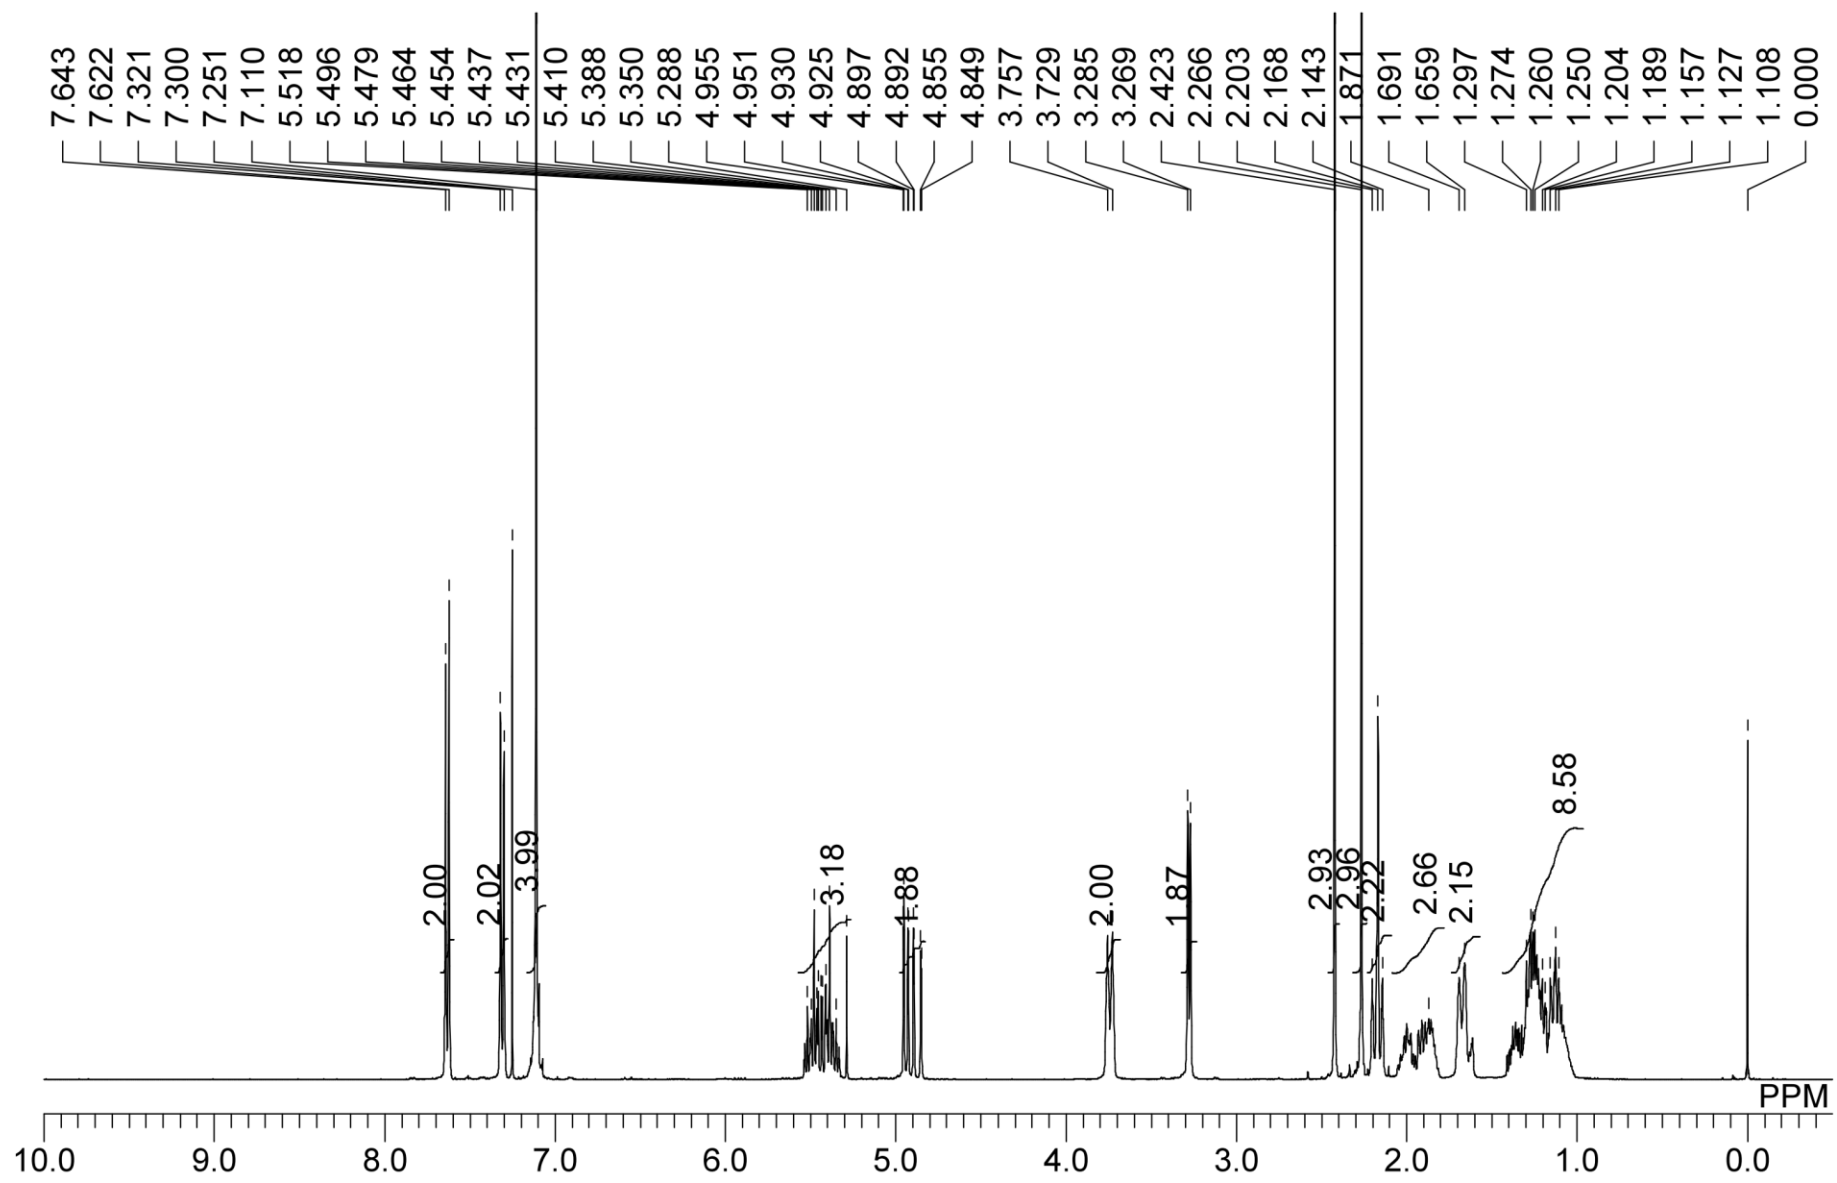

$^{13}\text{C}\{^1\text{H}\}$  NMR of **3gj**

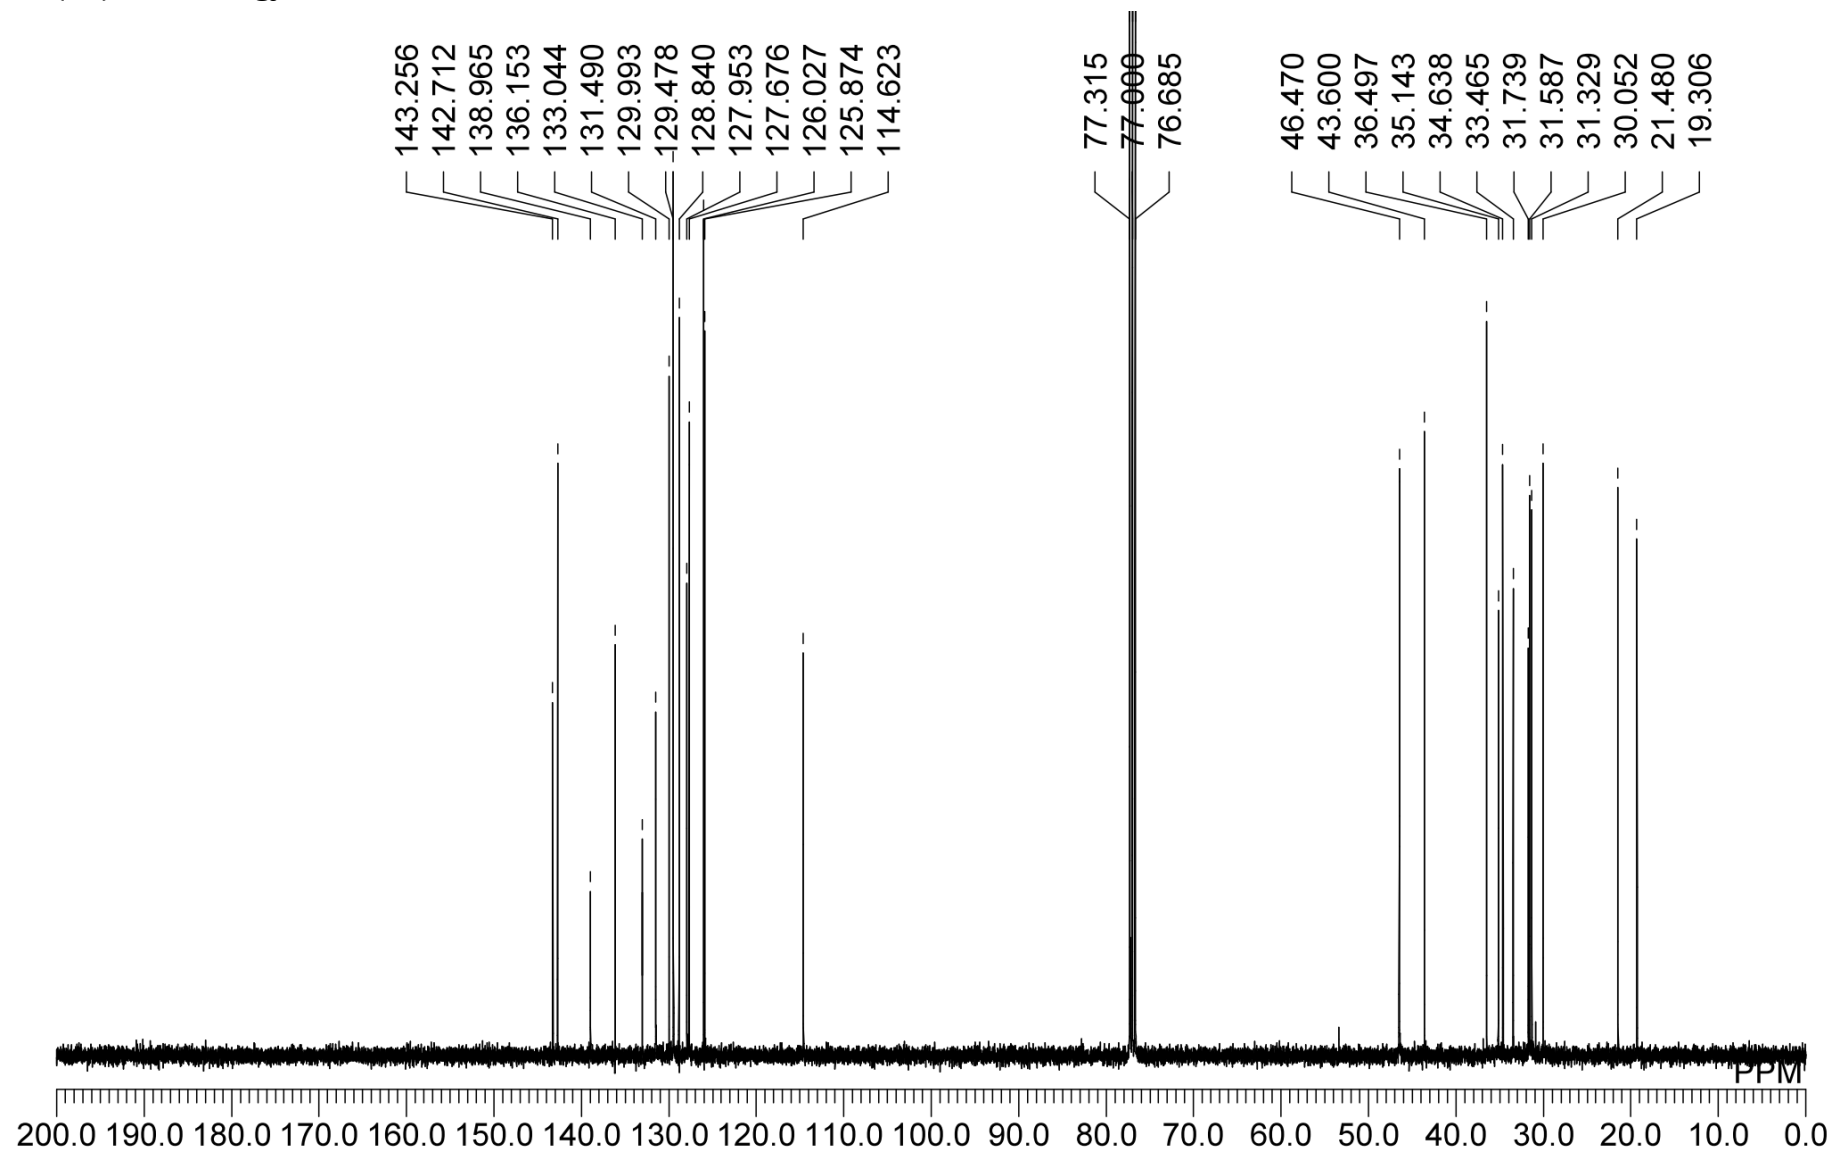



<sup>1</sup>H NMR of 3na

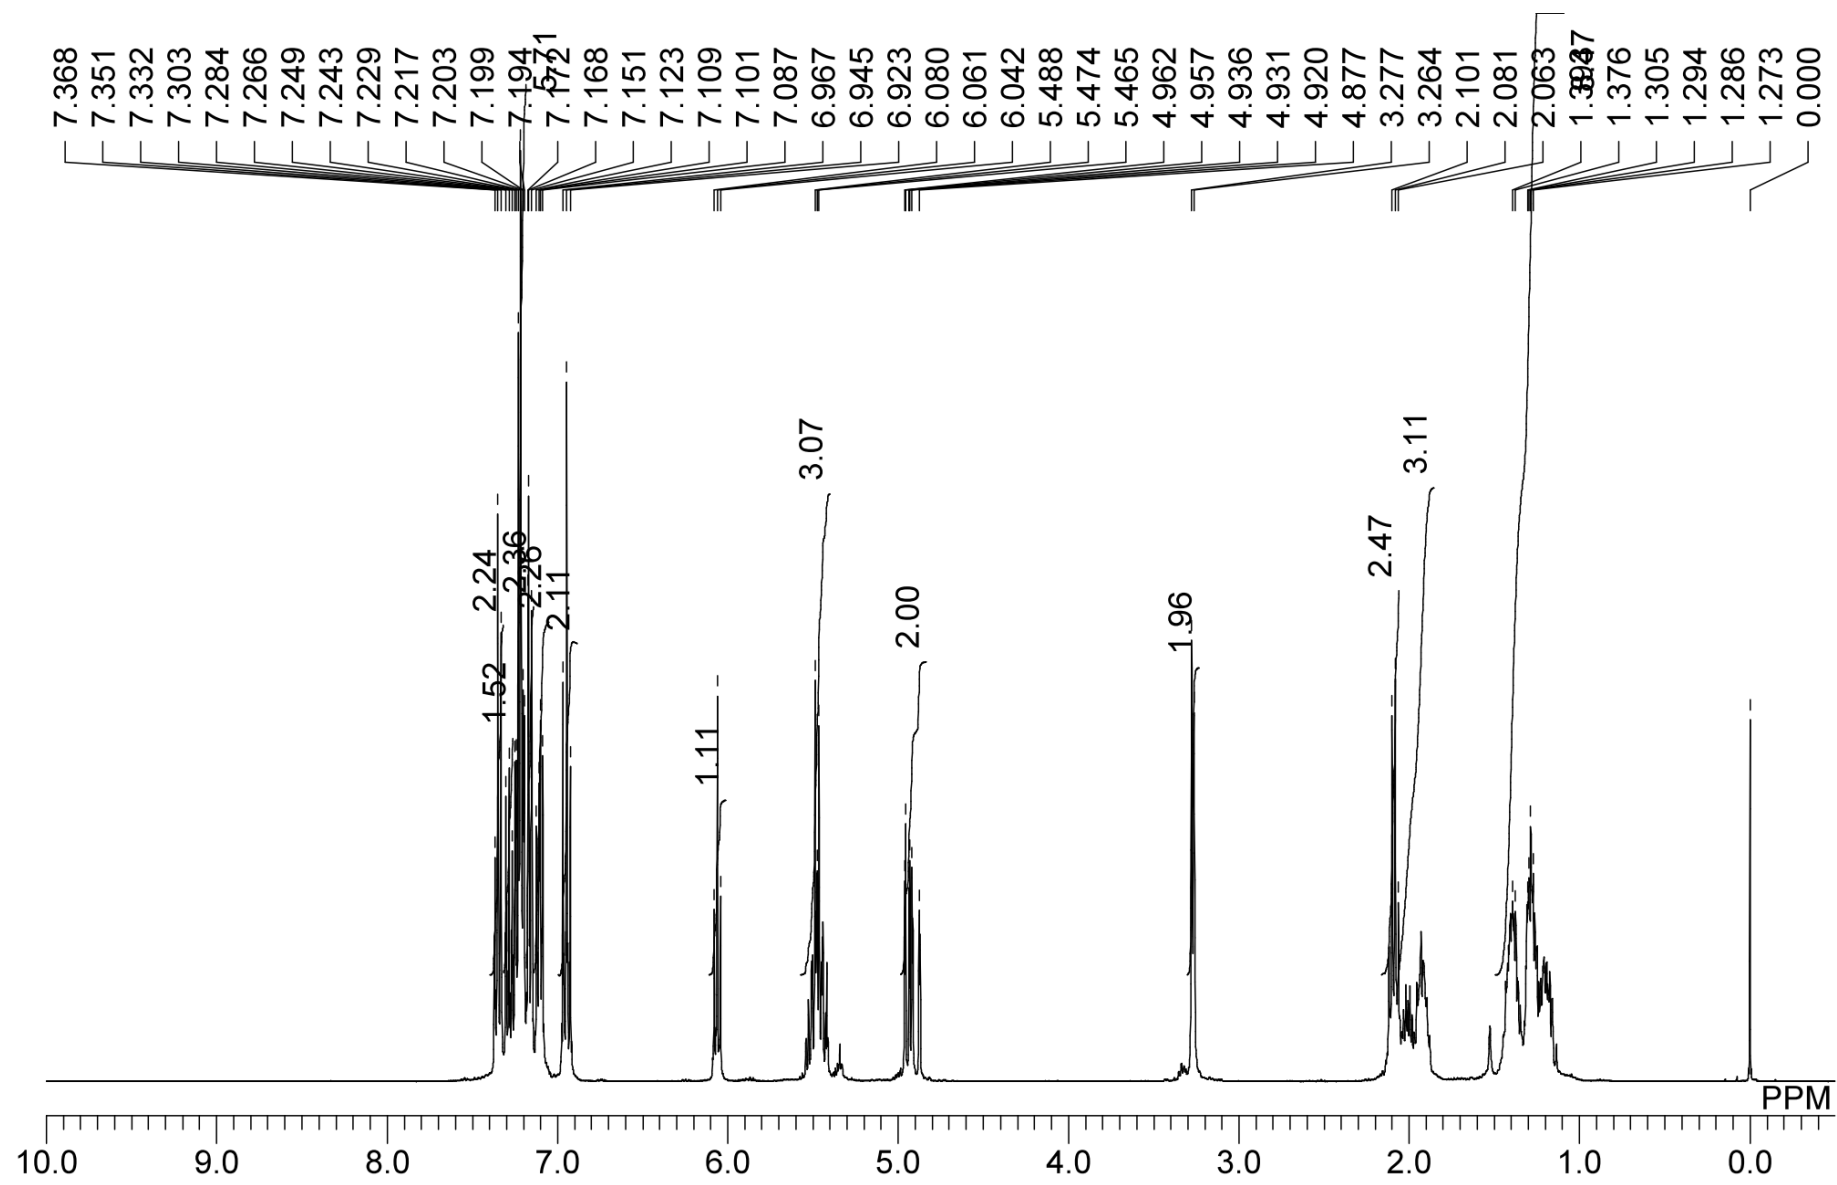

$^{13}\text{C}\{^1\text{H}\}$  NMR of **3na**

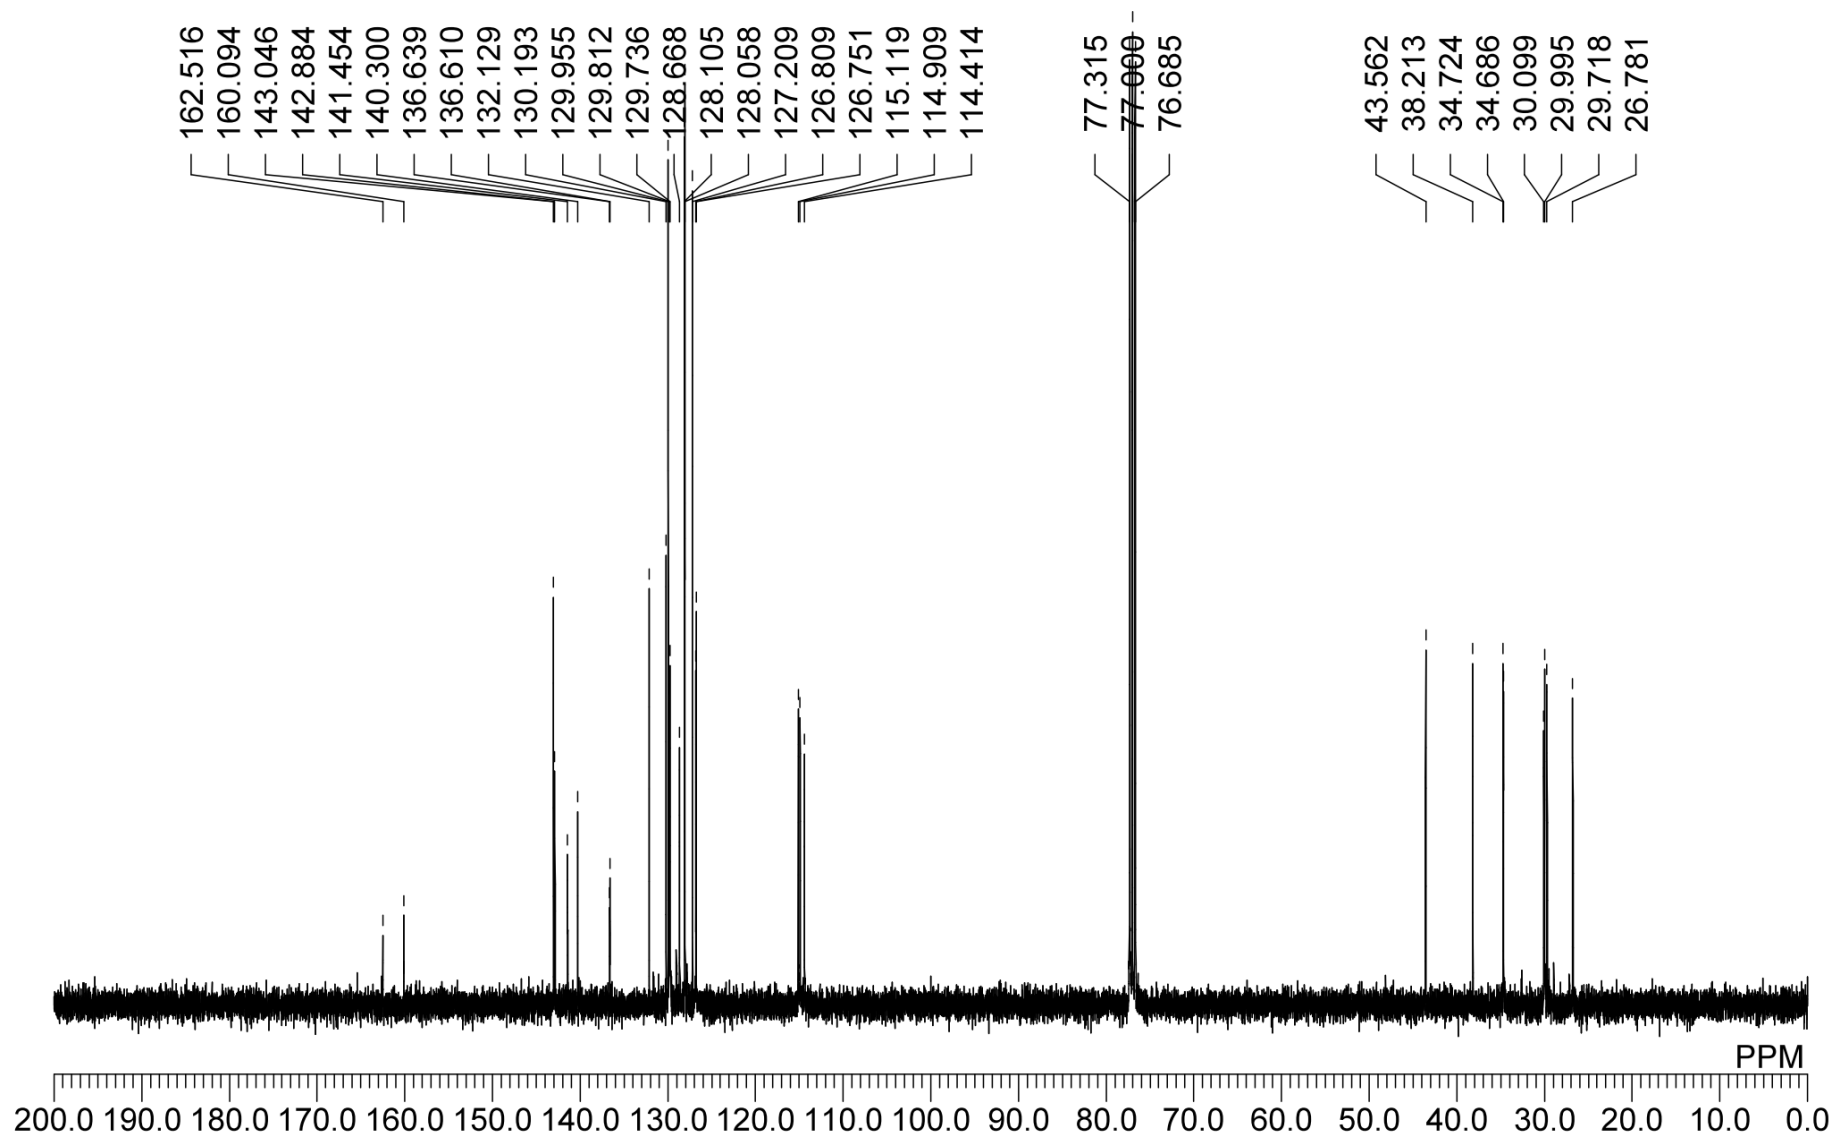

<sup>1</sup>H NMR of 4ba

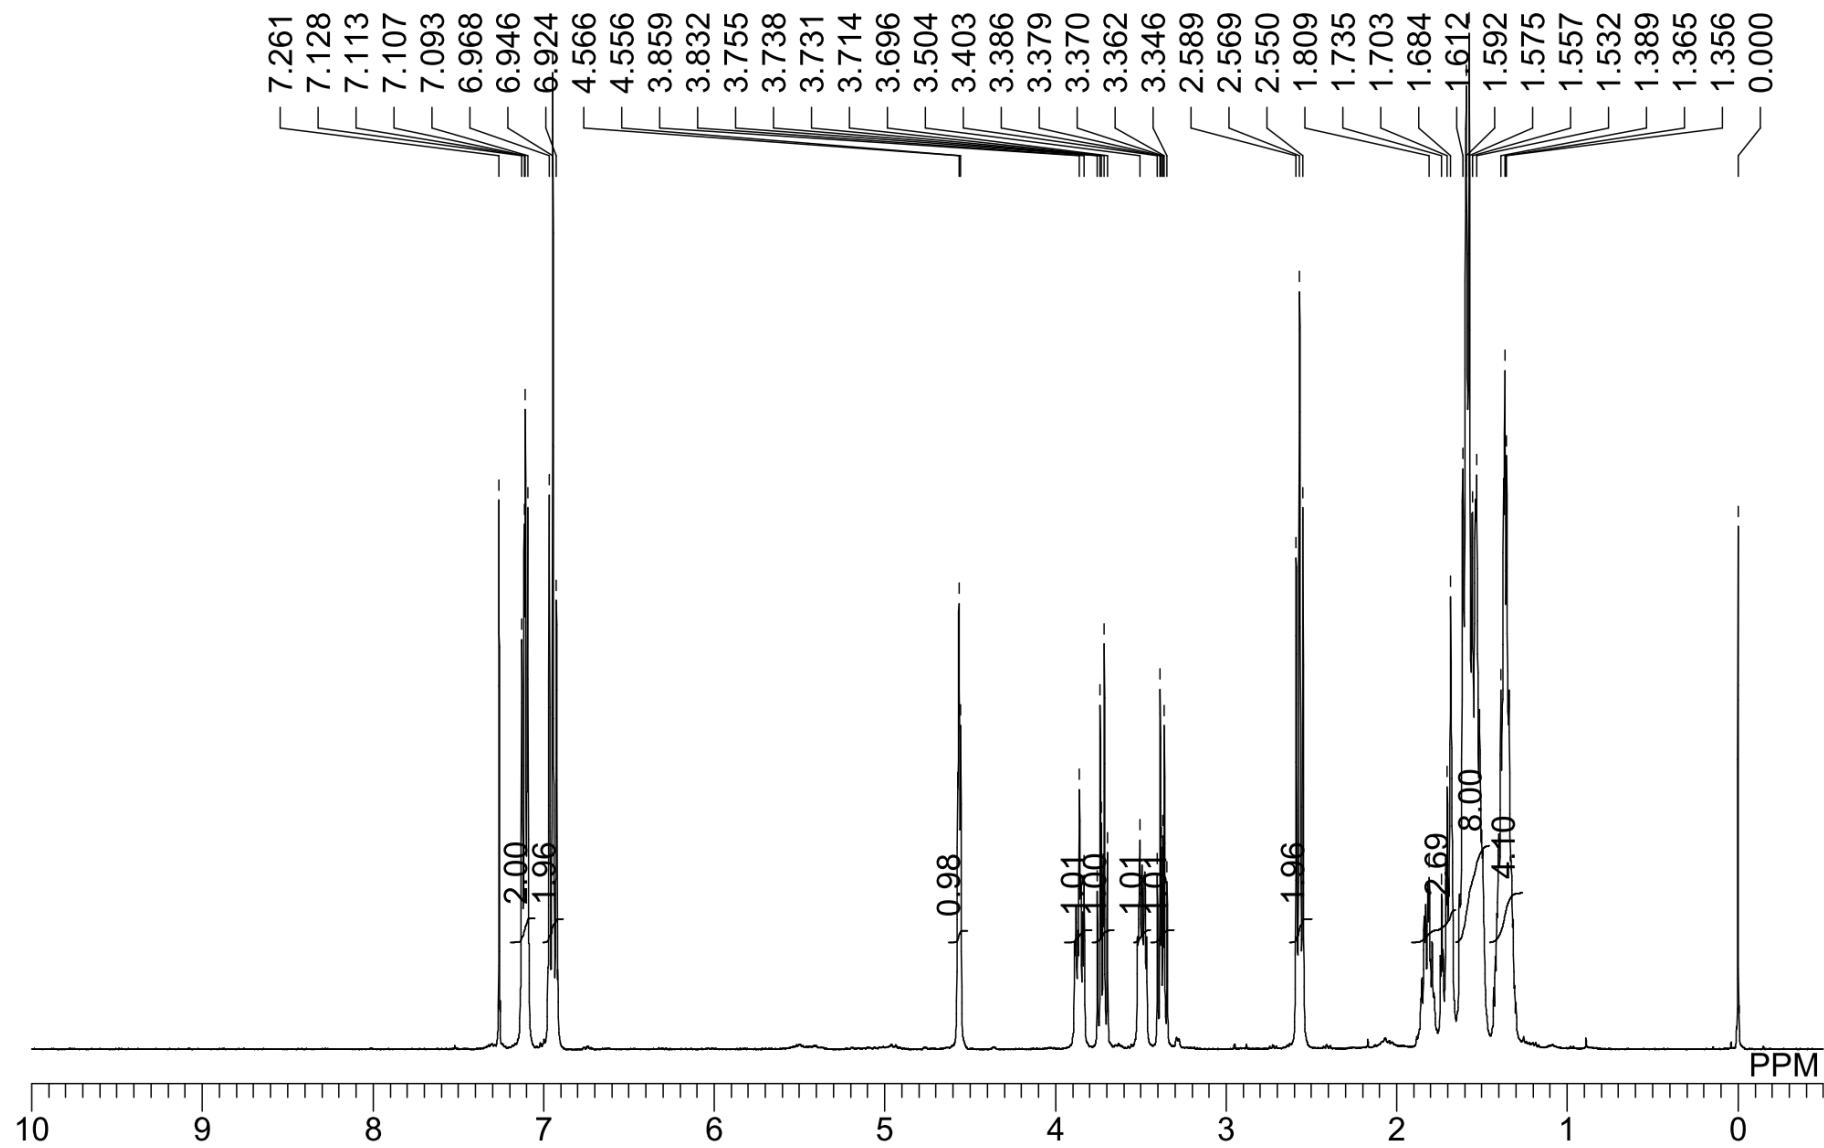

$^{13}\text{C}\{^1\text{H}\}$  NMR of **4ba**

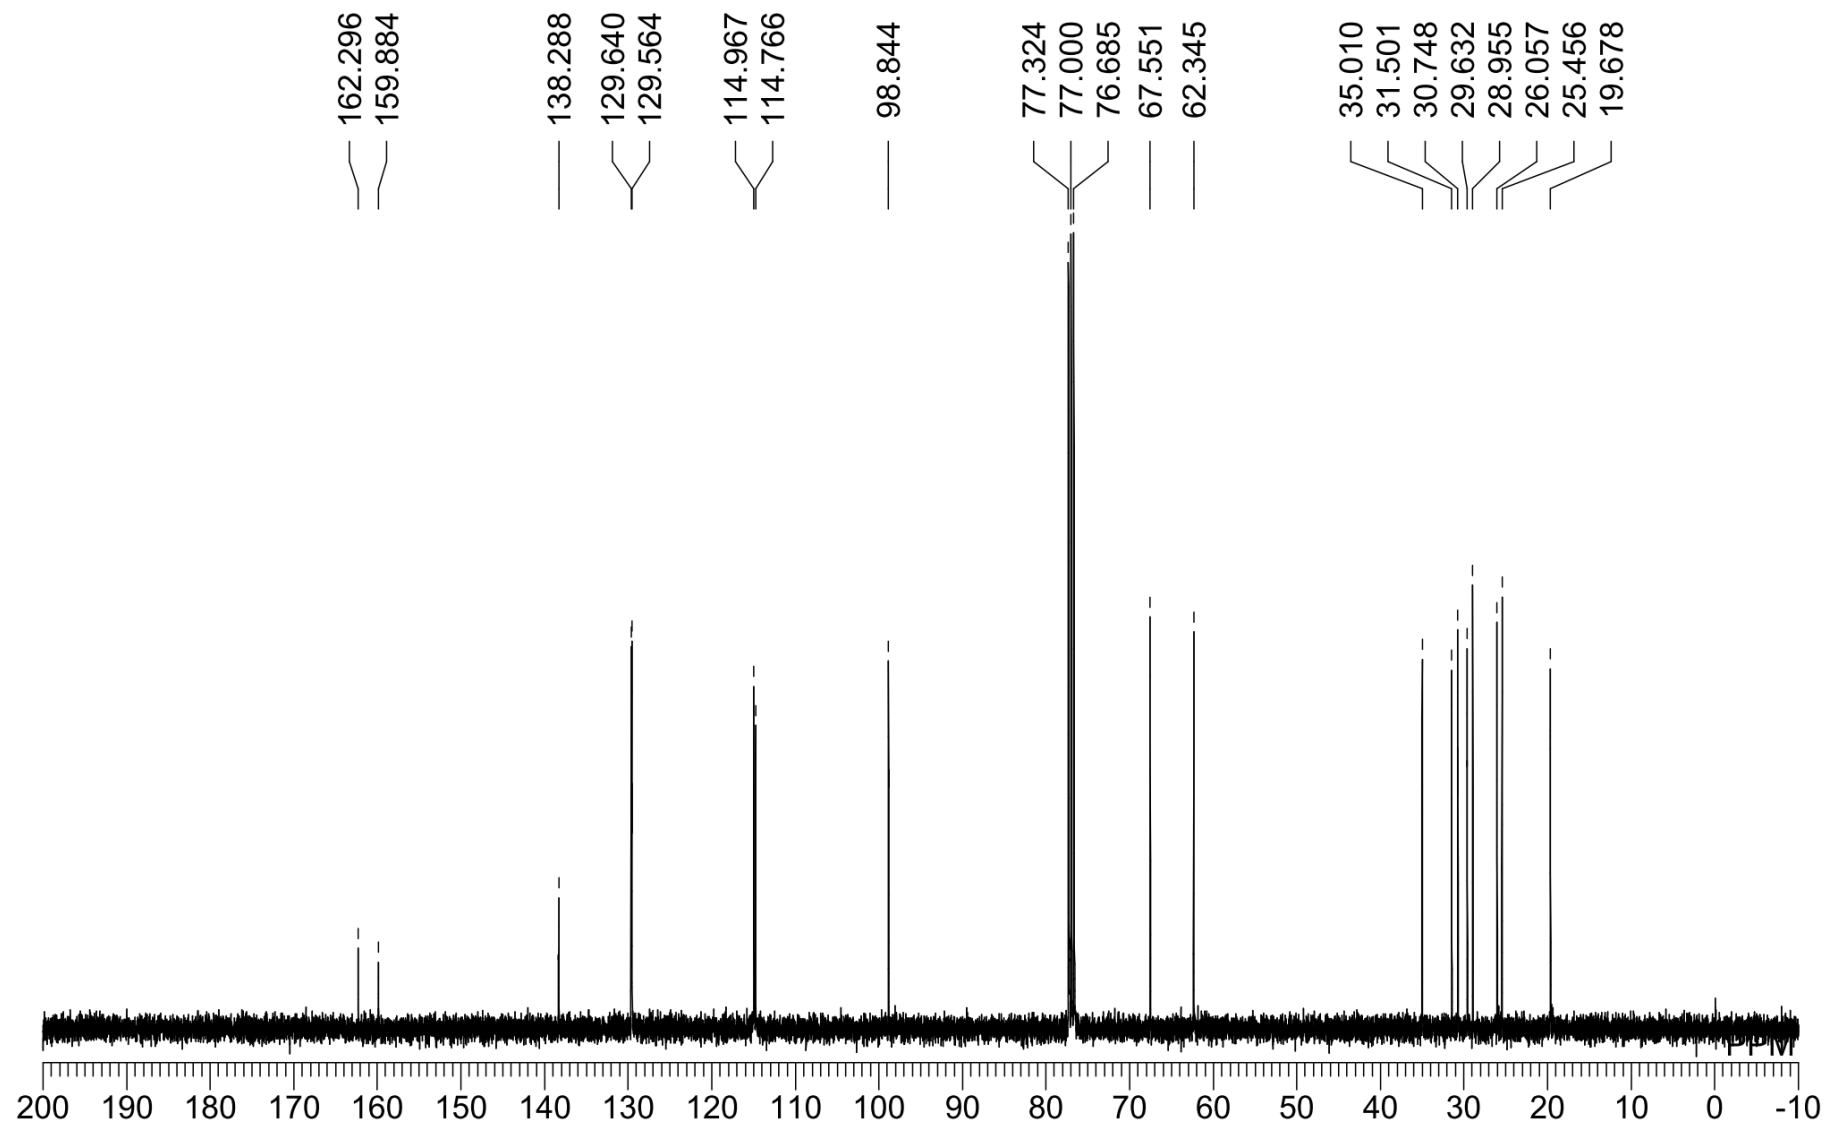

<sup>1</sup>H NMR of 4ca

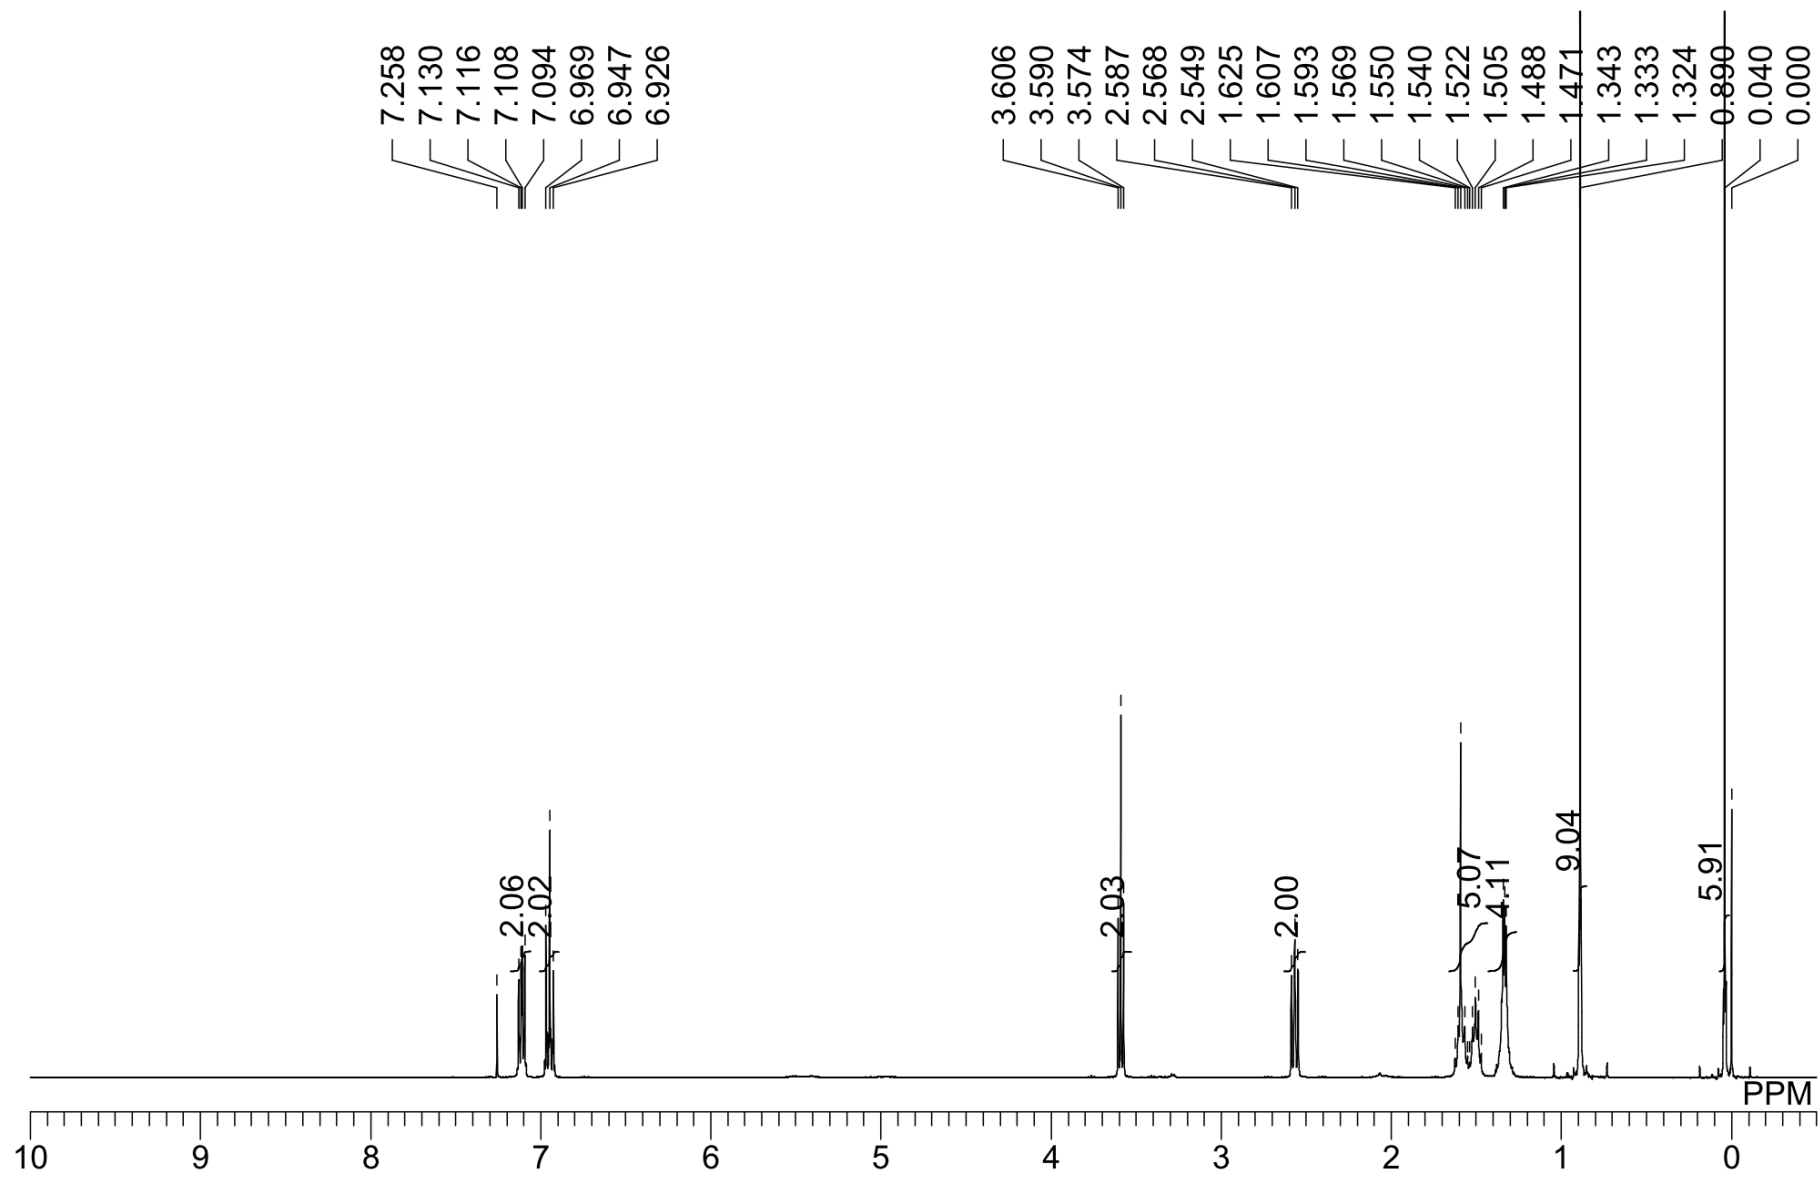

$^{13}\text{C}\{^1\text{H}\}$  NMR of **4ca**

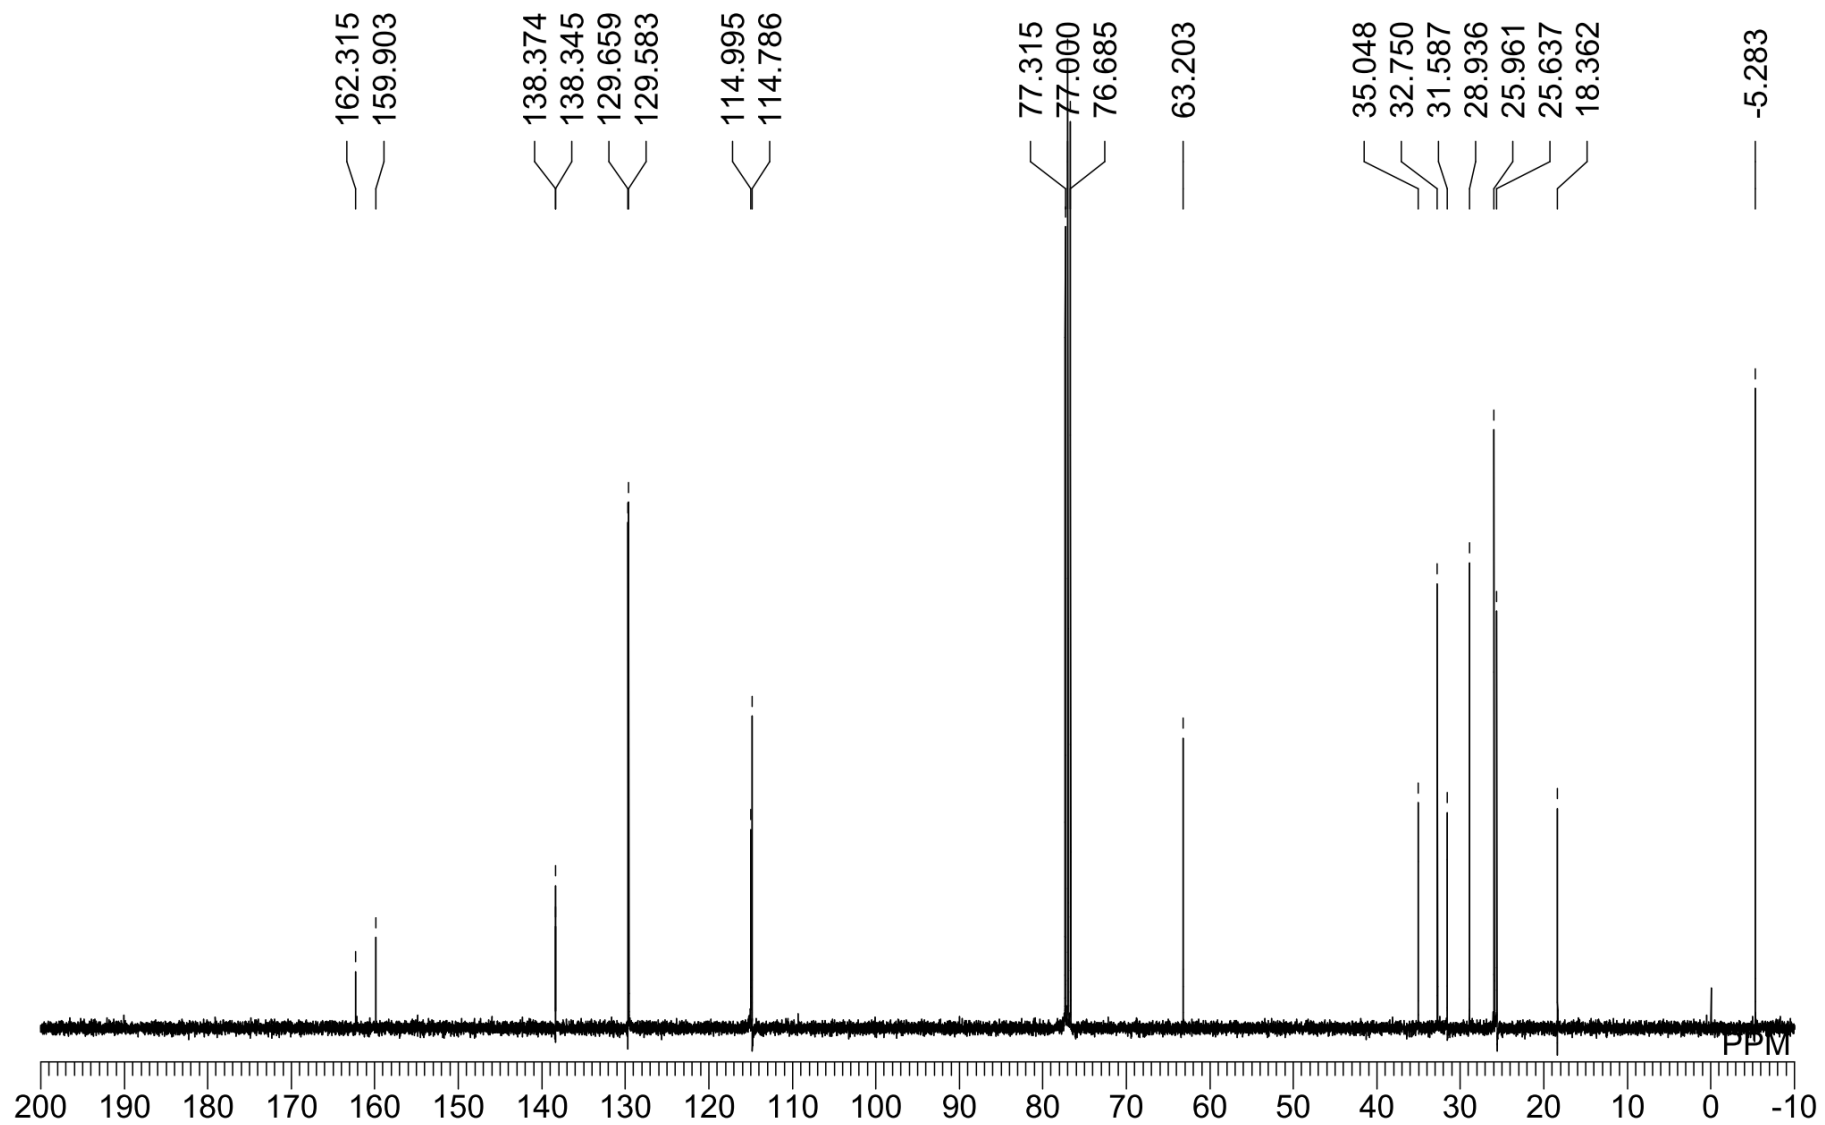

<sup>1</sup>H NMR of 4da

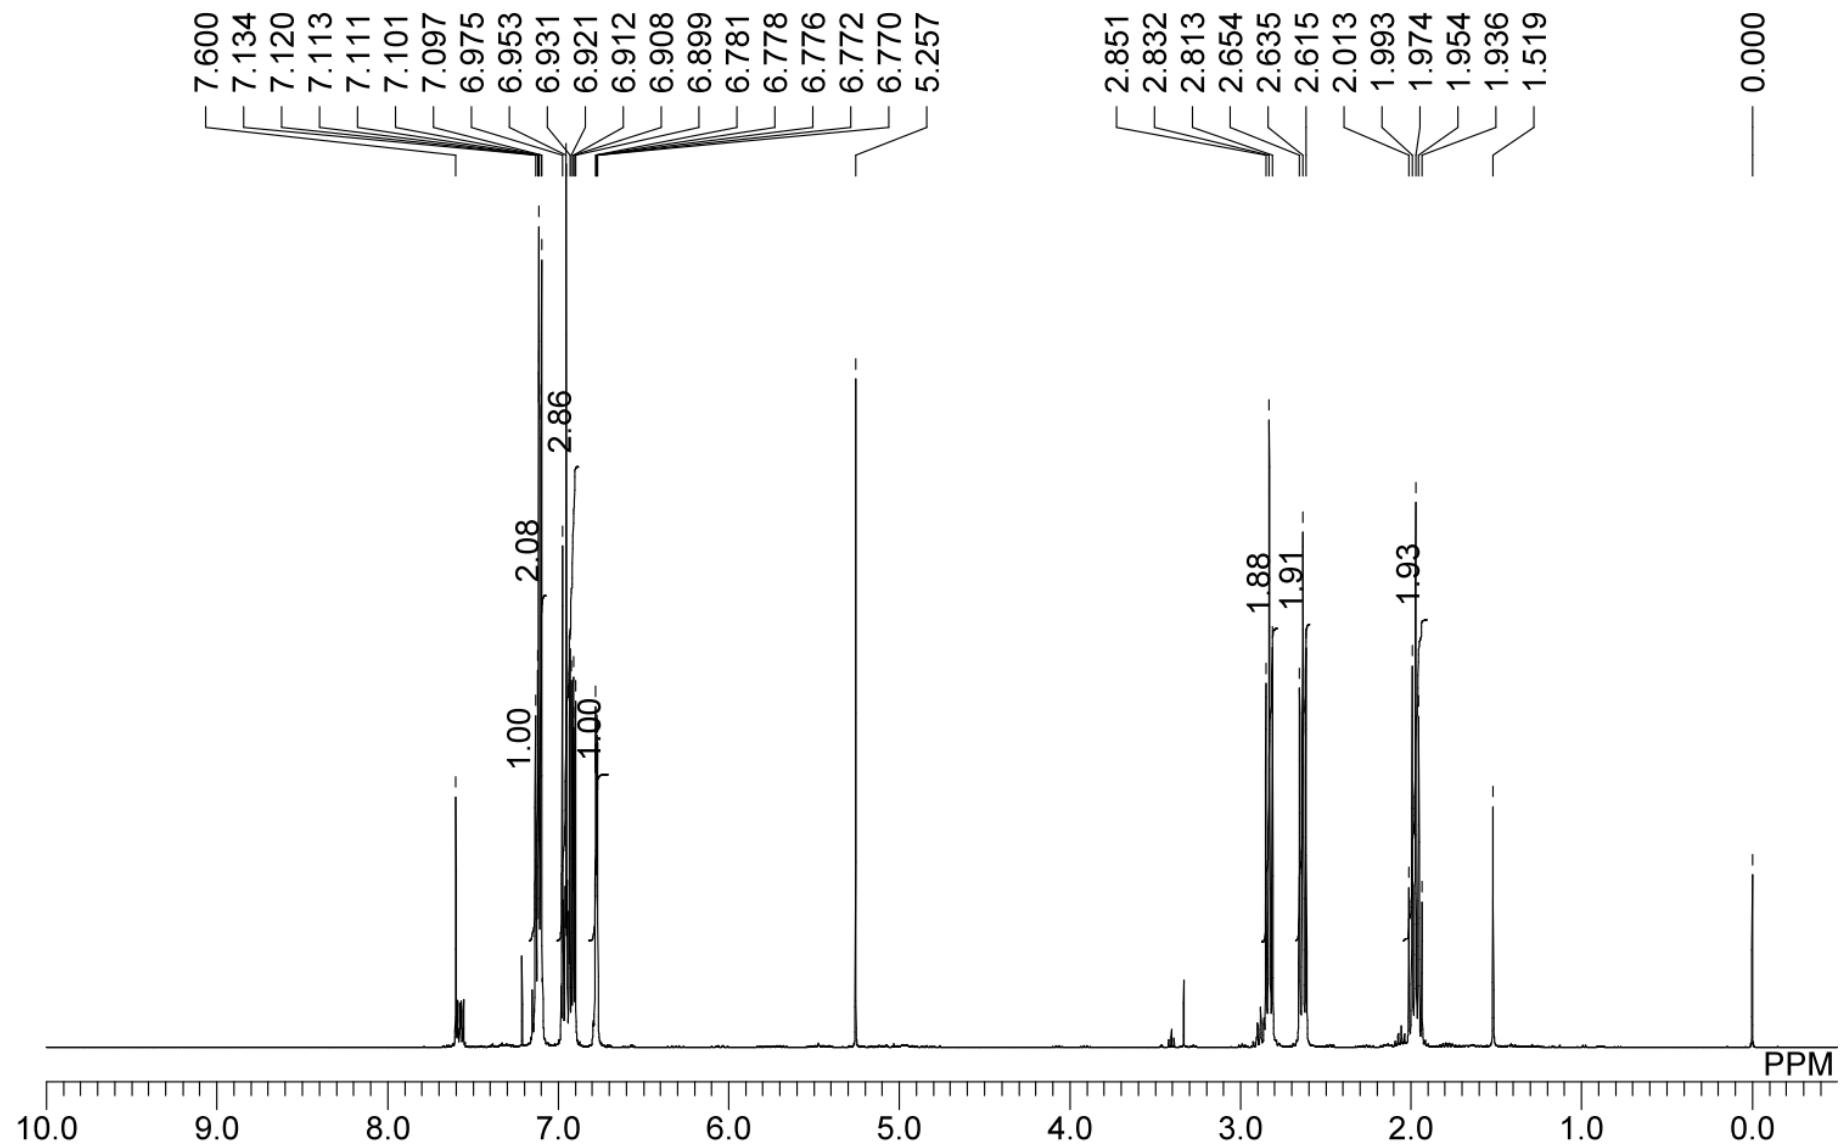

$^{13}\text{C}\{^1\text{H}\}$  NMR of **4da**

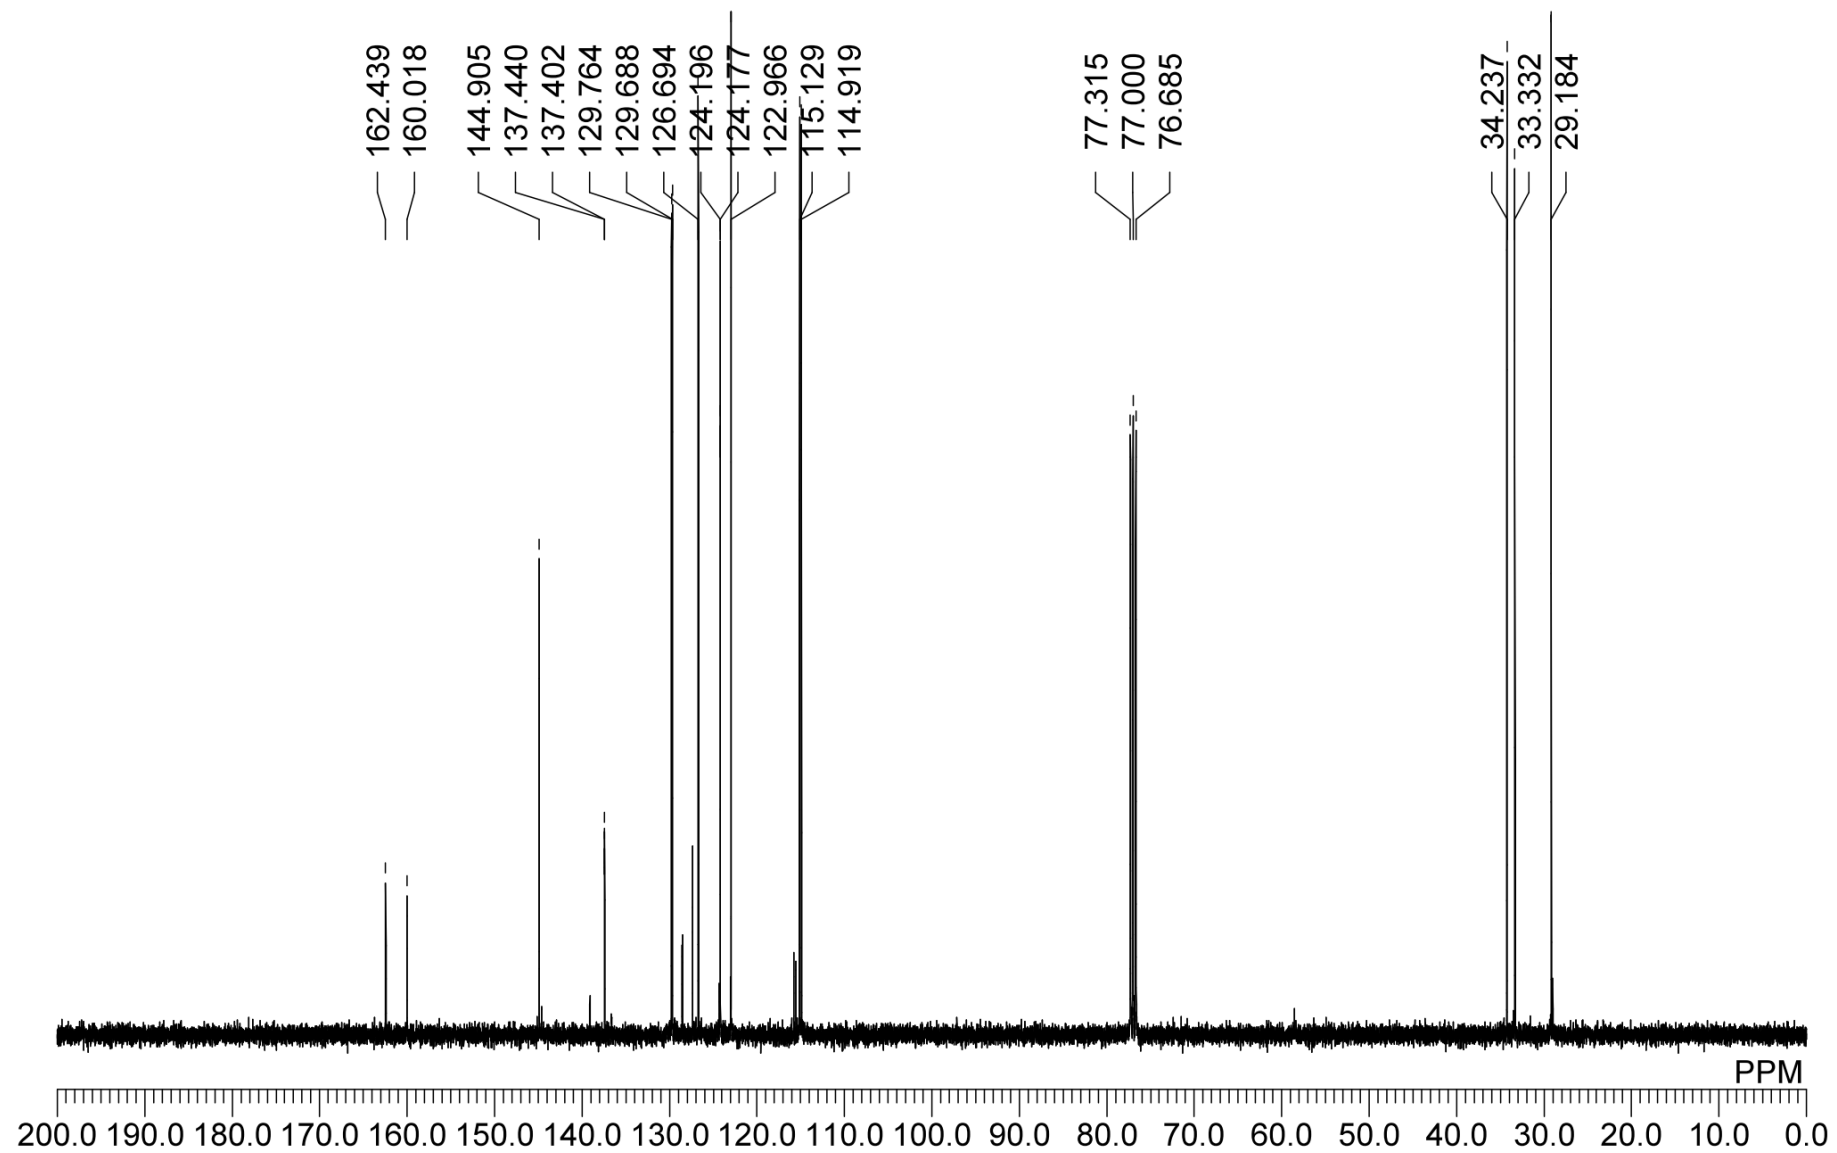



<sup>1</sup>H NMR of 4ea

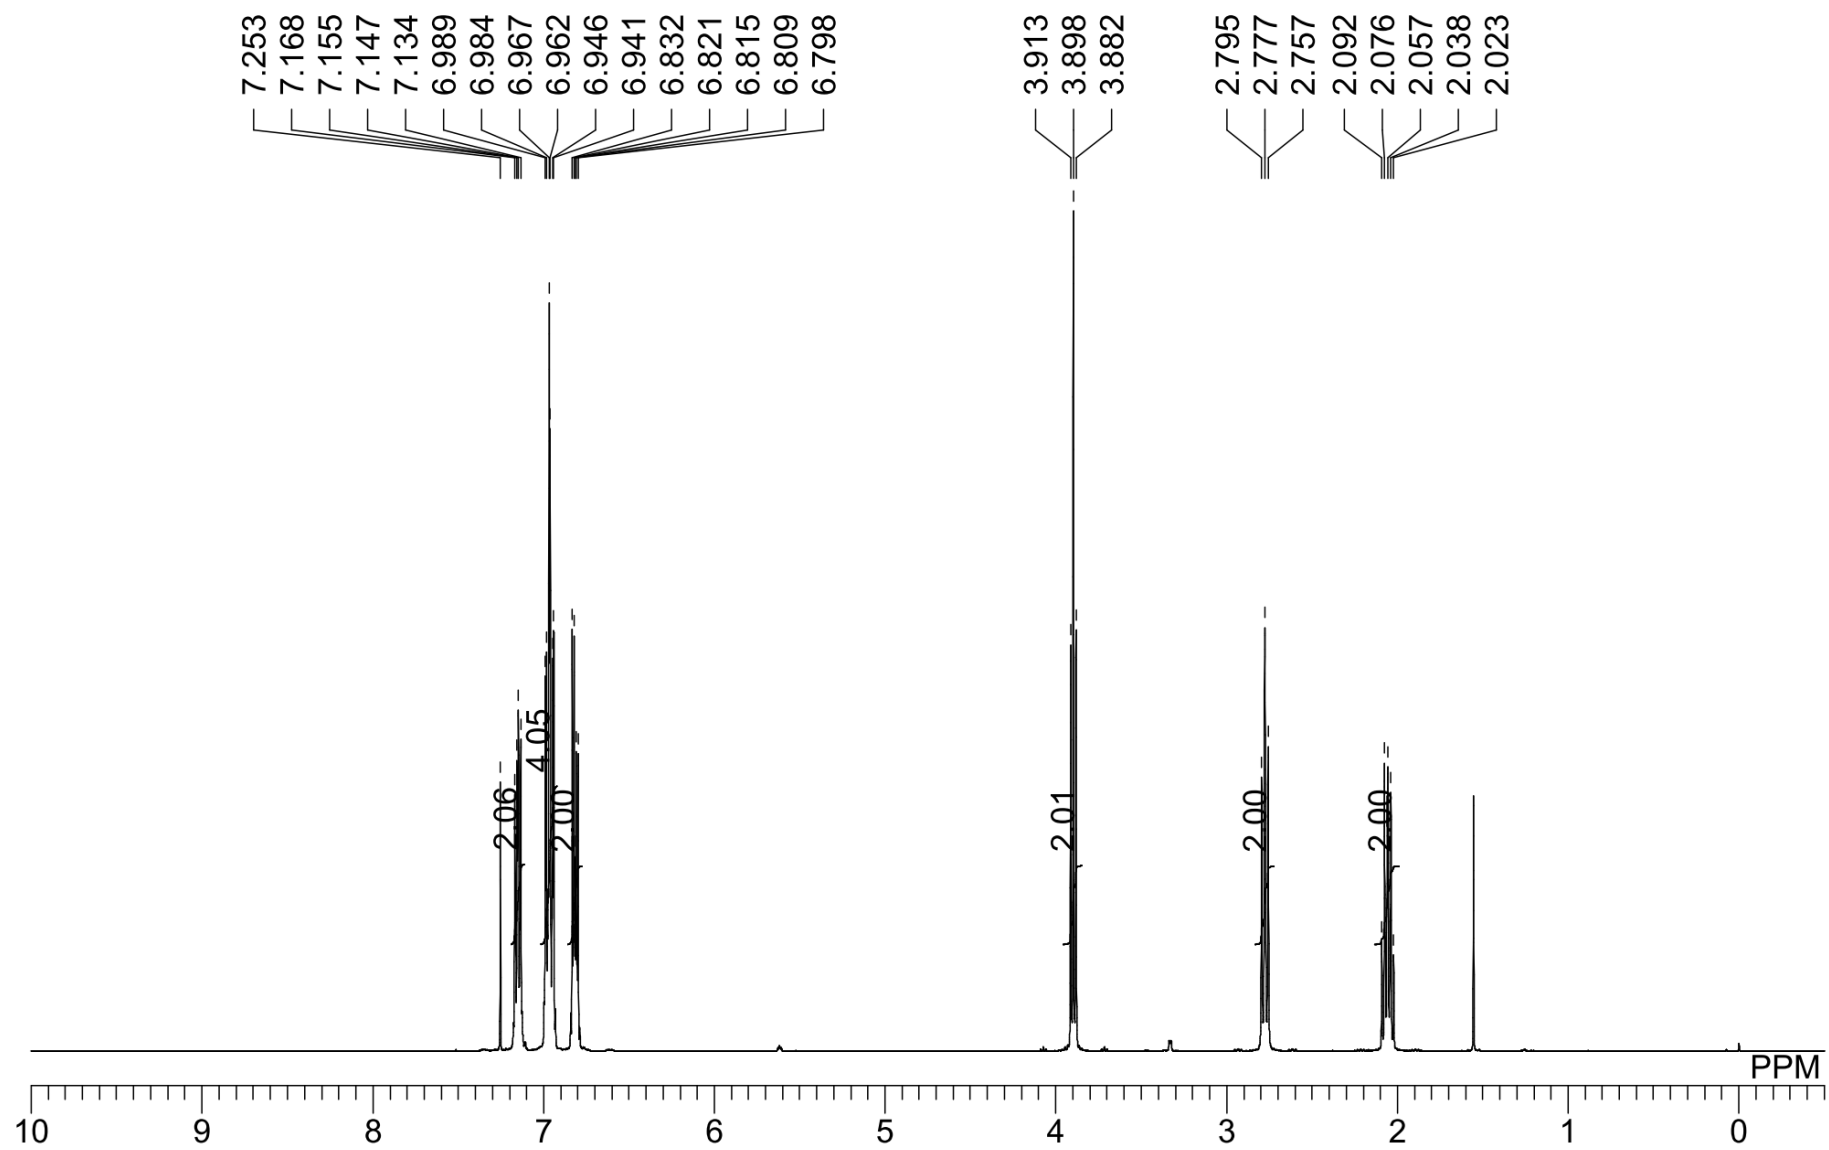

$^{13}\text{C}\{^1\text{H}\}$  NMR of **4ea**

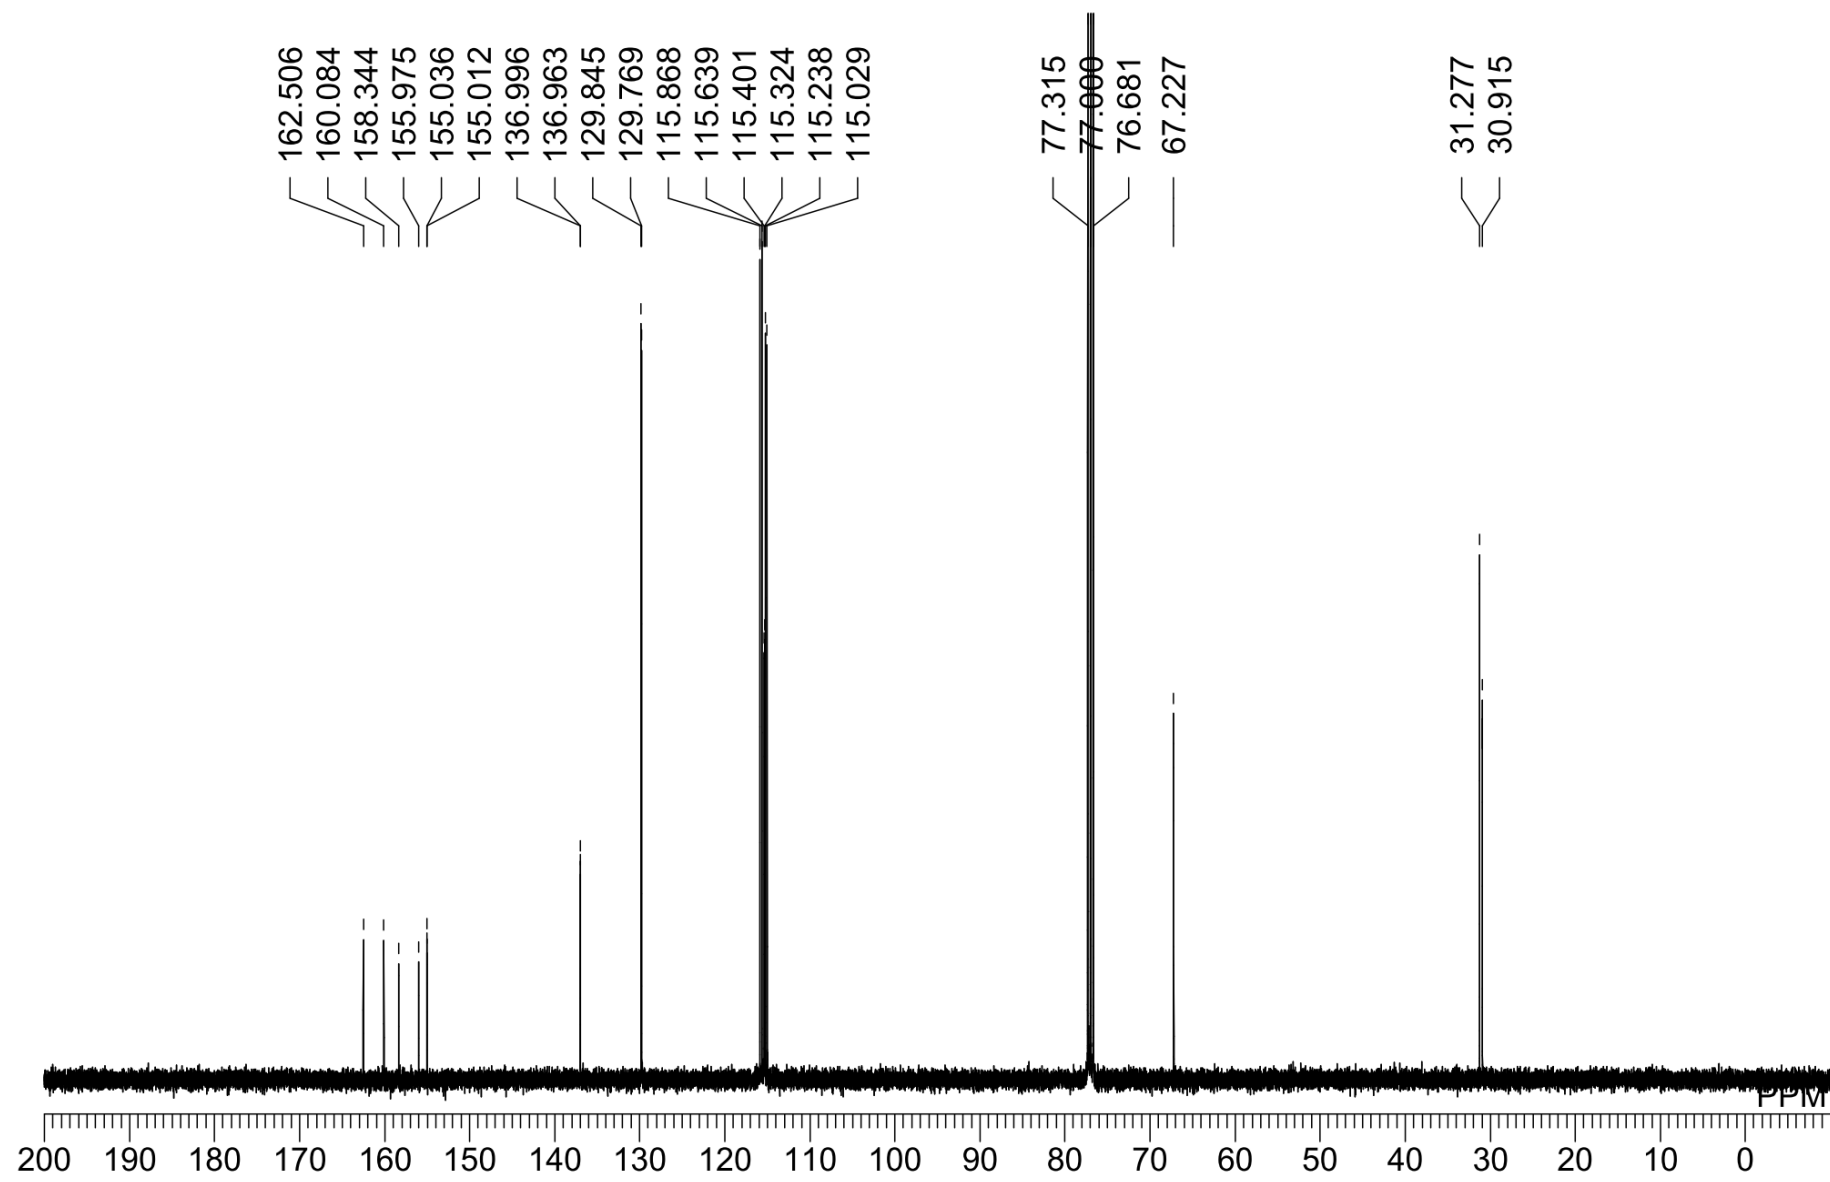

<sup>1</sup>H NMR of **4fa**

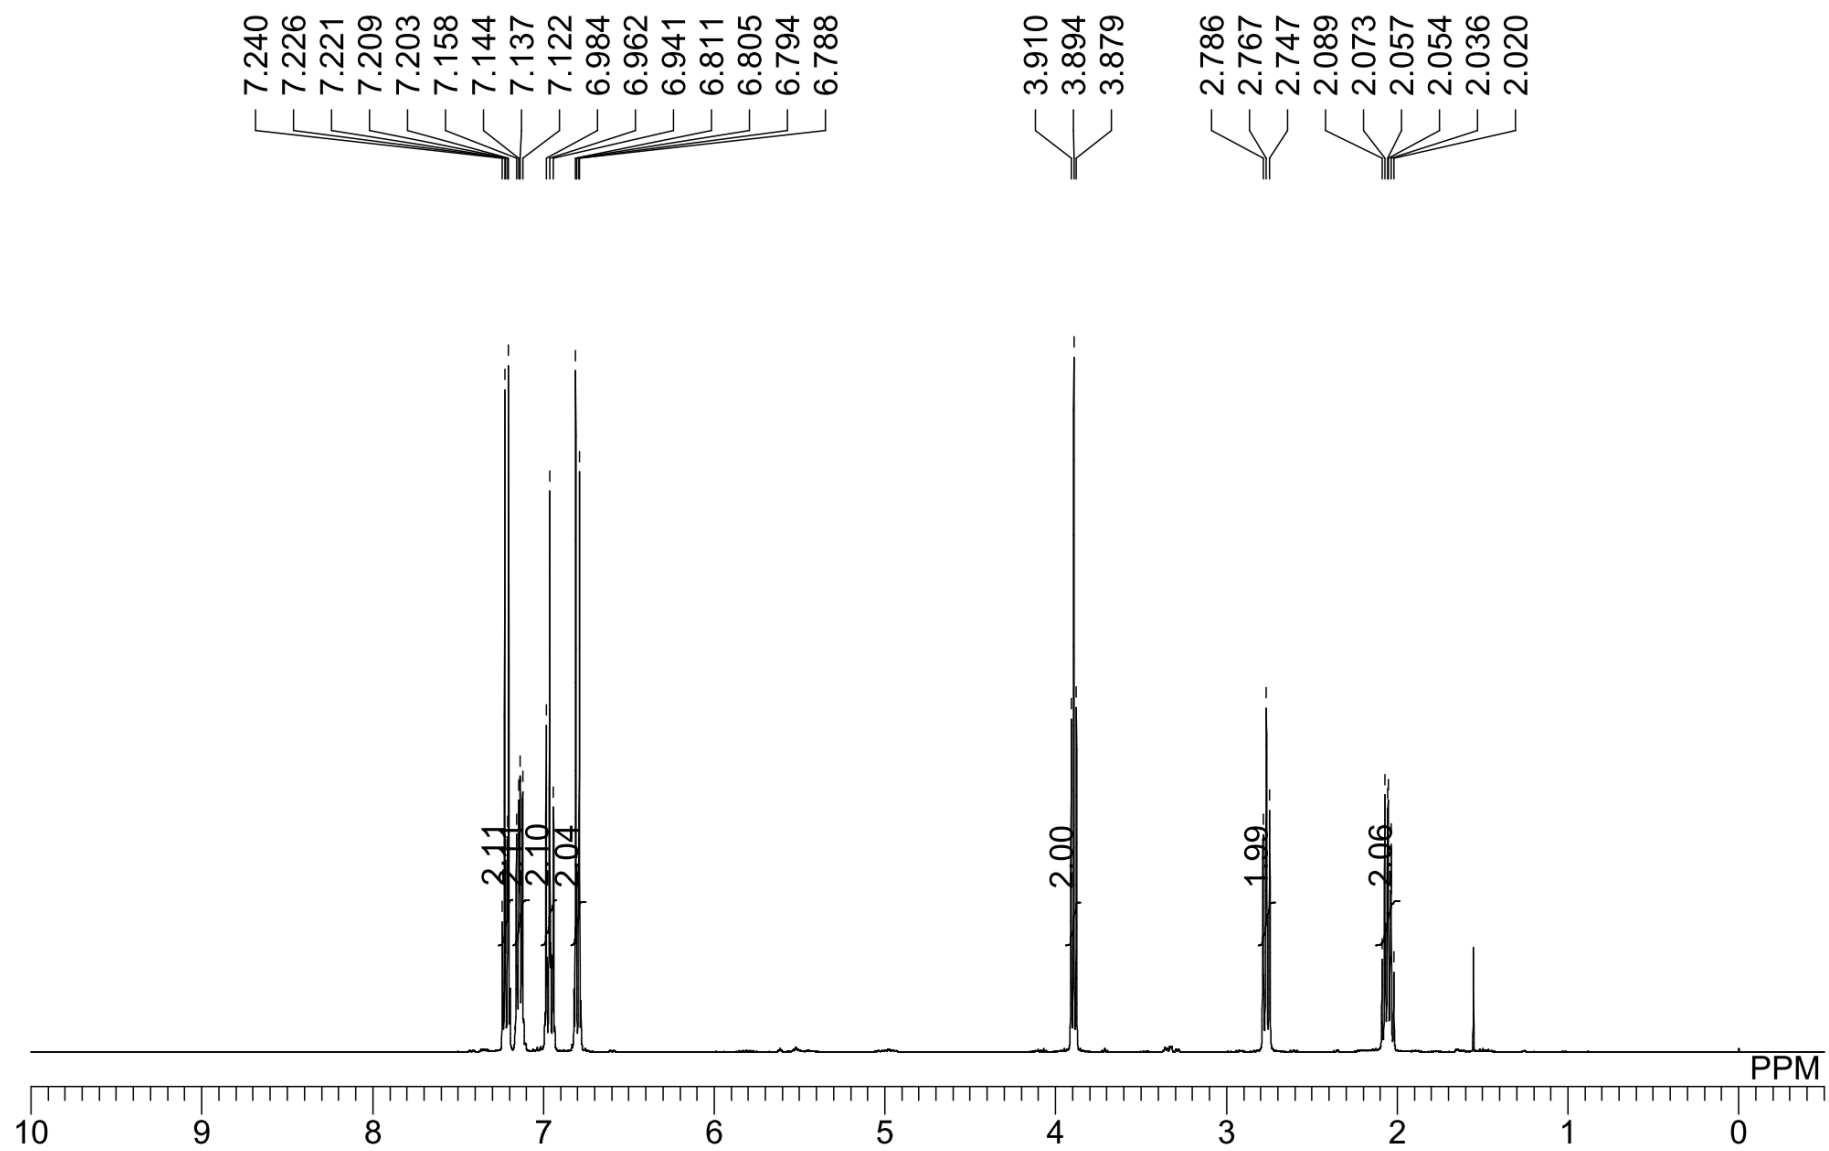

$^{13}\text{C}\{^1\text{H}\}$  NMR of **4fa**

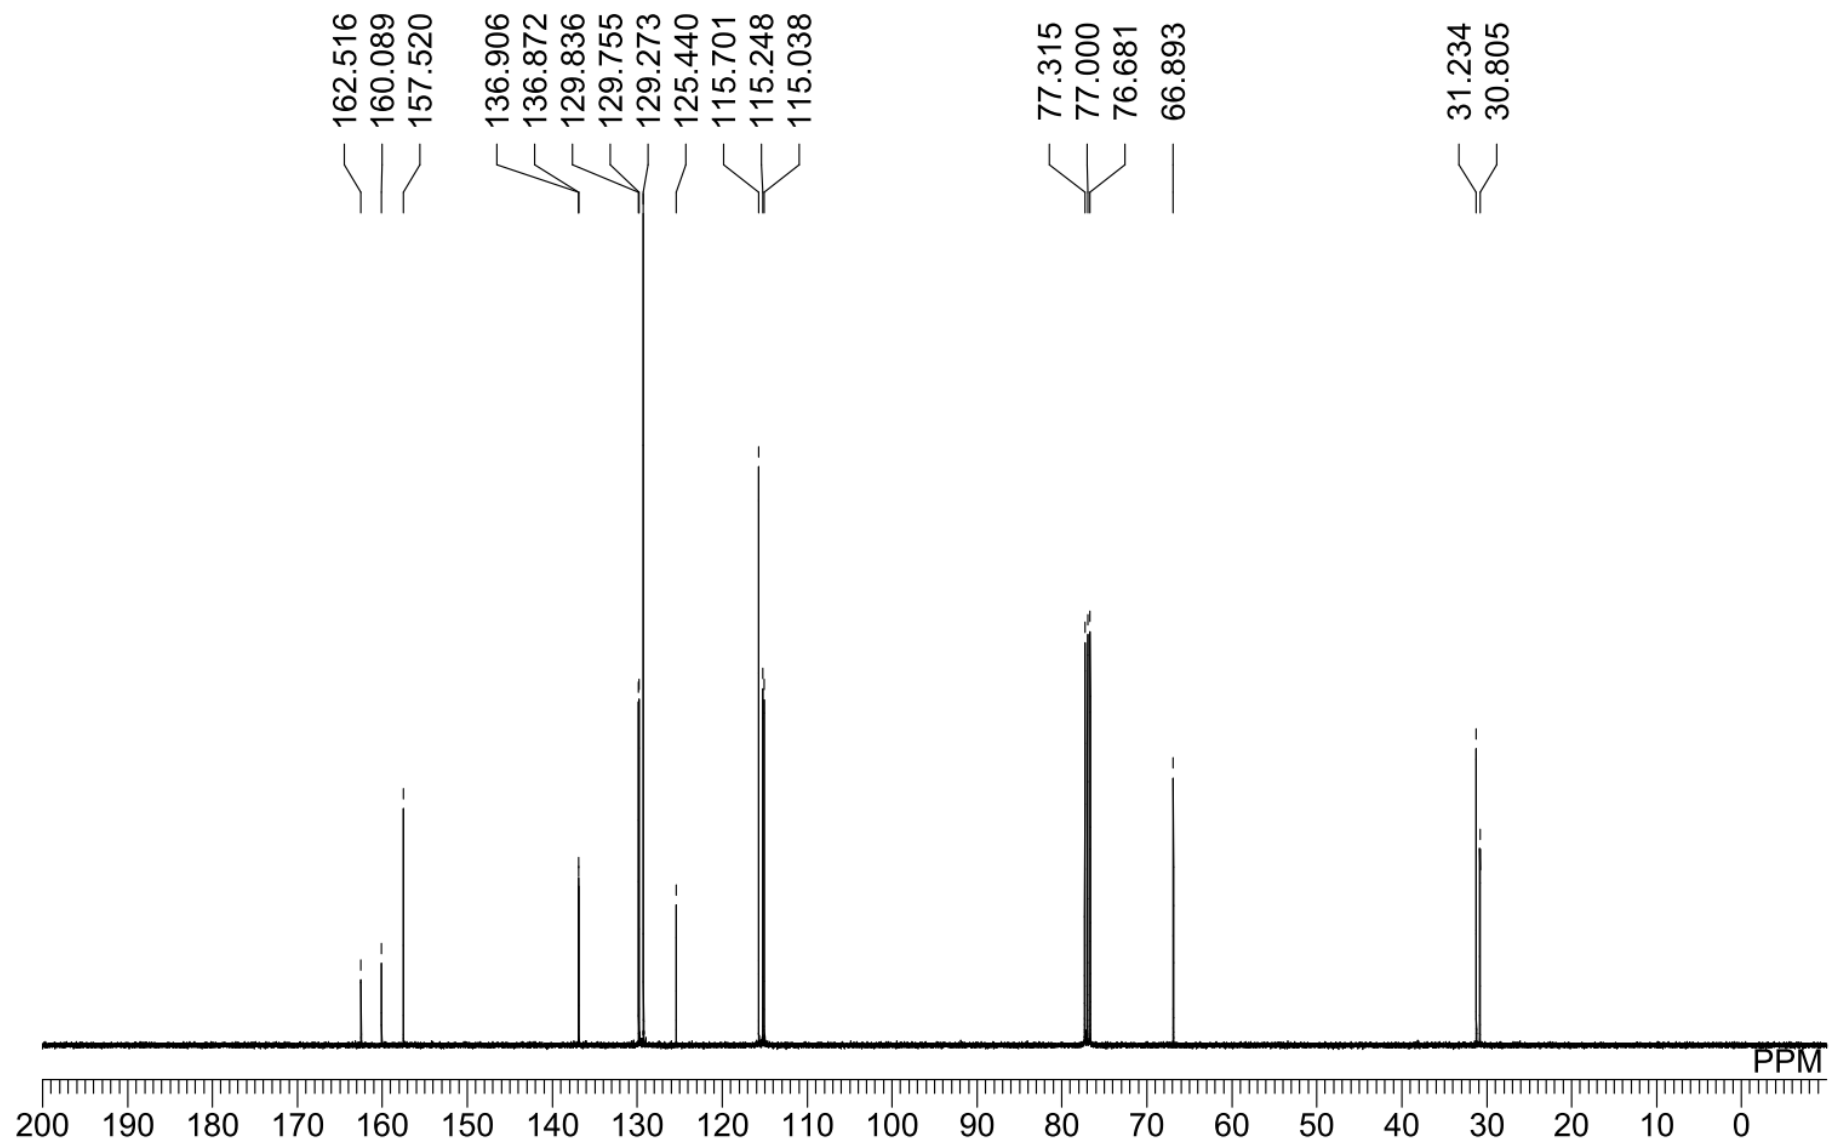

<sup>1</sup>H NMR of **4ga**

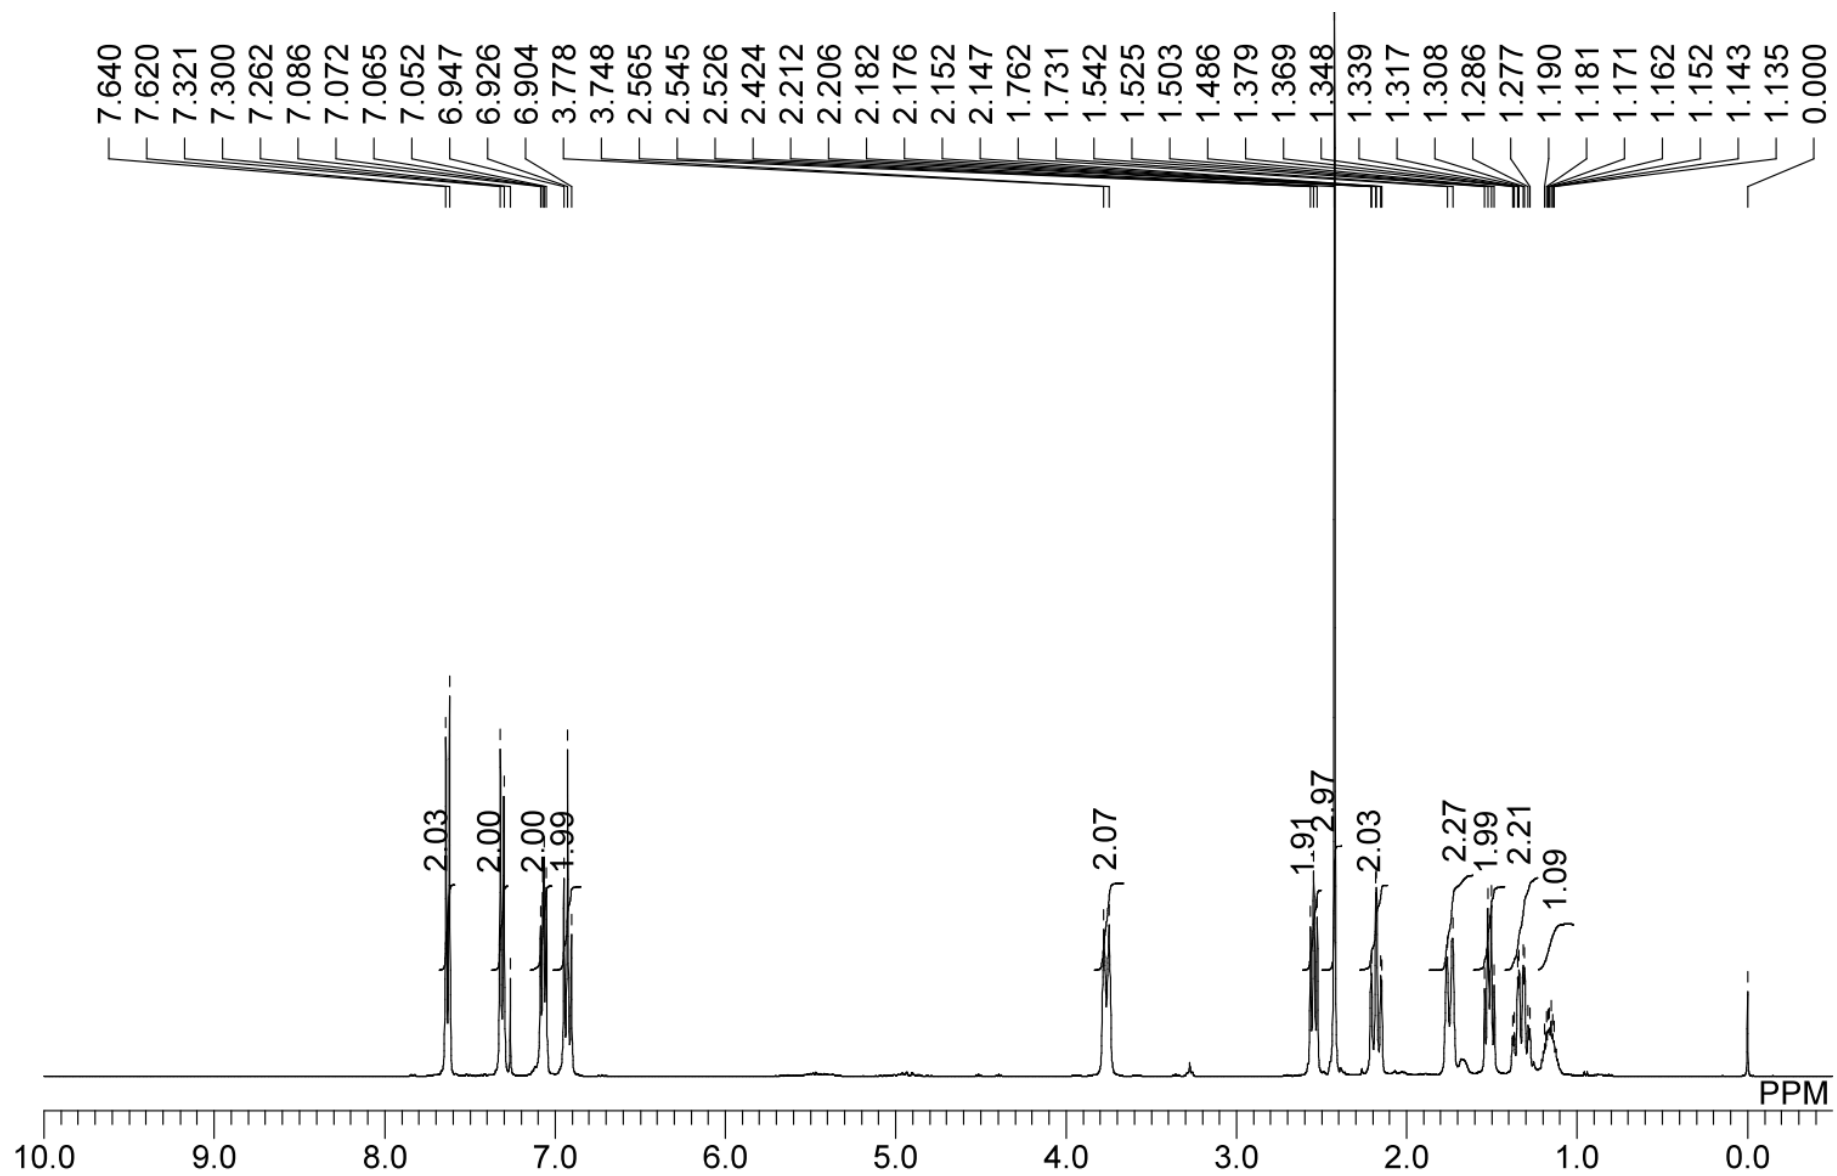

$^{13}\text{C}\{^1\text{H}\}$  NMR of **4ga**

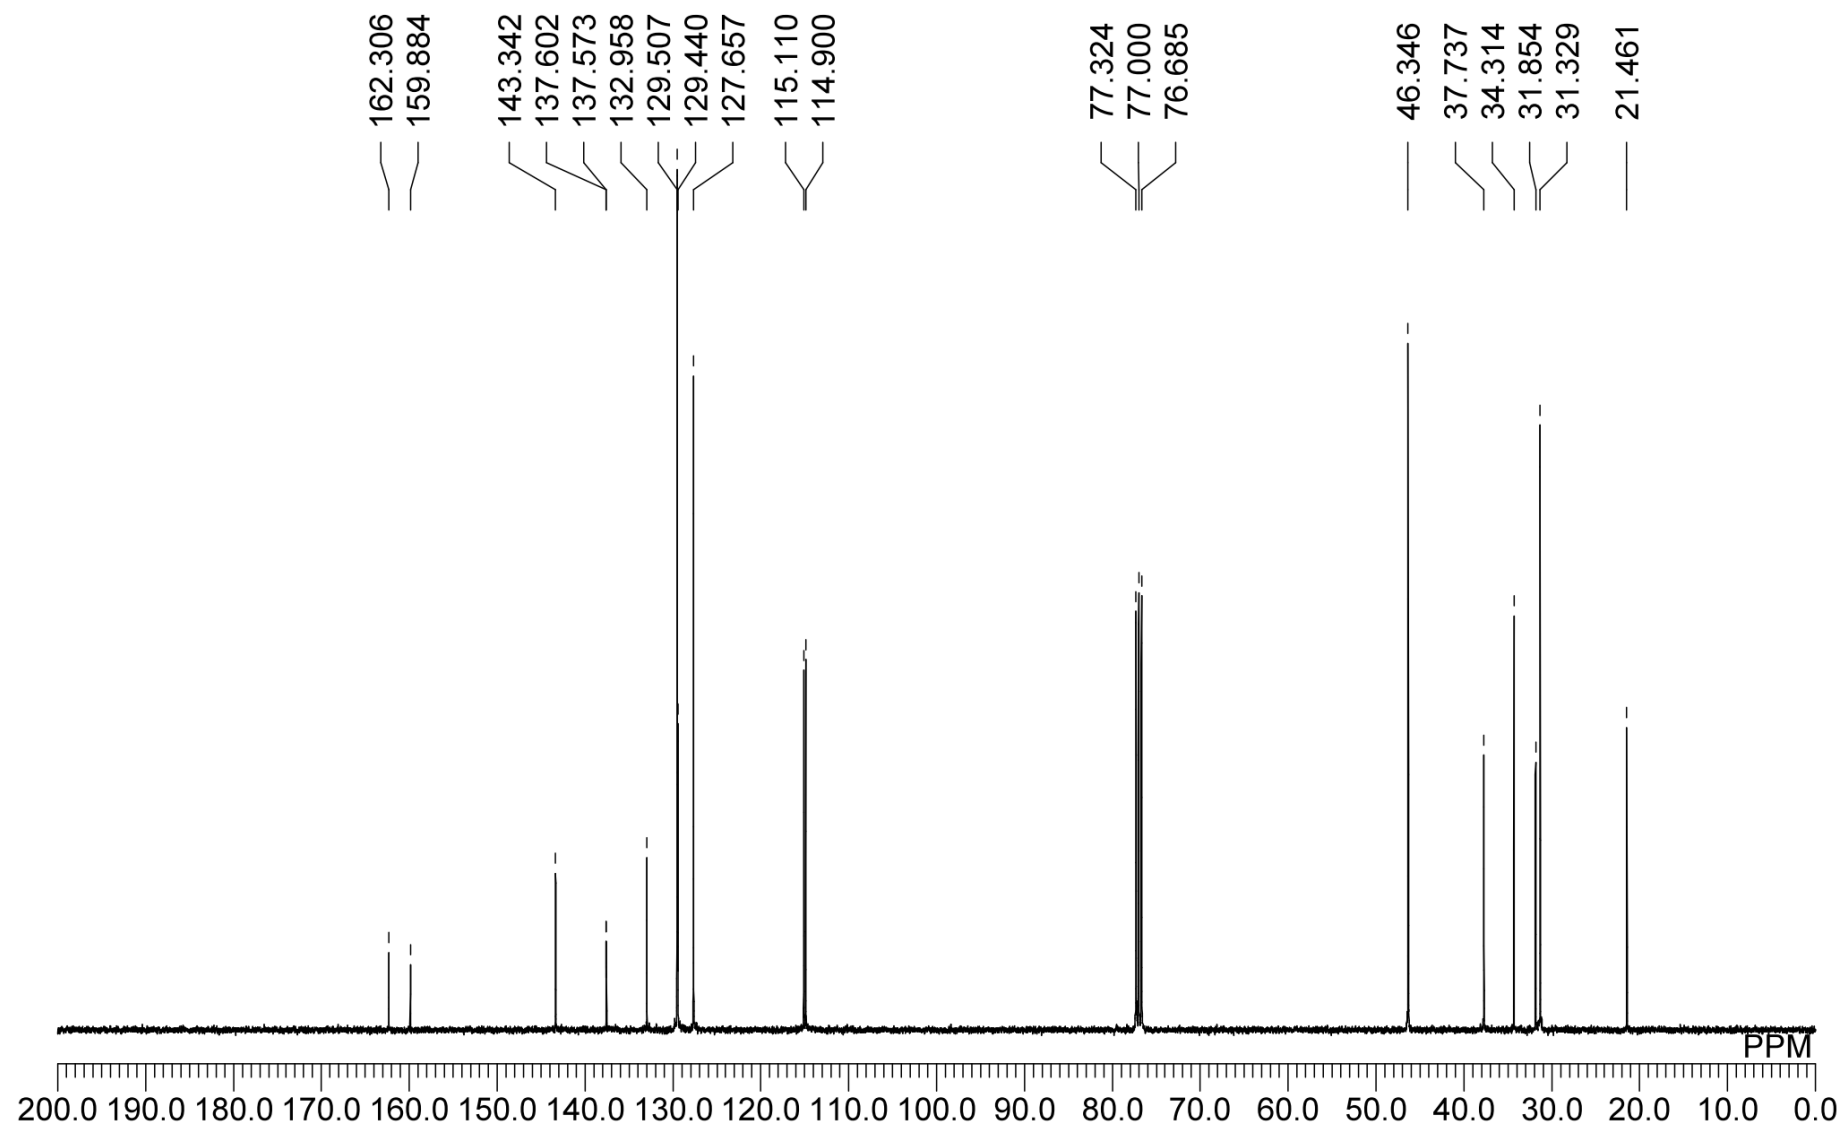

<sup>1</sup>H NMR of 4ha

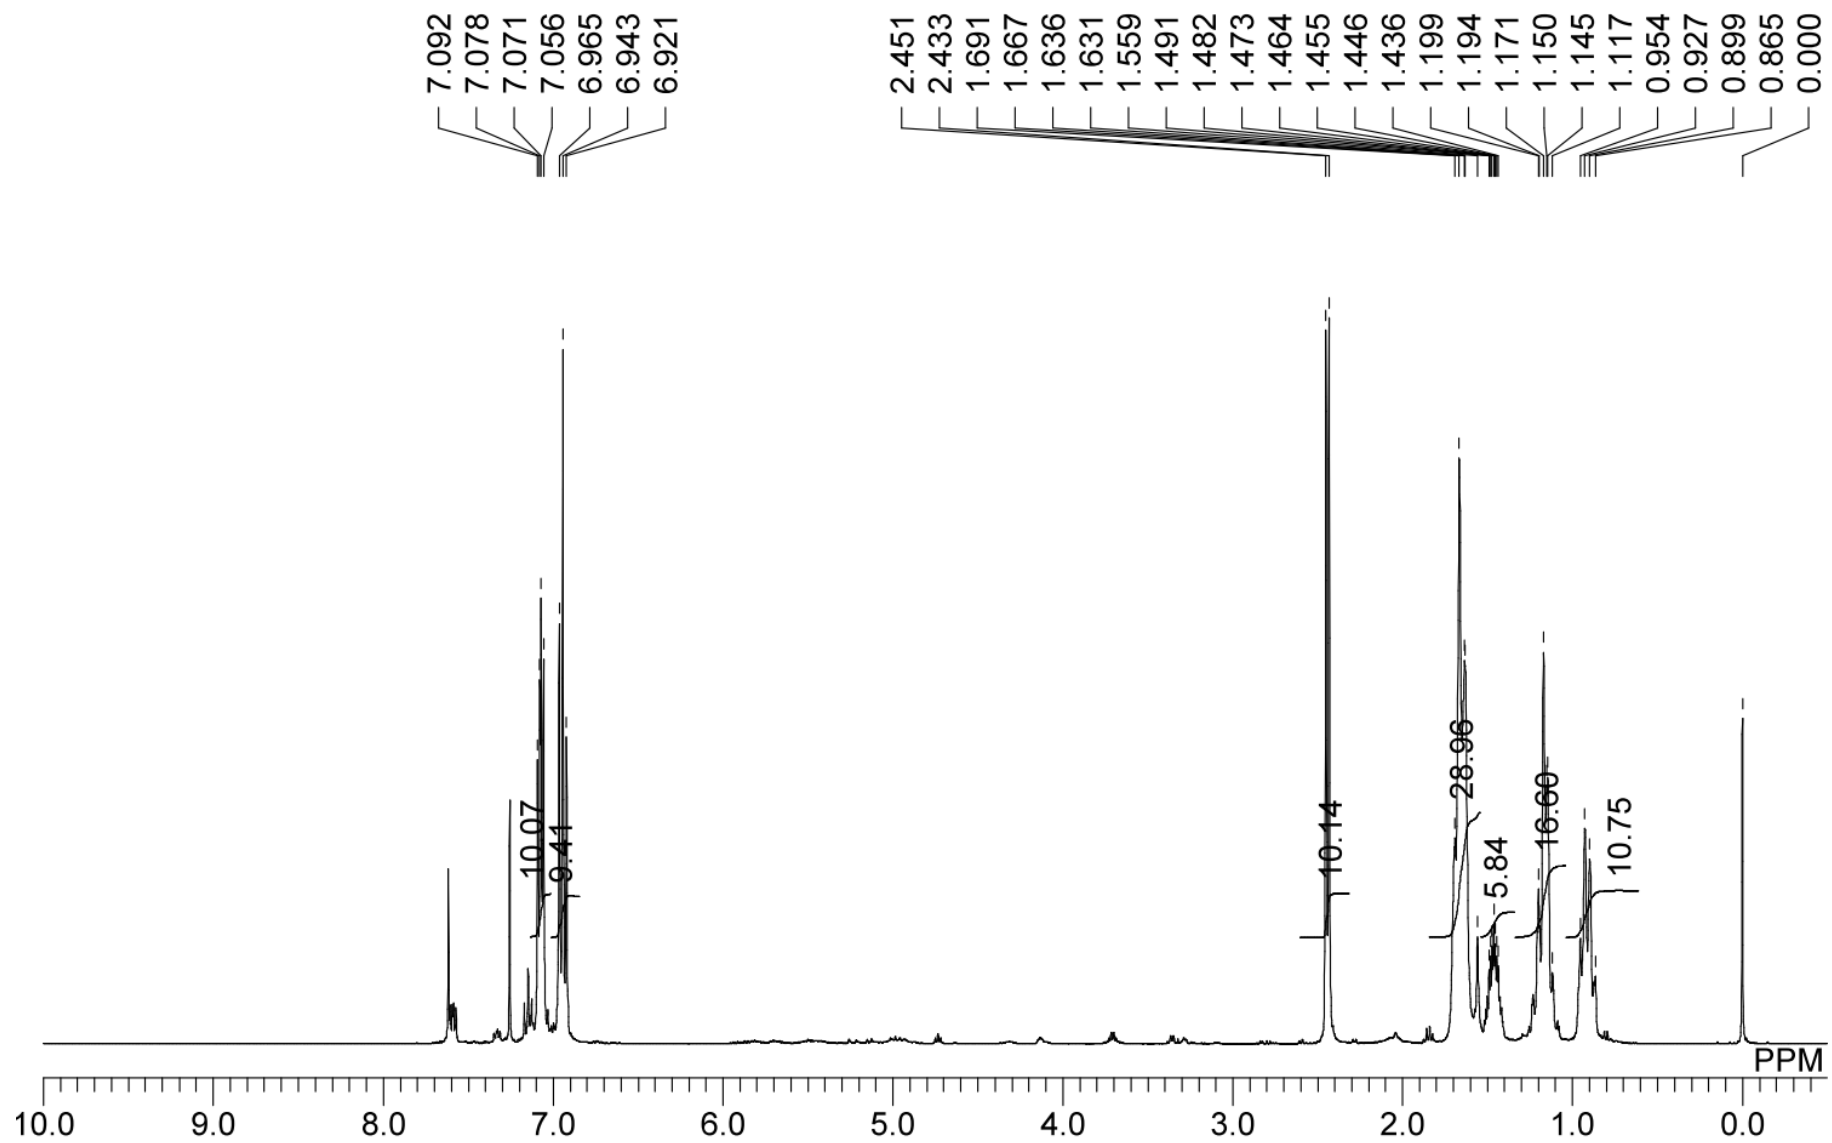

$^{13}\text{C}\{^1\text{H}\}$  NMR of **4ha**

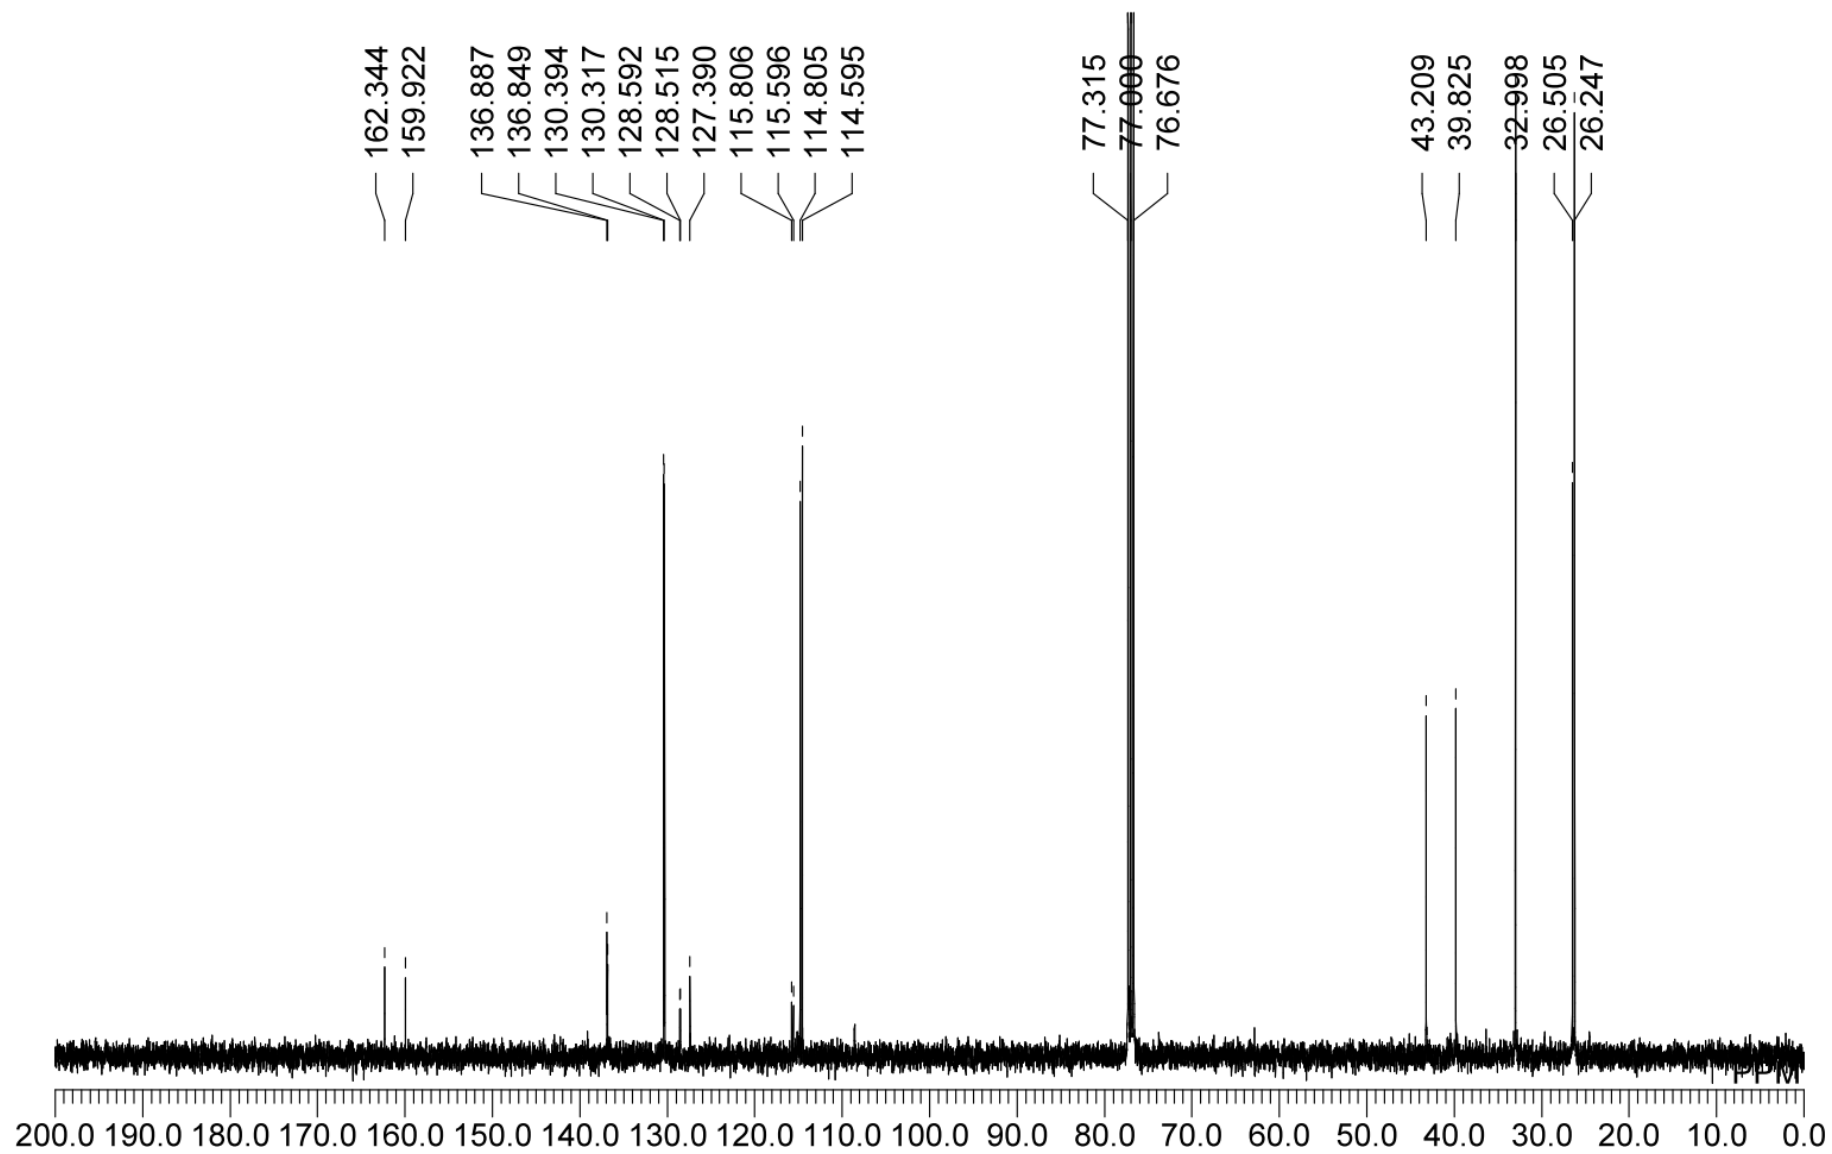



<sup>1</sup>H NMR of 4gb

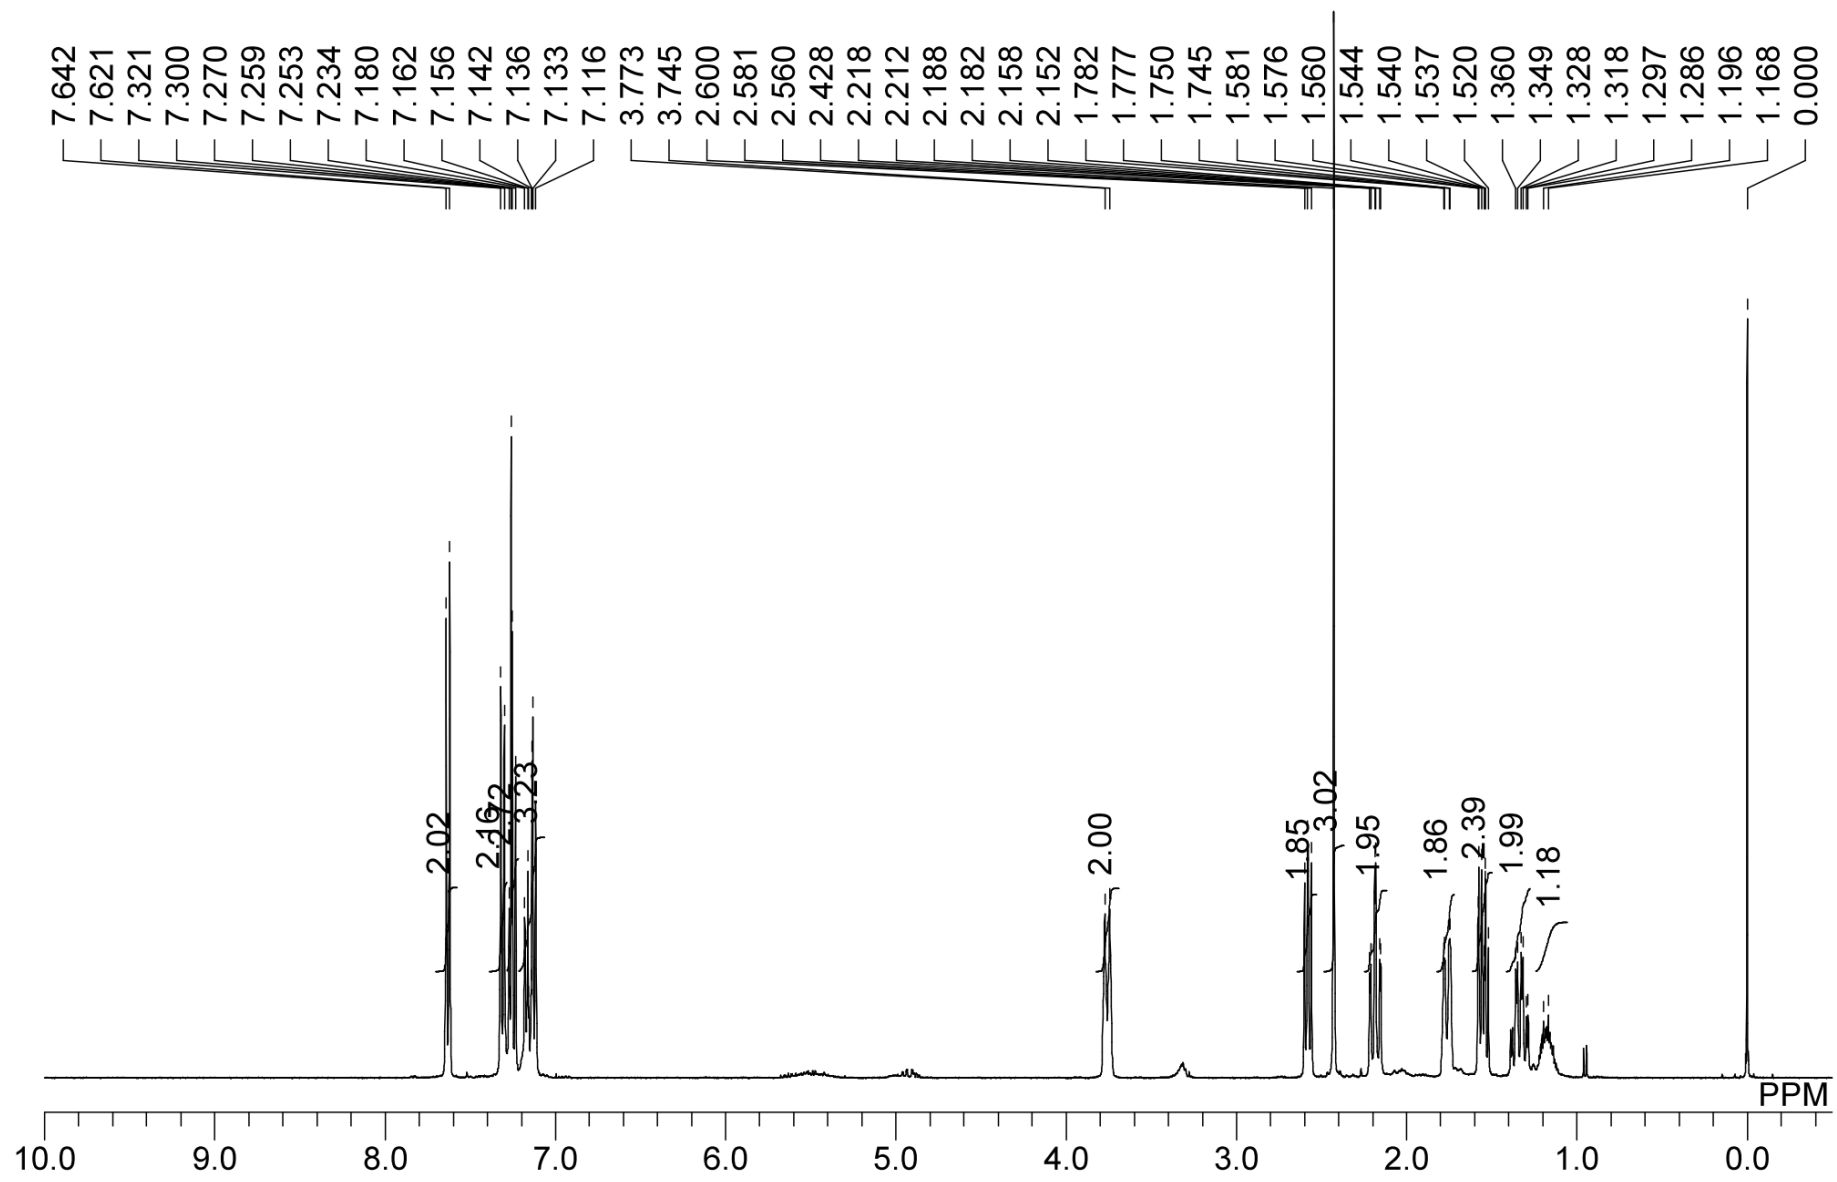

$^{13}\text{C}\{^1\text{H}\}$  NMR of **4gb**

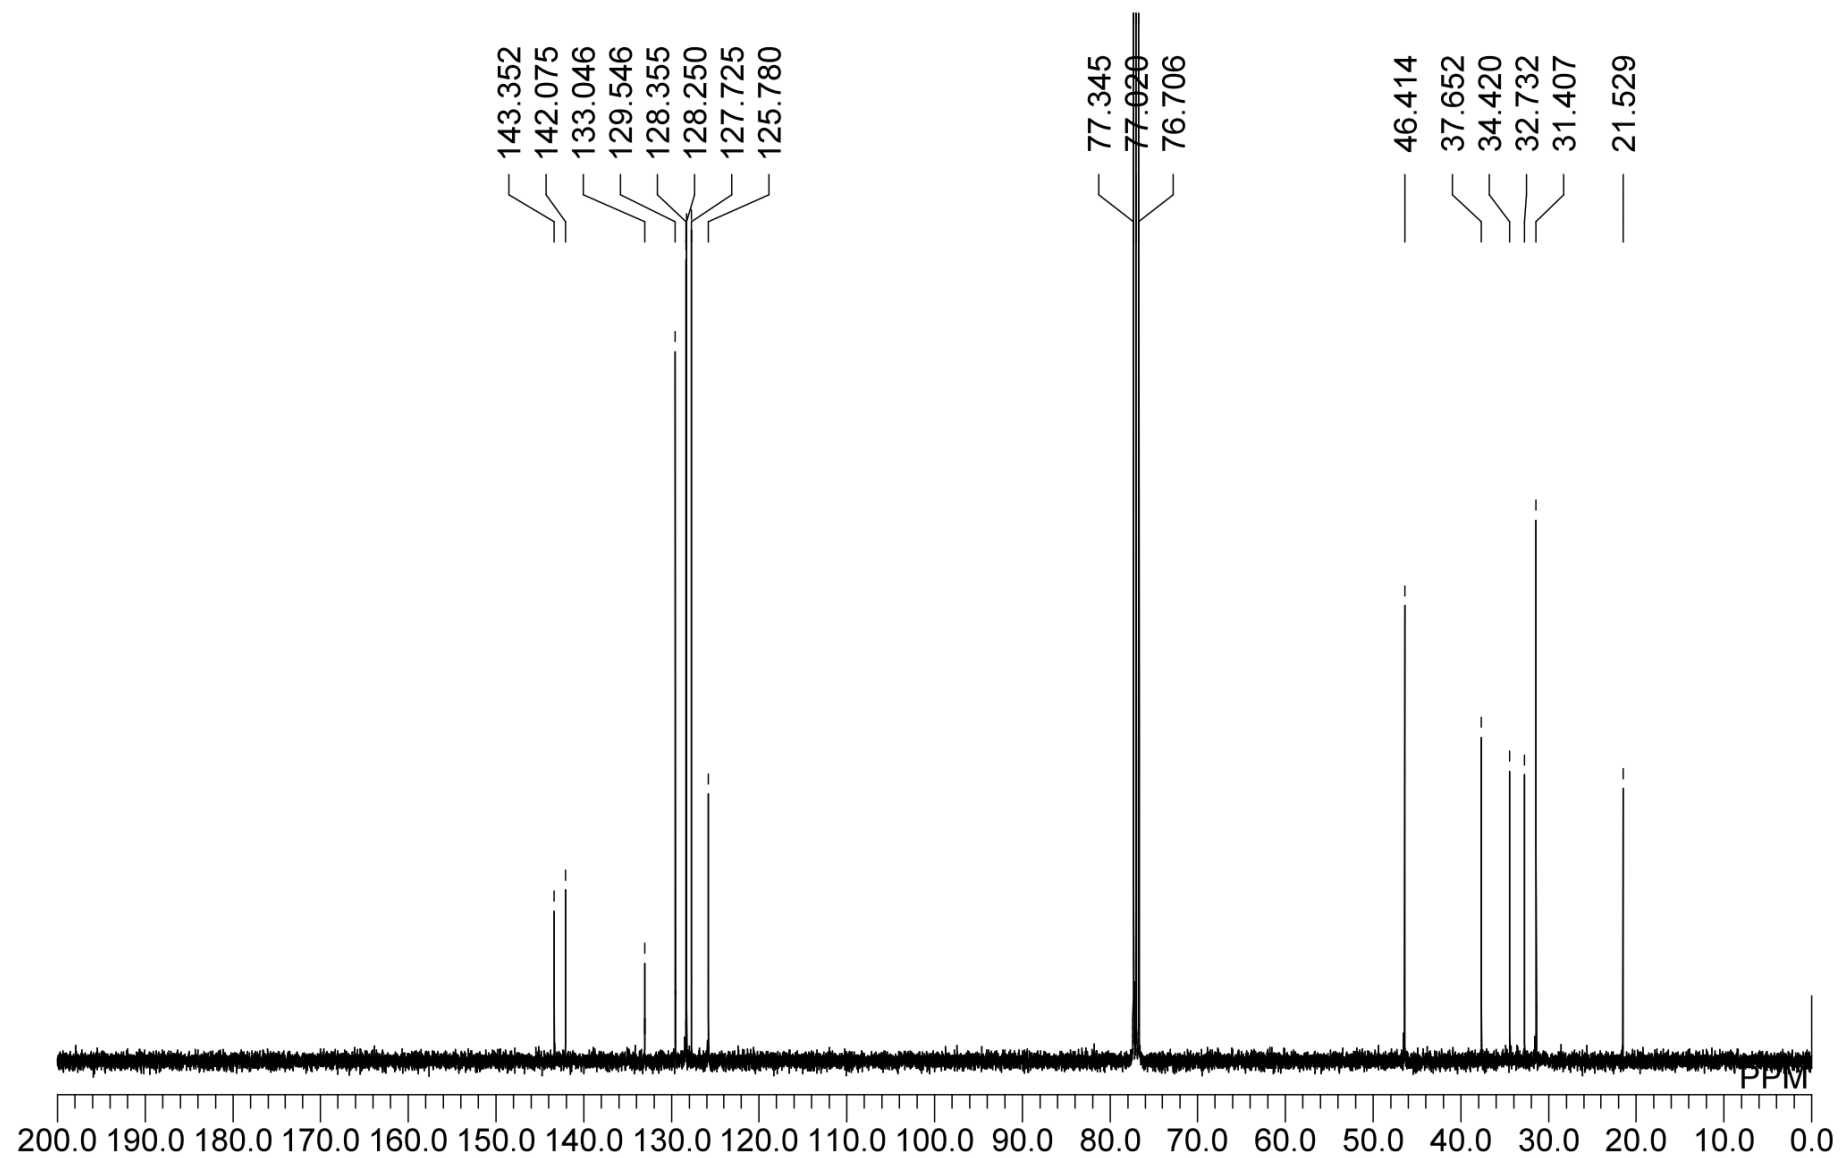

<sup>1</sup>H NMR of 4gc

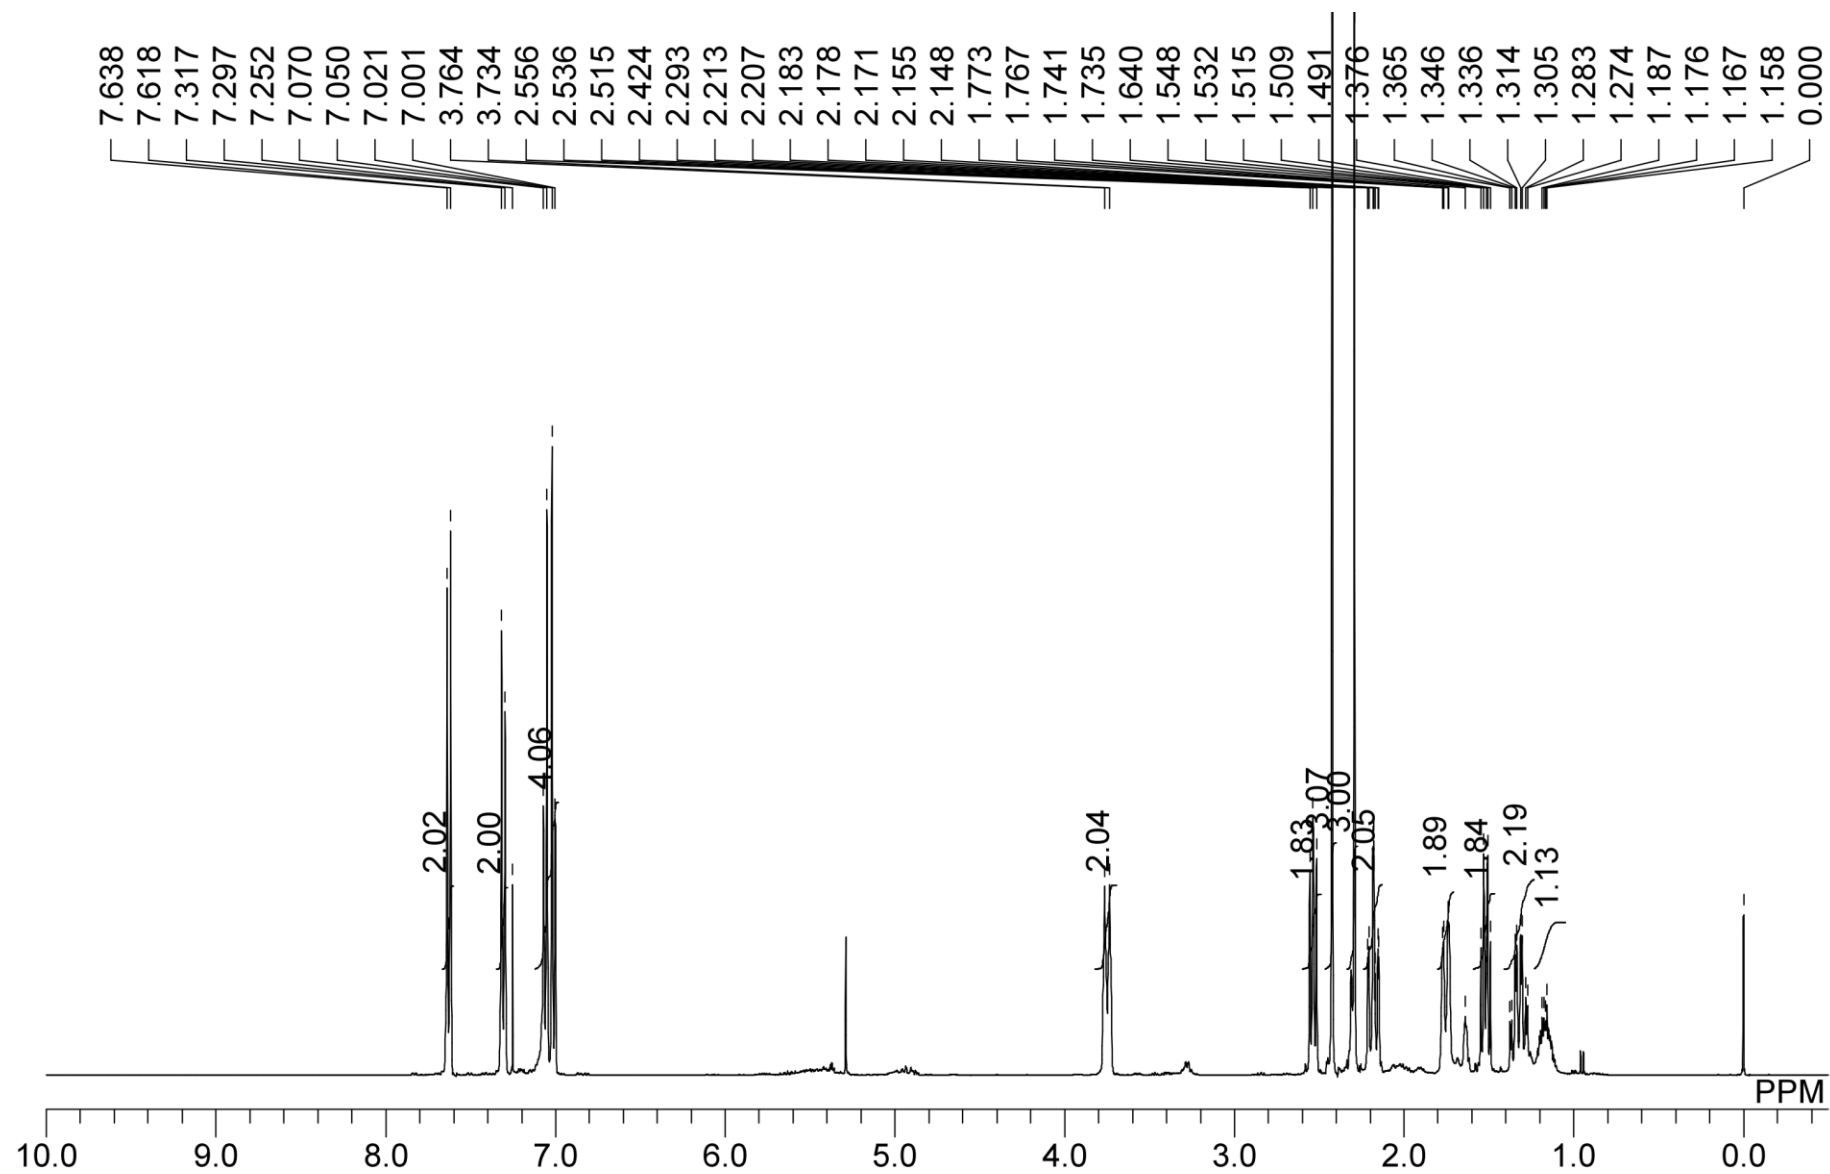

$^{13}\text{C}\{^1\text{H}\}$  NMR of **4gc**

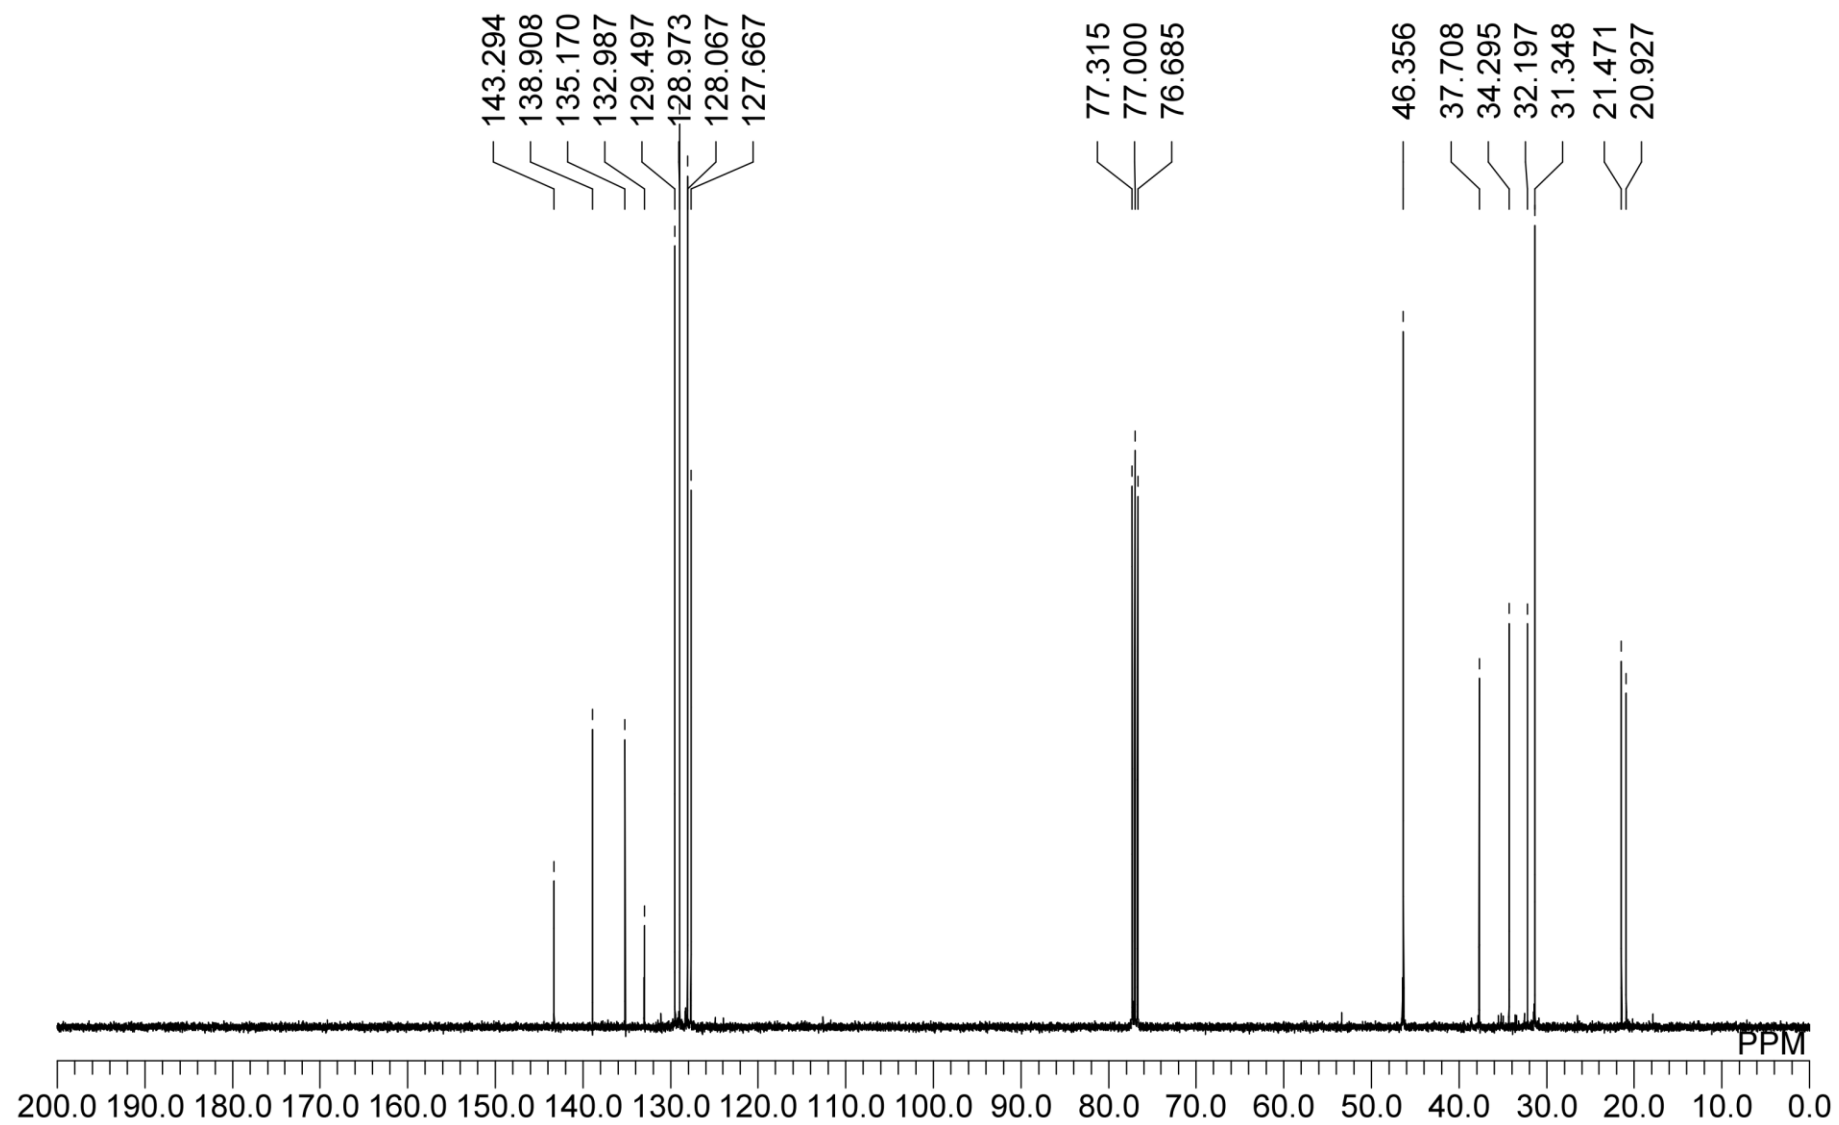

<sup>1</sup>H NMR of 4gg

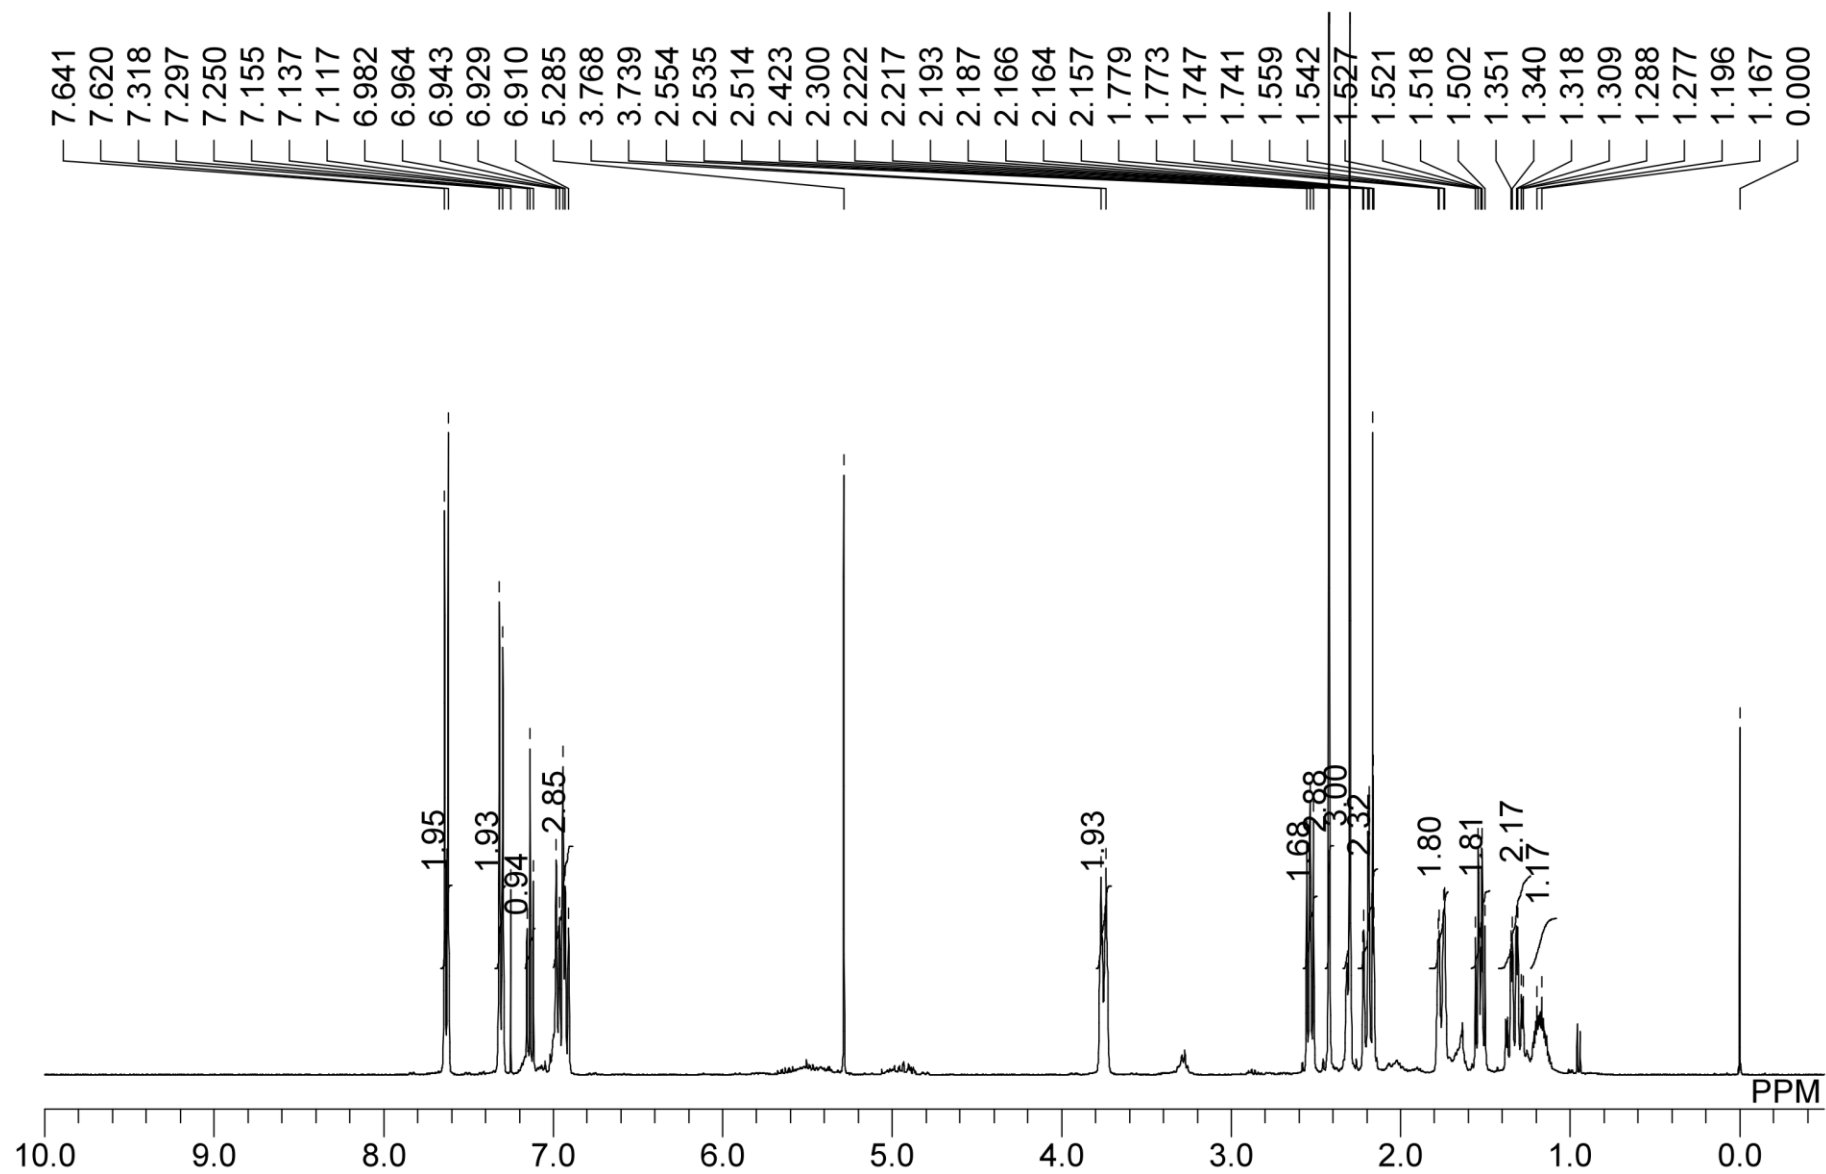

$^{13}\text{C}\{^1\text{H}\}$  NMR of **4gg**

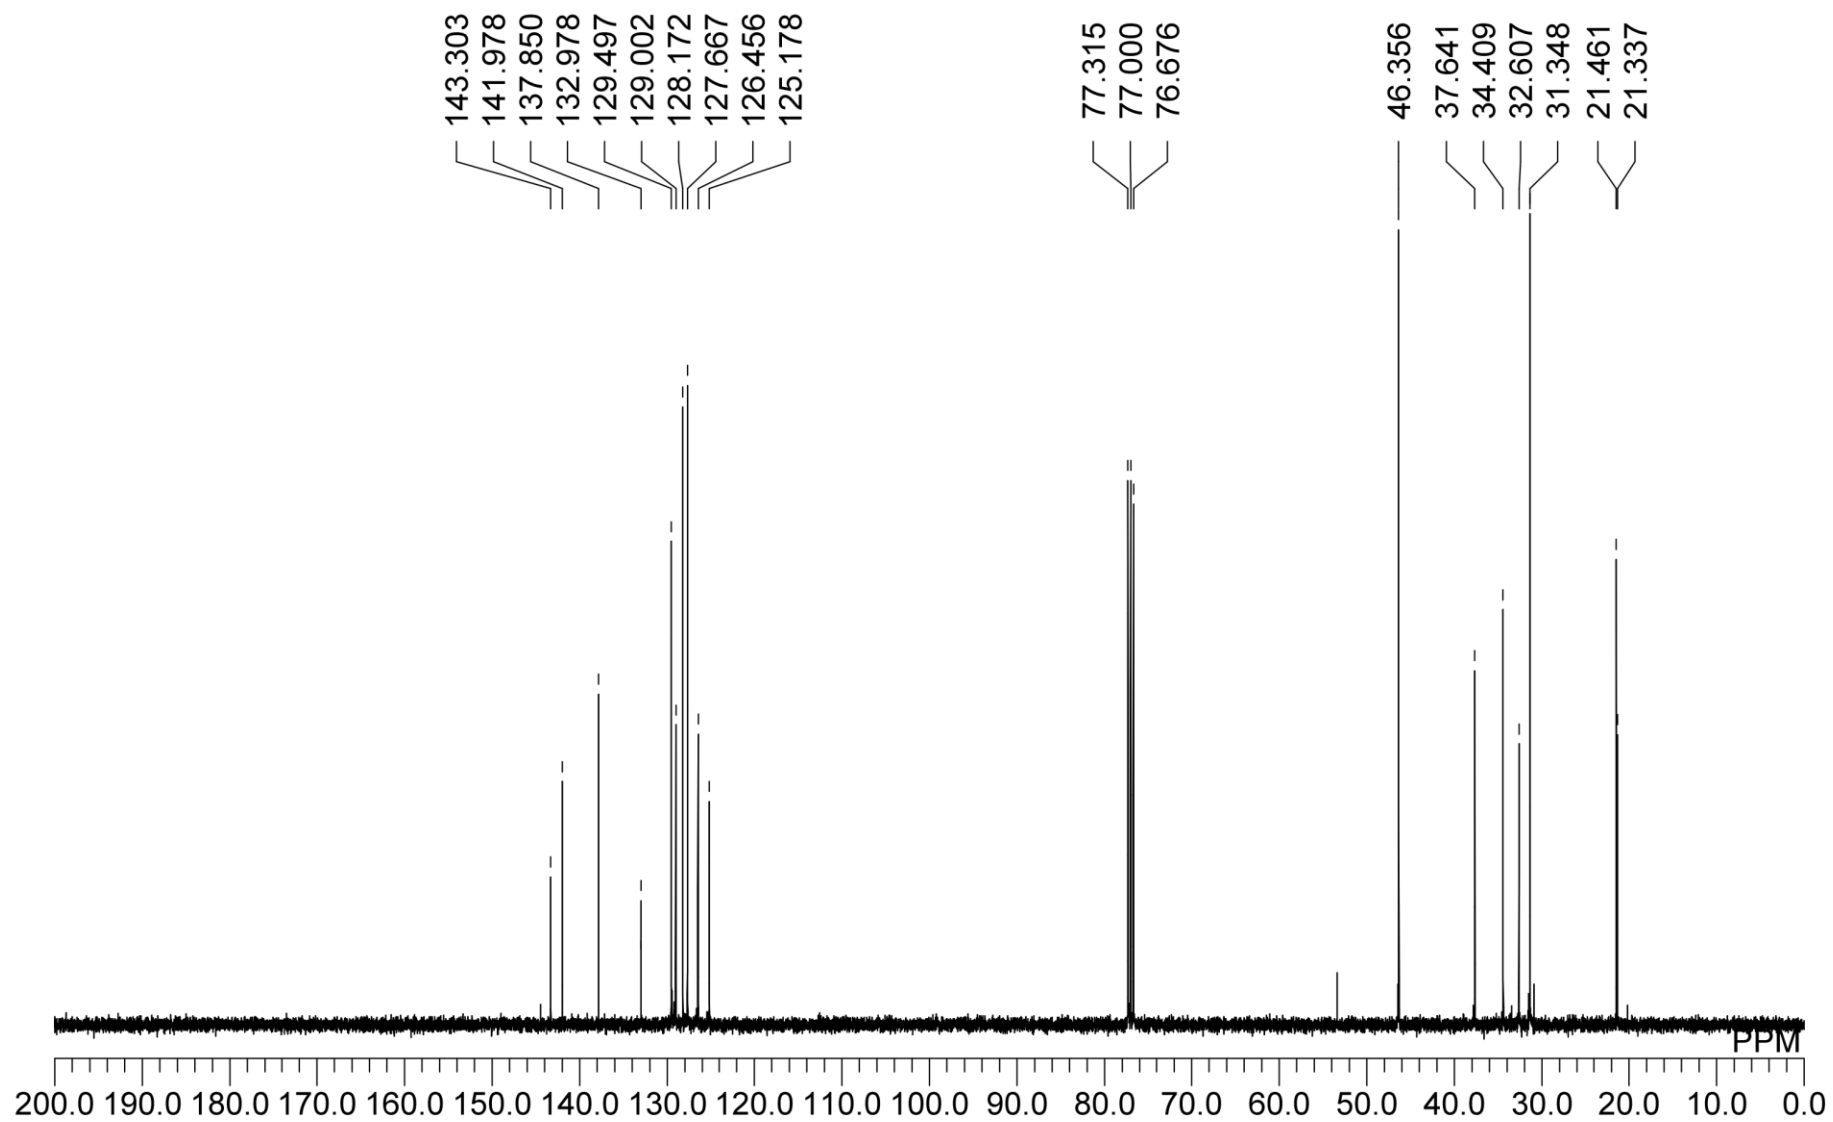

<sup>1</sup>H NMR of 4gi

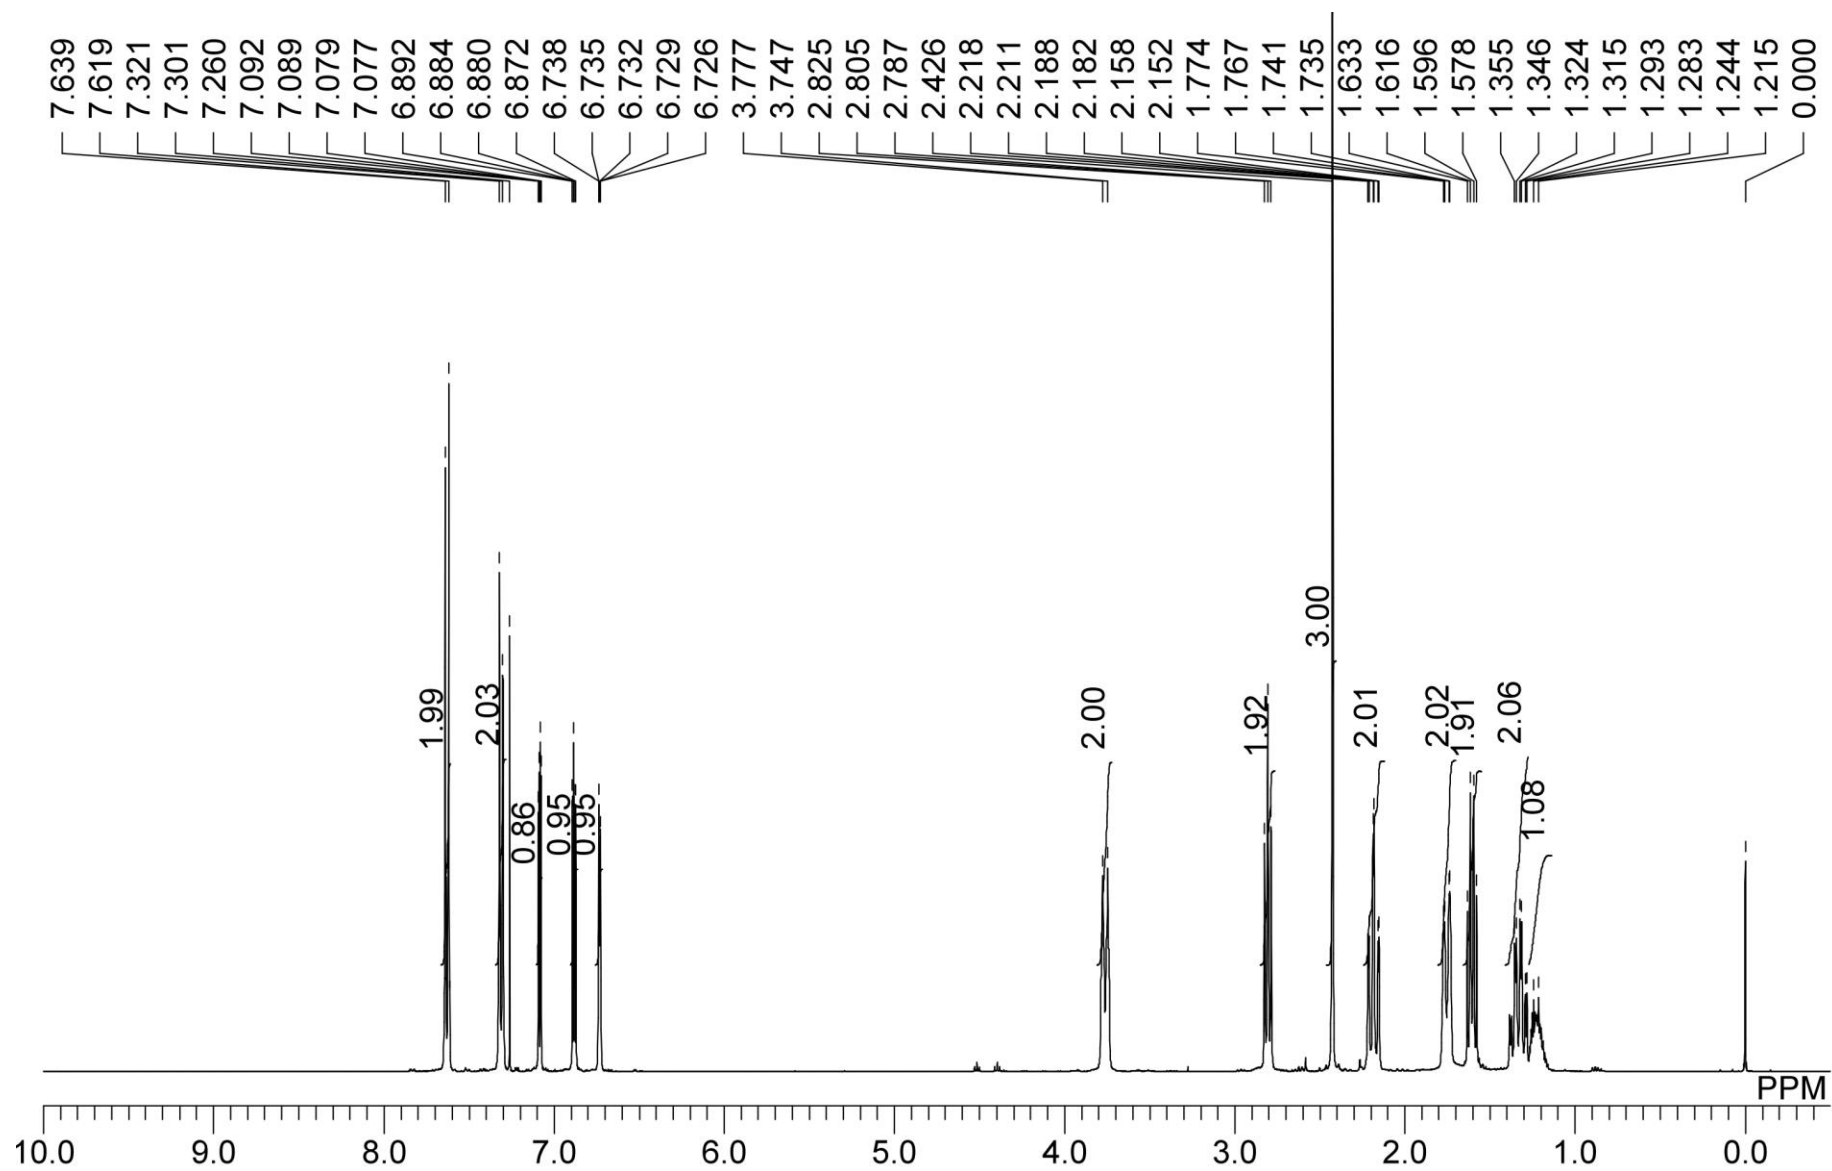

$^{13}\text{C}\{^1\text{H}\}$  NMR of **4gi**

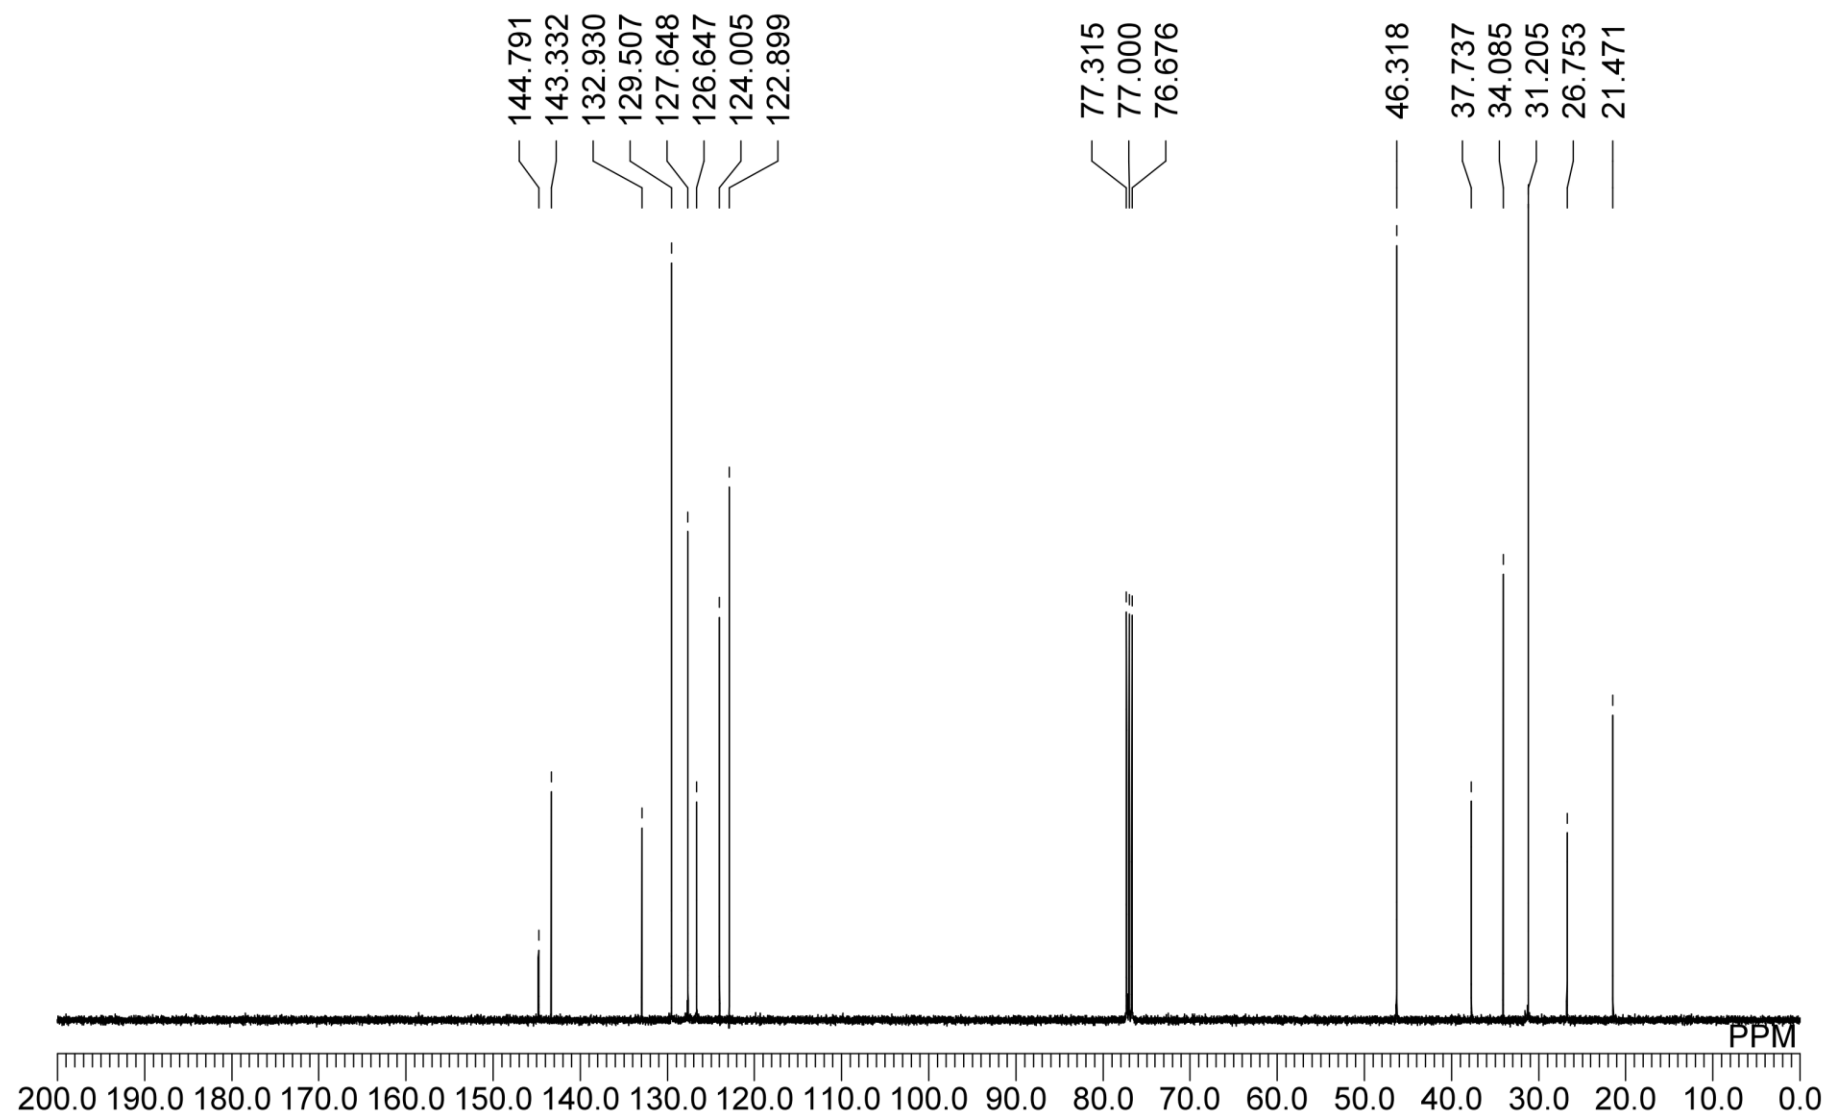



<sup>1</sup>H NMR of **3aj'** (a mixture of four isomers in a 1:1.3:1.4:1.5 ratio)

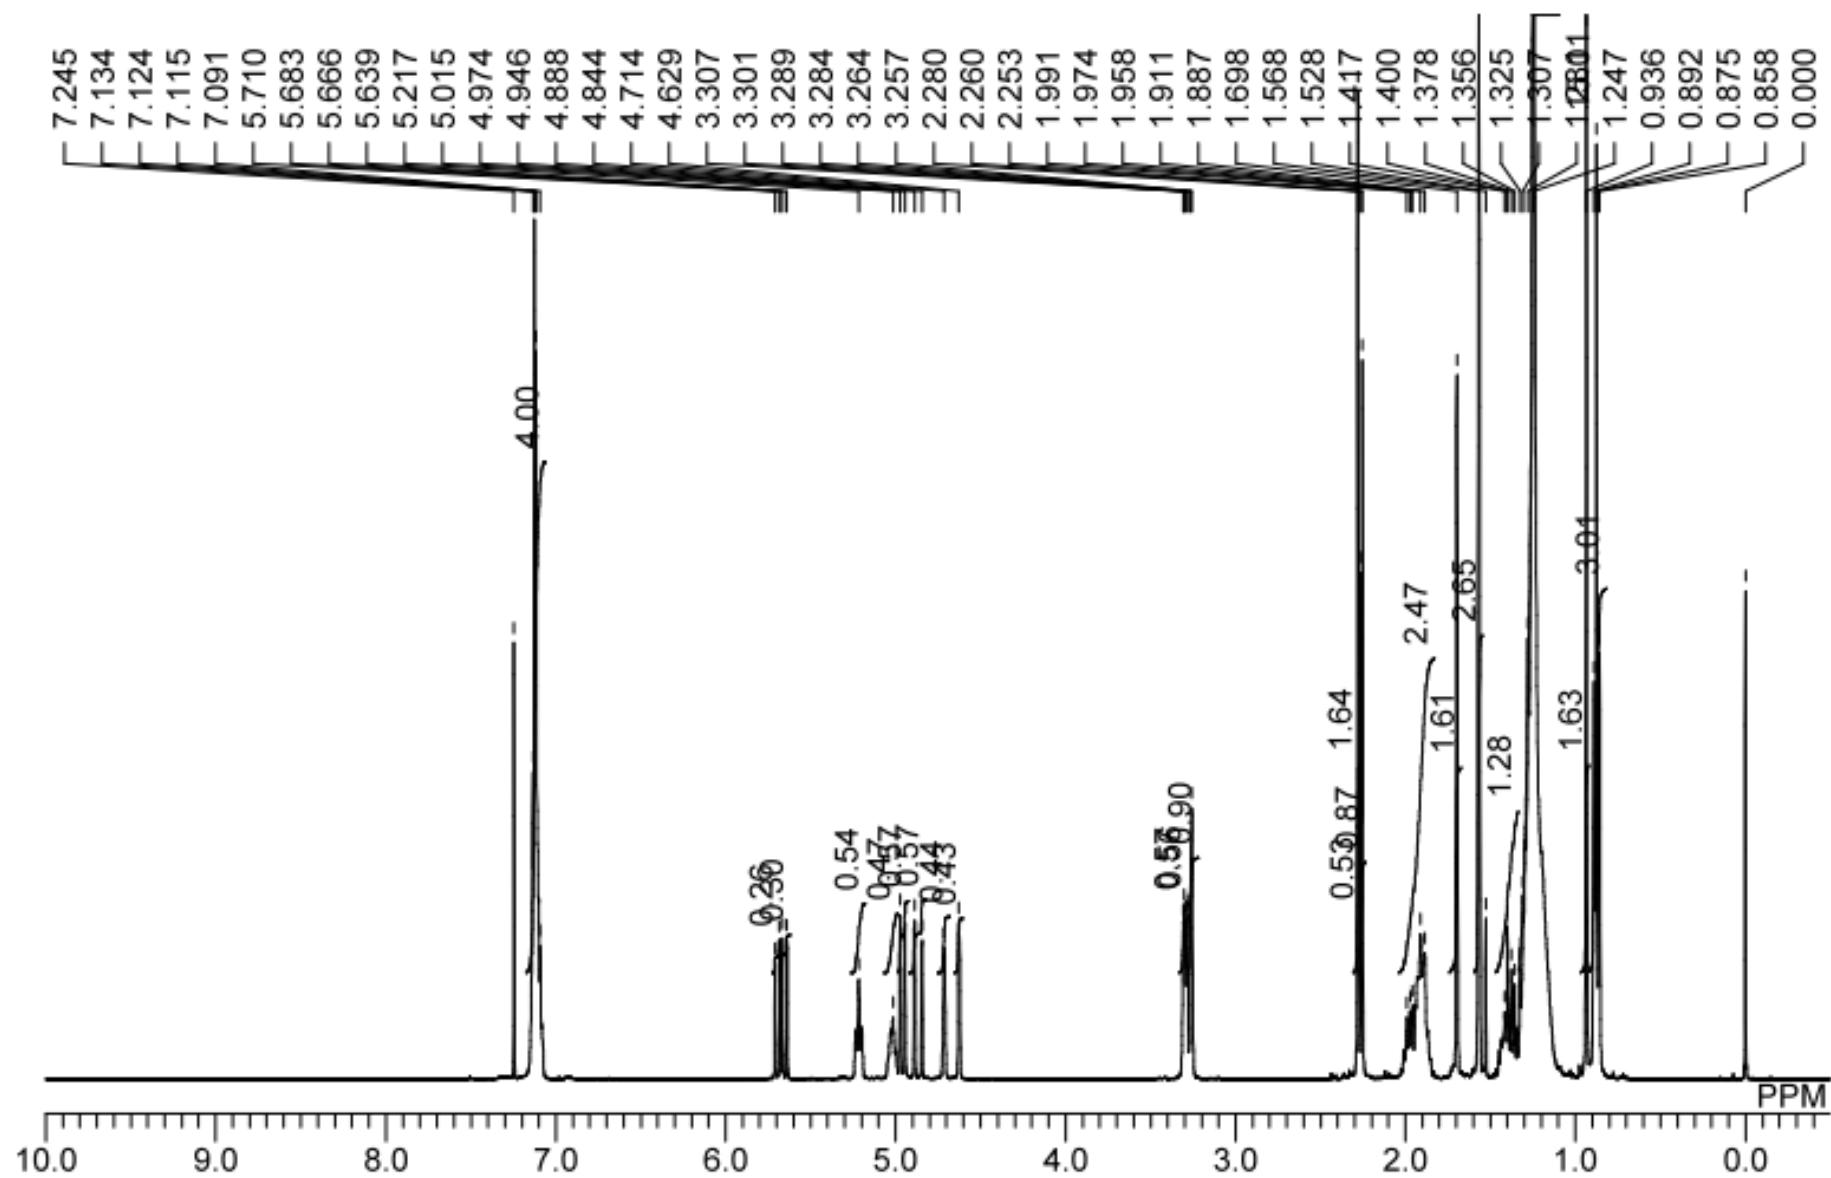

$^{13}\text{C}\{^1\text{H}\}$  NMR of **3aj'** (a mixture of four isomers in a 1:1.3:1.4:1.5 ratio)

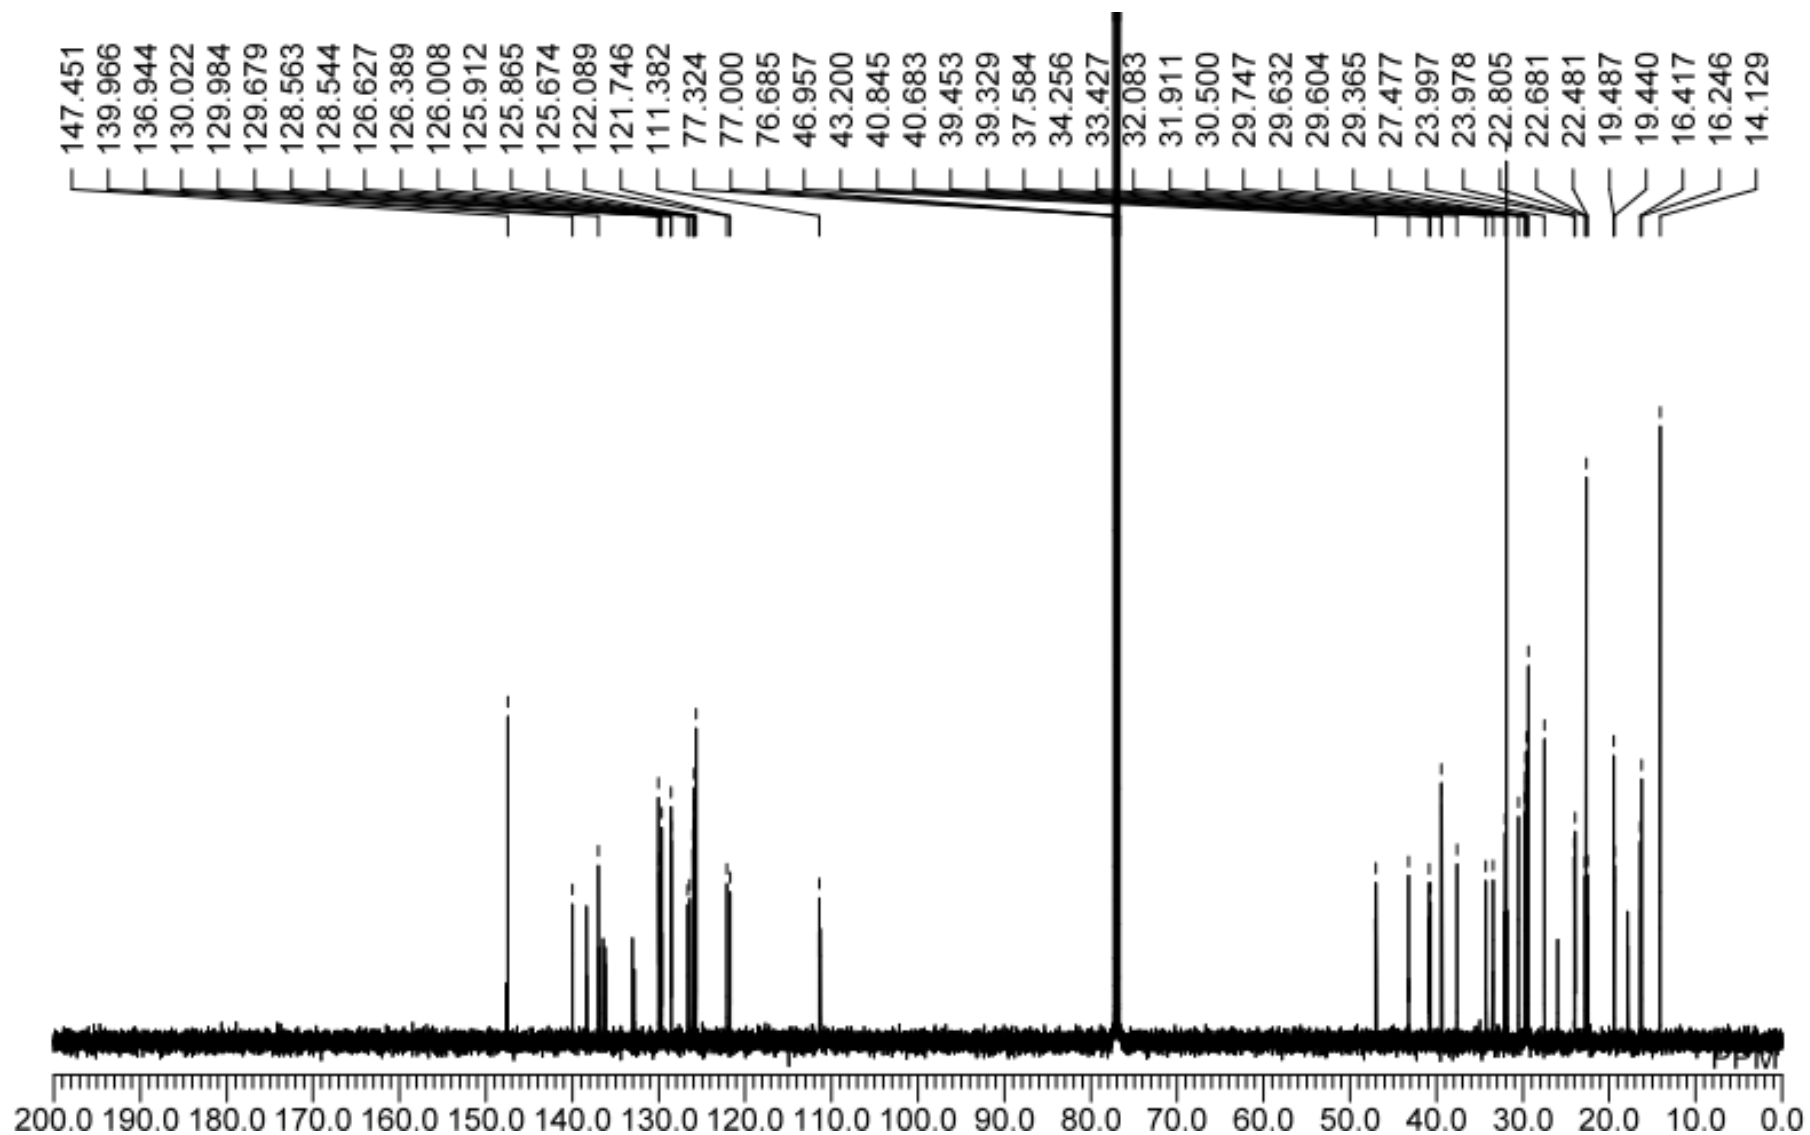

<sup>1</sup>H NMR of 4na

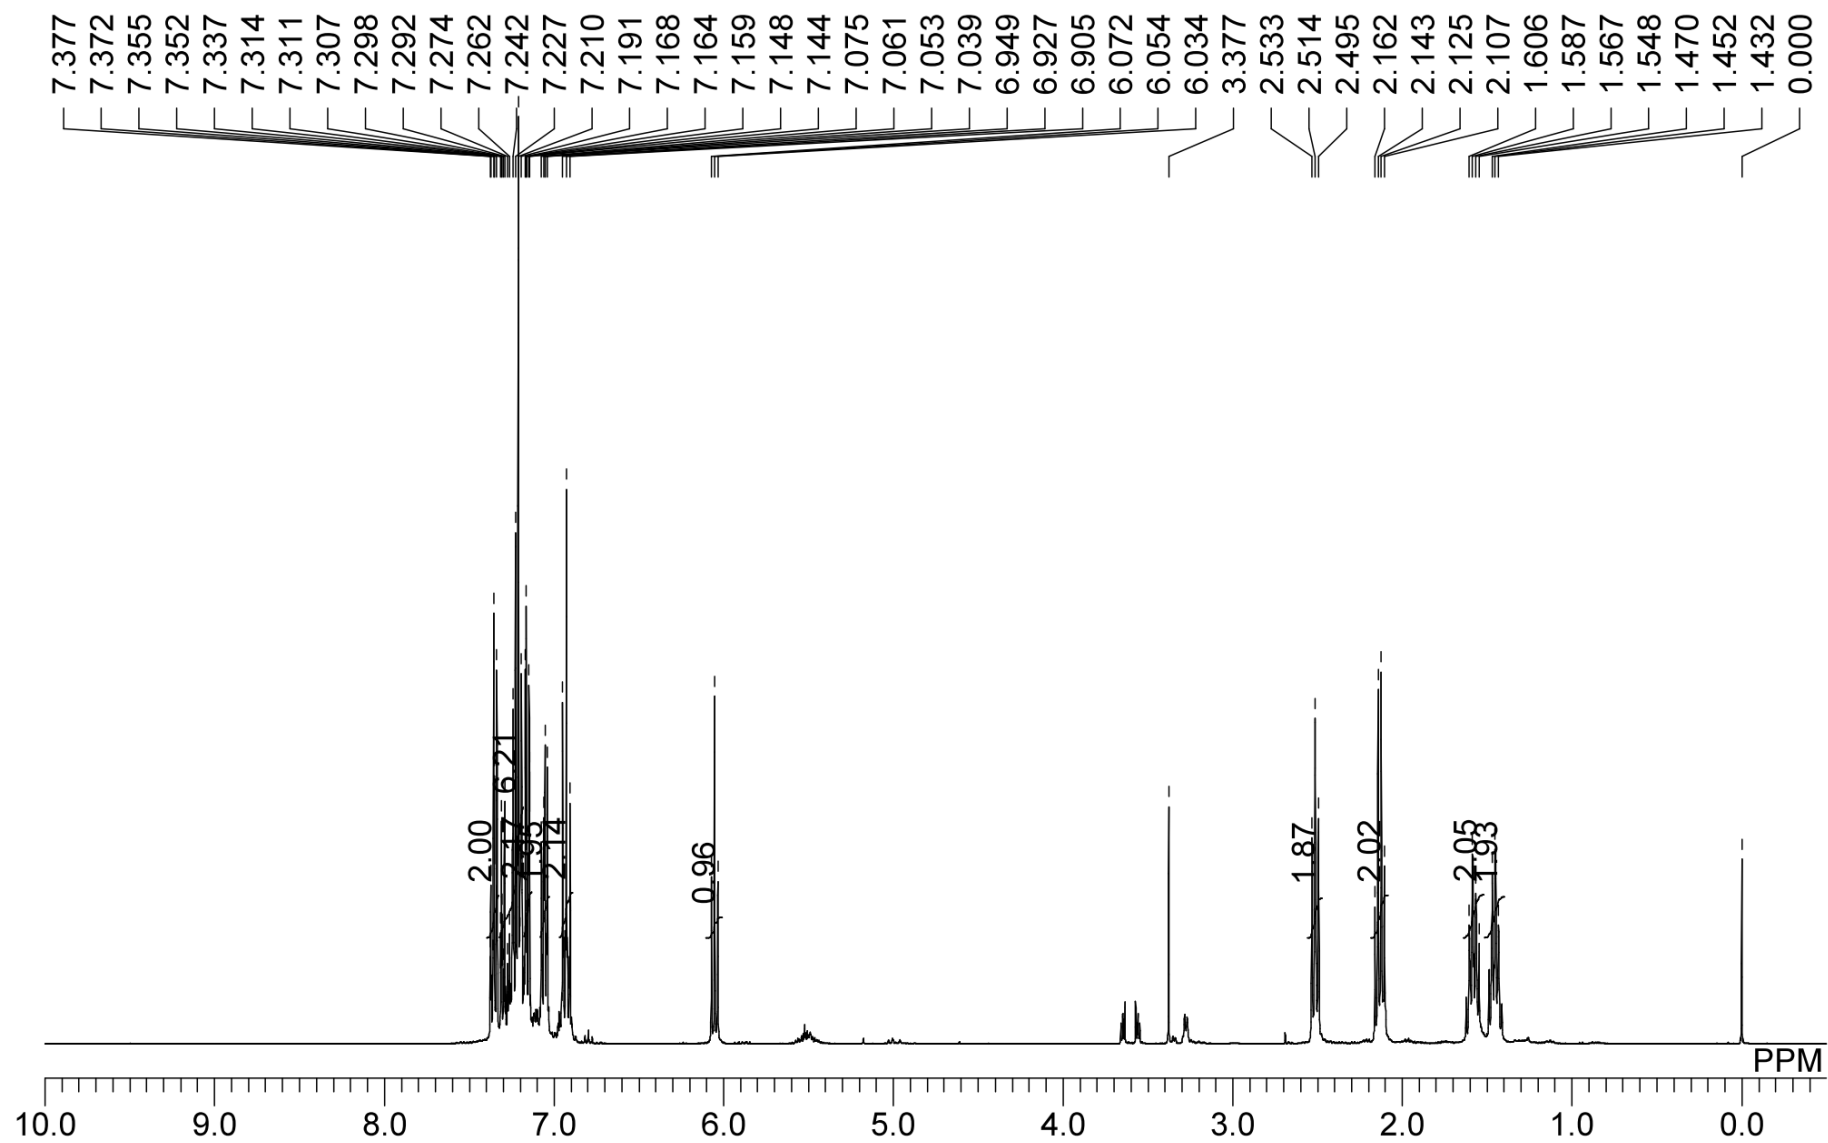

$^{13}\text{C}\{^1\text{H}\}$  NMR of **4na**

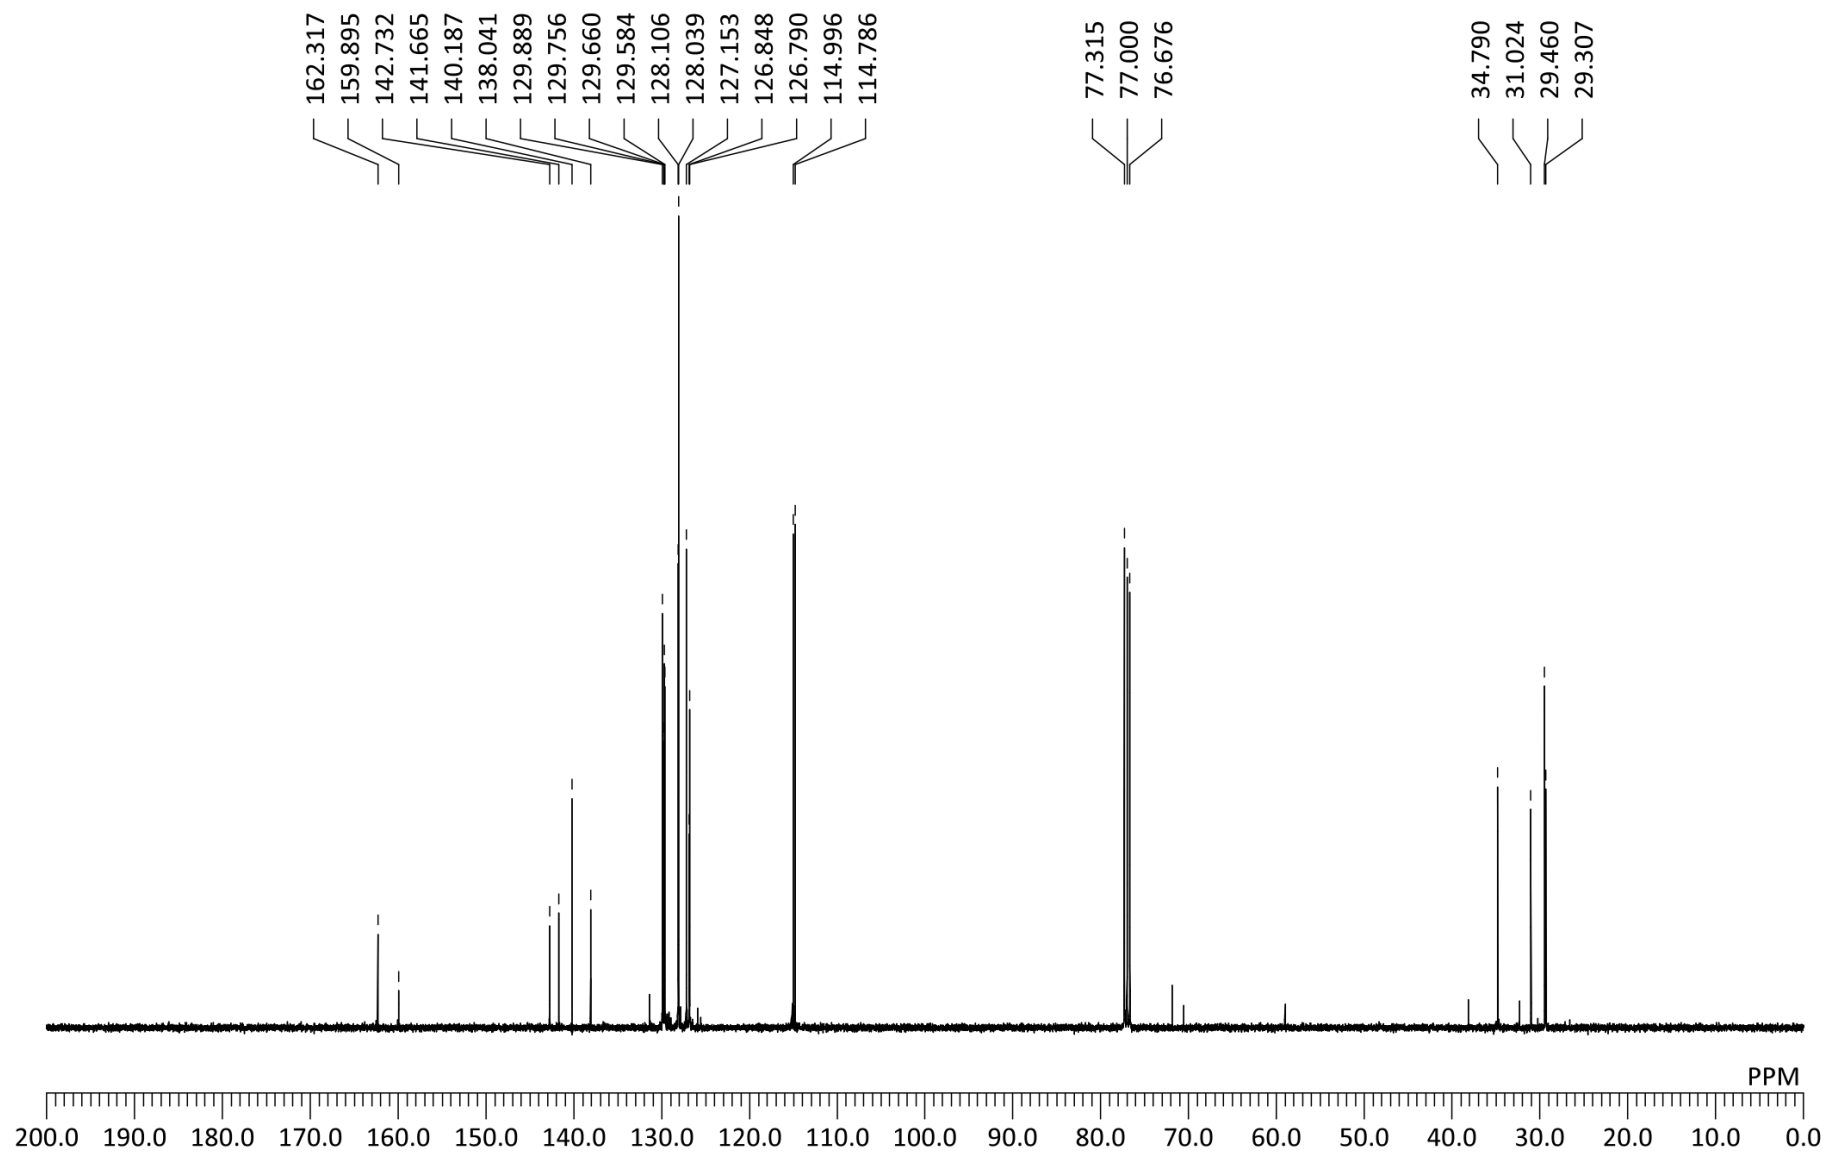

Supplement: SC-009-C7SC04675H-s001.pdf [file SC-009-C7SC04675H-s001.pdf]
